# Supplementary material for: Integrated data analysis reveals significant associations of KEAP1 mutations with DNA methylation alterations in lung adenocarcinomas
Source: Aging (Albany NY). 2020 Apr 23;12(8):7183–206. doi: 10.18632/aging.103068 (PMC7202502; doi:10.18632/aging.103068)
Supplement: Supplementary File 1 [file aging-12-103068-s001..xlsx]

## Sheet: Sheet1
TCGA 98 LUAD patient samples with KEAP1 mutations
sample ID	reference	alt	effect	aminoAcid
TCGA-69-8253-01	C	A	Nonsense_Mutation	p.E41*
TCGA-50-5936-01	G	A	Nonsense_Mutation	p.Q46*
TCGA-NJ-A4YQ-01	C	G	Missense_Mutation	p.V79L
TCGA-53-7624-01	C	A	Missense_Mutation	p.K97N
TCGA-64-5781-01	C	A	Missense_Mutation	p.V99L
TCGA-95-7043-01	A	G	Missense_Mutation	p.L100P
TCGA-95-7947-01	G	A	Missense_Mutation	p.S102L
TCGA-44-6778-01	T	C	Missense_Mutation	p.M110V
TCGA-55-6987-01	G	A	Missense_Mutation	p.R116W
TCGA-78-7153-01	C	T	Missense_Mutation	p.E117K
TCGA-73-4670-01	C	A	Missense_Mutation	p.V123L
TCGA-38-4631-01	G	T	Missense_Mutation	p.F139L
TCGA-44-6779-01	G	A	Missense_Mutation	p.T142M
TCGA-44-2655-01	G	A	Missense_Mutation	p.S144F
TCGA-17-Z011-01	G	A	Missense_Mutation	p.S144F
TCGA-17-Z030-01	T	A	Missense_Mutation	p.I145F
TCGA-44-6776-01	A	G	Missense_Mutation	p.V155A
TCGA-17-Z018-01	T	C	Missense_Mutation	p.M156V
TCGA-78-7162-01	C	A	Missense_Mutation	p.A159S
TCGA-91-6849-01	C	G	Missense_Mutation	p.A159P
TCGA-55-8094-01	T	C	Missense_Mutation	p.Y162C
TCGA-17-Z026-01	C	A	Missense_Mutation	p.Q163H
TCGA-MP-A4TI-01	G	A	Silent	p.S166S
TCGA-44-A47F-01	G	-	Frame_Shift_Del	p.L175fs
TCGA-55-7815-01	C	T	Missense_Mutation	p.A191T
TCGA-55-8505-01	G	A	Nonsense_Mutation	p.Q193*
TCGA-50-5066-02	C	A	Missense_Mutation	p.G195V
TCGA-97-8179-01	G	A	Nonsense_Mutation	p.Q201*
TCGA-75-6211-01	C	G	Missense_Mutation	p.R204P
TCGA-75-6206-01	C	A	Splice_Site	p.V214_splice
TCGA-73-7498-01	T	A	Missense_Mutation	p.E218V
TCGA-97-A4M3-01	C	G	Missense_Mutation	p.E219Q
TCGA-55-8510-01	C	G	Missense_Mutation	p.D235H
TCGA-91-6848-01	C	T	Missense_Mutation	p.D236N
TCGA-05-4389-01	G	C	Missense_Mutation	p.F246L
TCGA-78-7154-01	C	A	Missense_Mutation	p.W252C
TCGA-17-Z043-01	C	A	Missense_Mutation	p.R260L
TCGA-50-5939-01	C	G	Missense_Mutation	p.R261P
TCGA-49-6742-01	A	G	Missense_Mutation	p.L268P
TCGA-44-7660-01	C	T	Missense_Mutation	p.V271M
TCGA-44-7669-01	C	A	Missense_Mutation	p.V271L
TCGA-44-7671-01	G	A	Missense_Mutation	p.P278S
TCGA-78-7166-01	A	T	Missense_Mutation	p.F280Y
TCGA-55-7995-01	T	A	Missense_Mutation	p.Q284L
TCGA-49-4488-01	T	A	Missense_Mutation	p.Q284L
TCGA-73-4677-01	T	A	Nonsense_Mutation	p.K287*
TCGA-75-7027-01	G	A	Missense_Mutation	p.R320W
TCGA-55-6970-01	-	A	Frame_Shift_Ins	p.G323fs
TCGA-49-4486-01	C	T	Missense_Mutation	p.G333S
TCGA-86-8281-01	C	T	Missense_Mutation	p.G333S
TCGA-78-7633-01	C	A	Missense_Mutation	p.G333C
TCGA-MP-A5C7-01	G	C	Nonsense_Mutation	p.Y345*
TCGA-73-4676-01	G	A	Missense_Mutation	p.R415C
TCGA-17-Z001-01	C	T	Missense_Mutation	p.R415H
TCGA-55-8620-01	C	A	Missense_Mutation	p.G417W
TCGA-50-5051-01	C	T	Missense_Mutation	p.G417R
TCGA-67-3771-01	C	T	Missense_Mutation	p.G417E
TCGA-53-A4EZ-01	C	A	Missense_Mutation	p.G417V
TCGA-55-8302-01	C	A	Missense_Mutation	p.G417V
TCGA-50-5068-01	C	A	Missense_Mutation	p.G423V
TCGA-55-8085-01	C	A	Missense_Mutation	p.G429V
TCGA-62-8398-01	C	A	Missense_Mutation	p.G430V
TCGA-55-A492-01	C	A	Nonsense_Mutation	p.E441*
TCGA-35-3615-01	C	A	Nonsense_Mutation	p.E449*
TCGA-62-A470-01	ATCCTTC	-	Frame_Shift_Del	p.RRI459fs
TCGA-05-4418-01	T	C	Missense_Mutation	p.R460G
TCGA-78-7158-01	T	C	Missense_Mutation	p.I461V
TCGA-49-4507-01	G	A	Missense_Mutation	p.R470C
TCGA-49-4514-01	G	T	Missense_Mutation	p.R470S
TCGA-55-1594-01	C	T	Missense_Mutation	p.R470H
TCGA-86-8674-01	C	A	Missense_Mutation	p.G476V
TCGA-78-7156-01	C	-	Frame_Shift_Del	p.G477fs
TCGA-05-4395-01	T	C	Missense_Mutation	p.D479G
TCGA-78-7167-01	C	A	Missense_Mutation	p.G480W
TCGA-MP-A4T7-01	C	A	Missense_Mutation	p.G480W
TCGA-67-3774-01	G	A	Missense_Mutation	p.R483C
TCGA-78-7146-01	G	-	Frame_Shift_Del	p.P492fs
TCGA-78-7149-01	C	A	Missense_Mutation	p.W497L
TCGA-17-Z036-01	A	-	Frame_Shift_Del	p.I500fs
TCGA-49-4506-01	A	T	Missense_Mutation	p.M503K
TCGA-55-5899-01	C	A	Missense_Mutation	p.G509W
TCGA-62-A46O-01	C	A	Missense_Mutation	p.G509V
TCGA-97-8176-01	C	T	Missense_Mutation	p.G523E
TCGA-05-4384-01	C	A	Missense_Mutation	p.G524C
TCGA-49-6743-01	C	A	Missense_Mutation	p.G527V
TCGA-J2-8194-01	GTTTC	-	Frame_Shift_Del	p.ET542fs
TCGA-99-8033-01	C	T	Missense_Mutation	p.R554Q
TCGA-86-8358-01	C	T	Missense_Mutation	p.G558E
TCGA-78-7220-01	G	A	Silent	p.I559I
TCGA-55-A4DF-01	C	A	Splice_Site
TCGA-55-6972-01	A	T	Splice_Site
TCGA-44-7667-01	C	A	Splice_Site
TCGA-NJ-A55R-01	C	T	Missense_Mutation	p.G571D
TCGA-35-5375-01	C	-	Frame_Shift_Del	p.E593fs
TCGA-73-4666-01	C	A	Missense_Mutation	p.G603W
TCGA-MP-A4TE-01	C	-	Frame_Shift_Del	p.V604fs
TCGA-44-A4SS-01	G	-	Frame_Shift_Del	p.P612fs
TCGA-55-8506-01	C	A	Missense_Mutation	p.Q616H
77 KEAP1 Mutated LUAD patient samples that have both methylation and gene expression data
		sample ID
		TCGA-05-4384-01
		TCGA-35-5375-01
		TCGA-38-4631-01
		TCGA-44-6776-01
		TCGA-44-6778-01
		TCGA-44-6779-01
		TCGA-44-7660-01
		TCGA-44-7667-01
		TCGA-44-7669-01
		TCGA-44-7671-01
		TCGA-44-A47F-01
		TCGA-44-A4SS-01
		TCGA-49-4488-01
		TCGA-49-4514-01
		TCGA-49-6742-01
		TCGA-49-6743-01
		TCGA-50-5051-01
		TCGA-50-5066-02
		TCGA-50-5068-01
		TCGA-50-5936-01
		TCGA-50-5939-01
		TCGA-53-7624-01
		TCGA-53-A4EZ-01
		TCGA-55-5899-01
		TCGA-55-6970-01
		TCGA-55-6972-01
		TCGA-55-6987-01
		TCGA-55-7815-01
		TCGA-55-7995-01
		TCGA-55-8085-01
		TCGA-55-8094-01
		TCGA-55-8302-01
		TCGA-55-8505-01
		TCGA-55-8506-01
		TCGA-55-8510-01
		TCGA-55-8620-01
		TCGA-55-A492-01
		TCGA-55-A4DF-01
		TCGA-62-8398-01
		TCGA-62-A46O-01
		TCGA-62-A470-01
		TCGA-64-5781-01
		TCGA-69-8253-01
		TCGA-73-4676-01
		TCGA-73-7498-01
		TCGA-75-6206-01
		TCGA-75-6211-01
		TCGA-75-7027-01
		TCGA-78-7146-01
		TCGA-78-7149-01
		TCGA-78-7153-01
		TCGA-78-7154-01
		TCGA-78-7156-01
		TCGA-78-7158-01
		TCGA-78-7162-01
		TCGA-78-7166-01
		TCGA-78-7167-01
		TCGA-78-7220-01
		TCGA-78-7633-01
		TCGA-86-8281-01
		TCGA-86-8358-01
		TCGA-86-8674-01
		TCGA-91-6848-01
		TCGA-91-6849-01
		TCGA-95-7043-01
		TCGA-95-7947-01
		TCGA-97-8176-01
		TCGA-97-8179-01
		TCGA-97-A4M3-01
		TCGA-99-8033-01
		TCGA-J2-8194-01
		TCGA-MP-A4T7-01
		TCGA-MP-A4TE-01
		TCGA-MP-A4TI-01
		TCGA-MP-A5C7-01
		TCGA-NJ-A4YQ-01
		TCGA-NJ-A55R-01
