# Supplementary material for: Integrated data analysis reveals significant associations of KEAP1 mutations with DNA methylation alterations in lung adenocarcinomas
Source: Aging (Albany NY). 2020 Apr 23;12(8):7183–206. doi: 10.18632/aging.103068 (PMC7202502; doi:10.18632/aging.103068)
Supplement: Supplementary File 2 [file aging-12-103068-s002..xlsx]

## Sheet:  data sets
Training data set (185 patient)
KEAP1 mutated LUAD patient samples ID (30 patients)				wild type LUAD patient samples ID (155 patients)
		TCGA-05-4384-01				TCGA-05-4390-01
		TCGA-38-4631-01				TCGA-05-4396-01
		TCGA-44-6776-01				TCGA-05-4405-01
		TCGA-44-6779-01				TCGA-05-4410-01
		TCGA-44-7671-01				TCGA-05-4415-01
		TCGA-49-4488-01				TCGA-05-4417-01
		TCGA-49-4514-01				TCGA-05-4424-01
		TCGA-49-6742-01				TCGA-05-4425-01
		TCGA-50-5051-01				TCGA-05-4433-01
		TCGA-50-5936-01				TCGA-05-5420-01
		TCGA-50-5939-01				TCGA-05-5423-01
		TCGA-55-6970-01				TCGA-05-5428-01
		TCGA-55-6972-01				TCGA-05-5429-01
		TCGA-55-7815-01				TCGA-05-5715-01
		TCGA-64-5781-01				TCGA-38-4632-01
		TCGA-73-4676-01				TCGA-38-6178-01
		TCGA-75-6211-01				TCGA-44-2656-01
		TCGA-75-7027-01				TCGA-44-2665-01
		TCGA-78-7149-01				TCGA-44-2666-01
		TCGA-78-7153-01				TCGA-44-4112-01
		TCGA-78-7154-01				TCGA-44-5645-01
		TCGA-78-7156-01				TCGA-44-6145-01
		TCGA-78-7158-01				TCGA-44-6146-01
		TCGA-78-7166-01				TCGA-44-6147-01
		TCGA-78-7167-01				TCGA-44-6774-01
		TCGA-78-7633-01				TCGA-44-6775-01
		TCGA-91-6849-01				TCGA-44-6777-01
		TCGA-95-7043-01				TCGA-44-7659-01
		TCGA-95-7947-01				TCGA-44-7662-01
		TCGA-73-7498-01				TCGA-44-7670-01
						TCGA-44-7672-01
						TCGA-49-4487-01
						TCGA-49-4490-01
						TCGA-49-4512-01
						TCGA-49-6744-01
						TCGA-49-6745-01
						TCGA-49-6761-01
						TCGA-49-6767-01
						TCGA-50-5044-01
						TCGA-50-5049-01
						TCGA-50-5055-01
						TCGA-50-5068-01
						TCGA-50-5072-01
						TCGA-50-5931-01
						TCGA-50-5932-01
						TCGA-50-5933-01
						TCGA-50-5935-01
						TCGA-50-5941-01
						TCGA-50-5942-01
						TCGA-50-5944-01
						TCGA-50-6593-01
						TCGA-50-6595-01
						TCGA-50-6597-01
						TCGA-50-6673-01
						TCGA-50-7109-01
						TCGA-53-7626-01
						TCGA-53-7813-01
						TCGA-55-6543-01
						TCGA-55-6642-01
						TCGA-55-6712-01
						TCGA-55-6971-01
						TCGA-55-6978-01
						TCGA-55-6979-01
						TCGA-55-6980-01
						TCGA-55-6981-01
						TCGA-55-6982-01
						TCGA-55-6983-01
						TCGA-55-6985-01
						TCGA-55-6986-01
						TCGA-55-7281-01
						TCGA-55-7283-01
						TCGA-55-7573-01
						TCGA-55-7574-01
						TCGA-55-7576-01
						TCGA-55-7725-01
						TCGA-55-7727-01
						TCGA-55-7728-01
						TCGA-55-7903-01
						TCGA-55-7907-01
						TCGA-55-7911-01
						TCGA-55-7914-01
						TCGA-64-1679-01
						TCGA-64-1681-01
						TCGA-64-5774-01
						TCGA-64-5775-01
						TCGA-64-5778-01
						TCGA-67-6215-01
						TCGA-67-6216-01
						TCGA-67-6217-01
						TCGA-69-7760-01
						TCGA-69-7761-01
						TCGA-69-7763-01
						TCGA-69-7764-01
						TCGA-69-7765-01
						TCGA-71-6725-01
						TCGA-73-4658-01
						TCGA-75-5122-01
						TCGA-75-5126-01
						TCGA-75-5146-01
						TCGA-75-5147-01
						TCGA-75-6203-01
						TCGA-75-6205-01
						TCGA-75-6207-01
						TCGA-75-6212-01
						TCGA-75-6214-01
						TCGA-75-7025-01
						TCGA-75-7030-01
						TCGA-75-7031-01
						TCGA-78-7143-01
						TCGA-78-7145-01
						TCGA-78-7147-01
						TCGA-78-7148-01
						TCGA-78-7150-01
						TCGA-78-7152-01
						TCGA-78-7155-01
						TCGA-78-7159-01
						TCGA-78-7160-01
						TCGA-78-7161-01
						TCGA-78-7162-01
						TCGA-78-7163-01
						TCGA-78-7535-01
						TCGA-78-7536-01
						TCGA-78-7537-01
						TCGA-78-7539-01
						TCGA-78-7540-01
						TCGA-78-7542-01
						TCGA-80-5607-01
						TCGA-80-5608-01
						TCGA-86-6562-01
						TCGA-86-6851-01
						TCGA-86-7713-01
						TCGA-86-7714-01
						TCGA-91-6828-01
						TCGA-91-6829-01
						TCGA-91-6835-01
						TCGA-91-6840-01
						TCGA-91-6847-01
						TCGA-91-7771-01
						TCGA-93-7347-01
						TCGA-93-7348-01
						TCGA-95-7039-01
						TCGA-95-7567-01
						TCGA-97-7546-01
						TCGA-97-7552-01
						TCGA-97-7553-01
						TCGA-97-7554-01
						TCGA-97-7937-01
						TCGA-97-7938-01
						TCGA-97-7941-01
						TCGA-99-7458-01
						TCGA-95-7948-01
						TCGA-73-7499-01
						TCGA-55-7724-01
						TCGA-55-7726-01
						TCGA-69-7980-01
Validation data set (186 patient)
KEAP1 mutated LUAD patient samples ID (30 patients)				wild type LUAD patient samples ID (156 patients)
		TCGA.35.5375.01			TCGA.05.4427.01
		TCGA.44.6778.01			TCGA.38.7271.01
		TCGA.44.7660.01			TCGA.38.A44F.01
		TCGA.44.7669.01			TCGA.44.2668.01
		TCGA.44.A47F.01			TCGA.44.3918.01
		TCGA.53.7624.01			TCGA.44.7661.01
		TCGA.55.5899.01			TCGA.44.8117.01
		TCGA.55.7995.01			TCGA.44.8120.01
		TCGA.55.8085.01			TCGA.44.A47A.01
		TCGA.55.8505.01			TCGA.44.A47B.01
		TCGA.55.8620.01			TCGA.44.A4SU.01
		TCGA.55.A492.01			TCGA.49.AAQV.01
		TCGA.62.8398.01			TCGA.49.AAR3.01
		TCGA.62.A46O.01			TCGA.49.AARN.01
		TCGA.62.A470.01			TCGA.49.AARO.01
		TCGA.75.6206.01			TCGA.50.5045.01
		TCGA.78.7162.01			TCGA.50.5066.01
		TCGA.78.7220.01			TCGA.50.5930.01
		TCGA.86.8281.01			TCGA.50.5946.01
		TCGA.86.8674.01			TCGA.50.5946.02
		TCGA.97.8176.01			TCGA.50.6590.01
		TCGA.97.8179.01			TCGA.50.8457.01
		TCGA.97.A4M3.01			TCGA.50.8460.01
		TCGA.99.8033.01			TCGA.55.7227.01
		TCGA.J2.8194.01			TCGA.55.7816.01
		TCGA.MP.A4T7.01			TCGA.55.7910.01
		TCGA.MP.A4TE.01			TCGA.55.7913.01
		TCGA.MP.A5C7.01			TCGA.55.7994.01
		TCGA.NJ.A4YQ.01			TCGA.55.8087.01
		TCGA.NJ.A55R.01			TCGA.55.8089.01
					TCGA.55.8090.01
					TCGA.55.8091.01
					TCGA.55.8097.01
					TCGA.55.8203.01
					TCGA.55.8205.01
					TCGA.55.8206.01
					TCGA.55.8207.01
					TCGA.55.8299.01
					TCGA.55.8301.01
					TCGA.55.8508.01
					TCGA.55.8511.01
					TCGA.55.8512.01
					TCGA.55.8513.01
					TCGA.55.8614.01
					TCGA.55.8616.01
					TCGA.55.8619.01
					TCGA.55.8621.01
					TCGA.55.A48X.01
					TCGA.55.A48Y.01
					TCGA.55.A48Z.01
					TCGA.55.A493.01
					TCGA.55.A494.01
					TCGA.55.A4DG.01
					TCGA.55.A57B.01
					TCGA.62.8397.01
					TCGA.62.8399.01
					TCGA.62.8402.01
					TCGA.62.A46P.01
					TCGA.62.A46R.01
					TCGA.62.A46V.01
					TCGA.62.A46Y.01
					TCGA.62.A472.01
					TCGA.64.5779.01
					TCGA.64.5815.01
					TCGA.67.4679.01
					TCGA.69.7974.01
					TCGA.69.7978.01
					TCGA.69.7979.01
					TCGA.71.8520.01
					TCGA.75.5125.01
					TCGA.78.8648.01
					TCGA.78.8655.01
					TCGA.78.8662.01
					TCGA.83.5908.01
					TCGA.86.7711.01
					TCGA.86.7953.01
					TCGA.86.7955.01
					TCGA.86.8054.01
					TCGA.86.8055.01
					TCGA.86.8074.01
					TCGA.86.8075.01
					TCGA.86.8076.01
					TCGA.86.8278.01
					TCGA.86.8279.01
					TCGA.86.8280.01
					TCGA.86.8359.01
					TCGA.86.8585.01
					TCGA.86.8668.01
					TCGA.86.8671.01
					TCGA.86.8673.01
					TCGA.86.A4JF.01
					TCGA.86.A4P7.01
					TCGA.86.A4P8.01
					TCGA.91.6831.01
					TCGA.91.6836.01
					TCGA.91.8496.01
					TCGA.91.8497.01
					TCGA.91.A4BC.01
					TCGA.91.A4BD.01
					TCGA.93.A4JN.01
					TCGA.93.A4JO.01
					TCGA.93.A4JP.01
					TCGA.93.A4JQ.01
					TCGA.95.7562.01
					TCGA.95.7944.01
					TCGA.95.8039.01
					TCGA.95.8494.01
					TCGA.95.A4VN.01
					TCGA.95.A4VP.01
					TCGA.97.8171.01
					TCGA.97.8172.01
					TCGA.97.8174.01
					TCGA.97.8175.01
					TCGA.97.8177.01
					TCGA.97.8552.01
					TCGA.97.A4LX.01
					TCGA.97.A4M0.01
					TCGA.97.A4M1.01
					TCGA.97.A4M2.01
					TCGA.97.A4M5.01
					TCGA.99.8025.01
					TCGA.99.8028.01
					TCGA.99.AA5R.01
					TCGA.J2.8192.01
					TCGA.J2.A4AD.01
					TCGA.J2.A4AE.01
					TCGA.J2.A4AG.01
					TCGA.L4.A4E5.01
					TCGA.L4.A4E6.01
					TCGA.L9.A444.01
					TCGA.L9.A50W.01
					TCGA.L9.A743.01
					TCGA.L9.A7SV.01
					TCGA.L9.A8F4.01
					TCGA.MN.A4N1.01
					TCGA.MN.A4N4.01
					TCGA.MN.A4N5.01
					TCGA.MP.A4SW.01
					TCGA.MP.A4T2.01
					TCGA.MP.A4T4.01
					TCGA.MP.A4T6.01
					TCGA.MP.A4T9.01
					TCGA.MP.A4TA.01
					TCGA.MP.A4TC.01
					TCGA.MP.A4TF.01
					TCGA.MP.A4TH.01
					TCGA.MP.A4TK.01
					TCGA.NJ.A4YF.01
					TCGA.NJ.A4YG.01
					TCGA.NJ.A4YI.01
					TCGA.NJ.A4YP.01
					TCGA.NJ.A55A.01
					TCGA.NJ.A55O.01
					TCGA.NJ.A7XG.01
					TCGA.O1.A52J.01
					TCGA.S2.AA1A.01
Third data set (62 patients)
KEAP1 mutated LUAD patient samples ID (30 patients)				Normal individuals ID (32 )
	TCGA-05-4384-01			TCGA-05-5420-11A-01
	TCGA-38-4631-01			TCGA-38-4631-11A-01
	TCGA-44-6776-01			TCGA-38-4632-11A-01
	TCGA-44-6779-01			TCGA-44-2655-11A-01
	TCGA-44-7671-01			TCGA-44-2656-11A-01
	TCGA-49-4488-01			TCGA-44-2659-11A-01
	TCGA-49-4514-01			TCGA-44-2662-11A-01
	TCGA-49-6742-01			TCGA-44-2665-11A-01
	TCGA-50-5051-01			TCGA-44-2668-11A-01
	TCGA-50-5936-01			TCGA-44-5643-11A-01
	TCGA-50-5939-01			TCGA-44-5645-11A-01
	TCGA-55-6970-01			TCGA-44-6144-11A-01
	TCGA-55-6972-01			TCGA-44-6145-11A-01
	TCGA-55-7815-01			TCGA-44-6146-11A-01
	TCGA-64-5781-01			TCGA-44-6147-11A-01
	TCGA-73-4676-01			TCGA-44-6148-11A-01
	TCGA-75-6211-01			TCGA-44-6778-11A-01
	TCGA-75-7027-01			TCGA-49-4488-11A-01
	TCGA-78-7149-01			TCGA-49-6745-11A-01
	TCGA-78-7153-01			TCGA-50-5930-11A-01
	TCGA-78-7154-01			TCGA-50-5931-11A-01
	TCGA-78-7156-01			TCGA-50-5932-11A-01
	TCGA-78-7158-01			TCGA-50-5933-11A-01
	TCGA-78-7166-01			TCGA-50-5935-11A-01
	TCGA-78-7167-01			TCGA-50-5936-11A-01
	TCGA-78-7633-01			TCGA-50-5939-11A-01
	TCGA-91-6849-01			TCGA-50-6591-11A-01
	TCGA-95-7043-01			TCGA-50-6592-11A-01
	TCGA-95-7947-01			TCGA-50-6593-11A-01
	TCGA-73-7498-01			TCGA-50-6594-11A-01
				TCGA-73-4658-11A-01
				TCGA-73-4676-11A-01
