# Supplementary material for: Integrated data analysis reveals significant associations of KEAP1 mutations with DNA methylation alterations in lung adenocarcinomas
Source: Aging (Albany NY). 2020 Apr 23;12(8):7183–206. doi: 10.18632/aging.103068 (PMC7202502; doi:10.18632/aging.103068)
Supplement: Supplementary File 3 [file aging-12-103068-s005..xlsx]

## Sheet: KEAP1.MUT vs WT
KEAP1 .MUT vs WT (Training data set)
Probe ID	Beta value_Keap1 mutated_mean2	Beta value_Wild type _mean2	Delta beta value	P_values	Q-values	Chromosome	Start	End	Gene_Symbol	Gene_Type	Transcript_ID	Position_to_TSS	CGI_Coordinate	Feature_Type
cg10880599	0.386143	0.765641	-0.379498	1.60156e-10	3.6569e-09	chr14	64941762	64941763	CHURC1;CHURC1;CHURC1-FNTB;CHURC1-FNTB;CHURC1-FNTB;CHURC1-FNTB;GPX2;GPX2;GPX2;GPX2;GPX2	protein_coding;protein_coding;protein_coding;protein_coding;protein_coding;protein_coding;protein_coding;protein_coding;protein_coding;protein_coding;protein_coding	ENST00000551093.4;ENST00000551947.4;ENST00000549987.1;ENST00000551823.1;ENST00000552941.4;ENST00000553743.4;ENST00000389614.5;ENST00000553522.1;ENST00000557049.1;ENST00000557323.1;ENST00000612794.1	27284;27318;27268;17725;27276;17725;1052;984;959;985;1144	CGI:chr14:64914357-64914664	.
cg03217915	0.49037	0.863695	-0.373325	1.0242e-07	4.66158e-07	*	-1	-1	.	.	.	.	.	.
cg04909257	0.43354	0.792983	-0.359444	3.10677e-09	3.0402e-08	chr1	10402441	10402442	PGD;PGD;PGD;PGD;PGD;PGD	protein_coding;protein_coding;protein_coding;protein_coding;protein_coding;protein_coding	ENST00000270776.11;ENST00000460189.1;ENST00000465632.4;ENST00000477958.4;ENST00000483936.4;ENST00000491493.4	3360;2808;2942;3367;3328;3848	CGI:chr1:10398491-10399940	S_Shelf
cg04806177	0.396089	0.744901	-0.348812	1.94048e-07	7.59559e-07	chr16	1941446	1941447	MSRB1;MSRB1;MSRB1;MSRB1;MSRB1;MSRB1	protein_coding;protein_coding;protein_coding;protein_coding;protein_coding;protein_coding	ENST00000361871.6;ENST00000399753.2;ENST00000473663.1;ENST00000489198.1;ENST00000564908.1;ENST00000622125.3	1881;1750;1678;494;1754;1848	CGI:chr16:1942667-1943645	N_Shore
cg23230478	0.442994	0.791033	-0.348039	7.80695e-08	3.68811e-07	chr1	6300560	6300561	ACOT7;ACOT7;ACOT7;ACOT7;ACOT7;ACOT7;ACOT7;ACOT7;ACOT7	protein_coding;protein_coding;protein_coding;protein_coding;protein_coding;protein_coding;protein_coding;protein_coding;protein_coding	ENST00000361521.7;ENST00000377842.6;ENST00000377845.6;ENST00000377855.5;ENST00000377860.7;ENST00000418124.4;ENST00000473466.2;ENST00000545482.4;ENST00000608083.4	93832;58785;60148;85254;92802;92802;51690;93207;92802	CGI:chr1:6281076-6281352	.
cg00926657	0.453988	0.797762	-0.343774	2.79092e-09	2.9412e-08	chr17	81922946	81922947	MAFG;MAFG;MAFG;RP11-498C9.12	protein_coding;protein_coding;protein_coding;antisense	ENST00000357736.7;ENST00000392366.6;ENST00000574686.1;ENST00000580897.1	4769;587;4763;46	CGI:chr17:81922573-81922996	Island
cg03331715	0.395137	0.738902	-0.343764	5.90815e-09	5.05885e-08	chr12	104295309	104295310	TXNRD1;TXNRD1;TXNRD1;TXNRD1;TXNRD1;TXNRD1;TXNRD1;TXNRD1;TXNRD1;TXNRD1;TXNRD1;TXNRD1;TXNRD1;TXNRD1;TXNRD1;TXNRD1;TXNRD1;TXNRD1;TXNRD1	protein_coding;protein_coding;protein_coding;protein_coding;protein_coding;protein_coding;protein_coding;protein_coding;protein_coding;protein_coding;protein_coding;protein_coding;protein_coding;protein_coding;protein_coding;protein_coding;protein_coding;protein_coding;protein_coding	ENST00000354940.9;ENST00000388854.6;ENST00000397736.5;ENST00000429002.5;ENST00000503506.5;ENST00000524698.4;ENST00000525566.4;ENST00000526266.4;ENST00000526390.4;ENST00000526580.4;ENST00000526691.4;ENST00000527335.4;ENST00000527688.4;ENST00000528079.5;ENST00000529546.4;ENST00000529751.1;ENST00000529784.4;ENST00000531689.4;ENST00000531691.4	8626;8626;8626;79529;8626;7940;79529;9306;8318;8251;8427;6413;6590;8259;8286;8284;7986;8313;8383	CGI:chr12:104288823-104289215	.
cg02731193	0.432624	0.772641	-0.340017	7.64023e-08	3.68811e-07	chr6	53542388	53542389	GCLC;GCLC;GCLC;GCLC;GCLC;GCLC	protein_coding;protein_coding;protein_coding;protein_coding;protein_coding;protein_coding	ENST00000229416.9;ENST00000504525.1;ENST00000505197.1;ENST00000513939.4;ENST00000514004.4;ENST00000616923.3	2742;2701;74583;2221;2646;2742	CGI:chr6:53544322-53545301	N_Shore
cg19648686	0.50631	0.840304	-0.333994	5.60146e-09	5.05885e-08	chr10	5002800	5002801	AKR1C1;AKR1C2;AKR1C2;AKR1C2;AKR1C2;AKR1C2;AKR1C2;AKR1C2	protein_coding;protein_coding;protein_coding;protein_coding;protein_coding;protein_coding;protein_coding;protein_coding	ENST00000434459.5;ENST00000380753.7;ENST00000407674.4;ENST00000421196.6;ENST00000455190.2;ENST00000460124.4;ENST00000604184.1;ENST00000604507.4	39354;1224;132427;1061;1215;1224;1062;15156	CGI:chr10:4825933-4826605	.
cg09643186	0.359505	0.689766	-0.330261	1.7761e-09	2.21205e-08	chr14	64942734	64942735	CHURC1;CHURC1;CHURC1-FNTB;CHURC1-FNTB;CHURC1-FNTB;CHURC1-FNTB;GPX2;GPX2;GPX2;GPX2;GPX2	protein_coding;protein_coding;protein_coding;protein_coding;protein_coding;protein_coding;protein_coding;protein_coding;protein_coding;protein_coding;protein_coding	ENST00000551093.4;ENST00000551947.4;ENST00000549987.1;ENST00000551823.1;ENST00000552941.4;ENST00000553743.4;ENST00000389614.5;ENST00000553522.1;ENST00000557049.1;ENST00000557323.1;ENST00000612794.1	28256;28290;28240;18697;28248;18697;80;12;-13;13;172	CGI:chr14:64914357-64914664	.
cg26155983	0.413658	0.734963	-0.321305	5.73817e-08	3.02357e-07	chr14	64943427	64943428	CHURC1;CHURC1;CHURC1-FNTB;CHURC1-FNTB;CHURC1-FNTB;CHURC1-FNTB;GPX2;GPX2;GPX2;GPX2;GPX2	protein_coding;protein_coding;protein_coding;protein_coding;protein_coding;protein_coding;protein_coding;protein_coding;protein_coding;protein_coding;protein_coding	ENST00000551093.4;ENST00000551947.4;ENST00000549987.1;ENST00000551823.1;ENST00000552941.4;ENST00000553743.4;ENST00000389614.5;ENST00000553522.1;ENST00000557049.1;ENST00000557323.1;ENST00000612794.1	28949;28983;28933;19390;28941;19390;-613;-681;-706;-680;-521	CGI:chr14:64971694-64972645	.
cg09489844	0.622448	0.943357	-0.320909	2.30829e-09	2.6353e-08	chr17	81922771	81922772	MAFG;MAFG;RP11-498C9.12;SIRT7	protein_coding;protein_coding;antisense;protein_coding	ENST00000357736.7;ENST00000392366.6;ENST00000580897.1;ENST00000572902.4	4944;762;-129;-1447	CGI:chr17:81922573-81922996	Island
cg18484212	0.562936	0.873711	-0.310776	1.29845e-06	2.73673e-06	chr20	650817	650818	RP5-850E9.3;SRXN1	protein_coding;protein_coding	ENST00000488788.2;ENST00000381962.3	24984;2554	CGI:chr20:652897-653462	N_Shelf
cg23012192	0.524153	0.828998	-0.304844	1.07183e-06	2.40722e-06	chr5	179823985	179823986	SQSTM1;SQSTM1;SQSTM1;SQSTM1;SQSTM1;SQSTM1;SQSTM1;SQSTM1;SQSTM1;SQSTM1	protein_coding;protein_coding;protein_coding;protein_coding;protein_coding;protein_coding;protein_coding;protein_coding;protein_coding;protein_coding	ENST00000360718.5;ENST00000389805.7;ENST00000422245.4;ENST00000464493.4;ENST00000466342.1;ENST00000485412.1;ENST00000504627.1;ENST00000508284.4;ENST00000510187.4;ENST00000514093.4	1499;3225;5106;3377;126;419;3079;3106;3063;17576	CGI:chr5:179820784-179821711	S_Shelf
cg09562655	0.620022	0.909091	-0.28907	2.20864e-06	4.29972e-06	chr3	185986417	185986418	.	.	.	.	CGI:chr3:185937268-185938241	.
cg20372666	0.498055	0.783132	-0.285076	8.61545e-10	1.4754e-08	chr10	69390154	69390155	HK1;HK1;HK1;HK1	protein_coding;protein_coding;protein_coding;protein_coding	ENST00000298649.6;ENST00000359426.6;ENST00000360289.5;ENST00000448642.5	74299;71309;120153;120153	CGI:chr10:69408649-69409196	.
cg04020792	0.528897	0.806375	-0.277478	2.01562e-05	2.8468e-05	chr12	110340709	110340710	ATP2A2;ATP2A2;ATP2A2;ATP2A2	protein_coding;protein_coding;protein_coding;protein_coding	ENST00000308664.9;ENST00000377685.8;ENST00000539276.5;ENST00000548169.2	59592;59411;59027;48659	CGI:chr12:110280587-110282257	.
cg19509829	0.539269	0.807274	-0.268004	4.97037e-06	8.01107e-06	chr12	110340860	110340861	ATP2A2;ATP2A2;ATP2A2;ATP2A2	protein_coding;protein_coding;protein_coding;protein_coding	ENST00000308664.9;ENST00000377685.8;ENST00000539276.5;ENST00000548169.2	59743;59562;59178;48810	CGI:chr12:110280587-110282257	.
cg14420550	0.553532	0.816315	-0.262783	2.10962e-07	8.02828e-07	chr6	14777909	14777910	RP11-146I2.1	lincRNA	ENST00000629853.1	244056	CGI:chr6:15244646-15245802	.
cg16088116	0.54604	0.803859	-0.257818	4.22371e-07	1.23117e-06	*	-1	-1	.	.	.	.	.	.
cg18496841	0.502429	0.756702	-0.254273	6.94067e-07	1.6682e-06	chr8	1546859	1546860	DLGAP2;DLGAP2	protein_coding;protein_coding	ENST00000421627.5;ENST00000612087.1	45492;45492	CGI:chr8:1546939-1547167	N_Shore
cg25478712	0.64572	0.897965	-0.252246	2.7314e-07	9.5776e-07	*	-1	-1	.	.	.	.	.	.
cg01189072	0.554857	0.805006	-0.250148	4.44777e-05	5.64208e-05	chr1	1679221	1679222	CDK11B;MMP23B;MMP23B;SLC35E2B;SLC35E2B;SLC35E2B;SLC35E2B	protein_coding;protein_coding;protein_coding;protein_coding;protein_coding;protein_coding;protein_coding	ENST00000317673.8;ENST00000412810.5;ENST00000618459.3;ENST00000481276.1;ENST00000611123.1;ENST00000614300.3;ENST00000617444.3	43598;47039;47041;13489;13508;13504;13424	CGI:chr1:1676459-1676804	S_Shelf
cg05116443	0.494468	0.744446	-0.249979	2.57896e-06	4.77456e-06	chr20	63931327	63931328	DNAJC5;DNAJC5	protein_coding;protein_coding	ENST00000360864.7;ENST00000470551.1	36144;36144	CGI:chr20:63931192-63931509	Island
cg03295417	0.460375	0.707363	-0.246988	3.1079e-06	5.45875e-06	chr16	14304035	14304036	MIR193B;RP11-65J21.3;RP11-65J21.3	miRNA;lincRNA;lincRNA	ENST00000384907.1;ENST00000570945.1;ENST00000571639.1	67;1746;1529	CGI:chr16:14301747-14303218	S_Shore
cg21184216	0.429566	0.676259	-0.246693	1.84614e-08	1.23419e-07	chr5	103262333	103262334	C5orf30;C5orf30;C5orf30	protein_coding;protein_coding;protein_coding	ENST00000319933.5;ENST00000510890.1;ENST00000515669.4	3630;2908;3296	CGI:chr5:103258734-103259849	S_Shelf
cg07522403	0.485209	0.730998	-0.245788	3.18825e-11	8.90182e-10	chr7	66640997	66640998	KCTD7;KCTD7	protein_coding;protein_coding	ENST00000275532.6;ENST00000503687.1	12115;12038	CGI:chr7:66628361-66629332	.
cg01233518	0.583613	0.829148	-0.245534	4.18885e-07	1.23117e-06	*	-1	-1	.	.	.	.	.	.
cg00230120	0.608213	0.848961	-0.240748	4.6872e-06	7.6446e-06	chr12	1500180	1500181	.	.	.	.	CGI:chr12:1529867-1531584	.
cg04708126	0.459461	0.700107	-0.240647	2.28753e-05	3.13392e-05	chr13	113065126	113065127	MCF2L;MCF2L;MCF2L;MCF2L;MCF2L;MCF2L;MCF2L;MCF2L;MCF2L	protein_coding;protein_coding;protein_coding;protein_coding;protein_coding;protein_coding;protein_coding;protein_coding;protein_coding	ENST00000375597.7;ENST00000375604.5;ENST00000375608.6;ENST00000397030.4;ENST00000421756.4;ENST00000423251.1;ENST00000464800.4;ENST00000475524.1;ENST00000535094.5	63371;63411;170747;96625;85813;20274;813;435;95904	CGI:chr13:113067206-113067893	N_Shelf
cg13713739	0.563255	0.803007	-0.239752	0.000213022	0.000229795	chr9	129721098	129721099	PRRX2	protein_coding	ENST00000372469.5	55456	CGI:chr9:129720119-129720359	S_Shore
cg26161708	0.516345	0.75373	-0.237385	0.000103513	0.00011917	chr20	17614803	17614804	RRBP1;RRBP1;RRBP1;RRBP1;RRBP1;RRBP1;RRBP1;RRBP1	protein_coding;protein_coding;protein_coding;protein_coding;protein_coding;protein_coding;protein_coding;protein_coding	ENST00000246043.7;ENST00000360807.7;ENST00000377807.5;ENST00000377813.4;ENST00000455029.3;ENST00000468428.1;ENST00000470422.4;ENST00000610403.3	45705;67493;67481;67431;67258;5015;8528;45171	CGI:chr20:17614626-17614838	Island
cg02694576	0.58321	0.820319	-0.237109	3.05787e-06	5.44063e-06	chr11	488017	488018	PTDSS2;PTDSS2;PTDSS2;PTDSS2	protein_coding;protein_coding;protein_coding;protein_coding	ENST00000308020.5;ENST00000526878.4;ENST00000527325.1;ENST00000531411.1	37736;29342;777;-1334	CGI:chr11:489247-490115	N_Shore
cg21449256	0.598288	0.834783	-0.236495	1.44878e-05	2.08929e-05	chr8	1387978	1387979	.	.	.	.	CGI:chr8:1393054-1394000	.
cg10420310	0.388796	0.624976	-0.23618	5.34541e-07	1.40831e-06	chr16	14303719	14303720	MIR193B;RP11-65J21.3;RP11-65J21.3	miRNA;lincRNA;lincRNA	ENST00000384907.1;ENST00000570945.1;ENST00000571639.1	-249;1430;1213	CGI:chr16:14301747-14303218	S_Shore
cg02043895	0.523539	0.758488	-0.23495	3.9583e-07	1.20508e-06	*	-1	-1	.	.	.	.	.	.
cg07876051	0.532049	0.766934	-0.234886	0.000114506	0.000128585	chr10	3116953	3116954	PFKP;PFKP;PFKP	protein_coding;protein_coding;protein_coding	ENST00000381075.5;ENST00000381125.7;ENST00000413079.1	48325;49432;3494	CGI:chr10:3118696-3118915	N_Shore
cg06074146	0.473652	0.708504	-0.234851	8.32132e-07	1.93224e-06	chr13	20724310	20724311	.	.	.	.	CGI:chr13:20721472-20722299	S_Shelf
cg07701049	0.481754	0.716175	-0.234422	2.01445e-08	1.25445e-07	chr8	140549847	140549848	AGO2;AGO2;AGO2	protein_coding;protein_coding;protein_coding	ENST00000220592.8;ENST00000519980.4;ENST00000523609.4	85773;85700;85700	CGI:chr8:140549065-140549269	S_Shore
cg22836359	0.483839	0.716909	-0.23307	1.29598e-06	2.73673e-06	chr12	6824382	6824383	GPR162;GPR162;GPR162;GPR162;GPR162;GPR162	protein_coding;protein_coding;protein_coding;protein_coding;protein_coding;protein_coding	ENST00000311268.6;ENST00000382315.6;ENST00000428545.5;ENST00000535220.1;ENST00000541431.1;ENST00000545321.1	2836;2513;2677;2757;2552;-113	CGI:chr12:6824110-6824439	Island
cg05089897	0.59151	0.82444	-0.23293	1.28692e-07	5.50963e-07	chr21	37514361	37514362	DYRK1A;DYRK1A	protein_coding;protein_coding	ENST00000338785.6;ENST00000339659.7	146783;95455	CGI:chr21:37563552-37564244	.
cg26687670	0.415829	0.648701	-0.232872	2.9245e-07	9.77211e-07	chr1	241641637	241641638	OPN3;OPN3;OPN3;OPN3;OPN3	protein_coding;protein_coding;protein_coding;protein_coding;protein_coding	ENST00000366554.2;ENST00000463155.4;ENST00000469376.4;ENST00000478849.1;ENST00000490673.4	-1275;35740;-1296;-1426;-1281	CGI:chr1:241640245-241640590	S_Shore
cg13785123	0.640019	0.87168	-0.231661	3.56325e-06	6.02673e-06	chr1	8871076	8871077	ENO1;ENO1;ENO1;ENO1	protein_coding;protein_coding;protein_coding;protein_coding	ENST00000234590.7;ENST00000464920.1;ENST00000486051.4;ENST00000497492.1	7615;222;7613;7192	CGI:chr1:8878254-8879287	.
cg14055970	0.483183	0.712431	-0.229248	2.16391e-05	2.9945e-05	chr9	127825436	127825437	ENG;ENG;ENG;ENG	protein_coding;protein_coding;protein_coding;protein_coding	ENST00000344849.4;ENST00000373203.7;ENST00000480266.4;ENST00000486329.1	29201;29321;21732;-1030	CGI:chr9:127825253-127825810	Island
cg23248887	0.331803	0.560371	-0.228568	3.05596e-05	4.10457e-05	chr14	38210438	38210439	SSTR1	protein_coding	ENST00000267377.2	2438	CGI:chr14:38209040-38211732	Island
cg14215310	0.408826	0.637377	-0.228551	1.89182e-08	1.23419e-07	chr8	1466022	1466023	.	.	.	.	CGI:chr8:1456718-1456928	.
cg20542619	0.469349	0.697742	-0.228393	6.25986e-06	9.85748e-06	chr18	79529104	79529105	NFATC1;NFATC1;NFATC1;NFATC1;NFATC1	protein_coding;protein_coding;protein_coding;protein_coding;protein_coding	ENST00000253506.8;ENST00000318065.8;ENST00000329101.7;ENST00000397790.5;ENST00000545796.4	133247;128781;128767;133159;128829	CGI:chr18:79529018-79529464	Island
cg08162224	0.474184	0.701437	-0.227253	1.16709e-06	2.53796e-06	chr1	241641119	241641120	OPN3;OPN3;OPN3;OPN3;OPN3	protein_coding;protein_coding;protein_coding;protein_coding;protein_coding	ENST00000366554.2;ENST00000463155.4;ENST00000469376.4;ENST00000478849.1;ENST00000490673.4	-757;36258;-778;-908;-763	CGI:chr1:241640245-241640590	S_Shore
cg05241828	0.584403	0.811329	-0.226926	3.46498e-05	4.52097e-05	chr8	144503124	144503125	CTD-2517M22.14;CTD-2517M22.14;GPT;GPT;GPT;GPT;GPT;GPT;GPT	processed_transcript;processed_transcript;protein_coding;protein_coding;protein_coding;protein_coding;protein_coding;protein_coding;protein_coding	ENST00000527086.1;ENST00000528690.1;ENST00000354769.7;ENST00000394955.2;ENST00000527165.4;ENST00000527961.1;ENST00000528431.4;ENST00000531330.4;ENST00000534702.4	2321;1975;-1017;-959;-614;-1098;150;-1017;-1017	CGI:chr8:144500077-144501324	S_Shore
cg26502461	0.686191	0.91205	-0.225859	1.85746e-07	7.48447e-07	*	-1	-1	.	.	.	.	.	.
cg06273075	0.424208	0.649568	-0.22536	6.72168e-07	1.64441e-06	chr16	14303831	14303832	MIR193B;RP11-65J21.3;RP11-65J21.3	miRNA;lincRNA;lincRNA	ENST00000384907.1;ENST00000570945.1;ENST00000571639.1	-137;1542;1325	CGI:chr16:14301747-14303218	S_Shore
cg19335742	0.43371	0.65684	-0.223131	2.98622e-06	5.38305e-06	chr15	40274679	40274680	PAK6;PAK6;PAK6;PAK6;PAK6;PAK6;PAK6;PAK6;PAK6;PAK6	protein_coding;protein_coding;protein_coding;protein_coding;protein_coding;protein_coding;protein_coding;protein_coding;protein_coding;protein_coding	ENST00000260404.7;ENST00000441369.4;ENST00000453867.4;ENST00000455577.5;ENST00000542403.3;ENST00000557808.1;ENST00000558658.4;ENST00000558965.4;ENST00000559936.4;ENST00000560346.4	34808;57250;57250;35587;21494;748;57091;57250;57229;35258	CGI:chr15:40279877-40280557	.
cg11705747	0.574755	0.797879	-0.223123	1.56009e-06	3.19161e-06	chr2	128187494	128187495	UGGT1;UGGT1;UGGT1;UGGT1	protein_coding;protein_coding;protein_coding;protein_coding	ENST00000259253.9;ENST00000376723.6;ENST00000418197.1;ENST00000465836.1	96182;96282;7707;256	CGI:chr2:128232935-128233751	.
cg04505205	0.540725	0.763208	-0.222482	0.00493196	0.00493196	chr2	98388153	98388154	CNGA3;CNGA3;CNGA3;CNGA3;CNGA3	protein_coding;protein_coding;protein_coding;protein_coding;protein_coding	ENST00000272602.5;ENST00000393503.2;ENST00000393504.4;ENST00000409937.1;ENST00000436404.5	18215;8251;41997;10864;41964	CGI:chr2:98346410-98347724	.
cg24775180	0.544597	0.766277	-0.22168	1.14812e-06	2.53697e-06	chr12	131939154	131939155	PUS1;PUS1;PUS1;PUS1;PUS1;PUS1;PUS1	protein_coding;protein_coding;protein_coding;protein_coding;protein_coding;protein_coding;protein_coding	ENST00000322060.8;ENST00000376649.6;ENST00000443358.5;ENST00000535067.4;ENST00000537484.1;ENST00000538037.4;ENST00000542167.2	9911;9930;9953;9398;9388;9871;9877	CGI:chr12:131944983-131945194	.
cg23201695	0.475941	0.697054	-0.221113	1.44126e-09	1.97453e-08	chr8	1324793	1324794	.	.	.	.	CGI:chr8:1315257-1318172	.
cg20466478	0.459279	0.680092	-0.220813	3.17765e-06	5.51061e-06	chr8	37851091	37851092	BRF2;BRF2;BRF2;BRF2	protein_coding;protein_coding;protein_coding;protein_coding	ENST00000220659.9;ENST00000520601.4;ENST00000521170.4;ENST00000522539.1	-1186;-1252;-1229;-1236	CGI:chr8:37849631-37849989	S_Shore
cg09918657	0.220989	0.441431	-0.220442	1.05639e-05	1.55619e-05	chr16	14303350	14303351	MIR193B;RP11-65J21.3;RP11-65J21.3	miRNA;lincRNA;lincRNA	ENST00000384907.1;ENST00000570945.1;ENST00000571639.1	-618;1061;844	CGI:chr16:14301747-14303218	S_Shore
cg13474004	0.52131	0.741146	-0.219836	1.92872e-05	2.75244e-05	chr8	1835814	1835815	ARHGEF10;ARHGEF10;ARHGEF10;ARHGEF10	protein_coding;protein_coding;protein_coding;protein_coding	ENST00000349830.6;ENST00000398564.4;ENST00000518288.4;ENST00000520359.4	11837;9702;11798;11825	CGI:chr8:1831454-1831655	.
cg08911237	0.59277	0.811722	-0.218951	3.10788e-07	9.90185e-07	chr12	104356640	104356641	.	.	.	.	CGI:chr12:104303570-104304206	.
cg09957864	0.58924	0.806772	-0.217532	6.51603e-05	7.83067e-05	chr8	144503143	144503144	CTD-2517M22.14;CTD-2517M22.14;GPT;GPT;GPT;GPT;GPT;GPT;GPT	processed_transcript;processed_transcript;protein_coding;protein_coding;protein_coding;protein_coding;protein_coding;protein_coding;protein_coding	ENST00000527086.1;ENST00000528690.1;ENST00000354769.7;ENST00000394955.2;ENST00000527165.4;ENST00000527961.1;ENST00000528431.4;ENST00000531330.4;ENST00000534702.4	2302;1956;-998;-940;-595;-1079;169;-998;-998	CGI:chr8:144500077-144501324	S_Shore
cg14715697	0.460978	0.678177	-0.217199	0.000749239	0.000777619	chr17	79131405	79131406	RBFOX3;RBFOX3;RBFOX3;RBFOX3;RBFOX3;RBFOX3;RP11-398J5.1	protein_coding;protein_coding;protein_coding;protein_coding;protein_coding;protein_coding;antisense	ENST00000580155.4;ENST00000580508.1;ENST00000582043.4;ENST00000582139.1;ENST00000583458.4;ENST00000584778.4;ENST00000583980.1	384744;52068;104401;77152;351194;377464;-1318	CGI:chr17:79131323-79131524	Island
cg15457037	0.647117	0.864209	-0.217092	5.62299e-05	6.87812e-05	chr20	63931495	63931496	DNAJC5;DNAJC5	protein_coding;protein_coding	ENST00000360864.7;ENST00000470551.1	36312;36312	CGI:chr20:63931192-63931509	Island
cg16204066	0.485107	0.702011	-0.216904	9.27301e-07	2.11734e-06	chr6	33671145	33671146	ITPR3;ITPR3	protein_coding;protein_coding	ENST00000374316.8;ENST00000605930.2	50779;49765	CGI:chr6:33688189-33688461	.
cg05309505	0.525296	0.74163	-0.216334	1.56086e-06	3.19161e-06	chr11	612837	612838	IRF7;IRF7;IRF7;IRF7;IRF7;IRF7;IRF7;IRF7;IRF7;IRF7;IRF7	protein_coding;protein_coding;protein_coding;protein_coding;protein_coding;protein_coding;protein_coding;protein_coding;protein_coding;protein_coding;protein_coding	ENST00000330243.8;ENST00000348655.9;ENST00000397566.4;ENST00000397570.4;ENST00000397574.5;ENST00000469048.4;ENST00000525445.4;ENST00000528413.4;ENST00000531912.1;ENST00000532326.4;ENST00000533182.4	3134;2814;2892;2892;3163;2814;2790;1018;755;3147;3114	CGI:chr11:611691-611943	S_Shore
cg21531873	0.545351	0.761599	-0.216248	2.32737e-06	4.42847e-06	chr12	110340811	110340812	ATP2A2;ATP2A2;ATP2A2;ATP2A2	protein_coding;protein_coding;protein_coding;protein_coding	ENST00000308664.9;ENST00000377685.8;ENST00000539276.5;ENST00000548169.2	59694;59513;59129;48761	CGI:chr12:110280587-110282257	.
cg00719072	0.536775	0.751891	-0.215115	6.02459e-07	1.52846e-06	*	-1	-1	.	.	.	.	.	.
cg16002378	0.552395	0.767391	-0.214996	2.18765e-06	4.29972e-06	chr14	104570196	104570197	TMEM179	protein_coding	ENST00000415614.5	34564	CGI:chr14:104574970-104575224	.
cg14925067	0.645874	0.860005	-0.214132	3.39577e-05	4.47327e-05	chr8	1832235	1832236	ARHGEF10;ARHGEF10;ARHGEF10;ARHGEF10	protein_coding;protein_coding;protein_coding;protein_coding	ENST00000349830.6;ENST00000398564.4;ENST00000518288.4;ENST00000520359.4	8258;6123;8219;8246	CGI:chr8:1831454-1831655	S_Shore
cg10510159	0.565402	0.779305	-0.213903	0.000106988	0.000122145	chr16	48347689	48347690	LONP2;LONP2;LONP2;LONP2;LONP2	protein_coding;protein_coding;protein_coding;protein_coding;protein_coding	ENST00000285737.7;ENST00000535754.4;ENST00000564259.1;ENST00000565867.2;ENST00000566755.4	103392;103355;-408;13376;103300	CGI:chr16:48365819-48366129	.
cg16440561	0.42855	0.641713	-0.213164	6.27854e-05	7.61204e-05	chr2	219448132	219448133	SPEG;SPEG;SPEG;SPEG;SPEG;SPEG;SPEG;SPEG;SPEG;SPEG;SPEG;SPEG	protein_coding;protein_coding;protein_coding;protein_coding;protein_coding;protein_coding;protein_coding;protein_coding;protein_coding;protein_coding;protein_coding;protein_coding	ENST00000312358.10;ENST00000396698.4;ENST00000409595.2;ENST00000431523.4;ENST00000435853.4;ENST00000451076.1;ENST00000452101.1;ENST00000464989.4;ENST00000485813.4;ENST00000491248.1;ENST00000497065.1;ENST00000498378.4	13285;6086;3086;6108;6615;3474;6084;4457;2504;2551;2580;10856	CGI:chr2:219447976-219449372	Island
cg02349468	0.471093	0.683324	-0.21223	2.5083e-06	4.70736e-06	chr5	1093546	1093547	SLC12A7	protein_coding	ENST00000264930.8	18490	CGI:chr5:1093464-1093722	Island
cg07299736	0.597014	0.808955	-0.211941	0.000109814	0.000124335	chr8	134478544	134478545	ZFAT;ZFAT;ZFAT;ZFAT;ZFAT;ZFAT;ZFAT;ZFAT;ZFAT;ZFAT	protein_coding;protein_coding;protein_coding;protein_coding;protein_coding;protein_coding;protein_coding;protein_coding;protein_coding;protein_coding	ENST00000377838.6;ENST00000429442.5;ENST00000518408.4;ENST00000520214.4;ENST00000520356.4;ENST00000520727.4;ENST00000521673.4;ENST00000523243.4;ENST00000523399.4;ENST00000523924.4	234495;218015;87128;218011;218011;218011;31639;234506;234419;234495	CGI:chr8:134478543-134478843	Island
cg08996506	0.566243	0.778163	-0.21192	5.74876e-06	9.15791e-06	chr16	15977011	15977012	ABCC1;ABCC1	protein_coding;protein_coding	ENST00000399408.5;ENST00000399410.6	27433;27433	CGI:chr16:15949361-15950070	.
cg26819590	0.492378	0.704085	-0.211707	8.14215e-06	1.2258e-05	chr16	2055206	2055207	TSC2;TSC2;TSC2;TSC2;TSC2;TSC2;TSC2;TSC2;TSC2;TSC2	protein_coding;protein_coding;protein_coding;protein_coding;protein_coding;protein_coding;protein_coding;protein_coding;protein_coding;protein_coding	ENST00000219476.6;ENST00000350773.7;ENST00000382538.9;ENST00000401874.5;ENST00000432909.2;ENST00000439117.5;ENST00000439673.5;ENST00000467949.1;ENST00000568454.4;ENST00000568692.1	7740;7185;7225;7216;1772;7172;7191;-956;7003;909	CGI:chr16:2055013-2055389	Island
cg21851391	0.425335	0.636951	-0.211616	2.36308e-08	1.40757e-07	chr8	1500832	1500833	DLGAP2;DLGAP2	protein_coding;protein_coding	ENST00000421627.5;ENST00000612087.1	-535;-535	CGI:chr8:1495701-1495920	.
cg25073614	0.579513	0.79049	-0.210977	2.27555e-07	8.42569e-07	*	-1	-1	.	.	.	.	.	.
cg13261536	0.490982	0.701821	-0.210839	6.71622e-05	8.00106e-05	chr8	143261745	143261746	ZFP41;ZFP41;ZFP41	protein_coding;protein_coding;protein_coding	ENST00000330701.5;ENST00000522452.1;ENST00000626353.1	14816;14634;14816	CGI:chr8:143261617-143262144	Island
cg01827633	0.400949	0.611744	-0.210795	1.48669e-07	6.17202e-07	chr2	218745380	218745381	TTLL4;TTLL4;TTLL4;TTLL4;TTLL4;TTLL4;TTLL4;TTLL4;TTLL4;TTLL4;TTLL4;TTLL4;TTLL4;TTLL4	protein_coding;protein_coding;protein_coding;protein_coding;protein_coding;protein_coding;protein_coding;protein_coding;protein_coding;protein_coding;protein_coding;protein_coding;protein_coding;protein_coding	ENST00000258398.7;ENST00000392102.4;ENST00000417196.4;ENST00000434241.1;ENST00000442769.4;ENST00000457313.4;ENST00000461181.1;ENST00000465558.4;ENST00000467841.4;ENST00000475950.4;ENST00000480472.4;ENST00000480929.1;ENST00000491899.1;ENST00000494428.4	7805;34504;262;-776;34423;34534;-8;-772;-616;-753;-717;-760;-1382;-174	CGI:chr2:218710725-218711357	.
cg08063051	0.309975	0.520528	-0.210553	1.18895e-09	1.80985e-08	chr16	1378705	1378706	UNKL;UNKL;UNKL;UNKL;UNKL;UNKL;UNKL;UNKL	protein_coding;protein_coding;protein_coding;protein_coding;protein_coding;protein_coding;protein_coding;protein_coding	ENST00000248104.10;ENST00000389221.7;ENST00000397464.4;ENST00000402641.5;ENST00000403703.4;ENST00000508903.5;ENST00000513783.1;ENST00000515195.1	979;36016;979;976;941;35987;417;472	CGI:chr16:1379049-1380103	N_Shore
cg14510688	0.584794	0.795323	-0.210528	1.03462e-05	1.54068e-05	chr12	131939181	131939182	PUS1;PUS1;PUS1;PUS1;PUS1;PUS1;PUS1	protein_coding;protein_coding;protein_coding;protein_coding;protein_coding;protein_coding;protein_coding	ENST00000322060.8;ENST00000376649.6;ENST00000443358.5;ENST00000535067.4;ENST00000537484.1;ENST00000538037.4;ENST00000542167.2	9938;9957;9980;9425;9415;9898;9904	CGI:chr12:131944983-131945194	.
cg02767634	0.649135	0.85941	-0.210276	3.64886e-05	4.6719e-05	chr5	179609636	179609637	RUFY1;RUFY1;RUFY1;RUFY1	protein_coding;protein_coding;protein_coding;protein_coding	ENST00000319449.7;ENST00000393438.5;ENST00000437570.5;ENST00000508797.1	59077;49943;49943;2369	CGI:chr5:179623001-179624610	.
cg08387538	0.493711	0.703046	-0.209335	0.00253947	0.00255814	chr8	1579829	1579830	DLGAP2;DLGAP2;DLGAP2;DLGAP2-AS1	protein_coding;protein_coding;protein_coding;antisense	ENST00000421627.5;ENST00000520901.4;ENST00000612087.1;ENST00000518063.4	78462;31184;78462;40707	CGI:chr8:1561684-1563569	.
cg26075742	0.464246	0.673549	-0.209302	6.46004e-06	1.00571e-05	chr8	10895727	10895728	.	.	.	.	CGI:chr8:10924544-10924793	.
cg07658280	0.637532	0.846522	-0.208989	7.1833e-06	1.10574e-05	chr8	144503107	144503108	CTD-2517M22.14;CTD-2517M22.14;GPT;GPT;GPT;GPT;GPT;GPT;GPT	processed_transcript;processed_transcript;protein_coding;protein_coding;protein_coding;protein_coding;protein_coding;protein_coding;protein_coding	ENST00000527086.1;ENST00000528690.1;ENST00000354769.7;ENST00000394955.2;ENST00000527165.4;ENST00000527961.1;ENST00000528431.4;ENST00000531330.4;ENST00000534702.4	2338;1992;-1034;-976;-631;-1115;133;-1034;-1034	CGI:chr8:144500077-144501324	S_Shore
cg04227892	0.393364	0.602234	-0.20887	3.25838e-06	5.57998e-06	chr5	2169288	2169289	.	.	.	.	CGI:chr5:2180137-2180353	.
cg07795964	0.622352	0.831064	-0.208712	3.48054e-08	1.90734e-07	chr4	2064593	2064594	NAT8L;NAT8L	protein_coding;protein_coding	ENST00000331662.3;ENST00000423729.2	4780;5080	CGI:chr4:2063815-2064671	Island
cg04018325	0.435413	0.643802	-0.208389	4.72914e-07	1.2937e-06	chr16	14303828	14303829	MIR193B;RP11-65J21.3;RP11-65J21.3	miRNA;lincRNA;lincRNA	ENST00000384907.1;ENST00000570945.1;ENST00000571639.1	-140;1539;1322	CGI:chr16:14301747-14303218	S_Shore
cg01963754	0.53915	0.745757	-0.206607	0.000804867	0.000829074	chr13	111324901	111324902	TEX29;TEX29	protein_coding;protein_coding	ENST00000283547.1;ENST00000497241.4	4232;8716	CGI:chr13:111326241-111326752	N_Shore
cg13929323	0.35785	0.564268	-0.206418	1.27574e-08	9.19876e-08	chr9	111601786	111601787	.	.	.	.	CGI:chr9:111631066-111631925	.
cg10857729	0.429836	0.636085	-0.206249	0.00173399	0.00177281	*	-1	-1	.	.	.	.	.	.
cg01089364	0.57049	0.776469	-0.205979	8.22815e-05	9.71773e-05	chr1	246618130	246618131	CNST;CNST;CNST;CNST	protein_coding;protein_coding;protein_coding;protein_coding	ENST00000366511.1;ENST00000366512.6;ENST00000366513.7;ENST00000483271.1	51615;51668;51683;51685	CGI:chr1:246619895-246620615	N_Shore
cg16560389	0.535961	0.74188	-0.20592	0.000183048	0.000202239	chr10	131519938	131519939	.	.	.	.	CGI:chr10:131519765-131520061	Island
cg11026867	0.448999	0.654763	-0.205763	3.14726e-08	1.79656e-07	chr12	6364477	6364478	SCNN1A;SCNN1A;SCNN1A;SCNN1A;SCNN1A;SCNN1A;SCNN1A;SCNN1A;SCNN1A;SCNN1A	protein_coding;protein_coding;protein_coding;protein_coding;protein_coding;protein_coding;protein_coding;protein_coding;protein_coding;protein_coding	ENST00000228916.5;ENST00000338748.8;ENST00000360168.6;ENST00000396966.5;ENST00000536176.1;ENST00000538979.4;ENST00000540037.4;ENST00000542966.1;ENST00000543768.1;ENST00000544882.1	11073;10327;10748;10327;10903;10958;-329;-851;12883;11087	CGI:chr12:6363310-6364156	S_Shore
cg00125455	0.515685	0.720894	-0.205208	2.77039e-05	3.75786e-05	chr20	45945632	45945633	PCIF1;PCIF1	protein_coding;protein_coding	ENST00000372409.6;ENST00000479348.2	11003;624	CGI:chr20:45946182-45946383	N_Shore
cg24872610	0.511155	0.71632	-0.205165	0.00183771	0.00186494	chr10	3116802	3116803	PFKP;PFKP;PFKP	protein_coding;protein_coding;protein_coding	ENST00000381075.5;ENST00000381125.7;ENST00000413079.1	48174;49281;3343	CGI:chr10:3118696-3118915	N_Shore
cg14491776	0.568338	0.773387	-0.205049	8.9123e-05	0.000104358	*	-1	-1	.	.	.	.	.	.
cg18647449	0.498682	0.703716	-0.205034	7.69859e-09	6.20416e-08	chr10	132916718	132916719	CFAP46;CFAP46	protein_coding;protein_coding	ENST00000368586.8;ENST00000486104.4	25868;-35	CGI:chr10:132916294-132916518	S_Shore
cg12632411	0.567073	0.771864	-0.204791	5.2021e-05	6.42061e-05	chr20	17614710	17614711	RRBP1;RRBP1;RRBP1;RRBP1;RRBP1;RRBP1;RRBP1;RRBP1	protein_coding;protein_coding;protein_coding;protein_coding;protein_coding;protein_coding;protein_coding;protein_coding	ENST00000246043.7;ENST00000360807.7;ENST00000377807.5;ENST00000377813.4;ENST00000455029.3;ENST00000468428.1;ENST00000470422.4;ENST00000610403.3	45798;67586;67574;67524;67351;5108;8621;45264	CGI:chr20:17614626-17614838	Island
cg06911744	0.440628	0.645259	-0.204631	7.73172e-07	1.82629e-06	chr1	3359943	3359944	PRDM16;PRDM16;PRDM16;PRDM16;PRDM16;PRDM16	protein_coding;protein_coding;protein_coding;protein_coding;protein_coding;protein_coding	ENST00000270722.8;ENST00000378391.5;ENST00000463591.1;ENST00000511072.4;ENST00000512462.4;ENST00000514189.4	290731;290745;115810;290774;122011;290731	CGI:chr1:3358465-3358720	S_Shore
cg25941751	0.411043	0.615629	-0.204586	3.67711e-06	6.14346e-06	chr2	46386405	46386406	EPAS1;EPAS1	protein_coding;protein_coding	ENST00000263734.4;ENST00000466465.4	89002;6704	CGI:chr2:46296650-46300001	.
cg07804408	0.418532	0.623074	-0.204542	2.42429e-07	8.7402e-07	chr5	167097118	167097119	.	.	.	.	CGI:chr5:166978479-166978687	.
cg26504110	0.344647	0.549142	-0.204494	4.81597e-07	1.2937e-06	chr19	40624136	40624137	LTBP4;LTBP4;LTBP4;LTBP4;LTBP4;LTBP4;LTBP4;LTBP4;LTBP4	protein_coding;protein_coding;protein_coding;protein_coding;protein_coding;protein_coding;protein_coding;protein_coding;protein_coding	ENST00000204005.12;ENST00000243562.12;ENST00000308370.10;ENST00000318809.10;ENST00000396819.6;ENST00000595118.4;ENST00000597151.1;ENST00000599724.4;ENST00000601032.4	30969;14389;26900;10024;22764;10539;229;10687;12224	CGI:chr19:40623942-40624207	Island
cg14766621	0.518939	0.723405	-0.204467	0.000525058	0.000549106	chr2	1887285	1887286	MYT1L;MYT1L;MYT1L;MYT1L;MYT1L	protein_coding;protein_coding;protein_coding;protein_coding;protein_coding	ENST00000399161.5;ENST00000428368.5;ENST00000470954.1;ENST00000490585.1;ENST00000602387.4	443910;443832;221;15843;35446	CGI:chr2:1891925-1892160	.
cg11862144	0.37694	0.58095	-0.204009	5.5764e-07	1.44145e-06	chr18	63476728	63476729	SERPINB5;SERPINB5;SERPINB5	protein_coding;protein_coding;protein_coding	ENST00000382771.7;ENST00000424602.1;ENST00000489441.4	-34;-400;-231	CGI:chr18:63422029-63423124	.
cg26014281	0.45121	0.654661	-0.203451	2.22832e-06	4.29972e-06	chr7	157434532	157434533	.	.	.	.	CGI:chr7:157441419-157442548	.
cg07364009	0.632555	0.835586	-0.203031	0.00019268	0.000209501	chr16	48347594	48347595	LONP2;LONP2;LONP2;LONP2;LONP2;LONP2	protein_coding;protein_coding;protein_coding;protein_coding;protein_coding;protein_coding	ENST00000285737.7;ENST00000416006.6;ENST00000535754.4;ENST00000564259.1;ENST00000565867.2;ENST00000566755.4	103297;103238;103260;-503;13281;103205	CGI:chr16:48365819-48366129	.
cg06428425	0.587559	0.79038	-0.202822	6.46156e-07	1.60952e-06	*	-1	-1	.	.	.	.	.	.
cg05357660	0.634498	0.836988	-0.20249	0.00024888	0.000266379	chr6	105302706	105302707	PREP;RPL35P3	protein_coding;processed_pseudogene	ENST00000369110.6;ENST00000403133.1	100379;118	CGI:chr6:105402606-105403382	.
cg11617144	0.692564	0.895025	-0.202461	5.0059e-05	6.23462e-05	chr8	144504389	144504390	CTD-2517M22.14;CTD-2517M22.14;GPT;GPT;GPT;GPT;GPT;GPT;GPT	processed_transcript;processed_transcript;protein_coding;protein_coding;protein_coding;protein_coding;protein_coding;protein_coding;protein_coding	ENST00000527086.1;ENST00000528690.1;ENST00000354769.7;ENST00000394955.2;ENST00000527165.4;ENST00000527961.1;ENST00000528431.4;ENST00000531330.4;ENST00000534702.4	1056;710;248;306;651;167;1415;248;248	CGI:chr8:144505007-144509987	N_Shore
cg27097992	0.563866	0.766165	-0.202299	0.00019174	0.000209501	chr14	104334613	104334614	.	.	.	.	CGI:chr14:104334107-104334640	Island
cg19602728	0.289447	0.491609	-0.202162	8.32454e-09	6.3359e-08	chr4	1494607	1494608	.	.	.	.	CGI:chr4:1492815-1493026	S_Shore
cg23401796	0.609281	0.811163	-0.201882	0.000403574	0.000425305	chr8	140238568	140238569	TRAPPC9;TRAPPC9;TRAPPC9;TRAPPC9;TRAPPC9;TRAPPC9;TRAPPC9	protein_coding;protein_coding;protein_coding;protein_coding;protein_coding;protein_coding;protein_coding	ENST00000389328.7;ENST00000438773.2;ENST00000517667.4;ENST00000518839.1;ENST00000520532.4;ENST00000520857.4;ENST00000521667.4	220012;219195;-74;24163;24164;212363;52684	CGI:chr8:140338741-140339096	.
cg26583952	0.596096	0.797622	-0.201526	3.1912e-05	4.24461e-05	chr16	89905662	89905663	RP11-566K11.7;TCF25;TCF25;TCF25;TCF25;TCF25	processed_transcript;protein_coding;protein_coding;protein_coding;protein_coding;protein_coding	ENST00000570217.1;ENST00000263346.11;ENST00000263347.10;ENST00000562256.4;ENST00000563484.1;ENST00000570116.5	-496;32049;32075;21017;652;9671	CGI:chr16:89911154-89911443	.
cg11409350	0.556686	0.757068	-0.200383	1.09319e-05	1.59327e-05	chr17	75130404	75130405	NT5C;NT5C;NT5C;NT5C;NT5C;NT5C;NT5C;NT5C;RP11-649A18.3	protein_coding;protein_coding;protein_coding;protein_coding;protein_coding;protein_coding;protein_coding;protein_coding;TEC	ENST00000245552.5;ENST00000577523.4;ENST00000578407.4;ENST00000580423.4;ENST00000580758.4;ENST00000582160.4;ENST00000582744.4;ENST00000583655.4;ENST00000625094.1	1392;1022;1280;855;1340;1043;1070;1346;-480	CGI:chr17:75131101-75131900	N_Shore
cg13035219	0.364788	0.56509	-0.200302	4.53899e-07	1.2937e-06	chr7	1364168	1364169	.	.	.	.	CGI:chr7:1368880-1369671	.
cg15242225	0.429081	0.227976	0.201105	3.09179e-07	9.90185e-07	chr21	35049560	35049561	RUNX1;RUNX1;RUNX1;RUNX1;RUNX1;RUNX1	protein_coding;protein_coding;protein_coding;protein_coding;protein_coding;protein_coding	ENST00000300305.6;ENST00000416754.1;ENST00000437180.4;ENST00000455571.4;ENST00000475045.5;ENST00000482318.4	-215;-289;-261;-261;955108;-271	CGI:chr21:35026663-35026962	.
cg14967066	0.422716	0.221316	0.2014	7.98544e-06	1.21556e-05	chr11	314341	314342	IFITM1	protein_coding;protein_coding;protein_coding;protein_coding;protein_coding	ENST00000328221.5;ENST00000408968.3;ENST00000525554.1;ENST00000528780.4;ENST00000399815.2	813;487;-78;834;5932	CGI:chr11:315739-316539	N_Shore
cg19378330	0.367829	0.166181	0.201648	9.82161e-05	0.000114031	chr10	99846231	99846232	ABCC2	protein_coding	ENST00000370449.7	63498	CGI:chr10:99840130-99840469	.
cg08781140	0.566998	0.364417	0.202581	0.000144144	0.000160551	chr17	75588536	75588537	MYO15B	transcribed_unprocessed_pseudogene;transcribed_unprocessed_pseudogene;transcribed_unprocessed_pseudogene;transcribed_unprocessed_pseudogene	ENST00000584516.4;ENST00000610510.3;ENST00000619501.3;ENST00000621743.3	477;477;477;477	CGI:chr17:75587757-75590256	Island
cg03030717	0.527559	0.3244	0.203159	0.000374913	0.000398163	chr12	64824289	64824290	TBC1D30;TBC1D30;TBC1D30;TBC1D30;TBC1D30	protein_coding;protein_coding;protein_coding;protein_coding;protein_coding	ENST00000539120.1;ENST00000539867.4;ENST00000542120.4;ENST00000544190.4;ENST00000544457.1	-382;-284;38277;43094;-379	CGI:chr12:64824465-64825363	N_Shore
cg13656752	0.476272	0.265298	0.210975	1.63461e-06	3.29326e-06	chr5	172111330	172111331	STK10;STK10;STK10;STK10;STK10	protein_coding;protein_coding;protein_coding;protein_coding;protein_coding	ENST00000176763.8;ENST00000517381.1;ENST00000518267.4;ENST00000519710.1;ENST00000522936.4	77057;3471;3815;45396;3471	CGI:chr5:172055569-172055773	.
cg14186816	0.593323	0.38044	0.212883	2.89993e-11	8.90182e-10	chr18	58195531	58195532	NEDD4L;NEDD4L;NEDD4L;NEDD4L;NEDD4L;NEDD4L;NEDD4L;NEDD4L;NEDD4L;NEDD4L;NEDD4L;NEDD4L;NEDD4L;NEDD4L;NEDD4L;RP11-718I15.1;RP11-718I15.1	protein_coding;protein_coding;protein_coding;protein_coding;protein_coding;protein_coding;protein_coding;protein_coding;protein_coding;protein_coding;protein_coding;protein_coding;protein_coding;protein_coding;protein_coding;antisense;antisense	ENST00000256830.12;ENST00000356462.9;ENST00000357895.8;ENST00000382850.7;ENST00000400345.6;ENST00000435432.5;ENST00000456173.5;ENST00000456986.4;ENST00000585363.4;ENST00000586263.4;ENST00000588494.4;ENST00000588516.4;ENST00000589054.4;ENST00000591989.4;ENST00000592846.4;ENST00000586824.1;ENST00000593212.4	150869;151163;46197;150982;151152;46197;140;148304;149596;46193;-123;149167;151146;149841;149823;166;146	CGI:chr18:58195421-58195641	Island
cg04579966	0.365753	0.152223	0.21353	4.7484e-05	5.96817e-05	chr13	24272083	24272084	RP11-307N16.6;SPATA13;SPATA13;SPATA13;SPATA13;SPATA13;SPATA13;SPATA13;SPATA13;SPATA13;SPATA13	protein_coding;protein_coding;protein_coding;protein_coding;protein_coding;protein_coding;protein_coding;protein_coding;protein_coding;protein_coding;protein_coding	ENST00000382141.4;ENST00000343003.9;ENST00000382095.7;ENST00000382108.6;ENST00000399949.5;ENST00000409126.4;ENST00000424834.5;ENST00000434675.4;ENST00000454083.1;ENST00000488060.1;ENST00000494772.4	292382;1395;111334;111366;1394;1363;292277;20388;1241;-607;20364	CGI:chr13:24307960-24308727	.
cg00225623	0.445421	0.23127	0.214151	2.69766e-06	4.92773e-06	chr13	24271753	24271754	RP11-307N16.6;SPATA13;SPATA13;SPATA13;SPATA13;SPATA13;SPATA13;SPATA13;SPATA13;SPATA13;SPATA13	protein_coding;protein_coding;protein_coding;protein_coding;protein_coding;protein_coding;protein_coding;protein_coding;protein_coding;protein_coding;protein_coding	ENST00000382141.4;ENST00000343003.9;ENST00000382095.7;ENST00000382108.6;ENST00000399949.5;ENST00000409126.4;ENST00000424834.5;ENST00000434675.4;ENST00000454083.1;ENST00000488060.1;ENST00000494772.4	292052;1065;111004;111036;1064;1033;291947;20058;911;-937;20034	CGI:chr13:24307960-24308727	.
cg04915566	0.666038	0.449397	0.216641	4.31305e-06	7.11913e-06	chr21	35049175	35049176	RUNX1;RUNX1;RUNX1;RUNX1;RUNX1;RUNX1	protein_coding;protein_coding;protein_coding;protein_coding;protein_coding;protein_coding	ENST00000300305.6;ENST00000416754.1;ENST00000437180.4;ENST00000455571.4;ENST00000475045.5;ENST00000482318.4	170;96;124;124;955493;114	CGI:chr21:35026663-35026962	.
cg15245625	0.542617	0.321662	0.220955	3.63482e-12	2.48985e-10	chr18	58195444	58195445	NEDD4L;NEDD4L;NEDD4L;NEDD4L;NEDD4L;NEDD4L;NEDD4L;NEDD4L;NEDD4L;NEDD4L;NEDD4L;NEDD4L;NEDD4L;NEDD4L;NEDD4L;RP11-718I15.1;RP11-718I15.1	protein_coding;protein_coding;protein_coding;protein_coding;protein_coding;protein_coding;protein_coding;protein_coding;protein_coding;protein_coding;protein_coding;protein_coding;protein_coding;protein_coding;protein_coding;antisense;antisense	ENST00000256830.12;ENST00000356462.9;ENST00000357895.8;ENST00000382850.7;ENST00000400345.6;ENST00000435432.5;ENST00000456173.5;ENST00000456986.4;ENST00000585363.4;ENST00000586263.4;ENST00000588494.4;ENST00000588516.4;ENST00000589054.4;ENST00000591989.4;ENST00000592846.4;ENST00000586824.1;ENST00000593212.4	150782;151076;46110;150895;151065;46110;53;148217;149509;46106;-210;149080;151059;149754;149736;253;233	CGI:chr18:58195421-58195641	Island
cg00474080	0.360033	0.137076	0.222957	3.57192e-05	4.61654e-05	chr6	30955466	30955467	HCG21	antisense	ENST00000419481.1	-603	CGI:chr6:30955431-30955786	Island
cg22167353	0.506184	0.276564	0.22962	3.71181e-07	1.15572e-06	chr16	83995852	83995853	NECAB2;NECAB2;NECAB2;NECAB2	protein_coding;protein_coding;protein_coding;protein_coding	ENST00000305202.7;ENST00000565691.4;ENST00000566836.1;ENST00000567703.1	27219;24400;17306;2448	CGI:chr16:83995851-83996105	Island
cg04999352	0.53231	0.302475	0.229835	4.74097e-07	1.2937e-06	chr11	63537142	63537143	RARRES3;RARRES3;RARRES3;RARRES3;RARRES3	protein_coding;protein_coding;protein_coding;protein_coding;protein_coding	ENST00000255688.6;ENST00000354445.2;ENST00000439013.5;ENST00000537871.1;ENST00000544107.1	320;-1255;325;332;296	CGI:chr11:63490906-63491332	.
cg19836199	0.63111	0.400178	0.230932	7.74704e-08	3.68811e-07	chr21	35049644	35049645	RUNX1;RUNX1;RUNX1;RUNX1;RUNX1;RUNX1	protein_coding;protein_coding;protein_coding;protein_coding;protein_coding;protein_coding	ENST00000300305.6;ENST00000416754.1;ENST00000437180.4;ENST00000455571.4;ENST00000475045.5;ENST00000482318.4	-299;-373;-345;-345;955024;-355	CGI:chr21:35026663-35026962	.
cg15733882	0.535497	0.303926	0.231571	2.19576e-10	4.29742e-09	chr18	58195395	58195396	NEDD4L;NEDD4L;NEDD4L;NEDD4L;NEDD4L;NEDD4L;NEDD4L;NEDD4L;NEDD4L;NEDD4L;NEDD4L;NEDD4L;NEDD4L;NEDD4L;NEDD4L;RP11-718I15.1;RP11-718I15.1	protein_coding;protein_coding;protein_coding;protein_coding;protein_coding;protein_coding;protein_coding;protein_coding;protein_coding;protein_coding;protein_coding;protein_coding;protein_coding;protein_coding;protein_coding;antisense;antisense	ENST00000256830.12;ENST00000356462.9;ENST00000357895.8;ENST00000382850.7;ENST00000400345.6;ENST00000435432.5;ENST00000456173.5;ENST00000456986.4;ENST00000585363.4;ENST00000586263.4;ENST00000588494.4;ENST00000588516.4;ENST00000589054.4;ENST00000591989.4;ENST00000592846.4;ENST00000586824.1;ENST00000593212.4	150733;151027;46061;150846;151016;46061;4;148168;149460;46057;-259;149031;151010;149705;149687;302;282	CGI:chr18:58195421-58195641	N_Shore
cg02370667	0.51403	0.272347	0.241683	2.79638e-07	9.5776e-07	chr16	83995906	83995907	NECAB2;NECAB2;NECAB2;NECAB2	protein_coding;protein_coding;protein_coding;protein_coding	ENST00000305202.7;ENST00000565691.4;ENST00000566836.1;ENST00000567703.1	27273;24454;17360;2502	CGI:chr16:83995851-83996105	Island
cg08443845	0.676005	0.427059	0.248945	1.05481e-07	4.66158e-07	chr21	35049658	35049659	RUNX1;RUNX1;RUNX1;RUNX1;RUNX1;RUNX1	protein_coding;protein_coding;protein_coding;protein_coding;protein_coding;protein_coding	ENST00000300305.6;ENST00000416754.1;ENST00000437180.4;ENST00000455571.4;ENST00000475045.5;ENST00000482318.4	-313;-387;-359;-359;955010;-369	CGI:chr21:35026663-35026962	.
cg22524657	0.714017	0.4634	0.250617	1.9028e-12	2.48985e-10	chr1	47533491	47533492	.	.	.	.	CGI:chr1:47533238-47533555	Island
cg06632214	0.40561	0.146468	0.259142	2.08886e-05	2.92014e-05	chr11	314074	314075	IFITM1	protein_coding;protein_coding;protein_coding;protein_coding;protein_coding	ENST00000328221.5;ENST00000408968.3;ENST00000525554.1;ENST00000528780.4;ENST00000399815.2	546;220;-345;567;5665	CGI:chr11:315739-316539	N_Shore
cg25693302	0.530126	0.254692	0.275434	3.24884e-11	8.90182e-10	chr18	58195446	58195447	NEDD4L;NEDD4L;NEDD4L;NEDD4L;NEDD4L;NEDD4L;NEDD4L;NEDD4L;NEDD4L;NEDD4L;NEDD4L;NEDD4L;NEDD4L;NEDD4L;NEDD4L;RP11-718I15.1;RP11-718I15.1	protein_coding;protein_coding;protein_coding;protein_coding;protein_coding;protein_coding;protein_coding;protein_coding;protein_coding;protein_coding;protein_coding;protein_coding;protein_coding;protein_coding;protein_coding;antisense;antisense	ENST00000256830.12;ENST00000356462.9;ENST00000357895.8;ENST00000382850.7;ENST00000400345.6;ENST00000435432.5;ENST00000456173.5;ENST00000456986.4;ENST00000585363.4;ENST00000586263.4;ENST00000588494.4;ENST00000588516.4;ENST00000589054.4;ENST00000591989.4;ENST00000592846.4;ENST00000586824.1;ENST00000593212.4	150784;151078;46112;150897;151067;46112;55;148219;149511;46108;-208;149082;151061;149756;149738;251;231	CGI:chr18:58195421-58195641	Island
