# Supplementary material for: Integrated data analysis reveals significant associations of KEAP1 mutations with DNA methylation alterations in lung adenocarcinomas
Source: Aging (Albany NY). 2020 Apr 23;12(8):7183–206. doi: 10.18632/aging.103068 (PMC7202502; doi:10.18632/aging.103068)
Supplement: Supplementary File 4 [file aging-12-103068-s010..xlsx]

## Sheet: Sheet1
KEAP1.MUT vs Normal (delta β-value > |0.2| and P value < 0.05 )
Probe	Beta value_Keap1 mutated_mean2	Beta value_normal _mean2	Delta beta value	P_values	q-value	Chromosome	Start	End	Gene_Symbol	Gene_Type	Transcript_ID	Position_to_TSS	CGI_Coordinate	Feature_Type
cg26479667	0.332908	0.860506	-0.527598	1.81283e-17	7.03426e-20	chr5	3339467	3339468	.	.	.	.	CGI:chr5:3326214-3326531	.
cg02772121	0.306519	0.833294	-0.526775	1.71674e-22	3.19853e-24	chr6	30163104	30163105	TRIM15;TRIM15;TRIM15	protein_coding;protein_coding;protein_coding	ENST00000376688.2;ENST00000376694.7;ENST00000619857.3	-582;-113;-103	CGI:chr6:30171941-30172486	.
cg25714865	0.342614	0.863834	-0.521221	3.73563e-16	9.91635e-19	chr7	5608491	5608492	.	.	.	.	CGI:chr7:5608026-5608353	S_Shore
cg24337215	0.430119	0.945067	-0.514947	5.21945e-13	5.86738e-16	chr1	155912153	155912154	RIT1;RIT1;RIT1;RIT1;RIT1;RIT1	protein_coding;protein_coding;protein_coding;protein_coding;protein_coding;protein_coding	ENST00000368322.6;ENST00000368323.6;ENST00000461050.4;ENST00000462687.1;ENST00000539040.4;ENST00000609492.1	-1237;-748;-808;-1361;-750;-1271	CGI:chr1:155934281-155934516	.
cg11862144	0.37694	0.886894	-0.509953	3.2855e-17	1.18062e-19	chr18	63476728	63476729	SERPINB5;SERPINB5;SERPINB5	protein_coding;protein_coding;protein_coding	ENST00000382771.7;ENST00000424602.1;ENST00000489441.4	-34;-400;-231	CGI:chr18:63422029-63423124	.
cg14557064	0.320364	0.824631	-0.504267	4.58803e-21	5.1884e-23	chr5	1752725	1752726	.	.	.	.	CGI:chr5:1746254-1746935	.
cg20151476	0.364019	0.863429	-0.499409	7.74998e-16	1.89637e-18	chr7	1567772	1567773	PSMG3;PSMG3;PSMG3	protein_coding;protein_coding;protein_coding	ENST00000252329.3;ENST00000288607.2;ENST00000404674.6	3234;2222;2274	CGI:chr7:1569789-1570401	N_Shelf
cg21711862	0.332985	0.82977	-0.496785	4.53079e-23	1.03308e-24	chr2	554363	554364	.	.	.	.	CGI:chr2:558069-558469	N_Shelf
cg19602728	0.289447	0.785662	-0.496215	1.18713e-20	1.18162e-22	chr4	1494607	1494608	.	.	.	.	CGI:chr4:1492815-1493026	S_Shore
cg04708126	0.459461	0.954668	-0.495207	1.35981e-11	1.05669e-14	chr13	113065126	113065127	MCF2L;MCF2L;MCF2L;MCF2L;MCF2L;MCF2L;MCF2L;MCF2L;MCF2L	protein_coding;protein_coding;protein_coding;protein_coding;protein_coding;protein_coding;protein_coding;protein_coding;protein_coding	ENST00000375597.7;ENST00000375604.5;ENST00000375608.6;ENST00000397030.4;ENST00000421756.4;ENST00000423251.1;ENST00000464800.4;ENST00000475524.1;ENST00000535094.5	63371;63411;170747;96625;85813;20274;813;435;95904	CGI:chr13:113067206-113067893	N_Shelf
cg09170112	0.415634	0.906298	-0.490664	1.8056e-15	3.99091e-18	chr12	131617643	131617644	.	.	.	.	CGI:chr12:131661159-131662265	.
cg07044458	0.334191	0.822694	-0.488503	1.1039e-21	1.58346e-23	chr7	4712353	4712354	FOXK1	protein_coding	ENST00000328914.4	30043	CGI:chr7:4718171-4718406	.
cg14215310	0.408826	0.896098	-0.487272	1.52761e-16	4.49108e-19	chr8	1466022	1466023	.	.	.	.	CGI:chr8:1456718-1456928	.
cg21974506	0.297601	0.779674	-0.482073	8.8233e-28	1.40371e-28	chr6	33173514	33173515	COL11A2;COL11A2;COL11A2;COL11A2	protein_coding;protein_coding;protein_coding;protein_coding	ENST00000341947.5;ENST00000361917.4;ENST00000374708.7;ENST00000477772.1	18955;18955;18986;4380	CGI:chr6:33161514-33161941	.
cg03217915	0.49037	0.972325	-0.481955	6.23899e-10	3.27016e-13	*	-1	-1	.	.	.	.	.	.
cg23230478	0.442994	0.921703	-0.478708	1.03458e-10	6.49279e-14	chr1	6300560	6300561	ACOT7;ACOT7;ACOT7;ACOT7;ACOT7;ACOT7;ACOT7;ACOT7;ACOT7	protein_coding;protein_coding;protein_coding;protein_coding;protein_coding;protein_coding;protein_coding;protein_coding;protein_coding	ENST00000361521.7;ENST00000377842.6;ENST00000377845.6;ENST00000377855.5;ENST00000377860.7;ENST00000418124.4;ENST00000473466.2;ENST00000545482.4;ENST00000608083.4	93832;58785;60148;85254;92802;92802;51690;93207;92802	CGI:chr1:6281076-6281352	.
cg07661904	0.373972	0.852493	-0.47852	2.06926e-18	1.05421e-20	chr10	70171243	70171244	SAR1A;SAR1A;SAR1A	protein_coding;protein_coding;protein_coding	ENST00000373239.2;ENST00000373241.7;ENST00000373242.5	-730;-719;-719	CGI:chr10:70170251-70170831	S_Shore
cg14940871	0.274237	0.748984	-0.474746	1.20179e-16	3.65603e-19	chr18	79626828	79626829	.	.	.	.	CGI:chr18:79626827-79627050	Island
cg05174942	0.382376	0.855819	-0.473444	2.555e-17	9.50824e-20	chr5	140718807	140718808	VTRNA1-2	misc_RNA	ENST00000365241.1	-119	CGI:chr5:140691219-140691743	.
cg02495552	0.417296	0.890091	-0.472795	2.22877e-15	4.77545e-18	chr12	131737124	131737125	SFSWAP;SFSWAP;SFSWAP;SFSWAP;SFSWAP	protein_coding;protein_coding;protein_coding;protein_coding;protein_coding	ENST00000261674.7;ENST00000535202.1;ENST00000535236.4;ENST00000538548.4;ENST00000541286.4	26034;10134;26023;26033;25986	CGI:chr12:131734782-131734994	S_Shelf
cg08063051	0.309975	0.782035	-0.47206	5.03241e-19	3.04977e-21	chr16	1378705	1378706	UNKL;UNKL;UNKL;UNKL;UNKL;UNKL;UNKL;UNKL	protein_coding;protein_coding;protein_coding;protein_coding;protein_coding;protein_coding;protein_coding;protein_coding	ENST00000248104.10;ENST00000389221.7;ENST00000397464.4;ENST00000402641.5;ENST00000403703.4;ENST00000508903.5;ENST00000513783.1;ENST00000515195.1	979;36016;979;976;941;35987;417;472	CGI:chr16:1379049-1380103	N_Shore
cg14543676	0.41489	0.882296	-0.467407	2.78995e-14	4.36612e-17	chr2	132417809	132417810	GPR39;GPR39	protein_coding;protein_coding	ENST00000329321.3;ENST00000622084.1	1234;765	CGI:chr2:132417587-132417871	Island
cg11201447	0.23384	0.701049	-0.467208	1.84228e-19	1.28799e-21	chr8	127795817	127795818	MIR1204;PVT1;PVT1;PVT1;PVT1;PVT1;PVT1;PVT1;PVT1;PVT1;PVT1	miRNA;lincRNA;lincRNA;lincRNA;lincRNA;lincRNA;lincRNA;lincRNA;lincRNA;lincRNA;lincRNA	ENST00000408388.1;ENST00000504719.5;ENST00000517525.1;ENST00000517790.1;ENST00000518528.1;ENST00000521951.1;ENST00000522963.4;ENST00000523068.1;ENST00000523328.4;ENST00000523427.1;ENST00000524165.4	-146;1283;1256;62;-4;1259;3;-217;1259;1241;1259	CGI:chr8:127793835-127794653	S_Shore
cg13261536	0.490982	0.956918	-0.465937	1.31323e-11	1.02345e-14	chr8	143261745	143261746	ZFP41;ZFP41;ZFP41	protein_coding;protein_coding;protein_coding	ENST00000330701.5;ENST00000522452.1;ENST00000626353.1	14816;14634;14816	CGI:chr8:143261617-143262144	Island
cg23270529	0.360436	0.821835	-0.461399	2.62711e-10	1.49766e-13	chr1	243421366	243421367	SDCCAG8;SDCCAG8;SDCCAG8	protein_coding;protein_coding;protein_coding	ENST00000366541.6;ENST00000435549.1;ENST00000463042.1	165309;134982;3348	CGI:chr1:243474337-243474840	.
cg01221209	0.482082	0.937771	-0.455689	1.70083e-12	1.66398e-15	chr5	554771	554772	.	.	.	.	CGI:chr5:554708-555217	Island
cg00241002	0.263518	0.71822	-0.454701	3.3531e-21	4.0726e-23	chr10	26642983	26642984	RP13-16H11.7	lincRNA	ENST00000454991.1	-246	CGI:chr10:26697213-26698159	.
cg15300436	0.32517	0.779795	-0.454624	7.37637e-19	4.25326e-21	chr2	2318016	2318017	MYT1L;MYT1L;MYT1L;MYT1L;MYT1L;MYT1L-AS1;MYT1L-AS1	protein_coding;protein_coding;protein_coding;protein_coding;protein_coding;antisense;antisense	ENST00000399161.5;ENST00000428368.5;ENST00000460585.1;ENST00000476547.1;ENST00000479156.1;ENST00000422175.1;ENST00000448106.1	13179;13101;13245;8539;6520;-1217;-1229	CGI:chr2:2189738-2189944	.
cg07834841	0.408537	0.860467	-0.45193	1.36592e-16	4.07911e-19	chr10	128387078	128387079	.	.	.	.	CGI:chr10:128286774-128287161	.
cg15167871	0.49349	0.944359	-0.450869	1.55852e-11	1.19427e-14	chr10	131093108	131093109	TCERG1L;TCERG1L	protein_coding;protein_coding	ENST00000368642.4;ENST00000483040.1	218614;167229	CGI:chr10:131095165-131095425	N_Shelf
cg05943574	0.457008	0.902984	-0.445976	2.85538e-15	5.91876e-18	chr1	248522081	248522082	OR2G6	protein_coding	ENST00000343414.5	433	CGI:chr1:248691729-248692169	.
cg22418337	0.361117	0.806345	-0.445228	1.77324e-27	2.38895e-28	chr5	2114993	2114994	.	.	.	.	CGI:chr5:2111722-2112370	S_Shelf
cg01890568	0.346267	0.79123	-0.444963	2.10121e-15	4.54431e-18	chr17	33110631	33110632	ASIC2;ASIC2;ASIC2;RP11-40A13.1	protein_coding;protein_coding;protein_coding;antisense	ENST00000225823.5;ENST00000359872.6;ENST00000448983.1;ENST00000584688.1	182358;1046664;180811;-1228	CGI:chr17:33291327-33293447	.
cg00157656	0.447804	0.8923	-0.444496	2.5907e-18	1.29535e-20	chr8	694663	694664	ERICH1;ERICH1;ERICH1;ERICH1	protein_coding;protein_coding;protein_coding;protein_coding	ENST00000262109.7;ENST00000518277.1;ENST00000522706.4;ENST00000524138.4	36577;43444;36535;21265	CGI:chr8:699637-700596	.
cg16678111	0.436569	0.880397	-0.443828	1.10799e-14	1.93525e-17	chr1	3002160	3002161	.	.	.	.	CGI:chr1:3001801-3002189	Island
cg05754905	0.418932	0.8625	-0.443567	6.09389e-20	4.88069e-22	chr1	161022562	161022563	F11R;F11R;F11R;F11R;F11R;RP11-544M22.13;RP11-544M22.13	protein_coding;protein_coding;protein_coding;protein_coding;protein_coding;protein_coding;protein_coding	ENST00000335772.3;ENST00000368026.9;ENST00000537746.1;ENST00000602966.1;ENST00000621309.3;ENST00000289779.6;ENST00000470694.1	-1418;-1213;-1465;-1386;-1218;16383;16401	CGI:chr1:161020928-161021435	S_Shore
cg05353872	0.374066	0.817063	-0.442997	1.104e-15	2.58289e-18	chr1	248203097	248203098	OR2M3	protein_coding	ENST00000456743.2	28	CGI:chr1:247937023-247937424	.
cg08482501	0.41703	0.858842	-0.441812	1.21248e-20	1.20218e-22	chr20	5302306	5302307	PROKR2	protein_coding	ENST00000217270.3	12064	CGI:chr20:5302189-5302416	Island
cg19752861	0.440777	0.881765	-0.440988	3.04014e-15	6.26464e-18	chr2	73926086	73926087	DGUOK;DGUOK;DGUOK;DGUOK;DGUOK;DGUOK;DGUOK;DGUOK	protein_coding;protein_coding;protein_coding;protein_coding;protein_coding;protein_coding;protein_coding;protein_coding	ENST00000264093.7;ENST00000348222.2;ENST00000418996.4;ENST00000462551.1;ENST00000462685.1;ENST00000489796.4;ENST00000493055.1;ENST00000629438.1	-741;-741;-790;-808;-812;-809;-823;-741	CGI:chr2:73926726-73927154	N_Shore
cg19907968	0.434911	0.875459	-0.440548	4.83388e-16	1.24585e-18	chr7	1520962	1520963	.	.	.	.	CGI:chr7:1530584-1531500	.
cg07077277	0.434128	0.872819	-0.43869	3.32253e-09	1.4904e-12	chr6	25726684	25726685	HIST1H2AA;HIST1H2BA	protein_coding;protein_coding	ENST00000297012.4;ENST00000274764.3	-156;-226	CGI:chr6:25726226-25726494	S_Shore
cg16384355	0.490143	0.928828	-0.438685	4.94191e-16	1.26995e-18	chr7	157527822	157527823	.	.	.	.	CGI:chr7:157527768-157527975	Island
cg19757573	0.381181	0.818941	-0.43776	6.90049e-14	9.68976e-17	chr14	101039909	101039910	AL132709.6;AL132709.9;MIR300;MIR376B;MIR654	miRNA;miRNA;miRNA;miRNA;miRNA	ENST00000616574.1;ENST00000631287.1;ENST00000401138.1;ENST00000614515.1;ENST00000385199.1	-847;-144;-1455;-519;-311	CGI:chr14:101065306-101066047	.
cg13904520	0.366645	0.804142	-0.437497	2.51822e-18	1.26181e-20	chr1	160813264	160813265	LY9;LY9;LY9;LY9;LY9;LY9;LY9	protein_coding;protein_coding;protein_coding;protein_coding;protein_coding;protein_coding;protein_coding	ENST00000263285.9;ENST00000368035.1;ENST00000368037.8;ENST00000392203.7;ENST00000471816.1;ENST00000479663.2;ENST00000480837.4	17105;-1260;17189;17151;17055;3514;17064	CGI:chr1:160801893-160802163	.
cg17163729	0.299008	0.734609	-0.435601	6.55906e-22	9.95953e-24	chr2	554372	554373	.	.	.	.	CGI:chr2:558069-558469	N_Shelf
cg07554986	0.443309	0.877907	-0.434598	3.75689e-13	4.3772e-16	chr7	4712275	4712276	FOXK1	protein_coding	ENST00000328914.4	29965	CGI:chr7:4718171-4718406	.
cg05970721	0.437395	0.87116	-0.433765	2.42546e-12	2.28049e-15	chr16	22915304	22915305	HS3ST2;HS3ST2	protein_coding;protein_coding	ENST00000261374.3;ENST00000473392.1	101126;100806	CGI:chr16:22915022-22915318	Island
cg19928493	0.383899	0.817206	-0.433306	8.89785e-18	3.77256e-20	chr15	87124159	87124160	.	.	.	.	CGI:chr15:88255423-88255783	.
cg19991916	0.501219	0.933405	-0.432186	1.69307e-09	8.09571e-13	chr15	55318426	55318427	PIGB;PIGB;PIGB;PIGB;PIGB;PIGB;PIGB;PIGBOS1;PIGBOS1;PIGBOS1;RAB27A;RAB27A	protein_coding;protein_coding;protein_coding;protein_coding;protein_coding;protein_coding;protein_coding;protein_coding;protein_coding;protein_coding;protein_coding;protein_coding	ENST00000164305.8;ENST00000539642.4;ENST00000565367.4;ENST00000566072.1;ENST00000566999.4;ENST00000569909.1;ENST00000570059.1;ENST00000436697.2;ENST00000565225.1;ENST00000567948.1;ENST00000561545.1;ENST00000563262.4	-535;-826;-535;-848;-820;-807;-807;620;682;736;685;688	CGI:chr15:55318887-55319410	N_Shore
cg06719334	0.381067	0.812072	-0.431004	4.18873e-19	2.62499e-21	chr16	7451307	7451308	RBFOX1;RBFOX1;RBFOX1;RBFOX1;RBFOX1;RBFOX1;RBFOX1;RBFOX1;RBFOX1;RBFOX1;RBFOX1;RBFOX1;RBFOX1;RBFOX1;RBFOX1	protein_coding;protein_coding;protein_coding;protein_coding;protein_coding;protein_coding;protein_coding;protein_coding;protein_coding;protein_coding;protein_coding;protein_coding;protein_coding;protein_coding;protein_coding	ENST00000311745.8;ENST00000340209.7;ENST00000355637.7;ENST00000422070.7;ENST00000436368.5;ENST00000535565.5;ENST00000547338.4;ENST00000547372.4;ENST00000547605.4;ENST00000550418.4;ENST00000551752.4;ENST00000552089.4;ENST00000553186.4;ENST00000569889.1;ENST00000620507.3	118556;118556;118556;1431603;118556;968127;677497;1431713;1432212;1432175;967513;967920;1432175;28528;118556	CGI:chr16:7518193-7518411	.
cg26429674	0.454084	0.884952	-0.430867	1.37541e-13	1.79557e-16	chr20	61895211	61895212	CDH4;CDH4;CDH4	protein_coding;protein_coding;protein_coding	ENST00000543233.2;ENST00000611855.3;ENST00000614565.3	295449;325075;642784	CGI:chr20:61895024-61895279	Island
cg02567289	0.398358	0.828914	-0.430556	2.22176e-19	1.50409e-21	chr1	247641953	247641954	RP11-634B7.4;RP11-634B7.4;RP11-978I15.10	antisense;antisense;antisense	ENST00000449298.1;ENST00000582218.1;ENST00000435333.4	2203;1903;-1098	CGI:chr1:247639436-247639839	S_Shelf
cg04214938	0.429028	0.859363	-0.430335	6.51197e-15	1.21622e-17	chr2	118738595	118738596	.	.	.	.	CGI:chr2:118774489-118774739	.
cg19483465	0.429523	0.859631	-0.430108	1.41803e-12	1.41945e-15	chr12	132320353	132320354	GALNT9;GALNT9	protein_coding;protein_coding	ENST00000328957.11;ENST00000424720.5	8851;8997	CGI:chr12:132319713-132319983	S_Shore
cg04806177	0.496089	0.9259	-0.429811	1.22334e-12	1.24287e-15	chr16	1941446	1941447	MSRB1;MSRB1;MSRB1;MSRB1;MSRB1;MSRB1	protein_coding;protein_coding;protein_coding;protein_coding;protein_coding;protein_coding	ENST00000361871.6;ENST00000399753.2;ENST00000473663.1;ENST00000489198.1;ENST00000564908.1;ENST00000622125.3	1881;1750;1678;494;1754;1848	CGI:chr16:1942667-1943645	N_Shore
cg23643466	0.466099	0.895674	-0.429575	4.07975e-12	3.63059e-15	chr10	130486642	130486643	.	.	.	.	CGI:chr10:130567421-130567717	.
cg06966242	0.461537	0.889759	-0.428222	7.10424e-15	1.31525e-17	chr1	4772372	4772373	AJAP1;AJAP1	protein_coding;protein_coding	ENST00000378190.6;ENST00000378191.4	117639;117326	CGI:chr1:4772291-4772493	Island
cg25247520	0.320306	0.748402	-0.428096	6.84243e-19	3.98809e-21	chr8	127795771	127795772	MIR1204;PVT1;PVT1;PVT1;PVT1;PVT1;PVT1;PVT1;PVT1;PVT1;PVT1	miRNA;lincRNA;lincRNA;lincRNA;lincRNA;lincRNA;lincRNA;lincRNA;lincRNA;lincRNA;lincRNA	ENST00000408388.1;ENST00000504719.5;ENST00000517525.1;ENST00000517790.1;ENST00000518528.1;ENST00000521951.1;ENST00000522963.4;ENST00000523068.1;ENST00000523328.4;ENST00000523427.1;ENST00000524165.4	-192;1237;1210;16;-50;1213;-43;-263;1213;1195;1213	CGI:chr8:127793835-127794653	S_Shore
cg04923174	0.345962	0.772776	-0.426814	3.59591e-21	4.3028e-23	chr1	158579487	158579488	OR10X1;OR10X1;OR10X1	polymorphic_pseudogene;polymorphic_pseudogene;protein_coding	ENST00000623167.1;ENST00000625122.1;ENST00000368150.1	413;413;413	CGI:chr1:158180830-158181713	.
cg07333231	0.499214	0.925822	-0.426607	1.97164e-11	1.47231e-14	chr8	1101728	1101729	ERICH1-AS1;ERICH1-AS1	antisense;antisense	ENST00000522092.4;ENST00000578889.1	364076;218399	CGI:chr8:1101641-1101896	Island
cg16325826	0.47746	0.90399	-0.42653	2.65557e-13	3.20555e-16	chr13	113064822	113064823	MCF2L;MCF2L;MCF2L;MCF2L;MCF2L;MCF2L;MCF2L;MCF2L;MCF2L	protein_coding;protein_coding;protein_coding;protein_coding;protein_coding;protein_coding;protein_coding;protein_coding;protein_coding	ENST00000375597.7;ENST00000375604.5;ENST00000375608.6;ENST00000397030.4;ENST00000421756.4;ENST00000423251.1;ENST00000464800.4;ENST00000475524.1;ENST00000535094.5	63067;63107;170443;96321;85509;19970;509;131;95600	CGI:chr13:113067206-113067893	N_Shelf
cg26238975	0.511576	0.937848	-0.426272	1.00601e-09	5.0546e-13	chr14	101054325	101054326	AL132709.5;MIR134;MIR382;MIR485	miRNA;miRNA;miRNA;miRNA	ENST00000611970.1;ENST00000385258.3;ENST00000385009.2;ENST00000385292.3	-905;-363;62;-1083	CGI:chr14:101065306-101066047	.
cg06550539	0.497766	0.923649	-0.425884	1.71785e-16	4.98547e-19	chr10	132885433	132885434	CFAP46	protein_coding	ENST00000368586.8	57153	CGI:chr10:132885149-132885464	Island
cg06552160	0.32249	0.748182	-0.425692	2.7784e-25	1.44065e-26	chr2	1922952	1922953	MYT1L;MYT1L;MYT1L	protein_coding;protein_coding;protein_coding	ENST00000399161.5;ENST00000428368.5;ENST00000602387.4	408243;408165;-221	CGI:chr2:1937296-1937788	.
cg14715697	0.460978	0.885997	-0.425019	1.74758e-08	6.87289e-12	chr17	79131405	79131406	RBFOX3;RBFOX3;RBFOX3;RBFOX3;RBFOX3;RBFOX3;RP11-398J5.1	protein_coding;protein_coding;protein_coding;protein_coding;protein_coding;protein_coding;antisense	ENST00000580155.4;ENST00000580508.1;ENST00000582043.4;ENST00000582139.1;ENST00000583458.4;ENST00000584778.4;ENST00000583980.1	384744;52068;104401;77152;351194;377464;-1318	CGI:chr17:79131323-79131524	Island
cg05309505	0.525296	0.949253	-0.423957	8.64039e-13	9.15573e-16	chr11	612837	612838	IRF7;IRF7;IRF7;IRF7;IRF7;IRF7;IRF7;IRF7;IRF7;IRF7;IRF7	protein_coding;protein_coding;protein_coding;protein_coding;protein_coding;protein_coding;protein_coding;protein_coding;protein_coding;protein_coding;protein_coding	ENST00000330243.8;ENST00000348655.9;ENST00000397566.4;ENST00000397570.4;ENST00000397574.5;ENST00000469048.4;ENST00000525445.4;ENST00000528413.4;ENST00000531912.1;ENST00000532326.4;ENST00000533182.4	3134;2814;2892;2892;3163;2814;2790;1018;755;3147;3114	CGI:chr11:611691-611943	S_Shore
cg02579140	0.543213	0.966248	-0.423034	2.34588e-08	9.03518e-12	chr10	3118790	3118791	PFKP;PFKP;PFKP	protein_coding;protein_coding;protein_coding	ENST00000381075.5;ENST00000381125.7;ENST00000413079.1	50162;51269;5331	CGI:chr10:3118696-3118915	Island
cg25783892	0.413434	0.836429	-0.422995	4.50185e-22	7.2112e-24	chr10	84138893	84138894	GHITM;GHITM;RP11-338I21.1	protein_coding;protein_coding;antisense	ENST00000372134.4;ENST00000618907.3;ENST00000606511.1	-548;-610;1690	CGI:chr10:84139302-84139884	N_Shore
cg19212949	0.381096	0.803554	-0.422459	1.4581e-13	1.89083e-16	chr19	56812472	56812473	PEG3;PEG3;ZIM2;ZIM2;ZIM2;ZIM2;ZIM2;ZIM2	protein_coding;protein_coding;protein_coding;protein_coding;protein_coding;protein_coding;protein_coding;protein_coding	ENST00000326441.12;ENST00000599565.1;ENST00000593711.4;ENST00000595671.4;ENST00000597281.4;ENST00000599935.4;ENST00000601070.4;ENST00000629319.1	28225;-1188;28236;23607;23607;28258;23607;28258	CGI:chr19:56795314-56795664	.
cg16104371	0.441908	0.864012	-0.422104	7.91382e-17	2.54039e-19	chr4	1536798	1536799	.	.	.	.	CGI:chr4:1537050-1537310	N_Shore
cg21908886	0.307092	0.728976	-0.421884	1.85601e-26	1.47637e-27	chr1	166070207	166070208	FAM78B;FAM78B;FAM78B;FAM78B;FAM78B	protein_coding;protein_coding;protein_coding;protein_coding;protein_coding	ENST00000338353.3;ENST00000354422.3;ENST00000435676.2;ENST00000441649.1;ENST00000456900.1	96763;96509;96019;96028;96175	CGI:chr1:166165021-166167211	.
cg06074146	0.473652	0.895502	-0.42185	2.47744e-12	2.32187e-15	chr13	20724310	20724311	.	.	.	.	CGI:chr13:20721472-20722299	S_Shelf
cg18096251	0.432115	0.85335	-0.421235	1.53664e-09	7.406e-13	chr5	2205439	2205440	.	.	.	.	CGI:chr5:2180137-2180353	.
cg18496841	0.502429	0.923061	-0.420631	1.08173e-11	8.6076e-15	chr8	1546859	1546860	DLGAP2;DLGAP2	protein_coding;protein_coding	ENST00000421627.5;ENST00000612087.1	45492;45492	CGI:chr8:1546939-1547167	N_Shore
cg09050058	0.298857	0.719262	-0.420405	2.31553e-26	1.72433e-27	chr5	2186742	2186743	.	.	.	.	CGI:chr5:2180137-2180353	.
cg04004158	0.239728	0.65977	-0.420041	4.33154e-17	1.50252e-19	chr16	1102474	1102475	.	.	.	.	CGI:chr16:1102947-1103355	N_Shore
cg25528121	0.446351	0.865643	-0.419292	5.13881e-15	9.87419e-18	chr3	14819286	14819287	FGD5;FGD5	protein_coding;protein_coding	ENST00000285046.8;ENST00000543601.4	323;323	CGI:chr3:14810712-14811587	.
cg12706330	0.405924	0.824008	-0.418084	6.6472e-21	7.08225e-23	chr10	84138944	84138945	GHITM;GHITM;RP11-338I21.1	protein_coding;protein_coding;antisense	ENST00000372134.4;ENST00000618907.3;ENST00000606511.1	-497;-559;1639	CGI:chr10:84139302-84139884	N_Shore
cg05465955	0.390864	0.808735	-0.417871	1.40712e-19	1.01336e-21	chr17	42563218	42563219	COASY;COASY;COASY;COASY;COASY;COASY;COASY	protein_coding;protein_coding;protein_coding;protein_coding;protein_coding;protein_coding;protein_coding	ENST00000393818.2;ENST00000421097.5;ENST00000586771.1;ENST00000588353.1;ENST00000590958.4;ENST00000591753.1;ENST00000591779.4	1050;1070;1075;-798;1066;-90;1069	CGI:chr17:42562069-42563264	Island
cg01395254	0.385824	0.802219	-0.416394	8.00472e-16	1.95305e-18	chr2	2332656	2332657	MYT1L;MYT1L	protein_coding;protein_coding	ENST00000399161.5;ENST00000460585.1	-1461;-1395	CGI:chr2:2189738-2189944	.
cg19324997	0.552029	0.968344	-0.416315	8.69034e-12	7.10825e-15	chr2	239247465	239247466	HDAC4;HDAC4;HDAC4;HDAC4;HDAC4;HDAC4;HDAC4	protein_coding;protein_coding;protein_coding;protein_coding;protein_coding;protein_coding;protein_coding	ENST00000345617.6;ENST00000446876.1;ENST00000463007.4;ENST00000493582.4;ENST00000535493.4;ENST00000543185.4;ENST00000544989.1	153485;61748;51175;154190;51066;153485;153547	CGI:chr2:239231780-239232096	.
cg25225379	0.447165	0.86348	-0.416315	1.73867e-11	1.3149e-14	chr8	142427902	142427903	.	.	.	.	CGI:chr8:142428011-142428269	N_Shore
cg06807993	0.460547	0.876613	-0.416066	9.49929e-15	1.69673e-17	chr17	81125985	81125986	AATK;AATK;AATK;AATK;AATK;AATK;AC115099.1;MIR657	protein_coding;protein_coding;protein_coding;protein_coding;protein_coding;protein_coding;miRNA;miRNA	ENST00000326724.7;ENST00000374792.5;ENST00000417379.4;ENST00000572339.4;ENST00000573441.1;ENST00000573469.1;ENST00000390137.3;ENST00000385003.1	40033;40088;5964;2904;-970;2916;-6;-611	CGI:chr17:81128948-81129170	N_Shelf
cg17551002	0.371834	0.787082	-0.415247	9.06644e-21	9.26498e-23	chr1	158548059	158548060	OR6Y1	protein_coding	ENST00000302617.3	47	CGI:chr1:158180830-158181713	.
cg10471825	0.349787	0.764928	-0.415141	7.41342e-18	3.21723e-20	chr16	73523424	73523425	.	.	.	.	CGI:chr16:73065913-73066892	.
cg15462970	0.37641	0.790961	-0.414551	3.4231e-18	1.63785e-20	chr10	1402391	1402392	ADARB2	protein_coding	ENST00000381312.4	335086	CGI:chr10:1397426-1397819	.
cg26014409	0.293362	0.707778	-0.414416	7.80718e-23	1.66617e-24	chr1	158354681	158354682	CD1E;CD1E;CD1E;CD1E;CD1E;CD1E;CD1E;CD1E;CD1E;CD1E;CD1E;CD1E;CD1E;CD1E;CD1E	protein_coding;protein_coding;protein_coding;protein_coding;protein_coding;protein_coding;protein_coding;protein_coding;protein_coding;protein_coding;protein_coding;protein_coding;protein_coding;protein_coding;protein_coding	ENST00000368154.4;ENST00000368155.6;ENST00000368156.4;ENST00000368157.4;ENST00000368160.6;ENST00000368161.6;ENST00000368162.2;ENST00000368163.6;ENST00000368164.6;ENST00000368165.6;ENST00000368166.6;ENST00000368167.6;ENST00000444681.5;ENST00000452291.5;ENST00000464822.1	691;691;691;691;691;691;-1214;770;764;797;795;930;984;836;500	CGI:chr1:158180830-158181713	.
cg06937491	0.55555	0.969846	-0.414296	7.83828e-13	8.41662e-16	chr12	1834556	1834557	CACNA2D4;CACNA2D4;CACNA2D4;CACNA2D4;CACNA2D4;CACNA2D4;CACNA2D4;CACNA2D4;CACNA2D4;LRTM2;LRTM2;LRTM2;LRTM2	protein_coding;protein_coding;protein_coding;protein_coding;protein_coding;protein_coding;protein_coding;protein_coding;protein_coding;protein_coding;protein_coding;protein_coding;protein_coding	ENST00000280663.11;ENST00000382722.8;ENST00000444595.5;ENST00000537784.4;ENST00000585708.4;ENST00000585732.1;ENST00000586184.4;ENST00000587995.4;ENST00000588077.4;ENST00000299194.4;ENST00000535041.4;ENST00000543730.1;ENST00000543818.4	84111;84281;84082;19482;80672;83991;83918;83976;80672;14026;13924;14045;14288	CGI:chr12:1864573-1865273	.
cg08162224	0.474184	0.888217	-0.414033	3.16669e-12	2.89271e-15	chr1	241641119	241641120	OPN3;OPN3;OPN3;OPN3;OPN3	protein_coding;protein_coding;protein_coding;protein_coding;protein_coding	ENST00000366554.2;ENST00000463155.4;ENST00000469376.4;ENST00000478849.1;ENST00000490673.4	-757;36258;-778;-908;-763	CGI:chr1:241640245-241640590	S_Shore
cg26840068	0.470212	0.884228	-0.414016	1.24047e-13	1.64039e-16	chr1	248323865	248323866	OR2M7	protein_coding	ENST00000317965.3	704	CGI:chr1:248691729-248692169	.
cg24516259	0.451762	0.86533	-0.413568	2.01175e-14	3.27038e-17	chr1	2497425	2497426	PLCH2;PLCH2;PLCH2;PLCH2;PLCH2;PLCH2;PLCH2	protein_coding;protein_coding;protein_coding;protein_coding;protein_coding;protein_coding;protein_coding	ENST00000278878.6;ENST00000343889.7;ENST00000378486.6;ENST00000419816.5;ENST00000449969.4;ENST00000462379.1;ENST00000473964.4	17536;18334;21109;21109;29965;-1223;-358	CGI:chr1:2502147-2502626	.
cg24185447	0.451234	0.864471	-0.413237	8.70589e-16	2.09925e-18	chr5	15935770	15935771	FBXL7;FBXL7;FBXL7	protein_coding;protein_coding;protein_coding	ENST00000329673.8;ENST00000504595.1;ENST00000510662.1	7881;435573;434331	CGI:chr5:15936532-15937207	N_Shore
cg13035219	0.364788	0.777887	-0.413099	7.21686e-15	1.33363e-17	chr7	1364168	1364169	.	.	.	.	CGI:chr7:1368880-1369671	.
cg04625975	0.390753	0.80374	-0.412987	3.93233e-22	6.53832e-24	chr10	43790416	43790417	HNRNPA3P1	processed_pseudogene	ENST00000401429.1	-28	CGI:chr10:43728368-43728578	.
cg07805542	0.247834	0.660574	-0.412739	5.65817e-28	1.01557e-28	chr1	9719251	9719252	PIK3CD;PIK3CD;PIK3CD;PIK3CD;PIK3CD	protein_coding;protein_coding;protein_coding;protein_coding;protein_coding	ENST00000361110.5;ENST00000377346.7;ENST00000536656.4;ENST00000543390.2;ENST00000628140.1	9052;67505;67518;9052;67518	CGI:chr1:9715650-9715939	S_Shelf
cg06051311	0.276441	0.688703	-0.412262	1.26478e-22	2.52956e-24	chr6	30163224	30163225	TRIM15;TRIM15;TRIM15	protein_coding;protein_coding;protein_coding	ENST00000376688.2;ENST00000376694.7;ENST00000619857.3	-462;7;17	CGI:chr6:30171941-30172486	.
cg08387538	0.493711	0.905941	-0.412231	2.33306e-09	1.08098e-12	chr8	1579829	1579830	DLGAP2;DLGAP2;DLGAP2;DLGAP2-AS1	protein_coding;protein_coding;protein_coding;antisense	ENST00000421627.5;ENST00000520901.4;ENST00000612087.1;ENST00000518063.4	78462;31184;78462;40707	CGI:chr8:1561684-1563569	.
cg02195405	0.353126	0.765184	-0.412058	3.23889e-22	5.51782e-24	chr8	7792580	7792581	.	.	.	.	CGI:chr8:7792089-7792343	S_Shore
cg11725972	0.489433	0.901419	-0.411986	8.01371e-19	4.57926e-21	chr7	155399150	155399151	RP5-912I13.1	sense_overlapping	ENST00000569431.1	-773	CGI:chr7:155381433-155382553	.
cg07628717	0.347743	0.759055	-0.411311	3.1172e-16	8.47065e-19	chr7	4712387	4712388	FOXK1	protein_coding	ENST00000328914.4	30077	CGI:chr7:4718171-4718406	.
cg15013801	0.281765	0.692288	-0.410523	8.2347e-20	6.27918e-22	chr10	72217032	72217033	ANAPC16;ANAPC16;ANAPC16;ANAPC16;ASCC1;ASCC1;ASCC1;ASCC1;ASCC1;ASCC1;ASCC1;ASCC1;ASCC1;ASCC1;ASCC1;ASCC1	protein_coding;protein_coding;protein_coding;protein_coding;protein_coding;protein_coding;protein_coding;protein_coding;protein_coding;protein_coding;protein_coding;protein_coding;protein_coding;protein_coding;protein_coding;protein_coding	ENST00000299381.4;ENST00000478193.4;ENST00000615507.3;ENST00000621663.3;ENST00000317126.7;ENST00000317168.9;ENST00000342444.7;ENST00000394915.6;ENST00000394919.4;ENST00000492502.2;ENST00000524829.4;ENST00000526751.4;ENST00000527593.4;ENST00000530461.4;ENST00000532011.4;ENST00000533958.1	983;1002;1031;1031;103;-743;-756;-922;-922;-774;-720;-1058;-755;-745;-749;-756	CGI:chr10:72215913-72216357	S_Shore
cg04020792	0.528897	0.939274	-0.410377	1.9648e-08	7.66559e-12	chr12	110340709	110340710	ATP2A2;ATP2A2;ATP2A2;ATP2A2	protein_coding;protein_coding;protein_coding;protein_coding	ENST00000308664.9;ENST00000377685.8;ENST00000539276.5;ENST00000548169.2	59592;59411;59027;48659	CGI:chr12:110280587-110282257	.
cg00084798	0.445002	0.855014	-0.410011	4.22426e-29	1.47849e-29	chr8	141760604	141760605	.	.	.	.	CGI:chr8:141760551-141760796	Island
cg05570237	0.392534	0.802434	-0.409901	1.22192e-23	3.40775e-25	chr21	26562180	26562181	CYYR1;CYYR1;CYYR1-AS1	protein_coding;protein_coding;antisense	ENST00000299340.7;ENST00000400043.3;ENST00000357401.3	11105;10997;156236	CGI:chr21:26572691-26573327	.
cg19537558	0.438197	0.848054	-0.409857	1.77705e-16	5.13386e-19	chr5	168123991	168123992	CTB-178M22.1;TENM2;TENM2;TENM2;TENM2;TENM2	antisense;protein_coding;protein_coding;protein_coding;protein_coding;protein_coding	ENST00000517408.1;ENST00000403607.2;ENST00000518659.4;ENST00000519204.4;ENST00000520394.4;ENST00000545108.4	63729;248005;839191;369054;368987;248005	CGI:chr5:168262222-168262733	.
cg08363345	0.306076	0.715926	-0.40985	4.95837e-21	5.57438e-23	chr7	4712432	4712433	FOXK1	protein_coding	ENST00000328914.4	30122	CGI:chr7:4718171-4718406	.
cg00160262	0.348031	0.757841	-0.40981	2.99237e-20	2.59561e-22	chr1	158563435	158563436	OR6P1	protein_coding	ENST00000334632.1	170	CGI:chr1:158180830-158181713	.
cg16490191	0.463195	0.872097	-0.408903	4.48641e-16	1.16573e-18	chr16	1378638	1378639	UNKL;UNKL;UNKL;UNKL;UNKL;UNKL;UNKL;UNKL	protein_coding;protein_coding;protein_coding;protein_coding;protein_coding;protein_coding;protein_coding;protein_coding	ENST00000248104.10;ENST00000389221.7;ENST00000397464.4;ENST00000402641.5;ENST00000403703.4;ENST00000508903.5;ENST00000513783.1;ENST00000515195.1	1046;36083;1046;1043;1008;36054;484;539	CGI:chr16:1379049-1380103	N_Shore
cg01733284	0.453826	0.862618	-0.408791	1.21205e-16	3.68244e-19	chr1	158421329	158421330	OR10K2	protein_coding	ENST00000314902.2	-462	CGI:chr1:158180830-158181713	.
cg03081173	0.354474	0.763115	-0.408641	1.15709e-19	8.53491e-22	chr6	31198725	31198726	HCG27;HCG27;HCG27;XXbac-BPG299F13.17	protein_coding;protein_coding;protein_coding;antisense	ENST00000383331.4;ENST00000414008.2;ENST00000424675.1;ENST00000606367.1	964;584;586;-687	CGI:chr6:31197635-31198146	S_Shore
cg07473553	0.392127	0.800164	-0.408037	1.50643e-13	1.94593e-16	chr3	125936564	125936565	ALG1L	protein_coding	ENST00000340333.6	476	CGI:chr3:125915455-125917106	.
cg16746901	0.433896	0.841843	-0.407947	3.8762e-16	1.02429e-18	chr11	2407201	2407202	AC124057.5;TRPM5;TRPM5;TRPM5;TRPM5	antisense;protein_coding;protein_coding;protein_coding;protein_coding	ENST00000433035.1;ENST00000155858.9;ENST00000528453.1;ENST00000533060.4;ENST00000533881.4	2685;15845;15842;15842;15812	CGI:chr11:2399810-2401244	.
cg01423643	0.495024	0.902654	-0.40763	2.03515e-16	5.80051e-19	chr1	161022568	161022569	F11R;F11R;F11R;F11R;F11R;RP11-544M22.13;RP11-544M22.13	protein_coding;protein_coding;protein_coding;protein_coding;protein_coding;protein_coding;protein_coding	ENST00000335772.3;ENST00000368026.9;ENST00000537746.1;ENST00000602966.1;ENST00000621309.3;ENST00000289779.6;ENST00000470694.1	-1424;-1219;-1471;-1392;-1224;16377;16395	CGI:chr1:161020928-161021435	S_Shore
cg15231462	0.397211	0.804193	-0.406982	6.94487e-19	4.04443e-21	chr1	247605949	247605950	OR2G3;RP11-978I15.10;RP11-978I15.10	protein_coding;antisense;antisense	ENST00000320002.3;ENST00000435333.4;ENST00000446347.1	362;34906;34255	CGI:chr1:247639436-247639839	.
cg01767053	0.429697	0.836599	-0.406902	1.50066e-18	7.91607e-21	chr16	85645278	85645279	GSE1;GSE1;GSE1;GSE1	protein_coding;protein_coding;protein_coding;protein_coding	ENST00000253458.10;ENST00000393243.4;ENST00000405402.5;ENST00000411612.4	32061;31925;33868;32120	CGI:chr16:85642685-85642986	S_Shelf
cg09169356	0.300487	0.707262	-0.406775	2.04159e-19	1.40501e-21	chr10	2281188	2281189	.	.	.	.	CGI:chr10:2315054-2315277	.
cg19509829	0.539269	0.945693	-0.406424	1.74017e-09	8.30064e-13	chr12	110340860	110340861	ATP2A2;ATP2A2;ATP2A2;ATP2A2	protein_coding;protein_coding;protein_coding;protein_coding	ENST00000308664.9;ENST00000377685.8;ENST00000539276.5;ENST00000548169.2	59743;59562;59178;48810	CGI:chr12:110280587-110282257	.
cg24995678	0.4331	0.83944	-0.406339	1.94377e-10	1.14263e-13	chr2	235027750	235027751	SH3BP4;SH3BP4;SH3BP4;SH3BP4;SH3BP4;SH3BP4;SH3BP4	protein_coding;protein_coding;protein_coding;protein_coding;protein_coding;protein_coding;protein_coding	ENST00000344528.7;ENST00000392011.5;ENST00000409212.4;ENST00000416021.4;ENST00000444916.4;ENST00000446904.4;ENST00000454947.1	49046;75776;49064;75673;49044;46125;32909	CGI:chr2:235042808-235043170	.
cg10340048	0.344667	0.750954	-0.406288	7.28316e-18	3.17448e-20	chr8	73346449	73346450	RP11-434I12.2;RP11-434I12.2	antisense;antisense	ENST00000514599.4;ENST00000517475.1	10013;9912	CGI:chr8:73293988-73295944	.
cg22946562	0.433365	0.839613	-0.406247	1.40178e-15	3.1869e-18	chr2	1876240	1876241	MYT1L;MYT1L	protein_coding;protein_coding	ENST00000399161.5;ENST00000428368.5	454955;454877	CGI:chr2:1891925-1892160	.
cg09197075	0.408005	0.814034	-0.40603	1.211e-23	3.40775e-25	chr16	11675835	11675836	SNN	protein_coding	ENST00000329565.5	7420	CGI:chr16:11667885-11669087	.
cg23864180	0.476205	0.881577	-0.405372	7.71379e-11	4.99505e-14	chr10	1210413	1210414	ADARB2	protein_coding	ENST00000381312.4	527064	CGI:chr10:1206201-1206565	S_Shelf
cg04833713	0.38767	0.792859	-0.405188	1.28328e-18	6.91529e-21	chr10	73111320	73111321	NUDT13;NUDT13;NUDT13;NUDT13;NUDT13;NUDT13;NUDT13;NUDT13	protein_coding;protein_coding;protein_coding;protein_coding;protein_coding;protein_coding;protein_coding;protein_coding	ENST00000349051.8;ENST00000357321.7;ENST00000372997.3;ENST00000469925.1;ENST00000488223.4;ENST00000537969.4;ENST00000544879.4;ENST00000617744.3	860;860;789;799;860;944;944;944	CGI:chr10:73096100-73097227	.
cg16151261	0.406572	0.811416	-0.404844	3.84776e-17	1.35689e-19	chr18	77979341	77979342	LINC01029;LINC01029	lincRNA;lincRNA	ENST00000582805.1;ENST00000583106.1	14382;3499	CGI:chr18:77978538-77978945	S_Shore
cg26687670	0.415829	0.820093	-0.404264	1.23736e-12	1.25584e-15	chr1	241641637	241641638	OPN3;OPN3;OPN3;OPN3;OPN3	protein_coding;protein_coding;protein_coding;protein_coding;protein_coding	ENST00000366554.2;ENST00000463155.4;ENST00000469376.4;ENST00000478849.1;ENST00000490673.4	-1275;35740;-1296;-1426;-1281	CGI:chr1:241640245-241640590	S_Shore
cg01577083	0.358323	0.762543	-0.40422	5.84492e-24	1.87681e-25	chr16	5436267	5436268	RP11-420N3.2;RP11-420N3.3	lincRNA;processed_transcript	ENST00000585867.2;ENST00000569895.3	196451;196464	CGI:chr16:5239581-5240385	.
cg25344322	0.506255	0.910129	-0.403874	1.50322e-15	3.38892e-18	chr13	111920700	111920701	.	.	.	.	CGI:chr13:111921409-111921684	N_Shore
cg14602220	0.489591	0.89327	-0.403679	6.4047e-11	4.22142e-14	chr17	79178038	79178039	RBFOX3;RBFOX3;RBFOX3;RBFOX3;RBFOX3;RBFOX3	protein_coding;protein_coding;protein_coding;protein_coding;protein_coding;protein_coding	ENST00000580155.4;ENST00000580508.1;ENST00000582043.4;ENST00000582139.1;ENST00000583458.4;ENST00000584778.4	338111;5435;57768;30519;304561;330831	CGI:chr17:79182746-79184147	.
cg26014281	0.45121	0.854601	-0.403391	8.39123e-13	8.91745e-16	chr7	157434532	157434533	.	.	.	.	CGI:chr7:157441419-157442548	.
cg07804408	0.418532	0.821908	-0.403376	1.52049e-14	2.55299e-17	chr5	167097118	167097119	.	.	.	.	CGI:chr5:166978479-166978687	.
cg16581308	0.374213	0.776469	-0.402257	3.13121e-25	1.61165e-26	chr4	16860457	16860458	LDB2;LDB2;LDB2;LDB2;LDB2;LDB2;LDB2;LDB2;LDB2	protein_coding;protein_coding;protein_coding;protein_coding;protein_coding;protein_coding;protein_coding;protein_coding;protein_coding	ENST00000304523.8;ENST00000441778.5;ENST00000502640.4;ENST00000504189.1;ENST00000506732.1;ENST00000508918.4;ENST00000510825.4;ENST00000512345.4;ENST00000515064.4	38353;38138;38178;37922;38204;38178;38222;38165;38106	CGI:chr4:16360793-16361143	.
cg05394294	0.506878	0.909118	-0.40224	1.72028e-09	8.21528e-13	chr10	3118734	3118735	PFKP;PFKP;PFKP	protein_coding;protein_coding;protein_coding	ENST00000381075.5;ENST00000381125.7;ENST00000413079.1	50106;51213;5275	CGI:chr10:3118696-3118915	Island
cg02443967	0.578893	0.980029	-0.401136	5.69096e-17	1.90789e-19	chr10	96370145	96370146	TLL2	protein_coding	ENST00000357947.3	143767	CGI:chr10:96384542-96384756	.
cg25338036	0.567564	0.968505	-0.400941	9.1352e-12	7.42613e-15	chr8	3190014	3190015	CSMD1;CSMD1;CSMD1;CSMD1;CSMD1;CSMD1;CSMD1;CSMD1	protein_coding;protein_coding;protein_coding;protein_coding;protein_coding;protein_coding;protein_coding;protein_coding	ENST00000335551.10;ENST00000400186.6;ENST00000520002.4;ENST00000523387.4;ENST00000523488.4;ENST00000537824.2;ENST00000602557.4;ENST00000602723.4	219594;1804688;1804959;94641;206306;842087;1804959;1804688	CGI:chr8:3022164-3022426	.
cg16279237	0.54042	0.941281	-0.400862	1.59525e-11	1.21948e-14	chr14	105708331	105708332	IGHA1;IGHG1	IG_C_gene;IG_C_gene	ENST00000390547.3;ENST00000618756.3	335;830014	CGI:chr14:105713480-105713681	.
cg06974428	0.362378	0.762997	-0.400619	1.40715e-15	3.19807e-18	chr10	22683370	22683371	PIP4K2A;PIP4K2A;PIP4K2A	protein_coding;protein_coding;protein_coding	ENST00000376573.7;ENST00000545335.4;ENST00000605011.1	31186;30739;8461	CGI:chr10:22713226-22714398	.
cg03935060	0.375171	0.775758	-0.400587	1.81782e-15	4.01032e-18	chr16	10178164	10178165	GRIN2A;GRIN2A;GRIN2A;GRIN2A	protein_coding;protein_coding;protein_coding;protein_coding	ENST00000330684.3;ENST00000396573.5;ENST00000562109.4;ENST00000568247.2	4243;4591;3724;1840	CGI:chr16:10180086-10183567	N_Shore
cg11611448	0.38683	0.78736	-0.400531	2.7368e-17	1.00883e-19	chr2	126696206	126696207	GYPC;GYPC;GYPC;GYPC	protein_coding;protein_coding;protein_coding;protein_coding	ENST00000259254.7;ENST00000356887.10;ENST00000409836.3;ENST00000464053.1	40272;40270;40021;40016	CGI:chr2:126656120-126656595	.
cg10168086	0.296687	0.697122	-0.400435	3.44512e-18	1.64613e-20	chr16	26488645	26488646	.	.	.	.	CGI:chr16:27109690-27110060	.
cg11342789	0.423462	0.823767	-0.400305	1.9707e-13	2.46381e-16	chr1	162382233	162382234	C1orf226;C1orf226;C1orf226;RP11-565P22.6	protein_coding;protein_coding;protein_coding;protein_coding	ENST00000420220.1;ENST00000426197.2;ENST00000458626.3;ENST00000367932.3	15324;3391;502;14920	CGI:chr1:162367086-162367531	.
cg05651243	0.389616	0.789632	-0.400016	1.44709e-09	7.0144e-13	chr11	134657124	134657125	.	.	.	.	CGI:chr11:134664348-134664563	.
cg16674248	0.383442	0.783103	-0.399661	1.55813e-14	2.60717e-17	chr22	46268505	46268506	TTC38;TTC38;TTC38;TTC38;TTC38	protein_coding;protein_coding;protein_coding;protein_coding;protein_coding	ENST00000381031.6;ENST00000417709.4;ENST00000421359.4;ENST00000475467.1;ENST00000629918.1	540;543;496;496;464	CGI:chr22:46267708-46268149	S_Shore
cg18045100	0.298039	0.697629	-0.39959	3.57562e-13	4.18551e-16	chr5	3764427	3764428	.	.	.	.	CGI:chr5:3854422-3854682	.
cg07598464	0.297677	0.697225	-0.399547	2.70102e-18	1.34188e-20	chr1	248203581	248203582	OR2M3	protein_coding	ENST00000456743.2	512	CGI:chr1:247937023-247937424	.
cg16365424	0.408712	0.808228	-0.399516	3.39403e-15	6.89443e-18	chr1	234564890	234564891	RP5-855F14.2	lincRNA	ENST00000429507.1	-409	CGI:chr1:234599788-234600374	.
cg14128411	0.421374	0.820826	-0.399452	2.61743e-16	7.25912e-19	chr2	1923135	1923136	MYT1L;MYT1L;MYT1L	protein_coding;protein_coding;protein_coding	ENST00000399161.5;ENST00000428368.5;ENST00000602387.4	408060;407982;-404	CGI:chr2:1937296-1937788	.
cg16493071	0.553336	0.952311	-0.398975	3.7904e-09	1.6827e-12	chr16	1175126	1175127	CACNA1H;CACNA1H;CACNA1H	protein_coding;protein_coding;protein_coding	ENST00000348261.8;ENST00000358590.7;ENST00000565831.4	21884;21884;21387	CGI:chr16:1177260-1177476	N_Shelf
cg15138339	0.482444	0.881334	-0.39889	1.39704e-21	1.92127e-23	chr17	42563204	42563205	COASY;COASY;COASY;COASY;COASY;COASY;COASY	protein_coding;protein_coding;protein_coding;protein_coding;protein_coding;protein_coding;protein_coding	ENST00000393818.2;ENST00000421097.5;ENST00000586771.1;ENST00000588353.1;ENST00000590958.4;ENST00000591753.1;ENST00000591779.4	1036;1056;1061;-812;1052;-104;1055	CGI:chr17:42562069-42563264	Island
cg17583957	0.422944	0.821716	-0.398772	2.0963e-22	3.79176e-24	chr17	69540158	69540159	MAP2K6;MAP2K6;MAP2K6;MAP2K6;MAP2K6	protein_coding;protein_coding;protein_coding;protein_coding;protein_coding	ENST00000359094.6;ENST00000589647.4;ENST00000590474.4;ENST00000592348.1;ENST00000613873.3	125323;37728;125459;4091;37728	CGI:chr17:69326568-69327696	.
cg22836359	0.483839	0.88253	-0.398691	4.9922e-12	4.34622e-15	chr12	6824382	6824383	GPR162;GPR162;GPR162;GPR162;GPR162;GPR162	protein_coding;protein_coding;protein_coding;protein_coding;protein_coding;protein_coding	ENST00000311268.6;ENST00000382315.6;ENST00000428545.5;ENST00000535220.1;ENST00000541431.1;ENST00000545321.1	2836;2513;2677;2757;2552;-113	CGI:chr12:6824110-6824439	Island
cg14487665	0.523459	0.921327	-0.397868	2.13845e-14	3.4515e-17	chr9	137514182	137514183	PNPLA7;PNPLA7;PNPLA7	protein_coding;protein_coding;protein_coding	ENST00000277531.7;ENST00000406427.4;ENST00000434090.2	36203;36353;36203	CGI:chr9:137506800-137507004	.
cg06996389	0.479935	0.876983	-0.397048	6.11997e-17	2.03434e-19	chr10	130747910	130747911	.	.	.	.	CGI:chr10:130785456-130785900	.
cg23498518	0.521258	0.918152	-0.396894	2.75887e-10	1.56513e-13	chr7	53036643	53036644	POM121L12	protein_coding	ENST00000408890.5	1000	CGI:chr7:53035582-53036266	S_Shore
cg16239218	0.437525	0.834377	-0.396852	5.15746e-16	1.32194e-18	chr10	115956298	115956299	.	.	.	.	CGI:chr10:116125302-116125518	.
cg24554839	0.37775	0.774306	-0.396556	7.58492e-18	3.28352e-20	chr1	166155666	166155667	FAM78B;FAM78B;FAM78B;FAM78B;FAM78B;MIR921;RP11-9L18.3	protein_coding;protein_coding;protein_coding;protein_coding;protein_coding;miRNA;sense_intronic	ENST00000338353.3;ENST00000354422.3;ENST00000435676.2;ENST00000441649.1;ENST00000456900.1;ENST00000401133.1;ENST00000451784.1	11304;11050;10560;10569;10716;-867;9430	CGI:chr1:166165021-166167211	.
cg07403258	0.55742	0.953686	-0.396266	1.40032e-12	1.40272e-15	chr13	111548517	111548518	.	.	.	.	CGI:chr13:111547865-111548546	Island
cg26495711	0.452354	0.848238	-0.395885	8.85063e-13	9.33907e-16	chr2	239247584	239247585	HDAC4;HDAC4;HDAC4;HDAC4;HDAC4;HDAC4;HDAC4	protein_coding;protein_coding;protein_coding;protein_coding;protein_coding;protein_coding;protein_coding	ENST00000345617.6;ENST00000446876.1;ENST00000463007.4;ENST00000493582.4;ENST00000535493.4;ENST00000543185.4;ENST00000544989.1	153366;61629;51056;154071;50947;153366;153428	CGI:chr2:239231780-239232096	.
cg26075742	0.464246	0.860093	-0.395847	1.02646e-11	8.22484e-15	chr8	10895727	10895728	.	.	.	.	CGI:chr8:10924544-10924793	.
cg21033171	0.342937	0.738296	-0.395359	2.88424e-06	8.69757e-10	chr2	2581324	2581325	.	.	.	.	CGI:chr2:2650336-2650586	.
cg04987122	0.468078	0.863365	-0.395287	2.69696e-12	2.5058e-15	chr16	2163439	2163440	TRAF7;TRAF7;TRAF7;TRAF7;TRAF7;TRAF7	protein_coding;protein_coding;protein_coding;protein_coding;protein_coding;protein_coding	ENST00000326181.9;ENST00000564067.4;ENST00000565383.4;ENST00000567645.2;ENST00000567653.4;ENST00000569686.4	7673;7609;7740;-104;7634;7660	CGI:chr16:2164221-2165918	N_Shore
cg00073384	0.415787	0.810936	-0.395149	8.51148e-15	1.54074e-17	chr1	248180349	248180350	OR2M2	protein_coding	ENST00000359682.2	362	CGI:chr1:247937023-247937424	.
cg23960736	0.365061	0.760159	-0.395098	2.14902e-18	1.08929e-20	chr1	4111534	4111535	.	.	.	.	CGI:chr1:4132573-4133183	.
cg07164722	0.471561	0.866356	-0.394796	1.33442e-16	3.98845e-19	chr1	247424076	247424077	NLRP3;NLRP3;NLRP3;NLRP3;NLRP3;NLRP3;NLRP3	protein_coding;protein_coding;protein_coding;protein_coding;protein_coding;protein_coding;protein_coding	ENST00000336119.6;ENST00000348069.5;ENST00000366496.5;ENST00000366497.5;ENST00000391827.2;ENST00000391828.6;ENST00000474792.1	6026;6026;6023;7919;5280;7919;5455	CGI:chr1:247406013-247406500	.
cg21336434	0.354898	0.749506	-0.394608	6.8626e-18	3.0118e-20	chr7	54203589	54203590	.	.	.	.	CGI:chr7:54542041-54542447	.
cg05775492	0.401973	0.796328	-0.394355	4.52662e-24	1.55325e-25	chr16	86225111	86225112	.	.	.	.	CGI:chr16:86286569-86287449	.
cg01932361	0.386707	0.781032	-0.394325	5.89694e-16	1.49236e-18	chr16	86952387	86952388	.	.	.	.	CGI:chr16:86931665-86931890	.
cg26703511	0.540154	0.934478	-0.394324	6.92351e-13	7.52322e-16	*	-1	-1	.	.	.	.	.	.
cg24659037	0.495247	0.889556	-0.394309	2.73321e-11	1.97364e-14	chr6	167664221	167664222	.	.	.	.	CGI:chr6:167662190-167662649	S_Shore
cg23342625	0.407642	0.801793	-0.39415	3.48232e-19	2.23021e-21	chr6	20877109	20877110	CDKAL1;CDKAL1	protein_coding;protein_coding	ENST00000274695.7;ENST00000378610.1	342651;330767	CGI:chr6:20401486-20403552	.
cg22743884	0.376761	0.770434	-0.393673	1.34946e-17	5.42886e-20	chr8	11982335	11982336	DEFB135	protein_coding	ENST00000382208.2	13	CGI:chr8:12014609-12015270	.
cg24626659	0.223116	0.61665	-0.393533	1.26665e-24	5.15497e-26	chr10	132940782	132940783	CFAP46;CFAP46;CFAP46	protein_coding;protein_coding;protein_coding	ENST00000368585.3;ENST00000368586.8;ENST00000475340.1	2042;1804;1762	CGI:chr10:132942159-132943348	N_Shore
cg07014174	0.374634	0.767954	-0.39332	4.10759e-25	2.01071e-26	chr21	30881441	30881442	KRTAP11-1	protein_coding	ENST00000332378.5	115	CGI:chr21:31251828-31252066	.
cg22494876	0.319061	0.712259	-0.393199	3.34912e-22	5.69025e-24	chr1	247454859	247454860	.	.	.	.	CGI:chr1:247451393-247451642	S_Shelf
cg01077058	0.326607	0.719751	-0.393144	1.63768e-15	3.65385e-18	chr2	240144447	240144448	OTOS	protein_coding	ENST00000391989.5	116	CGI:chr2:240135986-240136499	.
cg06565975	0.372328	0.765123	-0.392795	2.11651e-15	4.5713e-18	chr8	142742499	142742500	SLURP1	protein_coding	ENST00000246515.1	-87	CGI:chr8:142739050-142739892	S_Shelf
cg13676800	0.383574	0.776142	-0.392568	6.57141e-21	7.04439e-23	chr9	87107517	87107518	.	.	.	.	CGI:chr9:87148421-87148852	.
cg03618016	0.437017	0.829304	-0.392287	2.9563e-16	8.08363e-19	chr1	247606502	247606503	OR2G3;RP11-978I15.10;RP11-978I15.10	protein_coding;antisense;antisense	ENST00000320002.3;ENST00000435333.4;ENST00000446347.1	915;34353;33702	CGI:chr1:247639436-247639839	.
cg11281110	0.409288	0.801224	-0.391936	4.30228e-17	1.49385e-19	*	-1	-1	.	.	.	.	.	.
cg00806644	0.265206	0.656877	-0.391672	1.56198e-14	2.61201e-17	chr10	125201246	125201247	.	.	.	.	CGI:chr10:125228007-125228757	.
cg25135457	0.526116	0.917546	-0.39143	2.02039e-15	4.39625e-18	chr17	42563226	42563227	COASY;COASY;COASY;COASY;COASY;COASY;COASY	protein_coding;protein_coding;protein_coding;protein_coding;protein_coding;protein_coding;protein_coding	ENST00000393818.2;ENST00000421097.5;ENST00000586771.1;ENST00000588353.1;ENST00000590958.4;ENST00000591753.1;ENST00000591779.4	1058;1078;1083;-790;1074;-82;1077	CGI:chr17:42562069-42563264	Island
cg19363785	0.428651	0.820032	-0.391381	1.4947e-12	1.48579e-15	chr8	94080112	94080113	.	.	.	.	CGI:chr8:93916290-93917664	.
cg11081307	0.453213	0.844526	-0.391313	3.07262e-16	8.36575e-19	chr20	59195564	59195565	ZNF831	protein_coding	ENST00000371030.2	4543	CGI:chr20:59191341-59192841	S_Shelf
cg12556823	0.486966	0.878094	-0.391128	4.24011e-18	1.98666e-20	chr6	21023254	21023255	CDKAL1;CDKAL1	protein_coding;protein_coding	ENST00000274695.7;ENST00000378610.1	488796;476912	CGI:chr6:21587190-21588944	.
cg26213458	0.301657	0.692683	-0.391026	3.13113e-28	6.44644e-29	chr12	5809025	5809026	ANO2;ANO2;ANO2	protein_coding;protein_coding;protein_coding	ENST00000327087.11;ENST00000356134.8;ENST00000546188.4	137208;137208;136235	CGI:chr12:5827710-5827919	.
cg19021412	0.474072	0.865008	-0.390936	4.85177e-12	4.23735e-15	chr5	2103143	2103144	.	.	.	.	CGI:chr5:2111722-2112370	.
cg22482278	0.534778	0.925522	-0.390744	1.50417e-11	1.15604e-14	chr17	82331755	82331756	SECTM1;SECTM1;SECTM1;SECTM1;SECTM1;SECTM1;SECTM1	protein_coding;protein_coding;protein_coding;protein_coding;protein_coding;protein_coding;protein_coding	ENST00000269389.6;ENST00000580437.4;ENST00000581691.4;ENST00000581864.4;ENST00000582290.4;ENST00000582563.4;ENST00000583093.4	2244;2008;2320;1994;2012;2015;2009	CGI:chr17:82333144-82334518	N_Shore
cg26102295	0.495739	0.886245	-0.390506	1.35257e-15	3.09108e-18	chr7	1383986	1383987	.	.	.	.	CGI:chr7:1384188-1384417	N_Shore
cg24833737	0.493746	0.884142	-0.390396	7.86571e-10	4.03133e-13	chr8	141622351	141622352	.	.	.	.	CGI:chr8:141620027-141620368	S_Shore
cg20466478	0.459279	0.849365	-0.390085	2.10862e-11	1.5626e-14	chr8	37851091	37851092	BRF2;BRF2;BRF2;BRF2	protein_coding;protein_coding;protein_coding;protein_coding	ENST00000220659.9;ENST00000520601.4;ENST00000521170.4;ENST00000522539.1	-1186;-1252;-1229;-1236	CGI:chr8:37849631-37849989	S_Shore
cg05583676	0.576212	0.966258	-0.390045	1.50863e-09	7.28555e-13	chr10	130662982	130662983	.	.	.	.	CGI:chr10:130567421-130567717	.
cg17132517	0.563233	0.953259	-0.390027	2.94366e-09	1.33525e-12	chr10	132138325	132138326	JAKMIP3	protein_coding	ENST00000298622.7	33653	CGI:chr10:132138194-132138508	Island
cg02788731	0.433274	0.823098	-0.389824	5.53855e-17	1.86304e-19	chr1	247588196	247588197	OR2G2;RP11-978I15.10;RP11-978I15.10	protein_coding;antisense;antisense	ENST00000320065.1;ENST00000435333.4;ENST00000446347.1	-165;52659;52008	CGI:chr1:247639436-247639839	.
cg01022117	0.408852	0.798659	-0.389806	0.00304659	8.69744e-07	chr1	201289152	201289153	PKP1;PKP1;PKP1;PKP1	protein_coding;protein_coding;protein_coding;protein_coding	ENST00000263946.6;ENST00000352845.3;ENST00000367324.6;ENST00000622031.3	5699;5448;5699;5639	CGI:chr1:201283324-201284520	.
cg09732255	0.380281	0.769903	-0.389622	3.89816e-19	2.46274e-21	chr2	2186506	2186507	MYT1L;MYT1L;MYT1L	protein_coding;protein_coding;protein_coding	ENST00000399161.5;ENST00000428368.5;ENST00000479156.1	144689;144611;138030	CGI:chr2:2185428-2186366	S_Shore
cg07551060	0.305106	0.694725	-0.389619	5.37328e-19	3.22029e-21	chr10	119315804	119315805	GRK5	protein_coding	ENST00000392870.2	108214	CGI:chr10:119207870-119208111	.
cg23822732	0.458719	0.848238	-0.389519	5.37587e-15	1.02793e-17	chr2	2689082	2689083	.	.	.	.	CGI:chr2:2650336-2650586	.
cg27143703	0.515968	0.905353	-0.389385	4.09892e-15	8.12357e-18	chr17	79987920	79987921	TBC1D16;TBC1D16	protein_coding;protein_coding	ENST00000310924.5;ENST00000571872.1	47929;5715	CGI:chr17:79992006-79992497	.
cg21342392	0.46939	0.858681	-0.38929	1.88415e-12	1.8222e-15	chr7	111562952	111562953	IMMP2L;IMMP2L;IMMP2L;IMMP2L;IMMP2L;IMMP2L	protein_coding;protein_coding;protein_coding;protein_coding;protein_coding;protein_coding	ENST00000331762.6;ENST00000405709.5;ENST00000447215.4;ENST00000452753.1;ENST00000452895.4;ENST00000492938.1	-434;-660;-1027;-447;-464;-1050	CGI:chr7:111562023-111562627	S_Shore
cg00851761	0.576124	0.965206	-0.389082	9.01999e-09	3.72529e-12	chr10	132138257	132138258	JAKMIP3	protein_coding	ENST00000298622.7	33585	CGI:chr10:132138194-132138508	Island
cg11144436	0.448058	0.836856	-0.388798	3.27861e-17	1.17875e-19	chr17	51931012	51931013	CA10;CA10;CA10;CA10;CA10;CA10	protein_coding;protein_coding;protein_coding;protein_coding;protein_coding;protein_coding	ENST00000285273.7;ENST00000442502.5;ENST00000451037.5;ENST00000570565.4;ENST00000571371.4;ENST00000575181.1	228790;229006;227716;228991;227052;228972	CGI:chr17:52157815-52158874	.
cg05492975	0.434616	0.823408	-0.388793	1.02617e-18	5.68983e-21	chr20	61544452	61544453	CDH4	protein_coding	ENST00000614565.3	292025	CGI:chr20:61544451-61544656	Island
cg17315844	0.448479	0.837224	-0.388744	1.5729e-15	3.52717e-18	chr5	10249001	10249002	CCT5;CCT5;CCT5;CCT5;CCT5;CCT5;CCT5;CCT5;CCT5;CCT5;CTD-2256P15.1;FAM173B;FAM173B;FAM173B;FAM173B;FAM173B;FAM173B;FAM173B	protein_coding;protein_coding;protein_coding;protein_coding;protein_coding;protein_coding;protein_coding;protein_coding;protein_coding;protein_coding;antisense;protein_coding;protein_coding;protein_coding;protein_coding;protein_coding;protein_coding;protein_coding	ENST00000280326.7;ENST00000423695.5;ENST00000503026.4;ENST00000503454.4;ENST00000508451.1;ENST00000510326.4;ENST00000511700.1;ENST00000512975.4;ENST00000515390.4;ENST00000625723.1;ENST00000509915.1;ENST00000280330.11;ENST00000504390.4;ENST00000506108.2;ENST00000508553.1;ENST00000510047.4;ENST00000510052.4;ENST00000511437.4	-921;-1319;-929;-1360;-1309;-1319;-1243;-1319;-1216;-1341;675;896;885;888;888;897;888;886	CGI:chr5:10249648-10250888	N_Shore
cg04633922	0.547109	0.935488	-0.388379	5.83662e-10	3.07839e-13	chr10	2657099	2657100	.	.	.	.	CGI:chr10:2772811-2773277	.
cg18148375	0.383218	0.771542	-0.388324	8.17793e-24	2.46748e-25	chr2	1922763	1922764	MYT1L;MYT1L;MYT1L	protein_coding;protein_coding;protein_coding	ENST00000399161.5;ENST00000428368.5;ENST00000602387.4	408432;408354;-32	CGI:chr2:1937296-1937788	.
cg02478828	0.511669	0.899912	-0.388243	3.70077e-13	4.31613e-16	chr2	73926068	73926069	DGUOK;DGUOK;DGUOK;DGUOK;DGUOK;DGUOK;DGUOK;DGUOK	protein_coding;protein_coding;protein_coding;protein_coding;protein_coding;protein_coding;protein_coding;protein_coding	ENST00000264093.7;ENST00000348222.2;ENST00000418996.4;ENST00000462551.1;ENST00000462685.1;ENST00000489796.4;ENST00000493055.1;ENST00000629438.1	-759;-759;-808;-826;-830;-827;-841;-759	CGI:chr2:73926726-73927154	N_Shore
cg16705697	0.528918	0.917149	-0.388231	2.12652e-13	2.63565e-16	chr11	134861691	134861692	.	.	.	.	CGI:chr11:134762151-134763093	.
cg16027403	0.495324	0.883535	-0.388212	1.24274e-13	1.6429e-16	chr1	247815489	247815490	OR14A16	protein_coding	ENST00000357627.1	241	CGI:chr1:247857028-247857950	.
cg17664269	0.375804	0.763924	-0.38812	1.81901e-15	4.01168e-18	chr3	3038937	3038938	CNTN4;CNTN4;CNTN4;CNTN4;CNTN4;CNTN4	protein_coding;protein_coding;protein_coding;protein_coding;protein_coding;protein_coding	ENST00000397459.5;ENST00000397461.4;ENST00000418658.4;ENST00000427331.4;ENST00000427741.4;ENST00000484686.1	146721;800107;940010;467595;940070;-688	CGI:chr3:3126640-3127547	.
cg02245566	0.463989	0.851947	-0.387958	2.99099e-15	6.17244e-18	chr1	158700827	158700828	OR6K2	protein_coding	ENST00000359610.3	-174	CGI:chr1:159171412-159171928	.
cg10111599	0.494258	0.882065	-0.387807	5.45743e-13	6.10744e-16	chr7	1533815	1533816	MAFK	protein_coding	ENST00000343242.7	3100	CGI:chr7:1536100-1536357	N_Shelf
cg24381587	0.402025	0.789771	-0.387746	2.56918e-19	1.69823e-21	chr1	158766522	158766523	OR6N1	protein_coding	ENST00000335094.3	161	CGI:chr1:159171412-159171928	.
cg05632088	0.419068	0.8067	-0.387632	7.5835e-15	1.39329e-17	chr7	64207068	64207069	ZNF735;ZNF735	protein_coding;protein_coding	ENST00000429565.3;ENST00000623629.1	-23;-65	CGI:chr7:64192252-64192584	.
cg15545942	0.401009	0.788397	-0.387388	1.61539e-22	3.06443e-24	chr2	9386574	9386575	ASAP2;ASAP2	protein_coding;protein_coding	ENST00000281419.6;ENST00000315273.4	179808;179808	CGI:chr2:9393443-9393678	.
cg11686819	0.447479	0.834838	-0.387359	1.46637e-09	7.09714e-13	chr5	2136966	2136967	.	.	.	.	CGI:chr5:2136683-2137191	Island
cg05210380	0.415233	0.802555	-0.387322	1.66085e-13	2.12346e-16	chr6	34561050	34561051	.	.	.	.	CGI:chr6:34544286-34544489	.
cg18231054	0.515924	0.90318	-0.387256	3.00577e-12	2.76266e-15	chr1	1926598	1926599	CFAP74;CFAP74;CFAP74	protein_coding;protein_coding;protein_coding	ENST00000412120.2;ENST00000464311.4;ENST00000493964.4	806;1332;77240	CGI:chr1:1927807-1928084	N_Shore
cg26081974	0.432156	0.819046	-0.386891	6.6873e-15	1.24531e-17	chr13	113411582	113411583	.	.	.	.	CGI:chr13:113412631-113413173	N_Shore
cg01999046	0.399152	0.785664	-0.386512	1.91228e-13	2.40236e-16	chr9	136885256	136885257	MIR4479;RABL6;TRAF2;TRAF2;TRAF2	miRNA;protein_coding;protein_coding;protein_coding;protein_coding	ENST00000579420.1;ENST00000432842.5;ENST00000247668.5;ENST00000419057.4;ENST00000429509.4	-1478;58658;-1263;3343;-810	CGI:chr9:136885954-136887075	N_Shore
cg04052038	0.49625	0.882428	-0.386178	1.61677e-13	2.07202e-16	chr21	30215805	30215806	CLDN8	protein_coding	ENST00000399899.1	269	CGI:chr21:29939068-29939788	.
cg19871597	0.402801	0.788964	-0.386163	7.77721e-17	2.50301e-19	chr13	59018153	59018154	.	.	.	.	CGI:chr13:60163526-60164151	.
cg16434331	0.358394	0.744384	-0.385989	1.29825e-13	1.70566e-16	chr17	72716401	72716402	SLC39A11;SLC39A11;SLC39A11;SLC39A11;SLC39A11;SLC39A11	protein_coding;protein_coding;protein_coding;protein_coding;protein_coding;protein_coding	ENST00000255559.6;ENST00000542342.5;ENST00000579319.1;ENST00000579988.1;ENST00000581581.1;ENST00000582769.4	376293;376288;133376;9214;133306;276533	CGI:chr17:72640377-72640815	.
cg14517004	0.523019	0.908955	-0.385936	1.63062e-12	1.60134e-15	chr22	48550848	48550849	FAM19A5;FAM19A5	protein_coding;protein_coding	ENST00000336769.8;ENST00000402357.4	61255;61387	CGI:chr22:48560078-48560294	.
cg23201695	0.475941	0.861648	-0.385707	1.57656e-15	3.53376e-18	chr8	1324793	1324794	.	.	.	.	CGI:chr8:1315257-1318172	.
cg17627328	0.462055	0.847449	-0.385394	5.203e-17	1.76801e-19	chr5	5146230	5146231	ADAMTS16;ADAMTS16;ADAMTS16;CTD-2297D10.1	protein_coding;protein_coding;protein_coding;antisense	ENST00000274181.7;ENST00000433402.2;ENST00000511368.4;ENST00000514848.1	5899;5761;5899;29985	CGI:chr5:5139328-5140828	.
cg14302471	0.535421	0.92076	-0.385339	1.44417e-09	7.00131e-13	chr7	159007086	159007087	LINC00689;LINC00689;LINC00689	processed_transcript;processed_transcript;processed_transcript	ENST00000417032.1;ENST00000438049.4;ENST00000447563.4	563;-1336;-1269	CGI:chr7:159005900-159006743	S_Shore
cg00217080	0.551535	0.936806	-0.385271	3.55509e-12	3.20155e-15	chr2	4003177	4003178	.	.	.	.	CGI:chr2:4003059-4003262	Island
cg16676676	0.52815	0.913402	-0.385252	4.73672e-19	2.91362e-21	chr1	228371286	228371287	OBSCN;OBSCN;OBSCN	protein_coding;protein_coding;protein_coding	ENST00000366707.7;ENST00000422127.4;ENST00000570156.5	163155;163155;163155	CGI:chr1:228378248-228379420	.
cg18413830	0.29207	0.677241	-0.38517	5.68482e-25	2.65292e-26	chr17	83073660	83073661	.	.	.	.	CGI:chr17:83074706-83075083	N_Shore
cg08305942	0.335964	0.72099	-0.385027	2.1348e-19	1.45366e-21	chr16	79658457	79658458	.	.	.	.	CGI:chr16:79598722-79601640	.
cg21884064	0.360572	0.745444	-0.384873	1.50029e-16	4.4275e-19	chr5	2177530	2177531	.	.	.	.	CGI:chr5:2180137-2180353	N_Shelf
cg26545519	0.384041	0.768882	-0.384841	5.39245e-24	1.78053e-25	chr2	418075	418076	.	.	.	.	CGI:chr2:420051-421142	N_Shore
cg20200460	0.343094	0.727849	-0.384755	6.52772e-17	2.1493e-19	chr10	128367237	128367238	.	.	.	.	CGI:chr10:128286774-128287161	.
cg05828624	0.453921	0.838456	-0.384535	4.60064e-17	1.58396e-19	chr2	79120573	79120574	REG1A;REG1A;REG1A;REG1A	protein_coding;protein_coding;protein_coding;protein_coding	ENST00000233735.1;ENST00000461579.1;ENST00000485184.1;ENST00000488524.1	114;82;-263;210	CGI:chr2:78993066-78993466	.
cg12129480	0.40893	0.793001	-0.384071	5.23637e-16	1.33825e-18	chr1	158579620	158579621	OR10X1;OR10X1;OR10X1	polymorphic_pseudogene;polymorphic_pseudogene;protein_coding	ENST00000623167.1;ENST00000625122.1;ENST00000368150.1	280;280;280	CGI:chr1:158180830-158181713	.
cg20465661	0.301615	0.685518	-0.383903	3.08149e-20	2.65973e-22	chr1	248388108	248388109	OR2T6	protein_coding	ENST00000355728.2	498	CGI:chr1:248691729-248692169	.
cg14840848	0.386349	0.770186	-0.383837	2.18495e-12	2.07949e-15	chr13	112272962	112272963	.	.	.	.	CGI:chr13:112241113-112241394	.
cg16560389	0.535961	0.919658	-0.383697	1.67526e-09	8.01889e-13	chr10	131519938	131519939	.	.	.	.	CGI:chr10:131519765-131520061	Island
cg03308038	0.38541	0.76909	-0.38368	9.17839e-18	3.87741e-20	chr10	131068313	131068314	.	.	.	.	CGI:chr10:131075393-131075612	.
cg26035201	0.403372	0.786954	-0.383583	3.362e-16	9.05851e-19	chr7	1567510	1567511	PSMG3;PSMG3	protein_coding;protein_coding	ENST00000288607.2;ENST00000404674.6	2484;2536	CGI:chr7:1569789-1570401	N_Shelf
cg22391205	0.443655	0.827051	-0.383395	1.64312e-11	1.2517e-14	chr21	46038673	46038674	AP001476.2	lincRNA	ENST00000451618.1	1620	CGI:chr21:46037245-46037825	S_Shore
cg15697852	0.418873	0.802064	-0.383191	7.0225e-16	1.7407e-18	chr5	140718991	140718992	VTRNA1-2	misc_RNA	ENST00000365241.1	65	CGI:chr5:140691219-140691743	.
cg19404723	0.421814	0.804892	-0.383078	8.09479e-13	8.65356e-16	chr8	1501147	1501148	DLGAP2;DLGAP2	protein_coding;protein_coding	ENST00000421627.5;ENST00000612087.1	-220;-220	CGI:chr8:1495701-1495920	.
cg05672569	0.552767	0.935782	-0.383015	7.436e-10	3.8361e-13	chr7	157539851	157539852	PTPRN2;PTPRN2;PTPRN2;PTPRN2	protein_coding;protein_coding;protein_coding;protein_coding	ENST00000389413.6;ENST00000389416.7;ENST00000389418.7;ENST00000409483.4	1047923;1047861;1047829;1047938	CGI:chr7:157527768-157527975	.
cg01226963	0.562039	0.944942	-0.382904	6.7595e-11	4.42955e-14	chr8	1101814	1101815	ERICH1-AS1;ERICH1-AS1	antisense;antisense	ENST00000522092.4;ENST00000578889.1	364162;218485	CGI:chr8:1101641-1101896	Island
cg06777472	0.471002	0.853836	-0.382834	6.28942e-18	2.78469e-20	chr20	59297978	59297979	.	.	.	.	CGI:chr20:59300262-59301071	N_Shelf
cg24377694	0.554083	0.936282	-0.382199	3.49081e-11	2.45363e-14	chr20	1994726	1994727	PDYN;PDYN;PDYN;RP4-684O24.5	protein_coding;protein_coding;protein_coding;antisense	ENST00000217305.2;ENST00000539905.4;ENST00000540134.4;ENST00000446562.1	-668;-440;-977;47479	CGI:chr20:1947072-1947472	.
cg01189072	0.554857	0.937044	-0.382187	3.20308e-08	1.20527e-11	chr1	1679221	1679222	CDK11B;MMP23B;MMP23B;SLC35E2B;SLC35E2B;SLC35E2B;SLC35E2B	protein_coding;protein_coding;protein_coding;protein_coding;protein_coding;protein_coding;protein_coding	ENST00000317673.8;ENST00000412810.5;ENST00000618459.3;ENST00000481276.1;ENST00000611123.1;ENST00000614300.3;ENST00000617444.3	43598;47039;47041;13489;13508;13504;13424	CGI:chr1:1676459-1676804	S_Shelf
cg18330370	0.460201	0.842289	-0.382087	3.34876e-14	5.14859e-17	chr2	987950	987951	SNTG2;SNTG2;SNTG2;SNTG2	protein_coding;protein_coding;protein_coding;protein_coding	ENST00000308624.8;ENST00000407292.1;ENST00000450962.4;ENST00000452177.4	37081;37010;37081;37081	CGI:chr2:950000-951600	.
cg22550446	0.430898	0.812808	-0.38191	1.90997e-15	4.18984e-18	chr5	8059333	8059334	.	.	.	.	CGI:chr5:7868750-7869727	.
cg10216717	0.3687	0.750587	-0.381887	6.74829e-18	2.96349e-20	chr12	128414745	128414746	TMEM132C	protein_coding	ENST00000435159.2	147341	CGI:chr12:128415268-128415520	N_Shore
cg03421657	0.278448	0.660322	-0.381874	1.80677e-26	1.45456e-27	chr1	166070517	166070518	FAM78B;FAM78B;FAM78B;FAM78B;FAM78B	protein_coding;protein_coding;protein_coding;protein_coding;protein_coding	ENST00000338353.3;ENST00000354422.3;ENST00000435676.2;ENST00000441649.1;ENST00000456900.1	96453;96199;95709;95718;95865	CGI:chr1:166165021-166167211	.
cg12205822	0.59112	0.972866	-0.381746	2.96911e-11	2.12318e-14	chr12	2504775	2504776	CACNA1C;CACNA1C;CACNA1C;CACNA1C;CACNA1C;CACNA1C;CACNA1C;CACNA1C;CACNA1C;CACNA1C;CACNA1C;CACNA1C;CACNA1C;CACNA1C;CACNA1C;CACNA1C;CACNA1C;CACNA1C;CACNA1C;CACNA1C;CACNA1C;CACNA1C;CACNA1C;CACNA1C;CACNA1C;CACNA1C;CACNA1C;CACNA1C;CACNA1C	protein_coding;protein_coding;protein_coding;protein_coding;protein_coding;protein_coding;protein_coding;protein_coding;protein_coding;protein_coding;protein_coding;protein_coding;protein_coding;protein_coding;protein_coding;protein_coding;protein_coding;protein_coding;protein_coding;protein_coding;protein_coding;protein_coding;protein_coding;protein_coding;protein_coding;protein_coding;protein_c…	ENST00000327702.10;ENST00000335762.8;ENST00000344100.6;ENST00000347598.7;ENST00000399591.4;ENST00000399595.4;ENST00000399597.4;ENST00000399601.4;ENST00000399603.4;ENST00000399606.4;ENST00000399617.4;ENST00000399621.4;ENST00000399629.4;ENST00000399634.4;ENST00000399637.4;ENST00000399638.4;ENST00000399641.4;ENST00000399644.4;ENST00000399649.4;ENST00000399655.4;ENST00000402845.6;ENST00000406454.6;EN…	451211;451476;451211;451211;451211;451211;451211;451211;451211;451211;451211;451211;451211;451211;451211;451211;451211;451211;451211;451476;451211;451211;451236;338;55798;55798;55798;55798;55798	CGI:chr12:2679448-2679713	.
cg21584862	0.428538	0.809961	-0.381423	7.3781e-15	1.3602e-17	chr6	15132952	15132953	.	.	.	.	CGI:chr6:15244646-15245802	.
cg19618279	0.488071	0.869406	-0.381336	9.19389e-19	5.15683e-21	chr17	42563210	42563211	COASY;COASY;COASY;COASY;COASY;COASY;COASY	protein_coding;protein_coding;protein_coding;protein_coding;protein_coding;protein_coding;protein_coding	ENST00000393818.2;ENST00000421097.5;ENST00000586771.1;ENST00000588353.1;ENST00000590958.4;ENST00000591753.1;ENST00000591779.4	1042;1062;1067;-806;1058;-98;1061	CGI:chr17:42562069-42563264	Island
cg05951296	0.42517	0.806072	-0.380901	2.38788e-22	4.221e-24	chr10	128803862	128803863	.	.	.	.	CGI:chr10:128710103-128710394	.
cg16336556	0.32293	0.703612	-0.380682	1.68837e-22	3.1856e-24	chr2	33070071	33070072	LTBP1	protein_coding	ENST00000404816.5	123098	CGI:chr2:32946381-32948097	.
cg11392848	0.37563	0.756193	-0.380564	8.18534e-20	6.24835e-22	chr8	49075215	49075216	C8orf22;C8orf22;C8orf22;C8orf22	protein_coding;protein_coding;protein_coding;protein_coding	ENST00000303202.8;ENST00000399653.7;ENST00000517663.4;ENST00000522267.4	2860;2870;20903;2873	CGI:chr8:48977827-48978315	.
cg21851391	0.425335	0.805774	-0.380438	1.24661e-14	2.15039e-17	chr8	1500832	1500833	DLGAP2;DLGAP2	protein_coding;protein_coding	ENST00000421627.5;ENST00000612087.1	-535;-535	CGI:chr8:1495701-1495920	.
cg13854962	0.461519	0.841928	-0.38041	4.02117e-15	7.98304e-18	chr9	134820930	134820931	COL5A1;COL5A1	protein_coding;protein_coding	ENST00000371817.6;ENST00000618395.3	179155;179124	CGI:chr9:134818116-134818445	S_Shelf
cg08892613	0.519981	0.900151	-0.38017	4.95905e-09	2.14864e-12	chr5	2702305	2702306	.	.	.	.	CGI:chr5:2738839-2741123	.
cg12664951	0.506362	0.886384	-0.380022	1.64489e-11	1.25264e-14	chr10	116058056	116058057	GFRA1;GFRA1	protein_coding;protein_coding	ENST00000369236.4;ENST00000439649.6	214227;215229	CGI:chr10:116125302-116125518	.
cg18451817	0.371921	0.751836	-0.379915	1.16364e-25	6.96195e-27	chr5	2132222	2132223	.	.	.	.	CGI:chr5:2136683-2137191	.
cg14026101	0.356917	0.736649	-0.379732	5.74803e-18	2.58587e-20	*	-1	-1	.	.	.	.	.	.
cg09291131	0.572893	0.952459	-0.379566	5.91037e-08	2.13393e-11	chr14	101055472	101055473	MIR323B;MIR382;MIR485	miRNA;miRNA;miRNA	ENST00000385269.2;ENST00000385009.2;ENST00000385292.3	-748;-1085;64	CGI:chr14:101065306-101066047	.
cg11484413	0.363001	0.742544	-0.379543	2.86639e-21	3.58299e-23	chr11	127775123	127775124	.	.	.	.	CGI:chr11:128451766-128452000	.
cg17341136	0.46025	0.839726	-0.379477	3.05021e-16	8.30796e-19	chr12	132316753	132316754	GALNT9;GALNT9	protein_coding;protein_coding	ENST00000328957.11;ENST00000424720.5	12451;12597	CGI:chr12:132319713-132319983	N_Shelf
cg04604142	0.366701	0.746105	-0.379404	1.16088e-14	2.01792e-17	chr17	50719154	50719155	LUC7L3;LUC7L3;LUC7L3;LUC7L3;LUC7L3;LUC7L3;LUC7L3;LUC7L3;LUC7L3;LUC7L3;LUC7L3;LUC7L3;LUC7L3	protein_coding;protein_coding;protein_coding;protein_coding;protein_coding;protein_coding;protein_coding;protein_coding;protein_coding;protein_coding;protein_coding;protein_coding;protein_coding	ENST00000240304.4;ENST00000393227.5;ENST00000504563.5;ENST00000505619.4;ENST00000505658.4;ENST00000506686.4;ENST00000507200.4;ENST00000508045.4;ENST00000508218.4;ENST00000508482.4;ENST00000509335.4;ENST00000510984.4;ENST00000625349.1	-450;-446;-446;-476;-391;-445;-649;-417;-444;-476;-445;-494;-412	CGI:chr17:50719389-50719956	N_Shore
cg07999201	0.451703	0.830926	-0.379223	1.37513e-17	5.51944e-20	chr4	16585498	16585499	LDB2;LDB2;LDB2;LDB2;LDB2;LDB2;LDB2;LDB2	protein_coding;protein_coding;protein_coding;protein_coding;protein_coding;protein_coding;protein_coding;protein_coding	ENST00000304523.8;ENST00000441778.5;ENST00000502640.4;ENST00000503153.4;ENST00000507464.4;ENST00000508918.4;ENST00000512345.4;ENST00000515064.4	313312;313097;313137;68322;10378;313137;313124;313065	CGI:chr4:16360793-16361143	.
cg03281194	0.424074	0.802806	-0.378731	2.61021e-20	2.29706e-22	chr1	2860407	2860408	.	.	.	.	CGI:chr1:2860592-2860796	N_Shore
cg01009920	0.431652	0.810228	-0.378576	1.11287e-15	2.60016e-18	chr8	8296128	8296129	.	.	.	.	CGI:chr8:8318177-8318663	.
cg07159802	0.472235	0.850796	-0.378562	3.18403e-13	3.76936e-16	chr1	247758266	247758267	OR1C1	protein_coding	ENST00000408896.3	141	CGI:chr1:247857028-247857950	.
cg21526778	0.484629	0.863092	-0.378464	1.17278e-09	5.80215e-13	chr1	243421559	243421560	SDCCAG8;SDCCAG8;SDCCAG8	protein_coding;protein_coding;protein_coding	ENST00000366541.6;ENST00000435549.1;ENST00000463042.1	165502;135175;3541	CGI:chr1:243474337-243474840	.
cg20326647	0.477994	0.855989	-0.377995	5.51282e-24	1.81172e-25	chr8	143738539	143738540	FAM83H-AS1;FAM83H-AS1	lincRNA;lincRNA	ENST00000533004.4;ENST00000534398.1	4398;-858	CGI:chr8:143738499-143738739	Island
cg23044087	0.453821	0.831595	-0.377774	9.69049e-21	9.77427e-23	chr15	96785548	96785549	SPATA8;SPATA8	protein_coding;protein_coding	ENST00000328504.3;ENST00000560327.1	2158;2060	CGI:chr15:96416111-96417301	.
cg06609496	0.429978	0.807648	-0.377671	9.61159e-16	2.29003e-18	chr5	1174311	1174312	CTD-3080P12.3	antisense	ENST00000514376.1	4295	CGI:chr5:1170587-1170826	S_Shelf
cg20431748	0.427897	0.805465	-0.377568	1.27901e-16	3.84913e-19	chr1	179586864	179586865	RP11-545A16.3	processed_pseudogene	ENST00000427215.2	158	CGI:chr1:179586229-179586915	Island
cg21643429	0.492898	0.870268	-0.37737	9.10441e-12	7.4054e-15	chr15	27970897	27970898	OCA2;OCA2	protein_coding;protein_coding	ENST00000353809.8;ENST00000354638.6	128416;128462	CGI:chr15:28003423-28004020	.
cg25668093	0.413474	0.790794	-0.37732	3.14595e-21	3.85668e-23	chr15	94856050	94856051	CTD-2576F9.1;CTD-2576F9.2;RP11-255M2.3;RP11-255M2.3;RP11-255M2.3;RP11-255M2.3;RP11-255M2.3	processed_pseudogene;lincRNA;lincRNA;lincRNA;lincRNA;lincRNA;lincRNA	ENST00000565166.2;ENST00000602330.1;ENST00000614581.1;ENST00000615751.3;ENST00000618377.1;ENST00000618611.3;ENST00000621842.3	575;962;-799;-741;-485;14990;-738	CGI:chr15:94856140-94856595	N_Shore
cg25855592	0.408489	0.785783	-0.377295	2.22312e-17	8.4346e-20	chr4	1494566	1494567	.	.	.	.	CGI:chr4:1492815-1493026	S_Shore
cg06265811	0.556871	0.93411	-0.37724	2.47741e-11	1.804e-14	chr11	78185881	78185882	KCTD21;KCTD21;KCTD21;KCTD21;KCTD21	protein_coding;protein_coding;protein_coding;protein_coding;protein_coding	ENST00000340067.3;ENST00000526208.4;ENST00000528776.1;ENST00000529350.1;ENST00000530018.4	2942;2708;2744;2738;2744	CGI:chr11:78188518-78188944	N_Shelf
cg23318967	0.438634	0.81587	-0.377236	3.12542e-13	3.70875e-16	chr7	4712242	4712243	FOXK1	protein_coding	ENST00000328914.4	29932	CGI:chr7:4718171-4718406	.
cg18958693	0.479944	0.857088	-0.377144	4.32372e-12	3.82668e-15	chr7	1567965	1567966	PSMG3;PSMG3;PSMG3	protein_coding;protein_coding;protein_coding	ENST00000252329.3;ENST00000288607.2;ENST00000404674.6	3041;2029;2081	CGI:chr7:1569789-1570401	N_Shore
cg18813527	0.330072	0.70696	-0.376889	1.59295e-21	2.14436e-23	chr8	1460077	1460078	.	.	.	.	CGI:chr8:1456718-1456928	S_Shelf
cg11303839	0.284233	0.661072	-0.376839	3.33747e-16	9.00628e-19	chr7	75776649	75776650	CCL26	protein_coding	ENST00000394905.2	13248	CGI:chr7:75738744-75739760	.
cg24694502	0.492471	0.869255	-0.376783	5.24175e-15	1.00609e-17	chr1	4676127	4676128	AJAP1;AJAP1	protein_coding;protein_coding	ENST00000378190.6;ENST00000378191.4	21394;21081	CGI:chr1:4666516-4666807	.
cg09044294	0.421359	0.798108	-0.376748	1.87198e-21	2.47243e-23	chr2	50007395	50007396	NRXN1;NRXN1;NRXN1;NRXN1;NRXN1;NRXN1;NRXN1;NRXN1;NRXN1;NRXN1;NRXN1;NRXN1	protein_coding;protein_coding;protein_coding;protein_coding;protein_coding;protein_coding;protein_coding;protein_coding;protein_coding;protein_coding;protein_coding;protein_coding	ENST00000342183.8;ENST00000401669.5;ENST00000401710.4;ENST00000404971.4;ENST00000405472.6;ENST00000406316.5;ENST00000484192.2;ENST00000611589.3;ENST00000625672.1;ENST00000628364.1;ENST00000629717.1;ENST00000630543.1	340360;1024806;340372;1025005;1024720;1025167;9151;339860;1021062;340402;11881;1020879	CGI:chr2:50346903-50347679	.
cg16452248	0.562705	0.939352	-0.376647	1.12096e-11	8.87863e-15	chr16	563526	563527	PRR35	protein_coding	ENST00000409413.3	3103	CGI:chr16:564792-565095	N_Shore
cg12346967	0.419626	0.796245	-0.376619	1.18837e-20	1.18162e-22	chr21	30813013	30813014	KRTAP8-1	protein_coding	ENST00000329621.5	240	CGI:chr21:31251828-31252066	.
cg10880599	0.486143	0.862668	-0.376525	2.16517e-13	2.6773e-16	chr14	64941762	64941763	CHURC1;CHURC1;CHURC1-FNTB;CHURC1-FNTB;CHURC1-FNTB;CHURC1-FNTB;GPX2;GPX2;GPX2;GPX2;GPX2	protein_coding;protein_coding;protein_coding;protein_coding;protein_coding;protein_coding;protein_coding;protein_coding;protein_coding;protein_coding;protein_coding	ENST00000551093.4;ENST00000551947.4;ENST00000549987.1;ENST00000551823.1;ENST00000552941.4;ENST00000553743.4;ENST00000389614.5;ENST00000553522.1;ENST00000557049.1;ENST00000557323.1;ENST00000612794.1	27284;27318;27268;17725;27276;17725;1052;984;959;985;1144	CGI:chr14:64914357-64914664	.
cg26547526	0.486481	0.862567	-0.376086	3.87248e-11	2.694e-14	chr10	2624551	2624552	.	.	.	.	CGI:chr10:2521547-2523030	.
cg08196512	0.461557	0.837627	-0.376069	3.35236e-17	1.20218e-19	chr22	38110730	38110731	BAIAP2L2;BAIAP2L2	protein_coding;protein_coding	ENST00000332536.8;ENST00000381669.6	-84;-59	CGI:chr22:38120728-38121023	.
cg08097817	0.484892	0.860937	-0.376045	2.30153e-15	4.9178e-18	chr21	30882994	30882995	KRTAP11-1	protein_coding	ENST00000332378.5	-1438	CGI:chr21:31251828-31252066	.
cg25820728	0.295124	0.671086	-0.375962	2.13735e-22	3.85604e-24	chr7	1645070	1645071	.	.	.	.	CGI:chr7:1647080-1647372	N_Shelf
cg07048608	0.476128	0.852	-0.375871	5.70412e-15	1.08384e-17	chr1	158611250	158611251	SPTA1;SPTA1;SPTA1	protein_coding;protein_coding;protein_coding	ENST00000368147.7;ENST00000485680.1;ENST00000614909.3	75449;776;75449	CGI:chr1:158180830-158181713	.
cg15712304	0.44709	0.822935	-0.375845	6.29294e-16	1.58399e-18	chr11	125357593	125357594	PKNOX2;PKNOX2;PKNOX2;PKNOX2;PKNOX2;PKNOX2;PKNOX2;PKNOX2;PKNOX2;PKNOX2;PKNOX2;PKNOX2	protein_coding;protein_coding;protein_coding;protein_coding;protein_coding;protein_coding;protein_coding;protein_coding;protein_coding;protein_coding;protein_coding;protein_coding	ENST00000298282.12;ENST00000527238.4;ENST00000530517.4;ENST00000531116.4;ENST00000531212.4;ENST00000532623.4;ENST00000557814.4;ENST00000558705.1;ENST00000558729.4;ENST00000559662.4;ENST00000561115.4;ENST00000561298.1	192886;192857;192905;192897;173405;192838;192864;27333;117529;192866;117519;25979	CGI:chr11:125495241-125496423	.
cg17514199	0.329693	0.705461	-0.375768	3.0391e-17	1.10169e-19	chr1	237888151	237888152	RP11-193H5.1;ZP4;ZP4	antisense;protein_coding;protein_coding	ENST00000450451.1;ENST00000366570.4;ENST00000611898.3	25975;2644;2772	CGI:chr1:237783887-237784148	.
cg00067742	0.469779	0.845447	-0.375668	1.40972e-13	1.83486e-16	chr2	1923116	1923117	MYT1L;MYT1L;MYT1L	protein_coding;protein_coding;protein_coding	ENST00000399161.5;ENST00000428368.5;ENST00000602387.4	408079;408001;-385	CGI:chr2:1937296-1937788	.
cg04638205	0.473348	0.848879	-0.375532	1.45421e-13	1.88648e-16	chr5	3002379	3002380	.	.	.	.	CGI:chr5:2866585-2866891	.
cg08012275	0.547446	0.922944	-0.375498	1.2406e-13	1.64039e-16	chr11	1443070	1443071	BRSK2;BRSK2;BRSK2;BRSK2;BRSK2;BRSK2;BRSK2;BRSK2;BRSK2;BRSK2	protein_coding;protein_coding;protein_coding;protein_coding;protein_coding;protein_coding;protein_coding;protein_coding;protein_coding;protein_coding	ENST00000308219.12;ENST00000382179.4;ENST00000524702.4;ENST00000526678.4;ENST00000528710.4;ENST00000528841.4;ENST00000529433.4;ENST00000529951.4;ENST00000531078.1;ENST00000531197.4	53170;31917;33310;52784;32626;53168;53168;2270;624;53168	CGI:chr11:1443065-1443694	Island
cg20312687	0.405802	0.781269	-0.375467	4.94134e-16	1.26995e-18	chr20	31368782	31368783	DEFB118	protein_coding	ENST00000253381.2	163	CGI:chr20:31475246-31475478	.
cg24180759	0.37905	0.754427	-0.375377	4.06307e-20	3.41025e-22	chr5	168124229	168124230	CTB-178M22.1;TENM2;TENM2;TENM2;TENM2;TENM2	antisense;protein_coding;protein_coding;protein_coding;protein_coding;protein_coding	ENST00000517408.1;ENST00000403607.2;ENST00000518659.4;ENST00000519204.4;ENST00000520394.4;ENST00000545108.4	63491;248243;839429;369292;369225;248243	CGI:chr5:168262222-168262733	.
cg08944086	0.536109	0.911447	-0.375338	3.92739e-09	1.73908e-12	chr10	1183140	1183141	ADARB2;ADARB2;ADARB2;ADARB2	protein_coding;protein_coding;protein_coding;protein_coding	ENST00000381310.6;ENST00000381312.4;ENST00000474762.4;ENST00000490172.1	17221;554337;3427;5107	CGI:chr10:1184873-1185274	N_Shore
cg14148690	0.514329	0.88963	-0.375301	2.07463e-11	1.54002e-14	chr2	910989	910990	AC113607.3	antisense	ENST00000427019.1	10136	CGI:chr2:950000-951600	.
cg26738880	0.431256	0.806506	-0.37525	1.37684e-19	9.95649e-22	chr7	154637322	154637323	DPP6;DPP6;DPP6;DPP6	protein_coding;protein_coding;protein_coding;protein_coding	ENST00000332007.6;ENST00000377770.6;ENST00000404039.4;ENST00000427557.1	332211;584641;750224;331879	CGI:chr7:154750349-154750638	.
cg08483912	0.595785	0.970833	-0.375048	4.44966e-11	3.05639e-14	chr10	130833778	130833779	.	.	.	.	CGI:chr10:130785456-130785900	.
cg01053241	0.46619	0.841141	-0.374951	3.90959e-15	7.78581e-18	chr8	17495325	17495326	.	.	.	.	CGI:chr8:17496812-17497741	N_Shore
cg02077084	0.40801	0.782341	-0.374331	2.91452e-17	1.06214e-19	chr1	248386640	248386641	OR2T6	protein_coding	ENST00000355728.2	-970	CGI:chr1:248691729-248692169	.
cg20534702	0.389152	0.763407	-0.374255	2.21771e-17	8.42321e-20	chr7	4712539	4712540	FOXK1	protein_coding	ENST00000328914.4	30229	CGI:chr7:4718171-4718406	.
cg09163412	0.516737	0.890795	-0.374058	5.88082e-13	6.50945e-16	*	-1	-1	.	.	.	.	.	.
cg24755177	0.544764	0.9188	-0.374036	1.39471e-11	1.07997e-14	chr19	54339374	54339375	LILRA4;LILRA4	protein_coding;protein_coding	ENST00000291759.4;ENST00000421056.2	-223;-268	CGI:chr19:54415229-54415654	.
cg04674428	0.477123	0.851041	-0.373918	4.17013e-16	1.09357e-18	chr16	58922397	58922398	RP11-410D17.2	lincRNA	ENST00000500117.1	172758	CGI:chr16:58733543-58734424	.
cg22348992	0.425433	0.799321	-0.373888	9.10933e-09	3.75803e-12	chr20	63348211	63348212	CHRNA4;CHRNA4;CHRNA4;CHRNA4;CHRNA4;CHRNA4;CHRNA4	protein_coding;protein_coding;protein_coding;protein_coding;protein_coding;protein_coding;protein_coding	ENST00000370263.7;ENST00000463705.4;ENST00000467563.2;ENST00000498043.5;ENST00000615287.3;ENST00000627000.1;ENST00000631289.1	13133;29783;13094;11489;13186;13094;-1275	CGI:chr20:63347973-63348221	Island
cg26151206	0.516789	0.890546	-0.373758	1.49549e-12	1.48615e-15	chr1	158420859	158420860	OR10K2	protein_coding	ENST00000314902.2	8	CGI:chr1:158180830-158181713	.
cg17144184	0.44286	0.81659	-0.37373	3.88421e-16	1.02563e-18	chr8	142140138	142140139	.	.	.	.	CGI:chr8:142121293-142121507	.
cg00830435	0.555989	0.929697	-0.373708	1.93158e-13	2.42269e-16	chr1	3001962	3001963	.	.	.	.	CGI:chr1:3001801-3002189	Island
cg01900006	0.459348	0.832975	-0.373627	2.70681e-13	3.25953e-16	chr16	88748205	88748206	PIEZO1	protein_coding	ENST00000301015.12	37007	CGI:chr16:88749450-88749687	N_Shore
cg18766755	0.38849	0.761982	-0.373492	4.43416e-15	8.66958e-18	chr1	153057463	153057464	SPRR2A	protein_coding	ENST00000392653.2	75	CGI:chr1:153260996-153261837	.
cg18847089	0.583109	0.956588	-0.373478	2.69267e-11	1.94718e-14	chr7	636423	636424	PRKAR1B;PRKAR1B;PRKAR1B;PRKAR1B;PRKAR1B;PRKAR1B;PRKAR1B;PRKAR1B	protein_coding;protein_coding;protein_coding;protein_coding;protein_coding;protein_coding;protein_coding;protein_coding	ENST00000360274.7;ENST00000403562.4;ENST00000406797.4;ENST00000414568.4;ENST00000417852.4;ENST00000430040.4;ENST00000537384.4;ENST00000544935.4	76150;91228;76785;55372;90919;76518;90919;76518	CGI:chr7:635932-636458	Island
cg01442005	0.41955	0.792994	-0.373444	5.28991e-15	1.01423e-17	chr17	49101916	49101917	.	.	.	.	CGI:chr17:49132449-49133378	.
cg21769702	0.525587	0.898971	-0.373384	1.45783e-10	8.83839e-14	chr11	127941694	127941695	RP11-676M6.1	processed_pseudogene	ENST00000526843.2	-39	CGI:chr11:128451766-128452000	.
cg10857729	0.429836	0.803091	-0.373255	2.9914e-11	2.13753e-14	*	-1	-1	.	.	.	.	.	.
cg00355019	0.500641	0.87384	-0.373199	2.18994e-16	6.18378e-19	chr11	120124169	120124170	TRIM29;TRIM29;TRIM29;TRIM29;TRIM29;TRIM29;TRIM29;TRIM29;TRIM29	protein_coding;protein_coding;protein_coding;protein_coding;protein_coding;protein_coding;protein_coding;protein_coding;protein_coding	ENST00000341846.8;ENST00000475051.3;ENST00000524816.6;ENST00000525327.4;ENST00000528870.4;ENST00000529044.4;ENST00000530470.1;ENST00000531555.4;ENST00000533302.4	14285;13946;-897;-726;1410;4745;2189;-1135;-1136	CGI:chr11:120137338-120138002	.
cg24627789	0.434891	0.808086	-0.373194	2.55597e-16	7.1112e-19	chr8	1390297	1390298	.	.	.	.	CGI:chr8:1393054-1394000	N_Shelf
cg22714290	0.51783	0.890369	-0.372539	2.25966e-08	8.72744e-12	chr1	207819203	207819204	C1orf132;C1orf132	lincRNA;lincRNA	ENST00000487977.1;ENST00000608023.4	3501;49948	CGI:chr1:207868517-207869373	.
cg07691684	0.41575	0.788284	-0.372534	3.74122e-23	8.70051e-25	chr4	16772054	16772055	LDB2;LDB2;LDB2;LDB2;LDB2;LDB2;LDB2;LDB2;LDB2;LDB2	protein_coding;protein_coding;protein_coding;protein_coding;protein_coding;protein_coding;protein_coding;protein_coding;protein_coding;protein_coding	ENST00000304523.8;ENST00000441778.5;ENST00000502640.4;ENST00000504189.1;ENST00000506732.1;ENST00000508918.4;ENST00000510825.4;ENST00000512345.4;ENST00000513457.4;ENST00000515064.4	126756;126541;126581;126325;126607;126581;126625;126568;54507;126509	CGI:chr4:16360793-16361143	.
cg13663644	0.478826	0.851265	-0.372439	6.193e-13	6.8216e-16	chr9	990692	990693	DMRT3	protein_coding	ENST00000190165.2	13727	CGI:chr9:998463-999034	.
cg09248613	0.433416	0.805693	-0.372277	3.86365e-13	4.4874e-16	chr1	210687898	210687899	KCNH1;KCNH1	protein_coding;protein_coding	ENST00000271751.7;ENST00000367007.4	446076;446218	CGI:chr1:210683717-210683920	S_Shelf
cg24917359	0.391469	0.763734	-0.372266	2.65089e-17	9.83372e-20	chr17	79048173	79048174	C1QTNF1;C1QTNF1;C1QTNF1;C1QTNF1;C1QTNF1;C1QTNF1;C1QTNF1;C1QTNF1;C1QTNF1;C1QTNF1;C1QTNF1	protein_coding;protein_coding;protein_coding;protein_coding;protein_coding;protein_coding;protein_coding;protein_coding;protein_coding;protein_coding;protein_coding	ENST00000311661.4;ENST00000339142.5;ENST00000354124.6;ENST00000392445.5;ENST00000578229.4;ENST00000579760.4;ENST00000580454.4;ENST00000580474.1;ENST00000581774.4;ENST00000582625.1;ENST00000583904.4	23911;24001;25238;22509;25358;24102;25201;4579;13987;1271;6446	CGI:chr17:79047659-79048407	Island
cg17033333	0.524111	0.896338	-0.372227	7.0501e-11	4.60189e-14	chr5	2260928	2260929	RP11-24P24.1	processed_pseudogene	ENST00000610958.1	-932	CGI:chr5:2180137-2180353	.
cg06968859	0.322176	0.694376	-0.372199	1.01282e-13	1.36712e-16	chr2	80497084	80497085	CTNNA2;CTNNA2;CTNNA2;CTNNA2;CTNNA2;CTNNA2;CTNNA2;CTNNA2;CTNNA2;CTNNA2;CTNNA2	protein_coding;protein_coding;protein_coding;protein_coding;protein_coding;protein_coding;protein_coding;protein_coding;protein_coding;protein_coding;protein_coding	ENST00000343114.6;ENST00000361291.7;ENST00000402739.7;ENST00000409550.2;ENST00000465616.1;ENST00000466387.4;ENST00000493024.4;ENST00000496558.4;ENST00000540488.4;ENST00000541047.4;ENST00000629316.1	183704;183704;845531;168808;118396;1311852;191965;984083;183704;191978;983948	CGI:chr2:80322453-80322673	.
cg10255237	0.240508	0.612629	-0.372121	1.24688e-21	1.75264e-23	chr12	89756845	89756846	.	.	.	.	CGI:chr12:89707659-89710288	.
cg19335742	0.43371	0.805823	-0.372114	7.52269e-11	4.88124e-14	chr15	40274679	40274680	PAK6;PAK6;PAK6;PAK6;PAK6;PAK6;PAK6;PAK6;PAK6;PAK6	protein_coding;protein_coding;protein_coding;protein_coding;protein_coding;protein_coding;protein_coding;protein_coding;protein_coding;protein_coding	ENST00000260404.7;ENST00000441369.4;ENST00000453867.4;ENST00000455577.5;ENST00000542403.3;ENST00000557808.1;ENST00000558658.4;ENST00000558965.4;ENST00000559936.4;ENST00000560346.4	34808;57250;57250;35587;21494;748;57091;57250;57229;35258	CGI:chr15:40279877-40280557	.
cg07280182	0.426849	0.798959	-0.37211	1.41555e-16	4.21653e-19	chr22	49416626	49416627	C22orf34;C22orf34	lincRNA;lincRNA	ENST00000414287.4;ENST00000498829.1	240879;8812	CGI:chr22:49418453-49418819	N_Shore
cg23413527	0.501368	0.873219	-0.371851	1.18343e-14	2.05304e-17	chr15	94602064	94602065	.	.	.	.	CGI:chr15:94844772-94845407	.
cg24000437	0.316914	0.688527	-0.371612	3.23975e-22	5.51782e-24	chr1	152566381	152566382	LCE3C;LCE3E	protein_coding;protein_coding	ENST00000617545.1;ENST00000368789.1	54845;392	CGI:chr1:152515581-152515794	.
cg25141766	0.563632	0.935039	-0.371407	3.17877e-13	3.7644e-16	chr17	81868440	81868441	ARHGDIA;ARHGDIA;ARHGDIA;ARHGDIA;ARHGDIA;ARHGDIA;RP11-498C9.3	protein_coding;protein_coding;protein_coding;protein_coding;protein_coding;protein_coding;antisense	ENST00000269321.10;ENST00000400721.7;ENST00000541078.5;ENST00000580685.4;ENST00000582520.1;ENST00000584461.4;ENST00000576554.1	2967;2937;2535;1567;191;2890;717	CGI:chr17:81868928-81869799	N_Shore
cg04902327	0.438276	0.809668	-0.371392	1.04195e-16	3.22015e-19	chr1	247855932	247855933	TRIM58	protein_coding	ENST00000366481.3	-1268	CGI:chr1:247857028-247857950	N_Shore
cg08465307	0.34169	0.712852	-0.371162	6.23123e-13	6.85719e-16	chr1	3910517	3910518	LINC01134;LINC01134	lincRNA;lincRNA	ENST00000439488.1;ENST00000442673.1	10100;10112	CGI:chr1:3907655-3907892	S_Shelf
cg10574843	0.509176	0.880269	-0.371093	3.03817e-17	1.10169e-19	chr11	1973672	1973673	MRPL23	protein_coding	ENST00000397297.6	26339	CGI:chr11:1969669-1969981	S_Shelf
cg16602816	0.427125	0.798099	-0.370974	2.41199e-14	3.84337e-17	chr5	2335609	2335610	.	.	.	.	CGI:chr5:2180137-2180353	.
cg18744355	0.536844	0.907773	-0.370928	6.12187e-11	4.0596e-14	chr2	1903177	1903178	MYT1L;MYT1L;MYT1L;MYT1L;MYT1L	protein_coding;protein_coding;protein_coding;protein_coding;protein_coding	ENST00000399161.5;ENST00000428368.5;ENST00000485547.1;ENST00000490585.1;ENST00000602387.4	428018;427940;8899;-49;19554	CGI:chr2:1891925-1892160	.
cg13636096	0.545875	0.916503	-0.370628	4.00456e-14	6.03356e-17	chr10	2772823	2772824	.	.	.	.	CGI:chr10:2772811-2773277	Island
cg27457631	0.437851	0.808407	-0.370556	2.91795e-16	7.98189e-19	chr2	484237	484238	.	.	.	.	CGI:chr2:487884-488610	N_Shelf
cg11401293	0.554332	0.924595	-0.370262	4.34615e-09	1.90477e-12	chr21	45984354	45984355	COL6A1;COL6A1	protein_coding;protein_coding	ENST00000361866.6;ENST00000612273.1	2616;2584	CGI:chr21:45984194-45984398	Island
cg16530128	0.442714	0.812501	-0.369787	4.57455e-21	5.18153e-23	chr11	2904721	2904722	SLC22A18;SLC22A18;SLC22A18;SLC22A18;SLC22A18;SLC22A18;SLC22A18AS;SLC22A18AS	protein_coding;protein_coding;protein_coding;protein_coding;protein_coding;protein_coding;antisense;antisense	ENST00000312221.8;ENST00000347936.5;ENST00000380574.4;ENST00000449793.5;ENST00000485423.1;ENST00000492567.2;ENST00000455942.3;ENST00000625099.2	2527;4999;2300;2437;1606;1344;-1230;-980	CGI:chr11:2902071-2902587	S_Shelf
cg01736164	0.532648	0.902043	-0.369395	1.13694e-08	4.61876e-12	chr14	97457980	97457981	CTD-2506J14.1;CTD-2506J14.1;CTD-2506J14.1	lincRNA;lincRNA;lincRNA	ENST00000499910.2;ENST00000554260.1;ENST00000554862.1	-891;-852;-837	CGI:chr14:97218722-97219609	.
cg03384920	0.34019	0.709584	-0.369394	2.77023e-18	1.36946e-20	chr2	79360182	79360183	CTNNA2	protein_coding	ENST00000466387.4	174950	CGI:chr2:79512570-79513117	.
cg21312148	0.408239	0.777591	-0.369352	3.34078e-13	3.93827e-16	chr1	152663598	152663599	LCE2D	protein_coding	ENST00000368784.1	201	CGI:chr1:152515581-152515794	.
cg10907582	0.443635	0.812932	-0.369297	1.44226e-19	1.03547e-21	chr14	95945063	95945064	.	.	.	.	CGI:chr14:95875872-95877233	.
cg00602245	0.539689	0.908955	-0.369265	3.02153e-18	1.477e-20	chr8	1003031	1003032	ERICH1-AS1;ERICH1-AS1;ERICH1-AS1	antisense;antisense;antisense	ENST00000522092.4;ENST00000524139.4;ENST00000578889.1	265379;119832;119702	CGI:chr8:1006288-1007205	N_Shelf
cg09527769	0.446806	0.815881	-0.369076	9.81704e-19	5.47564e-21	chr4	189661302	189661303	LINC01262	lincRNA	ENST00000513681.1	1696	CGI:chr4:189645395-189646568	.
cg12921481	0.481479	0.850481	-0.369003	3.52864e-15	7.14051e-18	chr1	158777487	158777488	OR6N2	protein_coding	ENST00000339258.1	149	CGI:chr1:159171412-159171928	.
cg26345619	0.553146	0.922084	-0.368938	8.58786e-13	9.10834e-16	chr12	2493239	2493240	CACNA1C;CACNA1C;CACNA1C;CACNA1C;CACNA1C;CACNA1C;CACNA1C;CACNA1C;CACNA1C;CACNA1C;CACNA1C;CACNA1C;CACNA1C;CACNA1C;CACNA1C;CACNA1C;CACNA1C;CACNA1C;CACNA1C;CACNA1C;CACNA1C;CACNA1C;CACNA1C;CACNA1C;CACNA1C;CACNA1C;CACNA1C;CACNA1C	protein_coding;protein_coding;protein_coding;protein_coding;protein_coding;protein_coding;protein_coding;protein_coding;protein_coding;protein_coding;protein_coding;protein_coding;protein_coding;protein_coding;protein_coding;protein_coding;protein_coding;protein_coding;protein_coding;protein_coding;protein_coding;protein_coding;protein_coding;protein_coding;protein_coding;protein_coding;protein_c…	ENST00000327702.10;ENST00000335762.8;ENST00000344100.6;ENST00000347598.7;ENST00000399591.4;ENST00000399595.4;ENST00000399597.4;ENST00000399601.4;ENST00000399603.4;ENST00000399606.4;ENST00000399617.4;ENST00000399621.4;ENST00000399629.4;ENST00000399634.4;ENST00000399637.4;ENST00000399638.4;ENST00000399641.4;ENST00000399644.4;ENST00000399649.4;ENST00000399655.4;ENST00000402845.6;ENST00000406454.6;EN…	439675;439940;439675;439675;439675;439675;439675;439675;439675;439675;439675;439675;439675;439675;439675;439675;439675;439675;439675;439940;439675;439675;439700;44262;44262;44262;44262;44262	CGI:chr12:2679448-2679713	.
cg02367160	0.379489	0.748408	-0.368919	3.2732e-21	3.99171e-23	chr5	167187879	167187880	.	.	.	.	CGI:chr5:166978479-166978687	.
cg20558091	0.509353	0.878265	-0.368911	3.84868e-11	2.67987e-14	chr17	81148498	81148499	AATK;AATK;AATK	protein_coding;protein_coding;protein_coding	ENST00000326724.7;ENST00000374792.5;ENST00000572798.1	17520;17575;17580	CGI:chr17:81158079-81158284	.
cg18126060	0.378149	0.746771	-0.368623	2.02707e-17	7.77506e-20	chr12	4814264	4814265	GALNT8;GALNT8;GALNT8	protein_coding;protein_coding;protein_coding	ENST00000433855.1;ENST00000541339.2;ENST00000542998.4	5087;-74;50919	CGI:chr12:4809107-4810491	S_Shelf
cg20825022	0.346702	0.715145	-0.368443	6.63464e-21	7.07965e-23	chr2	124163068	124163069	CNTNAP5	protein_coding	ENST00000431078.1	137780	CGI:chr2:124024675-124025678	.
cg14646111	0.580211	0.94863	-0.368419	2.80883e-08	1.06649e-11	chr20	18509016	18509017	SEC23B;SEC23B;SEC23B;SEC23B;SEC23B;SEC23B	protein_coding;protein_coding;protein_coding;protein_coding;protein_coding;protein_coding	ENST00000262544.5;ENST00000336714.6;ENST00000377465.4;ENST00000377475.6;ENST00000450074.4;ENST00000474619.1	1460;1460;953;1436;1522;1082	CGI:chr20:18507440-18508160	S_Shore
cg12422154	0.329203	0.697616	-0.368412	6.10755e-22	9.35511e-24	chr6	30163042	30163043	TRIM15;TRIM15;TRIM15	protein_coding;protein_coding;protein_coding	ENST00000376688.2;ENST00000376694.7;ENST00000619857.3	-644;-175;-165	CGI:chr6:30171941-30172486	.
cg20812354	0.411921	0.780238	-0.368317	1.11531e-15	2.60499e-18	chr1	248180015	248180016	OR2M2	protein_coding	ENST00000359682.2	28	CGI:chr1:247937023-247937424	.
cg26530341	0.433133	0.801419	-0.368286	1.33037e-14	2.27414e-17	chr8	23225840	23225841	RP11-1149O23.3;RP11-1149O23.3;RP11-1149O23.3;RP11-1149O23.4;TNFRSF10A;TNFRSF10A;TNFRSF10A	processed_transcript;processed_transcript;processed_transcript;antisense;protein_coding;protein_coding;protein_coding	ENST00000500853.1;ENST00000517774.1;ENST00000522600.1;ENST00000511929.2;ENST00000221132.6;ENST00000524158.4;ENST00000613472.1	618;1368;205;5076;-713;-1239;-778	CGI:chr8:23224443-23225462	S_Shore
cg22157027	0.360021	0.728232	-0.368211	1.91231e-18	9.83554e-21	chr2	10497987	10497988	.	.	.	.	CGI:chr2:10526415-10526639	.
cg10326726	0.344617	0.712511	-0.367895	6.22378e-11	4.11665e-14	chr10	46046316	46046317	MSMB;MSMB	protein_coding;protein_coding	ENST00000581478.4;ENST00000582163.2	-46;-46	CGI:chr10:46030173-46030750	.
cg16058274	0.418284	0.786164	-0.36788	7.65787e-18	3.30691e-20	chr14	93713501	93713502	.	.	.	.	CGI:chr14:93787606-93789387	.
cg04001520	0.380969	0.748763	-0.367794	1.86063e-18	9.58382e-21	chr5	167561038	167561039	TENM2	protein_coding	ENST00000518659.4	276238	CGI:chr5:167858534-167858862	.
cg23230830	0.308623	0.676363	-0.367739	1.93682e-19	1.34102e-21	chr1	248739799	248739800	LYPD8;LYPD8	protein_coding;protein_coding	ENST00000566597.4;ENST00000590317.3	5481;15941	CGI:chr1:248746583-248748276	.
cg05543593	0.398313	0.766049	-0.367737	2.81893e-15	5.85187e-18	chr2	21289027	21289028	AC067959.1	lincRNA	ENST00000435237.1	67851	CGI:chr2:21043797-21044089	.
cg20837735	0.411304	0.779027	-0.367722	4.33493e-17	1.50295e-19	chr18	63476944	63476945	SERPINB5;SERPINB5;SERPINB5	protein_coding;protein_coding;protein_coding	ENST00000382771.7;ENST00000424602.1;ENST00000489441.4	182;-184;-15	CGI:chr18:63422029-63423124	.
cg06070002	0.481961	0.849677	-0.367716	6.12439e-14	8.72775e-17	chr1	45520448	45520449	PRDX1;PRDX1;PRDX1;PRDX1;PRDX1;PRDX1	protein_coding;protein_coding;protein_coding;protein_coding;protein_coding;protein_coding	ENST00000262746.4;ENST00000319248.11;ENST00000372079.1;ENST00000424390.1;ENST00000447184.4;ENST00000483583.1	1491;1509;1407;2600;1491;1420	CGI:chr1:45521491-45522131	N_Shore
cg10505902	0.427297	0.794914	-0.367617	1.2033e-15	2.7845e-18	chr1	148992362	148992363	PDE4DIP;PDE4DIP;PDE4DIP;PDE4DIP;PDE4DIP;PDE4DIP;PDE4DIP;PDE4DIP;PDE4DIP;PDE4DIP	protein_coding;protein_coding;protein_coding;protein_coding;protein_coding;protein_coding;protein_coding;protein_coding;protein_coding;protein_coding	ENST00000313431.12;ENST00000369349.6;ENST00000369351.6;ENST00000369354.6;ENST00000369356.7;ENST00000491426.3;ENST00000524974.4;ENST00000530062.4;ENST00000585156.4;ENST00000618462.3	40237;102752;102716;102797;102898;12566;183895;12601;183876;147979	CGI:chr1:148952011-148953149	.
cg05132999	0.418469	0.785987	-0.367518	4.1324e-22	6.77443e-24	chr1	51331315	51331316	TTC39A;TTC39A;TTC39A;TTC39A;TTC39A;TTC39A;TTC39A;TTC39A;TTC39A;TTC39A-AS1	protein_coding;protein_coding;protein_coding;protein_coding;protein_coding;protein_coding;protein_coding;protein_coding;protein_coding;antisense	ENST00000262675.10;ENST00000262676.8;ENST00000371747.6;ENST00000380849.5;ENST00000401051.6;ENST00000411642.5;ENST00000413473.5;ENST00000439482.4;ENST00000527205.1;ENST00000564479.4	-1141;32;-752;-1112;13802;-367;13802;-750;13802;1660	CGI:chr1:51330222-51330917	S_Shore
cg20646846	0.392254	0.759728	-0.367474	6.52954e-13	7.13945e-16	chr11	1652374	1652375	.	.	.	.	CGI:chr11:1652604-1652994	N_Shore
cg15651267	0.400517	0.767977	-0.36746	3.88785e-17	1.36965e-19	chr5	167601530	167601531	TENM2;TENM2	protein_coding;protein_coding	ENST00000518659.4;ENST00000520393.4	316730;27555	CGI:chr5:167858534-167858862	.
cg06405820	0.461427	0.82887	-0.367443	4.82535e-16	1.24456e-18	chr16	86917791	86917792	.	.	.	.	CGI:chr16:86931665-86931890	.
cg13782274	0.518019	0.885339	-0.36732	1.05933e-08	4.3248e-12	chr20	63466328	63466329	KCNQ2;KCNQ2;KCNQ2;KCNQ2;KCNQ2;KCNQ2;KCNQ2;KCNQ2;KCNQ2;KCNQ2	protein_coding;protein_coding;protein_coding;protein_coding;protein_coding;protein_coding;protein_coding;protein_coding;protein_coding;protein_coding	ENST00000344425.6;ENST00000344462.7;ENST00000359125.5;ENST00000360480.6;ENST00000370221.2;ENST00000370224.4;ENST00000625514.1;ENST00000626839.1;ENST00000629241.1;ENST00000629676.1	6313;6182;6263;6178;6262;6271;6228;6350;6228;6228	CGI:chr20:63465840-63466901	Island
cg17737409	0.385233	0.752466	-0.367234	1.09725e-08	4.46841e-12	chr1	230114263	230114264	GALNT2;GALNT2	protein_coding;protein_coding	ENST00000366672.4;ENST00000494106.1	47053;56272	CGI:chr1:230066747-230068462	.
cg14766621	0.518939	0.885886	-0.366947	6.68528e-10	3.48114e-13	chr2	1887285	1887286	MYT1L;MYT1L;MYT1L;MYT1L;MYT1L	protein_coding;protein_coding;protein_coding;protein_coding;protein_coding	ENST00000399161.5;ENST00000428368.5;ENST00000470954.1;ENST00000490585.1;ENST00000602387.4	443910;443832;221;15843;35446	CGI:chr2:1891925-1892160	.
cg01140416	0.452036	0.81897	-0.366934	1.938e-12	1.86782e-15	chr7	1253993	1253994	.	.	.	.	CGI:chr7:1246475-1248022	.
cg15142042	0.451171	0.818102	-0.366931	1.2487e-13	1.64891e-16	chr5	3963163	3963164	.	.	.	.	CGI:chr5:3962172-3962398	S_Shore
cg01603862	0.382714	0.749537	-0.366823	3.61871e-19	2.29864e-21	chr8	1091336	1091337	ERICH1-AS1;ERICH1-AS1	antisense;antisense	ENST00000522092.4;ENST00000578889.1	353684;208007	CGI:chr8:1098559-1098873	.
cg20676475	0.416663	0.783462	-0.366799	4.33042e-16	1.12939e-18	chr1	152580018	152580019	LCE3C;LCE3D	protein_coding;protein_coding	ENST00000617545.1;ENST00000368787.3	68482;487	CGI:chr1:152515581-152515794	.
cg12680131	0.521383	0.888163	-0.36678	4.21339e-08	1.55435e-11	chr2	1413381	1413382	TPO;TPO;TPO;TPO;TPO;TPO;TPO;TPO;TPO	protein_coding;protein_coding;protein_coding;protein_coding;protein_coding;protein_coding;protein_coding;protein_coding;protein_coding	ENST00000329066.7;ENST00000345913.7;ENST00000346956.6;ENST00000382198.4;ENST00000382201.6;ENST00000382269.6;ENST00000423320.4;ENST00000497517.5;ENST00000539820.4	-84;-81;-1028;-1029;-100;-81;-1002;39157;-81	CGI:chr2:1476986-1477859	.
cg05098512	0.376966	0.743658	-0.366692	4.75297e-19	2.91849e-21	chr10	133047579	133047580	.	.	.	.	CGI:chr10:133047670-133048064	N_Shore
cg18223770	0.477646	0.844305	-0.366658	9.89622e-15	1.7542e-17	chr2	132417824	132417825	GPR39;GPR39	protein_coding;protein_coding	ENST00000329321.3;ENST00000622084.1	1249;780	CGI:chr2:132417587-132417871	Island
cg09192940	0.503172	0.869817	-0.366644	1.51986e-09	7.33371e-13	chr16	268695	268696	AC004754.3;ARHGDIG;ARHGDIG;ARHGDIG;ITFG3;RGS11;RGS11;RGS11;RGS11	protein_coding;protein_coding;protein_coding;protein_coding;protein_coding;protein_coding;protein_coding;protein_coding;protein_coding	ENST00000600536.1;ENST00000412541.4;ENST00000435035.4;ENST00000464609.1;ENST00000301679.5;ENST00000168869.11;ENST00000316163.8;ENST00000397770.6;ENST00000477143.4	19147;-33;-33;-288;33892;7246;7220;7235;6262	CGI:chr16:268618-268902	Island
cg11666040	0.565279	0.93192	-0.366641	1.84947e-10	1.09334e-13	chr10	133198950	133198951	KNDC1;KNDC1	protein_coding;protein_coding	ENST00000304613.6;ENST00000368571.2	38502;31765	CGI:chr10:133201199-133201898	N_Shelf
cg20947259	0.512542	0.87914	-0.366598	1.56317e-12	1.54551e-15	chr1	201603031	201603032	.	.	.	.	CGI:chr1:201647913-201650660	.
cg02065293	0.480936	0.847457	-0.366521	1.87928e-16	5.39359e-19	chr2	1924708	1924709	MYT1L;MYT1L	protein_coding;protein_coding	ENST00000399161.5;ENST00000428368.5	406487;406409	CGI:chr2:1937296-1937788	.
cg14679444	0.521645	0.888115	-0.36647	2.54844e-14	4.03417e-17	chr22	50031672	50031673	TTLL8;TTLL8	protein_coding;protein_coding	ENST00000266182.9;ENST00000433387.1	22955;25264	CGI:chr22:50031437-50031991	Island
cg25562958	0.354629	0.721086	-0.366457	4.48237e-20	3.71761e-22	chr14	101024339	101024340	AL132709.2;MIR1197;MIR323A	miRNA;miRNA;miRNA	ENST00000362112.3;ENST00000408818.2;ENST00000362199.2	-662;-1212;-1374	CGI:chr14:101065306-101066047	.
cg20852851	0.590715	0.957109	-0.366394	8.47192e-09	3.51678e-12	chr2	239247152	239247153	HDAC4;HDAC4;HDAC4;HDAC4;HDAC4;HDAC4;HDAC4	protein_coding;protein_coding;protein_coding;protein_coding;protein_coding;protein_coding;protein_coding	ENST00000345617.6;ENST00000446876.1;ENST00000463007.4;ENST00000493582.4;ENST00000535493.4;ENST00000543185.4;ENST00000544989.1	153798;62061;51488;154503;51379;153798;153860	CGI:chr2:239231780-239232096	.
cg01882058	0.470698	0.837063	-0.366365	3.04897e-15	6.27545e-18	chr16	86432278	86432279	.	.	.	.	CGI:chr16:86377548-86377851	.
cg00565679	0.461314	0.82762	-0.366306	3.14839e-12	2.87787e-15	chr12	114934088	114934089	.	.	.	.	CGI:chr12:114735809-114737017	.
cg15203028	0.526178	0.89237	-0.366192	2.62795e-12	2.44851e-15	chr11	1029188	1029189	MUC6	protein_coding	ENST00000421673.5	7519	CGI:chr11:1029083-1029390	Island
cg11726507	0.50829	0.874468	-0.366178	1.03973e-13	1.40044e-16	chr14	100689182	100689183	.	.	.	.	CGI:chr14:100708858-100709930	.
cg26247168	0.523499	0.889613	-0.366114	6.86102e-12	5.76764e-15	chr11	120124014	120124015	TRIM29;TRIM29;TRIM29;TRIM29;TRIM29;TRIM29;TRIM29;TRIM29;TRIM29	protein_coding;protein_coding;protein_coding;protein_coding;protein_coding;protein_coding;protein_coding;protein_coding;protein_coding	ENST00000341846.8;ENST00000475051.3;ENST00000524816.6;ENST00000525327.4;ENST00000528870.4;ENST00000529044.4;ENST00000530470.1;ENST00000531555.4;ENST00000533302.4	14440;14101;-742;-571;1565;4900;2344;-980;-981	CGI:chr11:120137338-120138002	.
cg21236500	0.473452	0.83945	-0.365997	1.60554e-13	2.05952e-16	chr9	136885445	136885446	MIR4479;RABL6;TRAF2;TRAF2;TRAF2	miRNA;protein_coding;protein_coding;protein_coding;protein_coding	ENST00000579420.1;ENST00000432842.5;ENST00000247668.5;ENST00000419057.4;ENST00000429509.4	-1289;58847;-1074;3532;-621	CGI:chr9:136885954-136887075	N_Shore
cg04339692	0.570984	0.936958	-0.365974	2.02083e-10	1.18296e-13	chr15	48374221	48374222	.	.	.	.	CGI:chr15:48330988-48332454	.
cg01270241	0.354877	0.720846	-0.36597	5.31315e-19	3.18971e-21	chr14	97206693	97206694	.	.	.	.	CGI:chr14:97218722-97219609	.
cg17486066	0.403498	0.769196	-0.365698	5.30348e-12	4.58949e-15	chr1	33864444	33864445	CSMD2;CSMD2;CSMD2;CSMD2;HMGB4;HMGB4;HMGB4	protein_coding;protein_coding;protein_coding;protein_coding;protein_coding;protein_coding;protein_coding	ENST00000241312.7;ENST00000373381.7;ENST00000373388.5;ENST00000619121.3;ENST00000425537.1;ENST00000519684.4;ENST00000522796.1	301399;300831;301399;301399;366;3968;3943	CGI:chr1:33633296-33633519	.
cg23545828	0.417189	0.782716	-0.365527	2.17962e-13	2.69279e-16	chr10	123695014	123695015	.	.	.	.	CGI:chr10:123666014-123667126	.
cg20384702	0.44454	0.810043	-0.365503	7.99574e-18	3.43797e-20	chr10	2317578	2317579	.	.	.	.	CGI:chr10:2315054-2315277	S_Shelf
cg11114141	0.406929	0.772412	-0.365483	1.32539e-15	3.0369e-18	chr2	205768909	205768910	NRP2;NRP2;NRP2;NRP2;NRP2;NRP2	protein_coding;protein_coding;protein_coding;protein_coding;protein_coding;protein_coding	ENST00000272849.6;ENST00000357118.7;ENST00000357785.8;ENST00000360409.6;ENST00000412873.2;ENST00000467850.1	85617;85648;85648;86408;85617;4571	CGI:chr2:205684875-205686592	.
cg09250199	0.548662	0.914017	-0.365355	5.30007e-09	2.2855e-12	chr1	91949588	91949589	BRDT;BRDT;BRDT;BRDT;BRDT;BRDT;BRDT;BRDT;BRDT;BRDT;BRDT;BRDT;BRDT;BRDT;BRDT;BRDT;BRDT;BRDT;BRDT	protein_coding;protein_coding;protein_coding;protein_coding;protein_coding;protein_coding;protein_coding;protein_coding;protein_coding;protein_coding;protein_coding;protein_coding;protein_coding;protein_coding;protein_coding;protein_coding;protein_coding;protein_coding;protein_coding	ENST00000355011.6;ENST00000362005.6;ENST00000370389.5;ENST00000394530.6;ENST00000399546.5;ENST00000423434.4;ENST00000426141.4;ENST00000427104.4;ENST00000440509.4;ENST00000448194.4;ENST00000449584.4;ENST00000450792.4;ENST00000457265.1;ENST00000461218.4;ENST00000470955.4;ENST00000476711.4;ENST00000484833.4;ENST00000548992.4;ENST00000552654.1	186;216;216;216;216;215;186;189;203;186;189;184;153;189;189;189;184;184;184	CGI:chr1:91949161-91949429	S_Shore
cg25307724	0.475263	0.840547	-0.365284	5.7976e-13	6.43257e-16	chr13	113064858	113064859	MCF2L;MCF2L;MCF2L;MCF2L;MCF2L;MCF2L;MCF2L;MCF2L;MCF2L	protein_coding;protein_coding;protein_coding;protein_coding;protein_coding;protein_coding;protein_coding;protein_coding;protein_coding	ENST00000375597.7;ENST00000375604.5;ENST00000375608.6;ENST00000397030.4;ENST00000421756.4;ENST00000423251.1;ENST00000464800.4;ENST00000475524.1;ENST00000535094.5	63103;63143;170479;96357;85545;20006;545;167;95636	CGI:chr13:113067206-113067893	N_Shelf
cg19683073	0.37976	0.744822	-0.365062	6.2019e-22	9.45824e-24	chr5	80257448	80257449	SERINC5;SERINC5;SERINC5;SERINC5	protein_coding;protein_coding;protein_coding;protein_coding	ENST00000507668.5;ENST00000509193.4;ENST00000512721.2;ENST00000512972.5	-1368;-1428;-1433;-1428	CGI:chr5:80255550-80256475	S_Shore
cg27523780	0.435381	0.800319	-0.364938	2.90078e-15	6.00398e-18	chr8	1156743	1156744	CTD-2281E23.2	processed_transcript	ENST00000520524.4	51860	CGI:chr8:1155614-1156066	S_Shore
cg15328703	0.420758	0.785684	-0.364926	7.24214e-19	4.18967e-21	chr12	125658350	125658351	TMEM132B;TMEM132B	protein_coding;protein_coding	ENST00000299308.6;ENST00000613307.1	331733;35897	CGI:chr12:125683894-125684112	.
cg08283595	0.512663	0.877572	-0.364909	1.00863e-11	8.09959e-15	chr4	1305678	1305679	MAEA;MAEA;MAEA;MAEA;MAEA;MAEA;MAEA;MAEA;MAEA;MAEA;MAEA;MAEA	protein_coding;protein_coding;protein_coding;protein_coding;protein_coding;protein_coding;protein_coding;protein_coding;protein_coding;protein_coding;protein_coding;protein_coding	ENST00000264750.9;ENST00000303400.7;ENST00000502558.4;ENST00000503653.4;ENST00000503693.1;ENST00000505177.5;ENST00000508634.1;ENST00000509254.4;ENST00000509531.4;ENST00000512308.4;ENST00000513301.4;ENST00000514708.4	15786;15826;15783;15786;15769;15790;15780;15783;15763;15786;15787;15782	CGI:chr4:1309702-1310047	.
cg06393354	0.369064	0.733749	-0.364686	2.15034e-14	3.46749e-17	chr1	248203030	248203031	OR2M3	protein_coding	ENST00000456743.2	-39	CGI:chr1:247937023-247937424	.
cg20490031	0.441727	0.806368	-0.364641	1.16884e-15	2.71193e-18	chr18	63476693	63476694	SERPINB5;SERPINB5;SERPINB5	protein_coding;protein_coding;protein_coding	ENST00000382771.7;ENST00000424602.1;ENST00000489441.4	-69;-435;-266	CGI:chr18:63422029-63423124	.
cg16063656	0.453179	0.817773	-0.364594	1.2695e-16	3.82709e-19	chr2	499710	499711	.	.	.	.	CGI:chr2:496823-497038	S_Shelf
cg02723533	0.615662	0.980248	-0.364585	7.3259e-12	6.11954e-15	chr11	69654223	69654224	CCND1;ORAOV1;ORAOV1;ORAOV1	protein_coding;protein_coding;protein_coding;protein_coding	ENST00000227507.2;ENST00000538554.5;ENST00000542515.4;ENST00000569105.4	13135;21122;4208;19073	CGI:chr11:69654042-69654384	Island
cg24240626	0.392905	0.757221	-0.364316	7.74686e-21	8.11797e-23	chr2	79159594	79159595	AC011754.1;REG3A;REG3A;REG3A;REG3A;REG3A	sense_overlapping;protein_coding;protein_coding;protein_coding;protein_coding;protein_coding	ENST00000415201.1;ENST00000305165.2;ENST00000393878.4;ENST00000409839.6;ENST00000464746.1;ENST00000490901.1	1219;156;160;160;151;160	CGI:chr2:78993066-78993466	.
cg19309079	0.403829	0.768037	-0.364207	9.71993e-20	7.29255e-22	chr2	132417738	132417739	GPR39;GPR39	protein_coding;protein_coding	ENST00000329321.3;ENST00000622084.1	1163;694	CGI:chr2:132417587-132417871	Island
cg11518938	0.326359	0.690523	-0.364164	6.6482e-17	2.18485e-19	chr1	159168427	159168428	.	.	.	.	CGI:chr1:159171412-159171928	N_Shelf
cg01065161	0.579367	0.943478	-0.364111	1.96323e-10	1.15242e-13	chr10	96370370	96370371	TLL2	protein_coding	ENST00000357947.3	143542	CGI:chr10:96384542-96384756	.
cg12305265	0.382469	0.746566	-0.364096	1.79101e-15	3.96116e-18	chr6	161644539	161644540	PARK2;PARK2;PARK2;PARK2;PARK2;PARK2;PARK2	protein_coding;protein_coding;protein_coding;protein_coding;protein_coding;protein_coding;protein_coding	ENST00000338468.6;ENST00000366892.4;ENST00000366894.4;ENST00000366896.4;ENST00000366897.4;ENST00000366898.4;ENST00000479615.4	1083130;1083226;1083130;1083233;1083233;1083233;1083130	CGI:chr6:161645885-161646657	N_Shore
cg25388528	0.398912	0.76298	-0.364068	6.41473e-19	3.76073e-21	chr21	30615659	30615660	KRTAP20-1	protein_coding	ENST00000334664.3	-767	CGI:chr21:31251828-31252066	.
cg24875595	0.38062	0.744616	-0.363996	2.07994e-14	3.36848e-17	chr2	79136635	79136636	REG1P;REG1P;REG1P	transcribed_unprocessed_pseudogene;transcribed_unprocessed_pseudogene;transcribed_unprocessed_pseudogene	ENST00000377435.7;ENST00000444841.4;ENST00000447469.4	1793;1793;1396	CGI:chr2:78993066-78993466	.
cg15549700	0.550419	0.914355	-0.363936	2.39893e-09	1.10908e-12	chr1	4662630	4662631	AJAP1;AJAP1	protein_coding;protein_coding	ENST00000378190.6;ENST00000378191.4	7897;7584	CGI:chr1:4666516-4666807	N_Shelf
cg18627442	0.571203	0.934885	-0.363681	1.03627e-12	1.07243e-15	chr12	128415372	128415373	TMEM132C	protein_coding	ENST00000435159.2	147968	CGI:chr12:128415268-128415520	Island
cg08513547	0.383541	0.747217	-0.363676	5.67898e-22	8.823e-24	chr5	150943996	150943997	ZNF300P1;ZNF300P1	transcribed_unprocessed_pseudogene;transcribed_unprocessed_pseudogene	ENST00000356555.6;ENST00000520773.4	2294;1064	CGI:chr5:150946342-150946632	N_Shelf
cg17182270	0.482541	0.846187	-0.363647	2.53664e-13	3.07631e-16	chr17	17445713	17445714	.	.	.	.	CGI:chr17:17476861-17477077	.
cg02192678	0.358487	0.722124	-0.363637	9.98835e-15	1.76696e-17	chr8	1547019	1547020	DLGAP2;DLGAP2	protein_coding;protein_coding	ENST00000421627.5;ENST00000612087.1	45652;45652	CGI:chr8:1546939-1547167	Island
cg26938676	0.429678	0.793208	-0.36353	3.3992e-12	3.07699e-15	chr14	72737418	72737419	DPF3;DPF3;DPF3;DPF3;DPF3;DPF3;DPF3;DPF3	protein_coding;protein_coding;protein_coding;protein_coding;protein_coding;protein_coding;protein_coding;protein_coding	ENST00000366353.7;ENST00000381216.7;ENST00000541685.4;ENST00000546183.1;ENST00000553608.1;ENST00000556509.4;ENST00000610283.3;ENST00000614862.3	155232;156684;156699;156684;5294;156671;155232;156699	CGI:chr14:72892081-72894226	.
cg21129006	0.342018	0.705409	-0.363391	9.08904e-19	5.11853e-21	chr12	3913912	3913913	.	.	.	.	CGI:chr12:3873080-3873542	.
cg16774755	0.419351	0.78262	-0.363269	6.0252e-18	2.68127e-20	chr16	86388340	86388341	.	.	.	.	CGI:chr16:86377548-86377851	.
cg06885179	0.365886	0.729112	-0.363227	8.78591e-16	2.11672e-18	chr5	8842632	8842633	RP11-143A12.3;RP11-143A12.3	lincRNA;lincRNA	ENST00000510067.1;ENST00000510229.1	2866;2899	CGI:chr5:8457319-8458160	.
cg24580655	0.425724	0.788919	-0.363195	2.51745e-15	5.30948e-18	chr1	159175848	159175849	CADM3;CADM3;CADM3	protein_coding;protein_coding;protein_coding	ENST00000368124.7;ENST00000368125.7;ENST00000416746.1	4238;4238;4088	CGI:chr1:159171412-159171928	S_Shelf
cg02456804	0.429444	0.792564	-0.36312	6.35937e-15	1.19121e-17	chr1	166070621	166070622	FAM78B;FAM78B;FAM78B;FAM78B;FAM78B	protein_coding;protein_coding;protein_coding;protein_coding;protein_coding	ENST00000338353.3;ENST00000354422.3;ENST00000435676.2;ENST00000441649.1;ENST00000456900.1	96349;96095;95605;95614;95761	CGI:chr1:166165021-166167211	.
cg22650099	0.437088	0.800203	-0.363115	3.47185e-14	5.32026e-17	chr4	17142873	17142874	.	.	.	.	CGI:chr4:17511686-17512358	.
cg01233518	0.583613	0.946709	-0.363096	8.35613e-11	5.36337e-14	*	-1	-1	.	.	.	.	.	.
cg27505627	0.565195	0.928053	-0.362859	1.37657e-13	1.79675e-16	chr22	38110582	38110583	BAIAP2L2;BAIAP2L2	protein_coding;protein_coding	ENST00000332536.8;ENST00000381669.6	64;89	CGI:chr22:38120728-38121023	.
cg13909405	0.38476	0.747582	-0.362822	4.10469e-22	6.7448e-24	chr2	37676338	37676339	CDC42EP3	protein_coding	ENST00000453555.1	62131	CGI:chr2:37670999-37672687	S_Shelf
cg07216610	0.506533	0.869239	-0.362706	1.74826e-09	8.33639e-13	chr2	235968848	235968849	AGAP1;AGAP1;AGAP1;AGAP1;AGAP1;AGAP1;AGAP1	protein_coding;protein_coding;protein_coding;protein_coding;protein_coding;protein_coding;protein_coding	ENST00000304032.11;ENST00000336665.8;ENST00000409538.4;ENST00000418654.1;ENST00000428334.5;ENST00000448025.4;ENST00000614409.3	474740;474740;299243;60005;259669;85452;259670	CGI:chr2:235959008-235959262	.
cg25316305	0.49131	0.853992	-0.362682	2.0464e-15	4.4418e-18	chr12	4251969	4251970	CCND2-AS1	antisense	ENST00000539135.1	24216	CGI:chr12:4243756-4244063	.
cg17735539	0.202985	0.565481	-0.362496	4.76753e-28	8.78229e-29	chr10	1402362	1402363	ADARB2	protein_coding	ENST00000381312.4	335115	CGI:chr10:1397426-1397819	.
cg16596317	0.345107	0.707582	-0.362475	3.09016e-17	1.11789e-19	chr1	85289665	85289666	RP11-131L23.1;RP11-131L23.1	antisense;antisense	ENST00000426125.1;ENST00000427819.4	11992;12949	CGI:chr1:85276182-85276852	.
cg25282652	0.436	0.798445	-0.362445	2.45549e-14	3.90646e-17	chr12	127880194	127880195	FLJ37505;FLJ37505	lincRNA;lincRNA	ENST00000536342.1;ENST00000614177.1	-1424;-1451	CGI:chr12:127761047-127761291	.
cg26378179	0.363105	0.725543	-0.362438	2.11872e-15	4.57466e-18	chr14	87011005	87011006	.	.	.	.	CGI:chr14:87992552-87993345	.
cg20598190	0.304145	0.66627	-0.362125	1.54649e-24	6.11606e-26	chr2	239927507	239927508	NDUFA10	protein_coding	ENST00000419408.4	84154	CGI:chr2:239928861-239929173	N_Shore
cg10765397	0.381491	0.743528	-0.362037	9.43834e-23	1.94892e-24	chr8	1335505	1335506	.	.	.	.	CGI:chr8:1350172-1352315	.
cg16233797	0.338282	0.700131	-0.361849	4.63363e-16	1.20087e-18	chr2	19801729	19801730	.	.	.	.	CGI:chr2:19868667-19869146	.
cg06457736	0.363335	0.725051	-0.361716	3.82043e-11	2.66206e-14	chr3	11136997	11136998	HRH1	protein_coding	ENST00000438284.2	-97	CGI:chr3:11154215-11154866	.
cg08496086	0.513497	0.875097	-0.3616	4.95484e-13	5.59959e-16	chr5	2176028	2176029	.	.	.	.	CGI:chr5:2180137-2180353	.
cg03784113	0.316534	0.6781	-0.361566	2.29281e-19	1.54324e-21	chr13	111948178	111948179	.	.	.	.	CGI:chr13:111956344-111957119	.
cg14528916	0.449228	0.810773	-0.361545	2.10618e-13	2.61266e-16	chr1	181747127	181747128	CACNA1E;CACNA1E;CACNA1E;CACNA1E;CACNA1E;CACNA1E;CACNA1E;CACNA1E	protein_coding;protein_coding;protein_coding;protein_coding;protein_coding;protein_coding;protein_coding;protein_coding	ENST00000357570.8;ENST00000358338.7;ENST00000360108.6;ENST00000367567.7;ENST00000367570.4;ENST00000367573.5;ENST00000621551.2;ENST00000621791.3	263381;263381;263388;263381;263546;263381;263381;263546	CGI:chr1:181798357-181798757	.
cg16233450	0.396733	0.758198	-0.361466	3.9796e-14	6.005e-17	chr1	248574955	248574956	OR2T34	protein_coding	ENST00000328782.3	-197	CGI:chr1:248691729-248692169	.
cg03564727	0.436301	0.797712	-0.36141	3.54171e-11	2.48691e-14	chr19	49073949	49073950	KCNA7	protein_coding	ENST00000221444.1	-1007	CGI:chr19:49071872-49072959	S_Shore
cg13303313	0.32524	0.686509	-0.361269	1.22165e-12	1.24133e-15	chr5	140718645	140718646	VTRNA1-2	misc_RNA	ENST00000365241.1	-281	CGI:chr5:140691219-140691743	.
cg13804738	0.466326	0.827527	-0.361201	1.18455e-15	2.74474e-18	chr10	131201970	131201971	TCERG1L;TCERG1L	protein_coding;protein_coding	ENST00000368642.4;ENST00000483040.1	109752;58367	CGI:chr10:131260075-131260346	.
cg02869444	0.427504	0.788677	-0.361173	3.5839e-14	5.46803e-17	chr10	109239002	109239003	RNU6-839P	snRNA	ENST00000363347.1	-638	CGI:chr10:109456846-109457325	.
cg12550241	0.357268	0.718411	-0.361143	9.24497e-21	9.40622e-23	chr1	248695740	248695741	XX-CR54.1	lincRNA	ENST00000437830.3	-1267	CGI:chr1:248691729-248692169	S_Shelf
cg16928869	0.372715	0.733827	-0.361112	4.59917e-27	4.8051e-28	chr20	61822710	61822711	CDH4;CDH4;CDH4	protein_coding;protein_coding;protein_coding	ENST00000543233.2;ENST00000611855.3;ENST00000614565.3	222948;252574;570283	CGI:chr20:61773042-61773372	.
cg22969666	0.448728	0.809807	-0.361079	4.85336e-18	2.22631e-20	chr14	97221677	97221678	.	.	.	.	CGI:chr14:97218722-97219609	S_Shelf
cg10855978	0.313259	0.674277	-0.361018	3.5506e-18	1.69307e-20	chr8	23922728	23922729	.	.	.	.	CGI:chr8:23726473-23727248	.
cg24311564	0.58594	0.946938	-0.360998	5.92883e-11	3.94767e-14	chr7	154750603	154750604	DPP6;DPP6;DPP6;DPP6	protein_coding;protein_coding;protein_coding;protein_coding	ENST00000332007.6;ENST00000377770.6;ENST00000404039.4;ENST00000427557.1	445492;697922;863505;445160	CGI:chr7:154750349-154750638	Island
cg08443563	0.170507	0.531442	-0.360935	1.61624e-32	3.77123e-32	chr2	111699234	111699235	.	.	.	.	CGI:chr2:111883760-111884329	.
cg12280471	0.286952	0.647817	-0.360865	1.08733e-23	3.10666e-25	chr1	247424492	247424493	NLRP3;NLRP3;NLRP3;NLRP3;NLRP3;NLRP3;NLRP3	protein_coding;protein_coding;protein_coding;protein_coding;protein_coding;protein_coding;protein_coding	ENST00000336119.6;ENST00000348069.5;ENST00000366496.5;ENST00000366497.5;ENST00000391827.2;ENST00000391828.6;ENST00000474792.1	6442;6442;6439;8335;5696;8335;5871	CGI:chr1:247406013-247406500	.
cg01900836	0.485768	0.846577	-0.360809	2.30214e-14	3.6809e-17	chr7	38703630	38703631	.	.	.	.	CGI:chr7:38630839-38631561	.
cg06012483	0.314159	0.674936	-0.360777	8.1005e-23	1.72351e-24	chr16	86355247	86355248	.	.	.	.	CGI:chr16:86377548-86377851	.
cg07513950	0.509371	0.869894	-0.360524	8.2167e-14	1.13111e-16	chr10	2328838	2328839	.	.	.	.	CGI:chr10:2315054-2315277	.
cg18350545	0.448471	0.808986	-0.360515	3.80297e-15	7.61029e-18	chr1	248121961	248121962	OR2M1P	unprocessed_pseudogene	ENST00000318104.2	28	CGI:chr1:247937023-247937424	.
cg13713739	0.563255	0.923714	-0.360459	4.67861e-08	1.71396e-11	chr9	129721098	129721099	PRRX2	protein_coding	ENST00000372469.5	55456	CGI:chr9:129720119-129720359	S_Shore
cg05533037	0.442528	0.802981	-0.360453	1.33792e-14	2.28537e-17	chr21	30829692	30829693	KRTAP7-1	protein_coding	ENST00000621162.1	68	CGI:chr21:31251828-31252066	.
cg00440032	0.523801	0.883946	-0.360145	3.51802e-13	4.12222e-16	chr12	126773133	126773134	LINC00944;LINC00944;LINC00944	lincRNA;lincRNA;lincRNA	ENST00000536517.1;ENST00000540684.4;ENST00000542248.4	-870;-721;-776	CGI:chr12:126727733-126727983	.
cg04482075	0.619182	0.979206	-0.360023	3.25995e-12	2.96629e-15	chr16	1941307	1941308	MSRB1;MSRB1;MSRB1;MSRB1;MSRB1;MSRB1	protein_coding;protein_coding;protein_coding;protein_coding;protein_coding;protein_coding	ENST00000361871.6;ENST00000399753.2;ENST00000473663.1;ENST00000489198.1;ENST00000564908.1;ENST00000622125.3	2020;1889;1817;633;1893;1987	CGI:chr16:1942667-1943645	N_Shore
cg07775417	0.308319	0.668336	-0.360017	8.25692e-24	2.48062e-25	chr4	83548410	83548411	AGPAT9;AGPAT9;AGPAT9	protein_coding;protein_coding;protein_coding	ENST00000264409.4;ENST00000395226.5;ENST00000611707.3	11998;12301;12495	CGI:chr4:83535962-83536707	.
cg01947943	0.440131	0.800115	-0.359984	1.43168e-11	1.10652e-14	chr6	29045082	29045083	OR2W1;XXbac-BPG258E24.10;XXbac-BPG258E24.10	protein_coding;antisense;antisense	ENST00000377175.1;ENST00000623334.2;ENST00000623946.1	159;9060;8858	CGI:chr6:29016641-29016878	.
cg26753302	0.362578	0.722557	-0.359979	7.27079e-20	5.68665e-22	chr18	63476760	63476761	SERPINB5;SERPINB5;SERPINB5	protein_coding;protein_coding;protein_coding	ENST00000382771.7;ENST00000424602.1;ENST00000489441.4	-2;-368;-199	CGI:chr18:63422029-63423124	.
cg21594383	0.390404	0.750305	-0.3599	3.84931e-19	2.43627e-21	chr8	761581	761582	ERICH1-AS1;ERICH1-AS1	antisense;antisense	ENST00000522092.4;ENST00000577187.4	23929;23838	CGI:chr8:747858-748262	.
cg03214622	0.489789	0.849669	-0.35988	7.42082e-16	1.82458e-18	chr17	79119551	79119552	RBFOX3;RBFOX3;RBFOX3;RBFOX3;RBFOX3;RBFOX3	protein_coding;protein_coding;protein_coding;protein_coding;protein_coding;protein_coding	ENST00000580155.4;ENST00000580508.1;ENST00000582043.4;ENST00000582139.1;ENST00000583458.4;ENST00000584778.4	396598;63922;116255;89006;363048;389318	CGI:chr17:79131323-79131524	.
cg06222885	0.458456	0.818157	-0.3597	1.29075e-15	2.96529e-18	chr4	181968054	181968055	AC108142.1	antisense	ENST00000509012.4	176142	CGI:chr4:182141125-182141328	.
cg23521666	0.521895	0.881556	-0.35966	1.26626e-10	7.79511e-14	chr12	132352339	132352340	.	.	.	.	CGI:chr12:132358785-132359566	.
cg02555944	0.314083	0.673474	-0.359392	3.65126e-26	2.5817e-27	chr8	142562746	142562747	.	.	.	.	CGI:chr8:142563711-142564312	N_Shore
cg03175417	0.439134	0.798467	-0.359333	2.55129e-18	1.27747e-20	chr22	20062775	20062776	AC006547.13;TANGO2;TANGO2;TANGO2;TANGO2;TANGO2;TANGO2;TANGO2;TANGO2;TANGO2;TANGO2;TANGO2;TANGO2;TANGO2;TANGO2;TANGO2;TANGO2;TANGO2	antisense;protein_coding;protein_coding;protein_coding;protein_coding;protein_coding;protein_coding;protein_coding;protein_coding;protein_coding;protein_coding;protein_coding;protein_coding;protein_coding;protein_coding;protein_coding;protein_coding;protein_coding	ENST00000628442.1;ENST00000327374.7;ENST00000398042.5;ENST00000399807.6;ENST00000401833.4;ENST00000401886.4;ENST00000420290.5;ENST00000430807.4;ENST00000432883.4;ENST00000434168.4;ENST00000434570.5;ENST00000444651.4;ENST00000447208.5;ENST00000450019.4;ENST00000456048.4;ENST00000476940.1;ENST00000485715.2;ENST00000490583.4	2477;41666;41702;41685;41635;45760;41705;41647;41705;41619;41705;26015;41705;41667;41705;-799;26014;9339	CGI:chr22:20079883-20080679	.
cg00134787	0.451942	0.811228	-0.359286	9.704e-15	1.72839e-17	chr17	10516182	10516183	MYH1;MYHAS;RP11-799N11.1;RP11-799N11.1	protein_coding;antisense;antisense;antisense	ENST00000226207.5;ENST00000587182.2;ENST00000399342.5;ENST00000581304.1	2362;133037;133049;133025	CGI:chr17:10638164-10638477	.
cg08912860	0.434383	0.793667	-0.359284	9.69788e-14	1.31568e-16	chr12	132287196	132287197	GALNT9;GALNT9;GALNT9	protein_coding;protein_coding;protein_coding	ENST00000328957.11;ENST00000424720.5;ENST00000540493.1	42008;42154;-724	CGI:chr12:132286000-132286370	S_Shore
cg10673328	0.348402	0.707625	-0.359222	2.31931e-19	1.55808e-21	chr8	7813975	7813976	DEFB107A	protein_coding	ENST00000335021.2	1742	CGI:chr8:7792089-7792343	.
cg12589098	0.461216	0.820385	-0.359169	4.49775e-16	1.16825e-18	chr10	129061941	129061942	.	.	.	.	CGI:chr10:128710103-128710394	.
cg26068160	0.526165	0.885242	-0.359077	3.68315e-11	2.57563e-14	chr13	112241232	112241233	.	.	.	.	CGI:chr13:112241113-112241394	Island
cg13884879	0.438999	0.798009	-0.35901	7.78243e-19	4.45438e-21	chr2	9400630	9400631	ASAP2;ASAP2;ASAP2;ASAP2	protein_coding;protein_coding;protein_coding;protein_coding	ENST00000281419.6;ENST00000315273.4;ENST00000484590.1;ENST00000491413.1	193864;193864;1788;12335	CGI:chr2:9393443-9393678	.
cg16812893	0.423496	0.782449	-0.358953	1.75599e-17	6.85131e-20	chr21	30440757	30440758	KRTAP15-1	protein_coding	ENST00000334067.4	481	CGI:chr21:29939068-29939788	.
cg02140020	0.523743	0.882512	-0.358769	2.2681e-12	2.15015e-15	chr12	2504748	2504749	CACNA1C;CACNA1C;CACNA1C;CACNA1C;CACNA1C;CACNA1C;CACNA1C;CACNA1C;CACNA1C;CACNA1C;CACNA1C;CACNA1C;CACNA1C;CACNA1C;CACNA1C;CACNA1C;CACNA1C;CACNA1C;CACNA1C;CACNA1C;CACNA1C;CACNA1C;CACNA1C;CACNA1C;CACNA1C;CACNA1C;CACNA1C;CACNA1C;CACNA1C	protein_coding;protein_coding;protein_coding;protein_coding;protein_coding;protein_coding;protein_coding;protein_coding;protein_coding;protein_coding;protein_coding;protein_coding;protein_coding;protein_coding;protein_coding;protein_coding;protein_coding;protein_coding;protein_coding;protein_coding;protein_coding;protein_coding;protein_coding;protein_coding;protein_coding;protein_coding;protein_c…	ENST00000327702.10;ENST00000335762.8;ENST00000344100.6;ENST00000347598.7;ENST00000399591.4;ENST00000399595.4;ENST00000399597.4;ENST00000399601.4;ENST00000399603.4;ENST00000399606.4;ENST00000399617.4;ENST00000399621.4;ENST00000399629.4;ENST00000399634.4;ENST00000399637.4;ENST00000399638.4;ENST00000399641.4;ENST00000399644.4;ENST00000399649.4;ENST00000399655.4;ENST00000402845.6;ENST00000406454.6;EN…	451184;451449;451184;451184;451184;451184;451184;451184;451184;451184;451184;451184;451184;451184;451184;451184;451184;451184;451184;451449;451184;451184;451209;311;55771;55771;55771;55771;55771	CGI:chr12:2679448-2679713	.
cg02710090	0.365053	0.723747	-0.358693	1.59857e-17	6.30067e-20	chr1	207051783	207051784	C4BPB;PFKFB2;PFKFB2;PFKFB2;PFKFB2;PFKFB2;PFKFB2;YOD1;YOD1	protein_coding;protein_coding;protein_coding;protein_coding;protein_coding;protein_coding;protein_coding;protein_coding;protein_coding	ENST00000451804.5;ENST00000367080.6;ENST00000411990.5;ENST00000464777.4;ENST00000468857.1;ENST00000545806.4;ENST00000618513.3;ENST00000315927.7;ENST00000367084.1	44937;-1478;17366;-1493;-1501;17416;17366;-705;1198	CGI:chr1:207050744-207051105	S_Shore
cg03019112	0.429984	0.788538	-0.358554	1.40502e-13	1.82979e-16	chr14	101052183	101052184	MIR487A	miRNA	ENST00000384827.2	-242	CGI:chr14:101065306-101066047	.
cg08629856	0.470179	0.82868	-0.358501	1.24421e-16	3.75732e-19	chr10	131114890	131114891	TCERG1L;TCERG1L	protein_coding;protein_coding	ENST00000368642.4;ENST00000483040.1	196832;145447	CGI:chr10:131095165-131095425	.
cg03914397	0.45273	0.811228	-0.358498	9.42332e-14	1.28208e-16	chr5	152404880	152404881	NMUR2;NMUR2	protein_coding;protein_coding	ENST00000255262.3;ENST00000518933.1	400;28489	CGI:chr5:151924665-151925263	.
cg10592734	0.445353	0.803837	-0.358484	1.85831e-13	2.3455e-16	chr7	139870797	139870798	TBXAS1;TBXAS1;TBXAS1;TBXAS1;TBXAS1;TBXAS1;TBXAS1;TBXAS1;TBXAS1;TBXAS1;TBXAS1;TBXAS1;TBXAS1;TBXAS1;TBXAS1	protein_coding;protein_coding;protein_coding;protein_coding;protein_coding;protein_coding;protein_coding;protein_coding;protein_coding;protein_coding;protein_coding;protein_coding;protein_coding;protein_coding;protein_coding	ENST00000263552.9;ENST00000336425.8;ENST00000411653.4;ENST00000414041.1;ENST00000414508.5;ENST00000416849.5;ENST00000422328.4;ENST00000425687.4;ENST00000438104.4;ENST00000448866.4;ENST00000455353.4;ENST00000458722.4;ENST00000462275.4;ENST00000476637.4;ENST00000492560.5	92548;92396;41532;41494;41643;92548;41549;92548;92458;41572;41542;41542;41523;41525;41547	CGI:chr7:139950675-139950880	.
cg08101739	0.465269	0.823636	-0.358366	2.27718e-13	2.79904e-16	chr1	152842682	152842683	LCE6A	protein_coding	ENST00000431011.2	-187	CGI:chr1:152515581-152515794	.
cg23685969	0.327819	0.686139	-0.358321	3.10256e-21	3.81696e-23	chr10	72217063	72217064	ANAPC16;ANAPC16;ANAPC16;ANAPC16;ASCC1;ASCC1;ASCC1;ASCC1;ASCC1;ASCC1;ASCC1;ASCC1;ASCC1;ASCC1;ASCC1;ASCC1	protein_coding;protein_coding;protein_coding;protein_coding;protein_coding;protein_coding;protein_coding;protein_coding;protein_coding;protein_coding;protein_coding;protein_coding;protein_coding;protein_coding;protein_coding;protein_coding	ENST00000299381.4;ENST00000478193.4;ENST00000615507.3;ENST00000621663.3;ENST00000317126.7;ENST00000317168.9;ENST00000342444.7;ENST00000394915.6;ENST00000394919.4;ENST00000492502.2;ENST00000524829.4;ENST00000526751.4;ENST00000527593.4;ENST00000530461.4;ENST00000532011.4;ENST00000533958.1	1014;1033;1062;1062;72;-774;-787;-953;-953;-805;-751;-1089;-786;-776;-780;-787	CGI:chr10:72215913-72216357	S_Shore
cg21449256	0.598288	0.956507	-0.358219	4.59523e-09	2.00403e-12	chr8	1387978	1387979	.	.	.	.	CGI:chr8:1393054-1394000	.
cg01252713	0.3958	0.753873	-0.358073	1.27773e-16	3.84693e-19	chr2	234640945	234640946	.	.	.	.	CGI:chr2:234495858-234497897	.
cg26328589	0.506961	0.864965	-0.358004	1.25554e-11	9.82535e-15	chr17	28709550	28709551	PROCA1;PROCA1;PROCA1;PROCA1;PROCA1;PROCA1;PROCA1	protein_coding;protein_coding;protein_coding;protein_coding;protein_coding;protein_coding;protein_coding	ENST00000301039.5;ENST00000422880.5;ENST00000439862.6;ENST00000473751.1;ENST00000578097.1;ENST00000579650.4;ENST00000581289.1	2305;1537;2111;2133;1542;1750;2198	CGI:chr17:28711066-28711901	N_Shore
cg09043518	0.381109	0.739047	-0.357939	8.25323e-16	2.00182e-18	chr17	82332230	82332231	SECTM1;SECTM1;SECTM1;SECTM1;SECTM1;SECTM1;SECTM1	protein_coding;protein_coding;protein_coding;protein_coding;protein_coding;protein_coding;protein_coding	ENST00000269389.6;ENST00000580437.4;ENST00000581691.4;ENST00000581864.4;ENST00000582290.4;ENST00000582563.4;ENST00000583093.4	1769;1533;1845;1519;1537;1540;1534	CGI:chr17:82333144-82334518	N_Shore
cg24599709	0.462739	0.820626	-0.357888	2.69571e-17	9.97883e-20	chr2	26355640	26355641	EPT1;EPT1;EPT1;EPT1	protein_coding;protein_coding;protein_coding;protein_coding	ENST00000260585.10;ENST00000442141.4;ENST00000447170.1;ENST00000613142.3	9525;47092;9490;9553	CGI:chr2:26345540-26346498	.
cg17680767	0.378054	0.735923	-0.357869	6.72645e-18	2.95575e-20	chr5	74327383	74327384	CTD-2275D24.1;LINC01333	lincRNA;lincRNA	ENST00000512458.1;ENST00000508083.1	5751;4896	CGI:chr5:74639900-74641726	.
cg16104384	0.580806	0.938546	-0.35774	3.29053e-10	1.83462e-13	chr22	49542040	49542041	C22orf34;C22orf34	lincRNA;lincRNA	ENST00000414287.4;ENST00000416411.1	115465;115418	CGI:chr22:49541012-49541731	S_Shore
cg05349159	0.424957	0.782694	-0.357738	1.7699e-19	1.24266e-21	chr1	247532026	247532027	GCSAML;GCSAML;GCSAML;GCSAML;GCSAML;GCSAML;GCSAML;GCSAML;GCSAML;GCSAML;OR2C3;OR2C3	protein_coding;protein_coding;protein_coding;protein_coding;protein_coding;protein_coding;protein_coding;protein_coding;protein_coding;protein_coding;protein_coding;protein_coding	ENST00000366489.4;ENST00000366491.5;ENST00000463359.4;ENST00000526896.4;ENST00000527084.4;ENST00000527541.4;ENST00000529512.4;ENST00000531662.1;ENST00000536561.4;ENST00000623578.2;ENST00000366487.3;ENST00000617752.1	24905;24910;13593;24901;24967;24952;13573;13551;24967;13573;1814;588	CGI:chr1:247530733-247531199	S_Shore
cg12939270	0.461022	0.818728	-0.357706	4.31297e-13	4.95093e-16	chr6	28526668	28526669	GPX5;GPX5;GPX6	protein_coding;protein_coding;protein_coding	ENST00000412168.5;ENST00000469384.1;ENST00000483058.1	742;655;1548	CGI:chr6:28587086-28587347	.
cg23460250	0.45548	0.813108	-0.357628	1.73192e-08	6.81552e-12	chr7	73809522	73809523	CLDN4	protein_coding	ENST00000466411.1	9979	CGI:chr7:73831104-73831715	.
cg08373573	0.600587	0.958042	-0.357455	4.75863e-10	2.56135e-13	chr11	1028291	1028292	MUC6	protein_coding	ENST00000421673.5	8416	CGI:chr11:1029083-1029390	N_Shore
cg10333400	0.434331	0.791682	-0.357351	6.38075e-20	5.06984e-22	chr16	832746	832747	.	.	.	.	CGI:chr16:825105-825589	.
cg19371121	0.395974	0.753281	-0.357307	1.44475e-14	2.44577e-17	chr1	175081343	175081344	TNN;TNN;TNN	protein_coding;protein_coding;protein_coding	ENST00000239462.7;ENST00000621086.1;ENST00000622870.3	13484;3923;3953	CGI:chr1:175079414-175079738	S_Shore
cg24968629	0.501101	0.858354	-0.357253	9.44115e-09	3.8857e-12	chr22	46374747	46374748	CELSR1;CELSR1	protein_coding;protein_coding	ENST00000262738.6;ENST00000468025.1	162424;2878	CGI:chr22:46374536-46374974	Island
cg14541582	0.475872	0.833123	-0.357252	2.52758e-14	4.00477e-17	chr5	601360	601361	.	.	.	.	CGI:chr5:602009-602438	N_Shore
cg04727521	0.538041	0.895162	-0.357121	1.65705e-10	9.91313e-14	chr16	1104951	1104952	LA16c-349E11.1	unprocessed_pseudogene	ENST00000564813.2	511	CGI:chr16:1104940-1105319	Island
cg23205818	0.596857	0.953913	-0.357056	3.72174e-10	2.05281e-13	chr14	72562424	72562425	RGS6;RGS6;RGS6;RGS6;RGS6;RGS6;RGS6;RGS6;RGS6;RGS6;RP3-514A23.2	protein_coding;protein_coding;protein_coding;protein_coding;protein_coding;protein_coding;protein_coding;protein_coding;protein_coding;protein_coding;lincRNA	ENST00000343854.9;ENST00000402788.5;ENST00000553525.4;ENST00000553530.4;ENST00000554300.1;ENST00000554474.4;ENST00000554782.1;ENST00000555571.4;ENST00000556437.4;ENST00000622468.3;ENST00000555303.1	210330;210331;629984;629307;22361;629278;102754;629806;629191;210330;32702	CGI:chr14:72892081-72894226	.
cg11802013	0.455436	0.812475	-0.357038	1.55205e-20	1.4842e-22	chr11	69654407	69654408	CCND1;ORAOV1;ORAOV1;ORAOV1	protein_coding;protein_coding;protein_coding;protein_coding	ENST00000227507.2;ENST00000538554.5;ENST00000542515.4;ENST00000569105.4	13319;20938;4024;18889	CGI:chr11:69654042-69654384	S_Shore
cg04242070	0.313149	0.67017	-0.357021	1.61461e-23	4.26501e-25	chr5	1748986	1748987	.	.	.	.	CGI:chr5:1746254-1746935	S_Shelf
cg17372758	0.270839	0.627788	-0.356949	1.02297e-16	3.17411e-19	chr10	72217040	72217041	ANAPC16;ANAPC16;ANAPC16;ANAPC16;ASCC1;ASCC1;ASCC1;ASCC1;ASCC1;ASCC1;ASCC1;ASCC1;ASCC1;ASCC1;ASCC1;ASCC1	protein_coding;protein_coding;protein_coding;protein_coding;protein_coding;protein_coding;protein_coding;protein_coding;protein_coding;protein_coding;protein_coding;protein_coding;protein_coding;protein_coding;protein_coding;protein_coding	ENST00000299381.4;ENST00000478193.4;ENST00000615507.3;ENST00000621663.3;ENST00000317126.7;ENST00000317168.9;ENST00000342444.7;ENST00000394915.6;ENST00000394919.4;ENST00000492502.2;ENST00000524829.4;ENST00000526751.4;ENST00000527593.4;ENST00000530461.4;ENST00000532011.4;ENST00000533958.1	991;1010;1039;1039;95;-751;-764;-930;-930;-782;-728;-1066;-763;-753;-757;-764	CGI:chr10:72215913-72216357	S_Shore
cg12485926	0.487587	0.844509	-0.356922	1.90075e-13	2.39088e-16	chr11	58402830	58402831	OR5B3	protein_coding	ENST00000309403.2	580	CGI:chr11:58578200-58579848	.
cg24622143	0.489928	0.846814	-0.356886	9.79078e-15	1.73836e-17	chr13	114015305	114015306	RASA3	protein_coding	ENST00000334062.7	117307	CGI:chr13:114015216-114015572	Island
cg12255501	0.417492	0.774319	-0.356827	1.3625e-14	2.32169e-17	chr8	2564456	2564457	.	.	.	.	CGI:chr8:2561843-2562368	S_Shelf
cg24432768	0.34145	0.698211	-0.356761	7.67794e-20	5.95189e-22	chr1	158180184	158180185	CD1D	protein_coding	ENST00000368171.3	236	CGI:chr1:158180830-158181713	N_Shore
cg03276000	0.429955	0.786513	-0.356559	6.60125e-14	9.31816e-17	chr7	154390890	154390891	DPP6;DPP6;DPP6;DPP6;DPP6;DPP6;DPP6;DPP6	protein_coding;protein_coding;protein_coding;protein_coding;protein_coding;protein_coding;protein_coding;protein_coding	ENST00000332007.6;ENST00000377770.6;ENST00000404039.4;ENST00000406326.4;ENST00000427557.1;ENST00000462622.4;ENST00000496611.1;ENST00000619756.3	85779;338209;503792;338471;85447;85779;85677;85627	CGI:chr7:154304879-154305196	.
cg12769118	0.244245	0.600742	-0.356497	4.04966e-22	6.68576e-24	chr1	247549075	247549076	GCSAML;GCSAML;GCSAML;GCSAML;GCSAML;GCSAML;GCSAML;GCSAML;GCSAML;GCSAML;GCSAML	protein_coding;protein_coding;protein_coding;protein_coding;protein_coding;protein_coding;protein_coding;protein_coding;protein_coding;protein_coding;protein_coding	ENST00000366488.4;ENST00000366489.4;ENST00000366491.5;ENST00000463359.4;ENST00000526896.4;ENST00000527084.4;ENST00000527541.4;ENST00000529512.4;ENST00000531662.1;ENST00000536561.4;ENST00000623578.2	-14;41954;41959;30642;41950;42016;42001;30622;30600;42016;30622	CGI:chr1:247530733-247531199	.
cg19241878	0.335115	0.691557	-0.356442	4.10423e-18	1.92687e-20	chr17	50768828	50768829	LINC00483;LINC00483;LINC00483;LINC00483;LINC00483	processed_transcript;processed_transcript;processed_transcript;processed_transcript;processed_transcript	ENST00000300458.1;ENST00000419688.1;ENST00000450727.4;ENST00000502517.4;ENST00000576150.1	-1309;-1310;-1311;-1270;-1309	CGI:chr17:50781274-50781577	.
cg15985344	0.509494	0.86584	-0.356347	6.73821e-13	7.34353e-16	chr4	1305367	1305368	MAEA;MAEA;MAEA;MAEA;MAEA;MAEA;MAEA;MAEA;MAEA;MAEA;MAEA;MAEA	protein_coding;protein_coding;protein_coding;protein_coding;protein_coding;protein_coding;protein_coding;protein_coding;protein_coding;protein_coding;protein_coding;protein_coding	ENST00000264750.9;ENST00000303400.7;ENST00000502558.4;ENST00000503653.4;ENST00000503693.1;ENST00000505177.5;ENST00000508634.1;ENST00000509254.4;ENST00000509531.4;ENST00000512308.4;ENST00000513301.4;ENST00000514708.4	15475;15515;15472;15475;15458;15479;15469;15472;15452;15475;15476;15471	CGI:chr4:1309702-1310047	.
cg06710785	0.446109	0.802392	-0.356283	1.41536e-20	1.37033e-22	chr10	81924073	81924074	NRG3;NRG3;NRG3;NRG3;NRG3;NRG3;NRG3	protein_coding;protein_coding;protein_coding;protein_coding;protein_coding;protein_coding;protein_coding	ENST00000372141.5;ENST00000372142.5;ENST00000404547.4;ENST00000404576.5;ENST00000555784.4;ENST00000556918.4;ENST00000602794.4	48758;46385;48731;46111;46111;46111;46175	CGI:chr10:81874293-81875973	.
cg08155625	0.335872	0.692146	-0.356274	6.75557e-16	1.68169e-18	chr21	43431364	43431365	.	.	.	.	CGI:chr21:43425952-43428041	S_Shelf
cg03367622	0.458168	0.814111	-0.355943	4.16811e-14	6.2544e-17	chr7	145270292	145270293	AC004911.2	processed_pseudogene	ENST00000416316.1	777	CGI:chr7:144835669-144836160	.
cg06690548	0.418973	0.774763	-0.35579	3.39206e-15	6.89243e-18	chr4	138241654	138241655	SLC7A11	protein_coding	ENST00000280612.8	696	CGI:chr4:138560580-138560842	.
cg10810394	0.438481	0.794175	-0.355694	1.15692e-10	7.18393e-14	chr19	12776166	12776167	HOOK2;HOOK2;HOOK2;HOOK2;HOOK2;HOOK2;HOOK2;HOOK2;HOOK2;HOOK2;HOOK2;HOOK2;HOOK2;HOOK2;HOOK2;HOOK2	protein_coding;protein_coding;protein_coding;protein_coding;protein_coding;protein_coding;protein_coding;protein_coding;protein_coding;protein_coding;protein_coding;protein_coding;protein_coding;protein_coding;protein_coding;protein_coding	ENST00000264827.8;ENST00000397668.6;ENST00000586284.4;ENST00000586719.4;ENST00000587178.1;ENST00000589134.4;ENST00000589400.4;ENST00000589765.1;ENST00000589965.4;ENST00000590839.4;ENST00000591251.1;ENST00000591641.4;ENST00000592079.4;ENST00000592512.1;ENST00000592808.1;ENST00000593143.4	-545;-642;-626;2254;-595;-621;2247;96575;-632;2255;2227;2281;2292;2244;-593;16417	CGI:chr19:12774942-12775705	S_Shore
cg12492380	0.41513	0.770666	-0.355536	1.16435e-15	2.7033e-18	chr7	99274546	99274547	MYH16	unitary_pseudogene	ENST00000439784.4	35751	CGI:chr7:99325612-99326352	.
cg04744713	0.280343	0.635857	-0.355514	5.71999e-18	2.57657e-20	chr8	141507340	141507341	MROH5;MROH5;MROH5;MROH5	polymorphic_pseudogene;polymorphic_pseudogene;polymorphic_pseudogene;polymorphic_pseudogene	ENST00000430863.4;ENST00000521053.4;ENST00000523857.4;ENST00000621837.1	-109;-109;-109;-109	CGI:chr8:141518085-141518929	.
cg00347938	0.620438	0.975934	-0.355496	8.00578e-12	6.61244e-15	chr11	69654345	69654346	CCND1;ORAOV1;ORAOV1;ORAOV1	protein_coding;protein_coding;protein_coding;protein_coding	ENST00000227507.2;ENST00000538554.5;ENST00000542515.4;ENST00000569105.4	13257;21000;4086;18951	CGI:chr11:69654042-69654384	Island
cg14585967	0.380336	0.735818	-0.355482	1.88613e-21	2.48175e-23	chr9	115373431	115373432	2019-12-01	protein_coding	ENST00000374016.4	231612	CGI:chr9:114611204-114611796	.
cg11854928	0.579671	0.935054	-0.355383	4.63555e-10	2.50145e-13	chr12	117330949	117330950	NOS1;NOS1;NOS1;NOS1	protein_coding;protein_coding;protein_coding;protein_coding	ENST00000317775.9;ENST00000338101.7;ENST00000344089.4;ENST00000618760.3	30829;126;131;30854	CGI:chr12:117360271-117361643	.
cg15831875	0.40001	0.755349	-0.355339	4.21919e-09	1.85436e-12	chr1	245823392	245823393	SMYD3;SMYD3;SMYD3;SMYD3;SMYD3;SMYD3;SMYD3;SMYD3	protein_coding;protein_coding;protein_coding;protein_coding;protein_coding;protein_coding;protein_coding;protein_coding	ENST00000366516.4;ENST00000366517.4;ENST00000470510.4;ENST00000483072.4;ENST00000488153.4;ENST00000490107.4;ENST00000493441.4;ENST00000630181.1	107432;132711;106546;35256;165147;683866;165171;531690	CGI:chr1:245687875-245689212	.
cg09329079	0.520586	0.875785	-0.355199	8.12831e-11	5.2349e-14	chr7	1543198	1543199	TMEM184A	protein_coding	ENST00000297477.8	13233	CGI:chr7:1544418-1544709	N_Shore
cg10415509	0.38149	0.736643	-0.355154	5.64893e-12	4.85721e-15	chr21	45456990	45456991	COL18A1;COL18A1;COL18A1	protein_coding;protein_coding;protein_coding	ENST00000355480.8;ENST00000359759.7;ENST00000400337.5	1500;1458;51852	CGI:chr21:45456254-45456838	S_Shore
cg08836861	0.379997	0.735126	-0.355129	6.50627e-16	1.62836e-18	chr16	69723964	69723965	NQO1;NQO1;NQO1;NQO1;NQO1;NQO1;NQO1	protein_coding;protein_coding;protein_coding;protein_coding;protein_coding;protein_coding;protein_coding	ENST00000320623.8;ENST00000379046.5;ENST00000379047.6;ENST00000439109.5;ENST00000561500.4;ENST00000564043.1;ENST00000569118.1	2988;2621;2705;2597;2543;2597;2562	CGI:chr16:69726390-69726603	N_Shelf
cg12273284	0.15116	0.506273	-0.355113	1.09943e-20	1.10258e-22	chr10	12448845	12448846	CAMK1D;CAMK1D;CAMK1D	protein_coding;protein_coding;protein_coding	ENST00000378845.4;ENST00000487696.1;ENST00000619168.3	99111;99192;99362	CGI:chr10:12348803-12350590	.
cg08797598	0.530918	0.885983	-0.355065	3.1251e-11	2.22179e-14	chr7	4711980	4711981	FOXK1	protein_coding	ENST00000328914.4	29670	CGI:chr7:4718171-4718406	.
cg12886862	0.610588	0.965554	-0.354966	9.29384e-10	4.70132e-13	chr10	2444956	2444957	.	.	.	.	CGI:chr10:2501271-2501929	.
cg06020182	0.483842	0.838784	-0.354941	1.06686e-14	1.87309e-17	chr2	365232	365233	.	.	.	.	CGI:chr2:314828-315170	.
cg04960007	0.33607	0.690884	-0.354814	2.57036e-21	3.25951e-23	chr17	5916974	5916975	WSCD1;WSCD1	protein_coding;protein_coding	ENST00000563763.4;ENST00000573619.1	144739;144047	CGI:chr17:6069995-6071129	.
cg04438395	0.391784	0.746568	-0.354784	5.99705e-12	5.12756e-15	chr10	130401918	130401919	.	.	.	.	CGI:chr10:130567421-130567717	.
cg25416582	0.486746	0.841469	-0.354723	2.85699e-12	2.63838e-15	chr5	2094918	2094919	.	.	.	.	CGI:chr5:2111722-2112370	.
cg11848788	0.430489	0.785197	-0.354708	2.69491e-12	2.50452e-15	chr1	38575727	38575728	.	.	.	.	CGI:chr1:38578493-38578861	N_Shelf
cg01629435	0.487411	0.842113	-0.354701	2.46607e-13	2.99956e-16	chr2	73926190	73926191	DGUOK;DGUOK;DGUOK;DGUOK;DGUOK;DGUOK;DGUOK;DGUOK	protein_coding;protein_coding;protein_coding;protein_coding;protein_coding;protein_coding;protein_coding;protein_coding	ENST00000264093.7;ENST00000348222.2;ENST00000418996.4;ENST00000462551.1;ENST00000462685.1;ENST00000489796.4;ENST00000493055.1;ENST00000629438.1	-637;-637;-686;-704;-708;-705;-719;-637	CGI:chr2:73926726-73927154	N_Shore
cg26202762	0.426888	0.781429	-0.354541	4.38147e-18	2.04469e-20	chr15	25187089	25187090	SNHG14;SNORD115-10	processed_transcript;snoRNA	ENST00000424208.4;ENST00000365073.1	5245;-448	CGI:chr15:24954888-24955907	.
cg05116443	0.494468	0.84897	-0.354502	2.87997e-09	1.30946e-12	chr20	63931327	63931328	DNAJC5;DNAJC5	protein_coding;protein_coding	ENST00000360864.7;ENST00000470551.1	36144;36144	CGI:chr20:63931192-63931509	Island
cg00025405	0.339843	0.69434	-0.354497	1.00136e-21	1.46643e-23	chr5	2135749	2135750	.	.	.	.	CGI:chr5:2136683-2137191	N_Shore
cg09664215	0.486113	0.840598	-0.354485	4.58937e-16	1.19072e-18	chr1	158355464	158355465	CD1E;CD1E;CD1E;CD1E;CD1E;CD1E;CD1E;CD1E;CD1E;CD1E;CD1E;CD1E;CD1E;CD1E	protein_coding;protein_coding;protein_coding;protein_coding;protein_coding;protein_coding;protein_coding;protein_coding;protein_coding;protein_coding;protein_coding;protein_coding;protein_coding;protein_coding	ENST00000368154.4;ENST00000368155.6;ENST00000368156.4;ENST00000368157.4;ENST00000368160.6;ENST00000368161.6;ENST00000368162.2;ENST00000368163.6;ENST00000368164.6;ENST00000368165.6;ENST00000368166.6;ENST00000368167.6;ENST00000444681.5;ENST00000452291.5	1474;1474;1474;1474;1474;1474;-431;1553;1547;1580;1578;1713;1767;1619	CGI:chr1:158180830-158181713	.
cg09062961	0.49956	0.853857	-0.354298	2.57141e-13	3.11363e-16	chr2	1209049	1209050	SNTG2;SNTG2;SNTG2;SNTG2;SNTG2;SNTG2;SNTG2	protein_coding;protein_coding;protein_coding;protein_coding;protein_coding;protein_coding;protein_coding	ENST00000308624.8;ENST00000407292.1;ENST00000463442.4;ENST00000467759.4;ENST00000475201.4;ENST00000494178.1;ENST00000498321.1	258180;258109;106502;45801;45801;45485;-81	CGI:chr2:1167330-1168134	.
cg10473367	0.3376	0.69177	-0.35417	2.4866e-17	9.29322e-20	chr16	1259549	1259550	.	.	.	.	CGI:chr16:1259156-1259414	S_Shore
cg25078649	0.525204	0.879286	-0.354082	2.16129e-10	1.25761e-13	chr6	43511091	43511092	LRRC73;POLR1C	protein_coding;protein_coding	ENST00000372441.1;ENST00000428025.5	-404;1388	CGI:chr6:43509483-43510815	S_Shore
cg08822897	0.50899	0.863066	-0.354077	7.43435e-10	3.83553e-13	chr11	64490631	64490632	.	.	.	.	CGI:chr11:64448939-64449237	.
cg20985269	0.383218	0.737199	-0.353981	8.05935e-20	6.1859e-22	chr1	158607019	158607020	OR10Z1	protein_coding	ENST00000361284.1	579	CGI:chr1:158180830-158181713	.
cg09643186	0.459505	0.81346	-0.353955	4.41844e-14	6.57506e-17	chr14	64942734	64942735	CHURC1;CHURC1;CHURC1-FNTB;CHURC1-FNTB;CHURC1-FNTB;CHURC1-FNTB;GPX2;GPX2;GPX2;GPX2;GPX2	protein_coding;protein_coding;protein_coding;protein_coding;protein_coding;protein_coding;protein_coding;protein_coding;protein_coding;protein_coding;protein_coding	ENST00000551093.4;ENST00000551947.4;ENST00000549987.1;ENST00000551823.1;ENST00000552941.4;ENST00000553743.4;ENST00000389614.5;ENST00000553522.1;ENST00000557049.1;ENST00000557323.1;ENST00000612794.1	28256;28290;28240;18697;28248;18697;80;12;-13;13;172	CGI:chr14:64914357-64914664	.
cg11501364	0.520517	0.874149	-0.353631	4.31064e-12	3.81762e-15	chr13	99199406	99199407	UBAC2;UBAC2;UBAC2;UBAC2;UBAC2-AS1;UBAC2-AS1	protein_coding;protein_coding;protein_coding;protein_coding;lincRNA;lincRNA	ENST00000355700.8;ENST00000403766.6;ENST00000468067.4;ENST00000473091.4;ENST00000426037.5;ENST00000445737.2	-1369;-1369;-1482;-1487;1305;1305	CGI:chr13:99200132-99201298	N_Shore
cg21813377	0.460386	0.813821	-0.353435	2.77511e-17	1.0208e-19	chr1	4132757	4132758	.	.	.	.	CGI:chr1:4132573-4133183	Island
cg05978707	0.439333	0.792723	-0.353391	5.97462e-15	1.12759e-17	chr2	1208690	1208691	SNTG2;SNTG2;SNTG2;SNTG2;SNTG2;SNTG2;SNTG2	protein_coding;protein_coding;protein_coding;protein_coding;protein_coding;protein_coding;protein_coding	ENST00000308624.8;ENST00000407292.1;ENST00000463442.4;ENST00000467759.4;ENST00000475201.4;ENST00000494178.1;ENST00000498321.1	257821;257750;106143;45442;45442;45126;-440	CGI:chr2:1167330-1168134	.
cg16617297	0.597863	0.951171	-0.353308	1.73773e-09	8.28957e-13	chr7	130897413	130897414	AC016831.7;AC058791.1;AC058791.1;AC058791.1	lincRNA;lincRNA;lincRNA;lincRNA	ENST00000447430.1;ENST00000418546.1;ENST00000432045.5;ENST00000447307.4	43692;15785;15898;15764	CGI:chr7:130733126-130734376	.
cg23087707	0.50491	0.858081	-0.35317	6.37907e-12	5.41386e-15	chr12	132287283	132287284	GALNT9;GALNT9;GALNT9	protein_coding;protein_coding;protein_coding	ENST00000328957.11;ENST00000424720.5;ENST00000540493.1	41921;42067;-811	CGI:chr12:132286000-132286370	S_Shore
cg02185007	0.349034	0.702187	-0.353153	6.82172e-14	9.59262e-17	chr8	116574840	116574841	.	.	.	.	CGI:chr8:116755691-116755900	.
cg21184216	0.429566	0.782474	-0.352908	1.06062e-12	1.09374e-15	chr5	103262333	103262334	C5orf30;C5orf30;C5orf30	protein_coding;protein_coding;protein_coding	ENST00000319933.5;ENST00000510890.1;ENST00000515669.4	3630;2908;3296	CGI:chr5:103258734-103259849	S_Shelf
cg04760448	0.372733	0.725625	-0.352892	2.46269e-14	3.91703e-17	chr21	45470935	45470936	COL18A1;COL18A1;COL18A1	protein_coding;protein_coding;protein_coding	ENST00000355480.8;ENST00000359759.7;ENST00000400337.5	15445;15403;65797	CGI:chr21:45470934-45471201	Island
cg10437722	0.423083	0.775928	-0.352845	4.39067e-15	8.59231e-18	chr17	36731234	36731235	.	.	.	.	CGI:chr17:36703963-36704247	.
cg18131582	0.386969	0.739808	-0.352838	2.08876e-13	2.59473e-16	chr1	183943171	183943172	COLGALT2;COLGALT2;COLGALT2	protein_coding;protein_coding;protein_coding	ENST00000361927.7;ENST00000367520.3;ENST00000367521.4	94559;21330;3448	CGI:chr1:184036225-184037632	.
cg26578156	0.368254	0.720974	-0.35272	5.90996e-20	4.7388e-22	chr16	49841150	49841151	ZNF423;ZNF423	protein_coding;protein_coding	ENST00000562520.1;ENST00000563137.5	16770;14986	CGI:chr16:49838538-49839015	S_Shelf
cg16641358	0.468953	0.821642	-0.352689	2.55409e-14	4.04128e-17	chr5	15930329	15930330	FBXL7;FBXL7;FBXL7	protein_coding;protein_coding;protein_coding	ENST00000329673.8;ENST00000504595.1;ENST00000510662.1	2440;430132;428890	CGI:chr5:15927979-15928409	S_Shore
cg22263031	0.57561	0.928251	-0.352642	1.92133e-09	9.08062e-13	chr15	96780718	96780719	SPATA8-AS1;SPATA8-AS1	antisense;antisense	ENST00000558722.1;ENST00000560888.4	2595;937	CGI:chr15:96416111-96417301	.
cg08160063	0.497388	0.85002	-0.352631	5.16355e-15	9.91628e-18	chr16	7654959	7654960	RBFOX1;RBFOX1;RBFOX1;RBFOX1;RBFOX1;RBFOX1;RBFOX1;RBFOX1;RBFOX1;RBFOX1;RBFOX1;RBFOX1;RBFOX1	protein_coding;protein_coding;protein_coding;protein_coding;protein_coding;protein_coding;protein_coding;protein_coding;protein_coding;protein_coding;protein_coding;protein_coding;protein_coding	ENST00000311745.8;ENST00000340209.7;ENST00000355637.7;ENST00000422070.7;ENST00000436368.5;ENST00000535565.5;ENST00000547338.4;ENST00000547372.4;ENST00000550418.4;ENST00000552089.4;ENST00000553186.4;ENST00000567470.1;ENST00000620507.3	322208;322208;322208;1635255;322208;1171779;881149;1635365;1635827;1171572;1635827;1092;322208	CGI:chr16:7653809-7654088	S_Shore
cg23033158	0.429829	0.782432	-0.352602	7.05694e-15	1.30719e-17	chr3	117854219	117854220	RP11-384F7.2	lincRNA	ENST00000484092.1	143374	CGI:chr3:117996717-117997717	.
cg26975787	0.487082	0.839563	-0.35248	8.2848e-19	4.72261e-21	chr12	2504612	2504613	CACNA1C;CACNA1C;CACNA1C;CACNA1C;CACNA1C;CACNA1C;CACNA1C;CACNA1C;CACNA1C;CACNA1C;CACNA1C;CACNA1C;CACNA1C;CACNA1C;CACNA1C;CACNA1C;CACNA1C;CACNA1C;CACNA1C;CACNA1C;CACNA1C;CACNA1C;CACNA1C;CACNA1C;CACNA1C;CACNA1C;CACNA1C;CACNA1C;CACNA1C	protein_coding;protein_coding;protein_coding;protein_coding;protein_coding;protein_coding;protein_coding;protein_coding;protein_coding;protein_coding;protein_coding;protein_coding;protein_coding;protein_coding;protein_coding;protein_coding;protein_coding;protein_coding;protein_coding;protein_coding;protein_coding;protein_coding;protein_coding;protein_coding;protein_coding;protein_coding;protein_c…	ENST00000327702.10;ENST00000335762.8;ENST00000344100.6;ENST00000347598.7;ENST00000399591.4;ENST00000399595.4;ENST00000399597.4;ENST00000399601.4;ENST00000399603.4;ENST00000399606.4;ENST00000399617.4;ENST00000399621.4;ENST00000399629.4;ENST00000399634.4;ENST00000399637.4;ENST00000399638.4;ENST00000399641.4;ENST00000399644.4;ENST00000399649.4;ENST00000399655.4;ENST00000402845.6;ENST00000406454.6;EN…	451048;451313;451048;451048;451048;451048;451048;451048;451048;451048;451048;451048;451048;451048;451048;451048;451048;451048;451048;451313;451048;451048;451073;175;55635;55635;55635;55635;55635	CGI:chr12:2679448-2679713	.
cg20968743	0.142447	0.494919	-0.352472	4.65989e-28	8.78229e-29	chr11	44862414	44862415	TSPAN18;TSPAN18;TSPAN18;TSPAN18;TSPAN18;TSPAN18;TSPAN18	protein_coding;protein_coding;protein_coding;protein_coding;protein_coding;protein_coding;protein_coding	ENST00000340160.6;ENST00000520358.5;ENST00000520837.4;ENST00000520999.5;ENST00000533080.4;ENST00000533202.4;ENST00000533786.4	97987;135301;2810;135239;135310;135602;135948	CGI:chr11:44949497-44951134	.
cg13056990	0.50269	0.855123	-0.352432	2.5661e-10	1.46634e-13	chr1	4676039	4676040	AJAP1;AJAP1	protein_coding;protein_coding	ENST00000378190.6;ENST00000378191.4	21306;20993	CGI:chr1:4666516-4666807	.
cg11188031	0.499492	0.851915	-0.352423	8.60119e-12	7.04438e-15	chr5	157058637	157058638	HAVCR1;HAVCR1;HAVCR1;HAVCR1;HAVCR1	protein_coding;protein_coding;protein_coding;protein_coding;protein_coding	ENST00000339252.6;ENST00000518745.1;ENST00000522693.4;ENST00000523175.4;ENST00000625904.1	-160;-240;483;319;-160	CGI:chr5:157142565-157143056	.
cg25763127	0.532129	0.884551	-0.352422	3.06615e-12	2.81224e-15	chr10	33238335	33238336	NRP1;NRP1;NRP1;NRP1;NRP1;NRP1;NRP1;NRP1;NRP1	protein_coding;protein_coding;protein_coding;protein_coding;protein_coding;protein_coding;protein_coding;protein_coding;protein_coding	ENST00000265371.7;ENST00000374816.6;ENST00000374821.8;ENST00000374822.7;ENST00000374823.8;ENST00000374867.5;ENST00000374875.4;ENST00000395995.4;ENST00000432372.5	97928;96188;96188;96308;96048;96571;96302;96571;96744	CGI:chr10:33334192-33337269	.
cg24278165	0.601289	0.953632	-0.352343	1.24772e-11	9.76634e-15	chr8	23226038	23226039	RP11-1149O23.3;RP11-1149O23.3;RP11-1149O23.4;TNFRSF10A;TNFRSF10A;TNFRSF10A	processed_transcript;processed_transcript;antisense;protein_coding;protein_coding;protein_coding	ENST00000500853.1;ENST00000522600.1;ENST00000511929.2;ENST00000221132.6;ENST00000524158.4;ENST00000613472.1	816;403;4878;-911;-1437;-976	CGI:chr8:23224443-23225462	S_Shore
cg00938877	0.507115	0.85932	-0.352206	2.25896e-11	1.66065e-14	chr1	248036983	248036984	OR2L13;OR2L2	protein_coding;protein_coding	ENST00000366478.2;ENST00000366479.3	99791;-1286	CGI:chr1:247937023-247937424	.
cg20506659	0.297266	0.649446	-0.35218	2.82573e-22	4.9327e-24	chr6	33165166	33165167	COL11A2;COL11A2;COL11A2;COL11A2	protein_coding;protein_coding;protein_coding;protein_coding	ENST00000341947.5;ENST00000361917.4;ENST00000374708.7;ENST00000477772.1	27303;27303;27334;12728	CGI:chr6:33161514-33161941	S_Shelf
cg15122358	0.592991	0.94517	-0.352179	1.12614e-12	1.15349e-15	chr10	132993007	132993008	.	.	.	.	CGI:chr10:132993672-132993941	N_Shore
cg26570714	0.35968	0.711801	-0.352121	9.3712e-09	3.85896e-12	chr1	248592850	248592851	OR2T10	protein_coding	ENST00000330500.3	919	CGI:chr1:248691729-248692169	.
cg27508281	0.545717	0.897835	-0.352118	1.59248e-12	1.56959e-15	chr16	86993716	86993717	.	.	.	.	CGI:chr16:86931665-86931890	.
cg13152531	0.520397	0.872374	-0.351976	2.40652e-15	5.10207e-18	chr15	24557482	24557483	PWRN1;PWRN1;PWRN1;PWRN1;PWRN1;PWRN1	lincRNA;lincRNA;lincRNA;lincRNA;lincRNA;lincRNA	ENST00000565241.1;ENST00000565295.4;ENST00000567647.4;ENST00000568045.4;ENST00000568609.4;ENST00000569908.1	-736;9685;-691;23786;-671;-677	CGI:chr15:24675466-24676105	.
cg06790305	0.443081	0.79505	-0.351968	6.00639e-16	1.51841e-18	chr21	31039872	31039873	KRTAP19-8	protein_coding	ENST00000382822.2	-1395	CGI:chr21:31251828-31252066	.
cg22355525	0.468232	0.82019	-0.351958	3.25183e-14	5.01494e-17	chr6	28922099	28922100	TRIM27;TRIM27;TRIM27;TRIM27	protein_coding;protein_coding;protein_coding;protein_coding	ENST00000377194.6;ENST00000377199.3;ENST00000481474.4;ENST00000498117.1	1890;1891;1815;-122	CGI:chr6:28923174-28924236	N_Shore
cg02119938	0.412882	0.76482	-0.351938	2.4197e-15	5.12804e-18	chr15	78212709	78212710	ACSBG1;ACSBG1;ACSBG1;ACSBG1;ACSBG1;ACSBG1;ACSBG1;ACSBG1;ACSBG1	protein_coding;protein_coding;protein_coding;protein_coding;protein_coding;protein_coding;protein_coding;protein_coding;protein_coding	ENST00000258873.7;ENST00000557935.1;ENST00000558130.1;ENST00000558793.1;ENST00000558828.4;ENST00000559241.4;ENST00000559707.4;ENST00000560124.4;ENST00000560817.4	21999;21894;21817;32980;32980;791;21866;21817;32980	CGI:chr15:78264063-78265200	.
cg09094037	0.468391	0.820308	-0.351917	5.17112e-14	7.52397e-17	chr16	76308723	76308724	CNTNAP4;CNTNAP4;CNTNAP4;CNTNAP4;CNTNAP4;CNTNAP4;CNTNAP4	protein_coding;protein_coding;protein_coding;protein_coding;protein_coding;protein_coding;protein_coding	ENST00000307431.11;ENST00000377504.7;ENST00000463177.1;ENST00000471618.4;ENST00000478060.4;ENST00000611870.3;ENST00000622250.3	31444;31444;-1158;-1131;-1175;31444;31059	CGI:chr16:76235079-76235295	.
cg12085619	0.389919	0.74182	-0.351902	6.78103e-14	9.54307e-17	chr1	248473154	248473155	OR2T3	protein_coding	ENST00000359594.3	-198	CGI:chr1:248691729-248692169	.
cg05316785	0.331142	0.683027	-0.351886	9.41726e-16	2.24832e-18	chr7	54538170	54538171	.	.	.	.	CGI:chr7:54542041-54542447	N_Shelf
cg10765655	0.438747	0.790584	-0.351837	3.40928e-15	6.91939e-18	chr8	57276350	57276351	.	.	.	.	CGI:chr8:57279940-57280325	N_Shelf
cg13449257	0.475381	0.8271	-0.351719	2.5799e-13	3.12283e-16	chr9	134463282	134463283	.	.	.	.	CGI:chr9:134464535-134466956	N_Shore
cg03168749	0.485034	0.836665	-0.351631	1.22371e-16	3.70982e-19	chr11	124543678	124543679	OR8B12	protein_coding	ENST00000306842.2	2	CGI:chr11:124622768-124623257	.
cg27149471	0.435185	0.786704	-0.351518	4.53909e-16	1.17811e-18	chr11	56276038	56276039	OR5T1	protein_coding	ENST00000313033.3	398	CGI:chr11:55874234-55874644	.
cg20245568	0.495868	0.847326	-0.351459	3.20824e-15	6.56465e-18	chr11	58358711	58358712	OR5B17	protein_coding	ENST00000357377.3	359	CGI:chr11:58578200-58579848	.
cg00715811	0.453488	0.804935	-0.351447	4.38425e-13	5.02534e-16	chr1	247490838	247490839	OR2W5;OR2W5	transcribed_unprocessed_pseudogene;transcribed_unprocessed_pseudogene	ENST00000366492.1;ENST00000522351.1	-291;-231	CGI:chr1:247518097-247518649	.
cg16711332	0.554632	0.906027	-0.351395	1.00359e-10	6.31813e-14	chr1	6471667	6471668	PLEKHG5;PLEKHG5;PLEKHG5;PLEKHG5;PLEKHG5;PLEKHG5;PLEKHG5;PLEKHG5;PLEKHG5;PLEKHG5;PLEKHG5;PLEKHG5	protein_coding;protein_coding;protein_coding;protein_coding;protein_coding;protein_coding;protein_coding;protein_coding;protein_coding;protein_coding;protein_coding;protein_coding	ENST00000340850.8;ENST00000377725.4;ENST00000377728.6;ENST00000377732.4;ENST00000377740.3;ENST00000377748.4;ENST00000400913.4;ENST00000400915.6;ENST00000487949.4;ENST00000489097.4;ENST00000535355.4;ENST00000537245.4	18914;18904;20034;25030;48395;48343;14288;25724;-83;5922;13803;25430	CGI:chr1:6471411-6471676	Island
cg16366073	0.498747	0.850121	-0.351374	2.70225e-12	2.51038e-15	chr21	30813258	30813259	KRTAP8-1	protein_coding	ENST00000329621.5	-5	CGI:chr21:31251828-31252066	.
cg13270350	0.471539	0.822907	-0.351368	5.81017e-09	2.4851e-12	chr2	239144704	239144705	HDAC4;HDAC4;HDAC4;HDAC4;HDAC4;HDAC4;HDAC4	protein_coding;protein_coding;protein_coding;protein_coding;protein_coding;protein_coding;protein_coding	ENST00000345617.6;ENST00000461113.4;ENST00000463007.4;ENST00000493582.4;ENST00000535493.4;ENST00000543185.4;ENST00000553145.1	256246;10310;153936;256951;153827;256246;10872	CGI:chr2:239139630-239139906	.
cg26120093	0.568227	0.919584	-0.351357	1.71913e-11	1.30195e-14	chr14	104134213	104134214	.	.	.	.	CGI:chr14:104135622-104139335	N_Shore
cg01687040	0.383257	0.734556	-0.3513	4.10178e-19	2.57974e-21	chr12	54649775	54649776	DCD;DCD;DCD	protein_coding;protein_coding;protein_coding	ENST00000293371.9;ENST00000456047.2;ENST00000546807.4	-1281;-1281;-1281	CGI:chr12:54588149-54588807	.
cg07236958	0.354597	0.705767	-0.35117	1.26684e-20	1.249e-22	chr8	139612484	139612485	KCNK9;KCNK9;KCNK9	protein_coding;protein_coding;protein_coding	ENST00000519923.1;ENST00000522317.4;ENST00000523477.1	3564;90558;4522	CGI:chr8:139618853-139619089	.
cg25320749	0.413735	0.764883	-0.351148	7.36158e-16	1.8132e-18	chr6	28526955	28526956	GPX5;GPX5;GPX5;GPX5;GPX6	protein_coding;protein_coding;protein_coding;protein_coding;protein_coding	ENST00000412168.5;ENST00000442674.5;ENST00000469384.1;ENST00000483784.1;ENST00000483058.1	1029;-1372;942;-1377;1261	CGI:chr6:28587086-28587347	.
cg16100355	0.595178	0.946298	-0.351119	8.37629e-09	3.481e-12	chr13	112994293	112994294	MCF2L;MCF2L;MCF2L;MCF2L;MCF2L	protein_coding;protein_coding;protein_coding;protein_coding;protein_coding	ENST00000375608.6;ENST00000397030.4;ENST00000421756.4;ENST00000433807.4;ENST00000535094.5	99914;25792;14980;9174;25071	CGI:chr13:112994029-112994396	Island
cg06789840	0.454253	0.805276	-0.351023	1.53648e-12	1.5217e-15	chr8	1294023	1294024	.	.	.	.	CGI:chr8:1297411-1298205	N_Shelf
cg10999347	0.471002	0.822015	-0.351014	2.72068e-12	2.52516e-15	chr2	2601691	2601692	.	.	.	.	CGI:chr2:2650336-2650586	.
cg24327361	0.49755	0.848539	-0.350989	2.36859e-13	2.89609e-16	chr8	4725864	4725865	CSMD1;CSMD1;CSMD1;CSMD1	protein_coding;protein_coding;protein_coding;protein_coding	ENST00000400186.6;ENST00000520002.4;ENST00000602557.4;ENST00000602723.4	268838;269109;269109;268838	CGI:chr8:4991446-4995113	.
cg22709144	0.416181	0.767168	-0.350987	2.37583e-13	2.90342e-16	chr6	28510802	28510803	GPX6;GPX6;GPX6;GPX6	protein_coding;protein_coding;protein_coding;protein_coding	ENST00000361902.4;ENST00000474923.1;ENST00000483058.1;ENST00000612264.3	4992;4986;17414;4992	CGI:chr6:28587086-28587347	.
cg16711011	0.496136	0.846879	-0.350743	3.68056e-14	5.5972e-17	chr2	568198	568199	AC093326.3	lincRNA	ENST00000444079.1	9993	CGI:chr2:558069-558469	.
cg18857759	0.340813	0.691482	-0.350669	1.22776e-14	2.12048e-17	chr1	247947359	247947360	OR2L13;OR2L8;OR2L8	protein_coding;polymorphic_pseudogene;protein_coding	ENST00000366478.2;ENST00000623922.1;ENST00000357191.3	10167;-1500;-1500	CGI:chr1:247937023-247937424	.
cg18366169	0.386941	0.7375	-0.35056	1.78636e-15	3.95587e-18	chr5	1948761	1948762	RP11-259O2.1;RP11-259O2.1	lincRNA;lincRNA	ENST00000511693.1;ENST00000513419.1	14897;8988	CGI:chr5:1948880-1949113	N_Shore
cg21163617	0.428918	0.779416	-0.350498	6.50905e-12	5.50814e-15	chr7	157591966	157591967	PTPRN2;PTPRN2;PTPRN2;PTPRN2	protein_coding;protein_coding;protein_coding;protein_coding	ENST00000389413.6;ENST00000389416.7;ENST00000389418.7;ENST00000409483.4	995808;995746;995714;995823	CGI:chr7:157594361-157594630	N_Shelf
cg12769705	0.416286	0.766752	-0.350466	1.2539e-10	7.72786e-14	chr10	123762041	123762042	CPXM2;CPXM2;CPXM2	protein_coding;protein_coding;protein_coding	ENST00000241305.3;ENST00000368854.6;ENST00000615851.3	129774;178227;129944	CGI:chr10:123666014-123667126	.
cg18324583	0.396246	0.746664	-0.350418	3.89221e-15	7.76445e-18	chr5	143595518	143595519	.	.	.	.	CGI:chr5:143402506-143405506	.
cg05305099	0.411406	0.761807	-0.350401	6.0639e-21	6.5912e-23	chr16	57623602	57623603	GPR56;GPR56;GPR56;GPR56;GPR56;GPR56;GPR56;GPR56;GPR56;GPR56;GPR56;GPR56;GPR56;GPR56;GPR56;GPR56;GPR56;GPR56;GPR56;GPR56;RP11-405F3.5	protein_coding;protein_coding;protein_coding;protein_coding;protein_coding;protein_coding;protein_coding;protein_coding;protein_coding;protein_coding;protein_coding;protein_coding;protein_coding;protein_coding;protein_coding;protein_coding;protein_coding;protein_coding;protein_coding;protein_coding;antisense	ENST00000561833.4;ENST00000561872.4;ENST00000561988.4;ENST00000562003.4;ENST00000562101.4;ENST00000562673.4;ENST00000563548.4;ENST00000564907.4;ENST00000564912.4;ENST00000565314.4;ENST00000565587.4;ENST00000566778.4;ENST00000567553.4;ENST00000567835.4;ENST00000568791.4;ENST00000568908.4;ENST00000568909.4;ENST00000569372.4;ENST00000569531.4;ENST00000570044.4;ENST00000563251.1	2807;3555;3555;3497;3555;3861;3505;3850;3863;3864;12949;3556;3868;3524;3908;3659;3603;3505;2265;3907;8046	CGI:chr16:57535936-57536932	.
cg17108958	0.420839	0.771127	-0.350288	8.40598e-16	2.03535e-18	chr1	220956203	220956204	.	.	.	.	CGI:chr1:220895440-220895817	.
cg19596804	0.387593	0.737854	-0.350261	2.71419e-15	5.66806e-18	chr1	238377340	238377341	.	.	.	.	CGI:chr1:237783887-237784148	.
cg23303108	0.58005	0.930288	-0.350238	4.91447e-12	4.28356e-15	chr8	23226065	23226066	RP11-1149O23.3;RP11-1149O23.3;RP11-1149O23.4;TNFRSF10A;TNFRSF10A;TNFRSF10A	processed_transcript;processed_transcript;antisense;protein_coding;protein_coding;protein_coding	ENST00000500853.1;ENST00000522600.1;ENST00000511929.2;ENST00000221132.6;ENST00000524158.4;ENST00000613472.1	843;430;4851;-938;-1464;-1003	CGI:chr8:23224443-23225462	S_Shore
cg03072195	0.573634	0.923796	-0.350162	3.36389e-13	3.96218e-16	chr17	53822754	53822755	KIF2B	protein_coding	ENST00000268919.5	-148	CGI:chr17:53757289-53757539	.
cg21029504	0.553202	0.903281	-0.350079	4.21791e-15	8.30531e-18	chr22	49634742	49634743	C22orf34;C22orf34;C22orf34;C22orf34	lincRNA;lincRNA;lincRNA;lincRNA	ENST00000400023.4;ENST00000405854.4;ENST00000414287.4;ENST00000416411.1	22801;22689;22763;22716	CGI:chr22:49631437-49632767	S_Shore
cg13760060	0.436412	0.78643	-0.350018	2.46553e-16	6.89521e-19	chr14	72745869	72745870	DPF3;DPF3;DPF3;DPF3;DPF3;DPF3;DPF3	protein_coding;protein_coding;protein_coding;protein_coding;protein_coding;protein_coding;protein_coding	ENST00000366353.7;ENST00000381216.7;ENST00000541685.4;ENST00000546183.1;ENST00000556509.4;ENST00000610283.3;ENST00000614862.3	146781;148233;148248;148233;148220;146781;148248	CGI:chr14:72892081-72894226	.
cg12743248	0.292324	0.642326	-0.350003	2.06366e-23	5.20626e-25	chr8	48724281	48724282	EFCAB1;EFCAB1;EFCAB1;EFCAB1;EFCAB1	protein_coding;protein_coding;protein_coding;protein_coding;protein_coding	ENST00000262103.6;ENST00000433756.1;ENST00000521002.4;ENST00000521701.4;ENST00000523008.4	10952;11031;10954;11021;5509	CGI:chr8:48735143-48735429	.
cg19791043	0.410317	0.760305	-0.349988	2.06635e-14	3.34916e-17	chr16	1066361	1066362	RP11-161M6.5;SSTR5-AS1;SSTR5-AS1	lincRNA;processed_transcript;processed_transcript	ENST00000564390.1;ENST00000565992.1;ENST00000569832.4	1120;7243;12313	CGI:chr16:1065368-1066468	Island
cg07879681	0.434601	0.784523	-0.349922	9.74423e-15	1.73341e-17	*	-1	-1	.	.	.	.	.	.
cg10874111	0.507983	0.857878	-0.349895	2.13431e-11	1.57913e-14	chr7	159007057	159007058	LINC00689;LINC00689;LINC00689	processed_transcript;processed_transcript;processed_transcript	ENST00000417032.1;ENST00000438049.4;ENST00000447563.4	534;-1365;-1298	CGI:chr7:159005900-159006743	S_Shore
cg06097423	0.445133	0.794987	-0.349854	4.37064e-16	1.13903e-18	chr12	15802090	15802091	EPS8;RP11-6B19.3	protein_coding;processed_pseudogene	ENST00000535752.4;ENST00000544148.1	80240;-1075	CGI:chr12:15788784-15789806	.
cg23154270	0.338642	0.688468	-0.349826	1.17389e-17	4.8054e-20	chr2	136769996	136769997	THSD7B;THSD7B	protein_coding;protein_coding	ENST00000409968.4;ENST00000472720.4	4450;4450	CGI:chr2:136764890-136766126	S_Shelf
cg13897627	0.408774	0.758556	-0.349782	1.43169e-23	3.91478e-25	chr16	49344586	49344587	RP11-491F9.3	TEC	ENST00000623424.1	2922	CGI:chr16:49283086-49283352	.
cg02749784	0.394073	0.743836	-0.349762	5.35093e-16	1.36434e-18	chr8	119207688	119207689	MAL2;MAL2;MAL2;MAL2	protein_coding;protein_coding;protein_coding;protein_coding	ENST00000522112.5;ENST00000531508.1;ENST00000534619.4;ENST00000614891.3	42653;-1181;-262;-684	CGI:chr8:119208149-119208982	N_Shore
cg12565335	0.461608	0.811234	-0.349625	6.60944e-13	7.21555e-16	chr2	1986470	1986471	MYT1L;MYT1L	protein_coding;protein_coding	ENST00000399161.5;ENST00000428368.5	344725;344647	CGI:chr2:1937296-1937788	.
cg17519479	0.554161	0.903721	-0.349561	4.23433e-09	1.85996e-12	chr10	1176097	1176098	.	.	.	.	CGI:chr10:1173206-1173487	S_Shelf
cg09893465	0.567815	0.917288	-0.349473	5.00772e-06	1.49153e-09	chr10	132774536	132774537	INPP5A;INPP5A;INPP5A;INPP5A	protein_coding;protein_coding;protein_coding;protein_coding	ENST00000342652.6;ENST00000368593.6;ENST00000368594.6;ENST00000445580.1	166609;236686;236715;8711	CGI:chr10:132772666-132772967	S_Shore
cg17504641	0.470886	0.82024	-0.349353	6.58038e-17	2.1646e-19	chr10	43962719	43962720	.	.	.	.	CGI:chr10:44005533-44005822	.
cg20736321	0.482962	0.83229	-0.349328	7.11946e-11	4.645e-14	chr11	1029162	1029163	MUC6	protein_coding	ENST00000421673.5	7545	CGI:chr11:1029083-1029390	Island
cg04194840	0.40046	0.749709	-0.34925	5.73599e-11	3.83218e-14	chr16	58511598	58511599	NDRG4;NDRG4;NDRG4;NDRG4;NDRG4;NDRG4;NDRG4;NDRG4;NDRG4;NDRG4;NDRG4;NDRG4;NDRG4;NDRG4;NDRG4	protein_coding;protein_coding;protein_coding;protein_coding;protein_coding;protein_coding;protein_coding;protein_coding;protein_coding;protein_coding;protein_coding;protein_coding;protein_coding;protein_coding;protein_coding	ENST00000258187.8;ENST00000356752.7;ENST00000394279.5;ENST00000394282.7;ENST00000421602.5;ENST00000562999.4;ENST00000563209.1;ENST00000563799.4;ENST00000565981.4;ENST00000566192.4;ENST00000566265.1;ENST00000568640.4;ENST00000569408.1;ENST00000569923.4;ENST00000570248.4	47932;11454;46775;47573;47296;11454;886;11454;5608;11550;2448;11490;4617;11454;11454	CGI:chr16:58515123-58516335	N_Shelf
cg25104107	0.405071	0.75432	-0.349249	6.24402e-15	1.17091e-17	chr1	152759114	152759115	KPRP;LCE1B	protein_coding;protein_coding	ENST00000606109.1;ENST00000615904.1	-448;21595	CGI:chr1:152515581-152515794	.
cg05049825	0.511514	0.860595	-0.349081	1.96281e-13	2.45527e-16	chr2	124186991	124186992	CNTNAP5	protein_coding	ENST00000431078.1	161703	CGI:chr2:124024675-124025678	.
cg23732024	0.364507	0.713483	-0.348976	2.7402e-10	1.5558e-13	chr8	73991566	73991567	LY96;LY96	protein_coding;protein_coding	ENST00000284818.5;ENST00000518893.1	213;139	CGI:chr8:73976003-73976690	.
cg00298919	0.441686	0.790653	-0.348967	7.81831e-15	1.43118e-17	chr16	86388190	86388191	.	.	.	.	CGI:chr16:86377548-86377851	.
cg04014685	0.481587	0.830526	-0.348939	3.73299e-17	1.32309e-19	chr3	115790827	115790828	.	.	.	.	CGI:chr3:115783878-115784734	.
cg26350784	0.40474	0.753627	-0.348887	1.69751e-16	4.93872e-19	chr5	155475362	155475363	.	.	.	.	CGI:chr5:155727944-155729374	.
cg09489844	0.622448	0.971327	-0.348879	4.71159e-10	2.53857e-13	chr17	81922771	81922772	MAFG;MAFG;RP11-498C9.12;SIRT7	protein_coding;protein_coding;antisense;protein_coding	ENST00000357736.7;ENST00000392366.6;ENST00000580897.1;ENST00000572902.4	4944;762;-129;-1447	CGI:chr17:81922573-81922996	Island
cg25428846	0.492079	0.840909	-0.34883	4.78286e-17	1.64037e-19	chr4	140186777	140186778	.	.	.	.	CGI:chr4:140152364-140153483	.
cg23724738	0.378645	0.727467	-0.348822	3.63911e-15	7.32215e-18	chr1	152565904	152565905	LCE3C;LCE3E	protein_coding;protein_coding	ENST00000617545.1;ENST00000368789.1	54368;869	CGI:chr1:152515581-152515794	.
cg10956848	0.52789	0.876674	-0.348784	1.24789e-09	6.13645e-13	chr22	47631892	47631893	LINC00898;RP11-191L9.4;RP11-191L9.4	lincRNA;lincRNA;lincRNA	ENST00000380990.4;ENST00000423737.4;ENST00000426452.1	-322;217;201	CGI:chr22:47212945-47213572	.
cg21862081	0.376375	0.725148	-0.348773	5.2939e-20	4.28904e-22	chr14	77303344	77303345	POMT2;POMT2;POMT2;POMT2;POMT2;POMT2;POMT2;POMT2	protein_coding;protein_coding;protein_coding;protein_coding;protein_coding;protein_coding;protein_coding;protein_coding	ENST00000261534.7;ENST00000452340.6;ENST00000553863.4;ENST00000554948.1;ENST00000555675.4;ENST00000556326.4;ENST00000556880.4;ENST00000557289.1	17541;17361;3160;16997;3147;17517;3554;1403	CGI:chr14:77320347-77321451	.
cg23179265	0.445568	0.794289	-0.34872	8.59518e-16	2.07613e-18	chr10	1402939	1402940	ADARB2	protein_coding	ENST00000381312.4	334538	CGI:chr10:1397426-1397819	.
cg08822417	0.544487	0.893177	-0.348689	1.01567e-10	6.38385e-14	chr10	1627117	1627118	ADARB2	protein_coding	ENST00000381312.4	110360	CGI:chr10:1699230-1701931	.
cg19846154	0.334743	0.683416	-0.348673	1.05159e-14	1.8486e-17	chr8	73419877	73419878	STAU2-AS1;STAU2-AS1	antisense;antisense	ENST00000517604.1;ENST00000522703.1	-198;-128	CGI:chr8:73448814-73449174	.
cg21054147	0.58478	0.933427	-0.348647	3.02314e-14	4.69948e-17	chr22	49099332	49099333	.	.	.	.	CGI:chr22:49102438-49102653	N_Shelf
cg04816803	0.270129	0.618754	-0.348625	5.12479e-18	2.33704e-20	chr10	43931355	43931356	.	.	.	.	CGI:chr10:44005533-44005822	.
cg21078966	0.471526	0.820127	-0.348602	1.62298e-16	4.74159e-19	chr18	71032546	71032547	RP11-529J17.1	processed_pseudogene	ENST00000581877.1	3775	CGI:chr18:70430570-70430860	.
cg23305899	0.248798	0.597309	-0.348511	3.91268e-21	4.58006e-23	chr14	101073152	101073153	.	.	.	.	CGI:chr14:101065306-101066047	.
cg00115458	0.165766	0.514251	-0.348485	6.05161e-28	1.02326e-28	chr6	33173528	33173529	COL11A2;COL11A2;COL11A2;COL11A2	protein_coding;protein_coding;protein_coding;protein_coding	ENST00000341947.5;ENST00000361917.4;ENST00000374708.7;ENST00000477772.1	18941;18941;18972;4366	CGI:chr6:33161514-33161941	.
cg02542748	0.441518	0.789973	-0.348455	2.2114e-15	4.74257e-18	chr10	129236599	129236600	.	.	.	.	CGI:chr10:129466684-129467446	.
cg21734996	0.495844	0.844294	-0.34845	2.90598e-18	1.4285e-20	chr4	16759206	16759207	LDB2;LDB2;LDB2;LDB2;LDB2;LDB2;LDB2;LDB2;LDB2;LDB2;LDB2	protein_coding;protein_coding;protein_coding;protein_coding;protein_coding;protein_coding;protein_coding;protein_coding;protein_coding;protein_coding;protein_coding	ENST00000304523.8;ENST00000441778.5;ENST00000502640.4;ENST00000504189.1;ENST00000506732.1;ENST00000508804.4;ENST00000508918.4;ENST00000510825.4;ENST00000512345.4;ENST00000513457.4;ENST00000515064.4	139604;139389;139429;139173;139455;170;139429;139473;139416;67355;139357	CGI:chr4:16360793-16361143	.
cg22917314	0.394466	0.742912	-0.348446	3.82672e-17	1.35152e-19	chr8	1186982	1186983	CTD-2281E23.2	processed_transcript	ENST00000520524.4	82099	CGI:chr8:1187207-1188672	N_Shore
cg02079551	0.526333	0.874761	-0.348428	2.83555e-13	3.39587e-16	chr10	105263619	105263620	SORCS3;SORCS3	protein_coding;protein_coding	ENST00000369699.7;ENST00000369701.6	622290;622517	CGI:chr10:104639809-104643054	.
cg22338152	0.410926	0.75932	-0.348394	4.46804e-18	2.07816e-20	chr19	57130775	57130776	USP29;USP29	protein_coding;protein_coding	ENST00000254181.7;ENST00000598197.1	10731;2131	CGI:chr19:57118971-57119265	.
cg13480465	0.362536	0.710885	-0.348349	1.28988e-22	2.5651e-24	chr4	16794134	16794135	LDB2;LDB2;LDB2;LDB2;LDB2;LDB2;LDB2;LDB2;LDB2;LDB2	protein_coding;protein_coding;protein_coding;protein_coding;protein_coding;protein_coding;protein_coding;protein_coding;protein_coding;protein_coding	ENST00000304523.8;ENST00000441778.5;ENST00000502640.4;ENST00000504189.1;ENST00000506732.1;ENST00000508918.4;ENST00000510825.4;ENST00000512345.4;ENST00000513457.4;ENST00000515064.4	104676;104461;104501;104245;104527;104501;104545;104488;32427;104429	CGI:chr4:16360793-16361143	.
cg18498565	0.521578	0.869774	-0.348195	1.59529e-13	2.04893e-16	chr10	3131412	3131413	PFKP;PFKP;PFKP	protein_coding;protein_coding;protein_coding	ENST00000381072.4;ENST00000381075.5;ENST00000381125.7	2404;62784;63891	CGI:chr10:3137982-3138386	.
cg14491776	0.568338	0.916359	-0.348021	4.03175e-09	1.78046e-12	*	-1	-1	.	.	.	.	.	.
cg00926657	0.453988	0.801987	-0.347999	2.29912e-09	1.06723e-12	chr17	81922946	81922947	MAFG;MAFG;MAFG;RP11-498C9.12	protein_coding;protein_coding;protein_coding;antisense	ENST00000357736.7;ENST00000392366.6;ENST00000574686.1;ENST00000580897.1	4769;587;4763;46	CGI:chr17:81922573-81922996	Island
cg21560697	0.477624	0.825608	-0.347984	8.17637e-13	8.72213e-16	chr2	9914754	9914755	TAF1B;TAF1B	protein_coding;protein_coding	ENST00000263663.8;ENST00000434858.4	71399;71228	CGI:chr2:9950778-9952327	.
cg07865418	0.374032	0.721854	-0.347822	3.5905e-17	1.27877e-19	chr5	6411295	6411296	.	.	.	.	CGI:chr5:6378178-6378733	.
cg02484411	0.422137	0.769822	-0.347684	1.42488e-13	1.85152e-16	chr2	493514	493515	AC093326.1	lincRNA	ENST00000427398.1	-858	CGI:chr2:495193-495834	N_Shore
cg05218696	0.470361	0.817939	-0.347578	1.01409e-10	6.37581e-14	chr14	100936157	100936158	SNHG23;SNORD113-4	lincRNA;snoRNA	ENST00000556720.4;ENST00000364802.1	-1245;-335	CGI:chr14:100883035-100883523	.
cg11691504	0.41004	0.757522	-0.347482	8.6208e-18	3.67513e-20	chr8	1500584	1500585	DLGAP2;DLGAP2	protein_coding;protein_coding	ENST00000421627.5;ENST00000612087.1	-783;-783	CGI:chr8:1495701-1495920	.
cg07699978	0.477413	0.824645	-0.347233	1.79602e-16	5.18225e-19	chr12	62800221	62800222	PPM1H	protein_coding	ENST00000228705.6	134817	CGI:chr12:62801877-62802129	N_Shore
cg14181111	0.457452	0.80464	-0.347188	7.20745e-10	3.72808e-13	chr1	168804075	168804076	.	.	.	.	CGI:chr1:169105528-169107173	.
cg17187764	0.438133	0.785102	-0.34697	3.33575e-18	1.60263e-20	chr12	7666058	7666059	APOBEC1;APOBEC1	protein_coding;protein_coding	ENST00000229304.4;ENST00000467171.2	-164;-154	CGI:chr12:7628407-7628652	.
cg22475859	0.45914	0.806107	-0.346968	3.65819e-17	1.2992e-19	chr2	365090	365091	.	.	.	.	CGI:chr2:314828-315170	.
cg04227892	0.393364	0.740331	-0.346967	6.00499e-11	3.99306e-14	chr5	2169288	2169289	.	.	.	.	CGI:chr5:2180137-2180353	.
cg11838237	0.258142	0.605044	-0.346901	5.5668e-24	1.81245e-25	chr5	1752749	1752750	.	.	.	.	CGI:chr5:1746254-1746935	.
cg07189394	0.484972	0.83186	-0.346888	1.18709e-13	1.57798e-16	chr3	132083671	132083672	CPNE4	protein_coding	ENST00000512055.4	201740	CGI:chr3:132035036-132035295	.
cg23332689	0.586496	0.933373	-0.346877	5.84781e-10	3.08406e-13	chr4	993864	993865	IDUA;IDUA;IDUA;IDUA;IDUA;IDUA;IDUA;IDUA;SLC26A1;SLC26A1;SLC26A1;SLC26A1	protein_coding;protein_coding;protein_coding;protein_coding;protein_coding;protein_coding;protein_coding;protein_coding;protein_coding;protein_coding;protein_coding;protein_coding	ENST00000247933.7;ENST00000502910.4;ENST00000504568.4;ENST00000506561.4;ENST00000508168.4;ENST00000509948.4;ENST00000514192.4;ENST00000514698.4;ENST00000361661.5;ENST00000398516.2;ENST00000398520.5;ENST00000622731.3	6866;6819;6776;6787;6797;1991;2038;6819;-427;-423;-487;-423	CGI:chr4:991138-991907	S_Shore
cg21789085	0.407096	0.753942	-0.346846	2.45051e-13	2.98375e-16	chr8	2076514	2076515	MIR7160;MYOM2;MYOM2	miRNA;protein_coding;protein_coding	ENST00000619295.1;ENST00000262113.7;ENST00000523438.1	-76;31473;31444	CGI:chr8:2085456-2085709	.
cg14353278	0.517555	0.864392	-0.346838	7.02639e-12	5.8918e-15	chr2	21006359	21006360	APOB;APOB	protein_coding;protein_coding	ENST00000233242.4;ENST00000616098.3	37715;37587	CGI:chr2:21043797-21044089	.
cg18032812	0.348603	0.695356	-0.346753	2.0782e-22	3.76876e-24	chr7	56883640	56883641	RP13-580B18.1	transcribed_unprocessed_pseudogene	ENST00000448242.1	-1493	CGI:chr7:56882171-56882629	S_Shore
cg05513274	0.41586	0.762551	-0.346691	1.00138e-14	1.77012e-17	chr12	113774954	113774955	LINC01234;LINC01234;LINC01234;LINC01234	lincRNA;lincRNA;lincRNA;lincRNA	ENST00000510694.2;ENST00000547963.1;ENST00000550223.4;ENST00000550905.4	-1314;-1270;-1290;-1272	CGI:chr12:113591513-113591947	.
cg25516542	0.456114	0.802789	-0.346675	4.34366e-14	6.48169e-17	chr5	2141659	2141660	.	.	.	.	CGI:chr5:2136683-2137191	.
cg26188212	0.25247	0.599116	-0.346646	5.88074e-22	9.06715e-24	chr1	228831377	228831378	.	.	.	.	CGI:chr1:228754995-228755204	.
cg02638348	0.449172	0.795713	-0.346541	2.44227e-11	1.78169e-14	chr10	132878663	132878664	CFAP46	protein_coding	ENST00000368586.8	63923	CGI:chr10:132879347-132879748	N_Shore
cg08453903	0.402519	0.749038	-0.346519	3.48522e-12	3.14551e-15	chr17	73692048	73692049	.	.	.	.	CGI:chr17:73642889-73645531	.
cg13567205	0.509321	0.855816	-0.346495	3.46941e-13	4.07208e-16	chr9	134835492	134835493	COL5A1;COL5A1	protein_coding;protein_coding	ENST00000371817.6;ENST00000618395.3	193717;193686	CGI:chr9:134839040-134839356	N_Shelf
cg07072463	0.453242	0.799679	-0.346437	7.3942e-18	3.21088e-20	chr5	180620184	180620185	FLT4;FLT4;FLT4;FLT4;FLT4;FLT4;FLT4	protein_coding;protein_coding;protein_coding;protein_coding;protein_coding;protein_coding;protein_coding	ENST00000261937.9;ENST00000393347.6;ENST00000502649.4;ENST00000507059.4;ENST00000512795.1;ENST00000514810.1;ENST00000619105.3	29441;29441;29417;9155;-814;-1046;29441	CGI:chr5:180618789-180621897	Island
cg02774282	0.428813	0.775207	-0.346394	2.74521e-17	1.01139e-19	chr6	109294216	109294217	CCDC162P;CCDC162P;CCDC162P;CCDC162P;CCDC162P	unitary_pseudogene;unitary_pseudogene;unitary_pseudogene;unitary_pseudogene;unitary_pseudogene	ENST00000368966.7;ENST00000422819.4;ENST00000429614.4;ENST00000514758.4;ENST00000615766.3	-94;-88;-88;3187;8730	CGI:chr6:109290788-109291027	S_Shelf
cg21069434	0.371251	0.717621	-0.346369	9.90495e-18	4.14185e-20	chr2	2188300	2188301	MYT1L;MYT1L;MYT1L	protein_coding;protein_coding;protein_coding	ENST00000399161.5;ENST00000428368.5;ENST00000479156.1	142895;142817;136236	CGI:chr2:2189738-2189944	N_Shore
cg20410114	0.355686	0.702002	-0.346316	2.50975e-19	1.66999e-21	chr6	3160268	3160269	.	.	.	.	CGI:chr6:3157166-3158184	S_Shelf
cg10589396	0.579794	0.926079	-0.346284	2.86713e-08	1.08686e-11	chr10	131093078	131093079	TCERG1L;TCERG1L	protein_coding;protein_coding	ENST00000368642.4;ENST00000483040.1	218644;167259	CGI:chr10:131095165-131095425	N_Shelf
cg11680590	0.381522	0.727748	-0.346227	4.6377e-18	2.14283e-20	chr15	92158655	92158656	RP11-152L20.3;SLCO3A1;SLCO3A1;SLCO3A1;SLCO3A1;SLCO3A1;SLCO3A1	antisense;protein_coding;protein_coding;protein_coding;protein_coding;protein_coding;protein_coding	ENST00000561674.1;ENST00000318445.9;ENST00000424469.2;ENST00000555210.1;ENST00000555513.1;ENST00000555549.4;ENST00000555892.4	172383;304959;304798;32468;5091;60724;32470	CGI:chr15:92393447-92395291	.
cg04546186	0.422794	0.768876	-0.346081	1.83507e-17	7.10874e-20	chr16	86521544	86521545	RP11-463O9.9	lincRNA	ENST00000602739.1	2354	CGI:chr16:86515463-86516906	.
cg26531231	0.50246	0.848483	-0.346022	7.32797e-17	2.37261e-19	chr4	40334238	40334239	CHRNA9	protein_coding	ENST00000310169.2	-1092	CGI:chr4:40437804-40438888	.
cg14361526	0.419196	0.765188	-0.345992	1.98453e-12	1.90846e-15	chr14	101046395	101046396	MIR381HG;MIR487B;MIR539;MIR889	lincRNA;miRNA;miRNA;miRNA	ENST00000553692.1;ENST00000385021.2;ENST00000365690.3;ENST00000401280.2	1237;-41;-919;-1485	CGI:chr14:101065306-101066047	.
cg07474269	0.3912	0.737128	-0.345928	5.8991e-21	6.4545e-23	chr5	167295508	167295509	CTB-180C19.1;TENM2	antisense;protein_coding	ENST00000521697.1;ENST00000518659.4	-1234;10708	CGI:chr5:166978479-166978687	.
cg07473138	0.389208	0.735106	-0.345897	1.26461e-15	2.91193e-18	chr10	120454439	120454440	.	.	.	.	CGI:chr10:120456747-120457865	N_Shelf
cg24331722	0.466375	0.812226	-0.345851	7.50615e-14	1.04376e-16	chr8	61721069	61721070	.	.	.	.	CGI:chr8:61713997-61714952	.
cg08011645	0.501395	0.847224	-0.345829	8.31322e-11	5.33974e-14	chr11	64721229	64721230	NRXN2;NRXN2	protein_coding;protein_coding	ENST00000265459.9;ENST00000377559.6	1960;1960	CGI:chr11:64723134-64723674	N_Shore
cg11454300	0.462555	0.808176	-0.34562	5.85005e-11	3.9004e-14	chr2	2252630	2252631	MYT1L;MYT1L;MYT1L	protein_coding;protein_coding;protein_coding	ENST00000399161.5;ENST00000428368.5;ENST00000479156.1	78565;78487;71906	CGI:chr2:2189738-2189944	.
cg03290602	0.512742	0.858362	-0.34562	2.87633e-13	3.43941e-16	chr14	101047714	101047715	MIR381HG;MIR544A;MIR889	lincRNA;miRNA;miRNA	ENST00000553692.1;ENST00000384855.1;ENST00000401280.2	2556;-945;-166	CGI:chr14:101065306-101066047	.
cg19571360	0.575189	0.920807	-0.345617	2.49512e-11	1.81614e-14	chr14	105840694	105840695	IGHD;IGHD;IGHG1;IGHG1;IGHG1;IGHG1;IGHG1;IGHG1;IGHG3;IGHG3	IG_C_gene;IG_C_gene;IG_C_gene;IG_C_gene;IG_C_gene;IG_C_gene;IG_C_gene;IG_C_gene;IG_C_gene;IG_C_gene	ENST00000390556.5;ENST00000613640.1;ENST00000612473.1;ENST00000613152.3;ENST00000615822.3;ENST00000618145.3;ENST00000618756.3;ENST00000619212.3;ENST00000616127.1;ENST00000621473.3	4984;4985;164839;370765;221973;171683;697651;370778;197652;164883	CGI:chr14:105850536-105850823	.
cg09338302	0.523333	0.868933	-0.3456	4.13865e-15	8.17915e-18	chr7	1286121	1286122	.	.	.	.	CGI:chr7:1288889-1289393	N_Shelf
cg21367256	0.399003	0.744579	-0.345576	4.656e-19	2.87407e-21	chr20	64164305	64164306	MYT1;MYT1;MYT1;MYT1;MYT1	protein_coding;protein_coding;protein_coding;protein_coding;protein_coding	ENST00000328439.4;ENST00000360149.7;ENST00000536311.4;ENST00000610671.1;ENST00000622439.3	-170;12513;-170;-308;-170	CGI:chr20:64178517-64179018	.
cg03585053	0.520186	0.865695	-0.34551	1.58044e-11	1.20908e-14	chr2	239247332	239247333	HDAC4;HDAC4;HDAC4;HDAC4;HDAC4;HDAC4;HDAC4	protein_coding;protein_coding;protein_coding;protein_coding;protein_coding;protein_coding;protein_coding	ENST00000345617.6;ENST00000446876.1;ENST00000463007.4;ENST00000493582.4;ENST00000535493.4;ENST00000543185.4;ENST00000544989.1	153618;61881;51308;154323;51199;153618;153680	CGI:chr2:239231780-239232096	.
cg07267845	0.358982	0.704415	-0.345433	2.12301e-19	1.44845e-21	chr7	157552872	157552873	PTPRN2;PTPRN2;PTPRN2;PTPRN2	protein_coding;protein_coding;protein_coding;protein_coding	ENST00000389413.6;ENST00000389416.7;ENST00000389418.7;ENST00000409483.4	1034902;1034840;1034808;1034917	CGI:chr7:157553919-157554375	N_Shore
cg24134504	0.605501	0.950846	-0.345344	2.15365e-16	6.09606e-19	chr18	78879479	78879480	.	.	.	.	CGI:chr18:78879260-78879744	Island
cg14103446	0.343012	0.688333	-0.34532	1.17409e-22	2.35848e-24	chr5	33008804	33008805	CTD-2066L21.1;CTD-2066L21.3	lincRNA;lincRNA	ENST00000511054.1;ENST00000512323.1	-191;14524	CGI:chr5:32709804-32714344	.
cg20042662	0.29994	0.645159	-0.345219	1.11972e-14	1.95122e-17	chr8	142454219	142454220	BAI1;BAI1	protein_coding;protein_coding	ENST00000517894.4;ENST00000521208.4	4788;4539	CGI:chr8:142454123-142454531	Island
cg26819590	0.492378	0.837529	-0.345151	4.26803e-10	2.32355e-13	chr16	2055206	2055207	TSC2;TSC2;TSC2;TSC2;TSC2;TSC2;TSC2;TSC2;TSC2;TSC2	protein_coding;protein_coding;protein_coding;protein_coding;protein_coding;protein_coding;protein_coding;protein_coding;protein_coding;protein_coding	ENST00000219476.6;ENST00000350773.7;ENST00000382538.9;ENST00000401874.5;ENST00000432909.2;ENST00000439117.5;ENST00000439673.5;ENST00000467949.1;ENST00000568454.4;ENST00000568692.1	7740;7185;7225;7216;1772;7172;7191;-956;7003;909	CGI:chr16:2055013-2055389	Island
cg01149264	0.542996	0.8881	-0.345104	3.88842e-13	4.51392e-16	chr16	594081	594082	RAB40C;RAB40C;RAB40C;RAB40C;RAB40C;RAB40C;RAB40C;RAB40C;RAB40C;RAB40C	protein_coding;protein_coding;protein_coding;protein_coding;protein_coding;protein_coding;protein_coding;protein_coding;protein_coding;protein_coding	ENST00000248139.6;ENST00000509637.5;ENST00000535977.4;ENST00000538492.4;ENST00000539661.4;ENST00000563109.1;ENST00000565511.4;ENST00000566290.4;ENST00000568586.4;ENST00000569575.4	3991;3784;4723;4003;4411;3748;3838;4411;4012;4723	CGI:chr16:588545-590705	S_Shelf
cg14234656	0.411147	0.756059	-0.344912	2.58916e-14	4.0903e-17	chr7	157075947	157075948	.	.	.	.	CGI:chr7:157078360-157078603	N_Shelf
cg08411049	0.402621	0.747455	-0.344834	4.46769e-17	1.54362e-19	chr18	63477017	63477018	SERPINB5;SERPINB5;SERPINB5	protein_coding;protein_coding;protein_coding	ENST00000382771.7;ENST00000424602.1;ENST00000489441.4	255;-111;58	CGI:chr18:63422029-63423124	.
cg13386070	0.378389	0.723117	-0.344728	3.6778e-24	1.30323e-25	chr1	175077749	175077750	TNN;TNN;TNN	protein_coding;protein_coding;protein_coding	ENST00000239462.7;ENST00000621086.1;ENST00000622870.3	9890;329;359	CGI:chr1:175079414-175079738	N_Shore
cg00092383	0.575148	0.919836	-0.344688	4.27624e-11	2.94826e-14	chr7	157282513	157282514	RP5-1142J19.1	lincRNA	ENST00000442017.1	174	CGI:chr7:157279108-157280151	S_Shelf
cg19972648	0.358809	0.703416	-0.344607	2.32283e-23	5.76589e-25	chr10	77350874	77350875	KCNMA1;KCNMA1;KCNMA1;KCNMA1;KCNMA1;KCNMA1;KCNMA1;KCNMA1;KCNMA1;KCNMA1;KCNMA1;KCNMA1;KCNMA1;KCNMA1;KCNMA1	protein_coding;protein_coding;protein_coding;protein_coding;protein_coding;protein_coding;protein_coding;protein_coding;protein_coding;protein_coding;protein_coding;protein_coding;protein_coding;protein_coding;protein_coding	ENST00000286627.8;ENST00000286628.11;ENST00000354353.8;ENST00000372403.7;ENST00000372408.5;ENST00000372421.8;ENST00000372437.4;ENST00000372440.4;ENST00000372443.4;ENST00000404771.6;ENST00000404857.4;ENST00000406533.6;ENST00000457953.4;ENST00000604624.4;ENST00000626620.1	287722;286769;53152;286621;286580;286689;286574;287120;287496;286885;53152;53152;286691;53111;286935	CGI:chr10:77636337-77638737	.
cg08731543	0.438051	0.782657	-0.344606	1.43961e-16	4.27728e-19	chr21	30829773	30829774	KRTAP7-1	protein_coding	ENST00000621162.1	-13	CGI:chr21:31251828-31252066	.
cg05152432	0.418548	0.763131	-0.344584	2.39353e-12	2.25335e-15	chr1	1758448	1758449	NADK;NADK;NADK;NADK;NADK;NADK;NADK;NADK;NADK;NADK	protein_coding;protein_coding;protein_coding;protein_coding;protein_coding;protein_coding;protein_coding;protein_coding;protein_coding;protein_coding	ENST00000341426.8;ENST00000341991.6;ENST00000342348.8;ENST00000378625.4;ENST00000460602.4;ENST00000469045.4;ENST00000477235.4;ENST00000492768.4;ENST00000492845.5;ENST00000497186.4	20023;20343;128;21622;19972;-1179;-1423;19972;21515;-1219	CGI:chr1:1760328-1760624	N_Shore
cg27212428	0.398661	0.743223	-0.344562	2.75612e-18	1.36538e-20	chr4	22029936	22029937	RP11-17E2.2	antisense	ENST00000510705.3	80920	CGI:chr4:21948462-21949242	.
cg12635314	0.421388	0.765914	-0.344526	3.71442e-21	4.39948e-23	chr10	2772812	2772813	.	.	.	.	CGI:chr10:2772811-2773277	Island
cg09361748	0.304733	0.649123	-0.34439	2.28294e-26	1.71834e-27	chr7	72217321	72217322	CALN1;CALN1;CALN1;CALN1;CALN1	protein_coding;protein_coding;protein_coding;protein_coding;protein_coding	ENST00000329008.8;ENST00000395275.5;ENST00000395276.5;ENST00000431984.4;ENST00000446128.1	119675;195053;229741;229831;120431	CGI:chr7:72335772-72337783	.
cg21576003	0.359445	0.703823	-0.344378	1.61096e-12	1.58403e-15	chr5	6182255	6182256	.	.	.	.	CGI:chr5:6378178-6378733	.
cg20000220	0.554402	0.898741	-0.344339	1.44639e-12	1.44412e-15	chr8	143718827	143718828	MAPK15;MAPK15;MAPK15;MAPK15;MAPK15;RP11-429J17.5	protein_coding;protein_coding;protein_coding;protein_coding;protein_coding;antisense	ENST00000338033.7;ENST00000395107.7;ENST00000395108.2;ENST00000484654.1;ENST00000533830.1;ENST00000527908.1	2567;2448;2448;2486;-1366;65	CGI:chr8:143718787-143719165	Island
cg03872376	0.379325	0.723625	-0.3443	4.48074e-14	6.65504e-17	chr1	237890528	237890529	RP11-193H5.1;ZP4;ZP4	antisense;protein_coding;protein_coding	ENST00000450451.1;ENST00000366570.4;ENST00000611898.3	28352;267;395	CGI:chr1:237783887-237784148	.
cg21723707	0.466148	0.810391	-0.344243	1.10194e-14	1.92667e-17	chr8	1463646	1463647	.	.	.	.	CGI:chr8:1456718-1456928	.
cg22576976	0.310611	0.654794	-0.344183	7.0535e-20	5.54147e-22	chr19	56340767	56340768	AC006116.17;AC006116.17;ZSCAN5A	antisense;antisense;protein_coding	ENST00000587004.4;ENST00000587448.1;ENST00000587340.4	26063;25167;27617	CGI:chr19:56339288-56339852	S_Shore
cg13416517	0.493112	0.837122	-0.34401	1.54002e-14	2.58097e-17	chr2	620106	620107	.	.	.	.	CGI:chr2:620639-621993	N_Shore
cg24258712	0.543912	0.887912	-0.343999	5.72024e-08	2.06934e-11	chr8	143155108	143155109	.	.	.	.	CGI:chr8:143159441-143160696	.
cg13562266	0.375617	0.719559	-0.343942	4.85271e-20	3.98229e-22	chr8	1392185	1392186	.	.	.	.	CGI:chr8:1393054-1394000	N_Shore
cg05718034	0.568308	0.912208	-0.3439	2.63421e-10	1.50114e-13	chr1	7062607	7062608	CAMTA1	protein_coding	ENST00000303635.10	277282	CGI:chr1:7062459-7062667	Island
cg11362049	0.418504	0.762295	-0.34379	1.06037e-13	1.4255e-16	chr11	132101462	132101463	NTM;NTM;NTM;NTM;NTM;NTM;NTM	protein_coding;protein_coding;protein_coding;protein_coding;protein_coding;protein_coding;protein_coding	ENST00000374784.4;ENST00000374786.4;ENST00000374791.6;ENST00000425719.5;ENST00000479431.1;ENST00000498764.4;ENST00000550167.4	189993;190458;730983;189999;190020;191417;645998	CGI:chr11:131910458-131911638	.
cg20716202	0.432119	0.775731	-0.343612	8.32233e-24	2.48959e-25	chr11	2904617	2904618	SLC22A18;SLC22A18;SLC22A18;SLC22A18;SLC22A18;SLC22A18;SLC22A18AS;SLC22A18AS	protein_coding;protein_coding;protein_coding;protein_coding;protein_coding;protein_coding;antisense;antisense	ENST00000312221.8;ENST00000347936.5;ENST00000380574.4;ENST00000449793.5;ENST00000485423.1;ENST00000492567.2;ENST00000455942.3;ENST00000625099.2	2423;4895;2196;2333;1502;1240;-1126;-876	CGI:chr11:2902071-2902587	S_Shelf
cg03225787	0.326949	0.670403	-0.343454	2.80694e-18	1.38565e-20	chr1	158548573	158548574	OR6Y1	protein_coding	ENST00000302617.3	-467	CGI:chr1:158180830-158181713	.
cg11684549	0.378364	0.721817	-0.343453	8.58039e-18	3.66013e-20	chr17	81148443	81148444	AATK;AATK;AATK	protein_coding;protein_coding;protein_coding	ENST00000326724.7;ENST00000374792.5;ENST00000572798.1	17575;17630;17635	CGI:chr17:81158079-81158284	.
cg03900492	0.34457	0.688	-0.343429	1.82613e-16	5.25613e-19	chr7	157552965	157552966	PTPRN2;PTPRN2;PTPRN2;PTPRN2	protein_coding;protein_coding;protein_coding;protein_coding	ENST00000389413.6;ENST00000389416.7;ENST00000389418.7;ENST00000409483.4	1034809;1034747;1034715;1034824	CGI:chr7:157553919-157554375	N_Shore
cg09942424	0.482749	0.82613	-0.343381	3.34632e-11	2.36346e-14	chr17	76917337	76917338	MGAT5B;MGAT5B;MGAT5B;MGAT5B	protein_coding;protein_coding;protein_coding;protein_coding	ENST00000301618.7;ENST00000428789.5;ENST00000565043.4;ENST00000569840.5	48880;44689;44625;48880	CGI:chr17:76932628-76932840	.
cg18332838	0.405321	0.748683	-0.343362	7.47166e-17	2.41578e-19	chr8	125686494	125686495	.	.	.	.	CGI:chr8:125431990-125432198	.
cg00892792	0.571353	0.914693	-0.34334	5.14287e-09	2.22264e-12	chr8	141287485	141287486	RP11-10J21.5;SLC45A4;SLC45A4	lincRNA;protein_coding;protein_coding	ENST00000520606.1;ENST00000520137.1;ENST00000521804.1	9256;20821;20808	CGI:chr8:141285119-141285780	S_Shore
cg07144328	0.342213	0.685549	-0.343336	2.66038e-19	1.75144e-21	chr5	1854839	1854840	.	.	.	.	CGI:chr5:1856659-1858330	N_Shore
cg22673542	0.462832	0.806042	-0.34321	2.62045e-10	1.49411e-13	chr1	248594827	248594828	OR2T10	protein_coding	ENST00000330500.3	-1058	CGI:chr1:248691729-248692169	.
cg03749154	0.401688	0.744894	-0.343206	7.50876e-15	1.38247e-17	chr1	30682311	30682312	.	.	.	.	CGI:chr1:30718125-30719113	.
cg10154971	0.507116	0.850186	-0.34307	8.2583e-13	8.7988e-16	chr16	59236681	59236682	.	.	.	.	CGI:chr16:58733543-58734424	.
cg16929739	0.373245	0.716263	-0.343017	9.87626e-14	1.33618e-16	chr3	11136907	11136908	HRH1	protein_coding	ENST00000438284.2	-187	CGI:chr3:11154215-11154866	.
cg07369606	0.452234	0.795242	-0.343007	7.96474e-16	1.94533e-18	chr17	82332293	82332294	SECTM1;SECTM1;SECTM1;SECTM1;SECTM1;SECTM1;SECTM1	protein_coding;protein_coding;protein_coding;protein_coding;protein_coding;protein_coding;protein_coding	ENST00000269389.6;ENST00000580437.4;ENST00000581691.4;ENST00000581864.4;ENST00000582290.4;ENST00000582563.4;ENST00000583093.4	1706;1470;1782;1456;1474;1477;1471	CGI:chr17:82333144-82334518	N_Shore
cg01439568	0.520725	0.863672	-0.342947	1.92664e-10	1.13426e-13	chr3	51392488	51392489	RBM15B	protein_coding	ENST00000563281.1	1219	CGI:chr3:51390981-51392168	S_Shore
cg10767420	0.503009	0.845899	-0.342889	7.85267e-10	4.02554e-13	chr2	2577785	2577786	.	.	.	.	CGI:chr2:2650336-2650586	.
cg00736201	0.426479	0.769348	-0.342869	1.10887e-18	6.09209e-21	chr12	108249490	108249491	WSCD2;WSCD2;WSCD2	protein_coding;protein_coding;protein_coding	ENST00000332082.7;ENST00000547525.4;ENST00000549903.1	117738;120018;53656	CGI:chr12:108129184-108129696	.
cg24041118	0.451184	0.794041	-0.342857	1.55651e-15	3.49329e-18	chr5	1202334	1202335	SLC6A19;SLC6A19	protein_coding;protein_coding	ENST00000304460.10;ENST00000515652.4	738;738	CGI:chr5:1201328-1202023	S_Shore
cg14629571	0.510913	0.853768	-0.342855	1.02848e-12	1.06626e-15	chr9	117708304	117708305	RNU6-1082P;TLR4;TLR4;TLR4;TLR4	snRNA;protein_coding;protein_coding;protein_coding;protein_coding	ENST00000364574.1;ENST00000355622.6;ENST00000394487.4;ENST00000472304.1;ENST00000490685.1	-201;3931;3971;3914;106	CGI:chr9:117744949-117745364	.
cg03480068	0.487603	0.830357	-0.342754	2.6404e-15	5.53377e-18	chr10	1707353	1707354	ADARB2	protein_coding	ENST00000381312.4	30124	CGI:chr10:1699230-1701931	.
cg04553632	0.388139	0.730872	-0.342733	1.26503e-16	3.81526e-19	chr10	133115677	133115678	GPR123;GPR123;GPR123	protein_coding;protein_coding;protein_coding	ENST00000392606.2;ENST00000392607.6;ENST00000607359.4	13430;27771;44747	CGI:chr10:133112311-133113374	S_Shelf
cg17402103	0.411659	0.75438	-0.342721	1.0766e-17	4.46722e-20	chr10	2225056	2225057	.	.	.	.	CGI:chr10:2315054-2315277	.
cg16003156	0.566657	0.909207	-0.34255	9.81967e-13	1.02258e-15	chr17	73584494	73584495	SDK2	protein_coding	ENST00000392650.6	59596	CGI:chr17:73642889-73645531	.
cg04276626	0.202767	0.545295	-0.342528	2.34529e-27	2.83052e-28	chr17	59841139	59841140	MIR21;VMP1	miRNA;protein_coding	ENST00000362134.1;ENST00000592790.1	-128;3207	CGI:chr17:59892681-59893660	.
cg26986989	0.314091	0.656494	-0.342403	6.14219e-15	1.15548e-17	chr5	2338884	2338885	.	.	.	.	CGI:chr5:2180137-2180353	.
cg07563611	0.526802	0.869192	-0.34239	3.01739e-11	2.15484e-14	chr16	70760953	70760954	VAC14;VAC14;VAC14;VAC14;VAC14-AS1;VAC14-AS1	protein_coding;protein_coding;protein_coding;protein_coding;antisense;antisense	ENST00000261776.8;ENST00000563662.2;ENST00000568548.4;ENST00000568886.4;ENST00000398177.1;ENST00000562507.4	40209;1939;40208;40030;5819;5854	CGI:chr16:70762502-70762725	N_Shore
cg20543651	0.287699	0.630052	-0.342352	4.84337e-22	7.61878e-24	chr8	55005835	55005836	.	.	.	.	CGI:chr8:55101096-55103124	.
cg08321048	0.605203	0.947493	-0.34229	4.00867e-08	1.48375e-11	chr10	132138459	132138460	JAKMIP3	protein_coding	ENST00000298622.7	33787	CGI:chr10:132138194-132138508	Island
cg20749462	0.526195	0.8683	-0.342104	6.9647e-15	1.29181e-17	chr8	1416523	1416524	.	.	.	.	CGI:chr8:1417008-1417337	N_Shore
cg13615402	0.427086	0.76913	-0.342044	6.30226e-17	2.08783e-19	chr15	25224439	25224440	SNHG14;SNORD115-30	processed_transcript;snoRNA	ENST00000453082.4;ENST00000364117.1	6086;-765	CGI:chr15:25438248-25439268	.
cg23913077	0.416198	0.758147	-0.341949	5.56449e-18	2.51624e-20	chr10	109258689	109258690	.	.	.	.	CGI:chr10:109456846-109457325	.
cg10919344	0.348225	0.690034	-0.341809	9.43048e-21	9.55331e-23	chr11	59443161	59443162	OR5A1	protein_coding	ENST00000302030.2	16	CGI:chr11:59560664-59561034	.
cg22952849	0.548205	0.889929	-0.341724	9.2807e-12	7.53216e-15	chr10	129867632	129867633	EBF3;EBF3	protein_coding;protein_coding	ENST00000355311.8;ENST00000368648.6	96210;96210	CGI:chr10:129867752-129868051	N_Shore
cg02603518	0.511705	0.853416	-0.341711	3.42323e-11	2.41242e-14	chr20	63086587	63086588	.	.	.	.	CGI:chr20:63086415-63086654	Island
cg19575753	0.441392	0.783089	-0.341698	1.59663e-13	2.04997e-16	chr5	1948881	1948882	RP11-259O2.1;RP11-259O2.1	lincRNA;lincRNA	ENST00000511693.1;ENST00000513419.1	15017;9108	CGI:chr5:1948880-1949113	Island
cg15318662	0.572913	0.914604	-0.341692	1.14923e-12	1.17543e-15	chr6	31775998	31775999	VWA7;VWA7	protein_coding;protein_coding	ENST00000375688.4;ENST00000467576.1	1297;1275	CGI:chr6:31795463-31796128	.
cg19495428	0.493239	0.834917	-0.341679	1.70437e-13	2.1708e-16	chr10	133309563	133309564	PRAP1;TUBGCP2;TUBGCP2;TUBGCP2;TUBGCP2;TUBGCP2;TUBGCP2;TUBGCP2;ZNF511;ZNF511;ZNF511;ZNF511	protein_coding;protein_coding;protein_coding;protein_coding;protein_coding;protein_coding;protein_coding;protein_coding;protein_coding;protein_coding;protein_coding;protein_coding	ENST00000368554.7;ENST00000368563.5;ENST00000417178.5;ENST00000470829.1;ENST00000480198.1;ENST00000482278.4;ENST00000487796.2;ENST00000543663.4;ENST00000359035.4;ENST00000361518.8;ENST00000463816.2;ENST00000482153.1	152;-406;-406;-428;-714;2775;-702;-406;621;1087;122;613	CGI:chr10:133308487-133309605	Island
cg06201717	0.457645	0.799316	-0.341671	9.77211e-15	1.73616e-17	chr1	3033069	3033070	.	.	.	.	CGI:chr1:3022069-3022479	.
cg07677157	0.283322	0.624991	-0.34167	3.12005e-14	4.83515e-17	chr12	65657148	65657149	RP11-221N13.4	lincRNA	ENST00000540875.1	12813	CGI:chr12:65729008-65729548	.
cg26150142	0.496941	0.8386	-0.341659	4.11219e-11	2.84384e-14	chr1	247939540	247939541	OR2L13;OR2X1P	protein_coding;unprocessed_pseudogene	ENST00000366478.2;ENST00000421144.2	2348;566	CGI:chr1:247937023-247937424	S_Shelf
cg22457668	0.562848	0.904494	-0.341646	4.95868e-09	2.14861e-12	chr8	1369886	1369887	AF067845.1	lincRNA	ENST00000567210.1	-52	CGI:chr8:1373066-1373472	N_Shelf
cg24150662	0.497717	0.839351	-0.341635	8.50046e-17	2.70224e-19	chr1	3033109	3033110	.	.	.	.	CGI:chr1:3022069-3022479	.
cg16201883	0.578266	0.91981	-0.341544	3.61305e-09	1.6102e-12	chr17	81528927	81528928	FSCN2;FSCN2	protein_coding;protein_coding	ENST00000334850.7;ENST00000417245.5	394;530	CGI:chr17:81527979-81529265	Island
cg04876905	0.485251	0.826732	-0.341481	7.93029e-13	8.50108e-16	chr12	95317734	95317735	.	.	.	.	CGI:chr12:95217058-95218221	.
cg14788768	0.591925	0.933365	-0.34144	1.09946e-09	5.46956e-13	chr5	24170177	24170178	C5orf17;CTD-2015B23.2	lincRNA;processed_pseudogene	ENST00000512559.4;ENST00000514047.1	218828;-194	CGI:chr5:25190394-25191004	.
cg11950860	0.28532	0.626715	-0.341395	2.91178e-17	1.06214e-19	chr1	152757755	152757756	LCE1B	protein_coding	ENST00000615904.1	20236	CGI:chr1:152515581-152515794	.
cg11595635	0.520736	0.862131	-0.341394	1.47945e-13	1.91461e-16	chr5	2634049	2634050	.	.	.	.	CGI:chr5:2642991-2643195	.
cg15444478	0.399668	0.740961	-0.341293	6.96795e-15	1.29207e-17	chr12	130010152	130010153	.	.	.	.	CGI:chr12:129903064-129904230	.
cg12618806	0.380262	0.721522	-0.341259	3.67753e-12	3.30713e-15	chr8	1501331	1501332	DLGAP2;DLGAP2	protein_coding;protein_coding	ENST00000421627.5;ENST00000612087.1	-36;-36	CGI:chr8:1495701-1495920	.
cg14656153	0.393555	0.734784	-0.341229	1.37852e-19	9.95835e-22	chr6	37538194	37538195	.	.	.	.	CGI:chr6:37535762-37536515	S_Shore
cg16538749	0.52879	0.869987	-0.341197	3.03338e-14	4.71231e-17	chr8	1104487	1104488	CTD-2281E23.2;ERICH1-AS1;ERICH1-AS1	processed_transcript;antisense;antisense	ENST00000520524.4;ENST00000522092.4;ENST00000578889.1	-396;366835;221158	CGI:chr8:1103354-1103804	S_Shore
cg11388802	0.457503	0.798665	-0.341162	7.73152e-13	8.30963e-16	chr1	181608711	181608712	CACNA1E;CACNA1E;CACNA1E;CACNA1E;CACNA1E;CACNA1E;CACNA1E;CACNA1E;CACNA1E;CACNA1E	protein_coding;protein_coding;protein_coding;protein_coding;protein_coding;protein_coding;protein_coding;protein_coding;protein_coding;protein_coding	ENST00000357570.8;ENST00000358338.7;ENST00000360108.6;ENST00000367567.7;ENST00000367570.4;ENST00000367573.5;ENST00000524607.4;ENST00000533229.1;ENST00000621551.2;ENST00000621791.3	124965;124965;124972;124965;125130;124965;195608;125399;124965;125130	CGI:chr1:181485838-181486125	.
cg25730098	0.48559	0.826597	-0.341006	6.30041e-13	6.92135e-16	chr19	55835262	55835263	NLRP11;NLRP11;NLRP11;NLRP4	protein_coding;protein_coding;protein_coding;protein_coding	ENST00000590409.4;ENST00000593208.1;ENST00000593244.4;ENST00000301295.9	1501;1539;1178;-1317	CGI:chr19:55849816-55851740	.
cg01343097	0.487892	0.828844	-0.340952	6.54489e-12	5.53446e-15	chr1	248121669	248121670	OR2M1P	unprocessed_pseudogene	ENST00000318104.2	-264	CGI:chr1:247937023-247937424	.
cg05921260	0.39944	0.740303	-0.340864	1.56011e-17	6.16993e-20	chr6	28517138	28517139	GPX6;GPX6;GPX6;GPX6	protein_coding;protein_coding;protein_coding;protein_coding	ENST00000361902.4;ENST00000474923.1;ENST00000483058.1;ENST00000612264.3	-1344;-1350;11078;-1344	CGI:chr6:28587086-28587347	.
cg10833551	0.388151	0.729012	-0.340861	1.09981e-16	3.37957e-19	chr11	30627970	30627971	RP5-1024C24.1	antisense	ENST00000531002.1	43839	CGI:chr11:30585208-30586581	.
cg07569562	0.517795	0.858618	-0.340823	1.45137e-11	1.11988e-14	chr2	129586312	129586313	.	.	.	.	CGI:chr2:129587470-129587783	N_Shore
cg26221111	0.454471	0.795272	-0.340801	1.0847e-13	1.4543e-16	chr5	10310647	10310648	.	.	.	.	CGI:chr5:10307408-10307801	S_Shelf
cg13892386	0.464339	0.804925	-0.340585	7.07548e-18	3.094e-20	chr9	117745844	117745845	.	.	.	.	CGI:chr9:117744949-117745364	S_Shore
cg17654419	0.430912	0.771496	-0.340584	1.33744e-17	5.3836e-20	chr2	101396442	101396443	.	.	.	.	CGI:chr2:101386815-101387725	.
cg02955989	0.423645	0.764106	-0.340461	4.36964e-18	2.04053e-20	chr19	30453599	30453600	ZNF536;ZNF536	protein_coding;protein_coding	ENST00000355537.3;ENST00000585628.4	81186;225084	CGI:chr19:30450946-30451274	S_Shelf
cg13840239	0.415048	0.755483	-0.340434	1.69967e-15	3.78065e-18	chr9	86603477	86603478	.	.	.	.	CGI:chr9:86354092-86354989	.
cg00768487	0.178748	0.519179	-0.340431	3.60552e-15	7.27758e-18	chr1	26284820	26284821	UBXN11;UBXN11;UBXN11;UBXN11;UBXN11;UBXN11;UBXN11;UBXN11;UBXN11;UBXN11	protein_coding;protein_coding;protein_coding;protein_coding;protein_coding;protein_coding;protein_coding;protein_coding;protein_coding;protein_coding	ENST00000314675.10;ENST00000357089.7;ENST00000374217.5;ENST00000374221.6;ENST00000374222.4;ENST00000374223.4;ENST00000472155.4;ENST00000475591.4;ENST00000494942.4;ENST00000496466.1	21817;21813;33446;21826;33544;21801;21821;21817;21814;13207	CGI:chr1:26279871-26280422	.
cg15804426	0.61126	0.951659	-0.340399	9.25333e-09	3.81378e-12	chr19	38502894	38502895	RYR1;RYR1;RYR1;RYR1	protein_coding;protein_coding;protein_coding;protein_coding	ENST00000355481.7;ENST00000359596.6;ENST00000360985.6;ENST00000594335.4	69194;69063;69170;6678	CGI:chr19:38502523-38502735	S_Shore
cg00175487	0.39283	0.733208	-0.340378	5.63052e-14	8.10813e-17	chr14	101023849	101023850	AL132709.2;MIR299	miRNA;miRNA	ENST00000362112.3;ENST00000385016.3	-1152;68	CGI:chr14:101065306-101066047	.
cg25936482	0.510826	0.851203	-0.340377	5.56127e-14	8.01501e-17	chr5	15928577	15928578	FBXL7;FBXL7;FBXL7	protein_coding;protein_coding;protein_coding	ENST00000329673.8;ENST00000504595.1;ENST00000510662.1	688;428380;427138	CGI:chr5:15927979-15928409	S_Shore
cg09904358	0.481226	0.821559	-0.340333	2.18515e-15	4.69492e-18	chr10	24157982	24157983	KIAA1217;RP11-183E9.2	protein_coding;processed_pseudogene	ENST00000376462.4;ENST00000422734.1	463235;146	CGI:chr10:23694437-23696049	.
cg14032261	0.337297	0.67757	-0.340274	1.28047e-16	3.85021e-19	chr1	211735963	211735964	.	.	.	.	CGI:chr1:211675299-211675834	.
cg08844913	0.495474	0.835718	-0.340244	2.03532e-11	1.51373e-14	chr1	177755521	177755522	.	.	.	.	CGI:chr1:178037695-178038149	.
cg07052524	0.456579	0.796804	-0.340226	8.63005e-11	5.52197e-14	chr19	39519195	39519196	SELV;SELV;SELV;SELV	protein_coding;protein_coding;protein_coding;protein_coding	ENST00000335426.7;ENST00000423711.3;ENST00000600586.1;ENST00000622070.2	4081;4081;3380;4081	CGI:chr19:39515008-39515986	S_Shelf
cg27269149	0.410206	0.750416	-0.340209	7.22165e-18	3.14963e-20	chr8	1180775	1180776	CTD-2281E23.2	processed_transcript	ENST00000520524.4	75892	CGI:chr8:1182761-1182983	N_Shore
cg23257105	0.496629	0.836824	-0.340194	1.58447e-10	9.5196e-14	chr11	45649465	45649466	CHST1;CHST1	protein_coding;protein_coding	ENST00000308064.5;ENST00000533673.1	16158;170	CGI:chr11:45649647-45650862	N_Shore
cg03627350	0.590065	0.930252	-0.340187	1.68776e-11	1.2818e-14	chr10	132880921	132880922	CFAP46	protein_coding	ENST00000368586.8	61665	CGI:chr10:132879347-132879748	S_Shore
cg12593431	0.490183	0.830369	-0.340186	1.22978e-12	1.24905e-15	chr13	111588407	111588408	RP11-65D24.2;RP11-65D24.2	lincRNA;lincRNA	ENST00000375713.1;ENST00000607406.1	115;205	CGI:chr13:111586325-111586546	S_Shore
cg15997393	0.503786	0.843832	-0.340045	3.21296e-08	1.20872e-11	chr7	1922233	1922234	MAD1L1;MAD1L1;MAD1L1;MAD1L1;MAD1L1;MAD1L1	protein_coding;protein_coding;protein_coding;protein_coding;protein_coding;protein_coding	ENST00000265854.10;ENST00000399654.5;ENST00000402746.4;ENST00000406869.4;ENST00000437877.1;ENST00000450235.4	308186;310742;310713;311011;18317;58559	CGI:chr7:1928028-1928358	.
cg15193614	0.441836	0.781856	-0.34002	3.42102e-16	9.19039e-19	chr5	2239363	2239364	.	.	.	.	CGI:chr5:2180137-2180353	.
cg08827700	0.470461	0.810452	-0.339992	6.1149e-21	6.6318e-23	chr11	2904739	2904740	SLC22A18;SLC22A18;SLC22A18;SLC22A18;SLC22A18;SLC22A18;SLC22A18AS;SLC22A18AS	protein_coding;protein_coding;protein_coding;protein_coding;protein_coding;protein_coding;antisense;antisense	ENST00000312221.8;ENST00000347936.5;ENST00000380574.4;ENST00000449793.5;ENST00000485423.1;ENST00000492567.2;ENST00000455942.3;ENST00000625099.2	2545;5017;2318;2455;1624;1362;-1248;-998	CGI:chr11:2902071-2902587	S_Shelf
cg17473656	0.433495	0.773453	-0.339958	2.16061e-15	4.6479e-18	chr4	189365790	189365791	.	.	.	.	CGI:chr4:189363823-189364380	S_Shore
cg12928346	0.468459	0.80841	-0.33995	1.57428e-19	1.1222e-21	chr15	96778621	96778622	SPATA8-AS1;SPATA8-AS1	antisense;antisense	ENST00000558722.1;ENST00000560888.4	4692;3034	CGI:chr15:96416111-96417301	.
cg27137084	0.390574	0.730444	-0.33987	1.27357e-17	5.15914e-20	chr12	128550803	128550804	TMEM132C	protein_coding	ENST00000435159.2	283399	CGI:chr12:128415268-128415520	.
cg18360873	0.417645	0.757463	-0.339818	2.74947e-19	1.8004e-21	chr10	131253406	131253407	TCERG1L;TCERG1L	protein_coding;protein_coding	ENST00000368642.4;ENST00000483040.1	58316;6931	CGI:chr10:131260075-131260346	.
cg12986110	0.383274	0.723089	-0.339815	1.14694e-17	4.71714e-20	chr19	48048247	48048248	PLA2G4C;PLA2G4C;PLA2G4C	protein_coding;protein_coding;protein_coding	ENST00000354276.6;ENST00000594790.1;ENST00000599111.4	62536;6813;62571	CGI:chr19:48061812-48062067	.
cg10421718	0.502388	0.84214	-0.339752	1.37763e-11	1.06829e-14	chr13	112252397	112252398	.	.	.	.	CGI:chr13:112241113-112241394	.
cg20970886	0.445277	0.78502	-0.339743	3.31817e-13	3.9136e-16	chr3	192850925	192850926	MB21D2	protein_coding	ENST00000392452.2	67237	CGI:chr3:192916520-192918178	.
cg25499121	0.486079	0.825813	-0.339734	1.25417e-14	2.16068e-17	chr17	51929670	51929671	CA10;CA10;CA10;CA10;CA10;CA10	protein_coding;protein_coding;protein_coding;protein_coding;protein_coding;protein_coding	ENST00000285273.7;ENST00000442502.5;ENST00000451037.5;ENST00000570565.4;ENST00000571371.4;ENST00000575181.1	230132;230348;229058;230333;228394;230314	CGI:chr17:52157815-52158874	.
cg00929345	0.381982	0.721535	-0.339554	7.62048e-14	1.05819e-16	chr8	142540992	142540993	BAI1;BAI1;BAI1	protein_coding;protein_coding;protein_coding	ENST00000323289.6;ENST00000517894.4;ENST00000521208.4	76975;91561;91312	CGI:chr8:142541914-142542621	N_Shore
cg01881590	0.495002	0.834516	-0.339513	1.84287e-11	1.38443e-14	chr5	5302106	5302107	ADAMTS16;ADAMTS16	protein_coding;protein_coding	ENST00000274181.7;ENST00000433402.2	161775;161637	CGI:chr5:5303150-5303376	N_Shore
cg02764897	0.402061	0.741565	-0.339503	1.73646e-20	1.63157e-22	chr21	30395993	30395994	KRTAP13-1;KRTAP13-2	protein_coding;protein_coding	ENST00000355459.3;ENST00000613611.1	-82;29920	CGI:chr21:29939068-29939788	.
cg06880420	0.244298	0.583767	-0.339469	3.52188e-24	1.26426e-25	chr1	200150859	200150860	NR5A2;NR5A2;NR5A2	protein_coding;protein_coding;protein_coding	ENST00000236914.6;ENST00000367362.6;ENST00000544748.4	123244;123256;108033	CGI:chr1:200147568-200148076	S_Shelf
cg22177308	0.296154	0.635621	-0.339467	1.30717e-15	2.9981e-18	chr17	65628580	65628581	CTD-2535L24.2	protein_coding	ENST00000577662.1	12454	CGI:chr17:65559784-65561813	.
cg26286365	0.44036	0.779821	-0.339461	1.26608e-19	9.21264e-22	chr14	104182010	104182011	.	.	.	.	CGI:chr14:104179620-104180141	S_Shore
cg05600609	0.330207	0.66966	-0.339453	9.1895e-20	6.93173e-22	chr5	167888785	167888786	TENM2;TENM2;TENM2;TENM2;TENM2;TENM2;TENM2	protein_coding;protein_coding;protein_coding;protein_coding;protein_coding;protein_coding;protein_coding	ENST00000403607.2;ENST00000517586.1;ENST00000518659.4;ENST00000519204.4;ENST00000520393.4;ENST00000520394.4;ENST00000545108.4	12799;67716;603985;133848;314810;133781;12799	CGI:chr5:167858534-167858862	.
cg04221650	0.364738	0.704178	-0.33944	1.95998e-13	2.4526e-16	chr1	152709411	152709412	LCE4A;LCE4A	protein_coding;protein_coding	ENST00000335535.3;ENST00000368777.1	363;1250	CGI:chr1:152515581-152515794	.
cg09981464	0.438056	0.777435	-0.339379	7.64378e-13	8.2267e-16	chr16	87408053	87408054	ZCCHC14;ZCCHC14	protein_coding;protein_coding	ENST00000268616.7;ENST00000568020.4	83993;83807	CGI:chr16:87407781-87408065	Island
cg27009439	0.43284	0.772121	-0.339281	7.64754e-17	2.46695e-19	chr10	129344616	129344617	.	.	.	.	CGI:chr10:129466684-129467446	.
cg26995656	0.48083	0.819999	-0.339169	1.07461e-11	8.55873e-15	chr14	87655300	87655301	CTD-2007A10.1	lincRNA	ENST00000557784.1	-5	CGI:chr14:87992552-87993345	.
cg12046677	0.459007	0.798172	-0.339165	1.24038e-15	2.86273e-18	chr12	2251497	2251498	CACNA1C;CACNA1C;CACNA1C;CACNA1C;CACNA1C;CACNA1C;CACNA1C;CACNA1C;CACNA1C;CACNA1C;CACNA1C;CACNA1C;CACNA1C;CACNA1C;CACNA1C;CACNA1C;CACNA1C;CACNA1C;CACNA1C;CACNA1C;CACNA1C;CACNA1C;CACNA1C	protein_coding;protein_coding;protein_coding;protein_coding;protein_coding;protein_coding;protein_coding;protein_coding;protein_coding;protein_coding;protein_coding;protein_coding;protein_coding;protein_coding;protein_coding;protein_coding;protein_coding;protein_coding;protein_coding;protein_coding;protein_coding;protein_coding;protein_coding	ENST00000327702.10;ENST00000335762.8;ENST00000344100.6;ENST00000347598.7;ENST00000399591.4;ENST00000399595.4;ENST00000399597.4;ENST00000399601.4;ENST00000399603.4;ENST00000399606.4;ENST00000399617.4;ENST00000399621.4;ENST00000399629.4;ENST00000399634.4;ENST00000399637.4;ENST00000399638.4;ENST00000399641.4;ENST00000399644.4;ENST00000399649.4;ENST00000399655.4;ENST00000402845.6;ENST00000406454.6;EN…	197933;198198;197933;197933;197933;197933;197933;197933;197933;197933;197933;197933;197933;197933;197933;197933;197933;197933;197933;198198;197933;197933;197958	CGI:chr12:2229996-2230449	.
cg05024715	0.480279	0.81943	-0.33915	1.35869e-15	3.10304e-18	chr11	123978490	123978491	OR10S1	protein_coding	ENST00000531945.1	-708	CGI:chr11:123741190-123741837	.
cg15023513	0.383362	0.722505	-0.339142	3.65458e-15	7.34273e-18	chr15	87123940	87123941	.	.	.	.	CGI:chr15:88255423-88255783	.
cg01767544	0.566039	0.90507	-0.339031	8.14505e-14	1.12257e-16	chr14	105855010	105855011	IGHG1;IGHG1;IGHG1;IGHG1;IGHG1;IGHG1;IGHG3;IGHG3;IGHM;IGHM;IGHM	IG_C_gene;IG_C_gene;IG_C_gene;IG_C_gene;IG_C_gene;IG_C_gene;IG_C_gene;IG_C_gene;IG_C_gene;IG_C_gene;IG_C_gene	ENST00000612473.1;ENST00000613152.3;ENST00000615822.3;ENST00000618145.3;ENST00000618756.3;ENST00000619212.3;ENST00000616127.1;ENST00000621473.3;ENST00000390559.5;ENST00000610838.2;ENST00000613516.2	150523;356449;207657;157367;683335;356462;183336;150567;1209;85219;380563	CGI:chr14:105855645-105855897	N_Shore
cg14050129	0.556323	0.89534	-0.339017	1.79047e-11	1.35042e-14	chr7	153590506	153590507	.	.	.	.	CGI:chr7:153748079-153749255	.
cg00444390	0.476419	0.815389	-0.33897	5.90148e-17	1.96748e-19	chr11	7928678	7928679	OR10A6;OR10A6;OR10A6	polymorphic_pseudogene;polymorphic_pseudogene;protein_coding	ENST00000623813.1;ENST00000623991.1;ENST00000309838.3	-15;-15;-15	CGI:chr11:8018862-8020011	.
cg06541760	0.474565	0.813473	-0.338908	3.52492e-12	3.17601e-15	chr5	1866611	1866612	.	.	.	.	CGI:chr5:1874793-1878918	.
cg18902148	0.57077	0.909636	-0.338866	3.57036e-09	1.59299e-12	chr11	134812152	134812153	.	.	.	.	CGI:chr11:134762151-134763093	.
cg11005831	0.609071	0.947936	-0.338864	3.48891e-11	2.45278e-14	chr5	15928332	15928333	FBXL7;FBXL7;FBXL7	protein_coding;protein_coding;protein_coding	ENST00000329673.8;ENST00000504595.1;ENST00000510662.1	443;428135;426893	CGI:chr5:15927979-15928409	Island
cg13608273	0.544314	0.883089	-0.338775	1.52213e-11	1.16894e-14	chr5	3225808	3225809	.	.	.	.	CGI:chr5:3187985-3188261	.
cg04388226	0.357645	0.696405	-0.338759	2.08586e-11	1.5477e-14	chr12	127881486	127881487	FLJ37505;FLJ37505	lincRNA;lincRNA	ENST00000536342.1;ENST00000614177.1	-132;-159	CGI:chr12:127761047-127761291	.
cg06298530	0.367008	0.705669	-0.338661	1.7721e-20	1.65617e-22	chr15	25236063	25236064	SNHG14;SNORD115-36	processed_transcript;snoRNA	ENST00000453082.4;ENST00000365629.1	17710;-23	CGI:chr15:25438248-25439268	.
cg10447095	0.46878	0.80744	-0.33866	1.60407e-16	4.70008e-19	chr16	60644806	60644807	.	.	.	.	CGI:chr16:59754888-59755168	.
cg24423088	0.482924	0.821532	-0.338608	3.32844e-17	1.19482e-19	chr21	30813047	30813048	KRTAP8-1	protein_coding	ENST00000329621.5	206	CGI:chr21:31251828-31252066	.
cg05054531	0.304527	0.64303	-0.338503	1.26789e-21	1.76955e-23	chr12	132353151	132353152	.	.	.	.	CGI:chr12:132358785-132359566	.
cg21531873	0.545351	0.883797	-0.338446	2.85742e-10	1.61619e-13	chr12	110340811	110340812	ATP2A2;ATP2A2;ATP2A2;ATP2A2	protein_coding;protein_coding;protein_coding;protein_coding	ENST00000308664.9;ENST00000377685.8;ENST00000539276.5;ENST00000548169.2	59694;59513;59129;48761	CGI:chr12:110280587-110282257	.
cg17301052	0.424738	0.763177	-0.338439	2.64381e-16	7.32937e-19	chr5	3386961	3386962	.	.	.	.	CGI:chr5:3326214-3326531	.
cg07468956	0.461706	0.800137	-0.338431	6.35587e-13	6.97243e-16	chr17	82331825	82331826	SECTM1;SECTM1;SECTM1;SECTM1;SECTM1;SECTM1;SECTM1	protein_coding;protein_coding;protein_coding;protein_coding;protein_coding;protein_coding;protein_coding	ENST00000269389.6;ENST00000580437.4;ENST00000581691.4;ENST00000581864.4;ENST00000582290.4;ENST00000582563.4;ENST00000583093.4	2174;1938;2250;1924;1942;1945;1939	CGI:chr17:82333144-82334518	N_Shore
cg25425089	0.46489	0.803287	-0.338397	4.79315e-16	1.2379e-18	chr10	129415945	129415946	.	.	.	.	CGI:chr10:129466684-129467446	.
cg05283646	0.622045	0.960436	-0.338391	2.60778e-10	1.48773e-13	chr8	1155957	1155958	CTD-2281E23.2	processed_transcript	ENST00000520524.4	51074	CGI:chr8:1155614-1156066	Island
cg04456219	0.300975	0.639347	-0.338372	2.17784e-08	8.43171e-12	chr7	17234713	17234714	.	.	.	.	CGI:chr7:17298628-17299477	.
cg03933026	0.54224	0.880612	-0.338372	2.69166e-12	2.50254e-15	chr11	130219995	130219996	.	.	.	.	CGI:chr11:130209304-130209746	.
cg06651505	0.580173	0.918534	-0.338361	3.77063e-11	2.63181e-14	chr5	167375420	167375421	TENM2	protein_coding	ENST00000518659.4	90620	CGI:chr5:166978479-166978687	.
cg03928812	0.335043	0.673396	-0.338353	6.36527e-15	1.192e-17	chr11	59866803	59866804	TCN1;TCN1;TCN1	protein_coding;protein_coding;protein_coding	ENST00000257264.3;ENST00000532419.4;ENST00000534531.1	-227;-313;-331	CGI:chr11:59898106-59898384	.
cg16887183	0.448721	0.786963	-0.338241	7.81752e-15	1.43118e-17	chr15	80365707	80365708	RP11-210M15.2	lincRNA	ENST00000559267.1	32301	CGI:chr15:80403734-80405051	.
cg24020826	0.404145	0.742313	-0.338168	1.47208e-15	3.32727e-18	chr8	139617937	139617938	KCNK9;KCNK9;KCNK9	protein_coding;protein_coding;protein_coding	ENST00000303015.2;ENST00000522317.4;ENST00000523477.1	85062;85105;-931	CGI:chr8:139618853-139619089	N_Shore
cg08382534	0.489437	0.827599	-0.338162	1.60798e-12	1.58155e-15	chr16	84024996	84024997	SLC38A8;SLC38A8	protein_coding;protein_coding	ENST00000299709.6;ENST00000568178.1	17162;17641	CGI:chr16:84052261-84052510	.
cg02511845	0.370839	0.708945	-0.338106	1.28016e-17	5.17685e-20	chr8	1480246	1480247	.	.	.	.	CGI:chr8:1482586-1483158	N_Shelf
cg12624721	0.542335	0.880218	-0.337883	3.45386e-14	5.29733e-17	chr8	142430214	142430215	.	.	.	.	CGI:chr8:142428011-142428269	S_Shore
cg18627496	0.433428	0.77131	-0.337882	1.30152e-13	1.70931e-16	chr20	61774154	61774155	CDH4;CDH4;CDH4	protein_coding;protein_coding;protein_coding	ENST00000543233.2;ENST00000611855.3;ENST00000614565.3	174392;204018;521727	CGI:chr20:61773042-61773372	S_Shore
cg09923978	0.483111	0.820918	-0.337807	1.59789e-12	1.57361e-15	chr11	58440288	58440289	OR5B12	protein_coding	ENST00000302572.2	-114	CGI:chr11:58578200-58579848	.
cg09134205	0.509069	0.846833	-0.337764	3.46484e-12	3.13115e-15	chr7	154306130	154306131	DPP6;DPP6;DPP6;DPP6;DPP6;DPP6;DPP6;DPP6	protein_coding;protein_coding;protein_coding;protein_coding;protein_coding;protein_coding;protein_coding;protein_coding	ENST00000332007.6;ENST00000377770.6;ENST00000404039.4;ENST00000406326.4;ENST00000427557.1;ENST00000462622.4;ENST00000496611.1;ENST00000619756.3	1019;253449;419032;253711;687;1019;917;867	CGI:chr7:154304879-154305196	S_Shore
cg17922998	0.343374	0.681128	-0.337754	3.70198e-14	5.62611e-17	chr8	60951138	60951139	AC022182.1;AC022182.1;AC022182.1	lincRNA;lincRNA;lincRNA	ENST00000526936.4;ENST00000527672.1;ENST00000529234.4	41084;32156;40547	CGI:chr8:60922140-60923312	.
cg21846949	0.404576	0.742322	-0.337746	1.02772e-16	3.18602e-19	chr2	33275822	33275823	LTBP1;LTBP1;LTBP1;LTBP1;LTBP1;LTBP1	protein_coding;protein_coding;protein_coding;protein_coding;protein_coding;protein_coding	ENST00000402934.4;ENST00000404525.4;ENST00000404816.5;ENST00000407925.4;ENST00000415140.5;ENST00000418533.5	141196;141182;328849;141164;-88;141224	CGI:chr2:33599243-33599790	.
cg23180780	0.323383	0.661114	-0.337731	2.04567e-21	2.64201e-23	chr2	12120360	12120361	AC096559.1;AC096559.1;AC096559.1;AC096559.1	lincRNA;lincRNA;lincRNA;lincRNA	ENST00000412294.4;ENST00000438292.4;ENST00000449986.1;ENST00000451644.4	113231;254474;13775;113243	CGI:chr2:11784857-11785127	.
cg21754343	0.455046	0.792774	-0.337728	1.73218e-11	1.31108e-14	chr1	152686321	152686322	LCE2B	protein_coding	ENST00000368780.3	197	CGI:chr1:152515581-152515794	.
cg11304383	0.402592	0.740299	-0.337707	6.20353e-17	2.05902e-19	chr12	7666039	7666040	APOBEC1;APOBEC1	protein_coding;protein_coding	ENST00000229304.4;ENST00000467171.2	-145;-135	CGI:chr12:7628407-7628652	.
cg04851639	0.428253	0.765942	-0.337689	2.35439e-12	2.22142e-15	chr8	1070857	1070858	ERICH1-AS1;ERICH1-AS1	antisense;antisense	ENST00000522092.4;ENST00000578889.1	333205;187528	CGI:chr8:1098559-1098873	.
cg09473613	0.463537	0.801226	-0.337689	7.43648e-14	1.03531e-16	chr1	23826114	23826115	HMGCL;HMGCL;HMGCL;HMGCL;HMGCL;HMGCL	protein_coding;protein_coding;protein_coding;protein_coding;protein_coding;protein_coding	ENST00000235958.4;ENST00000374487.5;ENST00000374490.6;ENST00000436439.5;ENST00000509389.4;ENST00000513148.1	-711;12507;-654;-685;-686;-697	CGI:chr1:23800300-23801059	.
cg01277983	0.384096	0.721777	-0.337681	9.06336e-18	3.83576e-20	chr22	43439681	43439682	MPPED1;MPPED1	protein_coding;protein_coding	ENST00000417669.5;ENST00000443721.1	28484;27666	CGI:chr22:43434979-43435242	.
cg19049754	0.404934	0.742495	-0.337561	1.8238e-24	7.13218e-26	chr10	80207234	80207235	LINC00857;LINC00857	lincRNA;lincRNA	ENST00000422847.1;ENST00000432308.1	-477;-976	CGI:chr10:80207233-80207761	Island
cg05558615	0.332459	0.669978	-0.337519	4.96916e-21	5.57438e-23	chr17	5916841	5916842	WSCD1;WSCD1	protein_coding;protein_coding	ENST00000563763.4;ENST00000573619.1	144606;143914	CGI:chr17:6069995-6071129	.
cg16570669	0.465267	0.802707	-0.33744	3.39881e-17	1.21759e-19	chr11	127053211	127053212	RP11-168K9.1	lincRNA	ENST00000530177.1	31456	CGI:chr11:127003196-127003914	.
cg14036821	0.556237	0.893664	-0.337428	2.82124e-12	2.60964e-15	chr10	2657122	2657123	.	.	.	.	CGI:chr10:2772811-2773277	.
cg02936347	0.407703	0.745087	-0.337384	1.64372e-18	8.5866e-21	chr16	20326877	20326878	GP2;GP2;GP2;GP2;GP2;GP2;GP2;GP2;GP2;GP2	protein_coding;protein_coding;protein_coding;protein_coding;protein_coding;protein_coding;protein_coding;protein_coding;protein_coding;protein_coding	ENST00000302555.8;ENST00000341642.8;ENST00000381360.8;ENST00000381362.7;ENST00000572347.4;ENST00000572478.4;ENST00000574982.1;ENST00000575449.1;ENST00000575582.4;ENST00000575730.1	704;631;932;631;631;631;-458;36;550;632	CGI:chr16:20348445-20349176	.
cg20788020	0.397037	0.734396	-0.33736	2.42052e-15	5.12822e-18	chr8	104665273	104665274	ZFPM2	protein_coding	ENST00000521923.4	74539	CGI:chr8:104588225-104589476	.
cg18170680	0.454947	0.792214	-0.337267	1.99824e-11	1.48932e-14	chr22	49048560	49048561	.	.	.	.	CGI:chr22:49051617-49051852	N_Shelf
cg06507590	0.482287	0.819538	-0.337251	5.1167e-14	7.4603e-17	chr5	167318037	167318038	TENM2	protein_coding	ENST00000518659.4	33237	CGI:chr5:166978479-166978687	.
cg11584519	0.374754	0.71199	-0.337236	3.31836e-18	1.59537e-20	chr5	16175758	16175759	MARCH11;MARCH11;MARCH11	protein_coding;protein_coding;protein_coding	ENST00000332432.8;ENST00000505509.1;ENST00000507111.1	4018;5005;2072	CGI:chr5:16178955-16180311	N_Shelf
cg02930348	0.39201	0.729217	-0.337207	1.60898e-16	4.70855e-19	chr20	61393883	61393884	CDH4	protein_coding	ENST00000614565.3	141456	CGI:chr20:61390520-61390734	S_Shelf
cg18647449	0.498682	0.835869	-0.337187	2.29363e-14	3.66866e-17	chr10	132916718	132916719	CFAP46;CFAP46	protein_coding;protein_coding	ENST00000368586.8;ENST00000486104.4	25868;-35	CGI:chr10:132916294-132916518	S_Shore
cg13744508	0.408776	0.745794	-0.337018	1.16864e-09	5.78371e-13	chr9	130919132	130919133	FIBCD1;FIBCD1;FIBCD1;FIBCD1;FIBCD1	protein_coding;protein_coding;protein_coding;protein_coding;protein_coding	ENST00000372337.5;ENST00000372338.7;ENST00000444139.4;ENST00000448616.4;ENST00000451466.1	17245;19719;10848;19937;20009	CGI:chr9:130919034-130919274	Island
cg15422147	0.434636	0.771637	-0.337001	8.02052e-18	3.44651e-20	chr18	63477106	63477107	SERPINB5;SERPINB5;SERPINB5	protein_coding;protein_coding;protein_coding	ENST00000382771.7;ENST00000424602.1;ENST00000489441.4	344;-22;147	CGI:chr18:63422029-63423124	.
cg23400451	0.435534	0.772503	-0.336969	6.1749e-14	8.789e-17	chr17	10470411	10470412	MYH4;MYHAS;RP11-799N11.1;RP11-799N11.1	protein_coding;antisense;antisense;antisense	ENST00000255381.2;ENST00000587182.2;ENST00000399342.5;ENST00000581304.1	-851;87266;87278;87254	CGI:chr17:10638164-10638477	.
cg06505619	0.442382	0.779326	-0.336944	1.78601e-17	6.93789e-20	chr16	648072	648073	FAM195A;FAM195A;FAM195A;FAM195A;FAM195A;FAM195A;FAM195A;FAM195A;MSLN;WDR90;WDR90;WDR90;WDR90;WDR90;WDR90	protein_coding;protein_coding;protein_coding;protein_coding;protein_coding;protein_coding;protein_coding;protein_coding;protein_coding;protein_coding;protein_coding;protein_coding;protein_coding;protein_coding;protein_coding	ENST00000307650.7;ENST00000474840.4;ENST00000491999.4;ENST00000575894.1;ENST00000611328.3;ENST00000615744.3;ENST00000619674.1;ENST00000620462.3;ENST00000620831.3;ENST00000293879.7;ENST00000420061.5;ENST00000549091.4;ENST00000549648.4;ENST00000552943.4;ENST00000615333.3	6258;6142;6225;1324;11168;5620;2945;5588;4809;-1346;-1282;-1254;-1282;-1240;-1282	CGI:chr16:648826-650244	N_Shore
cg13205848	0.383275	0.720074	-0.336798	1.16976e-12	1.19417e-15	chr12	5566339	5566340	ANO2;ANO2;ANO2	protein_coding;protein_coding;protein_coding	ENST00000327087.11;ENST00000356134.8;ENST00000546188.4	379894;379894;378921	CGI:chr12:5494421-5494824	.
cg11154040	0.440261	0.77704	-0.336779	2.68959e-14	4.22607e-17	chr4	3793336	3793337	.	.	.	.	CGI:chr4:3772124-3772335	.
cg01888055	0.384203	0.720976	-0.336772	8.76982e-20	6.62945e-22	chr15	25203205	25203206	SNHG14;SNHG14;SNORD115-18;SNORD115-19	processed_transcript;processed_transcript;snoRNA;snoRNA	ENST00000424208.4;ENST00000424333.4;ENST00000363293.1;ENST00000363098.1	21361;5776;-23;-1153	CGI:chr15:25438248-25439268	.
cg02832905	0.501	0.837755	-0.336755	1.18782e-13	1.57865e-16	chr18	77880027	77880028	.	.	.	.	CGI:chr18:77899962-77900186	.
cg00978051	0.456318	0.793027	-0.336709	5.35759e-18	2.43527e-20	chr16	59752375	59752376	APOOP5;APOOP5	transcribed_processed_pseudogene;transcribed_processed_pseudogene	ENST00000564533.2;ENST00000565921.3	2440;2474	CGI:chr16:59754888-59755168	N_Shelf
cg03040848	0.44127	0.777963	-0.336693	1.13299e-15	2.64001e-18	chr16	88926645	88926646	CBFA2T3;CBFA2T3;CBFA2T3;CBFA2T3;CBFA2T3;CBFA2T3;CBFA2T3	protein_coding;protein_coding;protein_coding;protein_coding;protein_coding;protein_coding;protein_coding	ENST00000268679.7;ENST00000327483.8;ENST00000563640.1;ENST00000564416.1;ENST00000569443.4;ENST00000569464.4;ENST00000570046.1	50560;14554;50436;14556;15200;15165;31131	CGI:chr16:88927729-88928034	N_Shore
cg09323898	0.487046	0.823702	-0.336656	9.98645e-10	5.0212e-13	chr1	163615066	163615067	.	.	.	.	CGI:chr1:163423087-163423310	.
cg24560678	0.427837	0.764461	-0.336624	7.28845e-15	1.34509e-17	chr5	167064291	167064292	.	.	.	.	CGI:chr5:166978479-166978687	.
cg00786657	0.525303	0.861893	-0.336591	9.80761e-14	1.32817e-16	chr15	87972579	87972580	NTRK3;NTRK3;NTRK3;NTRK3;NTRK3;NTRK3;NTRK3;NTRK3;NTRK3	protein_coding;protein_coding;protein_coding;protein_coding;protein_coding;protein_coding;protein_coding;protein_coding;protein_coding	ENST00000355254.5;ENST00000357724.5;ENST00000360948.5;ENST00000394480.5;ENST00000542733.5;ENST00000557856.4;ENST00000558676.4;ENST00000626019.1;ENST00000629765.1	284153;284153;284153;284169;233355;283599;283601;283575;283591	CGI:chr15:88255423-88255783	.
cg17969662	0.425791	0.762373	-0.336582	1.36695e-10	8.35179e-14	chr1	220928070	220928071	.	.	.	.	CGI:chr1:220895440-220895817	.
cg02846963	0.351383	0.687936	-0.336553	3.03859e-20	2.63156e-22	chr4	181509662	181509663	.	.	.	.	CGI:chr4:182141125-182141328	.
cg09175734	0.506584	0.843084	-0.3365	9.00484e-13	9.47308e-16	chr5	170083077	170083078	DOCK2;DOCK2;DOCK2;DOCK2;DOCK2	protein_coding;protein_coding;protein_coding;protein_coding;protein_coding	ENST00000256935.11;ENST00000519868.1;ENST00000520450.4;ENST00000520908.4;ENST00000523351.4	445829;7632;26638;379127;321769	CGI:chr5:170106076-170106530	.
cg17277001	0.358985	0.695442	-0.336457	1.18601e-11	9.33656e-15	chr5	1244388	1244389	SLC6A18	protein_coding	ENST00000324642.3	19032	CGI:chr5:1243534-1243835	S_Shore
cg08756898	0.381111	0.717525	-0.336415	6.24431e-15	1.17091e-17	chr2	128470507	128470508	.	.	.	.	CGI:chr2:128471027-128471233	N_Shore
cg08271259	0.470001	0.806398	-0.336397	4.07016e-11	2.81895e-14	chr1	219331281	219331282	.	.	.	.	CGI:chr1:219173767-219174230	.
cg02131853	0.272896	0.609253	-0.336357	2.55453e-25	1.36502e-26	chr4	39033017	39033018	TMEM156;TMEM156;TMEM156;TMEM156	protein_coding;protein_coding;protein_coding;protein_coding	ENST00000344606.6;ENST00000372489.2;ENST00000381938.3;ENST00000495029.1	-94;-609;-595;-296	CGI:chr4:39044566-39045448	.
cg11923914	0.478213	0.814538	-0.336325	2.3729e-13	2.90035e-16	chr5	154692106	154692107	.	.	.	.	CGI:chr5:154690700-154690910	S_Shore
cg07021275	0.382722	0.719034	-0.336311	2.39911e-17	9.01921e-20	chr8	1377679	1377680	.	.	.	.	CGI:chr8:1379165-1379381	N_Shore
cg23012855	0.464009	0.800311	-0.336301	1.46308e-16	4.32991e-19	chr1	234975581	234975582	.	.	.	.	CGI:chr1:235104239-235104514	.
cg08680598	0.471927	0.808196	-0.336269	2.19367e-13	2.70871e-16	chr22	49591332	49591333	C22orf34;C22orf34	lincRNA;lincRNA	ENST00000414287.4;ENST00000416411.1	66173;66126	CGI:chr22:49615310-49616064	.
cg06753918	0.46886	0.805001	-0.336141	2.47092e-13	3.00494e-16	chr5	6182102	6182103	.	.	.	.	CGI:chr5:6378178-6378733	.
cg01165362	0.384971	0.721101	-0.33613	8.27871e-17	2.64014e-19	chr1	248681908	248681909	OR14I1	protein_coding	ENST00000342623.4	397	CGI:chr1:248691729-248692169	.
cg23274984	0.354933	0.691003	-0.336069	2.25038e-14	3.60886e-17	chr2	128878756	128878757	.	.	.	.	CGI:chr2:128901725-128901994	.
cg09631769	0.358495	0.694557	-0.336061	2.08647e-21	2.6848e-23	chr22	48981074	48981075	.	.	.	.	CGI:chr22:48980583-48980848	S_Shore
cg14355941	0.49749	0.833523	-0.336032	6.07754e-11	4.03402e-14	chr14	101060148	101060149	MIR496	miRNA	ENST00000385226.2	-411	CGI:chr14:101065306-101066047	.
cg05164181	0.50816	0.844168	-0.336009	2.91167e-15	6.02296e-18	chr15	94744657	94744658	.	.	.	.	CGI:chr15:94844772-94845407	.
cg09832243	0.438846	0.774843	-0.335997	2.15233e-14	3.4699e-17	chr2	124046703	124046704	CNTNAP5;CNTNAP5	protein_coding;protein_coding	ENST00000423939.2;ENST00000431078.1	21415;21415	CGI:chr2:124024675-124025678	.
cg01481609	0.50441	0.840331	-0.335921	2.13546e-15	4.6037e-18	chr10	133106847	133106848	GPR123;GPR123;GPR123	protein_coding;protein_coding;protein_coding	ENST00000392606.2;ENST00000392607.6;ENST00000607359.4	4600;18941;35917	CGI:chr10:133105251-133105471	S_Shore
cg20995977	0.457117	0.792923	-0.335806	9.45887e-19	5.29273e-21	chr1	4796936	4796937	.	.	.	.	CGI:chr1:4772291-4772493	.
cg20099511	0.397794	0.733561	-0.335767	9.64542e-20	7.24441e-22	chr7	63444020	63444021	.	.	.	.	CGI:chr7:63398046-63398448	.
cg11006791	0.509239	0.844973	-0.335734	1.7618e-11	1.33124e-14	chr5	2547173	2547174	.	.	.	.	CGI:chr5:2564383-2564638	.
cg14826683	0.335996	0.671716	-0.335719	1.40548e-12	1.40729e-15	chr1	153041354	153041355	SPRR2D;SPRR2D;SPRR2D;SPRR2D	protein_coding;protein_coding;protein_coding;protein_coding	ENST00000360379.3;ENST00000368756.1;ENST00000368757.1;ENST00000368758.3	-235;575;578;578	CGI:chr1:153260996-153261837	.
cg23476447	0.587987	0.923696	-0.335709	2.33202e-09	1.08064e-12	chr15	25240849	25240850	SNHG14;SNORD115-39	processed_transcript;snoRNA	ENST00000453082.4;ENST00000363694.1	22496;-898	CGI:chr15:25438248-25439268	.
cg14844815	0.380104	0.715803	-0.335699	3.4501e-14	5.29272e-17	chr5	6203105	6203106	.	.	.	.	CGI:chr5:6378178-6378733	.
cg09790780	0.437774	0.77344	-0.335666	1.76382e-14	2.91472e-17	chr16	7432012	7432013	RBFOX1;RBFOX1;RBFOX1;RBFOX1;RBFOX1;RBFOX1;RBFOX1;RBFOX1;RBFOX1;RBFOX1;RBFOX1;RBFOX1;RBFOX1;RBFOX1;RBFOX1	protein_coding;protein_coding;protein_coding;protein_coding;protein_coding;protein_coding;protein_coding;protein_coding;protein_coding;protein_coding;protein_coding;protein_coding;protein_coding;protein_coding;protein_coding	ENST00000311745.8;ENST00000340209.7;ENST00000355637.7;ENST00000422070.7;ENST00000436368.5;ENST00000535565.5;ENST00000547338.4;ENST00000547372.4;ENST00000547605.4;ENST00000550418.4;ENST00000551752.4;ENST00000552089.4;ENST00000553186.4;ENST00000569889.1;ENST00000620507.3	99261;99261;99261;1412308;99261;948832;658202;1412418;1412917;1412880;948218;948625;1412880;9233;99261	CGI:chr16:7518193-7518411	.
cg16662043	0.429038	0.764672	-0.335634	1.1446e-15	2.66186e-18	chr16	48812320	48812321	.	.	.	.	CGI:chr16:48810640-48811353	S_Shore
cg26159860	0.402168	0.737801	-0.335632	1.86589e-13	2.35295e-16	chr11	133599298	133599299	.	.	.	.	CGI:chr11:133787728-133787949	.
cg22911200	0.388554	0.724178	-0.335624	2.29167e-15	4.89972e-18	chr8	138112182	138112183	.	.	.	.	CGI:chr8:138496552-138497531	.
cg25863289	0.606827	0.94242	-0.335592	1.91022e-10	1.12546e-13	chr15	101653213	101653214	TM2D3;TM2D3;TM2D3;TM2D3;TM2D3;TM2D3;TM2D3;TM2D3;TM2D3;TM2D3	protein_coding;protein_coding;protein_coding;protein_coding;protein_coding;protein_coding;protein_coding;protein_coding;protein_coding;protein_coding	ENST00000333202.6;ENST00000347970.6;ENST00000428002.5;ENST00000558677.4;ENST00000559024.4;ENST00000559107.4;ENST00000560013.4;ENST00000560212.1;ENST00000560910.4;ENST00000561356.1	-845;-821;-836;-915;-830;-828;-821;-1214;-831;-831	CGI:chr15:101651962-101653142	S_Shore
cg06400119	0.381629	0.717189	-0.33556	8.93204e-12	7.28e-15	chr7	158253530	158253531	PTPRN2;PTPRN2;PTPRN2;PTPRN2	protein_coding;protein_coding;protein_coding;protein_coding	ENST00000389413.6;ENST00000389416.7;ENST00000389418.7;ENST00000409483.4	334244;334182;334150;334259	CGI:chr7:158245016-158245356	.
cg21547763	0.422207	0.75776	-0.335553	1.7871e-15	3.95626e-18	chr1	162382186	162382187	C1orf226;C1orf226;C1orf226;RP11-565P22.6	protein_coding;protein_coding;protein_coding;protein_coding	ENST00000420220.1;ENST00000426197.2;ENST00000458626.3;ENST00000367932.3	15277;3344;455;14873	CGI:chr1:162367086-162367531	.
cg01311955	0.43989	0.775374	-0.335484	6.39293e-15	1.19622e-17	chr11	133095355	133095356	OPCML;OPCML	protein_coding;protein_coding	ENST00000524381.4;ENST00000529038.4	437165;437048	CGI:chr11:133082643-133083412	.
cg07811054	0.403054	0.738534	-0.33548	7.79982e-17	2.50913e-19	chr15	96776681	96776682	SPATA8-AS1;SPATA8-AS1	antisense;antisense	ENST00000558722.1;ENST00000560888.4	6632;4974	CGI:chr15:96416111-96417301	.
cg01973778	0.39886	0.734307	-0.335447	8.83133e-16	2.12475e-18	chr16	83246906	83246907	CDH13;CDH13;CDH13;CDH13;CDH13;CDH13;CDH13	protein_coding;protein_coding;protein_coding;protein_coding;protein_coding;protein_coding;protein_coding	ENST00000268613.13;ENST00000428848.6;ENST00000539548.5;ENST00000566620.4;ENST00000567109.4;ENST00000569454.1;ENST00000622885.3	619940;619935;619935;388552;620102;320947;388549	CGI:chr16:83807807-83808383	.
cg01084270	0.476914	0.812357	-0.335443	5.3094e-13	5.96179e-16	chr5	35904467	35904468	CAPSL;CAPSL	protein_coding;protein_coding	ENST00000397366.4;ENST00000397367.5	34169;34313	CGI:chr5:36151395-36152277	.
cg16167060	0.506363	0.841721	-0.335358	1.27172e-14	2.1867e-17	chr2	235026301	235026302	SH3BP4;SH3BP4;SH3BP4;SH3BP4;SH3BP4;SH3BP4;SH3BP4	protein_coding;protein_coding;protein_coding;protein_coding;protein_coding;protein_coding;protein_coding	ENST00000344528.7;ENST00000392011.5;ENST00000409212.4;ENST00000416021.4;ENST00000444916.4;ENST00000446904.4;ENST00000454947.1	47597;74327;47615;74224;47595;44676;31460	CGI:chr2:235042808-235043170	.
cg04742334	0.379481	0.714733	-0.335252	6.01523e-16	1.52009e-18	chr20	39221605	39221606	RP4-705O1.1	lincRNA	ENST00000412672.1	3144	CGI:chr20:39049930-39050458	.
cg02795546	0.523378	0.858608	-0.33523	1.28773e-12	1.30149e-15	chr1	247534573	247534574	GCSAML;GCSAML;GCSAML;GCSAML;GCSAML;GCSAML;GCSAML;GCSAML;GCSAML;GCSAML;OR2C3	protein_coding;protein_coding;protein_coding;protein_coding;protein_coding;protein_coding;protein_coding;protein_coding;protein_coding;protein_coding;protein_coding	ENST00000366489.4;ENST00000366491.5;ENST00000463359.4;ENST00000526896.4;ENST00000527084.4;ENST00000527541.4;ENST00000529512.4;ENST00000531662.1;ENST00000536561.4;ENST00000623578.2;ENST00000366487.3	27452;27457;16140;27448;27514;27499;16120;16098;27514;16120;-733	CGI:chr1:247530733-247531199	S_Shelf
cg05033952	0.473391	0.808585	-0.335194	1.30967e-20	1.28579e-22	*	-1	-1	.	.	.	.	.	.
cg05539265	0.370927	0.706121	-0.335194	1.7982e-21	2.38398e-23	chr2	102100978	102100979	IL1R1;IL1R1;IL1R1	protein_coding;protein_coding;protein_coding	ENST00000409929.4;ENST00000424272.4;ENST00000452403.4	30601;30601;36433	CGI:chr2:102142346-102143117	.
cg21669226	0.505006	0.840173	-0.335167	2.3568e-15	5.01752e-18	chr8	40060090	40060091	.	.	.	.	CGI:chr8:39522706-39523014	.
cg22010957	0.470027	0.805185	-0.335158	1.53997e-14	2.58097e-17	chr8	48976429	48976430	.	.	.	.	CGI:chr8:48977827-48978315	N_Shore
cg15115960	0.48746	0.822551	-0.335091	5.78992e-12	4.96623e-15	chr10	128500719	128500720	.	.	.	.	CGI:chr10:128500595-128500895	Island
cg02952295	0.396381	0.731457	-0.335076	3.28745e-11	2.32657e-14	chr2	234004544	234004545	TRPM8;TRPM8;TRPM8;TRPM8;TRPM8	protein_coding;protein_coding;protein_coding;protein_coding;protein_coding	ENST00000324695.7;ENST00000433712.5;ENST00000439148.1;ENST00000444298.4;ENST00000456930.1	87145;87145;22735;87138;37925	CGI:chr2:233939003-233939213	.
cg18580385	0.494829	0.829837	-0.335008	7.79109e-11	5.04184e-14	chr10	102604761	102604762	SUFU;SUFU;SUFU	protein_coding;protein_coding;protein_coding	ENST00000369899.5;ENST00000369902.6;ENST00000423559.2	100753;100773;100681	CGI:chr10:102642064-102645211	.
cg26110562	0.549334	0.884335	-0.335002	2.67275e-07	8.84055e-11	chr2	235968817	235968818	AGAP1;AGAP1;AGAP1;AGAP1;AGAP1;AGAP1;AGAP1	protein_coding;protein_coding;protein_coding;protein_coding;protein_coding;protein_coding;protein_coding	ENST00000304032.11;ENST00000336665.8;ENST00000409538.4;ENST00000418654.1;ENST00000428334.5;ENST00000448025.4;ENST00000614409.3	474709;474709;299212;59974;259638;85421;259639	CGI:chr2:235959008-235959262	.
cg04275239	0.456357	0.791299	-0.334941	5.30119e-14	7.68766e-17	chr10	131114698	131114699	TCERG1L;TCERG1L	protein_coding;protein_coding	ENST00000368642.4;ENST00000483040.1	197024;145639	CGI:chr10:131095165-131095425	.
cg25119415	0.391173	0.726113	-0.33494	1.66206e-13	2.12423e-16	chr1	158830145	158830146	MNDA;MNDA	protein_coding;protein_coding	ENST00000368141.4;ENST00000491210.1	-1173;-1207	CGI:chr1:159171412-159171928	.
cg26832666	0.449057	0.783957	-0.3349	2.1349e-13	2.64267e-16	chr1	247842054	247842055	OR11L1	protein_coding	ENST00000355784.3	-157	CGI:chr1:247857028-247857950	.
cg00676536	0.415292	0.750158	-0.334866	5.30207e-19	3.18579e-21	chr2	41697113	41697114	.	.	.	.	CGI:chr2:41697452-41697809	N_Shore
cg04841358	0.446541	0.781383	-0.334842	6.93781e-12	5.8266e-15	chr8	11039783	11039784	XKR6	protein_coding	ENST00000416569.2	161584	CGI:chr8:11059152-11059807	.
cg11085294	0.509074	0.843908	-0.334835	4.30902e-11	2.96794e-14	chr1	177088495	177088496	ASTN1;ASTN1;ASTN1;ASTN1	protein_coding;protein_coding;protein_coding;protein_coding	ENST00000281881.6;ENST00000361833.5;ENST00000367657.6;ENST00000424564.2	76479;76196;76373;76189	CGI:chr1:177164256-177164710	.
cg14479709	0.305333	0.640068	-0.334735	1.55623e-19	1.11046e-21	chr8	1300746	1300747	CTD-2281E23.1	lincRNA	ENST00000617093.1	1862	CGI:chr8:1297411-1298205	S_Shelf
cg15810386	0.324857	0.659489	-0.334632	4.43956e-21	5.04495e-23	chr5	31362384	31362385	.	.	.	.	CGI:chr5:31193845-31194312	.
cg23603027	0.595361	0.929982	-0.334621	9.61922e-12	7.77086e-15	chr2	466712	466713	.	.	.	.	CGI:chr2:467849-468659	N_Shore
cg01933248	0.442668	0.777246	-0.334578	1.04491e-14	1.83871e-17	chr2	418573	418574	.	.	.	.	CGI:chr2:420051-421142	N_Shore
cg16053651	0.406301	0.740873	-0.334572	1.04949e-11	8.38538e-15	chr6	168457123	168457124	SMOC2;SMOC2	protein_coding;protein_coding	ENST00000354536.8;ENST00000356284.5	15971;15971	CGI:chr6:168440758-168442420	.
cg06740578	0.410947	0.745383	-0.334435	1.18801e-11	9.34915e-15	chr10	129344209	129344210	.	.	.	.	CGI:chr10:129466684-129467446	.
cg01755009	0.53401	0.868445	-0.334435	7.4044e-15	1.36433e-17	chr1	247815388	247815389	OR14A16	protein_coding	ENST00000357627.1	342	CGI:chr1:247857028-247857950	.
cg01054938	0.448895	0.783272	-0.334377	1.68836e-15	3.75788e-18	chr17	50635562	50635563	ABCC3;ABCC3;ABCC3;ABCC3;ABCC3;ABCC3	protein_coding;protein_coding;protein_coding;protein_coding;protein_coding;protein_coding	ENST00000285238.11;ENST00000427699.4;ENST00000502426.4;ENST00000505699.4;ENST00000513511.4;ENST00000515707.1	704;704;660;660;747;784	CGI:chr17:50634689-50635344	S_Shore
cg24877616	0.417575	0.7519	-0.334325	7.20277e-17	2.33856e-19	chr13	112037805	112037806	.	.	.	.	CGI:chr13:112036871-112037219	S_Shore
cg16262963	0.523555	0.857827	-0.334272	1.73532e-11	1.31265e-14	chr14	104385566	104385567	.	.	.	.	CGI:chr14:104429567-104431272	.
cg06204040	0.506554	0.840788	-0.334234	1.37147e-11	1.06392e-14	chr16	88971073	88971074	CBFA2T3;CBFA2T3	protein_coding;protein_coding	ENST00000268679.7;ENST00000563640.1	6132;6008	CGI:chr16:88967652-88967885	S_Shelf
cg25414639	0.511278	0.845469	-0.334191	2.54361e-13	3.08263e-16	chr15	87816963	87816964	.	.	.	.	CGI:chr15:88255423-88255783	.
cg22187125	0.466707	0.800861	-0.334153	2.00991e-13	2.50657e-16	chr19	58054497	58054498	ZSCAN1	protein_coding	ENST00000282326.4	20430	CGI:chr19:58059025-58060411	.
cg16327839	0.491387	0.825524	-0.334137	1.30936e-14	2.24425e-17	chr11	133845369	133845370	SPATA19;SPATA19	protein_coding;protein_coding	ENST00000299140.6;ENST00000532889.1	133;170	CGI:chr11:133832650-133833813	.
cg02726898	0.477634	0.811752	-0.334117	1.97354e-11	1.47326e-14	chr16	1096545	1096546	C1QTNF8;C1QTNF8	protein_coding;protein_coding	ENST00000328449.5;ENST00000621771.1	-300;-897	CGI:chr16:1092315-1094087	S_Shelf
cg01515155	0.488414	0.822424	-0.33401	6.95453e-13	7.55341e-16	chr11	55811887	55811888	OR5L1;OR5L1;OR5L1	polymorphic_pseudogene;polymorphic_pseudogene;protein_coding	ENST00000623450.1;ENST00000625203.1;ENST00000333973.3	519;419;419	CGI:chr11:55872592-55873609	.
cg16659728	0.441424	0.775306	-0.333883	2.98245e-17	1.0834e-19	chr11	68981037	68981038	MRGPRD	protein_coding	ENST00000309106.3	-50	CGI:chr11:69005328-69006244	.
cg00981443	0.459231	0.793099	-0.333868	2.75991e-12	2.55716e-15	chr1	152708687	152708688	LCE4A;LCE4A	protein_coding;protein_coding	ENST00000335535.3;ENST00000368777.1	-361;526	CGI:chr1:152515581-152515794	.
cg14323984	0.416634	0.750441	-0.333807	8.88054e-13	9.36484e-16	chr4	6693476	6693477	AC093323.1;S100P;S100P	protein_coding;protein_coding;protein_coding	ENST00000624473.1;ENST00000296370.3;ENST00000513778.1	-1013;406;-403	CGI:chr4:6709221-6710066	.
cg12393275	0.542107	0.875831	-0.333724	4.99519e-13	5.63973e-16	chr2	79085098	79085099	REG1B;REG1B	protein_coding;protein_coding	ENST00000305089.6;ENST00000454188.4	2896;1750	CGI:chr2:78993066-78993466	.
cg21163701	0.378211	0.71188	-0.333669	3.40212e-17	1.21815e-19	chr8	84253610	84253611	RALYL;RALYL;RALYL;RALYL;RALYL;RALYL;RALYL;RALYL	protein_coding;protein_coding;protein_coding;protein_coding;protein_coding;protein_coding;protein_coding;protein_coding	ENST00000517638.4;ENST00000517988.1;ENST00000518566.4;ENST00000521268.4;ENST00000521695.4;ENST00000522455.4;ENST00000522613.4;ENST00000522647.1	68734;69384;70075;70266;70335;70342;70822;68668	CGI:chr8:84184524-84185012	.
cg26716753	0.523078	0.856722	-0.333644	1.0253e-12	1.06312e-15	chr12	125621443	125621444	TMEM132B;TMEM132B;TMEM132B	protein_coding;protein_coding;protein_coding	ENST00000299308.6;ENST00000535886.2;ENST00000613307.1	294826;-1054;-1010	CGI:chr12:125683894-125684112	.
cg12651953	0.505691	0.839329	-0.333638	1.76162e-14	2.91246e-17	chr17	33534168	33534169	AA06;ASIC2;RP11-31I22.4	sense_intronic;protein_coding;antisense	ENST00000579745.1;ENST00000359872.6;ENST00000585093.1	-407;623127;57	CGI:chr17:33291327-33293447	.
cg14011368	0.459682	0.79332	-0.333638	1.37836e-15	3.14386e-18	chr14	95875201	95875202	TUNAR	lincRNA	ENST00000504119.1	-1192	CGI:chr14:95875872-95877233	N_Shore
cg15020206	0.363828	0.697406	-0.333578	2.05918e-19	1.41178e-21	chr5	3142815	3142816	.	.	.	.	CGI:chr5:3187985-3188261	.
cg24755931	0.500764	0.834329	-0.333565	1.60897e-09	7.72959e-13	chr14	102940858	102940859	CDC42BPB;CDC42BPB;CDC42BPB	protein_coding;protein_coding;protein_coding	ENST00000361246.5;ENST00000559790.1;ENST00000560492.1	116605;-131;-110	CGI:chr14:102939869-102940346	S_Shore
cg05211267	0.604929	0.938478	-0.333549	1.0124e-09	5.08124e-13	chr22	49301791	49301792	.	.	.	.	CGI:chr22:49301608-49301891	Island
cg26700320	0.532675	0.866223	-0.333547	2.70559e-10	1.53789e-13	chr22	48550254	48550255	FAM19A5;FAM19A5	protein_coding;protein_coding	ENST00000336769.8;ENST00000402357.4	60661;60793	CGI:chr22:48560078-48560294	.
cg24021846	0.316892	0.65043	-0.333538	4.05847e-21	4.688e-23	chr7	103916082	103916083	RELN;RELN;RELN	protein_coding;protein_coding;protein_coding	ENST00000343529.8;ENST00000424685.2;ENST00000428762.4	73435;73435;73435	CGI:chr7:103989078-103990267	.
cg06434454	0.617949	0.951463	-0.333514	3.42027e-10	1.8997e-13	chr5	5146207	5146208	ADAMTS16;ADAMTS16;ADAMTS16;CTD-2297D10.1	protein_coding;protein_coding;protein_coding;antisense	ENST00000274181.7;ENST00000433402.2;ENST00000511368.4;ENST00000514848.1	5876;5738;5876;30008	CGI:chr5:5139328-5140828	.
cg02583247	0.481834	0.815323	-0.333489	3.19304e-14	4.93406e-17	chr12	4446145	4446146	FGF6	protein_coding	ENST00000228837.2	-530	CGI:chr12:4445239-4445458	S_Shore
cg03049917	0.419203	0.752645	-0.333442	1.86998e-16	5.37202e-19	chr15	88209160	88209161	NTRK3;NTRK3;NTRK3;NTRK3;NTRK3;NTRK3;NTRK3;NTRK3;NTRK3;NTRK3;NTRK3	protein_coding;protein_coding;protein_coding;protein_coding;protein_coding;protein_coding;protein_coding;protein_coding;protein_coding;protein_coding;protein_coding	ENST00000317501.6;ENST00000355254.5;ENST00000357724.5;ENST00000360948.5;ENST00000394480.5;ENST00000540489.5;ENST00000557856.4;ENST00000558676.4;ENST00000559188.1;ENST00000626019.1;ENST00000629765.1	47000;47572;47572;47572;47588;47572;47018;47020;43463;46994;47010	CGI:chr15:88255423-88255783	.
cg19606290	0.451863	0.785302	-0.333438	1.89953e-17	7.33005e-20	chr19	53701149	53701150	MIR520B	miRNA	ENST00000384989.1	-79	CGI:chr19:53647822-53648987	.
cg21997510	0.471594	0.805	-0.333406	2.66384e-13	3.21443e-16	chr8	10524282	10524283	PRSS51;PRSS55;PRSS55	antisense;protein_coding;protein_coding	ENST00000523024.1;ENST00000328655.6;ENST00000522210.1	23304;-1265;-1265	CGI:chr8:10612285-10612559	.
cg03354554	0.327168	0.66057	-0.333401	3.55443e-12	3.20137e-15	chr11	9759865	9759866	RP11-540A21.2;SBF2-AS1;SBF2-AS1;SBF2-AS1	lincRNA;antisense;antisense;antisense	ENST00000500698.1;ENST00000498905.2;ENST00000499953.5;ENST00000527406.1	-331;1572;1568;1570	CGI:chr11:9758217-9758923	S_Shore
cg14575739	0.440907	0.774203	-0.333296	3.80862e-15	7.61942e-18	chr19	54586602	54586603	LILRA1;LILRA2;LILRA2;LILRA2;LILRA2;LILRA2;LILRA2	protein_coding;protein_coding;protein_coding;protein_coding;protein_coding;protein_coding;protein_coding	ENST00000618665.3;ENST00000251376.6;ENST00000251377.6;ENST00000391737.2;ENST00000391738.6;ENST00000472992.1;ENST00000629481.1	12722;12809;13250;12760;12811;10529;12722	CGI:chr19:54527024-54527284	.
cg16883726	0.478733	0.811995	-0.333263	8.71129e-15	1.57244e-17	chr8	49816773	49816774	.	.	.	.	CGI:chr8:49909710-49910300	.
cg07022289	0.517296	0.850555	-0.333259	4.96738e-12	4.32699e-15	chr1	238062989	238062990	.	.	.	.	CGI:chr1:237783887-237784148	.
cg04574507	0.497501	0.830734	-0.333233	8.1698e-13	8.71777e-16	chr1	158331248	158331249	CD1B;CD1B	protein_coding;protein_coding	ENST00000368168.3;ENST00000451207.4	284;-222	CGI:chr1:158180830-158181713	.
cg17560832	0.444272	0.777481	-0.33321	1.22539e-19	8.96315e-22	chr10	128959072	128959073	RP11-442O18.1	lincRNA	ENST00000453367.1	991	CGI:chr10:128710103-128710394	.
cg13488011	0.364857	0.698047	-0.33319	7.24597e-20	5.67358e-22	chr15	81174500	81174501	IL16	protein_coding	ENST00000560989.1	14924	CGI:chr15:81134158-81134361	.
cg26383138	0.427325	0.760408	-0.333084	4.37655e-10	2.37708e-13	chr2	2115761	2115762	MYT1L;MYT1L;MYT1L	protein_coding;protein_coding;protein_coding	ENST00000399161.5;ENST00000428368.5;ENST00000479156.1	215434;215356;208775	CGI:chr2:2185428-2186366	.
cg00124045	0.553984	0.886947	-0.332963	1.59151e-11	1.21688e-14	chr10	132922389	132922390	CFAP46	protein_coding	ENST00000368586.8	20197	CGI:chr10:132922468-132922750	N_Shore
cg09756014	0.454995	0.787953	-0.332959	1.35168e-17	5.43467e-20	chr16	89085958	89085959	.	.	.	.	CGI:chr16:89080528-89080768	.
cg01182154	0.454568	0.787438	-0.33287	1.06315e-15	2.50069e-18	chr13	111550582	111550583	.	.	.	.	CGI:chr13:111547865-111548546	S_Shelf
cg17367472	0.414918	0.747784	-0.332866	3.49263e-20	2.97788e-22	chr21	30881842	30881843	KRTAP11-1	protein_coding	ENST00000332378.5	-286	CGI:chr21:31251828-31252066	.
cg17811994	0.459252	0.792036	-0.332784	1.08115e-12	1.11197e-15	chr8	73420594	73420595	STAU2;STAU2;STAU2-AS1;STAU2-AS1	protein_coding;protein_coding;antisense;antisense	ENST00000522695.4;ENST00000524300.4;ENST00000517604.1;ENST00000522703.1	317734;326344;519;589	CGI:chr8:73448814-73449174	.
cg18577239	0.345696	0.678474	-0.332777	5.12831e-19	3.10001e-21	chr12	53561880	53561881	ATF7;ATF7;ATF7;ATF7;ATF7;ATF7;ATF7;ATF7;RP11-793H13.10	protein_coding;protein_coding;protein_coding;protein_coding;protein_coding;protein_coding;protein_coding;protein_coding;protein_coding	ENST00000420353.5;ENST00000456903.7;ENST00000548118.5;ENST00000548446.5;ENST00000551480.2;ENST00000588078.4;ENST00000588232.4;ENST00000591397.1;ENST00000591834.1	64528;64121;64117;64491;64100;64092;64484;64531;64100	CGI:chr12:53500666-53501529	.
cg02039214	0.430542	0.763308	-0.332766	7.65815e-17	2.4681e-19	chr15	87978464	87978465	NTRK3;NTRK3;NTRK3;NTRK3;NTRK3;NTRK3;NTRK3;NTRK3;NTRK3;NTRK3;NTRK3	protein_coding;protein_coding;protein_coding;protein_coding;protein_coding;protein_coding;protein_coding;protein_coding;protein_coding;protein_coding;protein_coding	ENST00000317501.6;ENST00000355254.5;ENST00000357724.5;ENST00000360948.5;ENST00000394480.5;ENST00000542733.5;ENST00000557856.4;ENST00000558676.4;ENST00000560201.1;ENST00000626019.1;ENST00000629765.1	277696;278268;278268;278268;278284;227470;277714;277716;340;277690;277706	CGI:chr15:88255423-88255783	.
cg15231942	0.352527	0.685251	-0.332724	3.41358e-13	4.0153e-16	chr19	873330	873331	MED16;MED16;MED16;MED16;MED16;MED16;MED16;MED16;MED16	protein_coding;protein_coding;protein_coding;protein_coding;protein_coding;protein_coding;protein_coding;protein_coding;protein_coding	ENST00000269814.7;ENST00000312090.9;ENST00000325464.4;ENST00000395808.6;ENST00000589119.4;ENST00000606248.4;ENST00000607471.4;ENST00000616387.3;ENST00000617672.1	19871;19864;19889;19889;17802;19887;12580;17819;17819	CGI:chr19:875214-875420	N_Shore
cg22368204	0.365806	0.698493	-0.332687	4.01157e-15	7.97007e-18	chr20	63423899	63423900	KCNQ2;KCNQ2;KCNQ2;KCNQ2;KCNQ2;KCNQ2;KCNQ2;KCNQ2;KCNQ2;KCNQ2;RP11-358D14.3	protein_coding;protein_coding;protein_coding;protein_coding;protein_coding;protein_coding;protein_coding;protein_coding;protein_coding;protein_coding;antisense	ENST00000344462.7;ENST00000357249.5;ENST00000359125.5;ENST00000360480.6;ENST00000370224.4;ENST00000625514.1;ENST00000626839.1;ENST00000627221.1;ENST00000629241.1;ENST00000629676.1;ENST00000629794.1	48611;22893;48692;48607;48700;48657;48779;15770;48657;48657;1629	CGI:chr20:63421554-63421973	S_Shore
cg09081266	0.475771	0.808444	-0.332672	4.34706e-12	3.84343e-15	chr6	29397510	29397511	OR12D2;OR12D2;OR12D2;OR5V1	polymorphic_pseudogene;polymorphic_pseudogene;protein_coding;protein_coding	ENST00000623183.1;ENST00000623508.1;ENST00000383555.4;ENST00000377154.1	954;870;809;34458	CGI:chr6:29553333-29554056	.
cg16011217	0.407043	0.739694	-0.332651	2.75117e-14	4.31218e-17	chr1	152804906	152804907	LCE1B;LCE1C	protein_coding;protein_coding	ENST00000615904.1;ENST00000607093.1	67387;573	CGI:chr1:152515581-152515794	.
cg08215169	0.396045	0.728598	-0.332554	1.75235e-18	9.08626e-21	chr13	111492554	111492555	.	.	.	.	CGI:chr13:111519885-111520094	.
cg02052265	0.319397	0.651845	-0.332448	1.21604e-19	8.90406e-22	chr1	247548808	247548809	GCSAML;GCSAML;GCSAML;GCSAML;GCSAML;GCSAML;GCSAML;GCSAML;GCSAML;GCSAML;GCSAML	protein_coding;protein_coding;protein_coding;protein_coding;protein_coding;protein_coding;protein_coding;protein_coding;protein_coding;protein_coding;protein_coding	ENST00000366488.4;ENST00000366489.4;ENST00000366491.5;ENST00000463359.4;ENST00000526896.4;ENST00000527084.4;ENST00000527541.4;ENST00000529512.4;ENST00000531662.1;ENST00000536561.4;ENST00000623578.2	-281;41687;41692;30375;41683;41749;41734;30355;30333;41749;30355	CGI:chr1:247530733-247531199	.
cg13954965	0.589164	0.921589	-0.332425	7.32969e-09	3.07915e-12	chr2	132417619	132417620	GPR39;GPR39	protein_coding;protein_coding	ENST00000329321.3;ENST00000622084.1	1044;575	CGI:chr2:132417587-132417871	Island
cg25423174	0.395815	0.728239	-0.332425	3.00884e-16	8.20806e-19	chr3	12194803	12194804	.	.	.	.	CGI:chr3:12158683-12159032	.
cg26610167	0.436091	0.768447	-0.332356	1.23718e-16	3.73932e-19	chr19	55209449	55209450	PTPRH;PTPRH;PTPRH;PTPRH	protein_coding;protein_coding;protein_coding;protein_coding	ENST00000263434.5;ENST00000376350.6;ENST00000587662.1;ENST00000588559.4	8;8;52;58	CGI:chr19:55216977-55217261	.
cg07696099	0.281398	0.613741	-0.332343	1.1234e-25	6.83809e-27	chr8	132561562	132561563	HPYR1	lincRNA	ENST00000520457.1	-82	CGI:chr8:132479864-132481339	.
cg23708209	0.337443	0.669768	-0.332325	1.66791e-20	1.5735e-22	chr15	88300668	88300669	.	.	.	.	CGI:chr15:88256291-88257786	.
cg03432085	0.519159	0.851421	-0.332262	4.33936e-13	4.97796e-16	chr11	126652019	126652020	KIRREL3;KIRREL3;KIRREL3;KIRREL3;KIRREL3;KIRREL3;RP11-115C10.1	protein_coding;protein_coding;protein_coding;protein_coding;protein_coding;protein_coding;antisense	ENST00000525144.5;ENST00000525704.2;ENST00000529097.5;ENST00000533026.5;ENST00000547738.4;ENST00000549874.1;ENST00000550747.1	348741;348792;348502;351442;349147;348752;-834	CGI:chr11:126416556-126416975	.
cg02283042	0.412712	0.74493	-0.332218	7.19411e-19	4.17223e-21	chr16	83166777	83166778	CDH13;CDH13;CDH13;CDH13;CDH13;CDH13;CDH13;CDH13;CDH13	protein_coding;protein_coding;protein_coding;protein_coding;protein_coding;protein_coding;protein_coding;protein_coding;protein_coding	ENST00000268613.13;ENST00000428848.6;ENST00000431540.6;ENST00000539548.5;ENST00000565636.4;ENST00000566620.4;ENST00000567109.4;ENST00000569454.1;ENST00000622885.3	539811;539806;539806;539806;539806;308423;539973;240818;308420	CGI:chr16:82627046-82628208	.
cg08330217	0.39159	0.723795	-0.332205	2.14107e-15	4.61012e-18	chr20	59407914	59407915	.	.	.	.	CGI:chr20:59403746-59404020	S_Shelf
cg18119644	0.594609	0.926786	-0.332177	1.73116e-09	8.26287e-13	chr11	1447882	1447883	BRSK2;BRSK2;BRSK2;BRSK2;BRSK2;BRSK2;BRSK2;BRSK2	protein_coding;protein_coding;protein_coding;protein_coding;protein_coding;protein_coding;protein_coding;protein_coding	ENST00000308219.12;ENST00000382179.4;ENST00000526678.4;ENST00000528710.4;ENST00000528841.4;ENST00000529433.4;ENST00000529951.4;ENST00000531197.4	57982;36729;57596;37438;57980;57980;7082;57980	CGI:chr11:1448803-1449158	N_Shore
cg16422365	0.350284	0.682447	-0.332163	5.22721e-26	3.5873e-27	chr14	105575496	105575497	.	.	.	.	CGI:chr14:105574091-105574296	S_Shore
cg08519008	0.501686	0.833818	-0.332132	1.77304e-13	2.24924e-16	chr11	123944495	123944496	OR6T1	protein_coding	ENST00000321252.2	-621	CGI:chr11:123741190-123741837	.
cg06456717	0.366644	0.69872	-0.332075	5.53735e-14	7.98547e-17	chr18	12092943	12092944	ANKRD62;RP11-815J4.5	protein_coding;processed_pseudogene	ENST00000587848.2;ENST00000589352.1	-911;199	CGI:chr18:12093608-12093843	N_Shore
cg06513470	0.474028	0.806086	-0.332058	1.33757e-14	2.28533e-17	chr16	90000361	90000362	AFG3L1P;AFG3L1P;AFG3L1P;AFG3L1P	unitary_pseudogene;unitary_pseudogene;unitary_pseudogene;unitary_pseudogene	ENST00000355531.6;ENST00000388970.6;ENST00000454997.1;ENST00000557444.4	11864;22666;1754;27729	CGI:chr16:89999909-90000235	S_Shore
cg25101380	0.526577	0.85852	-0.331943	1.84841e-14	3.03872e-17	chr2	2601822	2601823	.	.	.	.	CGI:chr2:2650336-2650586	.
cg14933439	0.385876	0.717813	-0.331937	7.50513e-19	4.31684e-21	chr16	49373883	49373884	C16orf78	protein_coding	ENST00000299191.3	59	CGI:chr16:49407062-49407390	.
cg13408605	0.390181	0.722095	-0.331914	2.20955e-16	6.23161e-19	chr20	1659170	1659171	SIRPG;SIRPG;SIRPG;SIRPG	protein_coding;protein_coding;protein_coding;protein_coding	ENST00000216927.4;ENST00000303415.6;ENST00000344103.7;ENST00000381583.5	-1455;-1390;-1413;-1390	CGI:chr20:1735684-1736007	.
cg03478444	0.472408	0.804319	-0.331911	7.72512e-14	1.07102e-16	chr16	49373554	49373555	C16orf78	protein_coding	ENST00000299191.3	-270	CGI:chr16:49407062-49407390	.
cg20799165	0.353095	0.685	-0.331905	5.10421e-15	9.81309e-18	chr8	135289911	135289912	RP11-452N4.1;RP11-452N4.1;RP11-452N4.1	lincRNA;lincRNA;lincRNA	ENST00000520101.4;ENST00000522279.4;ENST00000524070.1	55674;55779;55673	CGI:chr8:135456696-135457308	.
cg14382249	0.523651	0.855543	-0.331892	4.47524e-10	2.42523e-13	chr2	820806	820807	LINC01115;LINC01115	lincRNA;lincRNA	ENST00000415700.1;ENST00000621134.3	47386;47621	CGI:chr2:868244-869405	.
cg27519145	0.474484	0.806367	-0.331883	9.91631e-16	2.35143e-18	chr1	166070398	166070399	FAM78B;FAM78B;FAM78B;FAM78B;FAM78B	protein_coding;protein_coding;protein_coding;protein_coding;protein_coding	ENST00000338353.3;ENST00000354422.3;ENST00000435676.2;ENST00000441649.1;ENST00000456900.1	96572;96318;95828;95837;95984	CGI:chr1:166165021-166167211	.
cg12584111	0.567003	0.898822	-0.331819	3.41908e-09	1.53057e-12	chr7	142243339	142243340	MOXD2P;MOXD2P	transcribed_unprocessed_pseudogene;transcribed_unprocessed_pseudogene	ENST00000460233.4;ENST00000477615.1	3729;446	CGI:chr7:141738204-141738593	.
cg26090020	0.490852	0.822409	-0.331556	3.69778e-14	5.62095e-17	chr17	34576698	34576699	C17orf102	lincRNA	ENST00000623254.1	2672	CGI:chr17:34578946-34581852	N_Shelf
cg22713752	0.446031	0.777578	-0.331547	1.19466e-15	2.76725e-18	chr15	80342883	80342884	LINC00927;LINC00927;LINC00927;LINC00927	lincRNA;lincRNA;lincRNA;lincRNA	ENST00000558244.1;ENST00000558578.1;ENST00000558913.4;ENST00000561432.1	-1077;-1109;-1114;-1115	CGI:chr15:80403734-80405051	.
cg15826426	0.423584	0.7551	-0.331516	3.66408e-15	7.35548e-18	chr15	96782531	96782532	SPATA8;SPATA8;SPATA8;SPATA8;SPATA8-AS1;SPATA8-AS1	protein_coding;protein_coding;protein_coding;protein_coding;antisense;antisense	ENST00000328504.3;ENST00000558553.1;ENST00000560327.1;ENST00000561002.1;ENST00000558722.1;ENST00000560888.4	-859;-944;-957;-919;782;-876	CGI:chr15:96416111-96417301	.
cg12302182	0.48672	0.818189	-0.331468	1.59313e-15	3.56975e-18	chr15	94653232	94653233	.	.	.	.	CGI:chr15:94844772-94845407	.
cg00573410	0.352846	0.68421	-0.331364	2.14617e-17	8.18702e-20	chr2	883778	883779	.	.	.	.	CGI:chr2:868244-869405	.
cg10534479	0.394439	0.7258	-0.331361	2.60965e-15	5.48081e-18	chr5	166771687	166771688	.	.	.	.	CGI:chr5:166978479-166978687	.
cg02578087	0.171911	0.503129	-0.331218	1.66649e-24	6.55361e-26	chr3	8629675	8629676	SSUH2;SSUH2;SSUH2;SSUH2;SSUH2;SSUH2;SSUH2;SSUH2;SSUH2;SSUH2	protein_coding;protein_coding;protein_coding;protein_coding;protein_coding;protein_coding;protein_coding;protein_coding;protein_coding;protein_coding	ENST00000317371.7;ENST00000341795.6;ENST00000413305.4;ENST00000415132.4;ENST00000420394.4;ENST00000435138.4;ENST00000455157.5;ENST00000492435.1;ENST00000495366.4;ENST00000544814.4	52397;22400;15120;29292;22387;115362;47734;4041;10341;15124	CGI:chr3:8501515-8501893	.
cg14851578	0.413913	0.74507	-0.331156	0.00719367	2.05332e-06	chr14	105720855	105720856	IGHG1	IG_C_gene	ENST00000618756.3	817490	CGI:chr14:105721791-105722344	N_Shore
cg00232831	0.453998	0.785138	-0.331139	2.29152e-14	3.66643e-17	chr2	160257345	160257346	ITGB6	protein_coding	ENST00000485635.1	14544	CGI:chr2:160269853-160270407	.
cg01824948	0.631743	0.962806	-0.331064	3.63491e-09	1.61932e-12	chr14	101590926	101590927	.	.	.	.	CGI:chr14:101587531-101587826	S_Shelf
cg24310126	0.429086	0.760149	-0.331063	5.99314e-15	1.13078e-17	chr10	122755195	122755196	DMBT1P1	transcribed_processed_pseudogene	ENST00000439464.5	-1500	CGI:chr10:122818610-122818927	.
cg01191058	0.599615	0.930678	-0.331062	1.17428e-09	5.80875e-13	chr16	88982025	88982026	.	.	.	.	CGI:chr16:88967652-88967885	.
cg27226238	0.517005	0.848054	-0.331049	5.34e-13	5.99231e-16	chr2	79138487	79138488	REG1P;REG1P;REG1P;REG1P;REG1P;REG1P;REG1P	transcribed_unprocessed_pseudogene;transcribed_unprocessed_pseudogene;transcribed_unprocessed_pseudogene;transcribed_unprocessed_pseudogene;transcribed_unprocessed_pseudogene;transcribed_unprocessed_pseudogene;transcribed_unprocessed_pseudogene	ENST00000377435.7;ENST00000414597.4;ENST00000434852.1;ENST00000443710.1;ENST00000444841.4;ENST00000447469.4;ENST00000450249.4	-59;-117;-59;-117;-59;-456;-59	CGI:chr2:78993066-78993466	.
cg15305070	0.628151	0.959033	-0.330883	7.85596e-09	3.28289e-12	chr2	930243	930244	.	.	.	.	CGI:chr2:950000-951600	.
cg22665383	0.44545	0.776243	-0.330793	2.10838e-14	3.40925e-17	chr11	55572485	55572486	OR4C16;OR4C16;OR4C16	polymorphic_pseudogene;polymorphic_pseudogene;protein_coding	ENST00000623907.1;ENST00000624571.1;ENST00000314634.3	356;356;356	CGI:chr11:55872592-55873609	.
cg15147833	0.299755	0.630505	-0.33075	1.40295e-17	5.60875e-20	chr1	247758370	247758371	OR1C1	protein_coding	ENST00000408896.3	37	CGI:chr1:247857028-247857950	.
cg10730165	0.552568	0.883282	-0.330714	1.70166e-12	1.66433e-15	chr7	142656526	142656527	TRBV24-1	TR_V_gene	ENST00000390397.2	-176	CGI:chr7:142796879-142797564	.
cg02691745	0.504713	0.835409	-0.330695	6.49163e-14	9.18751e-17	chr14	101022151	101022152	MIR379;MIR411	miRNA;miRNA	ENST00000362218.4;ENST00000362239.3	99;-1169	CGI:chr14:101065306-101066047	.
cg07347148	0.414252	0.744863	-0.330611	3.66587e-11	2.56483e-14	chr1	167817564	167817565	ADCY10;ADCY10;ADCY10;ADCY10	protein_coding;protein_coding;protein_coding;protein_coding	ENST00000367848.1;ENST00000367851.7;ENST00000485964.4;ENST00000545172.4	96539;96539;30926;96652	CGI:chr1:167820158-167820409	N_Shelf
cg16937902	0.594984	0.925543	-0.330559	1.6874e-10	1.008e-13	chr12	130280861	130280862	.	.	.	.	CGI:chr12:130337200-130339538	.
cg16425489	0.506938	0.837449	-0.330511	6.25425e-14	8.88851e-17	chr5	170378579	170378580	KCNIP1;KCNIP1;KCNIP1;KCNMB1	protein_coding;protein_coding;protein_coding;protein_coding	ENST00000377360.7;ENST00000517344.1;ENST00000518527.1;ENST00000274629.7	25091;24889;25091;11099	CGI:chr5:170503865-170504467	.
cg11902424	0.468519	0.798964	-0.330445	1.70581e-13	2.17222e-16	chr5	2252881	2252882	.	.	.	.	CGI:chr5:2180137-2180353	.
cg02550537	0.503921	0.834361	-0.33044	1.09784e-11	8.71697e-15	chr15	25204984	25204985	SNHG14;SNHG14;SNHG14;SNORD115-20	processed_transcript;processed_transcript;processed_transcript;snoRNA	ENST00000424208.4;ENST00000424333.4;ENST00000450809.1;ENST00000365099.1	23140;7555;-1097;-1279	CGI:chr15:25438248-25439268	.
cg02147009	0.503043	0.833472	-0.330429	1.82873e-12	1.77547e-15	chr16	20440448	20440449	ACSM5;CTD-2194A8.2	protein_coding;antisense	ENST00000331849.7;ENST00000574654.1	30913;1071	CGI:chr16:20348445-20349176	.
cg23299254	0.450024	0.78044	-0.330416	2.53442e-09	1.16632e-12	chr8	143934789	143934790	PLEC;PLEC;PLEC;PLEC;PLEC;PLEC;PLEC;PLEC;PLEC;PLEC	protein_coding;protein_coding;protein_coding;protein_coding;protein_coding;protein_coding;protein_coding;protein_coding;protein_coding;protein_coding	ENST00000322810.7;ENST00000345136.6;ENST00000354589.6;ENST00000354958.5;ENST00000356346.6;ENST00000357649.5;ENST00000398774.5;ENST00000436759.5;ENST00000527096.4;ENST00000528025.4	16088;4802;9170;19132;38741;7736;9949;41946;40581;40587	CGI:chr8:143934740-143935239	Island
cg14958969	0.413635	0.744046	-0.330411	8.59454e-11	5.50126e-14	chr2	1939042	1939043	MYT1L;MYT1L	protein_coding;protein_coding	ENST00000399161.5;ENST00000428368.5	392153;392075	CGI:chr2:1937296-1937788	S_Shore
cg16518348	0.437465	0.76784	-0.330375	2.63737e-13	3.18578e-16	chr8	1333530	1333531	.	.	.	.	CGI:chr8:1315257-1318172	.
cg16013670	0.395563	0.725911	-0.330348	8.38521e-14	1.15249e-16	chr1	241640873	241640874	OPN3;OPN3;OPN3;OPN3;OPN3	protein_coding;protein_coding;protein_coding;protein_coding;protein_coding	ENST00000366554.2;ENST00000463155.4;ENST00000469376.4;ENST00000478849.1;ENST00000490673.4	-511;36504;-532;-662;-517	CGI:chr1:241640245-241640590	S_Shore
cg12493906	0.484649	0.81498	-0.330331	8.52268e-14	1.17024e-16	chr11	4988081	4988082	MMP26;MMP26;MMP26	protein_coding;protein_coding;protein_coding	ENST00000300762.1;ENST00000380390.4;ENST00000477339.4	-114;220810;283153	CGI:chr11:4607868-4608300	.
cg16565154	0.306256	0.636571	-0.330314	1.24528e-13	1.64533e-16	chr1	151156586	151156587	SCNM1;TNFAIP8L2	protein_coding;protein_coding	ENST00000602841.4;ENST00000368910.3	-79;-44	CGI:chr1:151145573-151146897	.
cg09508275	0.401436	0.731741	-0.330305	1.61373e-15	3.61129e-18	chr11	56122798	56122799	OR8H3	protein_coding	ENST00000313472.3	424	CGI:chr11:55874234-55874644	.
cg25636481	0.439232	0.769519	-0.330287	5.64595e-12	4.85524e-15	chr6	33273633	33273634	RPS18;RPS18;RPS18;RPS18;RPS18;RPS18	protein_coding;protein_coding;protein_coding;protein_coding;protein_coding;protein_coding	ENST00000439602.5;ENST00000474626.4;ENST00000474973.4;ENST00000476222.4;ENST00000490191.4;ENST00000496813.4	1622;1544;1557;1536;1500;1533	CGI:chr6:33271549-33272322	S_Shore
cg24775180	0.544597	0.874861	-0.330264	3.47543e-10	1.92773e-13	chr12	131939154	131939155	PUS1;PUS1;PUS1;PUS1;PUS1;PUS1;PUS1	protein_coding;protein_coding;protein_coding;protein_coding;protein_coding;protein_coding;protein_coding	ENST00000322060.8;ENST00000376649.6;ENST00000443358.5;ENST00000535067.4;ENST00000537484.1;ENST00000538037.4;ENST00000542167.2	9911;9930;9953;9398;9388;9871;9877	CGI:chr12:131944983-131945194	.
cg13026772	0.413556	0.743764	-0.330208	2.25648e-16	6.34862e-19	chr11	125228636	125228637	PKNOX2;PKNOX2;PKNOX2;PKNOX2;PKNOX2;PKNOX2;PKNOX2;PKNOX2;PKNOX2	protein_coding;protein_coding;protein_coding;protein_coding;protein_coding;protein_coding;protein_coding;protein_coding;protein_coding	ENST00000298282.12;ENST00000527238.4;ENST00000530517.4;ENST00000531116.4;ENST00000531212.4;ENST00000532623.4;ENST00000557814.4;ENST00000559662.4;ENST00000561399.4	63929;63900;63948;63940;44448;63881;63907;63909;63883	CGI:chr11:125165039-125166779	.
cg18707501	0.466854	0.797005	-0.330151	3.97859e-09	1.75921e-12	chr15	26615630	26615631	GABRB3;GABRB3;GABRB3;GABRB3;GABRB3;GABRB3;GABRB3;GABRB3;GABRB3;GABRB3;GABRB3;GABRB3;GABRB3	protein_coding;protein_coding;protein_coding;protein_coding;protein_coding;protein_coding;protein_coding;protein_coding;protein_coding;protein_coding;protein_coding;protein_coding;protein_coding	ENST00000299267.7;ENST00000311550.8;ENST00000400188.6;ENST00000541819.5;ENST00000545868.4;ENST00000554556.4;ENST00000555094.4;ENST00000555632.4;ENST00000556166.2;ENST00000556636.4;ENST00000621499.1;ENST00000622697.3;ENST00000628124.1	158159;157445;13461;323910;151607;157428;101136;157385;13549;5777;88;157447;101136	CGI:chr15:26628950-26629381	.
cg07804289	0.404509	0.734605	-0.330095	3.29575e-11	2.33151e-14	chr1	153142214	153142215	.	.	.	.	CGI:chr1:153260996-153261837	.
cg22304522	0.405105	0.735162	-0.330057	1.02326e-14	1.8056e-17	chr8	130901791	130901792	ADCY8;ADCY8	protein_coding;protein_coding	ENST00000286355.8;ENST00000377928.6	140636;138543	CGI:chr8:131040003-131042503	.
cg17256609	0.476177	0.806217	-0.33004	8.88363e-13	9.36668e-16	chr8	41785857	41785858	ANK1;ANK1;ANK1	protein_coding;protein_coding;protein_coding	ENST00000265709.11;ENST00000289734.10;ENST00000347528.7	110906;11766;11766	CGI:chr8:41797357-41798466	.
cg02878382	0.437429	0.767445	-0.330016	5.70978e-17	1.91145e-19	chr14	104199365	104199366	.	.	.	.	CGI:chr14:104179620-104180141	.
cg18637486	0.588056	0.918071	-0.330015	5.37497e-13	6.02479e-16	chr17	81125977	81125978	AATK;AATK;AATK;AATK;AATK;AATK;AC115099.1;MIR657	protein_coding;protein_coding;protein_coding;protein_coding;protein_coding;protein_coding;miRNA;miRNA	ENST00000326724.7;ENST00000374792.5;ENST00000417379.4;ENST00000572339.4;ENST00000573441.1;ENST00000573469.1;ENST00000390137.3;ENST00000385003.1	40041;40096;5972;2912;-962;2924;2;-603	CGI:chr17:81128948-81129170	N_Shelf
cg25708982	0.406892	0.73687	-0.329978	9.80982e-05	2.81279e-08	chr13	112241117	112241118	.	.	.	.	CGI:chr13:112241113-112241394	Island
cg22103414	0.423707	0.753642	-0.329935	2.82207e-17	1.03427e-19	chr8	6780561	6780562	.	.	.	.	CGI:chr8:6806556-6806835	.
cg01145686	0.444172	0.774054	-0.329881	1.99913e-15	4.35812e-18	chr2	501496	501497	.	.	.	.	CGI:chr2:502994-503502	N_Shore
cg20018806	0.391179	0.720978	-0.329799	3.84646e-15	7.68143e-18	chr11	59866401	59866402	TCN1;TCN1;TCN1	protein_coding;protein_coding;protein_coding	ENST00000257264.3;ENST00000532419.4;ENST00000534531.1	175;89;71	CGI:chr11:59898106-59898384	.
cg11323650	0.360208	0.689707	-0.329499	1.31881e-16	3.95361e-19	chr11	56137770	56137771	OR8J3	protein_coding	ENST00000301529.1	-51	CGI:chr11:55874234-55874644	.
cg06119874	0.532245	0.861728	-0.329484	1.23476e-10	7.61727e-14	chr1	207052079	207052080	C4BPB;PFKFB2;PFKFB2;PFKFB2;PFKFB2;PFKFB2;PFKFB2;PFKFB2;YOD1;YOD1	protein_coding;protein_coding;protein_coding;protein_coding;protein_coding;protein_coding;protein_coding;protein_coding;protein_coding;protein_coding	ENST00000451804.5;ENST00000367079.3;ENST00000367080.6;ENST00000411990.5;ENST00000464777.4;ENST00000468857.1;ENST00000545806.4;ENST00000618513.3;ENST00000315927.7;ENST00000367084.1	45233;-1233;-1182;17662;-1197;-1205;17712;17662;-1001;902	CGI:chr1:207052936-207053497	N_Shore
cg00219321	0.519727	0.849194	-0.329467	3.87585e-13	4.50007e-16	chr5	153939087	153939088	.	.	.	.	CGI:chr5:154038623-154039109	.
cg07010146	0.389048	0.718489	-0.329441	2.60144e-20	2.29346e-22	chr10	103479448	103479449	CALHM3	protein_coding	ENST00000369783.4	-207	CGI:chr10:103473164-103473699	.
cg24700823	0.407793	0.73715	-0.329357	1.72712e-16	5.00407e-19	chr15	26202144	26202145	.	.	.	.	CGI:chr15:26082348-26082749	.
cg00687073	0.320113	0.649456	-0.329343	7.4725e-22	1.12248e-23	chr8	1004552	1004553	ERICH1-AS1;ERICH1-AS1;ERICH1-AS1	antisense;antisense;antisense	ENST00000522092.4;ENST00000524139.4;ENST00000578889.1	266900;121353;121223	CGI:chr8:1006288-1007205	N_Shore
cg17410660	0.416447	0.745775	-0.329328	1.29682e-15	2.97728e-18	chr11	124936612	124936613	HEPACAM;HEPACAM	protein_coding;protein_coding	ENST00000298251.4;ENST00000528971.1	-199;-199	CGI:chr11:124920918-124921458	.
cg18857655	0.576194	0.90542	-0.329227	5.19715e-11	3.51396e-14	chr2	238914446	238914447	.	.	.	.	CGI:chr2:238893635-238893887	.
cg08877269	0.524782	0.853968	-0.329186	2.19609e-11	1.61971e-14	chr8	1422070	1422071	.	.	.	.	CGI:chr8:1417008-1417337	.
cg06003388	0.415534	0.744675	-0.329141	4.64506e-14	6.86849e-17	chr16	59329539	59329540	.	.	.	.	CGI:chr16:59754888-59755168	.
cg01421252	0.285502	0.614588	-0.329086	2.60164e-23	6.32343e-25	chr16	5540676	5540677	RP11-420N3.2;RP11-420N3.3	lincRNA;processed_transcript	ENST00000585867.2;ENST00000569895.3	300860;300873	CGI:chr16:5239581-5240385	.
cg07944396	0.482569	0.811637	-0.329068	1.29383e-13	1.70081e-16	chr16	7332513	7332514	RBFOX1;RBFOX1;RBFOX1;RBFOX1;RBFOX1;RBFOX1;RBFOX1;RBFOX1;RBFOX1;RBFOX1;RBFOX1;RBFOX1;RBFOX1;RBFOX1	protein_coding;protein_coding;protein_coding;protein_coding;protein_coding;protein_coding;protein_coding;protein_coding;protein_coding;protein_coding;protein_coding;protein_coding;protein_coding;protein_coding	ENST00000311745.8;ENST00000340209.7;ENST00000355637.7;ENST00000422070.7;ENST00000436368.5;ENST00000535565.5;ENST00000547338.4;ENST00000547372.4;ENST00000547605.4;ENST00000550418.4;ENST00000551752.4;ENST00000552089.4;ENST00000553186.4;ENST00000620507.3	-238;-238;-238;1312809;-238;849333;558703;1312919;1313418;1313381;848719;849126;1313381;-238	CGI:chr16:7304332-7304607	.
cg17570276	0.330853	0.659905	-0.329052	9.81788e-13	1.02254e-15	chr7	6059619	6059620	EIF2AK1;EIF2AK1;EIF2AK1;EIF2AK1;EIF2AK1	protein_coding;protein_coding;protein_coding;protein_coding;protein_coding	ENST00000199389.9;ENST00000431744.4;ENST00000446699.1;ENST00000461493.1;ENST00000463213.4	-388;-454;-454;-443;-562	CGI:chr7:6058793-6059351	S_Shore
cg07611933	0.526453	0.855485	-0.329032	1.71545e-16	4.98057e-19	chr16	2723244	2723245	.	.	.	.	CGI:chr16:2720837-2721404	S_Shore
cg21660861	0.439366	0.768299	-0.328933	3.90708e-15	7.78524e-18	chr7	16661334	16661335	BZW2;BZW2;BZW2;BZW2;BZW2;BZW2;BZW2;BZW2;BZW2;BZW2;BZW2;BZW2;BZW2	protein_coding;protein_coding;protein_coding;protein_coding;protein_coding;protein_coding;protein_coding;protein_coding;protein_coding;protein_coding;protein_coding;protein_coding;protein_coding	ENST00000258761.6;ENST00000405202.4;ENST00000415365.4;ENST00000430000.1;ENST00000432311.4;ENST00000433922.5;ENST00000436868.4;ENST00000437745.4;ENST00000438834.4;ENST00000446596.4;ENST00000452975.5;ENST00000480517.4;ENST00000630952.1	15202;15138;15202;-800;15173;15199;15159;15173;61;110;106;119;15199	CGI:chr7:16644614-16646739	.
cg02516330	0.427515	0.756417	-0.328902	2.56489e-18	1.28336e-20	chr8	20599515	20599516	.	.	.	.	CGI:chr8:20303300-20304174	.
cg13991631	0.4452	0.774095	-0.328895	1.27728e-15	2.93917e-18	chr5	177379389	177379390	SLC34A1	protein_coding	ENST00000504577.4	153	CGI:chr5:177366958-177367840	.
cg01489419	0.462924	0.791759	-0.328836	1.44049e-14	2.43915e-17	chr16	26281736	26281737	.	.	.	.	CGI:chr16:25691634-25693310	.
cg20668321	0.478646	0.807415	-0.328769	3.31657e-15	6.75669e-18	chr5	153813283	153813284	GRIA1;GRIA1	protein_coding;protein_coding	ENST00000285900.8;ENST00000518783.1	322736;321110	CGI:chr5:154038623-154039109	.
cg06448603	0.481423	0.810104	-0.328681	1.98168e-15	4.32277e-18	chr5	33658979	33658980	ADAMTS12;ADAMTS12;ADAMTS12	protein_coding;protein_coding;protein_coding	ENST00000352040.6;ENST00000504582.4;ENST00000504830.4	232963;181334;233214	CGI:chr5:33501949-33502258	.
cg20159095	0.524098	0.852751	-0.328653	6.18851e-10	3.24661e-13	chr7	157549849	157549850	PTPRN2;PTPRN2;PTPRN2;PTPRN2	protein_coding;protein_coding;protein_coding;protein_coding	ENST00000389413.6;ENST00000389416.7;ENST00000389418.7;ENST00000409483.4	1037925;1037863;1037831;1037940	CGI:chr7:157553919-157554375	.
cg06126225	0.617174	0.945822	-0.328648	3.25664e-11	2.3064e-14	chr12	127833615	127833616	.	.	.	.	CGI:chr12:127761047-127761291	.
cg18017531	0.473303	0.801863	-0.32856	1.79309e-12	1.74328e-15	chr3	15064013	15064014	MRPS25;MRPS25;MRPS25;MRPS25;MRPS25	protein_coding;protein_coding;protein_coding;protein_coding;protein_coding	ENST00000253686.5;ENST00000420267.4;ENST00000444840.5;ENST00000447299.1;ENST00000449354.5	1323;1299;1305;1288;1248	CGI:chr3:15064785-15065464	N_Shore
cg05988964	0.461759	0.790304	-0.328545	2.26537e-11	1.66484e-14	chr8	139617316	139617317	KCNK9;KCNK9;KCNK9;KCNK9	protein_coding;protein_coding;protein_coding;protein_coding	ENST00000303015.2;ENST00000519923.1;ENST00000522317.4;ENST00000523477.1	85683;-1268;85726;-310	CGI:chr8:139618853-139619089	N_Shore
cg16755214	0.337397	0.66591	-0.328513	5.72699e-18	2.57807e-20	chr14	54253628	54253629	.	.	.	.	CGI:chr14:54396705-54397536	.
cg16543823	0.554765	0.883263	-0.328498	1.17917e-09	5.83088e-13	chr7	52668168	52668169	.	.	.	.	CGI:chr7:53035582-53036266	.
cg00159780	0.578897	0.907387	-0.32849	2.72875e-15	5.69507e-18	*	-1	-1	.	.	.	.	.	.
cg02736228	0.39748	0.725916	-0.328436	5.45063e-17	1.83856e-19	chr1	204377515	204377516	PLEKHA6;RP11-739N20.2	protein_coding;antisense	ENST00000564627.1;ENST00000443515.1	151;-336	CGI:chr1:204377604-204378302	N_Shore
cg07320941	0.504898	0.833316	-0.328418	6.64853e-15	1.23908e-17	chr18	78879319	78879320	.	.	.	.	CGI:chr18:78879260-78879744	Island
cg01827426	0.361884	0.690003	-0.328119	2.07783e-22	3.76876e-24	chr5	1752553	1752554	.	.	.	.	CGI:chr5:1746254-1746935	.
cg19509988	0.464592	0.792696	-0.328104	1.89e-11	1.41755e-14	chr7	157667965	157667966	PTPRN2;PTPRN2;PTPRN2;PTPRN2	protein_coding;protein_coding;protein_coding;protein_coding	ENST00000389413.6;ENST00000389416.7;ENST00000389418.7;ENST00000409483.4	919809;919747;919715;919824	CGI:chr7:157663097-157663352	.
cg10222925	0.502192	0.830227	-0.328035	2.09343e-12	2.00301e-15	chr8	87872958	87872959	DCAF4L2	protein_coding	ENST00000319675.4	1111	CGI:chr8:87873943-87874217	N_Shore
cg19790884	0.469254	0.797266	-0.328011	1.09728e-13	1.4688e-16	chr22	49631658	49631659	C22orf34;C22orf34;C22orf34;C22orf34	lincRNA;lincRNA;lincRNA;lincRNA	ENST00000400023.4;ENST00000405854.4;ENST00000414287.4;ENST00000416411.1	25885;25773;25847;25800	CGI:chr22:49631437-49632767	Island
cg02048922	0.193029	0.521034	-0.328005	7.43349e-15	1.36933e-17	chr8	142465497	142465498	BAI1;BAI1;BAI1	protein_coding;protein_coding;protein_coding	ENST00000323289.6;ENST00000517894.4;ENST00000521208.4	1480;16066;15817	CGI:chr8:142464084-142465101	S_Shore
cg17881513	0.482195	0.810193	-0.327997	5.88393e-15	1.11288e-17	chr8	10860177	10860178	RP11-177H2.1	TEC	ENST00000624866.1	-740	CGI:chr8:10851904-10852270	.
cg18410316	0.462689	0.790628	-0.327938	2.7442e-12	2.54395e-15	chr6	31240011	31240012	.	.	.	.	CGI:chr6:31271075-31272343	.
cg07451946	0.509745	0.837652	-0.327906	1.10012e-12	1.13011e-15	chr10	2295279	2295280	.	.	.	.	CGI:chr10:2315054-2315277	.
cg02570298	0.431138	0.759036	-0.327898	1.76546e-12	1.72e-15	chr13	53044691	53044692	OLFM4	protein_coding	ENST00000219022.2	15931	CGI:chr13:53200129-53202210	.
cg16501892	0.472428	0.800235	-0.327807	1.66952e-13	2.13299e-16	chr18	46560611	46560612	LOXHD1;LOXHD1;LOXHD1;LOXHD1;LOXHD1;LOXHD1	protein_coding;protein_coding;protein_coding;protein_coding;protein_coding;protein_coding	ENST00000300591.9;ENST00000335730.5;ENST00000419859.1;ENST00000441551.5;ENST00000536736.4;ENST00000582408.4	-1298;41053;-1321;96423;96423;-1318	CGI:chr18:46560399-46560612	Island
cg12423553	0.529744	0.857528	-0.327784	8.29216e-11	5.32768e-14	chr21	46121729	46121730	COL6A2;COL6A2;COL6A2;COL6A2;COL6A2	protein_coding;protein_coding;protein_coding;protein_coding;protein_coding	ENST00000300527.7;ENST00000310645.8;ENST00000397763.4;ENST00000409416.4;ENST00000413758.1	23631;23609;10278;10314;1168	CGI:chr21:46125273-46125518	N_Shelf
cg10815657	0.299044	0.626826	-0.327782	9.03411e-14	1.23489e-16	chr19	289902	289903	PPAP2C;PPAP2C;PPAP2C;PPAP2C;PPAP2C;PPAP2C	protein_coding;protein_coding;protein_coding;protein_coding;protein_coding;protein_coding	ENST00000269812.6;ENST00000327790.6;ENST00000434325.5;ENST00000589672.1;ENST00000591572.2;ENST00000621795.1	1492;1284;1603;-1371;1481;-1364	CGI:chr19:290594-292249	N_Shore
cg04739648	0.416336	0.744031	-0.327695	1.35921e-12	1.36663e-15	chr5	25907415	25907416	.	.	.	.	CGI:chr5:25909233-25909542	N_Shore
cg26311804	0.517248	0.844926	-0.327678	5.59721e-12	4.8151e-15	chr11	133285408	133285409	OPCML;OPCML	protein_coding;protein_coding	ENST00000524381.4;ENST00000529038.4	247112;246995	CGI:chr11:133360989-133361750	.
cg21624833	0.441963	0.769639	-0.327676	8.23626e-13	8.77932e-16	chr8	48199151	48199152	.	.	.	.	CGI:chr8:48260441-48260866	.
cg10552275	0.440681	0.768313	-0.327632	3.38357e-20	2.89902e-22	chr5	2003288	2003289	.	.	.	.	CGI:chr5:2007201-2007765	N_Shelf
cg03907855	0.581503	0.909079	-0.327576	1.11406e-14	1.94329e-17	chr8	1156401	1156402	CTD-2281E23.2	processed_transcript	ENST00000520524.4	51518	CGI:chr8:1155614-1156066	S_Shore
cg14159452	0.507239	0.834798	-0.327559	2.56899e-11	1.86506e-14	chr10	2083269	2083270	.	.	.	.	CGI:chr10:2315054-2315277	.
cg23401796	0.609281	0.9368	-0.327519	2.24573e-07	7.48969e-11	chr8	140238568	140238569	TRAPPC9;TRAPPC9;TRAPPC9;TRAPPC9;TRAPPC9;TRAPPC9;TRAPPC9	protein_coding;protein_coding;protein_coding;protein_coding;protein_coding;protein_coding;protein_coding	ENST00000389328.7;ENST00000438773.2;ENST00000517667.4;ENST00000518839.1;ENST00000520532.4;ENST00000520857.4;ENST00000521667.4	220012;219195;-74;24163;24164;212363;52684	CGI:chr8:140338741-140339096	.
cg00380428	0.387758	0.715273	-0.327515	1.93061e-14	3.15238e-17	chr17	79467505	79467506	RBFOX3;RBFOX3;RBFOX3	protein_coding;protein_coding;protein_coding	ENST00000580155.4;ENST00000583458.4;ENST00000584778.4	48644;15094;41364	CGI:chr17:79464163-79464564	S_Shelf
cg10948284	0.560047	0.887447	-0.3274	5.05914e-14	7.39177e-17	chr8	142801229	142801230	RP11-706C16.8	antisense	ENST00000510610.2	15854	CGI:chr8:142798178-142798390	S_Shelf
cg17840707	0.466293	0.793675	-0.327382	5.9222e-14	8.48626e-17	chr15	86407868	86407869	AGBL1;AGBL1	protein_coding;protein_coding	ENST00000421325.3;ENST00000441037.5	265856;265871	CGI:chr15:85840646-85840884	.
cg18740359	0.379235	0.706596	-0.327361	1.44906e-17	5.76658e-20	chr19	55881797	55881798	NLRP4;NLRP4;NLRP4	protein_coding;protein_coding;protein_coding	ENST00000301295.9;ENST00000587891.4;ENST00000589437.1	45218;24351;23099	CGI:chr19:55858049-55858303	.
cg01703246	0.591518	0.918848	-0.32733	1.9366e-10	1.13908e-13	chr8	2179228	2179229	.	.	.	.	CGI:chr8:2181660-2182153	N_Shelf
cg00160828	0.518437	0.845723	-0.327286	5.42327e-11	3.64766e-14	chr8	2691768	2691769	RP11-134O21.1;RP11-134O21.1;RP11-134O21.1;RP11-134O21.1	lincRNA;lincRNA;lincRNA;lincRNA	ENST00000517357.4;ENST00000517984.4;ENST00000519393.4;ENST00000523971.4	36652;36652;36622;36684	CGI:chr8:2561843-2562368	.
cg10818986	0.491243	0.818453	-0.32721	6.35033e-13	6.96745e-16	chr1	247919844	247919845	OR2T8	protein_coding	ENST00000319968.4	-1175	CGI:chr1:247937023-247937424	.
cg21451653	0.449429	0.776627	-0.327197	4.26677e-14	6.37897e-17	chr12	34399059	34399060	.	.	.	.	CGI:chr12:34350419-34350679	.
cg17267710	0.440199	0.767362	-0.327164	2.20144e-13	2.71735e-16	chr20	62564025	62564026	MIR1-1HG;MIR1-1HG;MIR133A2	antisense;antisense;miRNA	ENST00000370523.1;ENST00000624914.2;ENST00000347538.2	10463;13571;-888	CGI:chr20:62554379-62554696	.
cg10952063	0.505611	0.832712	-0.327101	3.08674e-15	6.34572e-18	chr8	1300696	1300697	CTD-2281E23.1	lincRNA	ENST00000617093.1	1912	CGI:chr8:1297411-1298205	S_Shelf
cg00044372	0.470893	0.797986	-0.327093	2.00266e-10	1.17311e-13	chr16	85037219	85037220	KIAA0513;KIAA0513	protein_coding;protein_coding	ENST00000258180.6;ENST00000538274.4	9467;9467	CGI:chr16:85027576-85027935	.
cg10025714	0.261409	0.588494	-0.327085	6.38813e-16	1.60448e-18	chr1	143656295	143656296	.	.	.	.	CGI:chr1:143654586-143654841	S_Shore
cg05280527	0.322264	0.649316	-0.327052	1.92958e-07	6.48754e-11	chr14	79862107	79862108	NRXN3;NRXN3;NRXN3;NRXN3;NRXN3	protein_coding;protein_coding;protein_coding;protein_coding;protein_coding	ENST00000281127.10;ENST00000428277.5;ENST00000554719.4;ENST00000555387.1;ENST00000557594.4	582693;582200;1458356;581843;582767	CGI:chr14:79861671-79861988	S_Shore
cg18531916	0.375986	0.703019	-0.327033	4.2662e-21	4.87862e-23	chr10	128326114	128326115	.	.	.	.	CGI:chr10:128286774-128287161	.
cg09108394	0.352445	0.679466	-0.327021	1.42729e-20	1.37807e-22	chr16	23838785	23838786	PRKCB;PRKCB;PRKCB;PRKCB	protein_coding;protein_coding;protein_coding;protein_coding	ENST00000303531.10;ENST00000321728.10;ENST00000498058.1;ENST00000498739.1	2760;2783;2702;1561	CGI:chr16:23835620-23836781	S_Shelf
cg02482718	0.402053	0.729061	-0.327007	2.08425e-09	9.7623e-13	chr1	4666699	4666700	AJAP1;AJAP1	protein_coding;protein_coding	ENST00000378190.6;ENST00000378191.4	11966;11653	CGI:chr1:4666516-4666807	Island
cg21041579	0.481052	0.807997	-0.326945	1.46651e-11	1.13057e-14	chr14	95441660	95441661	SYNE3;SYNE3;SYNE3;SYNE3	protein_coding;protein_coding;protein_coding;protein_coding	ENST00000334258.8;ENST00000554873.4;ENST00000555759.1;ENST00000557275.4	34177;14530;26197;34177	CGI:chr14:95516161-95517196	.
cg00666640	0.437831	0.764722	-0.326891	9.80691e-16	2.32864e-18	chr1	248295424	248295425	OR2T12	protein_coding	ENST00000317996.1	155	CGI:chr1:247937023-247937424	.
cg10622019	0.567362	0.89424	-0.326879	8.12809e-12	6.70239e-15	chr1	4161425	4161426	.	.	.	.	CGI:chr1:4161327-4161612	Island
cg06086990	0.49018	0.81705	-0.32687	2.16049e-15	4.6479e-18	chr21	30598609	30598610	KRTAP6-2	protein_coding	ENST00000334897.4	294	CGI:chr21:31251828-31252066	.
cg18196506	0.284521	0.611349	-0.326828	4.70774e-26	3.26279e-27	chr14	106873242	106873243	.	.	.	.	CGI:chr14:106812858-106813074	.
cg06607825	0.472585	0.79941	-0.326825	2.72888e-07	9.013e-11	chr11	19804254	19804255	NAV2;NAV2;NAV2;NAV2;NAV2;NAV2;NAV2	protein_coding;protein_coding;protein_coding;protein_coding;protein_coding;protein_coding;protein_coding	ENST00000349880.7;ENST00000360655.7;ENST00000396085.4;ENST00000396087.6;ENST00000527559.5;ENST00000534229.1;ENST00000540292.4	90887;453529;90918;90656;90918;26451;90918	CGI:chr11:19776991-19777403	.
cg05595134	0.4488	0.775594	-0.326794	1.80701e-14	2.97835e-17	chr8	54134695	54134696	MRPL15;MRPL15	protein_coding;protein_coding	ENST00000260102.7;ENST00000519831.4	-516;-583	CGI:chr8:54135145-54135445	N_Shore
cg06555227	0.421513	0.748297	-0.326784	8.99251e-15	1.61611e-17	chr7	157574287	157574288	PTPRN2;PTPRN2;PTPRN2;PTPRN2	protein_coding;protein_coding;protein_coding;protein_coding	ENST00000389413.6;ENST00000389416.7;ENST00000389418.7;ENST00000409483.4	1013487;1013425;1013393;1013502	CGI:chr7:157576428-157576702	N_Shelf
cg04902968	0.398488	0.72526	-0.326772	5.69619e-17	1.90873e-19	chr1	5710987	5710988	.	.	.	.	CGI:chr1:5711996-5712453	N_Shore
cg10452667	0.37904	0.70574	-0.3267	1.60731e-17	6.32799e-20	chr5	1767879	1767880	.	.	.	.	CGI:chr5:1768799-1769580	N_Shore
cg03326410	0.494136	0.820825	-0.326689	2.72668e-11	1.96953e-14	chr6	63441834	63441835	RP3-407E4.4	unprocessed_pseudogene	ENST00000402043.2	1067	CGI:chr6:63572246-63573831	.
cg12494529	0.468908	0.795547	-0.32664	5.49949e-15	1.04838e-17	chr10	1036492	1036493	IDI2-AS1;IDI2-AS1;IDI2-AS1;IDI2-AS1	antisense;antisense;antisense;antisense	ENST00000420381.4;ENST00000428780.2;ENST00000437374.4;ENST00000536039.2	13823;13823;13825;-332	CGI:chr10:1048397-1049654	.
cg18426908	0.464007	0.790618	-0.326611	2.09857e-15	4.54096e-18	chr10	128288885	128288886	LINC01163;LINC01163	lincRNA;lincRNA	ENST00000626518.1;ENST00000630252.1	107852;107748	CGI:chr10:128286774-128287161	S_Shore
cg17399417	0.476749	0.803343	-0.326594	1.32065e-13	1.73151e-16	chr12	132332153	132332154	RP13-895J2.8	TEC	ENST00000623871.1	147	CGI:chr12:132333867-132334216	N_Shore
cg26129110	0.42797	0.754503	-0.326533	6.51986e-13	7.12998e-16	chr5	7619870	7619871	ADCY2;ADCY2;ADCY2;ADCY2	protein_coding;protein_coding;protein_coding;protein_coding	ENST00000338316.7;ENST00000498598.1;ENST00000515681.1;ENST00000537121.4	223661;205205;8760;223598	CGI:chr5:7394873-7396547	.
cg08868915	0.385272	0.711641	-0.326369	2.82952e-16	7.76122e-19	chr1	247934604	247934605	OR2AJ1	protein_coding	ENST00000318244.3	834	CGI:chr1:247937023-247937424	N_Shelf
cg23626762	0.51629	0.842639	-0.326349	7.17138e-13	7.76123e-16	chr8	1335276	1335277	.	.	.	.	CGI:chr8:1350172-1352315	.
cg26860855	0.481466	0.807789	-0.326323	4.82382e-14	7.1058e-17	chr7	152921442	152921443	.	.	.	.	CGI:chr7:152924831-152925064	N_Shelf
cg11977100	0.301118	0.627389	-0.326271	1.44247e-10	8.75361e-14	chr1	247965890	247965891	OR2AK2;OR2L13	protein_coding;protein_coding	ENST00000366480.3;ENST00000366478.2	656;28698	CGI:chr1:247937023-247937424	.
cg01972576	0.568562	0.894833	-0.326271	1.23897e-14	2.13773e-17	chr8	142834857	142834858	GML;GML;RP11-706C16.5;RP11-706C16.5	protein_coding;protein_coding;antisense;antisense	ENST00000220940.1;ENST00000522728.4;ENST00000519281.4;ENST00000519411.1	55;609;-68;84	CGI:chr8:142834735-142834989	Island
cg03343128	0.326187	0.652451	-0.326263	5.00164e-18	2.28385e-20	chr1	247548838	247548839	GCSAML;GCSAML;GCSAML;GCSAML;GCSAML;GCSAML;GCSAML;GCSAML;GCSAML;GCSAML;GCSAML	protein_coding;protein_coding;protein_coding;protein_coding;protein_coding;protein_coding;protein_coding;protein_coding;protein_coding;protein_coding;protein_coding	ENST00000366488.4;ENST00000366489.4;ENST00000366491.5;ENST00000463359.4;ENST00000526896.4;ENST00000527084.4;ENST00000527541.4;ENST00000529512.4;ENST00000531662.1;ENST00000536561.4;ENST00000623578.2	-251;41717;41722;30405;41713;41779;41764;30385;30363;41779;30385	CGI:chr1:247530733-247531199	.
cg00282706	0.294722	0.620974	-0.326252	8.34674e-19	4.75018e-21	chr12	5946264	5946265	ANO2;ANO2;ANO2	protein_coding;protein_coding;protein_coding	ENST00000327087.11;ENST00000356134.8;ENST00000546188.4	-31;-31;-1004	CGI:chr12:5945183-5945566	S_Shore
cg15318176	0.523519	0.849742	-0.326223	2.28445e-10	1.32202e-13	chr7	157553133	157553134	PTPRN2;PTPRN2;PTPRN2;PTPRN2	protein_coding;protein_coding;protein_coding;protein_coding	ENST00000389413.6;ENST00000389416.7;ENST00000389418.7;ENST00000409483.4	1034641;1034579;1034547;1034656	CGI:chr7:157553919-157554375	N_Shore
cg08519134	0.460232	0.786426	-0.326194	2.68094e-16	7.41176e-19	chr8	1187026	1187027	CTD-2281E23.2	processed_transcript	ENST00000520524.4	82143	CGI:chr8:1187207-1188672	N_Shore
cg17357062	0.427368	0.75355	-0.326182	6.61841e-16	1.65283e-18	chr9	134918502	134918503	FCN1;FCN1	protein_coding;protein_coding	ENST00000371806.3;ENST00000616356.3	-538;-624	CGI:chr9:134842307-134842629	.
cg27294813	0.436174	0.762346	-0.326173	2.48468e-15	5.24668e-18	chr2	109175143	109175144	SH3RF3	protein_coding	ENST00000309415.7	45794	CGI:chr2:109128129-109130377	.
cg15852352	0.499161	0.825331	-0.32617	5.27334e-11	3.55586e-14	chr1	158399099	158399100	OR10T2	protein_coding	ENST00000334438.1	368	CGI:chr1:158180830-158181713	.
cg02687786	0.475838	0.801962	-0.326124	1.56303e-16	4.58751e-19	chr4	16969512	16969513	.	.	.	.	CGI:chr4:17511686-17512358	.
cg12161887	0.608769	0.934878	-0.326109	3.49817e-10	1.93925e-13	chr12	132271321	132271322	GALNT9;GALNT9;GALNT9	protein_coding;protein_coding;protein_coding	ENST00000328957.11;ENST00000424720.5;ENST00000535208.1	57883;58029;3898	CGI:chr12:132271054-132271369	Island
cg25478712	0.64572	0.971811	-0.326091	1.76711e-09	8.41653e-13	*	-1	-1	.	.	.	.	.	.
cg10008137	0.44686	0.772945	-0.326085	4.81725e-12	4.21193e-15	chr6	28514144	28514145	GPX6;GPX6;GPX6;GPX6	protein_coding;protein_coding;protein_coding;protein_coding	ENST00000361902.4;ENST00000474923.1;ENST00000483058.1;ENST00000612264.3	1650;1644;14072;1650	CGI:chr6:28587086-28587347	.
cg10371155	0.316765	0.642844	-0.326078	8.1754e-17	2.61076e-19	chr17	39404848	39404849	CTB-131K11.1;MED1	antisense;protein_coding	ENST00000582842.1;ENST00000394287.6	3054;46421	CGI:chr17:39401113-39402729	S_Shelf
cg22115706	0.536195	0.862261	-0.326066	1.22248e-10	7.54884e-14	chr7	130485878	130485879	MEST;MEST;MEST;MEST;MEST;MEST;RP11-2E11.5	protein_coding;protein_coding;protein_coding;protein_coding;protein_coding;protein_coding;lincRNA	ENST00000341441.8;ENST00000378576.7;ENST00000399874.5;ENST00000416162.5;ENST00000427521.4;ENST00000433159.4;ENST00000562524.1	-294;-477;-1094;-477;-459;-1249;-1485	CGI:chr7:130486176-130486960	N_Shore
cg05916059	0.447485	0.773539	-0.326054	3.68101e-16	9.80482e-19	chr16	26134749	26134750	HS3ST4;HS3ST4	protein_coding;protein_coding	ENST00000331351.5;ENST00000475436.1	442722;248002	CGI:chr16:25691634-25693310	.
cg05242592	0.514246	0.840234	-0.325988	8.67085e-14	1.18849e-16	chr16	20108843	20108844	.	.	.	.	CGI:chr16:20073172-20073983	.
cg16354520	0.340006	0.665993	-0.325987	3.47449e-12	3.13784e-15	chr1	152699231	152699232	LCE2A	protein_coding	ENST00000368779.1	866	CGI:chr1:152515581-152515794	.
cg01785490	0.40018	0.726162	-0.325982	1.46547e-22	2.84163e-24	chr1	4599628	4599629	.	.	.	.	CGI:chr1:4653929-4656495	.
cg11705747	0.574755	0.900731	-0.325976	9.55696e-10	4.82327e-13	chr2	128187494	128187495	UGGT1;UGGT1;UGGT1;UGGT1	protein_coding;protein_coding;protein_coding;protein_coding	ENST00000259253.9;ENST00000376723.6;ENST00000418197.1;ENST00000465836.1	96182;96282;7707;256	CGI:chr2:128232935-128233751	.
cg11407681	0.532365	0.858312	-0.325947	5.84556e-11	3.89853e-14	chr1	166070681	166070682	FAM78B;FAM78B;FAM78B;FAM78B;FAM78B	protein_coding;protein_coding;protein_coding;protein_coding;protein_coding	ENST00000338353.3;ENST00000354422.3;ENST00000435676.2;ENST00000441649.1;ENST00000456900.1	96289;96035;95545;95554;95701	CGI:chr1:166165021-166167211	.
cg08190545	0.478407	0.804352	-0.325945	8.093e-16	1.97321e-18	chr19	27912606	27912607	AC022153.1;CTC-459F4.3;CTC-459F4.3;LLNLF-65H9.1	transcribed_unprocessed_pseudogene;lincRNA;lincRNA;processed_transcript	ENST00000586473.2;ENST00000588122.4;ENST00000591549.1;ENST00000592806.1	10010;119142;118581;119117	CGI:chr19:27909372-27909925	S_Shelf
cg04074481	0.483592	0.809528	-0.325936	6.95412e-17	2.2673e-19	chr12	4808574	4808575	GALNT8;GALNT8;KCNA6;RP11-234B24.4	protein_coding;protein_coding;protein_coding;lincRNA	ENST00000433855.1;ENST00000542998.4;ENST00000280684.3;ENST00000542988.1	-603;45229;-603;68	CGI:chr12:4809107-4810491	N_Shore
cg19698168	0.385225	0.711132	-0.325907	1.18249e-13	1.57266e-16	chr1	248165640	248165641	.	.	.	.	CGI:chr1:247937023-247937424	.
cg26767897	0.571023	0.896929	-0.325907	5.59231e-12	4.81148e-15	chr2	31414482	31414483	XDH	protein_coding	ENST00000379416.3	234	CGI:chr2:31580223-31581334	.
cg08842032	0.419755	0.745656	-0.325901	5.53841e-18	2.50769e-20	chr17	50534786	50534787	EPN3;EPN3;EPN3;EPN3;EPN3;EPN3;EPN3;EPN3;EPN3;EPN3;EPN3;EPN3;EPN3;EPN3;EPN3;EPN3	protein_coding;protein_coding;protein_coding;protein_coding;protein_coding;protein_coding;protein_coding;protein_coding;protein_coding;protein_coding;protein_coding;protein_coding;protein_coding;protein_coding;protein_coding;protein_coding	ENST00000268933.6;ENST00000503246.1;ENST00000503690.4;ENST00000504857.1;ENST00000507467.1;ENST00000507709.1;ENST00000507998.4;ENST00000510045.4;ENST00000510462.4;ENST00000511414.4;ENST00000512291.4;ENST00000512379.4;ENST00000514874.4;ENST00000515028.4;ENST00000515126.1;ENST00000571402.1	2242;2103;2060;2021;227;293;2047;2027;2047;233;2047;2047;2060;2047;230;2047	CGI:chr17:50536517-50537105	N_Shore
cg27243490	0.595036	0.920915	-0.325879	3.30452e-11	2.33629e-14	chr2	1209140	1209141	SNTG2;SNTG2;SNTG2;SNTG2;SNTG2;SNTG2;SNTG2	protein_coding;protein_coding;protein_coding;protein_coding;protein_coding;protein_coding;protein_coding	ENST00000308624.8;ENST00000407292.1;ENST00000463442.4;ENST00000467759.4;ENST00000475201.4;ENST00000494178.1;ENST00000498321.1	258271;258200;106593;45892;45892;45576;10	CGI:chr2:1167330-1168134	.
cg06836656	0.490822	0.816636	-0.325814	8.29179e-14	1.14077e-16	chr1	2959782	2959783	.	.	.	.	CGI:chr1:2959980-2960243	N_Shore
cg14338073	0.45193	0.777725	-0.325795	1.61694e-11	1.23444e-14	chr10	43863713	43863714	LINC00840	lincRNA	ENST00000431737.1	4301	CGI:chr10:43728368-43728578	.
cg23375593	0.440168	0.765928	-0.32576	6.25497e-14	8.88851e-17	chr10	1648793	1648794	ADARB2	protein_coding	ENST00000381312.4	88684	CGI:chr10:1699230-1701931	.
cg10430011	0.455874	0.78159	-0.325716	1.8388e-11	1.38167e-14	chr5	488851	488852	SLC9A3;SLC9A3	protein_coding;protein_coding	ENST00000264938.6;ENST00000514375.1	35482;35480	CGI:chr5:488135-488595	S_Shore
cg23170495	0.511071	0.83677	-0.325698	1.49896e-12	1.48875e-15	chr10	128721560	128721561	.	.	.	.	CGI:chr10:128710103-128710394	.
cg22092397	0.342905	0.668513	-0.325608	1.08408e-19	8.07294e-22	chr5	1946098	1946099	RP11-259O2.1;RP11-259O2.1	lincRNA;lincRNA	ENST00000511693.1;ENST00000513419.1	12234;6325	CGI:chr5:1948880-1949113	N_Shelf
cg25098401	0.423003	0.748465	-0.325462	8.77448e-18	3.72929e-20	chr1	152685931	152685932	LCE2B	protein_coding	ENST00000368780.3	-193	CGI:chr1:152515581-152515794	.
cg10310616	0.415921	0.741354	-0.325433	5.77692e-20	4.6481e-22	chr2	120863833	120863834	GLI2;GLI2;GLI2;GLI2;GLI2;GLI2;GLI2;GLI2;GLI2;GLI2;GLI2;GLI2;GLI2;GLI2	protein_coding;protein_coding;protein_coding;protein_coding;protein_coding;protein_coding;protein_coding;protein_coding;protein_coding;protein_coding;protein_coding;protein_coding;protein_coding;protein_coding	ENST00000314490.14;ENST00000341310.9;ENST00000360874.9;ENST00000361492.7;ENST00000418323.4;ENST00000433812.1;ENST00000435313.5;ENST00000437950.4;ENST00000438299.4;ENST00000445186.4;ENST00000452319.4;ENST00000452692.4;ENST00000472722.4;ENST00000482119.4	66606;71549;66487;66541;127585;66487;66536;66541;71549;71549;71423;71549;128209;128209	CGI:chr2:120867415-120867634	N_Shelf
cg10256242	0.618023	0.943352	-0.325328	2.64896e-09	1.21401e-12	chr7	4810444	4810445	RADIL;RADIL;RADIL;RADIL	protein_coding;protein_coding;protein_coding;protein_coding	ENST00000399583.3;ENST00000445392.4;ENST00000469399.1;ENST00000473130.4	73276;73211;4890;21766	CGI:chr7:4808620-4809573	S_Shore
cg13726563	0.472013	0.797326	-0.325312	3.66e-16	9.75628e-19	chr13	111945279	111945280	.	.	.	.	CGI:chr13:111956344-111957119	.
cg19371339	0.349868	0.675169	-0.325301	4.37726e-14	6.52349e-17	chr1	152684722	152684723	LCE2B	protein_coding	ENST00000368780.3	-1402	CGI:chr1:152515581-152515794	.
cg20477160	0.499094	0.824336	-0.325241	2.01944e-09	9.48619e-13	chr2	235027952	235027953	SH3BP4;SH3BP4;SH3BP4;SH3BP4;SH3BP4;SH3BP4;SH3BP4	protein_coding;protein_coding;protein_coding;protein_coding;protein_coding;protein_coding;protein_coding	ENST00000344528.7;ENST00000392011.5;ENST00000409212.4;ENST00000416021.4;ENST00000444916.4;ENST00000446904.4;ENST00000454947.1	49248;75978;49266;75875;49246;46327;33111	CGI:chr2:235042808-235043170	.
cg14659008	0.559657	0.884799	-0.325142	4.14804e-10	2.26404e-13	chr8	101078087	101078088	.	.	.	.	CGI:chr8:101080566-101080910	N_Shelf
cg06878108	0.362168	0.687293	-0.325126	4.01723e-18	1.88983e-20	chr14	104400299	104400300	.	.	.	.	CGI:chr14:104429567-104431272	.
cg14361148	0.494432	0.819532	-0.3251	3.4247e-11	2.41297e-14	chr7	51431750	51431751	.	.	.	.	CGI:chr7:51388844-51389137	.
cg12114200	0.473952	0.799	-0.325048	6.39736e-09	2.71403e-12	chr13	111422529	111422530	.	.	.	.	CGI:chr13:111411222-111411675	.
cg08948808	0.328399	0.653405	-0.325006	1.63363e-12	1.60362e-15	chr1	152969527	152969528	SPRR4	protein_coding	ENST00000328051.2	-1140	CGI:chr1:153260996-153261837	.
cg15952487	0.334136	0.659102	-0.324966	1.17955e-19	8.66406e-22	chr1	158330943	158330944	CD1B;CD1B	protein_coding;protein_coding	ENST00000368168.3;ENST00000451207.4	589;83	CGI:chr1:158180830-158181713	.
cg00186815	0.456602	0.781564	-0.324962	2.00682e-09	9.43244e-13	chr8	1098135	1098136	ERICH1-AS1;ERICH1-AS1	antisense;antisense	ENST00000522092.4;ENST00000578889.1	360483;214806	CGI:chr8:1098559-1098873	N_Shore
cg26856289	0.35424	0.679198	-0.324958	2.17387e-12	2.07007e-15	chr1	23981026	23981027	SRSF10;SRSF10;SRSF10;SRSF10;SRSF10;SRSF10;SRSF10;SRSF10;SRSF10;SRSF10;SRSF10	protein_coding;protein_coding;protein_coding;protein_coding;protein_coding;protein_coding;protein_coding;protein_coding;protein_coding;protein_coding;protein_coding	ENST00000341154.9;ENST00000343255.8;ENST00000344989.9;ENST00000374452.8;ENST00000374453.6;ENST00000453840.6;ENST00000473858.4;ENST00000484146.5;ENST00000485292.1;ENST00000492112.2;ENST00000495785.1	-98;-698;-694;-717;-731;-729;-694;-669;-694;-706;-754	CGI:chr1:23979873-23980527	S_Shore
cg16088116	0.54604	0.870982	-0.324942	4.74697e-09	2.06416e-12	*	-1	-1	.	.	.	.	.	.
cg02966841	0.607971	0.932908	-0.324937	2.09987e-13	2.60576e-16	chr2	1922594	1922595	MYT1L;MYT1L;MYT1L	protein_coding;protein_coding;protein_coding	ENST00000399161.5;ENST00000428368.5;ENST00000602387.4	408601;408523;137	CGI:chr2:1937296-1937788	.
cg07867517	0.512345	0.837208	-0.324863	1.92587e-12	1.85792e-15	chr16	75486267	75486268	CHST6;CHST6;RP11-77K12.4	protein_coding;protein_coding;antisense	ENST00000332272.7;ENST00000390664.2;ENST00000530512.3	8762;9118;10370	CGI:chr16:75478647-75479818	.
cg25595388	0.43136	0.756215	-0.324854	2.98116e-08	1.1277e-11	chr5	2683890	2683891	.	.	.	.	CGI:chr5:2642991-2643195	.
cg13219080	0.483567	0.80842	-0.324853	4.43235e-18	2.0643e-20	chr1	1006781	1006782	ISG15;ISG15	protein_coding;protein_coding	ENST00000624652.1;ENST00000624697.2	5635;5642	CGI:chr1:998007-1002030	.
cg20916523	0.328073	0.652907	-0.324834	7.42925e-12	6.19547e-15	chr3	10142900	10142901	VHL;VHL;VHL	protein_coding;protein_coding;protein_coding	ENST00000256474.2;ENST00000345392.2;ENST00000477538.1	1891;1111;353	CGI:chr3:10141621-10142257	S_Shore
cg03265969	0.488029	0.812831	-0.324802	1.36932e-10	8.36335e-14	chr7	54549938	54549939	VSTM2A;VSTM2A;VSTM2A;VSTM2A;VSTM2A;VSTM2A;VSTM2A	protein_coding;protein_coding;protein_coding;protein_coding;protein_coding;protein_coding;protein_coding	ENST00000302287.6;ENST00000402613.3;ENST00000404951.4;ENST00000407838.6;ENST00000466888.4;ENST00000469952.1;ENST00000498834.4	7612;7332;7521;7612;3265;2944;3776	CGI:chr7:54546359-54547104	S_Shelf
cg09609598	0.51756	0.842334	-0.324774	2.68421e-11	1.94146e-14	chr7	49670342	49670343	.	.	.	.	CGI:chr7:49773412-49776156	.
cg02577745	0.438832	0.763563	-0.324731	3.61341e-14	5.50644e-17	chr14	100868245	100868246	MIR493	miRNA	ENST00000385254.2	-811	CGI:chr14:100882048-100882361	.
cg18395354	0.444504	0.769194	-0.32469	3.13989e-11	2.23094e-14	chr7	3761859	3761860	SDK1;SDK1;SDK1	protein_coding;protein_coding;protein_coding	ENST00000389531.6;ENST00000404826.5;ENST00000615806.3	460271;460410;460271	CGI:chr7:4114013-4114266	.
cg21049397	0.339999	0.664664	-0.324666	1.60273e-13	2.05667e-16	chr12	25458241	25458242	LMNTD1	protein_coding	ENST00000543629.4	67916	CGI:chr12:25386249-25386490	.
cg16967003	0.412332	0.736974	-0.324642	1.11257e-10	6.93313e-14	chr7	1253963	1253964	.	.	.	.	CGI:chr7:1246475-1248022	.
cg15390649	0.472496	0.797133	-0.324637	2.05352e-16	5.8481e-19	chr12	114548827	114548828	RP11-385N17.3	processed_pseudogene	ENST00000548774.1	-28	CGI:chr12:114448549-114448774	.
cg13445177	0.346169	0.67078	-0.324611	9.73684e-21	9.80689e-23	chr1	151994545	151994546	AL591893.1;S100A10;S100A10;S100A10	antisense;protein_coding;protein_coding;protein_coding	ENST00000432386.1;ENST00000368811.6;ENST00000478348.1;ENST00000478574.4	13;-154;-715;-720	CGI:chr1:151993181-151994417	S_Shore
cg20133890	0.47183	0.796402	-0.324572	4.95367e-10	2.6547e-13	chr6	31712367	31712368	LY6G6E;LY6G6E;LY6G6E;LY6G6E;XXbac-BPG32J3.19;XXbac-BPG32J3.20	protein_coding;protein_coding;protein_coding;protein_coding;protein_coding;protein_coding	ENST00000383418.7;ENST00000399142.3;ENST00000409239.4;ENST00000450147.5;ENST00000503322.1;ENST00000461287.1	1446;1446;1699;1446;5462;1706	CGI:chr6:31702817-31703497	.
cg13274978	0.563589	0.888093	-0.324504	4.75568e-11	3.2462e-14	chr8	51408289	51408290	PXDNL;PXDNL;PXDNL	protein_coding;protein_coding;protein_coding	ENST00000356297.4;ENST00000522628.4;ENST00000522933.4	401157;1133;691	CGI:chr8:51408602-51409661	N_Shore
cg17565113	0.470594	0.795095	-0.3245	8.35367e-17	2.66162e-19	chr12	52521252	52521253	KRT5;KRT5;KRT5;KRT5;KRT5	protein_coding;protein_coding;protein_coding;protein_coding;protein_coding	ENST00000252242.7;ENST00000546577.1;ENST00000549420.1;ENST00000551275.1;ENST00000552629.4	-564;-721;-880;-857;-857	CGI:chr12:52600988-52601528	.
cg23759189	0.409072	0.733533	-0.324461	1.84553e-11	1.38613e-14	chr11	131540974	131540975	AP003025.2;AP003025.2;AP003025.2;NTM;NTM;NTM;NTM	antisense;antisense;antisense;protein_coding;protein_coding;protein_coding;protein_coding	ENST00000414466.4;ENST00000414856.1;ENST00000443319.1;ENST00000374791.6;ENST00000436745.4;ENST00000477098.1;ENST00000550167.4	-106;-375;-357;170495;170347;170344;85510	CGI:chr11:131690462-131690665	.
cg02485729	0.413838	0.738291	-0.324453	6.98561e-16	1.73279e-18	chr12	128509882	128509883	TMEM132C	protein_coding	ENST00000435159.2	242478	CGI:chr12:128415268-128415520	.
cg22129180	0.3688	0.693226	-0.324425	2.83285e-17	1.03646e-19	chr8	48980421	48980422	.	.	.	.	CGI:chr8:48977827-48978315	S_Shelf
cg07981869	0.569746	0.894123	-0.324378	2.33291e-10	1.34717e-13	chr19	33683759	33683760	CHST8;CHST8;CHST8;CHST8;CHST8	protein_coding;protein_coding;protein_coding;protein_coding;protein_coding	ENST00000262622.4;ENST00000434302.4;ENST00000438847.6;ENST00000591231.4;ENST00000604556.1	-770;61803;61787;61803;61774	CGI:chr19:33684438-33684862	N_Shore
cg08214060	0.502001	0.826316	-0.324315	5.21741e-11	3.52426e-14	chr11	132237640	132237641	NTM;NTM;NTM;NTM;NTM;NTM;NTM;NTM;NTM;NTM;NTM;NTM;NTM	protein_coding;protein_coding;protein_coding;protein_coding;protein_coding;protein_coding;protein_coding;protein_coding;protein_coding;protein_coding;protein_coding;protein_coding;protein_coding	ENST00000374784.4;ENST00000374786.4;ENST00000374791.6;ENST00000425719.5;ENST00000427481.5;ENST00000467255.4;ENST00000474900.4;ENST00000482316.4;ENST00000490356.2;ENST00000496094.4;ENST00000498764.4;ENST00000539799.4;ENST00000550167.4	326171;326636;867161;326177;91364;96628;25882;25840;25840;25899;327595;91364;782176	CGI:chr11:131910458-131911638	.
cg08800461	0.392802	0.717092	-0.32429	1.02258e-15	2.41582e-18	chr2	167713929	167713930	CTAGE14P	processed_pseudogene	ENST00000397819.2	2137	CGI:chr2:167716039-167716324	N_Shelf
cg01521036	0.628697	0.952964	-0.324267	7.44342e-15	1.3708e-17	chr8	7717718	7717719	FAM90A14P	unprocessed_pseudogene	ENST00000530386.1	2274	CGI:chr8:7733011-7733446	.
cg13448828	0.531751	0.855977	-0.324226	1.38542e-13	1.80662e-16	chr2	111068913	111068914	ACOXL;ACOXL;ACOXL;ACOXL;ACOXL	protein_coding;protein_coding;protein_coding;protein_coding;protein_coding	ENST00000389811.7;ENST00000417074.4;ENST00000439055.4;ENST00000441974.1;ENST00000443586.4	336339;269872;336339;81714;105288	CGI:chr2:111117629-111123388	.
cg17115419	0.415837	0.740046	-0.324209	3.22726e-13	3.81795e-16	chr10	5551963	5551964	.	.	.	.	CGI:chr10:5525159-5525865	.
cg26286839	0.403456	0.727652	-0.324195	5.68447e-15	1.0804e-17	chr5	80083132	80083133	CTD-2201I18.1;CTD-2201I18.1;THBS4;THBS4;THBS4;THBS4	antisense;antisense;protein_coding;protein_coding;protein_coding;protein_coding	ENST00000503007.4;ENST00000514042.1;ENST00000350881.5;ENST00000504720.4;ENST00000511733.1;ENST00000511888.1	-727;523;47783;4296;47108;1127	CGI:chr5:80035105-80035665	.
cg09600088	0.436172	0.760301	-0.324129	1.25963e-13	1.66178e-16	chr11	1443255	1443256	BRSK2;BRSK2;BRSK2;BRSK2;BRSK2;BRSK2;BRSK2;BRSK2;BRSK2;BRSK2	protein_coding;protein_coding;protein_coding;protein_coding;protein_coding;protein_coding;protein_coding;protein_coding;protein_coding;protein_coding	ENST00000308219.12;ENST00000382179.4;ENST00000524702.4;ENST00000526678.4;ENST00000528710.4;ENST00000528841.4;ENST00000529433.4;ENST00000529951.4;ENST00000531078.1;ENST00000531197.4	53355;32102;33495;52969;32811;53353;53353;2455;809;53353	CGI:chr11:1443065-1443694	Island
cg07319315	0.509821	0.833873	-0.324052	1.36638e-11	1.06074e-14	chr2	134392028	134392029	MGAT5;MGAT5	protein_coding;protein_coding	ENST00000281923.3;ENST00000409645.4	137768;271845	CGI:chr2:134191496-134192156	.
cg11168293	0.499189	0.823212	-0.324022	2.68808e-14	4.22497e-17	chr22	48671210	48671211	FAM19A5;FAM19A5;FAM19A5;FAM19A5	protein_coding;protein_coding;protein_coding;protein_coding	ENST00000336769.8;ENST00000358295.8;ENST00000402357.4;ENST00000473898.1	181617;94903;181749;94756	CGI:chr22:48667726-48668088	S_Shelf
cg25147941	0.470507	0.794505	-0.323998	2.99637e-13	3.57075e-16	chr5	164466997	164466998	CTC-340A15.2;CTC-340A15.2;CTC-340A15.2;CTC-340A15.2;CTC-340A15.2;CTC-340A15.2;CTC-340A15.2;CTC-340A15.2;CTC-340A15.2;CTC-340A15.2;CTC-340A15.2;CTC-340A15.2;CTD-2313P7.1	antisense;antisense;antisense;antisense;antisense;antisense;antisense;antisense;antisense;antisense;antisense;antisense;lincRNA	ENST00000486913.3;ENST00000517508.4;ENST00000519327.4;ENST00000519329.1;ENST00000519570.4;ENST00000519901.1;ENST00000522303.4;ENST00000522646.4;ENST00000522686.4;ENST00000523648.4;ENST00000523704.4;ENST00000524297.4;ENST00000519929.1	112856;170300;-294;112843;170018;-965;169934;169867;170010;170078;170012;170027;406	CGI:chr5:163505448-163505940	.
cg09961427	0.54867	0.872549	-0.323879	1.01419e-10	6.37581e-14	chr2	126699917	126699918	.	.	.	.	CGI:chr2:126656120-126656595	.
cg07658681	0.509646	0.833452	-0.323807	2.77034e-13	3.32517e-16	chr10	71793444	71793445	CDH23;CDH23	protein_coding;protein_coding	ENST00000224721.9;ENST00000622827.3	396509;396509	CGI:chr10:71773334-71773735	.
cg00159873	0.438942	0.762711	-0.323769	2.40672e-15	5.10207e-18	chr8	798281	798282	ERICH1-AS1;ERICH1-AS1	antisense;antisense	ENST00000522092.4;ENST00000577187.4	60629;60538	CGI:chr8:798280-798544	Island
cg13474004	0.52131	0.845066	-0.323756	1.59603e-08	6.31912e-12	chr8	1835814	1835815	ARHGEF10;ARHGEF10;ARHGEF10;ARHGEF10	protein_coding;protein_coding;protein_coding;protein_coding	ENST00000349830.6;ENST00000398564.4;ENST00000518288.4;ENST00000520359.4	11837;9702;11798;11825	CGI:chr8:1831454-1831655	.
cg01427630	0.435926	0.759623	-0.323697	1.97032e-13	2.46378e-16	chr16	13176789	13176790	SHISA9;SHISA9	protein_coding;protein_coding	ENST00000558583.2;ENST00000566106.1	275168;94408	CGI:chr16:12900717-12903833	.
cg17952824	0.326917	0.650535	-0.323617	2.21609e-17	8.42162e-20	chr10	43791575	43791576	HNRNPA3P1	processed_pseudogene	ENST00000401429.1	-1187	CGI:chr10:43728368-43728578	.
cg16888658	0.269138	0.592734	-0.323597	1.01693e-18	5.64961e-21	chr2	24919248	24919249	ADCY3;ADCY3;ADCY3;ADCY3	protein_coding;protein_coding;protein_coding;protein_coding	ENST00000260600.8;ENST00000405392.4;ENST00000435135.4;ENST00000438445.1	592;-61;592;265	CGI:chr2:24919603-24920820	N_Shore
cg12924899	0.46698	0.790552	-0.323571	2.0027e-14	3.25718e-17	chr13	113064353	113064354	MCF2L;MCF2L;MCF2L;MCF2L;MCF2L;MCF2L;MCF2L;MCF2L;MCF2L	protein_coding;protein_coding;protein_coding;protein_coding;protein_coding;protein_coding;protein_coding;protein_coding;protein_coding	ENST00000375597.7;ENST00000375604.5;ENST00000375608.6;ENST00000397030.4;ENST00000421756.4;ENST00000423251.1;ENST00000464800.4;ENST00000475524.1;ENST00000535094.5	62598;62638;169974;95852;85040;19501;40;-338;95131	CGI:chr13:113067206-113067893	N_Shelf
cg23564432	0.363142	0.686712	-0.32357	8.45323e-13	8.97779e-16	chr8	3396436	3396437	CSMD1;CSMD1;CSMD1;CSMD1;CSMD1;CSMD1;CSMD1	protein_coding;protein_coding;protein_coding;protein_coding;protein_coding;protein_coding;protein_coding	ENST00000335551.10;ENST00000400186.6;ENST00000520002.4;ENST00000523488.4;ENST00000537824.2;ENST00000602557.4;ENST00000602723.4	13172;1598266;1598537;-116;635665;1598537;1598266	CGI:chr8:3022164-3022426	.
cg06440275	0.406983	0.730529	-0.323546	8.30484e-16	2.01155e-18	chr8	2057583	2057584	MYOM2;MYOM2	protein_coding;protein_coding	ENST00000262113.7;ENST00000523438.1	12542;12513	CGI:chr8:2055691-2056016	S_Shore
cg01819142	0.529972	0.853471	-0.323498	5.90217e-12	5.05323e-15	chr8	138052064	138052065	RP11-238K6.1	lincRNA	ENST00000518973.1	31507	CGI:chr8:138496552-138497531	.
cg06798887	0.490661	0.814138	-0.323477	2.84918e-12	2.63291e-15	chr16	17804902	17804903	.	.	.	.	CGI:chr16:17470287-17471005	.
cg08862366	0.38515	0.708625	-0.323475	3.50367e-16	9.37885e-19	chr16	86119319	86119320	.	.	.	.	CGI:chr16:85972589-85974081	.
cg07795964	0.622352	0.945825	-0.323473	2.12568e-12	2.03109e-15	chr4	2064593	2064594	NAT8L;NAT8L	protein_coding;protein_coding	ENST00000331662.3;ENST00000423729.2	4780;5080	CGI:chr4:2063815-2064671	Island
cg05764691	0.502349	0.825798	-0.323449	1.95817e-11	1.46317e-14	chr16	22916264	22916265	HS3ST2;HS3ST2	protein_coding;protein_coding	ENST00000261374.3;ENST00000473392.1	102086;101766	CGI:chr16:22915022-22915318	S_Shore
cg19050555	0.404082	0.727512	-0.32343	5.51883e-14	7.96368e-17	chr12	49268622	49268623	RP11-161H23.5;TUBA1C;TUBA1C;TUBA1C;TUBA1C;TUBA1C;TUBA1C;TUBA1C	antisense;protein_coding;protein_coding;protein_coding;protein_coding;protein_coding;protein_coding;protein_coding	ENST00000550468.2;ENST00000301072.9;ENST00000541364.4;ENST00000548470.1;ENST00000549183.1;ENST00000549818.4;ENST00000552125.1;ENST00000552448.1	4685;3714;40695;-1165;3540;40694;40578;40691	CGI:chr12:49264463-49265392	S_Shelf
cg04075546	0.495272	0.818695	-0.323422	1.81501e-11	1.36614e-14	chr7	54075329	54075330	.	.	.	.	CGI:chr7:54542041-54542447	.
cg25401594	0.573413	0.896828	-0.323414	5.64865e-13	6.29126e-16	chr19	56812490	56812491	PEG3;PEG3;ZIM2;ZIM2;ZIM2;ZIM2;ZIM2;ZIM2	protein_coding;protein_coding;protein_coding;protein_coding;protein_coding;protein_coding;protein_coding;protein_coding	ENST00000326441.12;ENST00000599565.1;ENST00000593711.4;ENST00000595671.4;ENST00000597281.4;ENST00000599935.4;ENST00000601070.4;ENST00000629319.1	28207;-1206;28218;23589;23589;28240;23589;28240	CGI:chr19:56795314-56795664	.
cg08768395	0.272414	0.595794	-0.32338	3.83466e-21	4.5038e-23	chr5	33889356	33889357	ADAMTS12;ADAMTS12;ADAMTS12;ADAMTS12;RNU6-923P	protein_coding;protein_coding;protein_coding;protein_coding;snRNA	ENST00000352040.6;ENST00000504830.4;ENST00000509762.1;ENST00000515401.1;ENST00000364753.1	2586;2837;2253;2664;-1193	CGI:chr5:33892086-33892298	N_Shelf
cg00319312	0.411549	0.734919	-0.323369	1.11498e-13	1.48976e-16	chr1	203702012	203702013	ATP2B4;ATP2B4;ATP2B4	protein_coding;protein_coding;protein_coding	ENST00000341360.5;ENST00000357681.8;ENST00000367218.6	19202;75450;75224	CGI:chr1:203629343-203629725	.
cg10754505	0.478933	0.802274	-0.323342	1.03198e-12	1.06901e-15	chr20	61728825	61728826	CDH4;CDH4;CDH4	protein_coding;protein_coding;protein_coding	ENST00000543233.2;ENST00000611855.3;ENST00000614565.3	129063;158689;476398	CGI:chr20:61773042-61773372	.
cg07945323	0.464105	0.7874	-0.323295	1.89582e-15	4.16533e-18	chr21	30600353	30600354	KRTAP22-1;KRTAP6-2	protein_coding;protein_coding	ENST00000334680.3;ENST00000334897.4	-735;-1450	CGI:chr21:31251828-31252066	.
cg00790835	0.451542	0.774782	-0.32324	6.77507e-13	7.37451e-16	chr14	72562735	72562736	RGS6;RGS6;RGS6;RGS6;RGS6;RGS6;RGS6;RP3-514A23.2	protein_coding;protein_coding;protein_coding;protein_coding;protein_coding;protein_coding;protein_coding;lincRNA	ENST00000343854.9;ENST00000402788.5;ENST00000553530.4;ENST00000554300.1;ENST00000554474.4;ENST00000554782.1;ENST00000622468.3;ENST00000555303.1	210641;210642;629618;22672;629589;103065;210641;32391	CGI:chr14:72892081-72894226	.
cg21587469	0.326994	0.650228	-0.323234	1.33051e-15	3.04664e-18	chr12	55930032	55930033	DGKA;DGKA;DGKA;DGKA;DGKA;DGKA;DGKA;DGKA;DGKA;DGKA;DGKA;DGKA;DGKA;DGKA;WIBG	protein_coding;protein_coding;protein_coding;protein_coding;protein_coding;protein_coding;protein_coding;protein_coding;protein_coding;protein_coding;protein_coding;protein_coding;protein_coding;protein_coding;protein_coding	ENST00000331886.8;ENST00000546878.4;ENST00000546995.4;ENST00000547015.4;ENST00000547324.4;ENST00000547358.4;ENST00000548407.5;ENST00000548479.1;ENST00000548549.4;ENST00000549368.4;ENST00000549629.4;ENST00000553084.4;ENST00000555090.4;ENST00000555218.4;ENST00000547925.1	-941;2712;1776;-397;-1161;-1268;-1441;-1141;-1422;-1422;-1131;-1184;-1058;-1131;2587	CGI:chr12:55932003-55932439	N_Shore
cg02106180	0.442725	0.765917	-0.323192	1.66493e-17	6.52548e-20	chr16	795767	795768	CHTF18;CHTF18;CHTF18;CHTF18;CHTF18;CHTF18;CHTF18;CHTF18	protein_coding;protein_coding;protein_coding;protein_coding;protein_coding;protein_coding;protein_coding;protein_coding	ENST00000262315.12;ENST00000317063.9;ENST00000455171.5;ENST00000464728.4;ENST00000471202.4;ENST00000493715.1;ENST00000498439.1;ENST00000631357.1	7144;7141;7142;7144;7131;1064;-849;7720	CGI:chr16:795363-795867	Island
cg13320538	0.472843	0.796005	-0.323162	9.33373e-14	1.27088e-16	chr8	2562730	2562731	.	.	.	.	CGI:chr8:2561843-2562368	S_Shore
cg23860325	0.293526	0.616659	-0.323134	3.31733e-19	2.13628e-21	chr7	54203459	54203460	.	.	.	.	CGI:chr7:54542041-54542447	.
cg04439557	0.440925	0.764027	-0.323102	6.03004e-11	4.00781e-14	chr1	1758013	1758014	NADK;NADK;NADK;NADK;NADK;NADK;NADK;NADK;NADK;NADK;NADK	protein_coding;protein_coding;protein_coding;protein_coding;protein_coding;protein_coding;protein_coding;protein_coding;protein_coding;protein_coding;protein_coding	ENST00000341426.8;ENST00000341991.6;ENST00000342348.8;ENST00000378625.4;ENST00000460602.4;ENST00000469045.4;ENST00000477235.4;ENST00000489538.1;ENST00000492768.4;ENST00000492845.5;ENST00000497186.4	20458;20778;563;22057;20407;-744;-988;-1404;20407;21950;-784	CGI:chr1:1760328-1760624	N_Shelf
cg04416111	0.339172	0.662204	-0.323032	5.68886e-14	8.18037e-17	chr16	87201289	87201290	C16orf95	protein_coding	ENST00000562840.1	101474	CGI:chr16:87216491-87217139	.
cg23147597	0.575005	0.898036	-0.323031	3.32758e-13	3.92403e-16	chr19	44671409	44671410	CEACAM19;CEACAM19;CEACAM19;CEACAM19;CEACAM19;CEACAM19;CEACAM19;CEACAM19;CTB-171A8.1	protein_coding;protein_coding;protein_coding;protein_coding;protein_coding;protein_coding;protein_coding;protein_coding;antisense	ENST00000358777.7;ENST00000403660.3;ENST00000480278.4;ENST00000591979.1;ENST00000592789.4;ENST00000618372.3;ENST00000619799.3;ENST00000622237.3;ENST00000590796.1	-44;-314;-1070;9130;9130;9130;9130;9130;47223	CGI:chr19:44647097-44647562	.
cg12081389	0.486194	0.809224	-0.323029	1.86944e-10	1.10394e-13	chr6	29044492	29044493	OR2W1;XXbac-BPG258E24.10;XXbac-BPG258E24.10	protein_coding;antisense;antisense	ENST00000377175.1;ENST00000623334.2;ENST00000623946.1	749;8470;8268	CGI:chr6:29016641-29016878	.
cg22601108	0.454152	0.777174	-0.323023	9.15986e-13	9.61305e-16	chr1	158754149	158754150	OR6K6	protein_coding	ENST00000368144.2	-572	CGI:chr1:159171412-159171928	.
cg00747618	0.468569	0.791562	-0.322992	1.62877e-12	1.59975e-15	chr1	247449399	247449400	.	.	.	.	CGI:chr1:247451393-247451642	N_Shore
cg07830134	0.545997	0.868985	-0.322989	1.11862e-10	6.96649e-14	chr16	1199204	1199205	CACNA1H;CACNA1H;CACNA1H	protein_coding;protein_coding;protein_coding	ENST00000348261.8;ENST00000358590.7;ENST00000565831.4	45962;45962;45465	CGI:chr16:1198853-1199446	Island
cg10945695	0.510117	0.833092	-0.322975	2.18426e-15	4.69445e-18	chr5	32871025	32871026	.	.	.	.	CGI:chr5:32709804-32714344	.
cg25188760	0.423565	0.746509	-0.322945	3.91002e-17	1.37677e-19	chr20	5320901	5320902	.	.	.	.	CGI:chr20:5315620-5317152	S_Shelf
cg00820961	0.444685	0.76763	-0.322945	5.79135e-13	6.42769e-16	chr9	135732986	135732987	KCNT1;KCNT1;KCNT1;KCNT1;KCNT1;KCNT1;KCNT1	protein_coding;protein_coding;protein_coding;protein_coding;protein_coding;protein_coding;protein_coding	ENST00000371757.5;ENST00000460750.4;ENST00000473941.4;ENST00000486577.5;ENST00000487664.4;ENST00000628528.1;ENST00000630792.1	30793;30772;18527;18465;30800;30800;18359	CGI:chr9:135734698-135734943	N_Shore
cg19908611	0.450339	0.773236	-0.322897	1.0339e-16	3.2005e-19	chr7	1294276	1294277	.	.	.	.	CGI:chr7:1297469-1297752	N_Shelf
cg13042250	0.481414	0.804285	-0.322871	1.54247e-11	1.18262e-14	chr7	1568232	1568233	PSMG3;PSMG3;PSMG3	protein_coding;protein_coding;protein_coding	ENST00000252329.3;ENST00000288607.2;ENST00000404674.6	2774;1762;1814	CGI:chr7:1569789-1570401	N_Shore
cg22101977	0.437101	0.759962	-0.32286	2.52413e-13	3.06363e-16	chr7	51646535	51646536	.	.	.	.	CGI:chr7:51388844-51389137	.
cg14143580	0.409671	0.732529	-0.322858	9.72996e-14	1.31944e-16	chr20	31373179	31373180	DEFB118	protein_coding	ENST00000253381.2	4560	CGI:chr20:31475246-31475478	.
cg25257905	0.620956	0.943779	-0.322823	2.47498e-12	2.32019e-15	chr19	56824439	56824440	PEG3;PEG3;PEG3;PEG3;PEG3;PEG3;PEG3;PEG3;ZIM2;ZIM2;ZIM2;ZIM2;ZIM2;ZIM2;ZIM2	protein_coding;protein_coding;protein_coding;protein_coding;protein_coding;protein_coding;protein_coding;protein_coding;protein_coding;protein_coding;protein_coding;protein_coding;protein_coding;protein_coding;protein_coding	ENST00000326441.12;ENST00000593695.4;ENST00000594706.4;ENST00000596261.4;ENST00000598410.4;ENST00000599534.4;ENST00000599577.4;ENST00000600833.1;ENST00000593711.4;ENST00000593931.1;ENST00000595671.4;ENST00000597281.4;ENST00000599935.4;ENST00000601070.4;ENST00000629319.1	16258;16258;16290;16224;16288;568;16258;210;16269;-124;11640;11640;16291;11640;16291	CGI:chr19:56838629-56839102	.
cg14906103	0.41765	0.740448	-0.322797	3.03926e-16	8.28459e-19	chr4	41934835	41934836	TMEM33;TMEM33;TMEM33;TMEM33;TMEM33;TMEM33;TMEM33	protein_coding;protein_coding;protein_coding;protein_coding;protein_coding;protein_coding;protein_coding	ENST00000264452.8;ENST00000325094.8;ENST00000504986.4;ENST00000506794.1;ENST00000508448.4;ENST00000510383.1;ENST00000513702.4	-295;-318;-286;-610;-295;-550;-295	CGI:chr4:41935081-41935607	N_Shore
cg00259019	0.552488	0.875277	-0.322789	3.27899e-15	6.69166e-18	chr2	235703355	235703356	AGAP1;AGAP1;AGAP1;AGAP1;AGAP1	protein_coding;protein_coding;protein_coding;protein_coding;protein_coding	ENST00000304032.11;ENST00000336665.8;ENST00000402604.5;ENST00000409457.4;ENST00000409538.4	209247;209247;179030;209265;33750	CGI:chr2:235669680-235671509	.
cg03129645	0.488478	0.811247	-0.322769	2.48087e-12	2.32447e-15	chr7	142248079	142248080	MOXD2P	transcribed_unprocessed_pseudogene	ENST00000460233.4	-1011	CGI:chr7:141738204-141738593	.
cg12820006	0.546988	0.869709	-0.322721	1.85874e-12	1.8016e-15	chr14	101025160	101025161	MIR1197;MIR323A;MIR758	miRNA;miRNA;miRNA	ENST00000408818.2;ENST00000362199.2;ENST00000390227.1	-391;-553;-861	CGI:chr14:101065306-101066047	.
cg12397274	0.363231	0.685922	-0.322691	1.38501e-15	3.158e-18	chr6	54307385	54307386	TINAG;TINAG;TINAG;TINAG	protein_coding;protein_coding;protein_coding;protein_coding	ENST00000259782.7;ENST00000370864.3;ENST00000370869.6;ENST00000486436.1	-1071;-1189;-582;-475	CGI:chr6:53794456-53796174	.
cg11195360	0.516124	0.838738	-0.322614	1.40901e-11	1.0902e-14	chr11	124441503	124441504	OR8B8	protein_coding	ENST00000328064.2	-344	CGI:chr11:124622768-124623257	.
cg24537688	0.408002	0.730576	-0.322574	2.56878e-17	9.54937e-20	chr2	136493047	136493048	.	.	.	.	CGI:chr2:136423491-136423731	.
cg11644755	0.51796	0.84053	-0.322569	3.86521e-13	4.48847e-16	chr8	1359257	1359258	.	.	.	.	CGI:chr8:1359941-1360333	N_Shore
cg02975060	0.512093	0.834657	-0.322564	3.23002e-12	2.94288e-15	chr14	101043679	101043680	MIR1185-2;MIR381HG	miRNA;lincRNA	ENST00000408687.1;ENST00000553692.1	-520;-1479	CGI:chr14:101065306-101066047	.
cg20823091	0.443326	0.765887	-0.322561	5.15594e-12	4.47509e-15	chr1	152708163	152708164	LCE4A;LCE4A	protein_coding;protein_coding	ENST00000335535.3;ENST00000368777.1	-885;2	CGI:chr1:152515581-152515794	.
cg16921285	0.503593	0.826131	-0.322538	3.9093e-15	7.78581e-18	chr13	103350856	103350857	.	.	.	.	CGI:chr13:102845750-102846413	.
cg17702736	0.437187	0.7597	-0.322513	6.35989e-12	5.39889e-15	chr6	35973932	35973933	SLC26A8;SLC26A8;SLC26A8;SLC26A8	protein_coding;protein_coding;protein_coding;protein_coding	ENST00000355574.5;ENST00000394602.5;ENST00000486155.1;ENST00000490799.4	50657;50562;50925;50924	CGI:chr6:35920607-35921283	.
cg13794641	0.55651	0.878978	-0.322468	1.34773e-10	8.24991e-14	*	-1	-1	.	.	.	.	.	.
cg25398727	0.44611	0.768387	-0.322277	1.68365e-15	3.74858e-18	chr8	10898710	10898711	XKR6;XKR6	protein_coding;protein_coding	ENST00000382461.6;ENST00000416569.2	103772;302657	CGI:chr8:10924544-10924793	.
cg14544225	0.47169	0.793894	-0.322204	1.94272e-14	3.16879e-17	chr17	11236333	11236334	.	.	.	.	CGI:chr17:11240170-11242099	N_Shelf
cg24864399	0.522572	0.844727	-0.322155	9.52366e-13	9.94416e-16	chr5	26669501	26669502	CTD-2533K21.3	processed_pseudogene	ENST00000413321.2	154	CGI:chr5:26669439-26669795	Island
cg27168737	0.49247	0.814621	-0.32215	6.97167e-12	5.85003e-15	chr1	237886204	237886205	RP11-193H5.1;ZP4;ZP4	antisense;protein_coding;protein_coding	ENST00000450451.1;ENST00000366570.4;ENST00000611898.3	24028;4591;4719	CGI:chr1:237783887-237784148	.
cg22950831	0.357836	0.679941	-0.322105	1.528e-13	1.97161e-16	chr10	126902428	126902429	.	.	.	.	CGI:chr10:126905040-126906479	N_Shelf
cg00647046	0.602692	0.924749	-0.322057	2.55501e-10	1.46132e-13	chr10	132921108	132921109	CFAP46	protein_coding	ENST00000368586.8	21478	CGI:chr10:132919097-132920273	S_Shore
cg10322735	0.471671	0.793706	-0.322035	1.35435e-14	2.31061e-17	chr4	181159498	181159499	LINC00290	lincRNA	ENST00000512487.1	-348	CGI:chr4:182141125-182141328	.
cg20773915	0.351028	0.67304	-0.322012	1.25356e-14	2.16068e-17	chr1	6111728	6111729	CHD5;CHD5;CHD5;CHD5	protein_coding;protein_coding;protein_coding;protein_coding	ENST00000262450.6;ENST00000377999.4;ENST00000462991.4;ENST00000496404.1	68396;20012;32377;68296	CGI:chr1:6127683-6128175	.
cg18786237	0.576021	0.898003	-0.321982	8.18876e-12	6.74448e-15	chr8	1232281	1232282	CTD-2281E23.2	processed_transcript	ENST00000520524.4	127398	CGI:chr8:1235092-1235445	N_Shelf
cg03635863	0.500125	0.821999	-0.321874	5.29566e-11	3.56953e-14	chr5	6134336	6134337	CTD-2299N12.1	TEC	ENST00000624837.1	32	CGI:chr5:6378178-6378733	.
cg07402411	0.600127	0.921984	-0.321858	5.55363e-09	2.38485e-12	chr13	112888811	112888812	.	.	.	.	CGI:chr13:112886036-112886244	S_Shelf
cg17930201	0.356148	0.677978	-0.32183	1.36219e-14	2.32169e-17	chr1	155858383	155858384	GON4L;GON4L;GON4L;GON4L;GON4L;GON4L;GON4L;GON4L;SYT11	protein_coding;protein_coding;protein_coding;protein_coding;protein_coding;protein_coding;protein_coding;protein_coding;protein_coding	ENST00000271883.8;ENST00000361040.8;ENST00000368331.4;ENST00000437809.4;ENST00000471341.4;ENST00000615926.3;ENST00000620426.3;ENST00000622608.1;ENST00000368324.4	-1087;-1178;-1087;1018;-1165;1018;-1087;-1087;-1127	CGI:chr1:155859318-155859640	N_Shore
cg03952361	0.549864	0.871688	-0.321824	4.91633e-14	7.21323e-17	chr12	132293792	132293793	GALNT9;GALNT9	protein_coding;protein_coding	ENST00000328957.11;ENST00000424720.5	35412;35558	CGI:chr12:132295757-132296000	N_Shore
cg22702857	0.47115	0.792962	-0.321812	5.82166e-12	4.98918e-15	chr12	4160819	4160820	.	.	.	.	CGI:chr12:4164653-4165325	N_Shelf
cg09318158	0.438497	0.760279	-0.321782	2.0057e-15	4.36972e-18	chr19	53688356	53688357	MIR1283-1	miRNA	ENST00000408494.1	-126	CGI:chr19:53647822-53648987	.
cg13106156	0.377208	0.698985	-0.321777	1.80968e-21	2.39466e-23	chr6	33173157	33173158	COL11A2;COL11A2;COL11A2;COL11A2	protein_coding;protein_coding;protein_coding;protein_coding	ENST00000341947.5;ENST00000361917.4;ENST00000374708.7;ENST00000477772.1	19312;19312;19343;4737	CGI:chr6:33161514-33161941	.
cg15473218	0.502846	0.824589	-0.321743	2.90805e-14	4.53876e-17	chr19	17998236	17998237	KCNN1;KCNN1	protein_coding;protein_coding	ENST00000222249.12;ENST00000615435.1	46942;24366	CGI:chr19:17998085-17998463	Island
cg06765219	0.441521	0.763257	-0.321736	2.65163e-18	1.32168e-20	chr8	694572	694573	ERICH1;ERICH1;ERICH1;ERICH1	protein_coding;protein_coding;protein_coding;protein_coding	ENST00000262109.7;ENST00000518277.1;ENST00000522706.4;ENST00000524138.4	36668;43535;36626;21356	CGI:chr8:699637-700596	.
cg06961429	0.400353	0.721978	-0.321625	5.19864e-15	9.98093e-18	chr14	101027024	101027025	MIR329-2	miRNA	ENST00000385029.1	-77	CGI:chr14:101065306-101066047	.
cg03528824	0.440096	0.761601	-0.321505	1.21775e-11	9.56062e-15	chr11	125240331	125240332	PKNOX2;PKNOX2;PKNOX2;PKNOX2;PKNOX2;PKNOX2;PKNOX2;PKNOX2;PKNOX2;PKNOX2;PKNOX2	protein_coding;protein_coding;protein_coding;protein_coding;protein_coding;protein_coding;protein_coding;protein_coding;protein_coding;protein_coding;protein_coding	ENST00000298282.12;ENST00000527238.4;ENST00000530517.4;ENST00000531116.4;ENST00000531212.4;ENST00000532623.4;ENST00000557814.4;ENST00000558729.4;ENST00000559662.4;ENST00000561115.4;ENST00000561399.4	75624;75595;75643;75635;56143;75576;75602;267;75604;257;75578	CGI:chr11:125165039-125166779	.
cg26330275	0.430299	0.751761	-0.321463	8.90245e-15	1.60172e-17	chr12	4440337	4440338	FGF6;FGF6	protein_coding;protein_coding	ENST00000228837.2;ENST00000543077.1	5278;3883	CGI:chr12:4445239-4445458	.
cg05245416	0.541745	0.863193	-0.321449	8.34186e-12	6.85686e-15	chr2	104470552	104470553	LINC01102;LINC01102;LINC01102;LINC01102	lincRNA;lincRNA;lincRNA;lincRNA	ENST00000414442.1;ENST00000429464.1;ENST00000447380.1;ENST00000451400.1	36185;36189;36173;37284	CGI:chr2:104659130-104659482	.
cg19521511	0.381118	0.702561	-0.321443	2.52589e-19	1.67595e-21	chr7	57450107	57450108	ZNF716	protein_coding	ENST00000420713.1	-71	CGI:chr7:57424427-57425366	.
cg12145085	0.51047	0.831904	-0.321434	5.5042e-12	4.74383e-15	chr14	72823187	72823188	DPF3;DPF3;DPF3;DPF3;DPF3;DPF3;DPF3;DPF3;DPF3	protein_coding;protein_coding;protein_coding;protein_coding;protein_coding;protein_coding;protein_coding;protein_coding;protein_coding	ENST00000366353.7;ENST00000381216.7;ENST00000541685.4;ENST00000546183.1;ENST00000555469.1;ENST00000556509.4;ENST00000556902.4;ENST00000610283.3;ENST00000614862.3	69463;70915;70930;70915;13297;70902;13297;69463;70930	CGI:chr14:72892081-72894226	.
cg20554882	0.365501	0.68693	-0.321429	2.241e-20	2.01889e-22	chr4	181738971	181738972	.	.	.	.	CGI:chr4:182141125-182141328	.
cg05251814	0.447598	0.768992	-0.321394	1.22934e-16	3.72044e-19	chr16	535386	535387	CAPN15;CAPN15;CAPN15;CAPN15;CAPN15	protein_coding;protein_coding;protein_coding;protein_coding;protein_coding	ENST00000219611.5;ENST00000562370.4;ENST00000567216.4;ENST00000568402.1;ENST00000568988.4	7529;7668;7637;-1477;7562	CGI:chr16:537651-538172	N_Shelf
cg10520543	0.335149	0.656493	-0.321345	4.87339e-19	2.96899e-21	chr12	125326142	125326143	TMEM132B;TMEM132B;TMEM132B	protein_coding;protein_coding;protein_coding	ENST00000299308.6;ENST00000418253.2;ENST00000535330.1	-475;139305;-410	CGI:chr12:125331009-125331271	.
cg21938894	0.311797	0.633098	-0.321301	1.46105e-22	2.84093e-24	chr11	66293118	66293119	TMEM151A	protein_coding	ENST00000327259.4	1247	CGI:chr11:66291750-66292464	S_Shore
cg18384960	0.488705	0.809992	-0.321287	3.9428e-12	3.51856e-15	chr14	101023191	101023192	MIR299;MIR411	miRNA;miRNA	ENST00000385016.3;ENST00000362239.3	-590;-129	CGI:chr14:101065306-101066047	.
cg15909393	0.492015	0.813239	-0.321224	9.66984e-14	1.31256e-16	chr2	364075	364076	.	.	.	.	CGI:chr2:314828-315170	.
cg05887869	0.499618	0.820826	-0.321207	4.93004e-10	2.64366e-13	chr5	9738536	9738537	CTD-2143L24.1	lincRNA	ENST00000511616.4	165291	CGI:chr5:9546364-9546603	.
cg07851738	0.512947	0.834151	-0.321204	6.25644e-11	4.1359e-14	chr8	130884542	130884543	ADCY8;ADCY8	protein_coding;protein_coding	ENST00000286355.8;ENST00000377928.6	157885;155792	CGI:chr8:131040003-131042503	.
cg08037115	0.47721	0.798344	-0.321134	5.96567e-15	1.12621e-17	chr14	104371204	104371205	.	.	.	.	CGI:chr14:104334107-104334640	.
cg11646259	0.485705	0.806838	-0.321133	2.16223e-11	1.59759e-14	chr7	33987045	33987046	BMPER;BMPER	protein_coding;protein_coding	ENST00000297161.5;ENST00000436222.4	82133;81511	CGI:chr7:33904053-33905897	.
cg03553819	0.536875	0.857975	-0.3211	3.67744e-13	4.29249e-16	chr16	1221741	1221742	CACNA1H;CACNA1H;CACNA1H;TPSG1	protein_coding;protein_coding;protein_coding;protein_coding	ENST00000348261.8;ENST00000358590.7;ENST00000564927.1;ENST00000234798.4	68499;68499;10258;3517	CGI:chr16:1217865-1218605	S_Shelf
cg26026598	0.42967	0.750766	-0.321096	2.44056e-13	2.9737e-16	chr1	181173156	181173157	RP11-540K16.1	lincRNA	ENST00000435023.1	-1329	CGI:chr1:181104781-181105866	.
cg05489054	0.36369	0.684771	-0.321081	1.26713e-18	6.83879e-21	chr10	129415909	129415910	.	.	.	.	CGI:chr10:129466684-129467446	.
cg11583041	0.517012	0.838079	-0.321066	2.35324e-18	1.18508e-20	chr6	169340686	169340687	.	.	.	.	CGI:chr6:169248451-169248952	.
cg15593510	0.452318	0.773361	-0.321043	1.5418e-12	1.52653e-15	chr1	158399322	158399323	OR10T2	protein_coding	ENST00000334438.1	145	CGI:chr1:158180830-158181713	.
cg06452558	0.285795	0.606823	-0.321028	3.70619e-21	4.39717e-23	chr8	1453721	1453722	.	.	.	.	CGI:chr8:1456718-1456928	N_Shelf
cg18519834	0.325696	0.64672	-0.321023	6.48504e-24	2.03566e-25	chr20	61728338	61728339	CDH4;CDH4;CDH4	protein_coding;protein_coding;protein_coding	ENST00000543233.2;ENST00000611855.3;ENST00000614565.3	128576;158202;475911	CGI:chr20:61773042-61773372	.
cg00619561	0.34668	0.667695	-0.321015	1.64639e-14	2.73812e-17	chr13	112326362	112326363	LINC01044	lincRNA	ENST00000413637.1	4864	CGI:chr13:112330652-112331419	.
cg04199720	0.57759	0.898602	-0.321012	1.27242e-09	6.24216e-13	chr16	30343154	30343155	RP11-347C12.12	unprocessed_pseudogene	ENST00000616011.1	6753	CGI:chr16:30334731-30335544	.
cg02020675	0.488667	0.809677	-0.32101	6.30693e-14	8.94963e-17	chr14	92319926	92319927	.	.	.	.	CGI:chr14:92323046-92324368	N_Shelf
cg24384212	0.469842	0.790823	-0.320981	2.29381e-12	2.17099e-15	chr20	32894461	32894462	EFCAB8	protein_coding	ENST00000400522.7	35537	CGI:chr20:32819725-32820318	.
cg02925248	0.448812	0.769793	-0.320981	1.59322e-11	1.21806e-14	chr16	2163748	2163749	TRAF7;TRAF7;TRAF7;TRAF7;TRAF7;TRAF7	protein_coding;protein_coding;protein_coding;protein_coding;protein_coding;protein_coding	ENST00000326181.9;ENST00000564067.4;ENST00000565383.4;ENST00000567645.2;ENST00000567653.4;ENST00000569686.4	7982;7918;8049;205;7943;7969	CGI:chr16:2164221-2165918	N_Shore
cg25586329	0.357918	0.678864	-0.320947	2.89977e-18	1.42645e-20	chr10	131002301	131002302	.	.	.	.	CGI:chr10:131075393-131075612	.
cg00671600	0.446772	0.767706	-0.320934	6.51851e-18	2.87521e-20	chr20	63161091	63161092	.	.	.	.	CGI:chr20:63156808-63157317	S_Shelf
cg18100127	0.461362	0.782284	-0.320922	1.0819e-10	6.76067e-14	chr7	130485923	130485924	MEST;MEST;MEST;MEST;MEST;MEST	protein_coding;protein_coding;protein_coding;protein_coding;protein_coding;protein_coding	ENST00000341441.8;ENST00000378576.7;ENST00000399874.5;ENST00000416162.5;ENST00000427521.4;ENST00000433159.4	-249;-432;-1049;-432;-414;-1204	CGI:chr7:130486176-130486960	N_Shore
cg09127909	0.508868	0.829766	-0.320898	8.18114e-19	4.66732e-21	chr8	1452099	1452100	.	.	.	.	CGI:chr8:1449769-1450355	S_Shore
cg26108621	0.395144	0.716037	-0.320893	9.86765e-14	1.33553e-16	chr13	40116231	40116232	RP11-427J23.1	lincRNA	ENST00000615947.1	157279	CGI:chr13:40172232-40172559	.
cg02987523	0.487874	0.808741	-0.320867	6.99437e-11	4.56978e-14	chr13	103325880	103325881	.	.	.	.	CGI:chr13:102845750-102846413	.
cg05210558	0.490732	0.811585	-0.320854	9.2262e-12	7.49216e-15	chr11	131540985	131540986	AP003025.2;AP003025.2;AP003025.2;NTM;NTM;NTM;NTM	antisense;antisense;antisense;protein_coding;protein_coding;protein_coding;protein_coding	ENST00000414466.4;ENST00000414856.1;ENST00000443319.1;ENST00000374791.6;ENST00000436745.4;ENST00000477098.1;ENST00000550167.4	-117;-386;-368;170506;170358;170355;85521	CGI:chr11:131690462-131690665	.
cg12620035	0.332257	0.653101	-0.320843	9.43362e-17	2.9599e-19	chr7	73833283	73833284	.	.	.	.	CGI:chr7:73831104-73831715	S_Shore
cg05767404	0.348001	0.668793	-0.320793	5.77234e-18	2.59483e-20	chr1	247549289	247549290	GCSAML;GCSAML;GCSAML;GCSAML;GCSAML;GCSAML;GCSAML;GCSAML;GCSAML;GCSAML	protein_coding;protein_coding;protein_coding;protein_coding;protein_coding;protein_coding;protein_coding;protein_coding;protein_coding;protein_coding	ENST00000366488.4;ENST00000366489.4;ENST00000366491.5;ENST00000463359.4;ENST00000526896.4;ENST00000527084.4;ENST00000527541.4;ENST00000529512.4;ENST00000536561.4;ENST00000623578.2	200;42168;42173;30856;42164;42230;42215;30836;42230;30836	CGI:chr1:247530733-247531199	.
cg16462648	0.474666	0.795454	-0.320787	8.7281e-12	7.13663e-15	chr5	56089423	56089424	.	.	.	.	CGI:chr5:55994507-55995561	.
cg24055703	0.410384	0.731159	-0.320775	1.63716e-15	3.65385e-18	chr20	47788936	47788937	.	.	.	.	CGI:chr20:47784998-47786763	S_Shelf
cg12163365	0.533101	0.853858	-0.320757	3.76971e-10	2.07714e-13	chr8	139453339	139453340	.	.	.	.	CGI:chr8:139618853-139619089	.
cg06940505	0.352081	0.67283	-0.320749	3.22175e-17	1.16069e-19	chr1	156907330	156907331	PEAR1;PEAR1;PEAR1	protein_coding;protein_coding;protein_coding	ENST00000292357.7;ENST00000338302.6;ENST00000469390.4	13598;13609;1012	CGI:chr1:156907977-156908350	N_Shore
cg15824094	0.572199	0.892937	-0.320738	6.72664e-10	3.50059e-13	chr1	2497566	2497567	PLCH2;PLCH2;PLCH2;PLCH2;PLCH2;PLCH2;PLCH2	protein_coding;protein_coding;protein_coding;protein_coding;protein_coding;protein_coding;protein_coding	ENST00000278878.6;ENST00000343889.7;ENST00000378486.6;ENST00000419816.5;ENST00000449969.4;ENST00000462379.1;ENST00000473964.4	17677;18475;21250;21250;30106;-1082;-217	CGI:chr1:2502147-2502626	.
cg24441810	0.228583	0.549295	-0.320712	2.38119e-15	5.06021e-18	chr2	119678463	119678464	TMEM177;TMEM177;TMEM177;TMEM177;TMEM177;TMEM177	protein_coding;protein_coding;protein_coding;protein_coding;protein_coding;protein_coding	ENST00000272521.6;ENST00000401466.4;ENST00000409951.1;ENST00000424086.4;ENST00000445518.1;ENST00000496203.4	-708;-705;-741;-705;-729;-741	CGI:chr2:119678954-119679434	N_Shore
cg04303500	0.516902	0.83761	-0.320708	3.76921e-14	5.71711e-17	chr20	61026956	61026957	.	.	.	.	CGI:chr20:61023787-61024249	S_Shelf
cg15517113	0.592874	0.913561	-0.320686	2.26315e-09	1.05207e-12	chr2	620265	620266	.	.	.	.	CGI:chr2:620639-621993	N_Shore
cg08755026	0.449941	0.770612	-0.320671	4.27288e-16	1.11605e-18	chr2	85592491	85592492	VAMP5;VAMP5	protein_coding;protein_coding	ENST00000306384.4;ENST00000462451.1	8082;893	CGI:chr2:85595281-85595860	N_Shelf
cg23202253	0.340231	0.660885	-0.320654	2.90372e-13	3.46979e-16	chr12	26749278	26749279	ITPR2;ITPR2;ITPR2	protein_coding;protein_coding;protein_coding	ENST00000242737.5;ENST00000381340.6;ENST00000545235.1	83504;83921;83509	CGI:chr12:26832549-26833588	.
cg11476737	0.533625	0.854184	-0.320559	1.07118e-11	8.53239e-15	chr10	2772997	2772998	.	.	.	.	CGI:chr10:2772811-2773277	Island
cg12797746	0.260854	0.581401	-0.320546	5.79534e-20	4.65756e-22	chr8	1160520	1160521	CTD-2281E23.2	processed_transcript	ENST00000520524.4	55637	CGI:chr8:1163058-1164073	N_Shelf
cg14566081	0.503162	0.823638	-0.320476	3.06176e-10	1.72147e-13	chr5	1938182	1938183	RP11-259O2.1	lincRNA	ENST00000511693.1	4318	CGI:chr5:1930640-1931872	.
cg03300787	0.406346	0.726738	-0.320392	9.65973e-15	1.72232e-17	chr15	99992997	99992998	ADAMTS17	protein_coding	ENST00000268070.7	349009	CGI:chr15:99992940-99993167	Island
cg06944096	0.543237	0.863621	-0.320384	1.36179e-12	1.36863e-15	chr12	124302818	124302819	FAM101A;FAM101A;FAM101A;FAM101A	protein_coding;protein_coding;protein_coding;protein_coding	ENST00000324038.6;ENST00000389727.6;ENST00000540762.5;ENST00000546355.2	13653;329602;329576;7294	CGI:chr12:124304013-124304338	N_Shore
cg14373988	0.573968	0.894333	-0.320365	3.34742e-09	1.50099e-12	chr1	2413894	2413895	PEX10;PEX10;PEX10;PEX10;PEX10;PEX10	protein_coding;protein_coding;protein_coding;protein_coding;protein_coding;protein_coding	ENST00000288774.6;ENST00000447513.5;ENST00000507596.4;ENST00000508384.4;ENST00000510434.1;ENST00000514502.1	-1363;-1322;-1353;-96;-1358;-1379	CGI:chr1:2414452-2414717	N_Shore
cg21320123	0.493276	0.813625	-0.320349	4.80975e-14	7.08955e-17	chr7	154199973	154199974	DPP6;DPP6;DPP6	protein_coding;protein_coding;protein_coding	ENST00000377770.6;ENST00000404039.4;ENST00000406326.4	147292;312875;147554	CGI:chr7:154304879-154305196	.
cg27235829	0.54387	0.864205	-0.320334	6.6952e-12	5.64709e-15	chr1	158420969	158420970	OR10K2	protein_coding	ENST00000314902.2	-102	CGI:chr1:158180830-158181713	.
cg11253042	0.527691	0.848015	-0.320323	1.66178e-11	1.2647e-14	chr10	2014392	2014393	LINC00700;LINC00700;LINC00700	lincRNA;lincRNA;lincRNA	ENST00000413603.4;ENST00000438372.1;ENST00000454424.1	-43;-43;-980	CGI:chr10:1736590-1737824	.
cg14356919	0.322791	0.643109	-0.320318	9.89245e-14	1.33785e-16	chr21	45471083	45471084	COL18A1;COL18A1;COL18A1	protein_coding;protein_coding;protein_coding	ENST00000355480.8;ENST00000359759.7;ENST00000400337.5	15593;15551;65945	CGI:chr21:45470934-45471201	Island
cg04682087	0.614871	0.935147	-0.320276	7.29332e-08	2.60025e-11	chr2	880260	880261	.	.	.	.	CGI:chr2:868244-869405	.
cg12050706	0.348672	0.668854	-0.320182	3.82753e-14	5.79929e-17	*	-1	-1	.	.	.	.	.	.
cg03887584	0.457754	0.777906	-0.320152	1.90816e-11	1.4301e-14	chr10	96370553	96370554	TLL2	protein_coding	ENST00000357947.3	143359	CGI:chr10:96384542-96384756	.
cg10426658	0.45315	0.773288	-0.320139	1.42656e-16	4.24571e-19	chr14	104564906	104564907	TMEM179	protein_coding	ENST00000415614.5	39854	CGI:chr14:104574970-104575224	.
cg05936249	0.413669	0.733802	-0.320133	1.05538e-17	4.38697e-20	chr10	84197905	84197906	CDHR1;CDHR1	protein_coding;protein_coding	ENST00000332904.6;ENST00000623527.2	3254;3269	CGI:chr10:84194443-84195547	S_Shelf
cg15642035	0.452821	0.772934	-0.320113	3.31552e-12	3.0102e-15	chr8	138152809	138152810	FAM135B;FAM135B;FAM135B;FAM135B	protein_coding;protein_coding;protein_coding;protein_coding	ENST00000276737.9;ENST00000395297.4;ENST00000467365.1;ENST00000482951.5	344014;344014;-404;324613	CGI:chr8:138496552-138497531	.
cg02553039	0.4236	0.743682	-0.320083	2.29884e-15	4.91355e-18	chr22	49167595	49167596	.	.	.	.	CGI:chr22:49168124-49168686	N_Shore
cg03049445	0.457927	0.777998	-0.32007	1.59429e-12	1.57073e-15	chr6	21277723	21277724	.	.	.	.	CGI:chr6:21587190-21588944	.
cg10860802	0.60067	0.920696	-0.320026	2.78278e-08	1.05763e-11	chr7	154840892	154840893	DPP6;DPP6;DPP6;DPP6;DPP6;RP11-476H24.1	protein_coding;protein_coding;protein_coding;protein_coding;protein_coding;antisense	ENST00000332007.6;ENST00000377770.6;ENST00000404039.4;ENST00000427557.1;ENST00000493268.1;ENST00000448767.1	535781;788211;953794;535449;36999;24592	CGI:chr7:154793972-154794626	.
cg19270409	0.3759	0.695903	-0.320004	1.09636e-21	1.57588e-23	chr8	1482587	1482588	.	.	.	.	CGI:chr8:1482586-1483158	Island
cg24188870	0.491076	0.81106	-0.319984	2.43561e-15	5.15239e-18	chr8	1668043	1668044	DLGAP2;DLGAP2;DLGAP2	protein_coding;protein_coding;protein_coding	ENST00000421627.5;ENST00000520901.4;ENST00000612087.1	166676;119398;166676	CGI:chr8:1668355-1668710	N_Shore
cg26113233	0.280974	0.600956	-0.319983	1.49546e-19	1.07037e-21	chr5	175246619	175246620	.	.	.	.	CGI:chr5:175443750-175445342	.
cg13820205	0.325304	0.645259	-0.319955	2.01095e-23	5.11878e-25	chr9	129685761	129685762	PRRX2	protein_coding	ENST00000372469.5	20119	CGI:chr9:129675645-129675877	.
cg14153740	0.517179	0.837079	-0.3199	1.76952e-12	1.72324e-15	chr7	142257882	142257883	PRSS58;PRSS58	protein_coding;protein_coding	ENST00000547058.5;ENST00000552471.1	177;146	CGI:chr7:141738204-141738593	.
cg09171112	0.33113	0.651028	-0.319898	3.99656e-17	1.4023e-19	chr5	167284589	167284590	TENM2	protein_coding	ENST00000518659.4	-211	CGI:chr5:166978479-166978687	.
cg11506843	0.378539	0.69842	-0.319882	5.34065e-25	2.52598e-26	*	-1	-1	.	.	.	.	.	.
cg02732164	0.431412	0.751261	-0.319849	8.20298e-22	1.21654e-23	chr7	6829504	6829505	.	.	.	.	CGI:chr7:6825879-6826463	S_Shelf
cg02369450	0.607447	0.927288	-0.31984	2.32716e-09	1.07882e-12	chr5	1950098	1950099	RP11-259O2.1;RP11-259O2.1	lincRNA;lincRNA	ENST00000511693.1;ENST00000513419.1	16234;10325	CGI:chr5:1950510-1951557	N_Shore
cg08393516	0.523123	0.842888	-0.319765	6.76044e-12	5.6954e-15	chr4	993320	993321	IDUA;IDUA;IDUA;IDUA;IDUA;IDUA;IDUA;IDUA;SLC26A1;SLC26A1;SLC26A1;SLC26A1	protein_coding;protein_coding;protein_coding;protein_coding;protein_coding;protein_coding;protein_coding;protein_coding;protein_coding;protein_coding;protein_coding;protein_coding	ENST00000247933.7;ENST00000502910.4;ENST00000504568.4;ENST00000506561.4;ENST00000508168.4;ENST00000509948.4;ENST00000514192.4;ENST00000514698.4;ENST00000361661.5;ENST00000398516.2;ENST00000398520.5;ENST00000622731.3	6322;6275;6232;6243;6253;1447;1494;6275;117;121;57;121	CGI:chr4:991138-991907	S_Shore
cg00650953	0.426938	0.74668	-0.319742	2.50635e-16	6.99261e-19	chr7	147803411	147803412	CNTNAP2;CNTNAP2;CNTNAP2	protein_coding;protein_coding;protein_coding	ENST00000361727.6;ENST00000455301.2;ENST00000627772.1	1687051;164136;164601	CGI:chr7:148339402-148339756	.
cg14200127	0.244314	0.564053	-0.319739	2.60409e-24	9.59402e-26	chr1	97138626	97138627	DPYD;DPYD-AS1	protein_coding;antisense	ENST00000370192.6;ENST00000422980.1	782398;42702	CGI:chr1:96721546-96722263	.
cg25449283	0.336552	0.656291	-0.319738	1.08014e-15	2.53384e-18	chr7	143139607	143139608	PIP	protein_coding	ENST00000291009.3	7529	CGI:chr7:143287954-143288717	.
cg05807849	0.361047	0.680755	-0.319708	4.9448e-16	1.27022e-18	chr11	133076797	133076798	OPCML;OPCML	protein_coding;protein_coding	ENST00000524381.4;ENST00000529038.4	455723;455606	CGI:chr11:133081797-133082312	.
cg19308227	0.481952	0.801614	-0.319662	9.10373e-14	1.24368e-16	chr1	6146263	6146264	CHD5;CHD5	protein_coding;protein_coding	ENST00000262450.6;ENST00000496404.1	33861;33761	CGI:chr1:6148656-6148979	N_Shelf
cg15974196	0.414458	0.734095	-0.319638	2.93963e-14	4.58294e-17	chr5	11791616	11791617	CTNND2;CTNND2;CTNND2;CTNND2;CTNND2;CTNND2;CTNND2	protein_coding;protein_coding;protein_coding;protein_coding;protein_coding;protein_coding;protein_coding	ENST00000304623.11;ENST00000502551.4;ENST00000504499.4;ENST00000508761.1;ENST00000509868.1;ENST00000511278.4;ENST00000513588.4	112428;111627;112428;111770;112364;111577;112365	CGI:chr5:11903438-11904591	.
cg24751154	0.571332	0.890886	-0.319554	4.29499e-07	1.38823e-10	chr5	3191773	3191774	.	.	.	.	CGI:chr5:3187985-3188261	S_Shelf
cg22498453	0.506583	0.82613	-0.319547	6.98468e-13	7.58145e-16	chr7	99207461	99207462	KPNA7	protein_coding	ENST00000327442.6	46	CGI:chr7:99143455-99144367	.
cg13917918	0.476571	0.796117	-0.319546	2.98022e-12	2.7435e-15	chr9	134781205	134781206	COL5A1;COL5A1	protein_coding;protein_coding	ENST00000371817.6;ENST00000618395.3	139430;139399	CGI:chr9:134768667-134768896	.
cg06400301	0.284486	0.603945	-0.319459	5.57545e-17	1.87365e-19	chr1	248275267	248275268	OR2T33	protein_coding	ENST00000318021.3	-1452	CGI:chr1:247937023-247937424	.
cg22347967	0.327147	0.646587	-0.31944	1.50323e-15	3.38892e-18	chr12	127757429	127757430	.	.	.	.	CGI:chr12:127761047-127761291	N_Shelf
cg24359868	0.521894	0.84132	-0.319426	9.34647e-13	9.78688e-16	chr21	28889202	28889203	HSPD1P7	processed_pseudogene	ENST00000447985.1	71	CGI:chr21:28885103-28885359	S_Shelf
cg08636922	0.450194	0.769613	-0.319419	2.72196e-17	1.00508e-19	chr21	45000536	45000537	LINC00162	lincRNA	ENST00000615826.1	4192	CGI:chr21:45001301-45001608	N_Shore
cg20345923	0.457726	0.777119	-0.319393	1.8759e-14	3.07669e-17	chr2	1979418	1979419	MYT1L;MYT1L;MYT1L	protein_coding;protein_coding;protein_coding	ENST00000399161.5;ENST00000428368.5;ENST00000485348.1	351777;351699;133	CGI:chr2:1937296-1937788	.
cg03269363	0.485594	0.804986	-0.319393	1.41117e-14	2.39529e-17	chr22	49614077	49614078	C22orf34;C22orf34;RP1-29C18.8	lincRNA;lincRNA;sense_intronic	ENST00000414287.4;ENST00000416411.1;ENST00000420902.1	43428;43381;1640	CGI:chr22:49615310-49616064	N_Shore
cg10024799	0.489975	0.809364	-0.319389	4.4288e-10	2.40241e-13	chr12	2532215	2532216	CACNA1C;CACNA1C;CACNA1C;CACNA1C;CACNA1C;CACNA1C;CACNA1C;CACNA1C;CACNA1C;CACNA1C;CACNA1C;CACNA1C;CACNA1C;CACNA1C;CACNA1C;CACNA1C;CACNA1C;CACNA1C;CACNA1C;CACNA1C;CACNA1C;CACNA1C;CACNA1C;CACNA1C;CACNA1C;CACNA1C;CACNA1C;CACNA1C;CACNA1C	protein_coding;protein_coding;protein_coding;protein_coding;protein_coding;protein_coding;protein_coding;protein_coding;protein_coding;protein_coding;protein_coding;protein_coding;protein_coding;protein_coding;protein_coding;protein_coding;protein_coding;protein_coding;protein_coding;protein_coding;protein_coding;protein_coding;protein_coding;protein_coding;protein_coding;protein_coding;protein_c…	ENST00000327702.10;ENST00000335762.8;ENST00000344100.6;ENST00000347598.7;ENST00000399591.4;ENST00000399595.4;ENST00000399597.4;ENST00000399601.4;ENST00000399603.4;ENST00000399606.4;ENST00000399617.4;ENST00000399621.4;ENST00000399629.4;ENST00000399634.4;ENST00000399637.4;ENST00000399638.4;ENST00000399641.4;ENST00000399644.4;ENST00000399649.4;ENST00000399655.4;ENST00000402845.6;ENST00000406454.6;EN…	478651;478916;478651;478651;478651;478651;478651;478651;478651;478651;478651;478651;478651;478651;478651;478651;478651;478651;478651;478916;478651;478651;478676;27778;83238;83238;83238;83238;83238	CGI:chr12:2679448-2679713	.
cg03522247	0.641751	0.96114	-0.319389	2.22467e-12	2.11298e-15	chr12	33052495	33052496	.	.	.	.	CGI:chr12:32896367-32897109	.
cg09739536	0.495409	0.814737	-0.319328	3.27535e-15	6.68829e-18	chr5	178912444	178912445	ZFP2;ZFP2;ZFP2;ZFP2;ZFP2	protein_coding;protein_coding;protein_coding;protein_coding;protein_coding	ENST00000361362.5;ENST00000520301.4;ENST00000520660.4;ENST00000520805.4;ENST00000523286.1	16549;-263;16545;16528;-263	CGI:chr5:178895712-178896537	.
cg10256733	0.540437	0.85976	-0.319323	1.36412e-10	8.33741e-14	chr2	1876102	1876103	MYT1L;MYT1L	protein_coding;protein_coding	ENST00000399161.5;ENST00000428368.5	455093;455015	CGI:chr2:1891925-1892160	.
cg03424345	0.358813	0.678115	-0.319302	6.90592e-17	2.25368e-19	chr12	129926727	129926728	.	.	.	.	CGI:chr12:129903064-129904230	.
cg14288639	0.483788	0.803077	-0.319289	1.72183e-12	1.68194e-15	chr9	119589131	119589132	.	.	.	.	CGI:chr9:119368808-119369936	.
cg16572957	0.429598	0.748872	-0.319274	4.66862e-20	3.85381e-22	chr1	2882789	2882790	.	.	.	.	CGI:chr1:2860592-2860796	.
cg19954978	0.464953	0.784225	-0.319272	2.44303e-13	2.97619e-16	chr5	176806843	176806844	.	.	.	.	CGI:chr5:176809760-176811080	N_Shelf
cg25072962	0.39297	0.712233	-0.319263	8.25048e-16	2.00182e-18	chr11	60757102	60757103	MS4A15;MS4A15;MS4A15;MS4A15	protein_coding;protein_coding;protein_coding;protein_coding	ENST00000337911.7;ENST00000405633.3;ENST00000429322.5;ENST00000528170.4	98;93;97;148	CGI:chr11:60767437-60767665	.
cg18640514	0.338908	0.658138	-0.31923	3.18284e-16	8.63561e-19	chr7	53596553	53596554	.	.	.	.	CGI:chr7:53219158-53219499	.
cg10194573	0.484537	0.803747	-0.319209	1.89353e-13	2.38394e-16	chr1	152757950	152757951	LCE1B	protein_coding	ENST00000615904.1	20431	CGI:chr1:152515581-152515794	.
cg08247552	0.581495	0.900701	-0.319206	3.21171e-14	4.95985e-17	chr8	1315924	1315925	.	.	.	.	CGI:chr8:1315257-1318172	Island
cg13979884	0.311536	0.630688	-0.319152	1.81267e-15	4.00022e-18	chr9	71446255	71446256	TRPM3;TRPM3	protein_coding;protein_coding	ENST00000354500.5;ENST00000357533.5	650;581	CGI:chr9:71446597-71447181	N_Shore
cg26630859	0.494096	0.813243	-0.319146	3.12146e-12	2.85736e-15	chr5	174311312	174311313	.	.	.	.	CGI:chr5:174311900-174312531	N_Shore
cg06231581	0.482885	0.802027	-0.319142	1.61859e-11	1.23556e-14	chr13	112249379	112249380	.	.	.	.	CGI:chr13:112241113-112241394	.
cg09959790	0.507259	0.826395	-0.319136	8.15251e-12	6.71937e-15	chr13	59042803	59042804	.	.	.	.	CGI:chr13:60163526-60164151	.
cg19603100	0.490128	0.809236	-0.319107	1.84478e-13	2.33053e-16	chr14	101023648	101023649	AL132709.2;MIR299	miRNA;miRNA	ENST00000362112.3;ENST00000385016.3	-1353;-133	CGI:chr14:101065306-101066047	.
cg23931819	0.453801	0.7729	-0.3191	5.65182e-11	3.78265e-14	chr1	1309696	1309697	ACAP3;PUSL1;PUSL1;PUSL1;PUSL1;PUSL1	protein_coding;protein_coding;protein_coding;protein_coding;protein_coding;protein_coding	ENST00000472541.4;ENST00000379031.8;ENST00000463758.1;ENST00000467712.1;ENST00000470520.4;ENST00000493657.1	-86;1128;907;874;1084;460	CGI:chr1:1307020-1309805	Island
cg14898177	0.471355	0.790419	-0.319064	3.69904e-16	9.84066e-19	chr12	2377468	2377469	CACNA1C;CACNA1C;CACNA1C;CACNA1C;CACNA1C;CACNA1C;CACNA1C;CACNA1C;CACNA1C;CACNA1C;CACNA1C;CACNA1C;CACNA1C;CACNA1C;CACNA1C;CACNA1C;CACNA1C;CACNA1C;CACNA1C;CACNA1C;CACNA1C;CACNA1C;CACNA1C	protein_coding;protein_coding;protein_coding;protein_coding;protein_coding;protein_coding;protein_coding;protein_coding;protein_coding;protein_coding;protein_coding;protein_coding;protein_coding;protein_coding;protein_coding;protein_coding;protein_coding;protein_coding;protein_coding;protein_coding;protein_coding;protein_coding;protein_coding	ENST00000327702.10;ENST00000335762.8;ENST00000344100.6;ENST00000347598.7;ENST00000399591.4;ENST00000399595.4;ENST00000399597.4;ENST00000399601.4;ENST00000399603.4;ENST00000399606.4;ENST00000399617.4;ENST00000399621.4;ENST00000399629.4;ENST00000399634.4;ENST00000399637.4;ENST00000399638.4;ENST00000399641.4;ENST00000399644.4;ENST00000399649.4;ENST00000399655.4;ENST00000402845.6;ENST00000406454.6;EN…	323904;324169;323904;323904;323904;323904;323904;323904;323904;323904;323904;323904;323904;323904;323904;323904;323904;323904;323904;324169;323904;323904;323929	CGI:chr12:2229996-2230449	.
cg10803767	0.437233	0.756254	-0.319021	1.48182e-15	3.34712e-18	chr2	230824208	230824209	.	.	.	.	CGI:chr2:230827982-230828781	N_Shelf
cg17281031	0.44285	0.761859	-0.31901	2.82625e-16	7.75529e-19	chr12	127738671	127738672	.	.	.	.	CGI:chr12:127761047-127761291	.
cg02722637	0.383359	0.702347	-0.318988	7.04585e-17	2.29187e-19	chr12	4812904	4812905	GALNT8;GALNT8;GALNT8;KCNA6	protein_coding;protein_coding;protein_coding;protein_coding	ENST00000433855.1;ENST00000541339.2;ENST00000542998.4;ENST00000280684.3	3727;-1434;49559;3727	CGI:chr12:4809107-4810491	S_Shelf
cg07525077	0.357045	0.676031	-0.318985	3.78673e-18	1.79587e-20	chr14	20891784	20891785	RNASE3	protein_coding	ENST00000304639.3	384	CGI:chr14:20971419-20971749	.
cg06999799	0.632457	0.951441	-0.318984	2.96978e-10	1.67399e-13	chr5	1177190	1177191	CTD-3080P12.3;CTD-3080P12.3;CTD-3080P12.3	antisense;antisense;antisense	ENST00000505972.2;ENST00000512572.1;ENST00000514376.1	1357;1405;1416	CGI:chr5:1170587-1170826	.
cg01132653	0.511639	0.830606	-0.318967	2.51347e-13	3.05192e-16	chr14	101023312	101023313	MIR299;MIR411	miRNA;miRNA	ENST00000385016.3;ENST00000362239.3	-469;-8	CGI:chr14:101065306-101066047	.
cg11761200	0.468364	0.787315	-0.318951	6.36637e-11	4.19866e-14	chr2	79122844	79122845	REG1A;REG1A	protein_coding;protein_coding	ENST00000233735.1;ENST00000485184.1	2385;2008	CGI:chr2:78993066-78993466	.
cg04094178	0.314578	0.633523	-0.318946	3.99804e-22	6.61614e-24	chr1	4135509	4135510	.	.	.	.	CGI:chr1:4132573-4133183	S_Shelf
cg17590227	0.391969	0.71089	-0.318921	8.66474e-16	2.09149e-18	chr8	131188936	131188937	.	.	.	.	CGI:chr8:131040003-131042503	.
cg21831612	0.602604	0.921517	-0.318913	8.61862e-15	1.55731e-17	*	-1	-1	.	.	.	.	.	.
cg26959384	0.402921	0.721831	-0.31891	5.45656e-17	1.83899e-19	chr19	56761253	56761254	ZIM2-AS1	antisense	ENST00000594400.4	53959	CGI:chr19:56765246-56765574	N_Shelf
cg27097992	0.563866	0.882756	-0.31889	1.18397e-07	4.09395e-11	chr14	104334613	104334614	.	.	.	.	CGI:chr14:104334107-104334640	Island
cg04943065	0.452459	0.771341	-0.318882	1.69932e-14	2.81811e-17	chr16	58862956	58862957	RP11-410D17.2;RP11-700H13.1;RP11-700H13.1	lincRNA;lincRNA;lincRNA	ENST00000500117.1;ENST00000562304.1;ENST00000569328.1	113317;17081;17258	CGI:chr16:58733543-58734424	.
cg22922861	0.537601	0.856447	-0.318846	8.35843e-10	4.26357e-13	chr7	155494678	155494679	CNPY1	protein_coding	ENST00000406197.4	39161	CGI:chr7:155491323-155491661	S_Shelf
cg20448594	0.348722	0.667512	-0.31879	3.22871e-13	3.81902e-16	chr7	74526022	74526023	GTF2IRD1;GTF2IRD1;GTF2IRD1;GTF2IRD1;GTF2IRD1	protein_coding;protein_coding;protein_coding;protein_coding;protein_coding	ENST00000265755.6;ENST00000424337.5;ENST00000455841.5;ENST00000476977.4;ENST00000489094.1	72231;71912;72051;20029;17946	CGI:chr7:74480485-74480780	.
cg02237540	0.596584	0.91536	-0.318777	3.75574e-09	1.66858e-12	chr4	626076	626077	PDE6B;PDE6B	protein_coding;protein_coding	ENST00000255622.9;ENST00000496514.4	491;469	CGI:chr4:625724-626123	Island
cg26628811	0.561506	0.880242	-0.318736	2.51343e-14	3.98596e-17	chr8	1182142	1182143	CTD-2281E23.2	processed_transcript	ENST00000520524.4	77259	CGI:chr8:1182761-1182983	N_Shore
cg15595525	0.444526	0.763237	-0.318711	2.14554e-11	1.5866e-14	chr10	133130942	133130943	GPR123;GPR123;GPR123	protein_coding;protein_coding;protein_coding	ENST00000392606.2;ENST00000392607.6;ENST00000607359.4	28695;43036;60012	CGI:chr10:133131007-133131288	N_Shore
cg10996368	0.465357	0.784054	-0.318697	5.44278e-17	1.837e-19	*	-1	-1	.	.	.	.	.	.
cg13637269	0.537265	0.855952	-0.318687	4.43362e-13	5.07694e-16	chr19	22514528	22514529	ZNF98;ZNF98	protein_coding;protein_coding	ENST00000593802.1;ENST00000599879.1	17958;17958	CGI:chr19:22517594-22518459	N_Shelf
cg25042465	0.47808	0.796765	-0.318685	3.82488e-14	5.79653e-17	chr8	49913142	49913143	SNTG1;SNTG1;SNTG1;SNTG1;SNTG1;SNTG1	protein_coding;protein_coding;protein_coding;protein_coding;protein_coding;protein_coding	ENST00000517473.4;ENST00000518864.4;ENST00000520697.1;ENST00000521316.4;ENST00000522124.4;ENST00000523085.4	1104;3352;2192;965;1468;996	CGI:chr8:49909710-49910300	S_Shelf
cg02650767	0.29049	0.609043	-0.318553	1.89185e-24	7.35719e-26	chr1	247451908	247451909	OR2B11	protein_coding	ENST00000318749.7	75	CGI:chr1:247451393-247451642	S_Shore
cg13215579	0.619469	0.938008	-0.318539	2.8299e-08	1.07373e-11	chr14	25431339	25431340	RP11-388G3.1	processed_pseudogene	ENST00000547237.1	896	CGI:chr14:25049218-25050406	.
cg20236424	0.494652	0.813183	-0.318531	2.22022e-10	1.28826e-13	chr13	101258460	101258461	NALCN;NALCN;NALCN	protein_coding;protein_coding;protein_coding	ENST00000251127.9;ENST00000470333.1;ENST00000497170.4	157896;158033;158003	CGI:chr13:101415765-101416907	.
cg07471018	0.502115	0.820574	-0.318458	9.63606e-10	4.85898e-13	chr4	46909533	46909534	COX7B2;COX7B2;COX7B2	protein_coding;protein_coding;protein_coding	ENST00000355591.6;ENST00000396533.4;ENST00000505102.1	-301;-325;-297	CGI:chr4:46993111-46993855	.
cg09435411	0.459105	0.777551	-0.318446	1.65713e-16	4.83733e-19	chr16	49022763	49022764	.	.	.	.	CGI:chr16:48810640-48811353	.
cg18565795	0.510748	0.829179	-0.31843	1.91048e-13	2.40096e-16	chr10	25061873	25061874	ENKUR	protein_coding	ENST00000615958.3	407	CGI:chr10:25016389-25017095	.
cg23182836	0.413382	0.731806	-0.318423	9.49696e-18	3.99032e-20	chr20	64325545	64325546	.	.	.	.	CGI:chr20:64327620-64328160	N_Shelf
cg22730004	0.280441	0.598863	-0.318422	2.21145e-15	4.74257e-18	chr1	158686928	158686929	SPTA1;SPTA1;SPTA1	protein_coding;protein_coding;protein_coding	ENST00000368147.7;ENST00000467387.1;ENST00000614909.3	-229;-319;-229	CGI:chr1:159171412-159171928	.
cg25605102	0.48396	0.802382	-0.318422	1.70413e-11	1.29213e-14	chr8	1379270	1379271	.	.	.	.	CGI:chr8:1379165-1379381	Island
cg00485202	0.61774	0.936111	-0.318371	8.47165e-10	4.31755e-13	chr15	99992576	99992577	ADAMTS17	protein_coding	ENST00000268070.7	349430	CGI:chr15:99992940-99993167	N_Shore
cg25626375	0.305176	0.623428	-0.318252	3.0478e-17	1.10428e-19	chr8	132060022	132060023	OC90;RP11-240B13.2	protein_coding;protein_coding	ENST00000254627.3;ENST00000262283.5	-641;25634	CGI:chr8:132129318-132129569	.
cg06466839	0.388142	0.706376	-0.318234	5.75409e-17	1.92444e-19	chr11	129192382	129192383	ARHGAP32;ARHGAP32	protein_coding;protein_coding	ENST00000310343.12;ENST00000525234.1	-183;86943	CGI:chr11:129278602-129280022	.
cg10191581	0.539232	0.857448	-0.318216	6.26436e-13	6.88716e-16	chr21	30882793	30882794	KRTAP11-1	protein_coding	ENST00000332378.5	-1237	CGI:chr21:31251828-31252066	.
cg10503199	0.500992	0.819189	-0.318197	1.84461e-13	2.33053e-16	chr10	130785955	130785956	.	.	.	.	CGI:chr10:130785456-130785900	S_Shore
cg18087023	0.508014	0.826157	-0.318143	3.19484e-12	2.915e-15	chr1	153042480	153042481	SPRR2D;SPRR2D;SPRR2D;SPRR2D	protein_coding;protein_coding;protein_coding;protein_coding	ENST00000360379.3;ENST00000368756.1;ENST00000368757.1;ENST00000368758.3	-1361;-551;-548;-548	CGI:chr1:153260996-153261837	.
cg18324824	0.502558	0.820467	-0.317909	2.05986e-14	3.34006e-17	chr10	116124716	116124717	GFRA1;GFRA1;GFRA1;GFRA1	protein_coding;protein_coding;protein_coding;protein_coding	ENST00000355422.9;ENST00000369234.4;ENST00000369236.4;ENST00000439649.6	148752;148318;147567;148569	CGI:chr10:116125302-116125518	N_Shore
cg13419869	0.359001	0.676892	-0.317891	2.23106e-17	8.46014e-20	chr1	200894558	200894559	C1orf106;C1orf106;C1orf106;C1orf106	protein_coding;protein_coding;protein_coding;protein_coding	ENST00000367342.7;ENST00000413687.2;ENST00000451872.5;ENST00000532631.4	3216;-264;3483;3509	CGI:chr1:200890948-200891448	S_Shelf
cg11454459	0.451883	0.769749	-0.317867	7.23066e-17	2.34544e-19	chr10	30183119	30183120	.	.	.	.	CGI:chr10:30058670-30059719	.
cg06772221	0.34844	0.666282	-0.317843	1.94373e-22	3.56181e-24	chr8	133049947	133049948	SLA;SLA;SLA;SLA;SLA;SLA;SLA;SLA;SLA;SLA;SLA;SLA;SLA;TG;TG;TG;TG	protein_coding;protein_coding;protein_coding;protein_coding;protein_coding;protein_coding;protein_coding;protein_coding;protein_coding;protein_coding;protein_coding;protein_coding;protein_coding;protein_coding;protein_coding;protein_coding;protein_coding	ENST00000338087.8;ENST00000395352.6;ENST00000427060.5;ENST00000517648.4;ENST00000518565.4;ENST00000519341.4;ENST00000520106.4;ENST00000521823.4;ENST00000522002.4;ENST00000522119.4;ENST00000522432.4;ENST00000523224.4;ENST00000524345.4;ENST00000220616.7;ENST00000519178.4;ENST00000519543.4;ENST00000523756.4	53108;52966;10412;52666;52930;52717;25081;52682;25007;52531;25089;25013;52682;182985;130506;85339;152257	CGI:chr8:133296323-133297902	.
cg01041256	0.524302	0.84208	-0.317778	5.87169e-12	5.02898e-15	chr15	26880433	26880434	GABRA5;GABRA5;GABRA5;GABRA5;GABRA5;GABRA5;GABRA5;GABRA5;GABRA5;GABRB3	protein_coding;protein_coding;protein_coding;protein_coding;protein_coding;protein_coding;protein_coding;protein_coding;protein_coding;protein_coding	ENST00000335625.8;ENST00000355395.8;ENST00000400081.6;ENST00000554038.4;ENST00000554083.1;ENST00000554596.4;ENST00000554599.4;ENST00000555182.4;ENST00000557449.4;ENST00000541819.5	14069;13521;13306;13269;-111;13190;11717;13360;13187;59107	CGI:chr15:26891768-26892013	.
cg26337559	0.546107	0.863877	-0.317769	1.96842e-09	9.27625e-13	chr8	142454374	142454375	BAI1;BAI1	protein_coding;protein_coding	ENST00000517894.4;ENST00000521208.4	4943;4694	CGI:chr8:142454123-142454531	Island
cg03105070	0.457038	0.774774	-0.317737	7.39564e-13	7.9805e-16	chr6	31138067	31138068	PSORS1C1;PSORS1C1;PSORS1C1;PSORS1C1;PSORS1C1;PSORS1C1;PSORS1C2	protein_coding;protein_coding;protein_coding;protein_coding;protein_coding;protein_coding;protein_coding	ENST00000259881.9;ENST00000479581.4;ENST00000481450.2;ENST00000547221.1;ENST00000550838.1;ENST00000552747.1;ENST00000259845.4	23235;23235;-291;417;23232;23227;1284	CGI:chr6:31158308-31158784	.
cg22860195	0.396755	0.714421	-0.317666	1.92897e-16	5.5191e-19	chr2	364258	364259	.	.	.	.	CGI:chr2:314828-315170	.
cg19415202	0.351525	0.669175	-0.31765	1.64172e-17	6.43812e-20	chr11	133836461	133836462	.	.	.	.	CGI:chr11:133832650-133833813	S_Shelf
cg10631530	0.513224	0.830864	-0.31764	2.88218e-11	2.06862e-14	chr5	179374331	179374332	.	.	.	.	CGI:chr5:179374297-179374815	Island
cg01182430	0.508061	0.825676	-0.317614	1.81423e-13	2.29566e-16	chr18	77968594	77968595	.	.	.	.	CGI:chr18:77978538-77978945	.
cg09231675	0.544875	0.862467	-0.317592	1.15297e-11	9.09795e-15	chr17	81556616	81556617	.	.	.	.	CGI:chr17:81551790-81552938	S_Shelf
cg17940268	0.525225	0.842801	-0.317576	2.10203e-11	1.55821e-14	chr1	166154869	166154870	FAM78B;FAM78B;FAM78B;FAM78B;FAM78B;MIR921;RP11-9L18.3	protein_coding;protein_coding;protein_coding;protein_coding;protein_coding;miRNA;sense_intronic	ENST00000338353.3;ENST00000354422.3;ENST00000435676.2;ENST00000441649.1;ENST00000456900.1;ENST00000401133.1;ENST00000451784.1	12101;11847;11357;11366;11513;-70;10227	CGI:chr1:166165021-166167211	.
cg00350503	0.437211	0.75478	-0.317569	1.34215e-20	1.31216e-22	chr19	13502800	13502801	CACNA1A;CACNA1A;CACNA1A;CACNA1A	protein_coding;protein_coding;protein_coding;protein_coding	ENST00000360228.8;ENST00000573710.5;ENST00000574974.1;ENST00000614285.3	3425;3704;121191;3425	CGI:chr19:13505938-13506453	N_Shelf
cg23785114	0.514606	0.832175	-0.317569	4.04701e-13	4.68094e-16	chr8	1203402	1203403	CTD-2281E23.2	processed_transcript	ENST00000520524.4	98519	CGI:chr8:1200825-1201237	S_Shelf
cg16162122	0.361307	0.678863	-0.317556	8.96144e-15	1.61158e-17	chr20	63458917	63458918	KCNQ2;KCNQ2;KCNQ2;KCNQ2;KCNQ2;KCNQ2;KCNQ2;KCNQ2;KCNQ2;KCNQ2;KCNQ2	protein_coding;protein_coding;protein_coding;protein_coding;protein_coding;protein_coding;protein_coding;protein_coding;protein_coding;protein_coding;protein_coding	ENST00000344425.6;ENST00000344462.7;ENST00000359125.5;ENST00000360480.6;ENST00000370221.2;ENST00000370224.4;ENST00000625514.1;ENST00000626313.1;ENST00000626839.1;ENST00000629241.1;ENST00000629676.1	13724;13593;13674;13589;13673;13682;13639;1132;13761;13639;13639	CGI:chr20:63460973-63461233	N_Shelf
cg14569837	0.444488	0.762036	-0.317549	4.18198e-14	6.27118e-17	chr11	56030730	56030731	OR5AS1	protein_coding	ENST00000313555.1	310	CGI:chr11:55874234-55874644	.
cg03236627	0.465805	0.783283	-0.317478	1.18978e-16	3.62896e-19	chr11	44764554	44764555	TSPAN18;TSPAN18;TSPAN18;TSPAN18;TSPAN18;TSPAN18	protein_coding;protein_coding;protein_coding;protein_coding;protein_coding;protein_coding	ENST00000340160.6;ENST00000520358.5;ENST00000520999.5;ENST00000533080.4;ENST00000533202.4;ENST00000533786.4	127;37441;37379;37450;37742;38088	CGI:chr11:44726967-44728211	.
cg13027458	0.3713	0.688705	-0.317405	2.48493e-17	9.29194e-20	chr16	59755315	59755316	APOOP5;APOOP5;APOOP5	transcribed_processed_pseudogene;transcribed_processed_pseudogene;transcribed_processed_pseudogene	ENST00000564533.2;ENST00000564761.3;ENST00000565921.3	-500;-288;-466	CGI:chr16:59754888-59755168	S_Shore
cg00375608	0.483066	0.800452	-0.317386	2.23597e-11	1.64513e-14	chr7	1568151	1568152	PSMG3;PSMG3;PSMG3	protein_coding;protein_coding;protein_coding	ENST00000252329.3;ENST00000288607.2;ENST00000404674.6	2855;1843;1895	CGI:chr7:1569789-1570401	N_Shore
cg18257955	0.458222	0.775602	-0.31738	3.22718e-14	4.97802e-17	chr15	25209055	25209056	SNHG14;SNHG14;SNHG14;SNORD115-22	processed_transcript;processed_transcript;processed_transcript;snoRNA	ENST00000424208.4;ENST00000424333.4;ENST00000450809.1;ENST00000364456.1	27211;11626;2974;-864	CGI:chr15:25438248-25439268	.
cg03661324	0.266628	0.583987	-0.317359	3.03342e-19	1.96793e-21	chr2	79184791	79184792	AC011754.1;CTNNA2	sense_overlapping;protein_coding	ENST00000415201.1;ENST00000466387.4	26416;-441	CGI:chr2:78993066-78993466	.
cg03304660	0.469505	0.786822	-0.317317	4.85179e-13	5.50268e-16	chr7	157793527	157793528	PTPRN2;PTPRN2;PTPRN2;PTPRN2	protein_coding;protein_coding;protein_coding;protein_coding	ENST00000389413.6;ENST00000389416.7;ENST00000389418.7;ENST00000409483.4	794247;794185;794153;794262	CGI:chr7:157794019-157794420	N_Shore
cg13678205	0.404537	0.721822	-0.317285	2.82539e-17	1.0344e-19	chr9	137880589	137880590	CACNA1B;CACNA1B;CACNA1B;CACNA1B;CACNA1B;CACNA1B;RP11-188C12.3	protein_coding;protein_coding;protein_coding;protein_coding;protein_coding;protein_coding;antisense	ENST00000277549.8;ENST00000277551.5;ENST00000371355.7;ENST00000371357.4;ENST00000371363.4;ENST00000371372.4;ENST00000371390.1	2799;2799;2654;2654;2773;2799;11982	CGI:chr9:137876848-137879061	S_Shore
cg12510512	0.462562	0.779825	-0.317263	2.06333e-17	7.90548e-20	chr7	1677551	1677552	.	.	.	.	CGI:chr7:1664225-1670881	.
cg19561972	0.538924	0.856169	-0.317245	5.73103e-11	3.83022e-14	chr12	130226881	130226882	.	.	.	.	CGI:chr12:130160782-130164443	.
cg00526273	0.547358	0.864562	-0.317204	9.48164e-15	1.69445e-17	chr20	61289693	61289694	CDH4	protein_coding	ENST00000614565.3	37266	CGI:chr20:61289692-61290013	Island
cg10719363	0.520673	0.837838	-0.317165	1.22674e-11	9.62041e-15	chr7	157522041	157522042	.	.	.	.	CGI:chr7:157525532-157525807	N_Shelf
cg18501230	0.323986	0.641147	-0.317161	2.23396e-20	2.01517e-22	chr8	1390540	1390541	.	.	.	.	CGI:chr8:1393054-1394000	N_Shelf
cg15033552	0.338225	0.655335	-0.317111	9.43583e-14	1.28354e-16	chr1	223701439	223701440	CAPN2;CAPN2	protein_coding;protein_coding	ENST00000433674.5;ENST00000434648.4	-155;-207	CGI:chr1:223712288-223713121	.
cg19180555	0.448729	0.765817	-0.317088	2.85571e-12	2.63775e-15	chr12	5873129	5873130	ANO2;ANO2;ANO2;ANO2	protein_coding;protein_coding;protein_coding;protein_coding	ENST00000327087.11;ENST00000356134.8;ENST00000541487.1;ENST00000546188.4	73104;73104;8678;72131	CGI:chr12:5827710-5827919	.
cg01282174	0.317417	0.634504	-0.317087	2.20628e-21	2.82339e-23	chr11	119759435	119759436	.	.	.	.	CGI:chr11:119741381-119741766	.
cg12072262	0.581843	0.898909	-0.317066	2.94206e-08	1.11315e-11	chr10	127581089	127581090	.	.	.	.	CGI:chr10:127736146-127739102	.
cg02939767	0.492249	0.809305	-0.317056	7.25433e-11	4.72375e-14	chr20	604129	604130	TCF15	protein_coding	ENST00000246080.3	6270	CGI:chr20:609578-610578	.
cg00187686	0.386289	0.703323	-0.317034	4.00675e-16	1.0552e-18	chr11	59866745	59866746	TCN1;TCN1;TCN1	protein_coding;protein_coding;protein_coding	ENST00000257264.3;ENST00000532419.4;ENST00000534531.1	-169;-255;-273	CGI:chr11:59898106-59898384	.
cg05123257	0.523545	0.840566	-0.317021	4.4747e-14	6.64747e-17	chr16	88130273	88130274	.	.	.	.	CGI:chr16:88130078-88130312	Island
cg18682226	0.401835	0.718821	-0.316986	8.51483e-22	1.25746e-23	chr7	72333443	72333444	CALN1;CALN1;CALN1;CALN1;CALN1	protein_coding;protein_coding;protein_coding;protein_coding;protein_coding	ENST00000329008.8;ENST00000395275.5;ENST00000395276.5;ENST00000431984.4;ENST00000446128.1	3553;78931;113619;113709;4309	CGI:chr7:72335772-72337783	N_Shelf
cg18805469	0.47813	0.795087	-0.316957	1.09465e-11	8.6946e-15	chr1	152972334	152972335	SPRR4	protein_coding	ENST00000328051.2	1667	CGI:chr1:153260996-153261837	.
cg15099397	0.485754	0.802675	-0.316921	6.06977e-14	8.6605e-17	chr13	110109230	110109231	.	.	.	.	CGI:chr13:110138181-110138659	.
cg12691739	0.408727	0.725638	-0.316911	1.60351e-13	2.05729e-16	chr17	51944048	51944049	CA10;CA10;CA10;CA10;CA10;CA10;CA10	protein_coding;protein_coding;protein_coding;protein_coding;protein_coding;protein_coding;protein_coding	ENST00000285273.7;ENST00000442502.5;ENST00000451037.5;ENST00000570565.4;ENST00000571371.4;ENST00000573294.1;ENST00000575181.1	215754;215970;214680;215955;214016;214016;215936	CGI:chr17:52157815-52158874	.
cg13473184	0.36635	0.683226	-0.316877	4.26014e-15	8.37433e-18	chr1	154932328	154932329	PMVK	protein_coding	ENST00000368467.3	4664	CGI:chr1:154936486-154937455	.
cg22255095	0.35975	0.676619	-0.316869	1.39668e-09	6.79602e-13	chr20	61897275	61897276	CDH4;CDH4;CDH4	protein_coding;protein_coding;protein_coding	ENST00000543233.2;ENST00000611855.3;ENST00000614565.3	297513;327139;644848	CGI:chr20:61895024-61895279	S_Shore
cg01218150	0.570659	0.887527	-0.316869	1.71505e-16	4.98057e-19	chr13	20391832	20391833	.	.	.	.	CGI:chr13:20391819-20392370	Island
cg25524464	0.387719	0.704579	-0.31686	9.71813e-14	1.3181e-16	chr10	131528735	131528736	.	.	.	.	CGI:chr10:131519765-131520061	.
cg24522654	0.295959	0.612798	-0.316838	1.88495e-21	2.48175e-23	chr12	19382220	19382221	.	.	.	.	CGI:chr12:19439249-19440751	.
cg09562655	0.620022	0.936839	-0.316817	4.47841e-07	1.44491e-10	chr3	185986417	185986418	.	.	.	.	CGI:chr3:185937268-185938241	.
cg00300672	0.293622	0.610413	-0.316791	1.51997e-27	2.17139e-28	chr2	124319859	124319860	CNTNAP5	protein_coding	ENST00000431078.1	294571	CGI:chr2:124024675-124025678	.
cg19924352	0.446417	0.763175	-0.316759	1.94216e-13	2.43378e-16	chr8	123183162	123183163	FAM83A;FAM83A;FAM83A;FAM83A;FAM83A;RP11-539E17.5	protein_coding;protein_coding;protein_coding;protein_coding;protein_coding;antisense	ENST00000276699.9;ENST00000518448.4;ENST00000521468.1;ENST00000522648.4;ENST00000536633.2;ENST00000522383.1	480;4114;3;480;4114;-373	CGI:chr8:123160560-123161301	.
cg09355027	0.264805	0.581555	-0.316751	1.77499e-20	1.65666e-22	chr2	2577581	2577582	.	.	.	.	CGI:chr2:2650336-2650586	.
cg13720705	0.407199	0.72386	-0.316661	5.74816e-14	8.25208e-17	chr10	37701442	37701443	.	.	.	.	CGI:chr10:37680208-37681422	.
cg06846214	0.353828	0.670437	-0.316609	2.19532e-15	4.71532e-18	chr1	248386370	248386371	OR2T6	protein_coding	ENST00000355728.2	-1240	CGI:chr1:248691729-248692169	.
cg00633740	0.493867	0.810462	-0.316595	6.03381e-14	8.61973e-17	chr20	59304850	59304851	EDN3;EDN3;EDN3;EDN3;EDN3	protein_coding;protein_coding;protein_coding;protein_coding;protein_coding	ENST00000311585.10;ENST00000337938.5;ENST00000371025.6;ENST00000371028.5;ENST00000395654.3	4406;4422;4231;4405;4146	CGI:chr20:59300262-59301071	S_Shelf
cg26225893	0.539239	0.855801	-0.316562	1.53822e-10	9.27037e-14	chr3	124934874	124934875	MUC13;MUC13;MUC13	protein_coding;protein_coding;protein_coding	ENST00000478191.1;ENST00000497378.1;ENST00000616727.3	-126;18946;-122	CGI:chr3:124886212-124887882	.
cg17400812	0.465982	0.782523	-0.316541	1.27269e-12	1.28722e-15	chr7	41815227	41815228	.	.	.	.	CGI:chr7:41705580-41705864	.
cg11161597	0.371643	0.688161	-0.316518	2.90478e-09	1.31898e-12	chr12	132167928	132167929	.	.	.	.	CGI:chr12:132168478-132168691	N_Shore
cg02778678	0.584751	0.901263	-0.316512	4.53843e-09	1.98133e-12	chr20	63406150	63406151	KCNQ2;KCNQ2;KCNQ2;KCNQ2;KCNQ2;KCNQ2	protein_coding;protein_coding;protein_coding;protein_coding;protein_coding;protein_coding	ENST00000359125.5;ENST00000370224.4;ENST00000625514.1;ENST00000626839.1;ENST00000629241.1;ENST00000629676.1	66441;66449;66406;66528;66406;66406	CGI:chr20:63406105-63406366	Island
cg00086488	0.47257	0.78905	-0.31648	5.24074e-10	2.79293e-13	chr13	112994568	112994569	MCF2L;MCF2L;MCF2L;MCF2L;MCF2L	protein_coding;protein_coding;protein_coding;protein_coding;protein_coding	ENST00000375608.6;ENST00000397030.4;ENST00000421756.4;ENST00000433807.4;ENST00000535094.5	100189;26067;15255;9449;25346	CGI:chr13:112994612-112995287	N_Shore
cg15700197	0.474786	0.791221	-0.316436	1.77241e-12	1.72509e-15	chr1	159439417	159439418	OR10J1;RP11-550P17.5	protein_coding;antisense	ENST00000423932.4;ENST00000431862.1	-306;29652	CGI:chr1:159188438-159188708	.
cg03265268	0.435787	0.75219	-0.316403	4.76228e-13	5.4152e-16	chr8	11982255	11982256	DEFB135	protein_coding	ENST00000382208.2	-67	CGI:chr8:12014609-12015270	.
cg05514299	0.251155	0.567551	-0.316396	2.81445e-20	2.45957e-22	chr17	76872588	76872589	MGAT5B;MGAT5B;MGAT5B;MGAT5B;MGAT5B;MGAT5B	protein_coding;protein_coding;protein_coding;protein_coding;protein_coding;protein_coding	ENST00000301618.7;ENST00000374998.3;ENST00000428789.5;ENST00000565043.4;ENST00000565675.1;ENST00000569840.5	4131;3763;-60;-124;3871;4131	CGI:chr17:76868088-76870575	S_Shelf
cg16002378	0.552395	0.868777	-0.316383	7.86214e-10	4.02983e-13	chr14	104570196	104570197	TMEM179	protein_coding	ENST00000415614.5	34564	CGI:chr14:104574970-104575224	.
cg26155032	0.533646	0.849971	-0.316325	2.48579e-13	3.02093e-16	chr15	96776707	96776708	SPATA8-AS1;SPATA8-AS1	antisense;antisense	ENST00000558722.1;ENST00000560888.4	6606;4948	CGI:chr15:96416111-96417301	.
cg24579970	0.341258	0.657562	-0.316304	1.52099e-18	7.99319e-21	chr1	7063255	7063256	CAMTA1	protein_coding	ENST00000303635.10	277930	CGI:chr1:7062459-7062667	S_Shore
cg23594882	0.603877	0.920152	-0.316276	1.86765e-10	1.10307e-13	chr7	54419653	54419654	SLC25A5P3	processed_pseudogene	ENST00000444439.1	208	CGI:chr7:54542041-54542447	.
cg05919685	0.35202	0.668274	-0.316255	4.50686e-14	6.69241e-17	chr1	159587207	159587208	APCS	protein_coding	ENST00000255040.2	-619	CGI:chr1:159780626-159781563	.
cg16226785	0.545664	0.861886	-0.316222	1.77623e-11	1.34127e-14	chr15	86867647	86867648	AGBL1	protein_coding	ENST00000441037.5	725650	CGI:chr15:85840646-85840884	.
cg25227672	0.384229	0.700421	-0.316192	3.26923e-17	1.17659e-19	chr11	124936016	124936017	HEPACAM;HEPACAM	protein_coding;protein_coding	ENST00000298251.4;ENST00000528971.1	397;397	CGI:chr11:124920918-124921458	.
cg07090653	0.474634	0.790788	-0.316154	9.23668e-12	7.49817e-15	chr1	152812438	152812439	LCE1B;LCE1B	protein_coding;protein_coding	ENST00000360090.3;ENST00000615904.1	466;74919	CGI:chr1:152515581-152515794	.
cg08367318	0.480903	0.797017	-0.316114	3.68886e-12	3.31604e-15	chr6	31776175	31776176	VWA7;VWA7;VWA7	protein_coding;protein_coding;protein_coding	ENST00000375688.4;ENST00000467576.1;ENST00000497645.1	1120;1098;745	CGI:chr6:31795463-31796128	.
cg11141743	0.38499	0.701101	-0.316111	4.40616e-18	2.05484e-20	chr4	17187102	17187103	RP11-576E20.1	lincRNA	ENST00000509964.1	-1042	CGI:chr4:17511686-17512358	.
cg10966440	0.434512	0.750598	-0.316086	7.09882e-14	9.93979e-17	chr11	132875806	132875807	OPCML;OPCML;OPCML;OPCML;OPCML;OPCML;OPCML	protein_coding;protein_coding;protein_coding;protein_coding;protein_coding;protein_coding;protein_coding	ENST00000331898.10;ENST00000374778.4;ENST00000524381.4;ENST00000525412.1;ENST00000529038.4;ENST00000541867.4;ENST00000612177.3	67866;67963;656714;67205;656597;67287;67287	CGI:chr11:132942767-132943180	.
cg23068476	0.550048	0.866119	-0.316071	1.16946e-10	7.25426e-14	chr12	2504537	2504538	CACNA1C;CACNA1C;CACNA1C;CACNA1C;CACNA1C;CACNA1C;CACNA1C;CACNA1C;CACNA1C;CACNA1C;CACNA1C;CACNA1C;CACNA1C;CACNA1C;CACNA1C;CACNA1C;CACNA1C;CACNA1C;CACNA1C;CACNA1C;CACNA1C;CACNA1C;CACNA1C;CACNA1C;CACNA1C;CACNA1C;CACNA1C;CACNA1C;CACNA1C	protein_coding;protein_coding;protein_coding;protein_coding;protein_coding;protein_coding;protein_coding;protein_coding;protein_coding;protein_coding;protein_coding;protein_coding;protein_coding;protein_coding;protein_coding;protein_coding;protein_coding;protein_coding;protein_coding;protein_coding;protein_coding;protein_coding;protein_coding;protein_coding;protein_coding;protein_coding;protein_c…	ENST00000327702.10;ENST00000335762.8;ENST00000344100.6;ENST00000347598.7;ENST00000399591.4;ENST00000399595.4;ENST00000399597.4;ENST00000399601.4;ENST00000399603.4;ENST00000399606.4;ENST00000399617.4;ENST00000399621.4;ENST00000399629.4;ENST00000399634.4;ENST00000399637.4;ENST00000399638.4;ENST00000399641.4;ENST00000399644.4;ENST00000399649.4;ENST00000399655.4;ENST00000402845.6;ENST00000406454.6;EN…	450973;451238;450973;450973;450973;450973;450973;450973;450973;450973;450973;450973;450973;450973;450973;450973;450973;450973;450973;451238;450973;450973;450998;100;55560;55560;55560;55560;55560	CGI:chr12:2679448-2679713	.
cg14221048	0.495779	0.81183	-0.316051	4.63118e-13	5.28155e-16	chr9	87120357	87120358	.	.	.	.	CGI:chr9:87148421-87148852	.
cg06250720	0.369812	0.685838	-0.316026	5.21204e-17	1.77022e-19	chr10	5551986	5551987	.	.	.	.	CGI:chr10:5525159-5525865	.
cg03056513	0.512643	0.828653	-0.316009	3.51116e-12	3.16524e-15	chr10	131519320	131519321	.	.	.	.	CGI:chr10:131519765-131520061	N_Shore
cg09068128	0.588485	0.904419	-0.315934	7.75e-07	2.44105e-10	chr5	179354562	179354563	.	.	.	.	CGI:chr5:179343723-179345793	.
cg19229692	0.505749	0.821643	-0.315894	7.33211e-15	1.35243e-17	chr7	132145520	132145521	PLXNA4;PLXNA4;PLXNA4	protein_coding;protein_coding;protein_coding	ENST00000321063.7;ENST00000359827.6;ENST00000496550.1	431045;431782;-12	CGI:chr7:131945415-131945737	.
cg19673440	0.507895	0.82377	-0.315874	2.70943e-11	1.95808e-14	chr2	2398581	2398582	.	.	.	.	CGI:chr2:2189738-2189944	.
cg18268863	0.489572	0.805434	-0.315862	5.44027e-14	7.86329e-17	chr11	55882570	55882571	TRIM51	protein_coding	ENST00000449290.5	-728	CGI:chr11:55874234-55874644	.
cg07470207	0.234074	0.54987	-0.315796	4.63856e-14	6.86178e-17	chr8	131816499	131816500	.	.	.	.	CGI:chr8:131904003-131904813	.
cg04928338	0.442107	0.757893	-0.315786	2.15785e-15	4.64482e-18	chr16	5236491	5236492	.	.	.	.	CGI:chr16:5239581-5240385	N_Shelf
cg24351427	0.549043	0.864826	-0.315782	1.56021e-11	1.1953e-14	chr1	185700977	185700978	.	.	.	.	CGI:chr1:185316197-185317234	.
cg07841014	0.565782	0.881485	-0.315703	1.21023e-12	1.23188e-15	chr2	79087619	79087620	REG1B;REG1B;REG1B;REG1B;REG1B	protein_coding;protein_coding;protein_coding;protein_coding;protein_coding	ENST00000305089.6;ENST00000454188.4;ENST00000469052.1;ENST00000476554.1;ENST00000479258.4	375;-771;375;399;401	CGI:chr2:78993066-78993466	.
cg16791528	0.550673	0.866352	-0.315678	1.46602e-12	1.46143e-15	chr2	79120406	79120407	REG1A;REG1A;REG1A;REG1A	protein_coding;protein_coding;protein_coding;protein_coding	ENST00000233735.1;ENST00000461579.1;ENST00000485184.1;ENST00000488524.1	-53;-85;-430;43	CGI:chr2:78993066-78993466	.
cg07917546	0.299037	0.614708	-0.315671	4.44825e-16	1.15774e-18	chr16	86462617	86462618	.	.	.	.	CGI:chr16:86494665-86495407	.
cg18845417	0.394347	0.709985	-0.315638	6.39263e-15	1.19622e-17	chr2	95080231	95080232	.	.	.	.	CGI:chr2:95076849-95077173	S_Shelf
cg03011928	0.381368	0.696995	-0.315626	3.10745e-15	6.3808e-18	chr16	82989635	82989636	CDH13;CDH13;CDH13;CDH13;CDH13;CDH13;CDH13;CDH13;CDH13;CDH13;CDH13;CDH13;CDH13;CTD-3253I12.1	protein_coding;protein_coding;protein_coding;protein_coding;protein_coding;protein_coding;protein_coding;protein_coding;protein_coding;protein_coding;protein_coding;protein_coding;protein_coding;antisense	ENST00000268613.13;ENST00000428848.6;ENST00000431540.6;ENST00000539548.5;ENST00000562601.4;ENST00000565636.4;ENST00000566333.1;ENST00000566620.4;ENST00000567109.4;ENST00000568770.4;ENST00000569144.4;ENST00000569454.1;ENST00000622885.3;ENST00000565238.1	362669;362664;362664;362664;362666;362664;362663;131281;362831;362665;362668;63676;131278;664	CGI:chr16:82627046-82628208	.
cg19373760	0.281511	0.597129	-0.315618	1.61034e-12	1.58364e-15	chr1	247516686	247516687	GCSAML;GCSAML;GCSAML;GCSAML;GCSAML;GCSAML	protein_coding;protein_coding;protein_coding;protein_coding;protein_coding;protein_coding	ENST00000366489.4;ENST00000366491.5;ENST00000526896.4;ENST00000527084.4;ENST00000527541.4;ENST00000536561.4	9565;9570;9561;9627;9612;9627	CGI:chr1:247518097-247518649	N_Shore
cg00485748	0.455677	0.771295	-0.315618	8.04922e-20	6.18491e-22	chr20	46033368	46033369	SLC12A5;SLC12A5;SLC12A5;SLC12A5;SLC12A5;SLC12A5;SLC12A5;SLC12A5;SLC12A5;SLC12A5;SLC12A5;SLC12A5;SLC12A5	protein_coding;protein_coding;protein_coding;protein_coding;protein_coding;protein_coding;protein_coding;protein_coding;protein_coding;protein_coding;protein_coding;protein_coding;protein_coding	ENST00000243964.5;ENST00000372315.4;ENST00000454036.5;ENST00000539566.3;ENST00000608944.4;ENST00000616201.3;ENST00000616202.3;ENST00000616933.3;ENST00000622711.3;ENST00000625683.1;ENST00000626937.1;ENST00000627290.1;ENST00000629054.1	4185;4171;11677;4143;4358;4185;4185;4185;4185;4185;4185;4183;4185	CGI:chr20:46030301-46030604	S_Shelf
cg13927088	0.501635	0.817238	-0.315602	3.23475e-10	1.80741e-13	chr1	152718649	152718650	C1orf68	protein_coding	ENST00000368775.3	-874	CGI:chr1:152515581-152515794	.
cg04809380	0.48394	0.799531	-0.315591	5.0214e-13	5.66475e-16	chr16	1194525	1194526	CACNA1H;CACNA1H;CACNA1H;CACNA1H	protein_coding;protein_coding;protein_coding;protein_coding	ENST00000348261.8;ENST00000358590.7;ENST00000564954.1;ENST00000565831.4	41283;41283;-505;40786	CGI:chr16:1194669-1195128	N_Shore
cg00240178	0.426676	0.742257	-0.315581	5.59878e-15	1.06527e-17	chr6	73522385	73522386	EEF1A1;EEF1A1;EEF1A1;EEF1A1;EEF1A1;EEF1A1;EEF1A1;RP11-505P4.7;RP11-505P4.7	protein_coding;protein_coding;protein_coding;protein_coding;protein_coding;protein_coding;protein_coding;antisense;antisense	ENST00000309268.9;ENST00000316292.12;ENST00000331523.5;ENST00000356303.5;ENST00000455918.1;ENST00000610520.3;ENST00000615060.3;ENST00000429386.1;ENST00000431108.4	-796;-1366;-663;-484;1413;-1352;-1352;-1457;-1234	CGI:chr6:73520239-73521774	S_Shore
cg18232313	0.536178	0.851758	-0.31558	2.29088e-11	1.68217e-14	chr6	18123001	18123002	NHLRC1	protein_coding	ENST00000340650.4	-394	CGI:chr6:18122019-18122763	S_Shore
cg26279783	0.493667	0.809241	-0.315574	6.84526e-12	5.75716e-15	chr6	33175579	33175580	COL11A2;COL11A2;COL11A2;COL11A2	protein_coding;protein_coding;protein_coding;protein_coding	ENST00000341947.5;ENST00000361917.4;ENST00000374708.7;ENST00000477772.1	16890;16890;16921;2315	CGI:chr6:33161514-33161941	.
cg25391023	0.349494	0.665058	-0.315564	2.53121e-16	7.05353e-19	chr6	32406977	32406978	BTNL2;BTNL2;BTNL2;BTNL2;BTNL2	protein_coding;protein_coding;protein_coding;protein_coding;protein_coding	ENST00000374993.3;ENST00000446536.2;ENST00000454136.6;ENST00000465865.4;ENST00000544175.2	147;152;152;147;147	CGI:chr6:32521965-32522351	.
cg26457700	0.390296	0.705858	-0.315561	4.06973e-14	6.11989e-17	chr17	82331665	82331666	SECTM1;SECTM1;SECTM1;SECTM1;SECTM1;SECTM1;SECTM1	protein_coding;protein_coding;protein_coding;protein_coding;protein_coding;protein_coding;protein_coding	ENST00000269389.6;ENST00000580437.4;ENST00000581691.4;ENST00000581864.4;ENST00000582290.4;ENST00000582563.4;ENST00000583093.4	2334;2098;2410;2084;2102;2105;2099	CGI:chr17:82333144-82334518	N_Shore
cg01063579	0.496763	0.812323	-0.31556	5.77033e-09	2.47033e-12	chr16	86681546	86681547	.	.	.	.	CGI:chr16:86681392-86681719	Island
cg14216734	0.515658	0.83121	-0.315552	2.09807e-12	2.0069e-15	chr1	158848018	158848019	MNDA;MNDA	protein_coding;protein_coding	ENST00000368141.4;ENST00000438394.1	16700;2116	CGI:chr1:159171412-159171928	.
cg25939242	0.514088	0.829614	-0.315526	1.134e-12	1.16104e-15	chr4	9369666	9369667	.	.	.	.	CGI:chr4:9381002-9381409	.
cg01406072	0.483296	0.7988	-0.315504	2.81373e-11	2.02593e-14	chr13	111548689	111548690	.	.	.	.	CGI:chr13:111547865-111548546	S_Shore
cg17025555	0.478656	0.794089	-0.315433	4.21125e-12	3.73669e-15	chr1	158754572	158754573	OR6K6	protein_coding	ENST00000368144.2	-149	CGI:chr1:159171412-159171928	.
cg24629380	0.53495	0.850304	-0.315354	1.1308e-11	8.93711e-15	chr1	115671438	115671439	VANGL1;VANGL1;VANGL1;VANGL1;VANGL1;VANGL1	protein_coding;protein_coding;protein_coding;protein_coding;protein_coding;protein_coding	ENST00000310260.6;ENST00000355485.5;ENST00000369509.1;ENST00000369510.7;ENST00000474344.1;ENST00000478369.4	28808;29484;20035;29446;293;392	CGI:chr1:115642094-115642940	.
cg14224444	0.438186	0.753535	-0.315349	1.22068e-18	6.60848e-21	chr6	118266027	118266028	SLC35F1;SLC35F1	protein_coding;protein_coding	ENST00000360388.7;ENST00000621341.1	358500;111584	CGI:chr6:117920184-117920406	.
cg22947965	0.508024	0.823372	-0.315348	8.20126e-13	8.74601e-16	chr11	123904481	123904482	.	.	.	.	CGI:chr11:123741190-123741837	.
cg02906074	0.538863	0.854207	-0.315344	1.86853e-12	1.80994e-15	chr14	72636165	72636166	DPF3	protein_coding	ENST00000556509.4	257924	CGI:chr14:72892081-72894226	.
cg09696747	0.450132	0.765474	-0.315342	1.12283e-11	8.88804e-15	chr13	111401367	111401368	.	.	.	.	CGI:chr13:111402078-111402297	N_Shore
cg02637474	0.596872	0.912163	-0.315291	3.6803e-09	1.63777e-12	chr7	157547860	157547861	PTPRN2;PTPRN2;PTPRN2;PTPRN2	protein_coding;protein_coding;protein_coding;protein_coding	ENST00000389413.6;ENST00000389416.7;ENST00000389418.7;ENST00000409483.4	1039914;1039852;1039820;1039929	CGI:chr7:157553919-157554375	.
cg11835897	0.480394	0.795682	-0.315288	4.90182e-12	4.27626e-15	chr5	2155820	2155821	.	.	.	.	CGI:chr5:2136683-2137191	.
cg18116418	0.349308	0.664532	-0.315224	6.82335e-16	1.69729e-18	chr1	152580768	152580769	LCE3C;LCE3D	protein_coding;protein_coding	ENST00000617545.1;ENST00000368787.3	69232;-263	CGI:chr1:152515581-152515794	.
cg05481163	0.520919	0.836087	-0.315167	3.78989e-12	3.39422e-15	chr10	2714536	2714537	.	.	.	.	CGI:chr10:2772811-2773277	.
cg21772735	0.521062	0.836229	-0.315166	3.48124e-11	2.44788e-14	chr8	899830	899831	ERICH1-AS1;ERICH1-AS1;ERICH1-AS1;ERICH1-AS1	antisense;antisense;antisense;antisense	ENST00000522092.4;ENST00000524139.4;ENST00000577187.4;ENST00000578889.1	162178;16631;162087;16501	CGI:chr8:900103-900405	N_Shore
cg00187981	0.571264	0.886416	-0.315151	3.98575e-11	2.76486e-14	chr8	141903252	141903253	.	.	.	.	CGI:chr8:141903062-141903292	Island
cg08141956	0.402192	0.717309	-0.315117	2.19379e-11	1.61835e-14	chr1	17420344	17420345	RCC2;RCC2	protein_coding;protein_coding	ENST00000375433.3;ENST00000375436.7	18218;19381	CGI:chr1:17419704-17420051	S_Shore
cg06708731	0.407648	0.722747	-0.315099	1.28654e-15	2.95659e-18	chr9	133636298	133636299	DBH;DBH	protein_coding;protein_coding	ENST00000263611.2;ENST00000393056.5	-81;-63	CGI:chr9:133609048-133609626	.
cg14054990	0.398801	0.713892	-0.315091	6.99162e-17	2.2774e-19	chr21	30502184	30502185	KRTAP19-5	protein_coding	ENST00000334151.2	-66	CGI:chr21:29939068-29939788	.
cg03815116	0.472561	0.787638	-0.315077	1.43935e-14	2.43781e-17	chr4	44652189	44652190	YIPF7;YIPF7;YIPF7;YIPF7;YIPF7	protein_coding;protein_coding;protein_coding;protein_coding;protein_coding	ENST00000332990.5;ENST00000415895.7;ENST00000502794.1;ENST00000508947.1;ENST00000510035.4	-547;-560;-547;26368;-547	CGI:chr4:44678326-44678724	.
cg06221609	0.505448	0.82049	-0.315042	5.48106e-11	3.68386e-14	chr1	152826662	152826663	LCE1A	protein_coding	ENST00000335123.3	-812	CGI:chr1:152515581-152515794	.
cg09105442	0.494761	0.809794	-0.315033	1.90221e-20	1.76131e-22	chr10	1182499	1182500	ADARB2;ADARB2	protein_coding;protein_coding	ENST00000381310.6;ENST00000381312.4	17862;554978	CGI:chr10:1184873-1185274	N_Shelf
cg19717640	0.396237	0.711249	-0.315013	9.1991e-14	1.2545e-16	chr10	84226023	84226024	LRIT2;LRIT2	protein_coding;protein_coding	ENST00000372113.6;ENST00000538192.3	-496;-433	CGI:chr10:84237353-84237671	.
cg20663432	0.390809	0.705821	-0.315011	2.74037e-13	3.29541e-16	chr12	5587643	5587644	ANO2;ANO2;ANO2	protein_coding;protein_coding;protein_coding	ENST00000327087.11;ENST00000356134.8;ENST00000546188.4	358590;358590;357617	CGI:chr12:5494421-5494824	.
cg01975957	0.500846	0.815844	-0.314998	9.17982e-12	7.458e-15	chr1	152826436	152826437	LCE1A	protein_coding	ENST00000335123.3	-1038	CGI:chr1:152515581-152515794	.
cg18183671	0.504474	0.819448	-0.314974	1.04063e-13	1.40139e-16	chr3	35679502	35679503	ARPP21;ARPP21;ARPP21;ARPP21;ARPP21;ARPP21;ARPP21;ARPP21;ARPP21;ARPP21;ARPP21;ARPP21;ARPP21;ARPP21;ARPP21;ARPP21;ARPP21;ARPP21;ARPP21;ARPP21;ARPP21	protein_coding;protein_coding;protein_coding;protein_coding;protein_coding;protein_coding;protein_coding;protein_coding;protein_coding;protein_coding;protein_coding;protein_coding;protein_coding;protein_coding;protein_coding;protein_coding;protein_coding;protein_coding;protein_coding;protein_coding;protein_coding	ENST00000187397.7;ENST00000396481.5;ENST00000396482.5;ENST00000412048.4;ENST00000413378.4;ENST00000414496.4;ENST00000417925.4;ENST00000419330.4;ENST00000421492.4;ENST00000427542.4;ENST00000428373.4;ENST00000432450.4;ENST00000432682.4;ENST00000434383.5;ENST00000438577.4;ENST00000441454.4;ENST00000444190.4;ENST00000449196.4;ENST00000450234.4;ENST00000452563.4;ENST00000474696.4	37336;-1436;-123;-120;-244;37161;-284;35880;39246;682;39912;-143;-126;-1460;37164;-1499;38537;38080;40556;37211;-119	CGI:chr3:35639017-35640072	.
cg05455971	0.428626	0.743596	-0.314969	3.56115e-18	1.69694e-20	chr8	1668256	1668257	DLGAP2;DLGAP2;DLGAP2	protein_coding;protein_coding;protein_coding	ENST00000421627.5;ENST00000520901.4;ENST00000612087.1	166889;119611;166889	CGI:chr8:1668355-1668710	N_Shore
cg16901302	0.491084	0.806044	-0.31496	2.98656e-12	2.74861e-15	chr2	2689117	2689118	.	.	.	.	CGI:chr2:2650336-2650586	.
cg23029409	0.471124	0.786074	-0.31495	2.25091e-13	2.77254e-16	chr15	25203182	25203183	SNHG14;SNHG14;SNORD115-18;SNORD115-19	processed_transcript;processed_transcript;snoRNA;snoRNA	ENST00000424208.4;ENST00000424333.4;ENST00000363293.1;ENST00000363098.1	21338;5753;-46;-1176	CGI:chr15:25438248-25439268	.
cg25581222	0.396655	0.711576	-0.314921	1.42926e-10	8.68173e-14	chr15	64247040	64247041	CSNK1G1;CSNK1G1;CSNK1G1;CTD-2116N17.1;CTD-2116N17.1	protein_coding;protein_coding;protein_coding;protein_coding;protein_coding	ENST00000303052.10;ENST00000606225.1;ENST00000607537.4;ENST00000561349.4;ENST00000606793.1	109148;53588;109134;126730;126673	CGI:chr15:64162691-64163378	.
cg11480962	0.539997	0.854908	-0.314912	5.24816e-14	7.62339e-17	chr15	87123900	87123901	.	.	.	.	CGI:chr15:88255423-88255783	.
cg07700925	0.398651	0.713513	-0.314862	3.50531e-15	7.09782e-18	chr10	127742003	127742004	.	.	.	.	CGI:chr10:127736146-127739102	S_Shelf
cg05193110	0.641634	0.956475	-0.314841	1.52794e-08	6.06807e-12	chr14	72671185	72671186	DPF3;DPF3;DPF3;DPF3;DPF3;DPF3;DPF3;DPF3;DPF3	protein_coding;protein_coding;protein_coding;protein_coding;protein_coding;protein_coding;protein_coding;protein_coding;protein_coding	ENST00000366353.7;ENST00000381216.7;ENST00000541685.4;ENST00000546183.1;ENST00000556509.4;ENST00000556891.4;ENST00000557704.4;ENST00000610283.3;ENST00000614862.3	221465;222917;222932;222917;222904;8118;52921;221465;222932	CGI:chr14:72892081-72894226	.
cg15645728	0.365626	0.680444	-0.314818	1.4784e-19	1.05935e-21	chr1	4602088	4602089	.	.	.	.	CGI:chr1:4653929-4656495	.
cg06755296	0.334367	0.649179	-0.314812	2.83196e-15	5.87195e-18	chr15	97656695	97656696	LINC00923	lincRNA	ENST00000615399.1	47328	CGI:chr15:97652791-97653161	S_Shelf
cg24736935	0.466475	0.78128	-0.314804	3.42637e-13	4.02899e-16	chr5	2565435	2565436	.	.	.	.	CGI:chr5:2564383-2564638	S_Shore
cg07172334	0.396014	0.710807	-0.314794	4.53914e-15	8.84576e-18	chr21	30282943	30282944	KRTAP24-1	protein_coding	ENST00000340345.5	16	CGI:chr21:29939068-29939788	.
cg05694089	0.354078	0.668858	-0.31478	7.42374e-14	1.03375e-16	chr1	15832989	15832990	.	.	.	.	CGI:chr1:15834765-15836385	N_Shore
cg05576992	0.454531	0.769304	-0.314773	1.51362e-14	2.54268e-17	chr8	1019029	1019030	ERICH1-AS1;ERICH1-AS1;ERICH1-AS1	antisense;antisense;antisense	ENST00000522092.4;ENST00000524139.4;ENST00000578889.1	281377;135830;135700	CGI:chr8:1016997-1017198	S_Shore
cg16413327	0.492117	0.806882	-0.314764	5.46407e-18	2.47723e-20	chr16	31204130	31204131	PYCARD;PYCARD;PYCARD	protein_coding;protein_coding;protein_coding	ENST00000247470.9;ENST00000350605.4;ENST00000561508.1	-1137;-1373;-679	CGI:chr16:31202245-31202966	S_Shore
cg13373080	0.422633	0.737388	-0.314756	8.96866e-16	2.15223e-18	chr5	15918831	15918832	FBXL7;FBXL7	protein_coding;protein_coding	ENST00000504595.1;ENST00000510662.1	418634;417392	CGI:chr5:15927979-15928409	.
cg15867307	0.445203	0.759949	-0.314745	1.58786e-12	1.56616e-15	chr2	237202186	237202187	.	.	.	.	CGI:chr2:237085714-237086233	.
cg05603784	0.48209	0.796809	-0.314719	2.40135e-12	2.26025e-15	chr16	88432675	88432676	ZNF469;ZNF469	protein_coding;protein_coding	ENST00000437464.1;ENST00000565624.1	5203;5203	CGI:chr16:88431692-88432417	S_Shore
cg08323777	0.565722	0.880438	-0.314716	3.7111e-08	1.38264e-11	chr5	1974745	1974746	.	.	.	.	CGI:chr5:1950510-1951557	.
cg16508627	0.521188	0.835895	-0.314707	1.55235e-13	2.00082e-16	chr16	22915280	22915281	HS3ST2;HS3ST2	protein_coding;protein_coding	ENST00000261374.3;ENST00000473392.1	101102;100782	CGI:chr16:22915022-22915318	Island
cg25212701	0.359759	0.674413	-0.314655	3.47241e-16	9.30228e-19	chr1	162381874	162381875	C1orf226;C1orf226;C1orf226;RP11-565P22.6;RP11-565P22.6	protein_coding;protein_coding;protein_coding;protein_coding;protein_coding	ENST00000420220.1;ENST00000426197.2;ENST00000458626.3;ENST00000367932.3;ENST00000431696.1	14965;3032;143;14561;16466	CGI:chr1:162367086-162367531	.
cg27158462	0.468951	0.78357	-0.314619	7.87433e-19	4.50329e-21	chr15	26628671	26628672	GABRB3;GABRB3;GABRB3;GABRB3;GABRB3;GABRB3;GABRB3;GABRB3;GABRB3;GABRB3;GABRB3	protein_coding;protein_coding;protein_coding;protein_coding;protein_coding;protein_coding;protein_coding;protein_coding;protein_coding;protein_coding;protein_coding	ENST00000299267.7;ENST00000311550.8;ENST00000400188.6;ENST00000541819.5;ENST00000545868.4;ENST00000554556.4;ENST00000555094.4;ENST00000555632.4;ENST00000556166.2;ENST00000622697.3;ENST00000628124.1	145118;144404;420;310869;138566;144387;88095;144344;508;144406;88095	CGI:chr15:26628950-26629381	N_Shore
cg06164973	0.602955	0.917529	-0.314574	2.80123e-08	1.06378e-11	chr16	87067928	87067929	RP11-134D3.2	lincRNA	ENST00000566798.2	1222	CGI:chr16:86931665-86931890	.
cg26401796	0.470662	0.785221	-0.314559	1.23403e-13	1.63293e-16	chr12	5465254	5465255	NTF3;NTF3;NTF3	protein_coding;protein_coding;protein_coding	ENST00000423158.3;ENST00000535299.4;ENST00000543548.1	33140;33141;32128	CGI:chr12:5494421-5494824	.
cg19207486	0.483782	0.79832	-0.314537	1.03902e-16	3.21252e-19	chr19	22140305	22140306	RP11-157B13.3	processed_pseudogene	ENST00000598980.1	-228	CGI:chr19:22261639-22261913	.
cg01670876	0.45829	0.772818	-0.314528	7.66998e-13	8.25109e-16	chr14	74424658	74424659	SYNDIG1L;SYNDIG1L	protein_coding;protein_coding	ENST00000331628.6;ENST00000554953.1	1445;1445	CGI:chr14:74425763-74426332	N_Shore
cg00534479	0.437707	0.752217	-0.31451	1.38211e-19	9.97399e-22	chr5	168769459	168769460	MIR218-2;SLIT3;SLIT3;SLIT3;SLIT3	miRNA;protein_coding;protein_coding;protein_coding;protein_coding	ENST00000385006.1;ENST00000332966.8;ENST00000404867.6;ENST00000519486.4;ENST00000519560.4	-1203;531324;113880;22883;531671	CGI:chr5:168579093-168579913	.
cg00320597	0.485377	0.799885	-0.314508	6.68381e-15	1.24499e-17	chr8	1391295	1391296	.	.	.	.	CGI:chr8:1393054-1394000	N_Shore
cg22506490	0.476495	0.790997	-0.314503	8.82436e-12	7.2044e-15	chr1	177033092	177033093	ASTN1;ASTN1;ASTN1;ASTN1;ASTN1	protein_coding;protein_coding;protein_coding;protein_coding;protein_coding	ENST00000281881.6;ENST00000361833.5;ENST00000367657.6;ENST00000424564.2;ENST00000473640.1	131882;131599;131776;131592;-541	CGI:chr1:177164256-177164710	.
cg08862394	0.418269	0.732765	-0.314496	3.83886e-17	1.35512e-19	chr10	131098699	131098700	TCERG1L;TCERG1L	protein_coding;protein_coding	ENST00000368642.4;ENST00000483040.1	213023;161638	CGI:chr10:131095165-131095425	S_Shelf
cg08279194	0.501382	0.815874	-0.314492	1.05073e-12	1.08521e-15	chr1	18209963	18209964	IGSF21	protein_coding	ENST00000251296.3	102216	CGI:chr1:18110057-18111179	.
cg01372107	0.528102	0.842558	-0.314456	1.08887e-11	8.65556e-15	chr7	157560284	157560285	PTPRN2;PTPRN2;PTPRN2;PTPRN2	protein_coding;protein_coding;protein_coding;protein_coding	ENST00000389413.6;ENST00000389416.7;ENST00000389418.7;ENST00000409483.4	1027490;1027428;1027396;1027505	CGI:chr7:157560301-157560538	N_Shore
cg26854588	0.390283	0.70471	-0.314427	4.68054e-17	1.60922e-19	chr17	40283763	40283764	WIPF2	protein_coding	ENST00000323571.7	64440	CGI:chr17:40287563-40287900	N_Shelf
cg17827477	0.405575	0.719991	-0.314416	3.73876e-18	1.77674e-20	chr22	49091531	49091532	.	.	.	.	CGI:chr22:49091515-49091723	Island
cg08157459	0.424701	0.739093	-0.314391	9.76923e-15	1.73609e-17	chr13	111524083	111524084	.	.	.	.	CGI:chr13:111519885-111520094	S_Shelf
cg25819275	0.444615	0.758982	-0.314368	1.3413e-13	1.7553e-16	chr1	248521465	248521466	OR2G6	protein_coding	ENST00000343414.5	-183	CGI:chr1:248691729-248692169	.
cg15514918	0.433184	0.74753	-0.314347	2.22638e-13	2.74523e-16	chr1	235923901	235923902	.	.	.	.	CGI:chr1:235866287-235867297	.
cg23154781	0.464802	0.779128	-0.314327	3.968e-14	5.99137e-17	chr15	80341853	80341854	LINC00927;LINC00927;LINC00927;LINC00927	lincRNA;lincRNA;lincRNA;lincRNA	ENST00000558244.1;ENST00000558578.1;ENST00000558913.4;ENST00000561432.1	-47;-79;-84;-85	CGI:chr15:80403734-80405051	.
cg20067612	0.488755	0.803048	-0.314293	6.85997e-12	5.76745e-15	chr14	101023078	101023079	MIR299;MIR411	miRNA;miRNA	ENST00000385016.3;ENST00000362239.3	-703;-242	CGI:chr14:101065306-101066047	.
cg25370753	0.619133	0.933413	-0.31428	5.27276e-09	2.27498e-12	chr1	181798600	181798601	CACNA1E;CACNA1E;CACNA1E;CACNA1E;CACNA1E;CACNA1E;CACNA1E;CACNA1E	protein_coding;protein_coding;protein_coding;protein_coding;protein_coding;protein_coding;protein_coding;protein_coding	ENST00000357570.8;ENST00000358338.7;ENST00000360108.6;ENST00000367567.7;ENST00000367570.4;ENST00000367573.5;ENST00000621551.2;ENST00000621791.3	314854;314854;314861;314854;315019;314854;314854;315019	CGI:chr1:181798357-181798757	Island
cg14596108	0.483511	0.797784	-0.314273	8.34588e-12	6.85855e-15	chr22	48750772	48750773	FAM19A5;FAM19A5;FAM19A5	protein_coding;protein_coding;protein_coding	ENST00000336769.8;ENST00000358295.8;ENST00000402357.4	261179;174465;261311	CGI:chr22:48749924-48751396	Island
cg08864283	0.636375	0.950636	-0.314261	2.91637e-09	1.3239e-12	chr16	563142	563143	PRR35	protein_coding	ENST00000409413.3	2719	CGI:chr16:564792-565095	N_Shore
cg02096296	0.621153	0.935394	-0.314241	4.96747e-10	2.66169e-13	chr2	1022360	1022361	SNTG2;SNTG2;SNTG2;SNTG2	protein_coding;protein_coding;protein_coding;protein_coding	ENST00000308624.8;ENST00000407292.1;ENST00000450962.4;ENST00000452177.4	71491;71420;71491;71491	CGI:chr2:1056280-1057044	.
cg02217063	0.518735	0.832903	-0.314168	3.45804e-11	2.43377e-14	chr16	6298708	6298709	RBFOX1;RBFOX1;RBFOX1;RBFOX1;RBFOX1;RBFOX1;RP11-420N3.3	protein_coding;protein_coding;protein_coding;protein_coding;protein_coding;protein_coding;processed_transcript	ENST00000422070.7;ENST00000547372.4;ENST00000547605.4;ENST00000548749.4;ENST00000550418.4;ENST00000553186.4;ENST00000569895.3	279004;279114;279613;279004;279576;279576;1058905	CGI:chr16:6483018-6483982	.
cg01125010	0.404821	0.718984	-0.314163	1.16399e-14	2.02182e-17	chr17	78138018	78138019	TMC8;TMC8;TMC8;TMC8;TMC8;TMC8	protein_coding;protein_coding;protein_coding;protein_coding;protein_coding;protein_coding	ENST00000318430.8;ENST00000589691.1;ENST00000590184.1;ENST00000591003.1;ENST00000591144.1;ENST00000591983.4	7231;7229;3068;363;-346;3149	CGI:chr17:78140432-78141103	N_Shelf
cg26345613	0.548343	0.862495	-0.314152	8.19983e-08	2.90054e-11	chr10	1671190	1671191	ADARB2	protein_coding	ENST00000381312.4	66287	CGI:chr10:1699230-1701931	.
cg04177287	0.303122	0.617256	-0.314134	6.29661e-18	2.78611e-20	chr4	21855690	21855691	KCNIP4;KCNIP4;KCNIP4;KCNIP4	protein_coding;protein_coding;protein_coding;protein_coding	ENST00000382152.5;ENST00000447367.5;ENST00000512102.1;ENST00000515786.2	93110;93056;26;92942	CGI:chr4:21948462-21949242	.
cg02672332	0.546938	0.861065	-0.314126	2.29963e-10	1.32971e-13	chr10	132910466	132910467	CFAP46;CFAP46;CFAP46	protein_coding;protein_coding;protein_coding	ENST00000368586.8;ENST00000466834.1;ENST00000486104.4	32120;-369;6217	CGI:chr10:132908542-132908788	S_Shore
cg03475044	0.341541	0.655659	-0.314118	3.05329e-23	7.26974e-25	chr10	2099571	2099572	.	.	.	.	CGI:chr10:2315054-2315277	.
[truncated: 22,810 more rows]
