# Supplementary material for: Integrated data analysis reveals significant associations of KEAP1 mutations with DNA methylation alterations in lung adenocarcinomas
Source: Aging (Albany NY). 2020 Apr 23;12(8):7183–206. doi: 10.18632/aging.103068 (PMC7202502; doi:10.18632/aging.103068)
Supplement: Supplementary File 5 [file aging-12-103068-s004..xlsx]

## Sheet: ARE-search-results (11 gene)
NC_000011.9:c620999-616000 Homo sapiens chromosome 11, GRCh37.p13 Primary Assembly	IRF7 NM_001572
Name	Sequence	Position(0-based)	Strand	Score	p-value	E-value
NFE2L2(MA0150.1)	GGGACACAGCA	2050	+	8.98	0.000475	2.37
NC_000012.11:c6489905-6484906 Homo sapiens chromosome 12, GRCh37.p13 Primary Assembly	SCNN1A NM_001038
Name	Sequence	Position(0-based)	Strand	Score	p-value	E-value
NFE2L2(MA0150.1)	GTGACTTTGCC	525	+	12.02	5e-05	0.249
NFE2L2(MA0150.1)	GTGACTTGGCC	2081	-	11.64	7.5e-05	0.37
NFE2L2(MA0150.1)	ATGACTCAGGA	579	+	10.72	0.00015	0.75
NFE2L2(MA0150.1)	ATGATACAGCC	688	+	10.57	0.00015	0.75
NFE2L2(MA0150.1)	GTGACCCTGCC	2855	-	10.31	0.00015	0.75
NFE2L2(MA0150.1)	GTGACAATGCC	491	+	9.93	0.00015	0.75
NFE2L2(MA0150.1)	CTGACCTTGCA	2141	-	8.85	0.000475	2.37
NFE2L2(MA0150.1)	GTGACTTGGC	2082	-	8.4	0.00065	3.2
NFE2L2(MA0150.1)	ATAACCCAGCA	3171	+	8.21	0.00065	3.2
NFE2L2(MA0150.1)	AAGATTCAGCA	3647	+	7.75	0.000825	4.1
NFE2L2(MA0150.1)	GTGCCACTGCA	840	-	7.69	0.00085	4.2
NFE2L2(MA0150.1)	GAGACAAAGCA	818	-	7.57	0.0009	4.5
NC_000016.9:2092990-2097989 Homo sapiens chromosome 16, GRCh37.p13 Primary Assembly	TSC2 NM_000548
Name	Sequence	Position(0-based)	Strand	Score	p-value	E-value
NFE2L2(MA0150.1)	GTGACAGAGCA	3960	+	12.63	5e-05	0.249
NFE2L2(MA0150.1)	GTGATACTGCA	2470	-	11.01	0.00015	0.75
NFE2L2(MA0150.1)	GTGAGCTAGCA	3448	-	9.89	0.00015	0.75
NFE2L2(MA0150.1)	GGGACTGAGCA	3167	-	7.5	0.0009	4.5
NFE2L2(MA0150.1)	TGACAGAGCA	3961	+	7.42	0.00095	4.7
NC_000006.11:33584156-33589155 Homo sapiens chromosome 6, GRCh37.p13 Primary Assembly	ITPR3 NM_002224
Name	Sequence	Position(0-based)	Strand	Score	p-value	E-value
NFE2L2(MA0150.1)	ATGATTATGCC	1081	-	8.7	0.0006	2.99
NFE2L2(MA0150.1)	ATAACTCAGCC	2895	-	8.57	0.00065	3.2
NFE2L2(MA0150.1)	GTGCCACTGCA	523	+	7.69	0.00085	4.2
NFE2L2(MA0150.1)	GTGCCACAGCC	2957	-	7.47	0.0009	4.5
NFE2L2(MA0150.1)	ATGCCACTGCA	1405	-	7.46	0.000925	4.6
NFE2L2(MA0150.1)	TTGACAGAGCA	4179	-	7.42	0.00095	4.7
NC_000016.9:48273211-48278210 Homo sapiens chromosome 16, GRCh37.p13 Primary Assembly	LONP2 NM_031490
Name	Sequence	Position(0-based)	Strand	Score	p-value	E-value
NFE2L2(MA0150.1)	GTGACAGAGCG	4079	+	10.25	0.00015	0.75
NFE2L2(MA0150.1)	TGACCCAGCA	851	+	9.5	0.0003	1.5
NFE2L2(MA0150.1)	TTGACCCAGCA	850	+	9.5	0.0003	1.5
NFE2L2(MA0150.1)	GTGCCACTGCA	217	+	7.69	0.00085	4.2
NFE2L2(MA0150.1)	ATGATATTGCC	2657	-	7.53	0.0009	4.5
NC_000008.10:c37712431-37707432 Homo sapiens chromosome 8, GRCh37.p13 Primary Assembly	BRF2 NM_018310
Name	Sequence	Position(0-based)	Strand	Score	p-value	E-value
NFE2L2(MA0150.1)	GTGACTCAGCC	186	-	15.06	0	0
NFE2L2(MA0150.1)	GTGACTCAGC	187	-	11.82	7.5e-05	0.37
NFE2L2(MA0150.1)	ATGATCCTGCA	3425	-	9.75	0.000175	0.87
NFE2L2(MA0150.1)	ATCACACAGCA	3594	-	9.24	0.000325	1.62
NFE2L2(MA0150.1)	ATGCCTCAGCC	749	-	8.88	0.000475	2.37
NFE2L2(MA0150.1)	GTGATCATGCA	3600	+	8.57	0.00065	3.2
NFE2L2(MA0150.1)	ATGAGATAGCC	1822	-	8.39	0.00065	3.2
NFE2L2(MA0150.1)	GAGACCCAGCA	305	+	7.95	0.000725	3.6
NFE2L2(MA0150.1)	ATGAGAAAGCC	2512	+	7.93	0.00075	3.7
NFE2L2(MA0150.1)	GTGCCACTGCA	3043	+	7.69	0.00085	4.2
NFE2L2(MA0150.1)	CTGAGAAAGCA	4012	+	7.64	0.0009	4.5
NC_000002.11:c2340045-2335046 Homo sapiens chromosome 2, GRCh37.p13 Primary Assembly	MYT1L NM_015025
Name	Sequence	Position(0-based)	Strand	Score	p-value	E-value
NFE2L2(MA0150.1)	ATGAATCAGCA	4188	-	10.95	0.00015	0.75
NFE2L2(MA0150.1)	CTGATTTTGCA	1063	+	8.87	0.000475	2.37
NFE2L2(MA0150.1)	GTGTTTCAGCA	3645	+	8.78	0.00055	2.74
NFE2L2(MA0150.1)	CTGATTTAGCT	4598	+	8.08	0.000675	3.4
NFE2L2(MA0150.1)	AGGACAAAGCA	2717	-	7.34	0.000975	4.9
NC_000010.10:71073603-71078602 Homo sapiens chromosome 10, GRCh37.p13 Primary Assembly	HK1 NM_000188
Name	Sequence	Position(0-based)	Strand	Score	p-value	E-value
NFE2L2(MA0150.1)	CTGACCAAGCA	2223	-	10.47	0.00015	0.75
NFE2L2(MA0150.1)	GTGGCTCTGCA	271	-	9.32	0.000325	1.62
NFE2L2(MA0150.1)	GGGACACAGCA	1808	+	8.98	0.000475	2.37
NFE2L2(MA0150.1)	ATGACTCAGTG	1912	+	8.34	0.00065	3.2
NFE2L2(MA0150.1)	ATGATTATGCT	2472	+	8.12	0.000675	3.4
NFE2L2(MA0150.1)	GTGCCACTGCA	873	-	7.69	0.00085	4.2
NFE2L2(MA0150.1)	AAGACAAAGCA	2739	+	7.34	0.000975	4.9
NC_000001.10:c6458826-6453827 Homo sapiens chromosome 1, GRCh37.p13 Primary Assembly	ACOT7 NM_007274
Name	Sequence	Position(0-based)	Strand	Score	p-value	E-value
NFE2L2(MA0150.1)	GTGACAGAGCC	2157	+	10.32	0.00015	0.75
NFE2L2(MA0150.1)	ATGAGACAGCC	311	+	9.34	0.000325	1.62
NFE2L2(MA0150.1)	CTGAGACAGCA	1288	-	9.05	0.0004	2
NFE2L2(MA0150.1)	CTGATTTTGCA	1049	-	8.87	0.000475	2.37
NFE2L2(MA0150.1)	ATTCCTCAGCA	1104	-	7.59	0.0009	4.5
NC_000018.9:61139144-61144143 Homo sapiens chromosome 18, GRCh37.p13 Primary Assembly	SERPINB5 NM_002639
Name	Sequence	Position(0-based)	Strand	Score	p-value	E-value
NFE2L2(MA0150.1)	ATTACTCAGCA	729	-	13.55	2.5e-05	0.125
NFE2L2(MA0150.1)	GTGACAGAGCA	4174	-	12.63	5e-05	0.249
NFE2L2(MA0150.1)	ATGACTCTGCT	3571	+	12.17	5e-05	0.249
NFE2L2(MA0150.1)	ATTACTCAGC	730	-	7.99	0.000725	3.6
NFE2L2(MA0150.1)	GTGACAAAGAA	1048	-	7.91	0.000775	3.9
NFE2L2(MA0150.1)	GTGCCACTGCA	1331	+	7.69	0.00085	4.2
NFE2L2(MA0150.1)	ATTAATCAGCA	2327	+	7.36	0.00095	4.7
AC_000075.1:c114317135-114312136 Rattus norvegicus strain BN; Sprague-Dawley chromosome 7, alternate assembly Rn_Celera, whole genome shotgun sequence	Ago2 NM_021597
Name	Sequence	Position(0-based)	Strand	Score	p-value	E-value
NFE2L2(MA0150.1)	GTGATCATGCA	4813	+	8.57	0.00065	3.2
NFE2L2(MA0150.1)	ATCACTCAGCC	2139	+	8.57	0.00065	3.2
NFE2L2(MA0150.1)	GTGGCTGAGCA	3201	+	8.3	0.00065	3.2
NFE2L2(MA0150.1)	ATGAGCCGGCA	2160	+	8.14	0.000675	3.4
NFE2L2(MA0150.1)	GTGATGGAGCA	2133	-	8.04	0.000725	3.6
NFE2L2(MA0150.1)	GTGAGTGAGCT	852	-	7.51	0.0009	4.5
