# Supplementary material for: Integrated data analysis reveals significant associations of KEAP1 mutations with DNA methylation alterations in lung adenocarcinomas
Source: Aging (Albany NY). 2020 Apr 23;12(8):7183–206. doi: 10.18632/aging.103068 (PMC7202502; doi:10.18632/aging.103068)
Supplement: Supplementary File 6 [file aging-12-103068-s008..xlsx]

## Sheet: Sheet1
Diffrential gene expression between KEAP1.MUT and WT LUAD samples (p < 0.05 )
Gene	Log Ratio	p-Value	q-Value	Tendency
AKR1C2	6.54	5.01e-19	1.15e-15	Over-expressed
GPX2	5.51	4.57e-19	1.15e-15	Over-expressed
AKR1C1	5.31	1.5e-16	1.72e-13	Over-expressed
ABCC2	3.94	1.57e-09	2.69e-07	Over-expressed
AKR1C3	3.66	8.52e-17	1.06e-13	Over-expressed
S100P	3.6	4.78e-14	2.86e-11	Over-expressed
CABYR	3.19	1.7e-15	1.3e-12	Over-expressed
UCHL1	2.99	9.51e-11	2.42e-08	Over-expressed
SLC7A11	2.72	5.31e-15	3.54e-12	Over-expressed
TRIM16L	2.72	1.09e-20	7.49e-17	Over-expressed
NQO1	2.65	1.13e-21	1.56e-17	Over-expressed
CPS1	2.43	0.001271	0.006661	Over-expressed
OSGIN1	2.39	5.02e-14	2.87e-11	Over-expressed
SRXN1	2.37	3.68e-16	3.89e-13	Over-expressed
CYP24A1	2.14	3.985e-05	0.0004706	Over-expressed
TXNRD1	2.09	2.45e-13	1.24e-10	Over-expressed
PIR	2.02	5.52e-20	2.53e-16	Over-expressed
UGDH	1.96	1.95e-18	3.82e-15	Over-expressed
CES1	1.95	0.0001484	0.001286	Over-expressed
PANX2	1.95	5.35e-12	1.79e-09	Over-expressed
CBR3	1.94	2.27e-09	3.71e-07	Over-expressed
SLC7A2	1.9	6.52e-06	0.0001207	Over-expressed
G6PD	1.9	1.1e-13	6.07e-11	Over-expressed
KYNU	1.89	6.88e-06	0.0001251	Over-expressed
CBR1	1.87	1.02e-07	5.677e-06	Over-expressed
NEIL3	1.82	1.89e-07	8.794e-06	Over-expressed
GCLC	1.81	2.17e-08	1.902e-06	Over-expressed
CBX2	1.75	2.38e-12	9.2e-10	Over-expressed
HAL	1.74	0.0001342	0.001183	Over-expressed
RSPO3	1.73	0.0004991	0.003215	Over-expressed
TSPAN7	1.72	3.455e-06	7.678e-05	Over-expressed
CARD14	1.7	4.32e-08	3.039e-06	Over-expressed
PGD	1.68	9.21e-18	1.4e-14	Over-expressed
ABCB6	1.66	7.94e-16	7.27e-13	Over-expressed
PTGR1	1.63	1.21e-13	6.39e-11	Over-expressed
TRIM16	1.63	2.49e-19	8.55e-16	Over-expressed
ENO3	1.59	0.0001793	0.001484	Over-expressed
GCLM	1.59	1.37e-15	1.1e-12	Over-expressed
GSR	1.55	2.24e-18	3.85e-15	Over-expressed
EGF	1.51	4.413e-06	9.112e-05	Over-expressed
NMB	1.51	4.84e-10	1.01e-07	Over-expressed
HACD1	1.5	1.44e-07	7.131e-06	Over-expressed
TESC	1.48	0.0005475	0.003444	Over-expressed
OPN3	1.48	1.04e-09	1.93e-07	Over-expressed
ME1	1.48	1.86e-12	7.51e-10	Over-expressed
MAP2	1.46	7.65e-07	2.507e-05	Over-expressed
SLC16A14	1.44	4.933e-05	0.0005503	Over-expressed
LYPD3	1.42	0.0001187	0.001083	Over-expressed
TSKU	1.41	2.95e-11	9e-09	Over-expressed
DDIT4L	1.39	0.0001323	0.001174	Over-expressed
GULP1	1.39	1.21e-12	5.15e-10	Over-expressed
NOTUM	1.38	0.005059	0.0194	Over-expressed
EYS	1.37	0.0001087	0.001014	Over-expressed
TALDO1	1.36	6.26e-16	6.14e-13	Over-expressed
SDCBP2	1.35	0.0001198	0.001091	Over-expressed
B4GALNT1	1.3	0.0004285	0.00287	Over-expressed
PFN2	1.3	1.22e-07	6.395e-06	Over-expressed
SMOC1	1.29	0.02	0.0561	Over-expressed
CMBL	1.28	1.561e-05	0.000234	Over-expressed
EPHX1	1.27	1.811e-05	0.0002601	Over-expressed
RASD1	1.26	0.0002349	0.001806	Over-expressed
BTBD11	1.23	0.0003124	0.002257	Over-expressed
ADPRHL1	1.22	6.32e-08	4.151e-06	Over-expressed
ADSSL1	1.2	4.447e-06	9.156e-05	Over-expressed
ODC1	1.19	9.49e-05	0.0009108	Over-expressed
KRTCAP3	1.17	6.395e-06	0.0001196	Over-expressed
GPAT3	1.17	9.67e-07	3.021e-05	Over-expressed
2019-03-01	1.15	0.0001602	0.001359	Over-expressed
BAG2	1.15	1.56e-08	1.518e-06	Over-expressed
MGST1	1.14	3.56e-09	5.25e-07	Over-expressed
LRP8	1.14	7.68e-11	2.07e-08	Over-expressed
TXN	1.14	2.2e-11	6.86e-09	Over-expressed
AIFM2	1.13	8.47e-16	7.27e-13	Over-expressed
HTATIP2	1.13	2.45e-17	3.36e-14	Over-expressed
KRT81	1.11	0.0181	0.0519	Over-expressed
ATP6V1B1	1.11	0.003697	0.0152	Over-expressed
RAB26	1.11	3.186e-05	0.0004021	Over-expressed
GCNT3	1.09	0.005737	0.0213	Over-expressed
IDH1	1.09	3.38e-13	1.6e-10	Over-expressed
RHOV	1.08	0.004336	0.0172	Over-expressed
TACC2	1.08	8.7e-07	2.778e-05	Over-expressed
KLB	1.07	0.005757	0.0214	Over-expressed
SULT1A2	1.06	1.187e-05	0.0001912	Over-expressed
PDE4D	1.05	7.765e-05	0.0007818	Over-expressed
MISP	1.05	3.127e-06	7.107e-05	Over-expressed
BLVRB	1.05	1.07e-07	5.904e-06	Over-expressed
PLA2G4A	1.04	0.001104	0.005965	Over-expressed
F12	1.03	7.763e-06	0.0001365	Over-expressed
C5ORF30	1.03	3.77e-12	1.36e-09	Over-expressed
AVPI1	1.02	1.432e-05	0.0002212	Over-expressed
DLGAP1-AS1	1.02	3.79e-07	1.463e-05	Over-expressed
GSTP1	1	9.79e-10	1.87e-07	Over-expressed
COA6	1	4.43e-10	9.36e-08	Over-expressed
TPD52L1	0.99	1.551e-05	0.0002328	Over-expressed
DUSP4	0.98	0.002321	0.0106	Over-expressed
ACKR3	0.98	0.0005185	0.003309	Over-expressed
BMP6	0.96	0.004166	0.0167	Over-expressed
SEMA4G	0.96	0.0001746	0.001458	Over-expressed
PRDX1	0.95	2.41e-12	9.2e-10	Over-expressed
GAS5	0.94	5.548e-05	0.0006013	Over-expressed
MSRB1	0.94	2.17e-07	9.761e-06	Over-expressed
LAMA3	0.93	0.0102	0.0334	Over-expressed
FECH	0.93	1.11e-12	4.92e-10	Over-expressed
HIST1H2BC	0.92	0.0004795	0.003113	Over-expressed
OIP5	0.91	0.0004093	0.002771	Over-expressed
FURIN	0.91	0.0001381	0.001212	Over-expressed
BICDL1	0.91	6.437e-05	0.0006727	Over-expressed
SNHG29	0.91	1.585e-06	4.363e-05	Over-expressed
SULT1A3	0.91	2.09e-08	1.873e-06	Over-expressed
SLPI	0.9	0.0174	0.0504	Over-expressed
SIK1	0.9	0.0003119	0.002256	Over-expressed
CHRNA5	0.89	0.003166	0.0135	Over-expressed
ALDH3A2	0.89	1.807e-05	0.0002598	Over-expressed
LDHD	0.88	0.0008193	0.004759	Over-expressed
PAQR5	0.88	0.0002309	0.001787	Over-expressed
LINC00239	0.88	0.0001807	0.001491	Over-expressed
THNSL2	0.87	0.0001595	0.001355	Over-expressed
IRS2	0.87	0.0001329	0.001177	Over-expressed
CBLC	0.87	5.256e-05	0.0005764	Over-expressed
ID1	0.86	0.0004467	0.002953	Over-expressed
GGH	0.86	0.0003835	0.002632	Over-expressed
SPSB2	0.86	8.33e-06	0.0001448	Over-expressed
HIST1H4H	0.85	0.0002831	0.002088	Over-expressed
PCSK6	0.85	0.0001287	0.001151	Over-expressed
CLYBL	0.85	2.254e-05	0.0003104	Over-expressed
EBPL	0.85	4.16e-08	2.977e-06	Over-expressed
PCOLCE2	0.84	0.0272	0.0714	Over-expressed
TKT	0.84	7.83e-09	9.43e-07	Over-expressed
RAB5IF	0.84	7.85e-10	1.54e-07	Over-expressed
ARHGEF4	0.83	0.0165	0.0484	Over-expressed
CHML	0.83	8.652e-06	0.0001493	Over-expressed
HSBP1L1	0.83	1.38e-08	1.416e-06	Over-expressed
MPP3	0.82	9.26e-07	2.916e-05	Over-expressed
TMEM256	0.82	3.39e-07	1.35e-05	Over-expressed
PTGES	0.81	0.009139	0.0307	Over-expressed
SLC27A2	0.81	0.001838	0.008882	Over-expressed
SULT1A1	0.81	1.407e-05	0.0002183	Over-expressed
KTN1-AS1	0.81	3.68e-08	2.775e-06	Over-expressed
BASP1	0.8	0.0008479	0.00487	Over-expressed
FTL	0.8	9.12e-07	2.886e-05	Over-expressed
TMEM17	0.8	4.86e-08	3.32e-06	Over-expressed
METAP1D	0.8	1.94e-09	3.25e-07	Over-expressed
SCARB1	0.79	2.406e-06	5.985e-05	Over-expressed
C16ORF74	0.78	0.0257	0.0683	Over-expressed
DESI1	0.78	1.11e-07	6.055e-06	Over-expressed
RIT1	0.78	3.14e-10	7.18e-08	Over-expressed
SLC16A4	0.77	0.0447	0.105	Over-expressed
PBK	0.77	0.005029	0.0193	Over-expressed
HIST1H1C	0.77	0.0013	0.006785	Over-expressed
LPAR1	0.77	0.0001046	0.0009848	Over-expressed
TP53I3	0.77	5.65e-07	1.971e-05	Over-expressed
DLEU1	0.77	2.29e-07	1.013e-05	Over-expressed
ATP5MC1	0.77	3.2e-08	2.523e-06	Over-expressed
ACOT13	0.77	1.28e-08	1.33e-06	Over-expressed
DARS2	0.77	2.22e-14	1.39e-11	Over-expressed
SNCG	0.76	0.047	0.109	Over-expressed
CHL1	0.76	0.047	0.109	Over-expressed
RAP1GAP	0.76	0.009939	0.0328	Over-expressed
OTX1	0.76	0.0005376	0.003396	Over-expressed
HYPK	0.76	6.74e-10	1.36e-07	Over-expressed
NR4A2	0.75	0.006355	0.0231	Over-expressed
ALDH3B1	0.75	0.002718	0.012	Over-expressed
S100A14	0.75	0.001677	0.008259	Over-expressed
SHTN1	0.75	1.47e-08	1.449e-06	Over-expressed
C1QBP	0.75	2.25e-09	3.71e-07	Over-expressed
CGREF1	0.74	0.036	0.0887	Over-expressed
SNHG4	0.74	0.002693	0.0119	Over-expressed
CHCHD10	0.74	0.0001035	0.0009774	Over-expressed
IMPA2	0.74	3.613e-05	0.0004375	Over-expressed
MRPL24	0.74	4.31e-08	3.039e-06	Over-expressed
NAXE	0.74	1.22e-08	1.288e-06	Over-expressed
RASGEF1A	0.73	0.006627	0.0239	Over-expressed
HIST1H2BN	0.73	0.0002767	0.002054	Over-expressed
EFNA3	0.73	0.0001328	0.001177	Over-expressed
TTC39C	0.73	1.166e-05	0.0001887	Over-expressed
HSF4	0.72	0.006317	0.023	Over-expressed
AGA	0.72	2.344e-05	0.0003193	Over-expressed
YBEY	0.72	1.518e-05	0.0002289	Over-expressed
HYAL1	0.71	0.0232	0.0627	Over-expressed
SAMD13	0.71	0.007751	0.027	Over-expressed
NOXA1	0.71	0.006068	0.0223	Over-expressed
THAP7-AS1	0.71	0.001219	0.006448	Over-expressed
NTPCR	0.71	3.04e-07	1.256e-05	Over-expressed
SORD	0.71	9.38e-09	1.039e-06	Over-expressed
LYPD1	0.7	0.0261	0.069	Over-expressed
SYT7	0.7	0.0129	0.0402	Over-expressed
STC2	0.7	0.0115	0.0368	Over-expressed
TDP2	0.7	2.779e-06	6.54e-05	Over-expressed
TBCE	0.7	6.56e-11	1.84e-08	Over-expressed
TRIM7	0.69	0.0224	0.0611	Over-expressed
ATP1B1	0.69	0.0002328	0.001796	Over-expressed
CHAC2	0.69	2.109e-05	0.0002956	Over-expressed
HDDC3	0.69	9.19e-08	5.347e-06	Over-expressed
GSTO2	0.68	0.0253	0.0674	Over-expressed
SCNN1A	0.68	0.007717	0.027	Over-expressed
POLR3H	0.68	0.002281	0.0105	Over-expressed
CEACAM19	0.68	0.001506	0.007604	Over-expressed
EGFL7	0.68	0.001486	0.007533	Over-expressed
NUDT7	0.68	0.0001368	0.001202	Over-expressed
CENPX	0.68	3.451e-05	0.0004231	Over-expressed
LINC00467	0.68	2.152e-05	0.0002994	Over-expressed
ABHD4	0.68	6.78e-09	8.61e-07	Over-expressed
PRDX6	0.68	2.49e-10	5.91e-08	Over-expressed
TINCR	0.67	0.0406	0.0974	Over-expressed
METTL27	0.67	0.0126	0.0394	Over-expressed
OVGP1	0.67	0.004811	0.0186	Over-expressed
NAMPT	0.67	0.001379	0.007091	Over-expressed
KCNE3	0.67	0.001357	0.007004	Over-expressed
C1ORF53	0.67	0.0005728	0.003575	Over-expressed
NT5M	0.67	0.0002535	0.001923	Over-expressed
NECAB3	0.67	0.0001275	0.001142	Over-expressed
CYC1	0.67	2.927e-05	0.0003767	Over-expressed
TLCD1	0.67	6.694e-06	0.0001224	Over-expressed
RCCD1	0.67	6.63e-08	4.294e-06	Over-expressed
MAFG	0.67	8.89e-09	1.018e-06	Over-expressed
LRAT	0.66	0.0358	0.0883	Over-expressed
HIST2H2AA3	0.66	0.009748	0.0323	Over-expressed
TMEM92	0.66	0.002823	0.0123	Over-expressed
ZP3	0.66	0.0009018	0.005117	Over-expressed
PMM1	0.66	0.0005875	0.003637	Over-expressed
GEMIN8P4	0.66	5.159e-05	0.0005695	Over-expressed
KIAA1549	0.66	4.779e-05	0.0005366	Over-expressed
TTC32	0.66	3.73e-06	8.141e-05	Over-expressed
SQSTM1	0.66	7.79e-07	2.541e-05	Over-expressed
MAP2K6	0.65	0.0172	0.0501	Over-expressed
MATN2	0.65	0.0105	0.0341	Over-expressed
CRACR2B	0.65	0.007776	0.0271	Over-expressed
GNAL	0.65	0.004175	0.0167	Over-expressed
CTSL	0.65	0.002873	0.0125	Over-expressed
WNT3	0.65	0.0003857	0.002645	Over-expressed
L3HYPDH	0.65	6.857e-05	0.0007063	Over-expressed
KNSTRN	0.65	8.328e-06	0.0001448	Over-expressed
LTBR	0.65	1.482e-06	4.187e-05	Over-expressed
MFF	0.65	1.27e-07	6.52e-06	Over-expressed
COX20	0.65	5.45e-08	3.67e-06	Over-expressed
SOX15	0.64	0.0409	0.0981	Over-expressed
MFSD3	0.64	0.0032	0.0136	Over-expressed
DPM3	0.64	0.002605	0.0116	Over-expressed
SNHG5	0.64	0.002233	0.0103	Over-expressed
BFSP1	0.64	0.001362	0.007023	Over-expressed
RPL22L1	0.64	0.000872	0.004985	Over-expressed
NAA38	0.64	0.0001759	0.001465	Over-expressed
NQO2	0.64	6.174e-05	0.0006506	Over-expressed
BNIP3	0.64	4.378e-05	0.0005048	Over-expressed
UBXN8	0.64	1.629e-05	0.0002417	Over-expressed
NOL3	0.64	1.474e-05	0.0002251	Over-expressed
EML2	0.64	8.655e-06	0.0001493	Over-expressed
ELL3	0.64	5.859e-06	0.0001125	Over-expressed
PEMT	0.64	3.66e-07	1.426e-05	Over-expressed
SLC3A2	0.64	2.61e-07	1.126e-05	Over-expressed
OBSL1	0.63	0.0118	0.0373	Over-expressed
CSGALNACT1	0.63	0.004559	0.0179	Over-expressed
MEGF9	0.63	0.002339	0.0107	Over-expressed
CHPT1	0.63	0.002047	0.009664	Over-expressed
OLMALINC	0.63	0.0008078	0.004706	Over-expressed
STARD10	0.63	0.0004355	0.002903	Over-expressed
C1ORF56	0.63	3.22e-05	0.0004028	Over-expressed
MPST	0.63	3.059e-05	0.0003915	Over-expressed
NT5C	0.63	1.575e-05	0.0002349	Over-expressed
FAM86JP	0.63	1.203e-05	0.000193	Over-expressed
SCCPDH	0.63	2.188e-06	5.57e-05	Over-expressed
SFXN4	0.63	8.66e-08	5.106e-06	Over-expressed
EMC6	0.63	3.98e-08	2.94e-06	Over-expressed
MAOA	0.62	0.0317	0.0803	Over-expressed
TMTC1	0.62	0.0291	0.0752	Over-expressed
VEGFC	0.62	0.006319	0.023	Over-expressed
RPS7	0.62	0.0003396	0.0024	Over-expressed
TST	0.62	0.0003293	0.002352	Over-expressed
ECE2	0.62	0.0002504	0.001902	Over-expressed
EMG1	0.62	7.785e-05	0.0007832	Over-expressed
KATNBL1	0.62	5.929e-05	0.0006326	Over-expressed
MIEN1	0.62	4.53e-05	0.0005145	Over-expressed
GABARAPL1	0.62	4.522e-05	0.0005145	Over-expressed
DTYMK	0.62	3.438e-05	0.0004223	Over-expressed
EIF5A	0.62	1.01e-07	5.643e-06	Over-expressed
SMPDL3B	0.61	0.0102	0.0335	Over-expressed
HMGB3	0.61	0.008985	0.0303	Over-expressed
RAPGEFL1	0.61	0.004965	0.0191	Over-expressed
CCDC110	0.61	0.003382	0.0142	Over-expressed
EID3	0.61	0.0007018	0.004189	Over-expressed
PAM16	0.61	0.0006606	0.003998	Over-expressed
CKS1B	0.61	0.0006063	0.003727	Over-expressed
SNHG8	0.61	0.0005183	0.003309	Over-expressed
SLC26A1	0.61	0.0004601	0.003023	Over-expressed
GPRC5D	0.61	0.0004378	0.002912	Over-expressed
RPS16	0.61	0.0002154	0.001699	Over-expressed
RPS17	0.61	0.0001213	0.001102	Over-expressed
PIM3	0.61	9.998e-05	0.0009488	Over-expressed
CLDN7	0.61	8.633e-05	0.0008498	Over-expressed
SLC48A1	0.61	8.18e-08	4.964e-06	Over-expressed
CCT3	0.61	8.41e-11	2.18e-08	Over-expressed
IRX3	0.6	0.0364	0.0896	Over-expressed
SLC7A5	0.6	0.0244	0.0654	Over-expressed
ANXA9	0.6	0.008587	0.0292	Over-expressed
RAC3	0.6	0.007975	0.0276	Over-expressed
FAM86B1	0.6	0.006371	0.0232	Over-expressed
SLC45A4	0.6	0.002835	0.0123	Over-expressed
ABLIM1	0.6	0.0007355	0.004353	Over-expressed
SELENOI	0.6	2.405e-06	5.985e-05	Over-expressed
HSPE1	0.6	1.605e-06	4.391e-05	Over-expressed
GCNT2	0.6	1.273e-06	3.751e-05	Over-expressed
ATP5MC2	0.6	4.11e-07	1.554e-05	Over-expressed
CHMP1B	0.6	7.49e-09	9.26e-07	Over-expressed
SDHC	0.6	3.73e-09	5.34e-07	Over-expressed
GHITM	0.6	4.43e-10	9.36e-08	Over-expressed
FA2H	0.59	0.0176	0.0509	Over-expressed
NOSTRIN	0.59	0.014	0.0428	Over-expressed
ZSCAN31	0.59	0.008527	0.0291	Over-expressed
TMPRSS13	0.59	0.00739	0.0261	Over-expressed
MAPK12	0.59	0.004227	0.0168	Over-expressed
SLC27A5	0.59	0.003007	0.0129	Over-expressed
RPH3AL	0.59	0.00125	0.006579	Over-expressed
ASPSCR1	0.59	0.0005533	0.003476	Over-expressed
PHPT1	0.59	0.0005034	0.003235	Over-expressed
NUDT6	0.59	0.0002277	0.00177	Over-expressed
BGLAP	0.59	0.0001643	0.001387	Over-expressed
ABCC1	0.59	0.0001363	0.001199	Over-expressed
PTRHD1	0.59	4.023e-05	0.0004738	Over-expressed
RHBDD3	0.59	3.192e-05	0.0004021	Over-expressed
TMEM99	0.59	3.078e-05	0.0003931	Over-expressed
RPP40	0.59	1.779e-05	0.0002577	Over-expressed
SOWAHC	0.59	9.896e-06	0.0001661	Over-expressed
POP5	0.59	9.744e-06	0.0001642	Over-expressed
NDUFB1	0.59	7.775e-06	0.0001365	Over-expressed
ATP5MD	0.59	7.47e-06	0.0001337	Over-expressed
PNKD	0.59	5.138e-06	0.0001017	Over-expressed
WDR12	0.59	3.19e-07	1.294e-05	Over-expressed
MPDU1	0.59	4.34e-08	3.039e-06	Over-expressed
GLI4	0.58	0.003766	0.0154	Over-expressed
SFN	0.58	0.002868	0.0124	Over-expressed
DCXR	0.58	0.002137	0.009983	Over-expressed
IGF1R	0.58	0.001888	0.009069	Over-expressed
ZNF467	0.58	0.00156	0.007817	Over-expressed
GLA	0.58	0.0001803	0.001489	Over-expressed
CHP1	0.58	0.0001296	0.001158	Over-expressed
TEAD4	0.58	8.46e-05	0.0008365	Over-expressed
ETFB	0.58	2.157e-05	0.0002999	Over-expressed
MCEE	0.58	1.681e-05	0.0002477	Over-expressed
CENPJ	0.58	1.611e-05	0.0002394	Over-expressed
PHB2	0.58	1.137e-05	0.000185	Over-expressed
CCDC58	0.58	1.107e-05	0.0001814	Over-expressed
TMEM116	0.58	6.29e-06	0.000118	Over-expressed
NIT2	0.58	3.38e-07	1.347e-05	Over-expressed
SOD1	0.58	3.1e-07	1.275e-05	Over-expressed
FTH1P3	0.58	8.59e-08	5.094e-06	Over-expressed
EIF5AL1	0.58	7.83e-08	4.833e-06	Over-expressed
ABLIM2	0.57	0.0224	0.0612	Over-expressed
MTMR7	0.57	0.022	0.0603	Over-expressed
TNFSF9	0.57	0.0162	0.0479	Over-expressed
UBE2T	0.57	0.008804	0.0298	Over-expressed
HSPA12A	0.57	0.004581	0.0179	Over-expressed
ANKRD9	0.57	0.004557	0.0179	Over-expressed
APOM	0.57	0.004299	0.0171	Over-expressed
FAM71E1	0.57	0.003937	0.0159	Over-expressed
ATP5MF	0.57	0.001258	0.006615	Over-expressed
DBIL5P	0.57	0.0007617	0.00448	Over-expressed
RPL17	0.57	0.0003747	0.002584	Over-expressed
MZT2A	0.57	0.0003694	0.002557	Over-expressed
APRT	0.57	0.0002629	0.001981	Over-expressed
GSTZ1	0.57	0.0001396	0.001224	Over-expressed
LIAS	0.57	6.074e-06	0.0001152	Over-expressed
ATRAID	0.57	4.089e-06	8.687e-05	Over-expressed
HMBS	0.57	1.891e-06	5.023e-05	Over-expressed
RASSF9	0.56	0.0494	0.113	Over-expressed
TLE6	0.56	0.02	0.0561	Over-expressed
FASN	0.56	0.0194	0.0548	Over-expressed
TMEM254-AS1	0.56	0.007219	0.0256	Over-expressed
C17ORF53	0.56	0.006962	0.0249	Over-expressed
RAB25	0.56	0.001997	0.009484	Over-expressed
NPM3	0.56	0.0002988	0.002179	Over-expressed
SLC25A15	0.56	0.0001569	0.001336	Over-expressed
B9D1	0.56	0.0001179	0.001081	Over-expressed
NME4	0.56	3.031e-05	0.0003886	Over-expressed
C2ORF76	0.56	2.198e-05	0.0003042	Over-expressed
MTHFS	0.56	7.449e-06	0.0001337	Over-expressed
TYSND1	0.56	2.122e-06	5.441e-05	Over-expressed
COX5A	0.56	6.46e-07	2.178e-05	Over-expressed
NUDT5	0.56	3.35e-07	1.341e-05	Over-expressed
FTH1	0.56	1.43e-07	7.099e-06	Over-expressed
FLAD1	0.56	1.38e-07	6.907e-06	Over-expressed
SPIRE2	0.55	0.0401	0.0965	Over-expressed
FAM72D	0.55	0.0364	0.0895	Over-expressed
RIMKLB	0.55	0.0334	0.0838	Over-expressed
TVP23A	0.55	0.025	0.0668	Over-expressed
MAFK	0.55	0.0182	0.0521	Over-expressed
MSL3P1	0.55	0.009749	0.0323	Over-expressed
FAM41C	0.55	0.008463	0.0289	Over-expressed
GNAI1	0.55	0.008349	0.0286	Over-expressed
ATP2C2	0.55	0.008076	0.0279	Over-expressed
KIF21A	0.55	0.0002061	0.001641	Over-expressed
GTF3A	0.55	0.000196	0.001582	Over-expressed
CHCHD5	0.55	5.1e-05	0.0005652	Over-expressed
TMED3	0.55	4.685e-05	0.0005286	Over-expressed
SNRPA1	0.55	1.263e-05	0.0002004	Over-expressed
SPR	0.55	9.194e-06	0.0001572	Over-expressed
ATP6V1E2	0.55	8.28e-07	2.682e-05	Over-expressed
NDUFB8	0.55	6.78e-07	2.26e-05	Over-expressed
C1ORF43	0.55	6.2e-07	2.108e-05	Over-expressed
PSMB6	0.55	1.41e-08	1.416e-06	Over-expressed
PRDX3	0.55	1.12e-08	1.187e-06	Over-expressed
COMTD1	0.54	0.0197	0.0556	Over-expressed
GPRC5A	0.54	0.007865	0.0274	Over-expressed
TRPV1	0.54	0.003561	0.0148	Over-expressed
SLC25A37	0.54	0.001268	0.006654	Over-expressed
WEE2-AS1	0.54	0.001023	0.00562	Over-expressed
MAP3K14-AS1	0.54	0.001013	0.005576	Over-expressed
FAHD2B	0.54	0.0008621	0.004943	Over-expressed
TMEM141	0.54	0.0005366	0.003391	Over-expressed
ECI1	0.54	0.0003062	0.00222	Over-expressed
KLF5	0.54	0.0001851	0.001514	Over-expressed
COX6A1	0.54	0.0001536	0.001314	Over-expressed
COX5B	0.54	0.0001365	0.0012	Over-expressed
SLC50A1	0.54	6.3e-05	0.0006614	Over-expressed
MRPL57	0.54	4.657e-05	0.0005259	Over-expressed
MRM1	0.54	3.892e-05	0.0004611	Over-expressed
MRPS21	0.54	3.215e-05	0.0004028	Over-expressed
DDT	0.54	2.082e-05	0.0002929	Over-expressed
CWF19L1	0.54	5.042e-06	0.0001006	Over-expressed
MRPL53	0.54	4.826e-06	9.767e-05	Over-expressed
ATP5MC3	0.54	2.781e-06	6.54e-05	Over-expressed
CEP85	0.54	2.45e-06	6.02e-05	Over-expressed
VDAC2	0.54	1.525e-06	4.266e-05	Over-expressed
TRUB2	0.54	5.94e-07	2.051e-05	Over-expressed
HSF2BP	0.53	0.0112	0.0361	Over-expressed
IL17RE	0.53	0.0109	0.0353	Over-expressed
MIF	0.53	0.005619	0.021	Over-expressed
TSTD1	0.53	0.004317	0.0171	Over-expressed
SNHG6	0.53	0.003006	0.0129	Over-expressed
C19ORF48	0.53	0.002494	0.0112	Over-expressed
EXOSC5	0.53	0.001438	0.007339	Over-expressed
KPTN	0.53	0.0008261	0.004789	Over-expressed
FAM83H	0.53	0.0006738	0.004053	Over-expressed
MRPS12	0.53	0.0004981	0.003211	Over-expressed
PUS1	0.53	0.0001815	0.001493	Over-expressed
RPL37A	0.53	9.518e-05	0.0009127	Over-expressed
TMEM14A	0.53	8.24e-05	0.0008188	Over-expressed
KRTCAP2	0.53	2.741e-05	0.0003584	Over-expressed
TMEM223	0.53	1.71e-05	0.0002506	Over-expressed
SLC16A13	0.53	5.508e-06	0.0001071	Over-expressed
NUDT15	0.53	4.022e-06	8.59e-05	Over-expressed
TSNAX	0.53	1.391e-06	3.978e-05	Over-expressed
PSMD14	0.53	7.73e-07	2.528e-05	Over-expressed
CUTC	0.53	5.11e-07	1.843e-05	Over-expressed
OVCA2	0.53	3.81e-07	1.467e-05	Over-expressed
METTL21A	0.53	8.61e-08	5.094e-06	Over-expressed
PSMD4	0.53	7.56e-09	9.27e-07	Over-expressed
CDCA3	0.52	0.0446	0.105	Over-expressed
SEC11C	0.52	0.0101	0.0333	Over-expressed
SLC16A5	0.52	0.009045	0.0305	Over-expressed
POLR3G	0.52	0.005548	0.0208	Over-expressed
KCTD15	0.52	0.004281	0.017	Over-expressed
TAPT1-AS1	0.52	0.002114	0.009906	Over-expressed
PMEL	0.52	0.001265	0.006646	Over-expressed
DECR2	0.52	0.0003726	0.002572	Over-expressed
RPL26	0.52	0.0003327	0.002363	Over-expressed
PLPP5	0.52	0.0001249	0.001129	Over-expressed
FKBP4	0.52	0.0001193	0.001088	Over-expressed
FZD7	0.52	9.827e-05	0.0009358	Over-expressed
SERF2	0.52	7.123e-05	0.0007298	Over-expressed
TMEM14B	0.52	5.23e-05	0.0005754	Over-expressed
EHBP1	0.52	1.775e-05	0.0002574	Over-expressed
PCBD1	0.52	5.437e-06	0.0001061	Over-expressed
OIP5-AS1	0.52	2.94e-07	1.232e-05	Over-expressed
PRMT3	0.52	1.32e-07	6.708e-06	Over-expressed
SNUPN	0.52	2.29e-08	1.939e-06	Over-expressed
SMOX	0.51	0.0316	0.08	Over-expressed
FAM222A	0.51	0.0178	0.0514	Over-expressed
PLD3	0.51	0.0145	0.0439	Over-expressed
MTHFD2	0.51	0.0104	0.0339	Over-expressed
ZFAS1	0.51	0.005044	0.0193	Over-expressed
FKBP11	0.51	0.004226	0.0168	Over-expressed
DNAJC15	0.51	0.003842	0.0156	Over-expressed
RPSAP9	0.51	0.002943	0.0127	Over-expressed
LRP12	0.51	0.00237	0.0108	Over-expressed
RPP25	0.51	0.002141	0.009989	Over-expressed
RPS19	0.51	0.001856	0.008943	Over-expressed
DNPH1	0.51	0.001794	0.008706	Over-expressed
ZNF692	0.51	0.001311	0.006823	Over-expressed
KATNBL1P6	0.51	0.001228	0.006487	Over-expressed
PTP4A1	0.51	0.001057	0.005757	Over-expressed
RPLP0	0.51	0.00104	0.005698	Over-expressed
TMEM9	0.51	0.000922	0.005208	Over-expressed
GRTP1	0.51	0.0005628	0.003524	Over-expressed
FBXO22-AS1	0.51	6.359e-05	0.0006661	Over-expressed
BYSL	0.51	2.576e-05	0.0003438	Over-expressed
FRAT2	0.51	1.63e-05	0.0002417	Over-expressed
VDAC3	0.51	1.421e-05	0.0002197	Over-expressed
MED11	0.51	1.398e-05	0.0002177	Over-expressed
IER3IP1	0.51	1.356e-05	0.0002127	Over-expressed
MTX1	0.51	8.742e-06	0.00015	Over-expressed
PMF1	0.51	8.07e-06	0.0001412	Over-expressed
NDUFV2	0.51	5.456e-06	0.0001063	Over-expressed
MRPS11	0.51	1.991e-06	5.207e-05	Over-expressed
EMC4	0.51	3.19e-08	2.523e-06	Over-expressed
COX15	0.51	5.75e-13	2.63e-10	Over-expressed
ELMO3	0.5	0.0135	0.0417	Over-expressed
NUDT13	0.5	0.00568	0.0212	Over-expressed
SPTSSA	0.5	0.005042	0.0193	Over-expressed
LAMTOR4	0.5	0.004387	0.0174	Over-expressed
FBXL19-AS1	0.5	0.003925	0.0159	Over-expressed
FKBP2	0.5	0.001829	0.008844	Over-expressed
RPL13	0.5	0.001675	0.008255	Over-expressed
NME1	0.5	0.001175	0.006264	Over-expressed
CYB5D2	0.5	0.0004715	0.003076	Over-expressed
IFT27	0.5	0.0001186	0.001083	Over-expressed
PPCDC	0.5	0.0001036	0.0009774	Over-expressed
THEM4	0.5	6.978e-05	0.000717	Over-expressed
COX4I1	0.5	5.659e-05	0.0006105	Over-expressed
BZW1	0.5	4.325e-05	0.0005004	Over-expressed
CENPS	0.5	3.496e-05	0.0004275	Over-expressed
HAX1	0.5	3.457e-05	0.0004231	Over-expressed
RPL4	0.5	2.719e-05	0.0003563	Over-expressed
C15ORF61	0.5	1.487e-05	0.0002262	Over-expressed
TMEM254	0.5	1.311e-05	0.0002072	Over-expressed
HSPD1	0.5	9.394e-06	0.00016	Over-expressed
PSMA4	0.5	4.64e-07	1.713e-05	Over-expressed
E2F6	0.5	2.15e-08	1.896e-06	Over-expressed
NUP88	0.5	5.34e-09	7.33e-07	Over-expressed
TVP23B	0.5	3.3e-09	4.92e-07	Over-expressed
PAQR6	0.49	0.0458	0.107	Over-expressed
ASB9	0.49	0.0306	0.0782	Over-expressed
SPECC1	0.49	0.011	0.0356	Over-expressed
RPLP1	0.49	0.004186	0.0167	Over-expressed
ZNF503-AS2	0.49	0.002863	0.0124	Over-expressed
GAPDH	0.49	0.001808	0.008759	Over-expressed
DNA2	0.49	0.001352	0.006989	Over-expressed
ADI1	0.49	0.0006929	0.004144	Over-expressed
RAN	0.49	0.0004442	0.002943	Over-expressed
PTS	0.49	0.0004178	0.002818	Over-expressed
NOL12	0.49	0.0003888	0.00266	Over-expressed
C11ORF1	0.49	0.0002149	0.001696	Over-expressed
LYPLAL1	0.49	8.486e-05	0.0008377	Over-expressed
NOP2	0.49	7.832e-05	0.0007873	Over-expressed
MTG1	0.49	5.167e-05	0.0005699	Over-expressed
GTF2A2	0.49	3.208e-05	0.0004028	Over-expressed
NDUFB4	0.49	3.081e-05	0.0003931	Over-expressed
TXNL1	0.49	1.718e-05	0.0002513	Over-expressed
SPRYD4	0.49	1.55e-05	0.0002328	Over-expressed
METTL5	0.49	1.021e-05	0.0001706	Over-expressed
EIPR1	0.49	4.535e-06	9.322e-05	Over-expressed
RRNAD1	0.49	3.223e-06	7.255e-05	Over-expressed
VPS37A	0.49	2.651e-06	6.331e-05	Over-expressed
TVP23C	0.49	1.04e-07	5.756e-06	Over-expressed
HDGF	0.49	3.7e-08	2.778e-06	Over-expressed
NDUFS2	0.49	5.5e-09	7.33e-07	Over-expressed
ATIC	0.49	9.68e-10	1.87e-07	Over-expressed
PYROXD2	0.48	0.0414	0.099	Over-expressed
PCLAF	0.48	0.0281	0.073	Over-expressed
LRFN4	0.48	0.0209	0.0581	Over-expressed
HIST1H2AC	0.48	0.019	0.0541	Over-expressed
PVT1	0.48	0.0153	0.0458	Over-expressed
AOC2	0.48	0.0142	0.0433	Over-expressed
PPP1R35	0.48	0.009073	0.0305	Over-expressed
RPSA	0.48	0.005592	0.0209	Over-expressed
RPS3	0.48	0.003147	0.0134	Over-expressed
SNRPG	0.48	0.00157	0.00785	Over-expressed
GKAP1	0.48	0.001185	0.006309	Over-expressed
COA3	0.48	0.0009856	0.005475	Over-expressed
BOLA3	0.48	0.0006501	0.003952	Over-expressed
IDI2	0.48	0.0006053	0.003724	Over-expressed
MRPS28	0.48	0.0005737	0.003577	Over-expressed
NME2	0.48	0.0004433	0.002939	Over-expressed
PEX11A	0.48	0.0003522	0.00247	Over-expressed
CREG1	0.48	6.168e-05	0.0006505	Over-expressed
ATP5MPL	0.48	4.207e-05	0.00049	Over-expressed
SHC1	0.48	3.771e-05	0.0004522	Over-expressed
C18ORF32	0.48	3.571e-05	0.0004343	Over-expressed
PIGP	0.48	3.558e-05	0.0004331	Over-expressed
TGIF1	0.48	3.403e-05	0.0004204	Over-expressed
MAPKAPK5-AS1	0.48	2.691e-05	0.0003543	Over-expressed
TKFC	0.48	2.03e-05	0.0002871	Over-expressed
WDR61	0.48	1.866e-05	0.0002668	Over-expressed
MGST3	0.48	1.639e-05	0.0002423	Over-expressed
GLRX2	0.48	1.05e-05	0.0001743	Over-expressed
PIGF	0.48	5.427e-06	0.000106	Over-expressed
SPAG7	0.48	2.853e-06	6.652e-05	Over-expressed
LYSMD1	0.48	1.999e-06	5.219e-05	Over-expressed
GYG2	0.47	0.0464	0.108	Over-expressed
LSP1P5	0.47	0.0278	0.0724	Over-expressed
NME2P1	0.47	0.0268	0.0706	Over-expressed
HIST2H4A	0.47	0.0189	0.0538	Over-expressed
KATNAL2	0.47	0.0151	0.0453	Over-expressed
HIST1H2BK	0.47	0.0104	0.034	Over-expressed
TOB1	0.47	0.006718	0.0242	Over-expressed
OAZ3	0.47	0.005255	0.02	Over-expressed
TRAPPC6A	0.47	0.00475	0.0184	Over-expressed
RPL31	0.47	0.002994	0.0129	Over-expressed
ADCY7	0.47	0.002666	0.0118	Over-expressed
NT5DC3	0.47	0.002038	0.009628	Over-expressed
INO80B	0.47	0.001005	0.005548	Over-expressed
RPL23	0.47	0.0004701	0.00307	Over-expressed
RPS24	0.47	0.0004283	0.00287	Over-expressed
CREB3L4	0.47	0.0003558	0.002487	Over-expressed
FOPNL	0.47	0.0003122	0.002256	Over-expressed
ABHD3	0.47	0.0002799	0.002071	Over-expressed
AHCY	0.47	0.0002317	0.00179	Over-expressed
EXOSC8	0.47	0.0001779	0.001477	Over-expressed
LYRM4	0.47	0.0001334	0.001178	Over-expressed
HSD17B7	0.47	0.0001166	0.001069	Over-expressed
LSM4	0.47	0.0001099	0.001023	Over-expressed
IFT43	0.47	0.0001058	0.0009921	Over-expressed
CATSPER2P1	0.47	5.988e-05	0.0006365	Over-expressed
TOMM20	0.47	5.458e-05	0.0005939	Over-expressed
CSNK1E	0.47	3.796e-05	0.0004534	Over-expressed
NOP10	0.47	3.234e-05	0.0004035	Over-expressed
EIF2D	0.47	1.104e-05	0.0001812	Over-expressed
TFB2M	0.47	5.964e-06	0.0001138	Over-expressed
PSMB5	0.47	2.983e-06	6.853e-05	Over-expressed
BLOC1S4	0.47	1.989e-06	5.207e-05	Over-expressed
ATP5F1A	0.47	5.41e-07	1.91e-05	Over-expressed
CACYBP	0.47	3.66e-07	1.426e-05	Over-expressed
C12ORF66	0.47	3.05e-08	2.437e-06	Over-expressed
ATP6V1C2	0.46	0.0497	0.113	Over-expressed
TRIB3	0.46	0.0303	0.0777	Over-expressed
C17ORF97	0.46	0.0232	0.0628	Over-expressed
ASAP2	0.46	0.0176	0.0509	Over-expressed
RPL27	0.46	0.0144	0.0438	Over-expressed
CDNF	0.46	0.008872	0.03	Over-expressed
PIGZ	0.46	0.007896	0.0275	Over-expressed
MYL5	0.46	0.006615	0.0239	Over-expressed
RPSAP58	0.46	0.005805	0.0215	Over-expressed
ENDOV	0.46	0.005426	0.0205	Over-expressed
CCDC122	0.46	0.004569	0.0179	Over-expressed
RPL12	0.46	0.002665	0.0118	Over-expressed
UQCRQ	0.46	0.002604	0.0116	Over-expressed
RSL24D1	0.46	0.001656	0.008183	Over-expressed
IDNK	0.46	0.0009698	0.00542	Over-expressed
ACYP1	0.46	0.0009596	0.005372	Over-expressed
SDF2L1	0.46	0.0008427	0.004858	Over-expressed
CAPN10	0.46	0.000755	0.004448	Over-expressed
MTCP1	0.46	0.0006213	0.003804	Over-expressed
LSM1	0.46	0.0004376	0.002912	Over-expressed
RPL35A	0.46	0.0004178	0.002818	Over-expressed
ERP29	0.46	0.0003417	0.00241	Over-expressed
MPC2	0.46	0.0002419	0.001853	Over-expressed
HSCB	0.46	0.0001347	0.001187	Over-expressed
MRPS36	0.46	0.0001102	0.001024	Over-expressed
CCDC77	0.46	0.0001074	0.001004	Over-expressed
SMIM20	0.46	7.39e-05	0.0007523	Over-expressed
ACSL3	0.46	6.956e-05	0.000716	Over-expressed
HDDC2	0.46	5.874e-05	0.0006282	Over-expressed
ORMDL2	0.46	3.797e-05	0.0004534	Over-expressed
MRPL43	0.46	3.454e-05	0.0004231	Over-expressed
JAGN1	0.46	2.614e-05	0.0003478	Over-expressed
DCLRE1A	0.46	1.796e-05	0.0002593	Over-expressed
TWNK	0.46	1.441e-05	0.0002216	Over-expressed
BBIP1	0.46	1.262e-05	0.0002004	Over-expressed
RUVBL1	0.46	7.672e-06	0.0001359	Over-expressed
MRPL46	0.46	4.792e-06	9.735e-05	Over-expressed
C15ORF40	0.46	4.76e-07	1.74e-05	Over-expressed
BCS1L	0.46	2.17e-07	9.761e-06	Over-expressed
PRPSAP2	0.46	1.26e-07	6.503e-06	Over-expressed
NIT1	0.46	1.13e-07	6.118e-06	Over-expressed
XPNPEP3	0.46	8.21e-08	4.964e-06	Over-expressed
PGAP2	0.46	8.77e-09	1.012e-06	Over-expressed
MFAP1	0.46	1.29e-09	2.29e-07	Over-expressed
ALS2CL	0.45	0.0335	0.0839	Over-expressed
PLA2G6	0.45	0.0314	0.0797	Over-expressed
CCNB1	0.45	0.0278	0.0725	Over-expressed
MYC	0.45	0.0151	0.0454	Over-expressed
TJP3	0.45	0.0135	0.0416	Over-expressed
ST3GAL4	0.45	0.0127	0.0398	Over-expressed
MFSD2B	0.45	0.0114	0.0366	Over-expressed
GPAM	0.45	0.008127	0.028	Over-expressed
RPS26	0.45	0.007746	0.027	Over-expressed
DUSP23	0.45	0.005264	0.02	Over-expressed
FAAH2	0.45	0.003479	0.0145	Over-expressed
IMMP2L	0.45	0.002806	0.0123	Over-expressed
SARS2	0.45	0.001757	0.008567	Over-expressed
RFK	0.45	0.00147	0.00747	Over-expressed
MRPL12	0.45	0.001266	0.006646	Over-expressed
TXNRD2	0.45	0.001238	0.006527	Over-expressed
C12ORF73	0.45	0.001031	0.005654	Over-expressed
SMIM11A	0.45	0.0008686	0.004968	Over-expressed
SHMT1	0.45	0.0007197	0.004282	Over-expressed
COPS9	0.45	0.0005086	0.003261	Over-expressed
GLCE	0.45	0.0005051	0.003241	Over-expressed
NAA20	0.45	0.0004086	0.002769	Over-expressed
NDUFA9	0.45	0.0002644	0.001991	Over-expressed
NENF	0.45	0.0002504	0.001902	Over-expressed
GEMIN6	0.45	0.0001711	0.001434	Over-expressed
MYL6B	0.45	0.0001568	0.001336	Over-expressed
ANAPC15	0.45	0.0001253	0.001131	Over-expressed
PNO1	0.45	7.92e-05	0.0007938	Over-expressed
POLR1D	0.45	5.244e-05	0.0005761	Over-expressed
SEPTIN10	0.45	4.437e-05	0.0005086	Over-expressed
DPH6	0.45	1.916e-05	0.0002729	Over-expressed
DERL2	0.45	6.923e-06	0.0001257	Over-expressed
SNRPE	0.45	5.125e-06	0.0001016	Over-expressed
CNPY2	0.45	2.23e-06	5.639e-05	Over-expressed
NIF3L1	0.45	4.3e-07	1.605e-05	Over-expressed
OBSCN	0.44	0.0421	0.1	Over-expressed
ST6GALNAC4	0.44	0.0227	0.0618	Over-expressed
RPS21	0.44	0.0214	0.059	Over-expressed
RPS18	0.44	0.0171	0.0498	Over-expressed
RPL35	0.44	0.0163	0.0481	Over-expressed
AURKAP1	0.44	0.0159	0.0471	Over-expressed
LSP1P4	0.44	0.0141	0.0432	Over-expressed
C12ORF57	0.44	0.008779	0.0298	Over-expressed
SNHG32	0.44	0.005603	0.021	Over-expressed
EEF1B2	0.44	0.005173	0.0197	Over-expressed
PSMG3	0.44	0.003915	0.0158	Over-expressed
RPL13A	0.44	0.003033	0.013	Over-expressed
BOLA2	0.44	0.002563	0.0115	Over-expressed
FAAP20	0.44	0.002446	0.0111	Over-expressed
BAG1	0.44	0.002314	0.0106	Over-expressed
FAM177A1	0.44	0.001944	0.00929	Over-expressed
MRPS15	0.44	0.0009442	0.005301	Over-expressed
CMTM4	0.44	0.0008123	0.004726	Over-expressed
TATDN1	0.44	0.0004715	0.003076	Over-expressed
SMUG1	0.44	0.000358	0.002497	Over-expressed
ERLIN2	0.44	0.0003524	0.00247	Over-expressed
CRIPT	0.44	0.000109	0.001016	Over-expressed
SLIRP	0.44	9.201e-05	0.000891	Over-expressed
AVEN	0.44	8.538e-05	0.0008423	Over-expressed
MRPL51	0.44	6.392e-05	0.000669	Over-expressed
PCID2	0.44	5.764e-05	0.0006193	Over-expressed
PFDN2	0.44	5.581e-05	0.0006039	Over-expressed
FAM241B	0.44	3.235e-05	0.0004035	Over-expressed
UFC1	0.44	1.877e-05	0.0002679	Over-expressed
NDUFB3	0.44	1.514e-05	0.0002288	Over-expressed
EMC7	0.44	1.145e-05	0.0001861	Over-expressed
NUP35	0.44	7.575e-06	0.0001353	Over-expressed
MRPL45	0.44	3.698e-06	8.085e-05	Over-expressed
DUT	0.44	2.123e-06	5.441e-05	Over-expressed
GTPBP4	0.44	1.908e-06	5.058e-05	Over-expressed
SNAPC5	0.44	7.96e-07	2.589e-05	Over-expressed
MAIP1	0.44	5.68e-08	3.807e-06	Over-expressed
SCO1	0.44	8.36e-11	2.18e-08	Over-expressed
ABCC3	0.43	0.046	0.107	Over-expressed
RDH10	0.43	0.045	0.105	Over-expressed
GPX3	0.43	0.0429	0.102	Over-expressed
HIST2H2BE	0.43	0.0338	0.0845	Over-expressed
CCDC34	0.43	0.0221	0.0606	Over-expressed
BSPRY	0.43	0.0214	0.059	Over-expressed
IDI2-AS1	0.43	0.0212	0.0587	Over-expressed
CYTOR	0.43	0.0208	0.0577	Over-expressed
LINC-PINT	0.43	0.0147	0.0445	Over-expressed
NUDT17	0.43	0.009328	0.0312	Over-expressed
CDK2AP2	0.43	0.009	0.0304	Over-expressed
SLC35G1	0.43	0.008608	0.0293	Over-expressed
PANK1	0.43	0.007989	0.0277	Over-expressed
MARVELD3	0.43	0.007196	0.0255	Over-expressed
ZNF593	0.43	0.006023	0.0222	Over-expressed
TAS2R20	0.43	0.003487	0.0145	Over-expressed
DDTL	0.43	0.002548	0.0114	Over-expressed
LIPT2	0.43	0.002074	0.00976	Over-expressed
RPL7A	0.43	0.001934	0.009256	Over-expressed
CLUH	0.43	0.001335	0.006913	Over-expressed
BOLA1	0.43	0.001306	0.006805	Over-expressed
HINT1	0.43	0.0009985	0.005524	Over-expressed
NUP37	0.43	0.0009969	0.00552	Over-expressed
RPL26L1	0.43	0.0006507	0.003952	Over-expressed
LIN9	0.43	0.0005533	0.003476	Over-expressed
ACADVL	0.43	0.0002896	0.002128	Over-expressed
RPL19	0.43	0.0001943	0.00157	Over-expressed
ASF1A	0.43	0.000189	0.00154	Over-expressed
CCDC51	0.43	0.0001751	0.001461	Over-expressed
RPL6	0.43	0.0001538	0.001314	Over-expressed
MRPL40	0.43	4.274e-05	0.0004957	Over-expressed
PSMA3	0.43	4.227e-05	0.0004915	Over-expressed
AGBL5	0.43	4.168e-05	0.0004867	Over-expressed
MRM3	0.43	3.582e-05	0.000435	Over-expressed
POLR2H	0.43	3.05e-05	0.0003907	Over-expressed
AUP1	0.43	1.151e-05	0.0001865	Over-expressed
COQ9	0.43	1.025e-05	0.0001709	Over-expressed
THAP4	0.43	7.462e-06	0.0001337	Over-expressed
MPV17	0.43	2.751e-06	6.491e-05	Over-expressed
BCCIP	0.43	8.59e-07	2.751e-05	Over-expressed
MTMR2	0.43	6.47e-07	2.178e-05	Over-expressed
NDUFS1	0.43	5.02e-07	1.812e-05	Over-expressed
MRPS16	0.43	2.63e-08	2.199e-06	Over-expressed
DNMT3B	0.42	0.046	0.107	Over-expressed
SNHG7	0.42	0.0231	0.0627	Over-expressed
RHOD	0.42	0.0198	0.0558	Over-expressed
SQOR	0.42	0.0147	0.0445	Over-expressed
LONRF3	0.42	0.0117	0.0371	Over-expressed
TMC4	0.42	0.0111	0.0357	Over-expressed
C12ORF60	0.42	0.009243	0.031	Over-expressed
NOTCH3	0.42	0.008275	0.0284	Over-expressed
RPS8	0.42	0.008241	0.0283	Over-expressed
RPL24	0.42	0.005892	0.0218	Over-expressed
SETD9	0.42	0.005413	0.0204	Over-expressed
IGSF8	0.42	0.005115	0.0195	Over-expressed
SLC44A3	0.42	0.005062	0.0194	Over-expressed
TIMM8B	0.42	0.003269	0.0138	Over-expressed
GCHFR	0.42	0.00281	0.0123	Over-expressed
CCDC167	0.42	0.002701	0.0119	Over-expressed
ANKAR	0.42	0.002655	0.0118	Over-expressed
CASP9	0.42	0.002008	0.009524	Over-expressed
PPP1R14B	0.42	0.001712	0.008397	Over-expressed
TARBP2	0.42	0.001546	0.00777	Over-expressed
PHOSPHO2	0.42	0.0008774	0.005008	Over-expressed
TOMM40	0.42	0.0008438	0.004862	Over-expressed
C3ORF33	0.42	0.0006988	0.004174	Over-expressed
TRMT10A	0.42	0.0006259	0.003828	Over-expressed
LAMTOR5	0.42	0.0004689	0.003066	Over-expressed
TMEM147	0.42	0.0004347	0.002899	Over-expressed
GEMIN7	0.42	0.0003526	0.00247	Over-expressed
LAMTOR2	0.42	0.0003403	0.002402	Over-expressed
SPATS2	0.42	0.000306	0.00222	Over-expressed
UBL7	0.42	0.0001218	0.001104	Over-expressed
TIPIN	0.42	0.0001137	0.00105	Over-expressed
MRPS18B	0.42	9.022e-05	0.0008755	Over-expressed
EIF4A3	0.42	6.496e-05	0.0006774	Over-expressed
BBS4	0.42	6.417e-05	0.0006711	Over-expressed
TRMU	0.42	4.552e-05	0.0005166	Over-expressed
RCN2	0.42	4.01e-05	0.0004726	Over-expressed
TRUB1	0.42	3.538e-05	0.0004311	Over-expressed
COQ6	0.42	2.123e-05	0.0002968	Over-expressed
FBXO22	0.42	1.893e-05	0.0002699	Over-expressed
NSMCE4A	0.42	8.719e-06	0.0001499	Over-expressed
ATF4	0.42	4.279e-06	8.93e-05	Over-expressed
DNTTIP2	0.42	2.444e-06	6.02e-05	Over-expressed
COPZ1	0.42	1.556e-06	4.325e-05	Over-expressed
SLC25A11	0.42	1.189e-06	3.571e-05	Over-expressed
RBM34	0.42	8.22e-07	2.67e-05	Over-expressed
C1ORF131	0.42	6.62e-08	4.294e-06	Over-expressed
FAM24B	0.41	0.0459	0.107	Over-expressed
HSD17B1	0.41	0.032	0.081	Over-expressed
HIST1H2BD	0.41	0.0301	0.0773	Over-expressed
MPP6	0.41	0.024	0.0645	Over-expressed
RPL8	0.41	0.0224	0.0613	Over-expressed
PJVK	0.41	0.0166	0.0486	Over-expressed
ACTR3C	0.41	0.0145	0.044	Over-expressed
C8ORF82	0.41	0.0116	0.037	Over-expressed
AGTRAP	0.41	0.009319	0.0312	Over-expressed
PITPNM2	0.41	0.009241	0.031	Over-expressed
ROMO1	0.41	0.008513	0.0291	Over-expressed
DANCR	0.41	0.006938	0.0248	Over-expressed
ARHGEF16	0.41	0.006412	0.0233	Over-expressed
COX7A2	0.41	0.006283	0.0229	Over-expressed
FGFRL1	0.41	0.005083	0.0194	Over-expressed
DERA	0.41	0.004699	0.0183	Over-expressed
CHKB	0.41	0.003069	0.0131	Over-expressed
MRPL23	0.41	0.002571	0.0115	Over-expressed
B3GNTL1	0.41	0.00226	0.0104	Over-expressed
PDCD2L	0.41	0.002112	0.009903	Over-expressed
BTG1	0.41	0.002073	0.009758	Over-expressed
NDUFB9	0.41	0.001914	0.009174	Over-expressed
TMEM182	0.41	0.001804	0.008743	Over-expressed
LSM2	0.41	0.001766	0.008596	Over-expressed
HDHD3	0.41	0.001688	0.008295	Over-expressed
TOMM6	0.41	0.001048	0.00573	Over-expressed
BORCS5	0.41	0.0009819	0.005463	Over-expressed
TPRKB	0.41	0.0008478	0.00487	Over-expressed
AP1S1	0.41	0.0008221	0.004773	Over-expressed
TARBP1	0.41	0.0007023	0.004189	Over-expressed
MRPL42	0.41	0.0004972	0.003207	Over-expressed
C17ORF75	0.41	0.0004414	0.002929	Over-expressed
COX7A2L	0.41	0.0003699	0.002557	Over-expressed
CHD1L	0.41	0.0003111	0.002251	Over-expressed
PDCD5	0.41	0.0002676	0.002008	Over-expressed
CCT4	0.41	0.0001968	0.001585	Over-expressed
CHCHD1	0.41	0.0001398	0.001224	Over-expressed
TMEM143	0.41	0.0001335	0.001178	Over-expressed
ALG14	0.41	0.0001249	0.001129	Over-expressed
RNF215	0.41	0.0001204	0.001095	Over-expressed
NDUFA8	0.41	3.996e-05	0.0004714	Over-expressed
SRP9	0.41	3.372e-05	0.0004183	Over-expressed
PSMB4	0.41	2.33e-05	0.0003181	Over-expressed
DAP3	0.41	4.441e-06	9.156e-05	Over-expressed
FASTKD1	0.41	4.073e-06	8.67e-05	Over-expressed
PIPSL	0.41	3.689e-06	8.08e-05	Over-expressed
ACP1	0.41	1.42e-07	7.082e-06	Over-expressed
YWHAE	0.41	1.31e-07	6.654e-06	Over-expressed
MRPL44	0.41	1.21e-07	6.353e-06	Over-expressed
PDE1A	0.4	0.046	0.107	Over-expressed
TBC1D2	0.4	0.0435	0.103	Over-expressed
TNFRSF10D	0.4	0.0316	0.08	Over-expressed
SDSL	0.4	0.0209	0.058	Over-expressed
LMO4	0.4	0.0177	0.0512	Over-expressed
RPS10	0.4	0.0155	0.0462	Over-expressed
RPS15A	0.4	0.0153	0.0458	Over-expressed
SH3YL1	0.4	0.008751	0.0297	Over-expressed
NACA2	0.4	0.006939	0.0248	Over-expressed
EXD3	0.4	0.006882	0.0247	Over-expressed
ZC3H12C	0.4	0.006357	0.0231	Over-expressed
GABPB1-AS1	0.4	0.005971	0.022	Over-expressed
POLR2F	0.4	0.005199	0.0198	Over-expressed
COX7B	0.4	0.003088	0.0132	Over-expressed
ATP5ME	0.4	0.00286	0.0124	Over-expressed
PGAM5	0.4	0.002118	0.009918	Over-expressed
PSMG4	0.4	0.001844	0.0089	Over-expressed
MTFP1	0.4	0.001656	0.008183	Over-expressed
CMC1	0.4	0.001567	0.007837	Over-expressed
TMEM208	0.4	0.001458	0.00742	Over-expressed
ANKRD39	0.4	0.001438	0.007339	Over-expressed
POMP	0.4	0.001131	0.006078	Over-expressed
RBCK1	0.4	0.001055	0.005751	Over-expressed
DMAC2L	0.4	0.0009149	0.005174	Over-expressed
MRPS18A	0.4	0.0006647	0.004014	Over-expressed
NIPSNAP1	0.4	0.000514	0.003286	Over-expressed
LETMD1	0.4	0.0004803	0.003116	Over-expressed
C17ORF58	0.4	0.0004778	0.003105	Over-expressed
MEIS3P1	0.4	0.0004597	0.003023	Over-expressed
RPRD1A	0.4	0.0002761	0.002052	Over-expressed
MRPL27	0.4	0.0002752	0.002047	Over-expressed
TNFRSF1A	0.4	0.0002116	0.001672	Over-expressed
INTS10	0.4	0.0002026	0.001618	Over-expressed
MARS2	0.4	0.000174	0.001455	Over-expressed
GPATCH4	0.4	0.0001324	0.001175	Over-expressed
ATP5F1B	0.4	5.517e-05	0.0005994	Over-expressed
DCTN6	0.4	5.405e-05	0.0005904	Over-expressed
RPUSD3	0.4	4.437e-05	0.0005086	Over-expressed
PDF	0.4	4.39e-05	0.0005058	Over-expressed
MRPS5	0.4	1.017e-05	0.0001701	Over-expressed
MTX2	0.4	9.575e-06	0.0001618	Over-expressed
EXOSC1	0.4	6.642e-06	0.0001218	Over-expressed
MMADHC	0.4	4.569e-06	9.351e-05	Over-expressed
NHEJ1	0.4	4.339e-06	9.015e-05	Over-expressed
ENSA	0.4	3.26e-07	1.315e-05	Over-expressed
BCL2L13	0.4	2.71e-07	1.158e-05	Over-expressed
EIF4A1	0.4	9.51e-08	5.463e-06	Over-expressed
GCAT	0.39	0.0374	0.0915	Over-expressed
NUDT8	0.39	0.031	0.079	Over-expressed
CCZ1P-OR7E38P	0.39	0.03	0.0769	Over-expressed
RPL29	0.39	0.0287	0.0743	Over-expressed
HMGA1	0.39	0.0266	0.0701	Over-expressed
HYAL3	0.39	0.0261	0.069	Over-expressed
BLM	0.39	0.0239	0.0643	Over-expressed
ZNF524	0.39	0.0227	0.0618	Over-expressed
DNAJB4	0.39	0.0219	0.0601	Over-expressed
RPL13AP20	0.39	0.0174	0.0505	Over-expressed
SCRN2	0.39	0.0147	0.0445	Over-expressed
GRAMD1C	0.39	0.0124	0.0389	Over-expressed
SDHAF3	0.39	0.0112	0.0361	Over-expressed
ARHGAP8	0.39	0.011	0.0355	Over-expressed
POP7	0.39	0.008928	0.0302	Over-expressed
RPL18	0.39	0.007774	0.0271	Over-expressed
RAB17	0.39	0.007559	0.0265	Over-expressed
EEF1AKMT1	0.39	0.007222	0.0256	Over-expressed
PRPF40B	0.39	0.005707	0.0212	Over-expressed
KCTD1	0.39	0.004867	0.0188	Over-expressed
LRRC23	0.39	0.004671	0.0182	Over-expressed
PCYT2	0.39	0.003242	0.0138	Over-expressed
GNPNAT1	0.39	0.002453	0.0111	Over-expressed
RPS27A	0.39	0.001973	0.009396	Over-expressed
ZNF771	0.39	0.00186	0.00896	Over-expressed
RPP25L	0.39	0.001702	0.008354	Over-expressed
OXSM	0.39	0.0007855	0.004598	Over-expressed
PAWR	0.39	0.0006442	0.003921	Over-expressed
MRPL58	0.39	0.0005366	0.003391	Over-expressed
RNPEP	0.39	0.0005347	0.003387	Over-expressed
NDUFAF4	0.39	0.0004439	0.002942	Over-expressed
RPS19BP1	0.39	0.0003995	0.002718	Over-expressed
SSR2	0.39	0.0003792	0.00261	Over-expressed
DPY30	0.39	0.0002604	0.001967	Over-expressed
AGFG1	0.39	0.0001583	0.001347	Over-expressed
ADSL	0.39	0.0001411	0.001233	Over-expressed
CERS2	0.39	0.0001328	0.001177	Over-expressed
PTRH2	0.39	0.0001275	0.001142	Over-expressed
GPI	0.39	0.000114	0.001051	Over-expressed
BLOC1S2	0.39	9.305e-05	0.0008985	Over-expressed
ECHS1	0.39	8.968e-05	0.0008715	Over-expressed
STK16	0.39	8.704e-05	0.0008531	Over-expressed
ACBD6	0.39	1.2e-05	0.0001928	Over-expressed
VPS72	0.39	5.324e-06	0.0001046	Over-expressed
UCHL5	0.39	2.52e-06	6.105e-05	Over-expressed
NDUFA10	0.39	1.66e-07	7.978e-06	Over-expressed
PHF23	0.39	1.64e-08	1.578e-06	Over-expressed
XRCC6	0.39	1.41e-08	1.416e-06	Over-expressed
SENP3	0.39	1.25e-08	1.311e-06	Over-expressed
OPLAH	0.38	0.0438	0.103	Over-expressed
ARHGAP11A	0.38	0.0386	0.0938	Over-expressed
RPS5	0.38	0.0292	0.0754	Over-expressed
ACOT11	0.38	0.0226	0.0617	Over-expressed
ST20	0.38	0.0209	0.0581	Over-expressed
ACADS	0.38	0.0203	0.0567	Over-expressed
CCDC57	0.38	0.0181	0.0521	Over-expressed
RPS9	0.38	0.0162	0.0479	Over-expressed
FMC1	0.38	0.013	0.0404	Over-expressed
KRT18	0.38	0.0123	0.0388	Over-expressed
CCND3	0.38	0.0105	0.0341	Over-expressed
FBXW5	0.38	0.0104	0.0339	Over-expressed
RPS11	0.38	0.0103	0.0336	Over-expressed
MSH5	0.38	0.00752	0.0264	Over-expressed
CEBPB	0.38	0.00684	0.0245	Over-expressed
RPL5	0.38	0.006787	0.0244	Over-expressed
NOP16	0.38	0.006682	0.0241	Over-expressed
SNRPD2	0.38	0.005756	0.0214	Over-expressed
SNRPGP15	0.38	0.005311	0.0201	Over-expressed
DSTN	0.38	0.005005	0.0192	Over-expressed
CDRT4	0.38	0.004153	0.0166	Over-expressed
ATE1	0.38	0.003517	0.0146	Over-expressed
UQCRHL	0.38	0.002963	0.0128	Over-expressed
GLRX3	0.38	0.002531	0.0114	Over-expressed
PRKAB1	0.38	0.002382	0.0109	Over-expressed
TRAPPC2L	0.38	0.001819	0.008796	Over-expressed
UQCRH	0.38	0.001757	0.008567	Over-expressed
B4GALT1	0.38	0.001745	0.008523	Over-expressed
MRPS35	0.38	0.001685	0.008285	Over-expressed
SIRT7	0.38	0.001584	0.007902	Over-expressed
FAH	0.38	0.001547	0.007773	Over-expressed
NDUFB5	0.38	0.001494	0.007561	Over-expressed
MTRF1	0.38	0.001425	0.00728	Over-expressed
EMC10	0.38	0.001255	0.006606	Over-expressed
PPIB	0.38	0.001154	0.006176	Over-expressed
PPOX	0.38	0.00115	0.006159	Over-expressed
MRPL22	0.38	0.0009358	0.005271	Over-expressed
COX7C	0.38	0.0009326	0.00526	Over-expressed
GLMP	0.38	0.0008635	0.004945	Over-expressed
SLC35E3	0.38	0.0008335	0.00482	Over-expressed
FKBP3	0.38	0.0007738	0.004543	Over-expressed
PDIA3	0.38	0.0007191	0.00428	Over-expressed
LBHD1	0.38	0.0006612	0.003999	Over-expressed
C12ORF10	0.38	0.0006036	0.003717	Over-expressed
ATP8B5P	0.38	0.0005468	0.003444	Over-expressed
DHX32	0.38	0.0005163	0.003298	Over-expressed
ALG3	0.38	0.0004106	0.002778	Over-expressed
MPLKIP	0.38	0.0003982	0.002711	Over-expressed
ATP5F1C	0.38	0.0003828	0.002629	Over-expressed
IAH1	0.38	0.0003827	0.002629	Over-expressed
VAPA	0.38	0.000359	0.002503	Over-expressed
ERLIN1	0.38	0.0003344	0.002373	Over-expressed
COPS5	0.38	0.0002878	0.002119	Over-expressed
PELP1	0.38	0.0002213	0.001728	Over-expressed
TXN2	0.38	0.0001875	0.001531	Over-expressed
UROS	0.38	9.673e-05	0.000925	Over-expressed
TAF1D	0.38	5.259e-05	0.0005764	Over-expressed
RXYLT1	0.38	3.216e-05	0.0004028	Over-expressed
IARS2	0.38	3.63e-07	1.425e-05	Over-expressed
LAMA5	0.37	0.0486	0.112	Over-expressed
NEDD4L	0.37	0.042	0.1	Over-expressed
FAM86B3P	0.37	0.0354	0.0875	Over-expressed
SNHG1	0.37	0.0275	0.0719	Over-expressed
TUBA4A	0.37	0.0267	0.0703	Over-expressed
CD320	0.37	0.0255	0.0677	Over-expressed
CAP2	0.37	0.0251	0.067	Over-expressed
MRPL41	0.37	0.0245	0.0656	Over-expressed
FBXO36	0.37	0.0168	0.0491	Over-expressed
MRPS26	0.37	0.009647	0.0321	Over-expressed
FAM186B	0.37	0.008899	0.0301	Over-expressed
CYCS	0.37	0.008885	0.0301	Over-expressed
DNAH14	0.37	0.007476	0.0263	Over-expressed
PRH1	0.37	0.005945	0.022	Over-expressed
LANCL1	0.37	0.005209	0.0198	Over-expressed
KLHDC4	0.37	0.003903	0.0158	Over-expressed
BRF2	0.37	0.003742	0.0153	Over-expressed
SNRPB	0.37	0.003433	0.0144	Over-expressed
EEF1E1	0.37	0.003244	0.0138	Over-expressed
C6ORF136	0.37	0.003171	0.0135	Over-expressed
TLCD5	0.37	0.003065	0.0131	Over-expressed
MRPL48	0.37	0.003024	0.013	Over-expressed
PINX1	0.37	0.002439	0.011	Over-expressed
ADAL	0.37	0.002393	0.0109	Over-expressed
HAUS4	0.37	0.001448	0.00738	Over-expressed
ZC3H8	0.37	0.001366	0.007044	Over-expressed
PGBD4	0.37	0.001291	0.006741	Over-expressed
UQCRBP1	0.37	0.00129	0.006741	Over-expressed
PHF5A	0.37	0.001166	0.006228	Over-expressed
RBFA	0.37	0.0009822	0.005463	Over-expressed
OLA1	0.37	0.0007947	0.004636	Over-expressed
TMEM107	0.37	0.0007922	0.004629	Over-expressed
TXNDC9	0.37	0.0007235	0.004294	Over-expressed
ZNRF1	0.37	0.0006797	0.004081	Over-expressed
RPL23A	0.37	0.0005732	0.003576	Over-expressed
SAP18	0.37	0.0005461	0.003442	Over-expressed
PTGR2	0.37	0.0003319	0.002361	Over-expressed
DHODH	0.37	0.0002988	0.002179	Over-expressed
COQ8B	0.37	0.000288	0.002119	Over-expressed
WBP1	0.37	0.0002822	0.002084	Over-expressed
GNL3	0.37	0.0002703	0.002019	Over-expressed
ODR4	0.37	0.000233	0.001796	Over-expressed
UQCRB	0.37	0.0002238	0.001744	Over-expressed
MLF2	0.37	0.0001499	0.001295	Over-expressed
C1D	0.37	0.0001311	0.001168	Over-expressed
MTA3	0.37	9.801e-05	0.0009346	Over-expressed
TXNL4A	0.37	8.656e-05	0.0008509	Over-expressed
IMP4	0.37	6.604e-05	0.0006865	Over-expressed
USP5	0.37	5.814e-05	0.0006237	Over-expressed
TUFM	0.37	5.017e-05	0.0005574	Over-expressed
ELP5	0.37	4.706e-05	0.0005301	Over-expressed
DECR1	0.37	3.674e-05	0.000443	Over-expressed
NACA	0.37	3.295e-05	0.0004102	Over-expressed
PA2G4	0.37	3.173e-05	0.0004014	Over-expressed
COPS7A	0.37	1.69e-05	0.0002487	Over-expressed
TIMM17A	0.37	1.118e-05	0.0001828	Over-expressed
MRPL9	0.37	8.47e-06	0.0001467	Over-expressed
GNPAT	0.37	6.463e-06	0.0001203	Over-expressed
DDX59	0.37	2.352e-06	5.894e-05	Over-expressed
PIGC	0.37	1.373e-06	3.936e-05	Over-expressed
FH	0.37	5.77e-07	2.002e-05	Over-expressed
COG2	0.37	4.74e-07	1.74e-05	Over-expressed
DVL2	0.37	2.43e-07	1.05e-05	Over-expressed
ECT2	0.36	0.0416	0.0994	Over-expressed
PYGL	0.36	0.0368	0.0902	Over-expressed
MZT2B	0.36	0.0243	0.0652	Over-expressed
SLC25A10	0.36	0.0208	0.0578	Over-expressed
FLVCR1	0.36	0.0198	0.0557	Over-expressed
OXLD1	0.36	0.0138	0.0423	Over-expressed
RPL27A	0.36	0.0133	0.041	Over-expressed
NUDT14	0.36	0.0126	0.0396	Over-expressed
RPL14	0.36	0.0117	0.0371	Over-expressed
RPL37	0.36	0.0117	0.0373	Over-expressed
MFSD13A	0.36	0.009446	0.0315	Over-expressed
SLC25A16	0.36	0.008536	0.0291	Over-expressed
RRS1	0.36	0.007564	0.0265	Over-expressed
TIGD1	0.36	0.00746	0.0263	Over-expressed
BLOC1S1	0.36	0.007162	0.0254	Over-expressed
SAC3D1	0.36	0.006729	0.0242	Over-expressed
RPL41	0.36	0.005364	0.0203	Over-expressed
GALNS	0.36	0.004605	0.018	Over-expressed
MRPS23	0.36	0.003708	0.0152	Over-expressed
MRS2	0.36	0.003272	0.0138	Over-expressed
TIMM50	0.36	0.003	0.0129	Over-expressed
SURF1	0.36	0.00283	0.0123	Over-expressed
NLN	0.36	0.002784	0.0122	Over-expressed
SLC25A20	0.36	0.002721	0.012	Over-expressed
ATG101	0.36	0.002622	0.0116	Over-expressed
COX17	0.36	0.001533	0.007709	Over-expressed
MRPL38	0.36	0.001309	0.006817	Over-expressed
NOB1	0.36	0.001187	0.006312	Over-expressed
COMMD4	0.36	0.0007655	0.0045	Over-expressed
PSMD11	0.36	0.000538	0.003396	Over-expressed
PYM1	0.36	0.0004452	0.002947	Over-expressed
SPRYD7	0.36	0.000406	0.002753	Over-expressed
GCFC2	0.36	0.0003936	0.002686	Over-expressed
TEFM	0.36	0.0003917	0.002676	Over-expressed
ANAPC16	0.36	0.0003217	0.002306	Over-expressed
TMEM126A	0.36	0.0002847	0.002098	Over-expressed
RAMAC	0.36	0.0002342	0.001802	Over-expressed
GALK2	0.36	0.0002211	0.001728	Over-expressed
PSMB7	0.36	0.0001821	0.001496	Over-expressed
B3GALNT2	0.36	0.00018	0.001488	Over-expressed
IMP3	0.36	0.0001789	0.001483	Over-expressed
SNAPIN	0.36	0.0001471	0.001277	Over-expressed
PRKAG1	0.36	9.317e-05	0.0008985	Over-expressed
UNC50	0.36	6.793e-05	0.0007013	Over-expressed
GPS2	0.36	4.215e-05	0.0004905	Over-expressed
NARS	0.36	2.576e-05	0.0003438	Over-expressed
FXR2	0.36	2.398e-05	0.0003248	Over-expressed
ILF2	0.36	2.143e-05	0.0002991	Over-expressed
FARSB	0.36	1.759e-05	0.0002556	Over-expressed
PSMD7	0.36	9.556e-06	0.0001618	Over-expressed
MRPS9	0.36	3.416e-06	7.615e-05	Over-expressed
DARS	0.36	1.24e-07	6.45e-06	Over-expressed
SCD	0.35	0.0495	0.113	Over-expressed
RPL13P5	0.35	0.0459	0.107	Over-expressed
KHK	0.35	0.0426	0.101	Over-expressed
SERPINI1	0.35	0.0414	0.0991	Over-expressed
CCDC24	0.35	0.0397	0.0957	Over-expressed
DGAT1	0.35	0.035	0.0868	Over-expressed
SPDYA	0.35	0.0273	0.0715	Over-expressed
CBWD6	0.35	0.0256	0.0679	Over-expressed
PRR5	0.35	0.0249	0.0665	Over-expressed
ZRANB3	0.35	0.0172	0.0501	Over-expressed
ACY1	0.35	0.017	0.0494	Over-expressed
LHPP	0.35	0.0169	0.0494	Over-expressed
RPL10A	0.35	0.016	0.0475	Over-expressed
TPT1	0.35	0.014	0.043	Over-expressed
RPS27L	0.35	0.0118	0.0373	Over-expressed
MRPL13	0.35	0.0113	0.0364	Over-expressed
DNAJC10	0.35	0.009943	0.0328	Over-expressed
TBL1X	0.35	0.009184	0.0308	Over-expressed
PSMG1	0.35	0.008615	0.0293	Over-expressed
RPL30	0.35	0.008069	0.0279	Over-expressed
KRT10	0.35	0.00776	0.0271	Over-expressed
NDUFA4	0.35	0.007485	0.0263	Over-expressed
SUCLG2	0.35	0.00547	0.0206	Over-expressed
EPCAM	0.35	0.005381	0.0204	Over-expressed
NDFIP2	0.35	0.005328	0.0202	Over-expressed
COX6B1	0.35	0.005273	0.02	Over-expressed
TIMM17B	0.35	0.005112	0.0195	Over-expressed
RPP21	0.35	0.004571	0.0179	Over-expressed
STRAP	0.35	0.00391	0.0158	Over-expressed
PMVK	0.35	0.003826	0.0156	Over-expressed
PSMB3	0.35	0.003513	0.0146	Over-expressed
MSS51	0.35	0.003486	0.0145	Over-expressed
CMC2	0.35	0.003331	0.014	Over-expressed
CDKN2AIPNL	0.35	0.003156	0.0135	Over-expressed
ACAD10	0.35	0.002795	0.0122	Over-expressed
PFDN6	0.35	0.002617	0.0116	Over-expressed
PPIAL4C	0.35	0.00253	0.0114	Over-expressed
EGLN1	0.35	0.002228	0.0103	Over-expressed
ITPA	0.35	0.002023	0.009574	Over-expressed
SMDT1	0.35	0.001607	0.007986	Over-expressed
SETD6	0.35	0.00144	0.007344	Over-expressed
PTDSS2	0.35	0.001421	0.007266	Over-expressed
VWA8	0.35	0.001371	0.007055	Over-expressed
FAHD2A	0.35	0.0008468	0.004867	Over-expressed
TMEM18	0.35	0.000834	0.00482	Over-expressed
PAICS	0.35	0.0007573	0.00446	Over-expressed
COA4	0.35	0.0007515	0.004434	Over-expressed
CLN6	0.35	0.0006268	0.00383	Over-expressed
TMEM81	0.35	0.000575	0.003579	Over-expressed
CDPF1	0.35	0.0005338	0.003382	Over-expressed
FDPS	0.35	0.000526	0.003344	Over-expressed
DGUOK	0.35	0.0005087	0.003261	Over-expressed
NDUFAB1	0.35	0.0004731	0.003085	Over-expressed
TOM1	0.35	0.0004335	0.002894	Over-expressed
MIPEP	0.35	0.0003697	0.002557	Over-expressed
SUCLG1	0.35	0.0003311	0.002358	Over-expressed
PCCB	0.35	0.0002878	0.002119	Over-expressed
TRAP1	0.35	0.0001949	0.001574	Over-expressed
EIF4B	0.35	9.475e-05	0.0009105	Over-expressed
MDH2	0.35	4.482e-05	0.0005121	Over-expressed
MANBAL	0.35	3.591e-05	0.0004353	Over-expressed
CDC123	0.35	3.376e-05	0.0004183	Over-expressed
TIMM21	0.35	3.174e-05	0.0004014	Over-expressed
ORC2	0.35	2.716e-05	0.0003563	Over-expressed
NIFK	0.35	2.644e-05	0.0003498	Over-expressed
MED9	0.35	1.807e-05	0.0002598	Over-expressed
GMPPA	0.35	9.542e-06	0.0001618	Over-expressed
PPP3R1	0.35	7.69e-06	0.0001359	Over-expressed
MRPL10	0.35	2.628e-06	6.286e-05	Over-expressed
COX10	0.35	1.336e-06	3.861e-05	Over-expressed
TSTA3	0.34	0.0486	0.112	Over-expressed
EXOSC4	0.34	0.0439	0.103	Over-expressed
ZC2HC1C	0.34	0.0399	0.0961	Over-expressed
EPB41L4A-AS1	0.34	0.0382	0.093	Over-expressed
RILP	0.34	0.0347	0.0862	Over-expressed
GAREM1	0.34	0.0279	0.0726	Over-expressed
PUSL1	0.34	0.0263	0.0694	Over-expressed
RFC4	0.34	0.0258	0.0684	Over-expressed
ZNRF3	0.34	0.0236	0.0637	Over-expressed
ENDOG	0.34	0.0217	0.0598	Over-expressed
SPA17	0.34	0.0214	0.0592	Over-expressed
COMT	0.34	0.0202	0.0566	Over-expressed
NUDT12	0.34	0.0192	0.0544	Over-expressed
SLC6A6	0.34	0.0171	0.0498	Over-expressed
SLC7A1	0.34	0.0141	0.0431	Over-expressed
TTLL12	0.34	0.0133	0.0411	Over-expressed
FAM86C2P	0.34	0.0128	0.0399	Over-expressed
RPL38	0.34	0.0122	0.0386	Over-expressed
IFI27L1	0.34	0.011	0.0356	Over-expressed
EIF3E	0.34	0.009691	0.0322	Over-expressed
PYCR1	0.34	0.00955	0.0318	Over-expressed
RNF24	0.34	0.009525	0.0317	Over-expressed
RPS2	0.34	0.009108	0.0306	Over-expressed
EMC9	0.34	0.007863	0.0274	Over-expressed
ITPRID2	0.34	0.007278	0.0257	Over-expressed
TMEM14C	0.34	0.007227	0.0256	Over-expressed
POLE4	0.34	0.006833	0.0245	Over-expressed
SMIM14	0.34	0.006112	0.0224	Over-expressed
C8ORF76	0.34	0.005938	0.0219	Over-expressed
IMPDH2	0.34	0.005889	0.0218	Over-expressed
SLC25A6	0.34	0.004582	0.0179	Over-expressed
STN1	0.34	0.004402	0.0174	Over-expressed
AIMP2	0.34	0.004193	0.0167	Over-expressed
ZDHHC23	0.34	0.004162	0.0166	Over-expressed
ESRRA	0.34	0.004151	0.0166	Over-expressed
MRPL15	0.34	0.003892	0.0158	Over-expressed
DHX34	0.34	0.002723	0.012	Over-expressed
COA5	0.34	0.002674	0.0118	Over-expressed
SLC1A5	0.34	0.002382	0.0109	Over-expressed
PDIA3P1	0.34	0.002164	0.0101	Over-expressed
ITGAE	0.34	0.002162	0.0101	Over-expressed
BPHL	0.34	0.001503	0.007594	Over-expressed
TPI1	0.34	0.001375	0.007074	Over-expressed
UQCRC1	0.34	0.001368	0.007049	Over-expressed
DCAF13	0.34	0.001337	0.00692	Over-expressed
ADH5	0.34	0.001138	0.006109	Over-expressed
MEAK7	0.34	0.001116	0.006023	Over-expressed
C2ORF49	0.34	0.0009765	0.005451	Over-expressed
TATDN3	0.34	0.0009095	0.005154	Over-expressed
MEMO1	0.34	0.0009006	0.005114	Over-expressed
CLK3	0.34	0.0008148	0.004739	Over-expressed
GTF2E2	0.34	0.0007324	0.00434	Over-expressed
ATP5PD	0.34	0.0005982	0.003692	Over-expressed
CDK7	0.34	0.0005825	0.003611	Over-expressed
UBE2M	0.34	0.000456	0.003005	Over-expressed
COA8	0.34	0.0004338	0.002895	Over-expressed
GOLPH3L	0.34	0.000432	0.002888	Over-expressed
SPART	0.34	0.000412	0.002786	Over-expressed
FAM136A	0.34	0.0002187	0.001716	Over-expressed
GATB	0.34	0.0002155	0.001699	Over-expressed
MRPL30	0.34	0.0001538	0.001314	Over-expressed
SNU13	0.34	0.0001507	0.001301	Over-expressed
AAGAB	0.34	0.0001323	0.001174	Over-expressed
ANAPC7	0.34	0.0001214	0.001102	Over-expressed
TMEM11	0.34	0.0001162	0.001067	Over-expressed
MRPL3	0.34	0.0001118	0.001036	Over-expressed
UQCRC2	0.34	3.732e-05	0.0004479	Over-expressed
PDHX	0.34	3.422e-05	0.000421	Over-expressed
GTF2F2	0.34	3.415e-05	0.000421	Over-expressed
MDH1	0.34	2.661e-05	0.0003518	Over-expressed
ASCC1	0.34	2.071e-05	0.000292	Over-expressed
SRP14	0.34	1.087e-05	0.0001788	Over-expressed
TMX2	0.34	2.289e-06	5.757e-05	Over-expressed
SRRM5	0.33	0.0372	0.0911	Over-expressed
ACAT1	0.33	0.034	0.0848	Over-expressed
PFDN4	0.33	0.0213	0.0589	Over-expressed
ACP6	0.33	0.0158	0.047	Over-expressed
BUD31	0.33	0.0154	0.046	Over-expressed
NDUFAF5	0.33	0.0152	0.0455	Over-expressed
PA2G4P4	0.33	0.0145	0.044	Over-expressed
CNIH1	0.33	0.0134	0.0412	Over-expressed
SNX22	0.33	0.0103	0.0337	Over-expressed
ALG5	0.33	0.008352	0.0286	Over-expressed
NDUFAF8	0.33	0.007761	0.0271	Over-expressed
YIPF6	0.33	0.006114	0.0224	Over-expressed
INO80C	0.33	0.005446	0.0205	Over-expressed
RBX1	0.33	0.004232	0.0168	Over-expressed
OGFOD2	0.33	0.003781	0.0155	Over-expressed
RPL3	0.33	0.003736	0.0153	Over-expressed
DPH5	0.33	0.003614	0.0149	Over-expressed
OST4	0.33	0.003059	0.0131	Over-expressed
PITRM1	0.33	0.00221	0.0102	Over-expressed
TRAPPC1	0.33	0.002145	0.009999	Over-expressed
SELENOS	0.33	0.002062	0.009719	Over-expressed
ACTR6	0.33	0.001874	0.009012	Over-expressed
MXI1	0.33	0.001669	0.008235	Over-expressed
MICU2	0.33	0.001655	0.008183	Over-expressed
CCDC85C	0.33	0.00149	0.007548	Over-expressed
NFU1	0.33	0.001469	0.007467	Over-expressed
SWI5	0.33	0.001211	0.006415	Over-expressed
AKT1S1	0.33	0.001205	0.00639	Over-expressed
TMEM183A	0.33	0.001073	0.005831	Over-expressed
ADPRM	0.33	0.001036	0.005682	Over-expressed
WDR73	0.33	0.0009785	0.005455	Over-expressed
TMCO1	0.33	0.0009526	0.005339	Over-expressed
PIGN	0.33	0.0007847	0.004595	Over-expressed
TTC8	0.33	0.0003307	0.002358	Over-expressed
PMPCA	0.33	0.0003214	0.002306	Over-expressed
MTERF4	0.33	0.0002908	0.002134	Over-expressed
PHB	0.33	0.00025	0.001901	Over-expressed
LRPPRC	0.33	0.0001301	0.001161	Over-expressed
PCGF1	0.33	0.0001271	0.001141	Over-expressed
TMEM230	0.33	0.0001077	0.001006	Over-expressed
PSMC1	0.33	9.904e-05	0.0009412	Over-expressed
SCAMP3	0.33	9.881e-05	0.0009403	Over-expressed
TLK1	0.33	3.833e-05	0.0004561	Over-expressed
PRUNE1	0.33	3.218e-05	0.0004028	Over-expressed
NOP58	0.33	2.468e-05	0.0003332	Over-expressed
FASTKD2	0.33	3.774e-06	8.161e-05	Over-expressed
TSG101	0.33	2.936e-06	6.802e-05	Over-expressed
PRELID3A	0.32	0.0496	0.113	Over-expressed
MORN1	0.32	0.049	0.112	Over-expressed
RPS6	0.32	0.0472	0.109	Over-expressed
PPP1R3B	0.32	0.0443	0.104	Over-expressed
NEK3	0.32	0.036	0.0888	Over-expressed
COQ8A	0.32	0.0302	0.0773	Over-expressed
RANGRF	0.32	0.0298	0.0765	Over-expressed
YDJC	0.32	0.0291	0.0752	Over-expressed
NDUFA7	0.32	0.0283	0.0735	Over-expressed
IFT81	0.32	0.0282	0.0732	Over-expressed
PFDN5	0.32	0.0274	0.0718	Over-expressed
ACAT2	0.32	0.0196	0.0553	Over-expressed
RBIS	0.32	0.0182	0.0521	Over-expressed
RPL7	0.32	0.0166	0.0487	Over-expressed
GOT1	0.32	0.0163	0.0481	Over-expressed
PWWP2B	0.32	0.0136	0.0419	Over-expressed
UQCC2	0.32	0.0132	0.0409	Over-expressed
MAGOHB	0.32	0.0131	0.0408	Over-expressed
MRPL52	0.32	0.0122	0.0385	Over-expressed
RPS13	0.32	0.011	0.0356	Over-expressed
HIGD2A	0.32	0.0108	0.0349	Over-expressed
THNSL1	0.32	0.0108	0.0349	Over-expressed
GALE	0.32	0.0102	0.0335	Over-expressed
NUMBL	0.32	0.007017	0.025	Over-expressed
RPAIN	0.32	0.006991	0.025	Over-expressed
SERP1	0.32	0.006128	0.0225	Over-expressed
ZFAND5	0.32	0.006115	0.0224	Over-expressed
PDCD10	0.32	0.00525	0.02	Over-expressed
POLD4	0.32	0.004998	0.0192	Over-expressed
SVBP	0.32	0.004922	0.019	Over-expressed
ANKRD16	0.32	0.004303	0.0171	Over-expressed
ZWILCH	0.32	0.00423	0.0168	Over-expressed
COQ5	0.32	0.003651	0.015	Over-expressed
NCBP3	0.32	0.003581	0.0148	Over-expressed
MRPS30	0.32	0.003455	0.0144	Over-expressed
CASP6	0.32	0.002814	0.0123	Over-expressed
COX8A	0.32	0.002688	0.0119	Over-expressed
SMYD2	0.32	0.00261	0.0116	Over-expressed
SNHG11	0.32	0.002525	0.0113	Over-expressed
SMIM26	0.32	0.002163	0.0101	Over-expressed
G6PC3	0.32	0.00183	0.008844	Over-expressed
COPS2	0.32	0.001719	0.008424	Over-expressed
TRMT10C	0.32	0.001434	0.007326	Over-expressed
BCDIN3D	0.32	0.001275	0.006677	Over-expressed
TAF10	0.32	0.001096	0.005931	Over-expressed
CINP	0.32	0.001029	0.005646	Over-expressed
SCLY	0.32	0.0008119	0.004726	Over-expressed
MITD1	0.32	0.0007773	0.004562	Over-expressed
TMEM179B	0.32	0.0007617	0.00448	Over-expressed
DRG1	0.32	0.0007232	0.004293	Over-expressed
AARSD1	0.32	0.0005123	0.003277	Over-expressed
SF3B6	0.32	0.0004623	0.003033	Over-expressed
RSL1D1	0.32	0.0004223	0.002842	Over-expressed
NADK	0.32	0.0003449	0.002429	Over-expressed
RNF187	0.32	0.0002635	0.001985	Over-expressed
SMAD2	0.32	0.0002211	0.001728	Over-expressed
ADIPOR1	0.32	0.000133	0.001177	Over-expressed
OSBPL9	0.32	0.0001309	0.001166	Over-expressed
MRPS14	0.32	0.0001128	0.001044	Over-expressed
CCT7	0.32	0.0001049	0.0009869	Over-expressed
MTIF2	0.32	8.94e-05	0.00087	Over-expressed
PIP5K1A	0.32	4.797e-05	0.0005377	Over-expressed
ELAC2	0.32	3.348e-05	0.0004161	Over-expressed
ANP32A	0.32	2.078e-05	0.0002927	Over-expressed
EIF3D	0.32	1.567e-05	0.000234	Over-expressed
TCTN3	0.32	2.798e-06	6.566e-05	Over-expressed
MOSPD1	0.31	0.0401	0.0965	Over-expressed
CHCHD2	0.31	0.0355	0.0877	Over-expressed
RFC3	0.31	0.0295	0.0759	Over-expressed
PAXX	0.31	0.0295	0.0761	Over-expressed
SSNA1	0.31	0.0255	0.0678	Over-expressed
SIL1	0.31	0.0246	0.0658	Over-expressed
PLD6	0.31	0.0242	0.0649	Over-expressed
FAM162A	0.31	0.0236	0.0637	Over-expressed
ZNF281	0.31	0.0233	0.0631	Over-expressed
FAAP24	0.31	0.0218	0.06	Over-expressed
MZT1	0.31	0.0207	0.0575	Over-expressed
SEM1	0.31	0.0194	0.0549	Over-expressed
ITPKC	0.31	0.017	0.0495	Over-expressed
ARPC1A	0.31	0.0157	0.0468	Over-expressed
ARV1	0.31	0.0127	0.0396	Over-expressed
BZW2	0.31	0.0127	0.0398	Over-expressed
C1ORF35	0.31	0.0123	0.0388	Over-expressed
TBRG4	0.31	0.0105	0.0342	Over-expressed
COMMD3	0.31	0.009616	0.032	Over-expressed
AMN1	0.31	0.009025	0.0304	Over-expressed
BRIX1	0.31	0.00897	0.0303	Over-expressed
MRPL1	0.31	0.008169	0.0281	Over-expressed
DIABLO	0.31	0.008075	0.0279	Over-expressed
MED31	0.31	0.007747	0.027	Over-expressed
ATP5F1E	0.31	0.007709	0.0269	Over-expressed
ZBTB7B	0.31	0.007103	0.0253	Over-expressed
PTOV1	0.31	0.005636	0.0211	Over-expressed
HIBADH	0.31	0.004643	0.0181	Over-expressed
TRIM37	0.31	0.004006	0.0161	Over-expressed
POMGNT1	0.31	0.003658	0.0151	Over-expressed
MMAB	0.31	0.003263	0.0138	Over-expressed
ETFA	0.31	0.003022	0.013	Over-expressed
MRPS27	0.31	0.002948	0.0127	Over-expressed
UPF3A	0.31	0.002467	0.0111	Over-expressed
OSGEPL1	0.31	0.002346	0.0107	Over-expressed
DTD2	0.31	0.002276	0.0105	Over-expressed
GTF3C5	0.31	0.002239	0.0104	Over-expressed
SFR1	0.31	0.002219	0.0103	Over-expressed
MRPL28	0.31	0.002192	0.0102	Over-expressed
NUTF2	0.31	0.002053	0.009685	Over-expressed
ZNF691	0.31	0.002017	0.009554	Over-expressed
PMPCB	0.31	0.001686	0.008291	Over-expressed
LCMT2	0.31	0.001518	0.007651	Over-expressed
ATF1	0.31	0.001147	0.006146	Over-expressed
MCAT	0.31	0.001013	0.005576	Over-expressed
WDR43	0.31	0.0009063	0.005141	Over-expressed
UFD1	0.31	0.0008251	0.004785	Over-expressed
MRPL16	0.31	0.0006664	0.004021	Over-expressed
EDEM2	0.31	0.0006151	0.003773	Over-expressed
ZNHIT3	0.31	0.000567	0.003545	Over-expressed
MRRF	0.31	0.0005596	0.003509	Over-expressed
TOMM22	0.31	0.0004968	0.003206	Over-expressed
ZC3H15	0.31	0.0004662	0.003054	Over-expressed
POLL	0.31	0.0004296	0.002875	Over-expressed
EMC8	0.31	0.0004004	0.002721	Over-expressed
RPUSD2	0.31	0.0003845	0.002637	Over-expressed
HSPA9	0.31	0.0003726	0.002572	Over-expressed
FAM86C1	0.31	0.0003615	0.002516	Over-expressed
TTC27	0.31	0.000302	0.002196	Over-expressed
PREB	0.31	0.0002799	0.002071	Over-expressed
EIF3J	0.31	0.0002191	0.001718	Over-expressed
TAF9	0.31	0.0001656	0.001395	Over-expressed
SSB	0.31	0.0001621	0.001373	Over-expressed
GGPS1	0.31	9.635e-05	0.0009233	Over-expressed
ALG8	0.31	8.461e-05	0.0008365	Over-expressed
AAMP	0.31	3.67e-05	0.0004428	Over-expressed
PRKRA	0.31	3.404e-05	0.0004204	Over-expressed
TSR1	0.31	2.19e-06	5.57e-05	Over-expressed
RPL23P8	0.3	0.0486	0.112	Over-expressed
RPL32	0.3	0.0417	0.0995	Over-expressed
ZDHHC12	0.3	0.0398	0.0959	Over-expressed
TBC1D7	0.3	0.0376	0.0917	Over-expressed
ALKBH2	0.3	0.0339	0.0846	Over-expressed
INF2	0.3	0.033	0.0829	Over-expressed
NDUFA2	0.3	0.0325	0.082	Over-expressed
MRPL55	0.3	0.0266	0.0702	Over-expressed
NDUFA3	0.3	0.0224	0.0612	Over-expressed
HSPBP1	0.3	0.0218	0.0599	Over-expressed
TRABD	0.3	0.0202	0.0566	Over-expressed
DET1	0.3	0.0193	0.0547	Over-expressed
RPS20	0.3	0.0182	0.0523	Over-expressed
MIA2	0.3	0.0172	0.05	Over-expressed
KCTD9	0.3	0.0165	0.0485	Over-expressed
RPS23	0.3	0.0164	0.0484	Over-expressed
LINC00910	0.3	0.0157	0.0467	Over-expressed
PRDX5	0.3	0.0143	0.0434	Over-expressed
HEBP2	0.3	0.014	0.043	Over-expressed
COQ3	0.3	0.0133	0.0411	Over-expressed
DNAAF2	0.3	0.0132	0.0408	Over-expressed
NHLRC2	0.3	0.011	0.0355	Over-expressed
ALDOA	0.3	0.0108	0.0349	Over-expressed
ATP5PO	0.3	0.0104	0.0339	Over-expressed
PSENEN	0.3	0.009735	0.0323	Over-expressed
MRGBP	0.3	0.008244	0.0283	Over-expressed
ATP9B	0.3	0.007419	0.0262	Over-expressed
PIGV	0.3	0.007056	0.0251	Over-expressed
RAD52	0.3	0.006739	0.0242	Over-expressed
SUMF1	0.3	0.006735	0.0242	Over-expressed
CCT2	0.3	0.006375	0.0232	Over-expressed
MCCC2	0.3	0.006055	0.0223	Over-expressed
PKM	0.3	0.005849	0.0217	Over-expressed
PNPT1	0.3	0.005795	0.0215	Over-expressed
MRTO4	0.3	0.005333	0.0202	Over-expressed
PICK1	0.3	0.005282	0.0201	Over-expressed
CPEB2	0.3	0.005129	0.0196	Over-expressed
JTB	0.3	0.004884	0.0188	Over-expressed
RNASEH1	0.3	0.004711	0.0183	Over-expressed
GPN3	0.3	0.004514	0.0177	Over-expressed
AFMID	0.3	0.003783	0.0155	Over-expressed
MED18	0.3	0.003605	0.0149	Over-expressed
MRPL17	0.3	0.003356	0.0141	Over-expressed
PIGB	0.3	0.002877	0.0125	Over-expressed
NECAP1	0.3	0.002601	0.0116	Over-expressed
NACA4P	0.3	0.002421	0.011	Over-expressed
SIRT5	0.3	0.002238	0.0103	Over-expressed
BPNT1	0.3	0.001884	0.009054	Over-expressed
NCSTN	0.3	0.001771	0.008611	Over-expressed
NDUFB11	0.3	0.001483	0.007522	Over-expressed
ERG28	0.3	0.0008804	0.005021	Over-expressed
PTGES3	0.3	0.0008335	0.00482	Over-expressed
RIOK1	0.3	0.0007313	0.004338	Over-expressed
SPATA5L1	0.3	0.000633	0.003863	Over-expressed
LRRC28	0.3	0.0006192	0.003793	Over-expressed
PES1	0.3	0.000527	0.003345	Over-expressed
ATPAF2	0.3	0.0005156	0.003295	Over-expressed
PRXL2A	0.3	0.0005006	0.003223	Over-expressed
MPPE1	0.3	0.0003385	0.002396	Over-expressed
MED6	0.3	0.0002326	0.001796	Over-expressed
SLC39A1	0.3	0.0002325	0.001796	Over-expressed
RAB10	0.3	0.00022	0.001725	Over-expressed
RNF167	0.3	0.00021	0.001665	Over-expressed
KCMF1	0.3	0.0001793	0.001484	Over-expressed
PSMA1	0.3	0.0001271	0.001141	Over-expressed
EIF2A	0.3	9.659e-05	0.0009245	Over-expressed
PSMD1	0.3	8.811e-05	0.0008615	Over-expressed
DRG2	0.3	8.246e-05	0.0008188	Over-expressed
GLOD4	0.3	2.114e-05	0.000296	Over-expressed
ANAPC11	0.29	0.0456	0.106	Over-expressed
FGGY	0.29	0.04	0.0961	Over-expressed
GRINA	0.29	0.0387	0.094	Over-expressed
MRPL34	0.29	0.0347	0.0861	Over-expressed
ALDH4A1	0.29	0.033	0.0829	Over-expressed
HSPA1B	0.29	0.0313	0.0795	Over-expressed
TMA7	0.29	0.031	0.0789	Over-expressed
SOX12	0.29	0.0276	0.0721	Over-expressed
SNRPF	0.29	0.0253	0.0674	Over-expressed
PERP	0.29	0.025	0.0668	Over-expressed
SAT2	0.29	0.0239	0.0643	Over-expressed
MORC2-AS1	0.29	0.0238	0.0642	Over-expressed
GTPBP6	0.29	0.0237	0.0639	Over-expressed
BCKDHA	0.29	0.0228	0.0619	Over-expressed
MRPS33	0.29	0.0227	0.0618	Over-expressed
CRELD2	0.29	0.0221	0.0605	Over-expressed
SMIM19	0.29	0.0203	0.0567	Over-expressed
CBX8	0.29	0.0202	0.0566	Over-expressed
NHP2	0.29	0.0199	0.056	Over-expressed
CENPL	0.29	0.019	0.054	Over-expressed
CCDC59	0.29	0.0165	0.0485	Over-expressed
KHDC4	0.29	0.016	0.0474	Over-expressed
ATL2	0.29	0.0158	0.0469	Over-expressed
HEXA	0.29	0.015	0.0451	Over-expressed
PYROXD1	0.29	0.015	0.0452	Over-expressed
HSBP1	0.29	0.0144	0.0437	Over-expressed
GAN	0.29	0.0133	0.0411	Over-expressed
DTWD1	0.29	0.0132	0.041	Over-expressed
FBXO25	0.29	0.013	0.0405	Over-expressed
MRPL2	0.29	0.0121	0.0382	Over-expressed
SNRPD1	0.29	0.0117	0.0373	Over-expressed
BORCS7	0.29	0.0116	0.0369	Over-expressed
PRMT1	0.29	0.0116	0.0371	Over-expressed
PPIL1	0.29	0.011	0.0357	Over-expressed
ACADM	0.29	0.009843	0.0325	Over-expressed
VARS2	0.29	0.009407	0.0314	Over-expressed
C1RL	0.29	0.00935	0.0312	Over-expressed
PCGF5	0.29	0.009187	0.0308	Over-expressed
JMJD4	0.29	0.009076	0.0305	Over-expressed
PSMC6	0.29	0.008414	0.0288	Over-expressed
SEC61B	0.29	0.007509	0.0264	Over-expressed
SLC5A6	0.29	0.006089	0.0224	Over-expressed
EIF3H	0.29	0.005792	0.0215	Over-expressed
CBX3	0.29	0.00459	0.0179	Over-expressed
NUTM2A-AS1	0.29	0.004347	0.0172	Over-expressed
MRPS7	0.29	0.00329	0.0139	Over-expressed
MAK16	0.29	0.003194	0.0136	Over-expressed
TRAF7	0.29	0.003128	0.0133	Over-expressed
MRPL47	0.29	0.002905	0.0126	Over-expressed
PTGES2	0.29	0.002703	0.0119	Over-expressed
NOP56	0.29	0.002513	0.0113	Over-expressed
NDUFC1	0.29	0.00246	0.0111	Over-expressed
ARFIP2	0.29	0.001891	0.009081	Over-expressed
DNAJC19	0.29	0.001645	0.008141	Over-expressed
EDC3	0.29	0.001612	0.008005	Over-expressed
RNASEK	0.29	0.001407	0.007215	Over-expressed
GPD2	0.29	0.001398	0.007179	Over-expressed
TMEM189	0.29	0.001352	0.006989	Over-expressed
RTKN	0.29	0.001054	0.005748	Over-expressed
EIF3L	0.29	0.00105	0.00574	Over-expressed
TMEM33	0.29	0.0008803	0.005021	Over-expressed
TNPO1	0.29	0.0008173	0.004751	Over-expressed
DLD	0.29	0.0005896	0.003647	Over-expressed
RPP38	0.29	0.0005193	0.003312	Over-expressed
CNOT7	0.29	0.0004628	0.003035	Over-expressed
WDR75	0.29	0.00042	0.002827	Over-expressed
B4GALT3	0.29	0.0004183	0.00282	Over-expressed
OCIAD1	0.29	0.0003112	0.002251	Over-expressed
CHUK	0.29	0.0002672	0.002006	Over-expressed
PCBP2	0.29	0.000246	0.001877	Over-expressed
STAMBP	0.29	0.0002091	0.00166	Over-expressed
UBE2G1	0.29	7.385e-06	0.0001331	Over-expressed
NSMF	0.28	0.0499	0.114	Over-expressed
DNAAF4	0.28	0.0493	0.113	Over-expressed
PACC1	0.28	0.0474	0.11	Over-expressed
NPEPL1	0.28	0.0454	0.106	Over-expressed
NUDT16P1	0.28	0.0444	0.104	Over-expressed
NAA10	0.28	0.0437	0.103	Over-expressed
FAM86HP	0.28	0.0384	0.0933	Over-expressed
PRELID3B	0.28	0.0356	0.0879	Over-expressed
CDK8	0.28	0.0336	0.084	Over-expressed
CMSS1	0.28	0.0329	0.0827	Over-expressed
SPRN	0.28	0.0304	0.0778	Over-expressed
ZNF581	0.28	0.0279	0.0726	Over-expressed
LINC00339	0.28	0.0229	0.0621	Over-expressed
RNPEPL1	0.28	0.0206	0.0574	Over-expressed
FUT10	0.28	0.0195	0.0549	Over-expressed
POLR2J	0.28	0.0179	0.0516	Over-expressed
SLC38A6	0.28	0.0176	0.0509	Over-expressed
SELENOH	0.28	0.0167	0.049	Over-expressed
EIF3K	0.28	0.0162	0.048	Over-expressed
ATP5MG	0.28	0.0149	0.0448	Over-expressed
DHTKD1	0.28	0.014	0.0428	Over-expressed
RIDA	0.28	0.0136	0.0417	Over-expressed
TMED2	0.28	0.0132	0.0409	Over-expressed
MRPS24	0.28	0.0127	0.0397	Over-expressed
CXXC1	0.28	0.0121	0.0381	Over-expressed
ING5	0.28	0.012	0.038	Over-expressed
NFKBIB	0.28	0.0118	0.0375	Over-expressed
NT5C3B	0.28	0.0112	0.0362	Over-expressed
EEF1G	0.28	0.0103	0.0337	Over-expressed
APOO	0.28	0.009731	0.0323	Over-expressed
CEP76	0.28	0.009058	0.0305	Over-expressed
INTS7	0.28	0.00857	0.0292	Over-expressed
CISD1	0.28	0.008177	0.0281	Over-expressed
ZFYVE19	0.28	0.007005	0.025	Over-expressed
COX6C	0.28	0.00671	0.0242	Over-expressed
UQCRFS1	0.28	0.006541	0.0237	Over-expressed
CHORDC1	0.28	0.006331	0.0231	Over-expressed
CCT5	0.28	0.005647	0.0211	Over-expressed
NABP2	0.28	0.005393	0.0204	Over-expressed
ERH	0.28	0.004938	0.019	Over-expressed
SCNM1	0.28	0.004855	0.0188	Over-expressed
PSMD9	0.28	0.00482	0.0187	Over-expressed
NDUFA6	0.28	0.004606	0.018	Over-expressed
ERCC1	0.28	0.004502	0.0177	Over-expressed
TSFM	0.28	0.00448	0.0176	Over-expressed
ORC5	0.28	0.004143	0.0166	Over-expressed
OARD1	0.28	0.003897	0.0158	Over-expressed
USP40	0.28	0.003854	0.0157	Over-expressed
POLG2	0.28	0.003342	0.0141	Over-expressed
CIAO2A	0.28	0.00333	0.014	Over-expressed
STX8	0.28	0.003106	0.0133	Over-expressed
C1ORF74	0.28	0.003017	0.013	Over-expressed
TMCO6	0.28	0.002812	0.0123	Over-expressed
CLN3	0.28	0.002483	0.0112	Over-expressed
RABEPK	0.28	0.002385	0.0109	Over-expressed
WDR74	0.28	0.002191	0.0102	Over-expressed
MRPL18	0.28	0.002155	0.01	Over-expressed
RNF25	0.28	0.001684	0.008285	Over-expressed
MOB4	0.28	0.00156	0.007817	Over-expressed
PDHB	0.28	0.001326	0.006882	Over-expressed
AAAS	0.28	0.001322	0.006867	Over-expressed
TARS2	0.28	0.001267	0.006649	Over-expressed
TACO1	0.28	0.001057	0.005757	Over-expressed
PRMT5	0.28	0.0009827	0.005463	Over-expressed
MIS12	0.28	0.0007399	0.004372	Over-expressed
DDX28	0.28	0.00064	0.003897	Over-expressed
GOT2	0.28	0.0005419	0.003418	Over-expressed
POLDIP2	0.28	0.00046	0.003023	Over-expressed
TFG	0.28	0.0004187	0.002821	Over-expressed
KLHL12	0.28	0.0004092	0.002771	Over-expressed
NCKAP1	0.28	0.0003074	0.002227	Over-expressed
NGRN	0.28	0.000221	0.001728	Over-expressed
FAM160B1	0.28	0.0001638	0.001384	Over-expressed
RPP30	0.28	5.787e-05	0.0006213	Over-expressed
PTCD3	0.28	3.218e-05	0.0004028	Over-expressed
ATAD1	0.28	4.541e-06	9.322e-05	Over-expressed
SLC2A4RG	0.27	0.0494	0.113	Over-expressed
LINC00205	0.27	0.0466	0.108	Over-expressed
TEX30	0.27	0.0461	0.107	Over-expressed
MRPL21	0.27	0.0445	0.105	Over-expressed
DHRS11	0.27	0.0442	0.104	Over-expressed
MTFR1	0.27	0.0435	0.103	Over-expressed
ZNF511	0.27	0.0429	0.102	Over-expressed
DDRGK1	0.27	0.0409	0.0981	Over-expressed
IDI1	0.27	0.0408	0.0978	Over-expressed
TDG	0.27	0.0388	0.0941	Over-expressed
GALNT2	0.27	0.0374	0.0914	Over-expressed
GSKIP	0.27	0.0313	0.0795	Over-expressed
C12ORF45	0.27	0.0303	0.0777	Over-expressed
DDHD2	0.27	0.0277	0.0723	Over-expressed
FPGS	0.27	0.0263	0.0695	Over-expressed
MYBBP1A	0.27	0.0237	0.064	Over-expressed
ULK1	0.27	0.0223	0.061	Over-expressed
NLE1	0.27	0.0221	0.0605	Over-expressed
ATP5PF	0.27	0.0178	0.0513	Over-expressed
MRPS34	0.27	0.0172	0.05	Over-expressed
DHRS4L2	0.27	0.0168	0.0491	Over-expressed
NAXD	0.27	0.0167	0.0488	Over-expressed
ZMAT5	0.27	0.0165	0.0485	Over-expressed
GON7	0.27	0.0165	0.0485	Over-expressed
RPL23AP7	0.27	0.0146	0.0443	Over-expressed
PSMA7	0.27	0.0142	0.0434	Over-expressed
TRIAP1	0.27	0.0131	0.0408	Over-expressed
USE1	0.27	0.0129	0.0402	Over-expressed
ACTR1B	0.27	0.007643	0.0267	Over-expressed
DESI2	0.27	0.007062	0.0252	Over-expressed
ZSCAN2	0.27	0.007002	0.025	Over-expressed
PUS7	0.27	0.006462	0.0234	Over-expressed
TBCA	0.27	0.005342	0.0202	Over-expressed
TMEM177	0.27	0.005331	0.0202	Over-expressed
ERLEC1	0.27	0.004814	0.0186	Over-expressed
MCUR1	0.27	0.004524	0.0178	Over-expressed
NUDCD2	0.27	0.003821	0.0156	Over-expressed
CDAN1	0.27	0.003572	0.0148	Over-expressed
SDF2	0.27	0.003398	0.0143	Over-expressed
TADA1	0.27	0.003123	0.0133	Over-expressed
SUCLA2	0.27	0.002567	0.0115	Over-expressed
MSANTD3	0.27	0.002409	0.0109	Over-expressed
ACBD5	0.27	0.001761	0.008579	Over-expressed
MAPKAPK5	0.27	0.001577	0.007873	Over-expressed
FRA10AC1	0.27	0.001237	0.006524	Over-expressed
NOL7	0.27	0.001236	0.006524	Over-expressed
EEF1AKMT2	0.27	0.001171	0.006246	Over-expressed
SLC25A17	0.27	0.001126	0.006061	Over-expressed
TRMT61B	0.27	0.001121	0.006037	Over-expressed
GEMIN4	0.27	0.0009944	0.005508	Over-expressed
RNF115	0.27	0.0009776	0.005453	Over-expressed
TFAM	0.27	0.0009302	0.00525	Over-expressed
ESD	0.27	0.0007843	0.004595	Over-expressed
DNAJA3	0.27	0.0006724	0.004046	Over-expressed
GABARAPL2	0.27	0.0006519	0.003958	Over-expressed
SF3B4	0.27	0.0006278	0.003835	Over-expressed
SETDB1	0.27	0.0005671	0.003545	Over-expressed
VPS33B	0.27	0.0005233	0.00333	Over-expressed
ATXN10	0.27	0.0004601	0.003023	Over-expressed
TMEM69	0.27	0.0003463	0.002435	Over-expressed
TIMM22	0.27	0.0002369	0.001819	Over-expressed
STK25	0.27	0.0001639	0.001384	Over-expressed
ATP6V1E1	0.27	0.0001321	0.001174	Over-expressed
DDX1	0.27	0.0001265	0.001139	Over-expressed
ST13	0.27	0.0001182	0.001082	Over-expressed
SMNDC1	0.27	4.919e-05	0.0005496	Over-expressed
CDC73	0.27	2.259e-05	0.0003106	Over-expressed
2019-03-05	0.27	5.777e-06	0.0001114	Over-expressed
JUP	0.26	0.0488	0.112	Over-expressed
RPLP2	0.26	0.047	0.109	Over-expressed
ZBED6CL	0.26	0.0457	0.107	Over-expressed
ITGB1	0.26	0.0419	0.0998	Over-expressed
AEN	0.26	0.0394	0.0952	Over-expressed
DDX39A	0.26	0.0394	0.0953	Over-expressed
SETD4	0.26	0.0385	0.0935	Over-expressed
TRAF4	0.26	0.0378	0.0923	Over-expressed
PPIAL4G	0.26	0.0363	0.0895	Over-expressed
DHRS7B	0.26	0.0339	0.0847	Over-expressed
XRCC3	0.26	0.0335	0.0838	Over-expressed
RPS12	0.26	0.0321	0.0811	Over-expressed
MSRB2	0.26	0.0318	0.0805	Over-expressed
PDRG1	0.26	0.0303	0.0776	Over-expressed
SLC39A6	0.26	0.0297	0.0765	Over-expressed
NOP53	0.26	0.0286	0.0742	Over-expressed
RPL11	0.26	0.0264	0.0698	Over-expressed
BNIP1	0.26	0.0255	0.0678	Over-expressed
RUVBL2	0.26	0.0254	0.0675	Over-expressed
FAM86EP	0.26	0.0252	0.0671	Over-expressed
TMEM126B	0.26	0.0202	0.0566	Over-expressed
FUCA2	0.26	0.0194	0.0549	Over-expressed
INTS13	0.26	0.0189	0.0538	Over-expressed
PXMP2	0.26	0.0189	0.0538	Over-expressed
RDX	0.26	0.0188	0.0536	Over-expressed
PPA2	0.26	0.0186	0.0532	Over-expressed
TMEM59	0.26	0.0169	0.0494	Over-expressed
RICTOR	0.26	0.0166	0.0486	Over-expressed
CISD3	0.26	0.0164	0.0483	Over-expressed
FNTA	0.26	0.0147	0.0445	Over-expressed
THOC5	0.26	0.0135	0.0415	Over-expressed
PPIA	0.26	0.0133	0.0412	Over-expressed
TIMM9	0.26	0.0131	0.0408	Over-expressed
SERHL	0.26	0.0125	0.0393	Over-expressed
PUF60	0.26	0.012	0.038	Over-expressed
UGGT1	0.26	0.0112	0.0361	Over-expressed
NDUFB10	0.26	0.0107	0.0347	Over-expressed
MPHOSPH6	0.26	0.0107	0.0347	Over-expressed
TRPT1	0.26	0.009449	0.0315	Over-expressed
MYPOP	0.26	0.008092	0.0279	Over-expressed
GTF3C3	0.26	0.007824	0.0272	Over-expressed
TMEM41B	0.26	0.007597	0.0266	Over-expressed
FDX1	0.26	0.007525	0.0264	Over-expressed
SSBP1	0.26	0.007268	0.0257	Over-expressed
COA7	0.26	0.00718	0.0255	Over-expressed
PEX5	0.26	0.006144	0.0225	Over-expressed
MRPS2	0.26	0.005657	0.0211	Over-expressed
CSE1L	0.26	0.005555	0.0209	Over-expressed
DCAF8	0.26	0.005151	0.0196	Over-expressed
MCRS1	0.26	0.004666	0.0182	Over-expressed
DDX55	0.26	0.0045	0.0177	Over-expressed
PDCD2	0.26	0.004477	0.0176	Over-expressed
SPCS1	0.26	0.004254	0.0169	Over-expressed
IPO5	0.26	0.004221	0.0168	Over-expressed
PDIA6	0.26	0.004087	0.0164	Over-expressed
SIAH2	0.26	0.004007	0.0161	Over-expressed
SEC11A	0.26	0.003607	0.0149	Over-expressed
CLNS1A	0.26	0.003481	0.0145	Over-expressed
ILKAP	0.26	0.003473	0.0145	Over-expressed
ANAPC5	0.26	0.003329	0.014	Over-expressed
ZBTB8OS	0.26	0.003222	0.0137	Over-expressed
PDCL3	0.26	0.002875	0.0125	Over-expressed
C2ORF68	0.26	0.002443	0.0111	Over-expressed
PIGU	0.26	0.002403	0.0109	Over-expressed
CDK5RAP1	0.26	0.002169	0.0101	Over-expressed
UBE2V2	0.26	0.002138	0.009983	Over-expressed
CTBP2	0.26	0.001975	0.009403	Over-expressed
COPS3	0.26	0.001844	0.0089	Over-expressed
METAP1	0.26	0.001508	0.007609	Over-expressed
DMAC2	0.26	0.001457	0.007418	Over-expressed
SOCS6	0.26	0.001353	0.006992	Over-expressed
CPSF3	0.26	0.0004757	0.003096	Over-expressed
CHTOP	0.26	9.419e-05	0.0009058	Over-expressed
TUBA1C	0.25	0.0494	0.113	Over-expressed
PDSS1	0.25	0.0486	0.112	Over-expressed
NSMCE2	0.25	0.0483	0.111	Over-expressed
XBP1	0.25	0.0446	0.105	Over-expressed
RRP7A	0.25	0.0425	0.101	Over-expressed
REEP3	0.25	0.0404	0.0969	Over-expressed
NMRK1	0.25	0.0388	0.094	Over-expressed
ECH1	0.25	0.0385	0.0935	Over-expressed
SUV39H2	0.25	0.038	0.0926	Over-expressed
ATP5IF1	0.25	0.0336	0.0842	Over-expressed
C11ORF54	0.25	0.0315	0.0799	Over-expressed
COX14	0.25	0.0297	0.0764	Over-expressed
SARNP	0.25	0.0277	0.0723	Over-expressed
CLBA1	0.25	0.0271	0.071	Over-expressed
DNAJC1	0.25	0.0261	0.0691	Over-expressed
ZMYND19	0.25	0.0254	0.0676	Over-expressed
ZSWIM7	0.25	0.0247	0.0661	Over-expressed
STOML2	0.25	0.0231	0.0626	Over-expressed
IFT88	0.25	0.0229	0.0623	Over-expressed
UQCR10	0.25	0.0227	0.0618	Over-expressed
IBA57	0.25	0.0218	0.0599	Over-expressed
TMEM219	0.25	0.0214	0.059	Over-expressed
POLR2K	0.25	0.0206	0.0574	Over-expressed
CLASRP	0.25	0.0204	0.0569	Over-expressed
VARS	0.25	0.0191	0.0542	Over-expressed
TSEN15	0.25	0.0167	0.0488	Over-expressed
RPE	0.25	0.0165	0.0484	Over-expressed
BFAR	0.25	0.0165	0.0485	Over-expressed
RRP12	0.25	0.0163	0.0482	Over-expressed
ZNF576	0.25	0.0155	0.0463	Over-expressed
C18ORF21	0.25	0.0153	0.0457	Over-expressed
POLM	0.25	0.0153	0.0458	Over-expressed
COMMD6	0.25	0.0148	0.0445	Over-expressed
UBE2MP1	0.25	0.013	0.0405	Over-expressed
TUBGCP5	0.25	0.0129	0.0401	Over-expressed
NUDT19	0.25	0.0128	0.0398	Over-expressed
NELFE	0.25	0.0127	0.0398	Over-expressed
UBA2	0.25	0.012	0.038	Over-expressed
PPP5C	0.25	0.0111	0.0357	Over-expressed
BABAM2	0.25	0.011	0.0355	Over-expressed
VAPB	0.25	0.0104	0.034	Over-expressed
PSMD8	0.25	0.00858	0.0292	Over-expressed
SNF8	0.25	0.007954	0.0276	Over-expressed
BUD23	0.25	0.007556	0.0265	Over-expressed
MTERF1	0.25	0.007119	0.0253	Over-expressed
QDPR	0.25	0.006997	0.025	Over-expressed
GABARAP	0.25	0.006718	0.0242	Over-expressed
ANKZF1	0.25	0.006097	0.0224	Over-expressed
RABL3	0.25	0.005684	0.0212	Over-expressed
ZBTB41	0.25	0.004865	0.0188	Over-expressed
LLPH	0.25	0.004399	0.0174	Over-expressed
CARS2	0.25	0.004106	0.0165	Over-expressed
LETM1	0.25	0.003616	0.0149	Over-expressed
ZFAND6	0.25	0.003435	0.0144	Over-expressed
DUSP28	0.25	0.00324	0.0138	Over-expressed
EIF2AK4	0.25	0.002947	0.0127	Over-expressed
NDUFS3	0.25	0.002919	0.0126	Over-expressed
FAM204A	0.25	0.002855	0.0124	Over-expressed
GRPEL1	0.25	0.00263	0.0117	Over-expressed
TANK	0.25	0.002569	0.0115	Over-expressed
ZNF384	0.25	0.002425	0.011	Over-expressed
COASY	0.25	0.002338	0.0107	Over-expressed
NPTN	0.25	0.002291	0.0105	Over-expressed
UBAC2	0.25	0.002081	0.009785	Over-expressed
UBQLN4	0.25	0.001808	0.008759	Over-expressed
DCTN2	0.25	0.001744	0.008519	Over-expressed
MRPS31	0.25	0.001213	0.006421	Over-expressed
ST13P4	0.25	0.0009886	0.005487	Over-expressed
MRPL19	0.25	0.0008564	0.004914	Over-expressed
HNRNPC	0.25	0.0008224	0.004773	Over-expressed
ARF1	0.25	0.0007984	0.004655	Over-expressed
DUSP12	0.25	0.0006815	0.00409	Over-expressed
FAM45A	0.25	0.000181	0.001492	Over-expressed
SUPV3L1	0.25	2.987e-05	0.0003836	Over-expressed
PCBP1	0.25	4.316e-06	8.98e-05	Over-expressed
OSER1	0.24	0.0489	0.112	Over-expressed
PDCL3P4	0.24	0.0468	0.109	Over-expressed
MAN2C1	0.24	0.0449	0.105	Over-expressed
ARRDC1-AS1	0.24	0.0447	0.105	Over-expressed
CCDC12	0.24	0.0444	0.104	Over-expressed
SWT1	0.24	0.0437	0.103	Over-expressed
RAB4B	0.24	0.0425	0.101	Over-expressed
H3F3A	0.24	0.0401	0.0965	Over-expressed
CREM	0.24	0.0392	0.0948	Over-expressed
NIPSNAP2	0.24	0.038	0.0927	Over-expressed
NDUFA12	0.24	0.0358	0.0885	Over-expressed
PIGT	0.24	0.0344	0.0857	Over-expressed
PROSER1	0.24	0.0313	0.0795	Over-expressed
ACTR3B	0.24	0.0309	0.0788	Over-expressed
COG6	0.24	0.0267	0.0703	Over-expressed
COX18	0.24	0.0242	0.065	Over-expressed
PCBD2	0.24	0.024	0.0646	Over-expressed
CMAS	0.24	0.0237	0.064	Over-expressed
GTPBP8	0.24	0.0228	0.0621	Over-expressed
AUH	0.24	0.0225	0.0614	Over-expressed
HMGB1	0.24	0.0216	0.0596	Over-expressed
PPCS	0.24	0.0215	0.0592	Over-expressed
BANF1	0.24	0.021	0.0582	Over-expressed
ORC4	0.24	0.0198	0.0558	Over-expressed
RNF170	0.24	0.0179	0.0516	Over-expressed
ASH2L	0.24	0.0173	0.0501	Over-expressed
TFB1M	0.24	0.0153	0.0458	Over-expressed
MGST2	0.24	0.0147	0.0445	Over-expressed
MORN2	0.24	0.0145	0.044	Over-expressed
METTL16	0.24	0.0117	0.0372	Over-expressed
SLC35C2	0.24	0.0116	0.037	Over-expressed
TMEM41A	0.24	0.0103	0.0338	Over-expressed
EBNA1BP2	0.24	0.0103	0.0338	Over-expressed
PWP1	0.24	0.009741	0.0323	Over-expressed
ENTR1	0.24	0.009212	0.0309	Over-expressed
SDHB	0.24	0.009061	0.0305	Over-expressed
UAP1	0.24	0.008792	0.0298	Over-expressed
DDX56	0.24	0.008788	0.0298	Over-expressed
UBE2F	0.24	0.008227	0.0283	Over-expressed
TIMMDC1	0.24	0.006597	0.0238	Over-expressed
NDUFAF7	0.24	0.006141	0.0225	Over-expressed
SLC25A3	0.24	0.005879	0.0218	Over-expressed
ATP6V1G1	0.24	0.005693	0.0212	Over-expressed
WRAP53	0.24	0.005595	0.0209	Over-expressed
LAMTOR1	0.24	0.004808	0.0186	Over-expressed
JKAMP	0.24	0.004154	0.0166	Over-expressed
EXOSC2	0.24	0.003826	0.0156	Over-expressed
CLPX	0.24	0.003191	0.0136	Over-expressed
KRR1	0.24	0.002963	0.0128	Over-expressed
KMT5A	0.24	0.002566	0.0115	Over-expressed
TXNL4B	0.24	0.00245	0.0111	Over-expressed
COPS8	0.24	0.001997	0.009484	Over-expressed
SUMO1	0.24	0.001249	0.006579	Over-expressed
YIPF4	0.24	0.00112	0.006037	Over-expressed
SEPTIN2	0.24	0.0009884	0.005487	Over-expressed
RMDN1	0.24	0.0008547	0.004907	Over-expressed
COP1	0.24	0.0003512	0.002465	Over-expressed
SHLD2P1	0.24	0.0002997	0.002182	Over-expressed
ANXA7	0.24	0.0002612	0.001972	Over-expressed
ERCC3	0.24	0.000236	0.001814	Over-expressed
HADHB	0.24	4.062e-05	0.000478	Over-expressed
MRPL32	0.23	0.0498	0.114	Over-expressed
ARIH2OS	0.23	0.0477	0.11	Over-expressed
USP43	0.23	0.0475	0.11	Over-expressed
DDX54	0.23	0.0475	0.11	Over-expressed
MRPS10	0.23	0.0474	0.11	Over-expressed
SLC25A39	0.23	0.0471	0.109	Over-expressed
NXT2	0.23	0.047	0.109	Over-expressed
TANC1	0.23	0.0437	0.103	Over-expressed
TIMM10	0.23	0.0413	0.0987	Over-expressed
DDX47	0.23	0.0396	0.0956	Over-expressed
ZNF76	0.23	0.0393	0.0951	Over-expressed
DTNB	0.23	0.0372	0.091	Over-expressed
DUS4L	0.23	0.0366	0.09	Over-expressed
PTER	0.23	0.0364	0.0896	Over-expressed
NCBP2AS2	0.23	0.0353	0.0875	Over-expressed
POLR1C	0.23	0.0345	0.0857	Over-expressed
IDE	0.23	0.0334	0.0837	Over-expressed
KAT2A	0.23	0.0309	0.0788	Over-expressed
SPPL2A	0.23	0.0295	0.076	Over-expressed
RSRC1	0.23	0.0284	0.0736	Over-expressed
RPS25	0.23	0.0274	0.0717	Over-expressed
METTL8	0.23	0.0269	0.0707	Over-expressed
PSMA5	0.23	0.0256	0.0681	Over-expressed
NDUFAF1	0.23	0.0229	0.0621	Over-expressed
WDSUB1	0.23	0.0213	0.0588	Over-expressed
ACTL6A	0.23	0.0196	0.0552	Over-expressed
RTN4IP1	0.23	0.0194	0.0549	Over-expressed
DDX52	0.23	0.0189	0.0538	Over-expressed
VPS36	0.23	0.0171	0.0497	Over-expressed
CHMP5	0.23	0.0165	0.0484	Over-expressed
DNAJC17	0.23	0.0164	0.0484	Over-expressed
RPAP2	0.23	0.0154	0.046	Over-expressed
NIP7	0.23	0.0152	0.0456	Over-expressed
TMEM258	0.23	0.0151	0.0453	Over-expressed
MTIF3	0.23	0.0146	0.0441	Over-expressed
TRMT1L	0.23	0.0142	0.0433	Over-expressed
EBAG9	0.23	0.0135	0.0417	Over-expressed
MRPS22	0.23	0.0134	0.0412	Over-expressed
SNRPC	0.23	0.0128	0.04	Over-expressed
RTRAF	0.23	0.0102	0.0335	Over-expressed
URB2	0.23	0.0101	0.0334	Over-expressed
ZCRB1	0.23	0.009237	0.0309	Over-expressed
CHMP2A	0.23	0.008939	0.0302	Over-expressed
[truncated: 4,028 more rows]
