# Supplementary material for: Integrated data analysis reveals significant associations of KEAP1 mutations with DNA methylation alterations in lung adenocarcinomas
Source: Aging (Albany NY). 2020 Apr 23;12(8):7183–206. doi: 10.18632/aging.103068 (PMC7202502; doi:10.18632/aging.103068)
Supplement: Supplementary File 7 [file aging-12-103068-s003..xlsx]

## Sheet: Sheet1
overlapping genes between differentially methylated and differentially expressed genes
probe	gene	delta_beta	log_FC	Chromosome	Start	End	Gene_Symbol	Gene_Type	Transcript_ID	Position_to_TSS	CGI_Coordinate	Feature_Type
cg19648686	AKR1C2	-0.333994	6.54	chr10	5002800	5002801	AKR1C1;AKR1C2;AKR1C2;AKR1C2;AKR1C2;AKR1C2;AKR1C2;AKR1C2	protein_coding;protein_coding;protein_coding;protein_coding;protein_coding;protein_coding;protein_coding;protein_coding	ENST00000434459.5;ENST00000380753.7;ENST00000407674.4;ENST00000421196.6;ENST00000455190.2;ENST00000460124.4;ENST00000604184.1;ENST00000604507.4	39354;1224;132427;1061;1215;1224;1062;15156	CGI:chr10:4825933-4826605	.
cg10880599	GPX2	-0.379498	5.51	chr14	64941762	64941763	CHURC1;CHURC1;CHURC1-FNTB;CHURC1-FNTB;CHURC1-FNTB;CHURC1-FNTB;GPX2;GPX2;GPX2;GPX2;GPX2	protein_coding;protein_coding;protein_coding;protein_coding;protein_coding;protein_coding;protein_coding;protein_coding;protein_coding;protein_coding;protein_coding	ENST00000551093.4;ENST00000551947.4;ENST00000549987.1;ENST00000551823.1;ENST00000552941.4;ENST00000553743.4;ENST00000389614.5;ENST00000553522.1;ENST00000557049.1;ENST00000557323.1;ENST00000612794.1	27284;27318;27268;17725;27276;17725;1052;984;959;985;1144	CGI:chr14:64914357-64914664	.
cg09643186	GPX2	-0.330261	5.51	chr14	64942734	64942735	CHURC1;CHURC1;CHURC1-FNTB;CHURC1-FNTB;CHURC1-FNTB;CHURC1-FNTB;GPX2;GPX2;GPX2;GPX2;GPX2	protein_coding;protein_coding;protein_coding;protein_coding;protein_coding;protein_coding;protein_coding;protein_coding;protein_coding;protein_coding;protein_coding	ENST00000551093.4;ENST00000551947.4;ENST00000549987.1;ENST00000551823.1;ENST00000552941.4;ENST00000553743.4;ENST00000389614.5;ENST00000553522.1;ENST00000557049.1;ENST00000557323.1;ENST00000612794.1	28256;28290;28240;18697;28248;18697;80;12;-13;13;172	CGI:chr14:64914357-64914664	.
cg26155983	GPX2	-0.321305	5.51	chr14	64943427	64943428	CHURC1;CHURC1;CHURC1-FNTB;CHURC1-FNTB;CHURC1-FNTB;CHURC1-FNTB;GPX2;GPX2;GPX2;GPX2;GPX2	protein_coding;protein_coding;protein_coding;protein_coding;protein_coding;protein_coding;protein_coding;protein_coding;protein_coding;protein_coding;protein_coding	ENST00000551093.4;ENST00000551947.4;ENST00000549987.1;ENST00000551823.1;ENST00000552941.4;ENST00000553743.4;ENST00000389614.5;ENST00000553522.1;ENST00000557049.1;ENST00000557323.1;ENST00000612794.1	28949;28983;28933;19390;28941;19390;-613;-681;-706;-680;-521	CGI:chr14:64971694-64972645	.
cg19648686	AKR1C1	-0.333994	5.31	chr10	5002800	5002801	AKR1C1;AKR1C2;AKR1C2;AKR1C2;AKR1C2;AKR1C2;AKR1C2;AKR1C2	protein_coding;protein_coding;protein_coding;protein_coding;protein_coding;protein_coding;protein_coding;protein_coding	ENST00000434459.5;ENST00000380753.7;ENST00000407674.4;ENST00000421196.6;ENST00000455190.2;ENST00000460124.4;ENST00000604184.1;ENST00000604507.4	39354;1224;132427;1061;1215;1224;1062;15156	CGI:chr10:4825933-4826605	.
cg19378330	ABCC2	0.201648	3.94	chr10	99846231	99846232	ABCC2	protein_coding	ENST00000370449.7	63498	CGI:chr10:99840130-99840469	.
cg18484212	SRXN1	-0.310776	2.37	chr20	650817	650818	RP5-850E9.3;SRXN1	protein_coding;protein_coding	ENST00000488788.2;ENST00000381962.3	24984;2554	CGI:chr20:652897-653462	N_Shelf
cg03331715	TXNRD1	-0.343764	2.09	chr12	104295309	104295310	TXNRD1;TXNRD1;TXNRD1;TXNRD1;TXNRD1;TXNRD1;TXNRD1;TXNRD1;TXNRD1;TXNRD1;TXNRD1;TXNRD1;TXNRD1;TXNRD1;TXNRD1;TXNRD1;TXNRD1;TXNRD1;TXNRD1	protein_coding;protein_coding;protein_coding;protein_coding;protein_coding;protein_coding;protein_coding;protein_coding;protein_coding;protein_coding;protein_coding;protein_coding;protein_coding;protein_coding;protein_coding;protein_coding;protein_coding;protein_coding;protein_coding	ENST00000354940.9;ENST00000388854.6;ENST00000397736.5;ENST00000429002.5;ENST00000503506.5;ENST00000524698.4;ENST00000525566.4;ENST00000526266.4;ENST00000526390.4;ENST00000526580.4;ENST00000526691.4;ENST00000527335.4;ENST00000527688.4;ENST00000528079.5;ENST00000529546.4;ENST00000529751.1;ENST00000529784.4;ENST00000531689.4;ENST00000531691.4	8626;8626;8626;79529;8626;7940;79529;9306;8318;8251;8427;6413;6590;8259;8286;8284;7986;8313;8383	CGI:chr12:104288823-104289215	.
cg02731193	GCLC	-0.340017	1.81	chr6	53542388	53542389	GCLC;GCLC;GCLC;GCLC;GCLC;GCLC	protein_coding;protein_coding;protein_coding;protein_coding;protein_coding;protein_coding	ENST00000229416.9;ENST00000504525.1;ENST00000505197.1;ENST00000513939.4;ENST00000514004.4;ENST00000616923.3	2742;2701;74583;2221;2646;2742	CGI:chr6:53544322-53545301	N_Shore
cg04909257	PGD	-0.359443	1.68	chr1	10402441	10402442	PGD;PGD;PGD;PGD;PGD;PGD	protein_coding;protein_coding;protein_coding;protein_coding;protein_coding;protein_coding	ENST00000270776.11;ENST00000460189.1;ENST00000465632.4;ENST00000477958.4;ENST00000483936.4;ENST00000491493.4	3360;2808;2942;3367;3328;3848	CGI:chr1:10398491-10399940	S_Shelf
cg26687670	OPN3	-0.232872	1.48	chr1	241641637	241641638	OPN3;OPN3;OPN3;OPN3;OPN3	protein_coding;protein_coding;protein_coding;protein_coding;protein_coding	ENST00000366554.2;ENST00000463155.4;ENST00000469376.4;ENST00000478849.1;ENST00000490673.4	-1275;35740;-1296;-1426;-1281	CGI:chr1:241640245-241640590	S_Shore
cg08162224	OPN3	-0.227253	1.48	chr1	241641119	241641120	OPN3;OPN3;OPN3;OPN3;OPN3	protein_coding;protein_coding;protein_coding;protein_coding;protein_coding	ENST00000366554.2;ENST00000463155.4;ENST00000469376.4;ENST00000478849.1;ENST00000490673.4	-757;36258;-778;-908;-763	CGI:chr1:241640245-241640590	S_Shore
cg04806177	MSRB1	-0.348812	1	chr16	1941446	1941447	MSRB1;MSRB1;MSRB1;MSRB1;MSRB1;MSRB1	protein_coding;protein_coding;protein_coding;protein_coding;protein_coding;protein_coding	ENST00000361871.6;ENST00000399753.2;ENST00000473663.1;ENST00000489198.1;ENST00000564908.1;ENST00000622125.3	1881;1750;1678;494;1754;1848	CGI:chr16:1942667-1943645	N_Shore
cg11026867	SCNN1A	-0.205763	0.68	chr12	6364477	6364478	SCNN1A;SCNN1A;SCNN1A;SCNN1A;SCNN1A;SCNN1A;SCNN1A;SCNN1A;SCNN1A;SCNN1A	protein_coding;protein_coding;protein_coding;protein_coding;protein_coding;protein_coding;protein_coding;protein_coding;protein_coding;protein_coding	ENST00000228916.5;ENST00000338748.8;ENST00000360168.6;ENST00000396966.5;ENST00000536176.1;ENST00000538979.4;ENST00000540037.4;ENST00000542966.1;ENST00000543768.1;ENST00000544882.1	11073;10327;10748;10327;10903;10958;-329;-851;12883;11087	CGI:chr12:6363310-6364156	S_Shore
cg00926657	MAFG	-0.343774	0.67	chr17	81922946	81922947	MAFG;MAFG;MAFG;RP11-498C9.12	protein_coding;protein_coding;protein_coding;antisense	ENST00000357736.7;ENST00000392366.6;ENST00000574686.1;ENST00000580897.1	4769;587;4763;46	CGI:chr17:81922573-81922996	Island
cg09489844	MAFG	-0.320909	0.67	chr17	81922771	81922772	MAFG;MAFG;RP11-498C9.12;SIRT7	protein_coding;protein_coding;antisense;protein_coding	ENST00000357736.7;ENST00000392366.6;ENST00000580897.1;ENST00000572902.4	4944;762;-129;-1447	CGI:chr17:81922573-81922996	Island
cg23012192	SQSTM1	-0.304844	0.66	chr5	179823985	179823986	SQSTM1;SQSTM1;SQSTM1;SQSTM1;SQSTM1;SQSTM1;SQSTM1;SQSTM1;SQSTM1;SQSTM1	protein_coding;protein_coding;protein_coding;protein_coding;protein_coding;protein_coding;protein_coding;protein_coding;protein_coding;protein_coding	ENST00000360718.5;ENST00000389805.7;ENST00000422245.4;ENST00000464493.4;ENST00000466342.1;ENST00000485412.1;ENST00000504627.1;ENST00000508284.4;ENST00000510187.4;ENST00000514093.4	1499;3225;5106;3377;126;419;3079;3106;3063;17576	CGI:chr5:179820784-179821711	S_Shelf
cg11409350	NT5C	-0.200383	0.63	chr17	75130404	75130405	NT5C;NT5C;NT5C;NT5C;NT5C;NT5C;NT5C;NT5C;RP11-649A18.3	protein_coding;protein_coding;protein_coding;protein_coding;protein_coding;protein_coding;protein_coding;protein_coding;TEC	ENST00000245552.5;ENST00000577523.4;ENST00000578407.4;ENST00000580423.4;ENST00000580758.4;ENST00000582160.4;ENST00000582744.4;ENST00000583655.4;ENST00000625094.1	1392;1022;1280;855;1340;1043;1070;1346;-480	CGI:chr17:75131101-75131900	N_Shore
cg08996506	ABCC1	-0.21192	0.59	chr16	15977011	15977012	ABCC1;ABCC1	protein_coding;protein_coding	ENST00000399408.5;ENST00000399410.6	27433;27433	CGI:chr16:15949361-15950070	.
cg24775180	PUS1	-0.22168	0.53	chr12	131939154	131939155	PUS1;PUS1;PUS1;PUS1;PUS1;PUS1;PUS1	protein_coding;protein_coding;protein_coding;protein_coding;protein_coding;protein_coding;protein_coding	ENST00000322060.8;ENST00000376649.6;ENST00000443358.5;ENST00000535067.4;ENST00000537484.1;ENST00000538037.4;ENST00000542167.2	9911;9930;9953;9398;9388;9871;9877	CGI:chr12:131944983-131945194	.
cg14510688	PUS1	-0.210528	0.53	chr12	131939181	131939182	PUS1;PUS1;PUS1;PUS1;PUS1;PUS1;PUS1	protein_coding;protein_coding;protein_coding;protein_coding;protein_coding;protein_coding;protein_coding	ENST00000322060.8;ENST00000376649.6;ENST00000443358.5;ENST00000535067.4;ENST00000537484.1;ENST00000538037.4;ENST00000542167.2	9938;9957;9980;9425;9415;9898;9904	CGI:chr12:131944983-131945194	.
cg09489844	SIRT7	-0.320909	0.38	chr17	81922771	81922772	MAFG;MAFG;RP11-498C9.12;SIRT7	protein_coding;protein_coding;antisense;protein_coding	ENST00000357736.7;ENST00000392366.6;ENST00000580897.1;ENST00000572902.4	4944;762;-129;-1447	CGI:chr17:81922573-81922996	Island
cg20466478	BRF2	-0.220813	0.37	chr8	37851091	37851092	BRF2;BRF2;BRF2;BRF2	protein_coding;protein_coding;protein_coding;protein_coding	ENST00000220659.9;ENST00000520601.4;ENST00000521170.4;ENST00000522539.1	-1186;-1252;-1229;-1236	CGI:chr8:37849631-37849989	S_Shore
cg14186816	NEDD4L	0.212883	0.37	chr18	58195531	58195532	NEDD4L;NEDD4L;NEDD4L;NEDD4L;NEDD4L;NEDD4L;NEDD4L;NEDD4L;NEDD4L;NEDD4L;NEDD4L;NEDD4L;NEDD4L;NEDD4L;NEDD4L;RP11-718I15.1;RP11-718I15.1	protein_coding;protein_coding;protein_coding;protein_coding;protein_coding;protein_coding;protein_coding;protein_coding;protein_coding;protein_coding;protein_coding;protein_coding;protein_coding;protein_coding;protein_coding;antisense;antisense	ENST00000256830.12;ENST00000356462.9;ENST00000357895.8;ENST00000382850.7;ENST00000400345.6;ENST00000435432.5;ENST00000456173.5;ENST00000456986.4;ENST00000585363.4;ENST00000586263.4;ENST00000588494.4;ENST00000588516.4;ENST00000589054.4;ENST00000591989.4;ENST00000592846.4;ENST00000586824.1;ENST00000593212.4	150869;151163;46197;150982;151152;46197;140;148304;149596;46193;-123;149167;151146;149841;149823;166;146	CGI:chr18:58195421-58195641	Island
cg15245625	NEDD4L	0.220955	0.37	chr18	58195444	58195445	NEDD4L;NEDD4L;NEDD4L;NEDD4L;NEDD4L;NEDD4L;NEDD4L;NEDD4L;NEDD4L;NEDD4L;NEDD4L;NEDD4L;NEDD4L;NEDD4L;NEDD4L;RP11-718I15.1;RP11-718I15.1	protein_coding;protein_coding;protein_coding;protein_coding;protein_coding;protein_coding;protein_coding;protein_coding;protein_coding;protein_coding;protein_coding;protein_coding;protein_coding;protein_coding;protein_coding;antisense;antisense	ENST00000256830.12;ENST00000356462.9;ENST00000357895.8;ENST00000382850.7;ENST00000400345.6;ENST00000435432.5;ENST00000456173.5;ENST00000456986.4;ENST00000585363.4;ENST00000586263.4;ENST00000588494.4;ENST00000588516.4;ENST00000589054.4;ENST00000591989.4;ENST00000592846.4;ENST00000586824.1;ENST00000593212.4	150782;151076;46110;150895;151065;46110;53;148217;149509;46106;-210;149080;151059;149754;149736;253;233	CGI:chr18:58195421-58195641	Island
cg15733882	NEDD4L	0.231571	0.37	chr18	58195395	58195396	NEDD4L;NEDD4L;NEDD4L;NEDD4L;NEDD4L;NEDD4L;NEDD4L;NEDD4L;NEDD4L;NEDD4L;NEDD4L;NEDD4L;NEDD4L;NEDD4L;NEDD4L;RP11-718I15.1;RP11-718I15.1	protein_coding;protein_coding;protein_coding;protein_coding;protein_coding;protein_coding;protein_coding;protein_coding;protein_coding;protein_coding;protein_coding;protein_coding;protein_coding;protein_coding;protein_coding;antisense;antisense	ENST00000256830.12;ENST00000356462.9;ENST00000357895.8;ENST00000382850.7;ENST00000400345.6;ENST00000435432.5;ENST00000456173.5;ENST00000456986.4;ENST00000585363.4;ENST00000586263.4;ENST00000588494.4;ENST00000588516.4;ENST00000589054.4;ENST00000591989.4;ENST00000592846.4;ENST00000586824.1;ENST00000593212.4	150733;151027;46061;150846;151016;46061;4;148168;149460;46057;-259;149031;151010;149705;149687;302;282	CGI:chr18:58195421-58195641	N_Shore
cg25693302	NEDD4L	0.275434	0.37	chr18	58195446	58195447	NEDD4L;NEDD4L;NEDD4L;NEDD4L;NEDD4L;NEDD4L;NEDD4L;NEDD4L;NEDD4L;NEDD4L;NEDD4L;NEDD4L;NEDD4L;NEDD4L;NEDD4L;RP11-718I15.1;RP11-718I15.1	protein_coding;protein_coding;protein_coding;protein_coding;protein_coding;protein_coding;protein_coding;protein_coding;protein_coding;protein_coding;protein_coding;protein_coding;protein_coding;protein_coding;protein_coding;antisense;antisense	ENST00000256830.12;ENST00000356462.9;ENST00000357895.8;ENST00000382850.7;ENST00000400345.6;ENST00000435432.5;ENST00000456173.5;ENST00000456986.4;ENST00000585363.4;ENST00000586263.4;ENST00000588494.4;ENST00000588516.4;ENST00000589054.4;ENST00000591989.4;ENST00000592846.4;ENST00000586824.1;ENST00000593212.4	150784;151078;46112;150897;151067;46112;55;148219;149511;46108;-208;149082;151061;149756;149738;251;231	CGI:chr18:58195421-58195641	Island
cg02694576	PTDSS2	-0.237109	0.35	chr11	488017	488018	PTDSS2;PTDSS2;PTDSS2;PTDSS2	protein_coding;protein_coding;protein_coding;protein_coding	ENST00000308020.5;ENST00000526878.4;ENST00000527325.1;ENST00000531411.1	37736;29342;777;-1334	CGI:chr11:489247-490115	N_Shore
cg11705747	UGGT1	-0.223123	0.26	chr2	128187494	128187495	UGGT1;UGGT1;UGGT1;UGGT1	protein_coding;protein_coding;protein_coding;protein_coding	ENST00000259253.9;ENST00000376723.6;ENST00000418197.1;ENST00000465836.1	96182;96282;7707;256	CGI:chr2:128232935-128233751	.
cg04020792	ATP2A2	-0.277478	0.21	chr12	110340709	110340710	ATP2A2;ATP2A2;ATP2A2;ATP2A2	protein_coding;protein_coding;protein_coding;protein_coding	ENST00000308664.9;ENST00000377685.8;ENST00000539276.5;ENST00000548169.2	59592;59411;59027;48659	CGI:chr12:110280587-110282257	.
cg19509829	ATP2A2	-0.268004	0.21	chr12	110340860	110340861	ATP2A2;ATP2A2;ATP2A2;ATP2A2	protein_coding;protein_coding;protein_coding;protein_coding	ENST00000308664.9;ENST00000377685.8;ENST00000539276.5;ENST00000548169.2	59743;59562;59178;48810	CGI:chr12:110280587-110282257	.
cg21531873	ATP2A2	-0.216248	0.21	chr12	110340811	110340812	ATP2A2;ATP2A2;ATP2A2;ATP2A2	protein_coding;protein_coding;protein_coding;protein_coding	ENST00000308664.9;ENST00000377685.8;ENST00000539276.5;ENST00000548169.2	59694;59513;59129;48761	CGI:chr12:110280587-110282257	.
cg05089897	DYRK1A	-0.23293	-0.15	chr21	37514361	37514362	DYRK1A;DYRK1A	protein_coding;protein_coding	ENST00000338785.6;ENST00000339659.7	146783;95455	CGI:chr21:37563552-37564244	.
cg26161708	RRBP1	-0.237385	-0.29	chr20	17614803	17614804	RRBP1;RRBP1;RRBP1;RRBP1;RRBP1;RRBP1;RRBP1;RRBP1	protein_coding;protein_coding;protein_coding;protein_coding;protein_coding;protein_coding;protein_coding;protein_coding	ENST00000246043.7;ENST00000360807.7;ENST00000377807.5;ENST00000377813.4;ENST00000455029.3;ENST00000468428.1;ENST00000470422.4;ENST00000610403.3	45705;67493;67481;67431;67258;5015;8528;45171	CGI:chr20:17614626-17614838	Island
cg12632411	RRBP1	-0.204791	-0.29	chr20	17614710	17614711	RRBP1;RRBP1;RRBP1;RRBP1;RRBP1;RRBP1;RRBP1;RRBP1	protein_coding;protein_coding;protein_coding;protein_coding;protein_coding;protein_coding;protein_coding;protein_coding	ENST00000246043.7;ENST00000360807.7;ENST00000377807.5;ENST00000377813.4;ENST00000455029.3;ENST00000468428.1;ENST00000470422.4;ENST00000610403.3	45798;67586;67574;67524;67351;5108;8621;45264	CGI:chr20:17614626-17614838	Island
cg05309505	IRF7	-0.216334	-0.36	chr11	612837	612838	IRF7;IRF7;IRF7;IRF7;IRF7;IRF7;IRF7;IRF7;IRF7;IRF7;IRF7	protein_coding;protein_coding;protein_coding;protein_coding;protein_coding;protein_coding;protein_coding;protein_coding;protein_coding;protein_coding;protein_coding	ENST00000330243.8;ENST00000348655.9;ENST00000397566.4;ENST00000397570.4;ENST00000397574.5;ENST00000469048.4;ENST00000525445.4;ENST00000528413.4;ENST00000531912.1;ENST00000532326.4;ENST00000533182.4	3134;2814;2892;2892;3163;2814;2790;1018;755;3147;3114	CGI:chr11:611691-611943	S_Shore
cg04579966	SPATA13	0.21353	-0.38	chr13	24272083	24272084	RP11-307N16.6;SPATA13;SPATA13;SPATA13;SPATA13;SPATA13;SPATA13;SPATA13;SPATA13;SPATA13;SPATA13	protein_coding;protein_coding;protein_coding;protein_coding;protein_coding;protein_coding;protein_coding;protein_coding;protein_coding;protein_coding;protein_coding	ENST00000382141.4;ENST00000343003.9;ENST00000382095.7;ENST00000382108.6;ENST00000399949.5;ENST00000409126.4;ENST00000424834.5;ENST00000434675.4;ENST00000454083.1;ENST00000488060.1;ENST00000494772.4	292382;1395;111334;111366;1394;1363;292277;20388;1241;-607;20364	CGI:chr13:24307960-24308727	.
cg00225623	SPATA13	0.214151	-0.38	chr13	24271753	24271754	RP11-307N16.6;SPATA13;SPATA13;SPATA13;SPATA13;SPATA13;SPATA13;SPATA13;SPATA13;SPATA13;SPATA13	protein_coding;protein_coding;protein_coding;protein_coding;protein_coding;protein_coding;protein_coding;protein_coding;protein_coding;protein_coding;protein_coding	ENST00000382141.4;ENST00000343003.9;ENST00000382095.7;ENST00000382108.6;ENST00000399949.5;ENST00000409126.4;ENST00000424834.5;ENST00000434675.4;ENST00000454083.1;ENST00000488060.1;ENST00000494772.4	292052;1065;111004;111036;1064;1033;291947;20058;911;-937;20034	CGI:chr13:24307960-24308727	.
cg15242225	RUNX1	0.201105	-0.52	chr21	35049560	35049561	RUNX1;RUNX1;RUNX1;RUNX1;RUNX1;RUNX1	protein_coding;protein_coding;protein_coding;protein_coding;protein_coding;protein_coding	ENST00000300305.6;ENST00000416754.1;ENST00000437180.4;ENST00000455571.4;ENST00000475045.5;ENST00000482318.4	-215;-289;-261;-261;955108;-271	CGI:chr21:35026663-35026962	.
cg04915566	RUNX1	0.216641	-0.52	chr21	35049175	35049176	RUNX1;RUNX1;RUNX1;RUNX1;RUNX1;RUNX1	protein_coding;protein_coding;protein_coding;protein_coding;protein_coding;protein_coding	ENST00000300305.6;ENST00000416754.1;ENST00000437180.4;ENST00000455571.4;ENST00000475045.5;ENST00000482318.4	170;96;124;124;955493;114	CGI:chr21:35026663-35026962	.
cg19836199	RUNX1	0.230932	-0.52	chr21	35049644	35049645	RUNX1;RUNX1;RUNX1;RUNX1;RUNX1;RUNX1	protein_coding;protein_coding;protein_coding;protein_coding;protein_coding;protein_coding	ENST00000300305.6;ENST00000416754.1;ENST00000437180.4;ENST00000455571.4;ENST00000475045.5;ENST00000482318.4	-299;-373;-345;-345;955024;-355	CGI:chr21:35026663-35026962	.
cg16204066	ITPR3	-0.216904	-0.64	chr6	33671145	33671146	ITPR3;ITPR3	protein_coding;protein_coding	ENST00000374316.8;ENST00000605930.2	50779;49765	CGI:chr6:33688189-33688461	.
cg22836359	GPR162	-0.23307	-0.67	chr12	6824382	6824383	GPR162;GPR162;GPR162;GPR162;GPR162;GPR162	protein_coding;protein_coding;protein_coding;protein_coding;protein_coding;protein_coding	ENST00000311268.6;ENST00000382315.6;ENST00000428545.5;ENST00000535220.1;ENST00000541431.1;ENST00000545321.1	2836;2513;2677;2757;2552;-113	CGI:chr12:6824110-6824439	Island
cg14055970	ENG	-0.229248	-0.71	chr9	127825436	127825437	ENG;ENG;ENG;ENG	protein_coding;protein_coding;protein_coding;protein_coding	ENST00000344849.4;ENST00000373203.7;ENST00000480266.4;ENST00000486329.1	29201;29321;21732;-1030	CGI:chr9:127825253-127825810	Island
cg13656752	STK10	0.210975	-0.72	chr5	172111330	172111331	STK10;STK10;STK10;STK10;STK10	protein_coding;protein_coding;protein_coding;protein_coding;protein_coding	ENST00000176763.8;ENST00000517381.1;ENST00000518267.4;ENST00000519710.1;ENST00000522936.4	77057;3471;3815;45396;3471	CGI:chr5:172055569-172055773	.
cg13713739	PRRX2	-0.239752	-0.82	chr9	129721098	129721099	PRRX2	protein_coding	ENST00000372469.5	55456	CGI:chr9:129720119-129720359	S_Shore
cg01189072	MMP23B	-0.250148	-0.88	chr1	1679221	1679222	CDK11B;MMP23B;MMP23B;SLC35E2B;SLC35E2B;SLC35E2B;SLC35E2B	protein_coding;protein_coding;protein_coding;protein_coding;protein_coding;protein_coding;protein_coding	ENST00000317673.8;ENST00000412810.5;ENST00000618459.3;ENST00000481276.1;ENST00000611123.1;ENST00000614300.3;ENST00000617444.3	43598;47039;47041;13489;13508;13504;13424	CGI:chr1:1676459-1676804	S_Shelf
cg16440561	SPEG	-0.213164	-0.97	chr2	219448132	219448133	SPEG;SPEG;SPEG;SPEG;SPEG;SPEG;SPEG;SPEG;SPEG;SPEG;SPEG;SPEG	protein_coding;protein_coding;protein_coding;protein_coding;protein_coding;protein_coding;protein_coding;protein_coding;protein_coding;protein_coding;protein_coding;protein_coding	ENST00000312358.10;ENST00000396698.4;ENST00000409595.2;ENST00000431523.4;ENST00000435853.4;ENST00000451076.1;ENST00000452101.1;ENST00000464989.4;ENST00000485813.4;ENST00000491248.1;ENST00000497065.1;ENST00000498378.4	13285;6086;3086;6108;6615;3474;6084;4457;2504;2551;2580;10856	CGI:chr2:219447976-219449372	Island
cg06632214	IFITM1	0.259142	-1.02	chr11	314074	314075	IFITM1	protein_coding;protein_coding;protein_coding;protein_coding;protein_coding	ENST00000328221.5;ENST00000408968.3;ENST00000525554.1;ENST00000528780.4;ENST00000399815.2	546;220;-345;567;5665	CGI:chr11:315739-316539	N_Shore
cg06911744	PRDM16	-0.204631	-1.21	chr1	3359943	3359944	PRDM16;PRDM16;PRDM16;PRDM16;PRDM16;PRDM16	protein_coding;protein_coding;protein_coding;protein_coding;protein_coding;protein_coding	ENST00000270722.8;ENST00000378391.5;ENST00000463591.1;ENST00000511072.4;ENST00000512462.4;ENST00000514189.4	290731;290745;115810;290774;122011;290731	CGI:chr1:3358465-3358720	S_Shore
