# Supplementary material for: Integrated data analysis reveals significant associations of KEAP1 mutations with DNA methylation alterations in lung adenocarcinomas
Source: Aging (Albany NY). 2020 Apr 23;12(8):7183–206. doi: 10.18632/aging.103068 (PMC7202502; doi:10.18632/aging.103068)
Supplement: Supplementary File 8 [file aging-12-103068-s006..xlsx]

## Sheet: Sheet1
KEAP1 muated VS wild type patient samples (Validation data set)
Probe	mean_keap1 .mut	mean_wild type	Detla_Beta	p_value	Q_value	Chromosome	Start	End	Gene_Symbol	Gene_Type	Transcript_ID	Position_to_TSS	CGI_Coordinate	Feature_Type
cg00926657	0.425943	0.82619	-0.400247	4.55309e-16	2.92418e-14	chr17	81922946	81922947	MAFG;MAFG;MAFG;RP11-498C9.12	protein_coding;protein_coding;protein_coding;antisense	ENST00000357736.7;ENST00000392366.6;ENST00000574686.1;ENST00000580897.1	4769;587;4763;46	CGI:chr17:81922573-81922996	Island
cg09489844	0.578586	0.96441	-0.385824	2.12166e-16	1.68672e-14	chr17	81922771	81922772	MAFG;MAFG;RP11-498C9.12;SIRT7	protein_coding;protein_coding;antisense;protein_coding	ENST00000357736.7;ENST00000392366.6;ENST00000580897.1;ENST00000572902.4	4944;762;-129;-1447	CGI:chr17:81922573-81922996	Island
cg13713739	0.471839	0.829052	-0.357213	9.64809e-10	4.47445e-09	chr9	129721098	129721099	PRRX2	protein_coding	ENST00000372469.5	55456	CGI:chr9:129720119-129720359	S_Shore
cg09562655	0.573531	0.930285	-0.356754	7.44451e-10	3.64208e-09	chr3	185986417	185986418	.	.	.	.	CGI:chr3:185937268-185938241	.
cg10880599	0.495141	0.844004	-0.348863	6.94635e-14	1.84078e-12	chr14	64941762	64941763	CHURC1;CHURC1;CHURC1-FNTB;CHURC1-FNTB;CHURC1-FNTB;CHURC1-FNTB;GPX2;GPX2;GPX2;GPX2;GPX2	protein_coding;protein_coding;protein_coding;protein_coding;protein_coding;protein_coding;protein_coding;protein_coding;protein_coding;protein_coding;protein_coding	ENST00000551093.4;ENST00000551947.4;ENST00000549987.1;ENST00000551823.1;ENST00000552941.4;ENST00000553743.4;ENST00000389614.5;ENST00000553522.1;ENST00000557049.1;ENST00000557323.1;ENST00000612794.1	27284;27318;27268;17725;27276;17725;1052;984;959;985;1144	CGI:chr14:64914357-64914664	.
cg03217915	0.550024	0.881738	-0.331714	7.45669e-07	1.19759e-06	*	-1	-1	.	.	.	.	.	.
cg03331715	0.441214	0.766943	-0.325729	2.93999e-18	3.11639e-16	chr12	104295309	104295310	TXNRD1;TXNRD1;TXNRD1;TXNRD1;TXNRD1;TXNRD1;TXNRD1;TXNRD1;TXNRD1;TXNRD1;TXNRD1;TXNRD1;TXNRD1;TXNRD1;TXNRD1;TXNRD1;TXNRD1;TXNRD1;TXNRD1	protein_coding;protein_coding;protein_coding;protein_coding;protein_coding;protein_coding;protein_coding;protein_coding;protein_coding;protein_coding;protein_coding;protein_coding;protein_coding;protein_coding;protein_coding;protein_coding;protein_coding;protein_coding;protein_coding	ENST00000354940.9;ENST00000388854.6;ENST00000397736.5;ENST00000429002.5;ENST00000503506.5;ENST00000524698.4;ENST00000525566.4;ENST00000526266.4;ENST00000526390.4;ENST00000526580.4;ENST00000526691.4;ENST00000527335.4;ENST00000527688.4;ENST00000528079.5;ENST00000529546.4;ENST00000529751.1;ENST00000529784.4;ENST00000531689.4;ENST00000531691.4	8626;8626;8626;79529;8626;7940;79529;9306;8318;8251;8427;6413;6590;8259;8286;8284;7986;8313;8383	CGI:chr12:104288823-104289215	.
cg14420550	0.51419	0.837921	-0.323731	1.9903e-12	2.94379e-11	chr6	14777909	14777910	RP11-146I2.1	lincRNA	ENST00000629853.1	244056	CGI:chr6:15244646-15245802	.
cg05089897	0.52671	0.850129	-0.323419	6.5542e-14	1.84078e-12	chr21	37514361	37514362	DYRK1A;DYRK1A	protein_coding;protein_coding	ENST00000338785.6;ENST00000339659.7	146783;95455	CGI:chr21:37563552-37564244	.
cg09893465	0.524113	0.846158	-0.322045	6.35156e-07	1.05198e-06	chr10	132774536	132774537	INPP5A;INPP5A;INPP5A;INPP5A	protein_coding;protein_coding;protein_coding;protein_coding	ENST00000342652.6;ENST00000368593.6;ENST00000368594.6;ENST00000445580.1	166609;236686;236715;8711	CGI:chr10:132772666-132772967	S_Shore
cg20372666	0.506218	0.823724	-0.317506	1.90279e-11	1.72199e-10	chr10	69390154	69390155	HK1;HK1;HK1;HK1	protein_coding;protein_coding;protein_coding;protein_coding	ENST00000298649.6;ENST00000359426.6;ENST00000360289.5;ENST00000448642.5	74299;71309;120153;120153	CGI:chr10:69408649-69409196	.
cg06427821	0.50405	0.813595	-0.309545	6.19675e-08	1.42795e-07	chr16	849090	849091	LA16c-360A4.1	lincRNA	ENST00000619963.1	-24	CGI:chr16:848972-849173	Island
cg00230074	0.550452	0.856734	-0.306282	8.95134e-08	1.91685e-07	chr17	74361903	74361904	BTBD17	protein_coding	ENST00000375366.3	44	CGI:chr17:74359957-74360188	S_Shore
cg13355574	0.550455	0.851638	-0.301183	1.97496e-08	5.46119e-08	chr10	132916438	132916439	CFAP46;CFAP46	protein_coding;protein_coding	ENST00000368586.8;ENST00000486104.4	26148;245	CGI:chr10:132916294-132916518	Island
cg09918657	0.127507	0.427322	-0.299815	5.51944e-19	8.77591e-17	chr16	14303350	14303351	MIR193B;RP11-65J21.3;RP11-65J21.3	miRNA;lincRNA;lincRNA	ENST00000384907.1;ENST00000570945.1;ENST00000571639.1	-618;1061;844	CGI:chr16:14301747-14303218	S_Shore
cg10420310	0.320247	0.61661	-0.296363	5.42243e-15	2.46333e-13	chr16	14303719	14303720	MIR193B;RP11-65J21.3;RP11-65J21.3	miRNA;lincRNA;lincRNA	ENST00000384907.1;ENST00000570945.1;ENST00000571639.1	-249;1430;1213	CGI:chr16:14301747-14303218	S_Shore
cg20542619	0.438681	0.734683	-0.296002	5.20469e-12	6.75548e-11	chr18	79529104	79529105	NFATC1;NFATC1;NFATC1;NFATC1;NFATC1	protein_coding;protein_coding;protein_coding;protein_coding;protein_coding	ENST00000253506.8;ENST00000318065.8;ENST00000329101.7;ENST00000397790.5;ENST00000545796.4	133247;128781;128767;133159;128829	CGI:chr18:79529018-79529464	Island
cg23401796	0.566709	0.861794	-0.295085	3.02277e-06	4.1255e-06	chr8	140238568	140238569	TRAPPC9;TRAPPC9;TRAPPC9;TRAPPC9;TRAPPC9;TRAPPC9;TRAPPC9	protein_coding;protein_coding;protein_coding;protein_coding;protein_coding;protein_coding;protein_coding	ENST00000389328.7;ENST00000438773.2;ENST00000517667.4;ENST00000518839.1;ENST00000520532.4;ENST00000520857.4;ENST00000521667.4	220012;219195;-74;24163;24164;212363;52684	CGI:chr8:140338741-140339096	.
cg22836359	0.469823	0.763323	-0.2935	9.1213e-13	1.48747e-11	chr12	6824382	6824383	GPR162;GPR162;GPR162;GPR162;GPR162;GPR162	protein_coding;protein_coding;protein_coding;protein_coding;protein_coding;protein_coding	ENST00000311268.6;ENST00000382315.6;ENST00000428545.5;ENST00000535220.1;ENST00000541431.1;ENST00000545321.1	2836;2513;2677;2757;2552;-113	CGI:chr12:6824110-6824439	Island
cg25267258	0.510474	0.800681	-0.290207	2.34052e-06	3.2933e-06	chr6	29306843	29306844	OR14J1	protein_coding	ENST00000377160.3	152	CGI:chr6:29165687-29166196	.
cg09643186	0.477651	0.764956	-0.287305	1.86683e-12	2.82691e-11	chr14	64942734	64942735	CHURC1;CHURC1;CHURC1-FNTB;CHURC1-FNTB;CHURC1-FNTB;CHURC1-FNTB;GPX2;GPX2;GPX2;GPX2;GPX2	protein_coding;protein_coding;protein_coding;protein_coding;protein_coding;protein_coding;protein_coding;protein_coding;protein_coding;protein_coding;protein_coding	ENST00000551093.4;ENST00000551947.4;ENST00000549987.1;ENST00000551823.1;ENST00000552941.4;ENST00000553743.4;ENST00000389614.5;ENST00000553522.1;ENST00000557049.1;ENST00000557323.1;ENST00000612794.1	28256;28290;28240;18697;28248;18697;80;12;-13;13;172	CGI:chr14:64914357-64914664	.
cg26161708	0.499276	0.783701	-0.284425	4.88302e-08	1.15881e-07	chr20	17614803	17614804	RRBP1;RRBP1;RRBP1;RRBP1;RRBP1;RRBP1;RRBP1;RRBP1	protein_coding;protein_coding;protein_coding;protein_coding;protein_coding;protein_coding;protein_coding;protein_coding	ENST00000246043.7;ENST00000360807.7;ENST00000377807.5;ENST00000377813.4;ENST00000455029.3;ENST00000468428.1;ENST00000470422.4;ENST00000610403.3	45705;67493;67481;67431;67258;5015;8528;45171	CGI:chr20:17614626-17614838	Island
cg03295417	0.428084	0.710068	-0.281984	3.31521e-11	2.84929e-10	chr16	14304035	14304036	MIR193B;RP11-65J21.3;RP11-65J21.3	miRNA;lincRNA;lincRNA	ENST00000384907.1;ENST00000570945.1;ENST00000571639.1	67;1746;1529	CGI:chr16:14301747-14303218	S_Shore
cg11401293	0.493818	0.775689	-0.281871	1.90917e-11	1.72199e-10	chr21	45984354	45984355	COL6A1;COL6A1	protein_coding;protein_coding	ENST00000361866.6;ENST00000612273.1	2616;2584	CGI:chr21:45984194-45984398	Island
cg07264062	0.535093	0.816528	-0.281435	4.03922e-08	9.80513e-08	chr8	1837792	1837793	ARHGEF10;ARHGEF10;ARHGEF10;ARHGEF10	protein_coding;protein_coding;protein_coding;protein_coding	ENST00000349830.6;ENST00000398564.4;ENST00000518288.4;ENST00000520359.4	13815;11680;13776;13803	CGI:chr8:1841813-1842102	.
cg00750880	0.434094	0.714521	-0.280427	1.36413e-09	5.86207e-09	chr17	77685086	77685087	.	.	.	.	CGI:chr17:77793244-77793471	.
cg07486474	0.480005	0.757016	-0.277011	2.16211e-06	3.06259e-06	chr4	634860	634861	PDE6B;PDE6B	protein_coding;protein_coding	ENST00000255622.9;ENST00000496514.4	9275;9253	CGI:chr4:634762-635605	Island
cg08387538	0.455674	0.732191	-0.276517	5.30352e-06	6.84186e-06	chr8	1579829	1579830	DLGAP2;DLGAP2;DLGAP2;DLGAP2-AS1	protein_coding;protein_coding;protein_coding;antisense	ENST00000421627.5;ENST00000520901.4;ENST00000612087.1;ENST00000518063.4	78462;31184;78462;40707	CGI:chr8:1561684-1563569	.
cg14108567	0.335568	0.611853	-0.276285	1.00079e-08	3.10489e-08	chr12	8564891	8564892	RP11-561P12.5	lincRNA	ENST00000542819.1	2723	CGI:chr12:8605154-8605483	.
cg09926389	0.551664	0.826814	-0.27515	6.95676e-08	1.56343e-07	chr19	41331218	41331219	TGFB1;TGFB1	protein_coding;protein_coding	ENST00000221930.5;ENST00000598758.4	22694;10813	CGI:chr19:41331109-41331325	Island
cg25259564	0.594626	0.869407	-0.274781	9.63981e-08	2.03685e-07	chr11	1060659	1060660	.	.	.	.	CGI:chr11:1056331-1056741	S_Shelf
cg15601682	0.548504	0.822519	-0.274015	9.82348e-09	3.06261e-08	chr17	80086322	80086323	CCDC40;CCDC40;CCDC40;CCDC40;CCDC40;CCDC40	protein_coding;protein_coding;protein_coding;protein_coding;protein_coding;protein_coding	ENST00000374877.6;ENST00000397545.7;ENST00000572253.4;ENST00000574799.4;ENST00000574933.1;ENST00000575431.1	49689;49685;4878;37951;-1382;-1193	CGI:chr17:80090161-80090370	N_Shelf
cg18805164	0.305448	0.5765	-0.271052	1.85323e-06	2.69715e-06	chr19	35774798	35774799	ARHGAP33;ARHGAP33;ARHGAP33;ARHGAP33;ARHGAP33	protein_coding;protein_coding;protein_coding;protein_coding;protein_coding	ENST00000007510.7;ENST00000314737.8;ENST00000378944.8;ENST00000589133.4;ENST00000590893.4	-805;-778;-718;265;-746	CGI:chr19:35775332-35775867	N_Shore
cg01221209	0.442742	0.713755	-0.271013	2.99355e-10	1.76287e-09	chr5	554771	554772	.	.	.	.	CGI:chr5:554708-555217	Island
cg24751154	0.463668	0.734285	-0.270617	6.67457e-07	1.09408e-06	chr5	3191773	3191774	.	.	.	.	CGI:chr5:3187985-3188261	S_Shelf
cg05982460	0.492422	0.761969	-0.269547	8.46266e-08	1.84324e-07	chr16	3161518	3161519	.	.	.	.	CGI:chr16:3157596-3159412	S_Shelf
cg22658846	0.596421	0.86519	-0.268769	1.04454e-07	2.1688e-07	chr8	2071641	2071642	MYOM2;MYOM2	protein_coding;protein_coding	ENST00000262113.7;ENST00000523438.1	26600;26571	CGI:chr8:2085456-2085709	.
cg05651243	0.333861	0.602212	-0.268351	6.41328e-08	1.46195e-07	chr11	134657124	134657125	.	.	.	.	CGI:chr11:134664348-134664563	.
cg05297739	0.540483	0.808796	-0.268313	3.61304e-10	2.0157e-09	chr21	36071951	36071952	AP000688.14;CBR1;CBR1;CBR1;SETD4	sense_intronic;protein_coding;protein_coding;protein_coding;protein_coding	ENST00000535199.4;ENST00000290349.9;ENST00000399191.3;ENST00000530908.4;ENST00000399201.4	54690;2009;1915;2009;7439	CGI:chr21:36069842-36070480	S_Shore
cg17919152	0.452636	0.720856	-0.26822	4.51743e-07	7.7651e-07	chr13	112204441	112204442	.	.	.	.	CGI:chr13:112194261-112194907	.
cg24775180	0.560526	0.827489	-0.266963	1.10117e-08	3.33497e-08	chr12	131939154	131939155	PUS1;PUS1;PUS1;PUS1;PUS1;PUS1;PUS1	protein_coding;protein_coding;protein_coding;protein_coding;protein_coding;protein_coding;protein_coding	ENST00000322060.8;ENST00000376649.6;ENST00000443358.5;ENST00000535067.4;ENST00000537484.1;ENST00000538037.4;ENST00000542167.2	9911;9930;9953;9398;9388;9871;9877	CGI:chr12:131944983-131945194	.
cg10572274	0.259605	0.526533	-0.266928	1.00792e-12	1.60259e-11	chr12	104303446	104303447	EID3;TXNRD1;TXNRD1;TXNRD1;TXNRD1;TXNRD1;TXNRD1;TXNRD1;TXNRD1;TXNRD1;TXNRD1;TXNRD1;TXNRD1;TXNRD1;TXNRD1;TXNRD1;TXNRD1;TXNRD1;TXNRD1;TXNRD1	protein_coding;protein_coding;protein_coding;protein_coding;protein_coding;protein_coding;protein_coding;protein_coding;protein_coding;protein_coding;protein_coding;protein_coding;protein_coding;protein_coding;protein_coding;protein_coding;protein_coding;protein_coding;protein_coding;protein_coding	ENST00000527879.1;ENST00000354940.9;ENST00000388854.6;ENST00000397736.5;ENST00000429002.5;ENST00000503506.5;ENST00000524698.4;ENST00000525566.4;ENST00000526266.4;ENST00000526390.4;ENST00000526580.4;ENST00000526691.4;ENST00000527335.4;ENST00000527688.4;ENST00000528079.5;ENST00000529546.4;ENST00000529751.1;ENST00000529784.4;ENST00000531689.4;ENST00000531691.4	-294;16763;16763;16763;87666;16763;16077;87666;17443;16455;16388;16564;14550;14727;16396;16423;16421;16123;16450;16520	CGI:chr12:104303570-104304206	N_Shore
cg20988291	0.289893	0.556564	-0.266671	4.06966e-10	2.23258e-09	chr6	19180500	19180501	.	.	.	.	CGI:chr6:19691679-19692074	.
cg21184216	0.45327	0.719864	-0.266594	1.02589e-09	4.62742e-09	chr5	103262333	103262334	C5orf30;C5orf30;C5orf30	protein_coding;protein_coding;protein_coding	ENST00000319933.5;ENST00000510890.1;ENST00000515669.4	3630;2908;3296	CGI:chr5:103258734-103259849	S_Shelf
cg14087921	0.54302	0.808517	-0.265497	1.79811e-05	2.08686e-05	chr9	135769112	135769113	KCNT1;KCNT1;KCNT1;KCNT1;KCNT1;KCNT1;KCNT1;KCNT1;KCNT1;KCNT1;KCNT1;KCNT1	protein_coding;protein_coding;protein_coding;protein_coding;protein_coding;protein_coding;protein_coding;protein_coding;protein_coding;protein_coding;protein_coding;protein_coding	ENST00000263604.4;ENST00000371757.5;ENST00000460750.4;ENST00000486577.5;ENST00000487664.4;ENST00000488444.5;ENST00000490355.5;ENST00000490363.2;ENST00000491806.5;ENST00000628528.1;ENST00000630792.1;ENST00000631073.1	32594;66919;66898;54591;66926;32481;32478;15360;32496;66926;54485;32486	CGI:chr9:135768651-135769378	Island
cg23332689	0.537978	0.803453	-0.265475	1.53128e-10	1.00401e-09	chr4	993864	993865	IDUA;IDUA;IDUA;IDUA;IDUA;IDUA;IDUA;IDUA;SLC26A1;SLC26A1;SLC26A1;SLC26A1	protein_coding;protein_coding;protein_coding;protein_coding;protein_coding;protein_coding;protein_coding;protein_coding;protein_coding;protein_coding;protein_coding;protein_coding	ENST00000247933.7;ENST00000502910.4;ENST00000504568.4;ENST00000506561.4;ENST00000508168.4;ENST00000509948.4;ENST00000514192.4;ENST00000514698.4;ENST00000361661.5;ENST00000398516.2;ENST00000398520.5;ENST00000622731.3	6866;6819;6776;6787;6797;1991;2038;6819;-427;-423;-487;-423	CGI:chr4:991138-991907	S_Shore
cg06074146	0.465781	0.728377	-0.262596	3.54795e-10	1.9969e-09	chr13	20724310	20724311	.	.	.	.	CGI:chr13:20721472-20722299	S_Shelf
cg18045515	0.257673	0.52024	-0.262567	3.76791e-08	9.45482e-08	chr17	79777270	79777271	CBX2;CBX2;CBX2	protein_coding;protein_coding;protein_coding	ENST00000269399.5;ENST00000310942.7;ENST00000571484.1	-925;-863;-894	CGI:chr17:79777579-79778973	N_Shore
cg09077096	0.493887	0.756059	-0.262172	2.53639e-07	4.60898e-07	chr7	2994164	2994165	CARD11;CARD11	protein_coding;protein_coding	ENST00000356408.3;ENST00000396946.7	49682;49782	CGI:chr7:3043507-3043847	.
cg07830134	0.482482	0.744627	-0.262145	1.59692e-14	5.64245e-13	chr16	1199204	1199205	CACNA1H;CACNA1H;CACNA1H	protein_coding;protein_coding;protein_coding	ENST00000348261.8;ENST00000358590.7;ENST00000565831.4	45962;45962;45465	CGI:chr16:1198853-1199446	Island
cg26068160	0.468504	0.730623	-0.262119	4.30945e-10	2.34257e-09	chr13	112241232	112241233	.	.	.	.	CGI:chr13:112241113-112241394	Island
cg26687670	0.401705	0.663588	-0.261883	1.92235e-11	1.72199e-10	chr1	241641637	241641638	OPN3;OPN3;OPN3;OPN3;OPN3	protein_coding;protein_coding;protein_coding;protein_coding;protein_coding	ENST00000366554.2;ENST00000463155.4;ENST00000469376.4;ENST00000478849.1;ENST00000490673.4	-1275;35740;-1296;-1426;-1281	CGI:chr1:241640245-241640590	S_Shore
cg05583676	0.502578	0.764029	-0.261451	2.17528e-08	5.9123e-08	chr10	130662982	130662983	.	.	.	.	CGI:chr10:130567421-130567717	.
cg06273075	0.379071	0.639005	-0.259934	5.79733e-13	1.08444e-11	chr16	14303831	14303832	MIR193B;RP11-65J21.3;RP11-65J21.3	miRNA;lincRNA;lincRNA	ENST00000384907.1;ENST00000570945.1;ENST00000571639.1	-137;1542;1325	CGI:chr16:14301747-14303218	S_Shore
cg08063051	0.305823	0.565292	-0.259469	3.90535e-19	8.27934e-17	chr16	1378705	1378706	UNKL;UNKL;UNKL;UNKL;UNKL;UNKL;UNKL;UNKL	protein_coding;protein_coding;protein_coding;protein_coding;protein_coding;protein_coding;protein_coding;protein_coding	ENST00000248104.10;ENST00000389221.7;ENST00000397464.4;ENST00000402641.5;ENST00000403703.4;ENST00000508903.5;ENST00000513783.1;ENST00000515195.1	979;36016;979;976;941;35987;417;472	CGI:chr16:1379049-1380103	N_Shore
cg14947787	0.592414	0.851675	-0.259261	5.8667e-09	1.94334e-08	chr14	64939213	64939214	CHURC1;CHURC1;CHURC1-FNTB;CHURC1-FNTB;CHURC1-FNTB;CHURC1-FNTB;GPX2;GPX2;GPX2	protein_coding;protein_coding;protein_coding;protein_coding;protein_coding;protein_coding;protein_coding;protein_coding;protein_coding	ENST00000551093.4;ENST00000551947.4;ENST00000549987.1;ENST00000551823.1;ENST00000552941.4;ENST00000553743.4;ENST00000389614.5;ENST00000553522.1;ENST00000612794.1	24735;24769;24719;15176;24727;15176;3601;3533;3693	CGI:chr14:64914357-64914664	.
cg17193961	0.471798	0.73063	-0.258832	3.26749e-07	5.85387e-07	chr17	302559	302560	RPH3AL;RPH3AL;RPH3AL;RPH3AL;RPH3AL;RPH3AL;RPH3AL;RPH3AL;RPH3AL;RPH3AL;RPH3AL;RPH3AL;RPH3AL	protein_coding;protein_coding;protein_coding;protein_coding;protein_coding;protein_coding;protein_coding;protein_coding;protein_coding;protein_coding;protein_coding;protein_coding;protein_coding	ENST00000323434.11;ENST00000331302.10;ENST00000536489.5;ENST00000570638.4;ENST00000570954.1;ENST00000573780.4;ENST00000574722.4;ENST00000574953.4;ENST00000575736.4;ENST00000576001.4;ENST00000576420.4;ENST00000577079.4;ENST00000618002.3	50539;50249;50284;36553;4123;83696;28469;24973;37101;16922;36487;50232;50284	CGI:chr17:302326-302647	Island
cg13782274	0.462531	0.720962	-0.258431	1.09705e-06	1.6935e-06	chr20	63466328	63466329	KCNQ2;KCNQ2;KCNQ2;KCNQ2;KCNQ2;KCNQ2;KCNQ2;KCNQ2;KCNQ2;KCNQ2	protein_coding;protein_coding;protein_coding;protein_coding;protein_coding;protein_coding;protein_coding;protein_coding;protein_coding;protein_coding	ENST00000344425.6;ENST00000344462.7;ENST00000359125.5;ENST00000360480.6;ENST00000370221.2;ENST00000370224.4;ENST00000625514.1;ENST00000626839.1;ENST00000629241.1;ENST00000629676.1	6313;6182;6263;6178;6262;6271;6228;6350;6228;6228	CGI:chr20:63465840-63466901	Island
cg11686819	0.384467	0.641603	-0.257136	5.01805e-07	8.55625e-07	chr5	2136966	2136967	.	.	.	.	CGI:chr5:2136683-2137191	Island
cg07299736	0.602772	0.859795	-0.257023	6.34042e-08	1.45578e-07	chr8	134478544	134478545	ZFAT;ZFAT;ZFAT;ZFAT;ZFAT;ZFAT;ZFAT;ZFAT;ZFAT;ZFAT	protein_coding;protein_coding;protein_coding;protein_coding;protein_coding;protein_coding;protein_coding;protein_coding;protein_coding;protein_coding	ENST00000377838.6;ENST00000429442.5;ENST00000518408.4;ENST00000520214.4;ENST00000520356.4;ENST00000520727.4;ENST00000521673.4;ENST00000523243.4;ENST00000523399.4;ENST00000523924.4	234495;218015;87128;218011;218011;218011;31639;234506;234419;234495	CGI:chr8:134478543-134478843	Island
cg26155983	0.524119	0.781015	-0.256896	1.51983e-10	1.00401e-09	chr14	64943427	64943428	CHURC1;CHURC1;CHURC1-FNTB;CHURC1-FNTB;CHURC1-FNTB;CHURC1-FNTB;GPX2;GPX2;GPX2;GPX2;GPX2	protein_coding;protein_coding;protein_coding;protein_coding;protein_coding;protein_coding;protein_coding;protein_coding;protein_coding;protein_coding;protein_coding	ENST00000551093.4;ENST00000551947.4;ENST00000549987.1;ENST00000551823.1;ENST00000552941.4;ENST00000553743.4;ENST00000389614.5;ENST00000553522.1;ENST00000557049.1;ENST00000557323.1;ENST00000612794.1	28949;28983;28933;19390;28941;19390;-613;-681;-706;-680;-521	CGI:chr14:64971694-64972645	.
cg09671989	0.513656	0.770504	-0.256848	3.95066e-09	1.3935e-08	chr16	88297222	88297223	LA16c-444G7.1	lincRNA	ENST00000563190.1	62436	CGI:chr16:88277100-88278947	.
cg25436245	0.543656	0.800375	-0.256719	1.26533e-11	1.31926e-10	chr17	62666644	62666645	MRC2;MRC2	protein_coding;protein_coding	ENST00000303375.8;ENST00000584265.1	39242;38958	CGI:chr17:62667146-62667518	N_Shore
cg26614816	0.159268	0.415684	-0.256416	1.01482e-11	1.1128e-10	chr12	104303754	104303755	EID3;TXNRD1;TXNRD1;TXNRD1;TXNRD1;TXNRD1;TXNRD1;TXNRD1;TXNRD1;TXNRD1;TXNRD1;TXNRD1;TXNRD1;TXNRD1;TXNRD1;TXNRD1;TXNRD1;TXNRD1;TXNRD1;TXNRD1	protein_coding;protein_coding;protein_coding;protein_coding;protein_coding;protein_coding;protein_coding;protein_coding;protein_coding;protein_coding;protein_coding;protein_coding;protein_coding;protein_coding;protein_coding;protein_coding;protein_coding;protein_coding;protein_coding;protein_coding	ENST00000527879.1;ENST00000354940.9;ENST00000388854.6;ENST00000397736.5;ENST00000429002.5;ENST00000503506.5;ENST00000524698.4;ENST00000525566.4;ENST00000526266.4;ENST00000526390.4;ENST00000526580.4;ENST00000526691.4;ENST00000527335.4;ENST00000527688.4;ENST00000528079.5;ENST00000529546.4;ENST00000529751.1;ENST00000529784.4;ENST00000531689.4;ENST00000531691.4	14;17071;17071;17071;87974;17071;16385;87974;17751;16763;16696;16872;14858;15035;16704;16731;16729;16431;16758;16828	CGI:chr12:104303570-104304206	Island
cg04505205	0.537686	0.793705	-0.256019	1.58702e-05	1.86916e-05	chr2	98388153	98388154	CNGA3;CNGA3;CNGA3;CNGA3;CNGA3	protein_coding;protein_coding;protein_coding;protein_coding;protein_coding	ENST00000272602.5;ENST00000393503.2;ENST00000393504.4;ENST00000409937.1;ENST00000436404.5	18215;8251;41997;10864;41964	CGI:chr2:98346410-98347724	.
cg14491776	0.535712	0.791081	-0.255369	4.68411e-06	6.12982e-06	*	-1	-1	.	.	.	.	.	.
cg10009968	0.597868	0.85312	-0.255252	1.52751e-07	2.98005e-07	chr7	2993774	2993775	CARD11;CARD11	protein_coding;protein_coding	ENST00000356408.3;ENST00000396946.7	50072;50172	CGI:chr7:3043507-3043847	.
cg25708982	0.35221	0.606626	-0.254416	1.91906e-09	7.6932e-09	chr13	112241117	112241118	.	.	.	.	CGI:chr13:112241113-112241394	Island
cg12632411	0.566206	0.819812	-0.253606	1.76199e-09	7.37254e-09	chr20	17614710	17614711	RRBP1;RRBP1;RRBP1;RRBP1;RRBP1;RRBP1;RRBP1;RRBP1	protein_coding;protein_coding;protein_coding;protein_coding;protein_coding;protein_coding;protein_coding;protein_coding	ENST00000246043.7;ENST00000360807.7;ENST00000377807.5;ENST00000377813.4;ENST00000455029.3;ENST00000468428.1;ENST00000470422.4;ENST00000610403.3	45798;67586;67574;67524;67351;5108;8621;45264	CGI:chr20:17614626-17614838	Island
cg14671764	0.549136	0.802351	-0.253215	1.92036e-06	2.77579e-06	chr2	1686820	1686821	PXDN;PXDN;PXDN;PXDN;PXDN	protein_coding;protein_coding;protein_coding;protein_coding;protein_coding	ENST00000252804.7;ENST00000425171.1;ENST00000433670.4;ENST00000447941.4;ENST00000485177.1	57687;57683;57623;5751;58033	CGI:chr2:1666219-1666431	.
cg02263377	0.589793	0.842795	-0.253002	4.50061e-05	4.88462e-05	chr14	104729479	104729480	ADSSL1;ADSSL1;ADSSL1;ADSSL1	protein_coding;protein_coding;protein_coding;protein_coding	ENST00000330877.5;ENST00000332972.8;ENST00000553540.4;ENST00000555486.4	5292;-256;-415;-256	CGI:chr14:104723590-104724527	.
cg16454852	0.586395	0.839058	-0.252663	6.32755e-06	8.04864e-06	chr16	3957818	3957819	ADCY9	protein_coding	ENST00000576936.4	31183	CGI:chr16:3965000-3965231	.
cg15745284	0.574998	0.827541	-0.252543	1.9131e-09	7.6932e-09	chr6	32097146	32097147	TNXB;TNXB;TNXB;TNXB	protein_coding;protein_coding;protein_coding;protein_coding	ENST00000375244.6;ENST00000479795.1;ENST00000486148.1;ENST00000613214.3	12229;12168;12076;1053	CGI:chr6:32095756-32097267	Island
cg17316718	0.455885	0.708173	-0.252288	6.04648e-08	1.40349e-07	chr17	302517	302518	RPH3AL;RPH3AL;RPH3AL;RPH3AL;RPH3AL;RPH3AL;RPH3AL;RPH3AL;RPH3AL;RPH3AL;RPH3AL;RPH3AL;RPH3AL	protein_coding;protein_coding;protein_coding;protein_coding;protein_coding;protein_coding;protein_coding;protein_coding;protein_coding;protein_coding;protein_coding;protein_coding;protein_coding	ENST00000323434.11;ENST00000331302.10;ENST00000536489.5;ENST00000570638.4;ENST00000570954.1;ENST00000573780.4;ENST00000574722.4;ENST00000574953.4;ENST00000575736.4;ENST00000576001.4;ENST00000576420.4;ENST00000577079.4;ENST00000618002.3	50581;50291;50326;36595;4165;83738;28511;25015;37143;16964;36529;50274;50326	CGI:chr17:302326-302647	Island
cg18155853	0.58739	0.839552	-0.252162	2.5064e-07	4.56754e-07	chr3	169822716	169822717	LRRIQ4	protein_coding	ENST00000340806.6	793	CGI:chr3:169812087-169812647	.
cg16252110	0.525164	0.777012	-0.251848	4.02725e-05	4.40091e-05	chr5	2866763	2866764	.	.	.	.	CGI:chr5:2866585-2866891	Island
cg05357660	0.598947	0.850772	-0.251825	2.87641e-06	3.95118e-06	chr6	105302706	105302707	PREP;RPL35P3	protein_coding;processed_pseudogene	ENST00000369110.6;ENST00000403133.1	100379;118	CGI:chr6:105402606-105403382	.
cg23519572	0.591501	0.843287	-0.251786	1.89303e-08	5.2575e-08	chr13	114043458	114043459	RASA3	protein_coding	ENST00000334062.7	89154	CGI:chr13:114043775-114044626	N_Shore
cg04020792	0.606007	0.857747	-0.25174	3.64205e-05	4.00059e-05	chr12	110340709	110340710	ATP2A2;ATP2A2;ATP2A2;ATP2A2	protein_coding;protein_coding;protein_coding;protein_coding	ENST00000308664.9;ENST00000377685.8;ENST00000539276.5;ENST00000548169.2	59592;59411;59027;48659	CGI:chr12:110280587-110282257	.
cg23230478	0.602945	0.853765	-0.25082	3.18515e-05	3.54773e-05	chr1	6300560	6300561	ACOT7;ACOT7;ACOT7;ACOT7;ACOT7;ACOT7;ACOT7;ACOT7;ACOT7	protein_coding;protein_coding;protein_coding;protein_coding;protein_coding;protein_coding;protein_coding;protein_coding;protein_coding	ENST00000361521.7;ENST00000377842.6;ENST00000377845.6;ENST00000377855.5;ENST00000377860.7;ENST00000418124.4;ENST00000473466.2;ENST00000545482.4;ENST00000608083.4	93832;58785;60148;85254;92802;92802;51690;93207;92802	CGI:chr1:6281076-6281352	.
cg03510186	0.586956	0.837744	-0.250788	4.05053e-07	7.0773e-07	chr7	155788048	155788049	.	.	.	.	CGI:chr7:155787129-155787698	S_Shore
cg07251141	0.65551	0.906044	-0.250534	1.60343e-06	2.36608e-06	chr10	126225502	126225503	ADAM12;ADAM12;ADAM12	protein_coding;protein_coding;protein_coding	ENST00000368676.7;ENST00000368679.7;ENST00000448723.1	162954;162954;162954	CGI:chr10:126387586-126388913	.
cg01736164	0.44773	0.698152	-0.250422	7.50895e-08	1.67568e-07	chr14	97457980	97457981	CTD-2506J14.1;CTD-2506J14.1;CTD-2506J14.1	lincRNA;lincRNA;lincRNA	ENST00000499910.2;ENST00000554260.1;ENST00000554862.1	-891;-852;-837	CGI:chr14:97218722-97219609	.
cg24351427	0.458847	0.709173	-0.250326	6.4418e-10	3.20077e-09	chr1	185700977	185700978	.	.	.	.	CGI:chr1:185316197-185317234	.
cg14510688	0.578026	0.827879	-0.249853	9.69719e-08	2.04219e-07	chr12	131939181	131939182	PUS1;PUS1;PUS1;PUS1;PUS1;PUS1;PUS1	protein_coding;protein_coding;protein_coding;protein_coding;protein_coding;protein_coding;protein_coding	ENST00000322060.8;ENST00000376649.6;ENST00000443358.5;ENST00000535067.4;ENST00000537484.1;ENST00000538037.4;ENST00000542167.2	9938;9957;9980;9425;9415;9898;9904	CGI:chr12:131944983-131945194	.
cg21163347	0.557717	0.807499	-0.249782	3.63839e-05	4.00059e-05	chr5	1394518	1394519	SLC6A3;SLC6A3	protein_coding;protein_coding	ENST00000270349.11;ENST00000512002.2	50913;6790	CGI:chr5:1385863-1386747	.
cg01021196	0.492394	0.742115	-0.249721	8.62127e-07	1.36736e-06	chr14	37870959	37870960	TTC6	protein_coding	ENST00000533625.4	259707	CGI:chr14:37622234-37622971	.
cg10946576	0.500091	0.749266	-0.249175	1.37721e-07	2.7202e-07	chr20	63448446	63448447	KCNQ2;KCNQ2;KCNQ2;KCNQ2;KCNQ2;KCNQ2;KCNQ2;KCNQ2;KCNQ2;KCNQ2;KCNQ2;RP11-358D14.2	protein_coding;protein_coding;protein_coding;protein_coding;protein_coding;protein_coding;protein_coding;protein_coding;protein_coding;protein_coding;protein_coding;antisense	ENST00000344425.6;ENST00000344462.7;ENST00000359125.5;ENST00000360480.6;ENST00000370221.2;ENST00000370224.4;ENST00000625514.1;ENST00000626313.1;ENST00000626839.1;ENST00000629241.1;ENST00000629676.1;ENST00000436263.1	24195;24064;24145;24060;24144;24153;24110;11603;24232;24110;24110;394	CGI:chr20:63448262-63448559	Island
cg05006473	0.555798	0.804664	-0.248866	3.25327e-06	4.4023e-06	chr4	1502754	1502755	.	.	.	.	CGI:chr4:1503527-1503833	N_Shore
cg08822897	0.393178	0.641995	-0.248817	7.13357e-09	2.31477e-08	chr11	64490631	64490632	.	.	.	.	CGI:chr11:64448939-64449237	.
cg10857729	0.393102	0.641451	-0.248349	3.06952e-09	1.16899e-08	*	-1	-1	.	.	.	.	.	.
cg15737177	0.468183	0.716446	-0.248263	5.0005e-08	1.18227e-07	chr12	8564871	8564872	RP11-561P12.5	lincRNA	ENST00000542819.1	2743	CGI:chr12:8605154-8605483	.
cg26859593	0.580977	0.829045	-0.248068	1.57361e-06	2.3329e-06	chr13	112342218	112342219	.	.	.	.	CGI:chr13:112342878-112343403	N_Shore
cg16783478	0.570077	0.817567	-0.24749	1.79627e-06	2.62025e-06	chr16	9849800	9849801	GRIN2A;GRIN2A;GRIN2A;GRIN2A;GRIN2A;GRIN2A	protein_coding;protein_coding;protein_coding;protein_coding;protein_coding;protein_coding	ENST00000330684.3;ENST00000396573.5;ENST00000396575.5;ENST00000461292.2;ENST00000535259.4;ENST00000562109.4	332607;332955;88755;120996;88759;332088	CGI:chr16:10180086-10183567	.
cg04837438	0.461125	0.708351	-0.247226	1.40338e-08	4.13217e-08	chr2	94737318	94737319	AC073464.4;CNN2P8	processed_pseudogene;processed_pseudogene	ENST00000424978.2;ENST00000421872.1	-1473;-20	CGI:chr2:94735635-94735891	S_Shore
cg27416863	0.50354	0.750754	-0.247214	2.05976e-06	2.95047e-06	chr7	1331091	1331092	.	.	.	.	CGI:chr7:1323175-1324007	.
cg14239111	0.596423	0.843464	-0.247041	2.5052e-05	2.85539e-05	chr9	135769152	135769153	KCNT1;KCNT1;KCNT1;KCNT1;KCNT1;KCNT1;KCNT1;KCNT1;KCNT1;KCNT1;KCNT1;KCNT1	protein_coding;protein_coding;protein_coding;protein_coding;protein_coding;protein_coding;protein_coding;protein_coding;protein_coding;protein_coding;protein_coding;protein_coding	ENST00000263604.4;ENST00000371757.5;ENST00000460750.4;ENST00000486577.5;ENST00000487664.4;ENST00000488444.5;ENST00000490355.5;ENST00000490363.2;ENST00000491806.5;ENST00000628528.1;ENST00000630792.1;ENST00000631073.1	32634;66959;66938;54631;66966;32521;32518;15400;32536;66966;54525;32526	CGI:chr9:135768651-135769378	Island
cg18747742	0.406896	0.653791	-0.246895	1.90405e-07	3.54086e-07	chr6	19180520	19180521	.	.	.	.	CGI:chr6:19691679-19692074	.
cg04806177	0.536781	0.783586	-0.246805	1.35839e-06	2.03706e-06	chr16	1941446	1941447	MSRB1;MSRB1;MSRB1;MSRB1;MSRB1;MSRB1	protein_coding;protein_coding;protein_coding;protein_coding;protein_coding;protein_coding	ENST00000361871.6;ENST00000399753.2;ENST00000473663.1;ENST00000489198.1;ENST00000564908.1;ENST00000622125.3	1881;1750;1678;494;1754;1848	CGI:chr16:1942667-1943645	N_Shore
cg11862144	0.396342	0.643043	-0.246701	1.71897e-10	1.08244e-09	chr18	63476728	63476729	SERPINB5;SERPINB5;SERPINB5	protein_coding;protein_coding;protein_coding	ENST00000382771.7;ENST00000424602.1;ENST00000489441.4	-34;-400;-231	CGI:chr18:63422029-63423124	.
cg13943068	0.384003	0.630423	-0.24642	1.47784e-05	1.75356e-05	chr4	1578466	1578467	RP11-1398P2.1	lincRNA	ENST00000466692.1	1788	CGI:chr4:1578323-1578728	Island
cg06070002	0.451666	0.698041	-0.246375	6.0868e-12	7.44462e-11	chr1	45520448	45520449	PRDX1;PRDX1;PRDX1;PRDX1;PRDX1;PRDX1	protein_coding;protein_coding;protein_coding;protein_coding;protein_coding;protein_coding	ENST00000262746.4;ENST00000319248.11;ENST00000372079.1;ENST00000424390.1;ENST00000447184.4;ENST00000483583.1	1491;1509;1407;2600;1491;1420	CGI:chr1:45521491-45522131	N_Shore
cg10510159	0.559906	0.806273	-0.246367	6.78627e-06	8.58882e-06	chr16	48347689	48347690	LONP2;LONP2;LONP2;LONP2;LONP2	protein_coding;protein_coding;protein_coding;protein_coding;protein_coding	ENST00000285737.7;ENST00000535754.4;ENST00000564259.1;ENST00000565867.2;ENST00000566755.4	103392;103355;-408;13376;103300	CGI:chr16:48365819-48366129	.
cg18049513	0.62702	0.873253	-0.246233	4.10442e-07	7.15181e-07	chr11	541660	541661	LRRC56	protein_coding	ENST00000270115.7	4132	CGI:chr11:541896-542227	N_Shore
cg10421718	0.452132	0.698126	-0.245994	2.90173e-10	1.72477e-09	chr13	112252397	112252398	.	.	.	.	CGI:chr13:112241113-112241394	.
cg27097992	0.534558	0.780449	-0.245891	4.86726e-06	6.3434e-06	chr14	104334613	104334614	.	.	.	.	CGI:chr14:104334107-104334640	Island
cg16490191	0.44664	0.692512	-0.245872	8.57135e-15	3.63425e-13	chr16	1378638	1378639	UNKL;UNKL;UNKL;UNKL;UNKL;UNKL;UNKL;UNKL	protein_coding;protein_coding;protein_coding;protein_coding;protein_coding;protein_coding;protein_coding;protein_coding	ENST00000248104.10;ENST00000389221.7;ENST00000397464.4;ENST00000402641.5;ENST00000403703.4;ENST00000508903.5;ENST00000513783.1;ENST00000515195.1	1046;36083;1046;1043;1008;36054;484;539	CGI:chr16:1379049-1380103	N_Shore
cg16088116	0.569617	0.815382	-0.245765	4.45336e-07	7.69657e-07	*	-1	-1	.	.	.	.	.	.
cg11409350	0.557082	0.802656	-0.245574	1.84264e-09	7.60986e-09	chr17	75130404	75130405	NT5C;NT5C;NT5C;NT5C;NT5C;NT5C;NT5C;NT5C;RP11-649A18.3	protein_coding;protein_coding;protein_coding;protein_coding;protein_coding;protein_coding;protein_coding;protein_coding;TEC	ENST00000245552.5;ENST00000577523.4;ENST00000578407.4;ENST00000580423.4;ENST00000580758.4;ENST00000582160.4;ENST00000582744.4;ENST00000583655.4;ENST00000625094.1	1392;1022;1280;855;1340;1043;1070;1346;-480	CGI:chr17:75131101-75131900	N_Shore
cg00844246	0.599773	0.845322	-0.245549	2.10852e-09	8.32931e-09	chr10	133114551	133114552	GPR123;GPR123;GPR123	protein_coding;protein_coding;protein_coding	ENST00000392606.2;ENST00000392607.6;ENST00000607359.4	12304;26645;43621	CGI:chr10:133112311-133113374	S_Shore
cg01729116	0.476582	0.722084	-0.245502	0.000190768	0.000195376	chr16	89188316	89188317	CDH15	protein_coding	ENST00000289746.2	16548	CGI:chr16:89191344-89193223	N_Shelf
cg20090561	0.545152	0.790336	-0.245184	3.88646e-08	9.50688e-08	chr3	185986479	185986480	.	.	.	.	CGI:chr3:185937268-185938241	.
cg06125461	0.370196	0.614716	-0.24452	4.65098e-07	7.97311e-07	chr16	65064949	65064950	CDH11;CDH11;CDH11;CDH11;CDH11;CDH11;CDH11;CDH11;CDH11;CDH11;CDH11;CDH11;CDH11	protein_coding;protein_coding;protein_coding;protein_coding;protein_coding;protein_coding;protein_coding;protein_coding;protein_coding;protein_coding;protein_coding;protein_coding;protein_coding	ENST00000268603.7;ENST00000394156.6;ENST00000562325.4;ENST00000562882.4;ENST00000562998.1;ENST00000563255.1;ENST00000563492.1;ENST00000564317.4;ENST00000565210.4;ENST00000566827.4;ENST00000567934.4;ENST00000568340.4;ENST00000569624.4	57250;57088;57144;7265;57117;59240;61164;57417;57098;56982;7312;59338;59344	CGI:chr16:65120753-65123761	.
cg26956157	0.605448	0.849954	-0.244506	5.03495e-06	6.54852e-06	chr16	88970290	88970291	CBFA2T3;CBFA2T3	protein_coding;protein_coding	ENST00000268679.7;ENST00000563640.1	6915;6791	CGI:chr16:88967652-88967885	S_Shelf
cg01510696	0.60499	0.849363	-0.244373	1.12766e-05	1.36307e-05	chr16	89621737	89621738	DPEP1;DPEP1;DPEP1;DPEP1;DPEP1;DPEP1	protein_coding;protein_coding;protein_coding;protein_coding;protein_coding;protein_coding	ENST00000393092.6;ENST00000421184.4;ENST00000564281.4;ENST00000565249.4;ENST00000568281.4;ENST00000570029.4	1144;8428;8063;8187;4863;8428	CGI:chr16:89647503-89648442	.
cg13345122	0.47278	0.716773	-0.243993	3.14732e-10	1.81972e-09	chr2	168056375	168056376	STK39;STK39	protein_coding;protein_coding	ENST00000355999.4;ENST00000487143.4	191767;56732	CGI:chr2:168246440-168247944	.
cg17600630	0.419333	0.662809	-0.243476	1.31165e-09	5.67489e-09	chr2	143295849	143295850	AC096558.1;ARHGAP15;ARHGAP15;ARHGAP15;ARHGAP15;ARHGAP15;RP11-570L15.2	antisense;protein_coding;protein_coding;protein_coding;protein_coding;protein_coding;antisense	ENST00000549032.4;ENST00000295095.9;ENST00000460776.4;ENST00000469117.4;ENST00000474474.4;ENST00000552641.4;ENST00000546678.1	184941;166534;102464;48558;67750;166435;276257	CGI:chr2:143936763-143937613	.
cg08603125	0.562538	0.806006	-0.243468	4.405e-09	1.53092e-08	chr6	35922420	35922421	SRPK1;SRPK1;SRPK1;SRPK1;SRPK1;SRPK1;SRPK1;SRPK1;SRPK1;SRPK1	protein_coding;protein_coding;protein_coding;protein_coding;protein_coding;protein_coding;protein_coding;protein_coding;protein_coding;protein_coding	ENST00000346162.9;ENST00000361690.6;ENST00000373822.4;ENST00000373825.5;ENST00000423325.5;ENST00000507909.1;ENST00000508473.4;ENST00000510290.4;ENST00000512445.4;ENST00000513367.1	-1354;-1372;-1354;-1077;-1272;-1324;-1077;-1291;-1347;-1318	CGI:chr6:35920607-35921283	S_Shore
cg16452248	0.551657	0.794787	-0.24313	1.64206e-09	6.94723e-09	chr16	563526	563527	PRR35	protein_coding	ENST00000409413.3	3103	CGI:chr16:564792-565095	N_Shore
cg26317006	0.561436	0.804468	-0.243032	2.6946e-05	3.04908e-05	chr2	239506596	239506597	.	.	.	.	CGI:chr2:239527380-239528070	.
cg09884423	0.337784	0.580804	-0.24302	1.3258e-11	1.33843e-10	chr12	104303442	104303443	EID3;TXNRD1;TXNRD1;TXNRD1;TXNRD1;TXNRD1;TXNRD1;TXNRD1;TXNRD1;TXNRD1;TXNRD1;TXNRD1;TXNRD1;TXNRD1;TXNRD1;TXNRD1;TXNRD1;TXNRD1;TXNRD1;TXNRD1	protein_coding;protein_coding;protein_coding;protein_coding;protein_coding;protein_coding;protein_coding;protein_coding;protein_coding;protein_coding;protein_coding;protein_coding;protein_coding;protein_coding;protein_coding;protein_coding;protein_coding;protein_coding;protein_coding;protein_coding	ENST00000527879.1;ENST00000354940.9;ENST00000388854.6;ENST00000397736.5;ENST00000429002.5;ENST00000503506.5;ENST00000524698.4;ENST00000525566.4;ENST00000526266.4;ENST00000526390.4;ENST00000526580.4;ENST00000526691.4;ENST00000527335.4;ENST00000527688.4;ENST00000528079.5;ENST00000529546.4;ENST00000529751.1;ENST00000529784.4;ENST00000531689.4;ENST00000531691.4	-298;16759;16759;16759;87662;16759;16073;87662;17439;16451;16384;16560;14546;14723;16392;16419;16417;16119;16446;16516	CGI:chr12:104303570-104304206	N_Shore
cg14591667	0.414418	0.657383	-0.242965	6.15501e-07	1.02209e-06	chr17	49133460	49133461	B4GALNT2;B4GALNT2;B4GALNT2	protein_coding;protein_coding;protein_coding	ENST00000300404.2;ENST00000393354.5;ENST00000504681.4	492;690;999	CGI:chr17:49132449-49133378	S_Shore
cg24820672	0.346025	0.588917	-0.242892	9.70871e-10	4.47445e-09	chr13	112330414	112330415	LINC01044	lincRNA	ENST00000413637.1	812	CGI:chr13:112330652-112331419	N_Shore
cg08911237	0.58322	0.825954	-0.242734	2.05355e-09	8.16286e-09	chr12	104356640	104356641	.	.	.	.	CGI:chr12:104303570-104304206	.
cg01178099	0.417617	0.660022	-0.242405	4.632e-11	3.72905e-10	chr3	177673599	177673600	LINC00578;LINC00578;LINC00578	lincRNA;lincRNA;lincRNA	ENST00000439009.1;ENST00000442937.4;ENST00000445673.1	231634;231677;56008	CGI:chr3:177196449-177198066	.
cg17301987	0.457153	0.69891	-0.241757	1.58994e-10	1.02902e-09	chr6	5752434	5752435	FARS2;FARS2	protein_coding;protein_coding	ENST00000274680.7;ENST00000324331.9	490907;491389	CGI:chr6:5851377-5851608	.
cg10295858	0.553785	0.795183	-0.241398	1.92734e-07	3.56334e-07	chr16	361352	361353	.	.	.	.	CGI:chr16:359984-361491	Island
cg06581491	0.535235	0.776577	-0.241342	2.0894e-10	1.27775e-09	chr10	132917012	132917013	CFAP46;CFAP46	protein_coding;protein_coding	ENST00000368586.8;ENST00000486104.4	25574;-329	CGI:chr10:132916294-132916518	S_Shore
cg19502457	0.466805	0.707746	-0.240941	1.17304e-14	4.38855e-13	chr14	64942636	64942637	CHURC1;CHURC1;CHURC1-FNTB;CHURC1-FNTB;CHURC1-FNTB;CHURC1-FNTB;GPX2;GPX2;GPX2;GPX2;GPX2	protein_coding;protein_coding;protein_coding;protein_coding;protein_coding;protein_coding;protein_coding;protein_coding;protein_coding;protein_coding;protein_coding	ENST00000551093.4;ENST00000551947.4;ENST00000549987.1;ENST00000551823.1;ENST00000552941.4;ENST00000553743.4;ENST00000389614.5;ENST00000553522.1;ENST00000557049.1;ENST00000557323.1;ENST00000612794.1	28158;28192;28142;18599;28150;18599;178;110;85;111;270	CGI:chr14:64914357-64914664	.
cg26121591	0.220256	0.461126	-0.24087	1.05689e-06	1.63548e-06	chr5	175871561	175871562	CPLX2;CPLX2;CPLX2;CPLX2;CPLX2;CPLX2;CPLX2	protein_coding;protein_coding;protein_coding;protein_coding;protein_coding;protein_coding;protein_coding	ENST00000359546.7;ENST00000393745.6;ENST00000502265.4;ENST00000509837.4;ENST00000512824.4;ENST00000514150.4;ENST00000515502.1	75250;62;-1250;9932;-18;-116;74818	CGI:chr5:175871512-175872622	Island
cg04018325	0.392987	0.633651	-0.240664	1.5454e-13	3.38922e-12	chr16	14303828	14303829	MIR193B;RP11-65J21.3;RP11-65J21.3	miRNA;lincRNA;lincRNA	ENST00000384907.1;ENST00000570945.1;ENST00000571639.1	-140;1539;1322	CGI:chr16:14301747-14303218	S_Shore
cg14715697	0.424378	0.664967	-0.240589	1.62395e-05	1.90559e-05	chr17	79131405	79131406	RBFOX3;RBFOX3;RBFOX3;RBFOX3;RBFOX3;RBFOX3;RP11-398J5.1	protein_coding;protein_coding;protein_coding;protein_coding;protein_coding;protein_coding;antisense	ENST00000580155.4;ENST00000580508.1;ENST00000582043.4;ENST00000582139.1;ENST00000583458.4;ENST00000584778.4;ENST00000583980.1	384744;52068;104401;77152;351194;377464;-1318	CGI:chr17:79131323-79131524	Island
cg25225379	0.422287	0.662866	-0.240579	2.13675e-07	3.90509e-07	chr8	142427902	142427903	.	.	.	.	CGI:chr8:142428011-142428269	N_Shore
cg01963754	0.514315	0.754175	-0.23986	1.12265e-05	1.36001e-05	chr13	111324901	111324902	TEX29;TEX29	protein_coding;protein_coding	ENST00000283547.1;ENST00000497241.4	4232;8716	CGI:chr13:111326241-111326752	N_Shore
cg02731193	0.537823	0.777572	-0.239749	5.14118e-10	2.68016e-09	chr6	53542388	53542389	GCLC;GCLC;GCLC;GCLC;GCLC;GCLC	protein_coding;protein_coding;protein_coding;protein_coding;protein_coding;protein_coding	ENST00000229416.9;ENST00000504525.1;ENST00000505197.1;ENST00000513939.4;ENST00000514004.4;ENST00000616923.3	2742;2701;74583;2221;2646;2742	CGI:chr6:53544322-53545301	N_Shore
cg07052524	0.446324	0.685713	-0.239389	2.04284e-08	5.6002e-08	chr19	39519195	39519196	SELV;SELV;SELV;SELV	protein_coding;protein_coding;protein_coding;protein_coding	ENST00000335426.7;ENST00000423711.3;ENST00000600586.1;ENST00000622070.2	4081;4081;3380;4081	CGI:chr19:39515008-39515986	S_Shelf
cg26120093	0.537624	0.776655	-0.239031	1.49816e-11	1.46455e-10	chr14	104134213	104134214	.	.	.	.	CGI:chr14:104135622-104139335	N_Shore
cg19509829	0.621959	0.860982	-0.239023	1.64055e-05	1.92153e-05	chr12	110340860	110340861	ATP2A2;ATP2A2;ATP2A2;ATP2A2	protein_coding;protein_coding;protein_coding;protein_coding	ENST00000308664.9;ENST00000377685.8;ENST00000539276.5;ENST00000548169.2	59743;59562;59178;48810	CGI:chr12:110280587-110282257	.
cg24258712	0.487861	0.726593	-0.238732	7.05237e-06	8.8818e-06	chr8	143155108	143155109	.	.	.	.	CGI:chr8:143159441-143160696	.
cg19722698	0.241713	0.480346	-0.238633	1.0619e-19	3.37684e-17	chr12	104300152	104300153	TXNRD1;TXNRD1;TXNRD1;TXNRD1;TXNRD1;TXNRD1;TXNRD1;TXNRD1;TXNRD1;TXNRD1;TXNRD1;TXNRD1;TXNRD1;TXNRD1;TXNRD1;TXNRD1;TXNRD1;TXNRD1;TXNRD1	protein_coding;protein_coding;protein_coding;protein_coding;protein_coding;protein_coding;protein_coding;protein_coding;protein_coding;protein_coding;protein_coding;protein_coding;protein_coding;protein_coding;protein_coding;protein_coding;protein_coding;protein_coding;protein_coding	ENST00000354940.9;ENST00000388854.6;ENST00000397736.5;ENST00000429002.5;ENST00000503506.5;ENST00000524698.4;ENST00000525566.4;ENST00000526266.4;ENST00000526390.4;ENST00000526580.4;ENST00000526691.4;ENST00000527335.4;ENST00000527688.4;ENST00000528079.5;ENST00000529546.4;ENST00000529751.1;ENST00000529784.4;ENST00000531689.4;ENST00000531691.4	13469;13469;13469;84372;13469;12783;84372;14149;13161;13094;13270;11256;11433;13102;13129;13127;12829;13156;13226	CGI:chr12:104303570-104304206	N_Shelf
cg22471075	0.354659	0.593081	-0.238422	3.04207e-08	7.89697e-08	chr22	49369326	49369327	.	.	.	.	CGI:chr22:49369092-49369369	Island
cg20466478	0.460746	0.698865	-0.238119	3.82756e-08	9.50675e-08	chr8	37851091	37851092	BRF2;BRF2;BRF2;BRF2	protein_coding;protein_coding;protein_coding;protein_coding	ENST00000220659.9;ENST00000520601.4;ENST00000521170.4;ENST00000522539.1	-1186;-1252;-1229;-1236	CGI:chr8:37849631-37849989	S_Shore
cg07364009	0.631566	0.8693	-0.237734	2.4834e-06	3.46369e-06	chr16	48347594	48347595	LONP2;LONP2;LONP2;LONP2;LONP2;LONP2	protein_coding;protein_coding;protein_coding;protein_coding;protein_coding;protein_coding	ENST00000285737.7;ENST00000416006.6;ENST00000535754.4;ENST00000564259.1;ENST00000565867.2;ENST00000566755.4	103297;103238;103260;-503;13281;103205	CGI:chr16:48365819-48366129	.
cg26923862	0.603273	0.840982	-0.237709	1.11641e-07	2.26849e-07	chr16	991256	991257	RP11-161M6.3	lincRNA	ENST00000599946.2	9671	CGI:chr16:990965-991365	Island
cg05229598	0.541202	0.778348	-0.237146	5.49962e-11	4.21417e-10	chr12	132215378	132215379	GALNT9;GALNT9	protein_coding;protein_coding	ENST00000328957.11;ENST00000411988.5	113826;42365	CGI:chr12:132212116-132213179	S_Shelf
cg22747501	0.333643	0.570719	-0.237076	2.44116e-12	3.45017e-11	chr7	29193860	29193861	CHN2;CHN2;CHN2;CHN2;CHN2;CHN2;CHN2;CHN2;CPVL;CPVL;CPVL;CPVL;CPVL	protein_coding;protein_coding;protein_coding;protein_coding;protein_coding;protein_coding;protein_coding;protein_coding;protein_coding;protein_coding;protein_coding;protein_coding;protein_coding	ENST00000222792.9;ENST00000409350.4;ENST00000435288.5;ENST00000439384.4;ENST00000474070.4;ENST00000495789.5;ENST00000539389.4;ENST00000539406.4;ENST00000409850.4;ENST00000437527.1;ENST00000449801.4;ENST00000455544.4;ENST00000488891.5	-553;-1066;-646;47290;47262;-1083;-1083;-1083;1417;1588;1327;1592;1377	CGI:chr7:29194355-29195430	N_Shore
cg13157793	0.515984	0.752401	-0.236417	1.07882e-09	4.79811e-09	chr15	24675303	24675304	NPAP1	protein_coding	ENST00000329468.3	-566	CGI:chr15:24675466-24676105	N_Shore
cg27297441	0.291503	0.527657	-0.236154	4.55741e-08	1.08967e-07	chr10	133105167	133105168	GPR123;GPR123;GPR123	protein_coding;protein_coding;protein_coding	ENST00000392606.2;ENST00000392607.6;ENST00000607359.4	2920;17261;34237	CGI:chr10:133105251-133105471	N_Shore
cg13801740	0.561005	0.796914	-0.235909	7.66478e-08	1.70448e-07	chr9	137480011	137480012	PNPLA7;PNPLA7;PNPLA7;PNPLA7	protein_coding;protein_coding;protein_coding;protein_coding	ENST00000277531.7;ENST00000406427.4;ENST00000469998.1;ENST00000492278.4	70374;70524;717;-579	CGI:chr9:137480914-137481129	N_Shore
cg18484212	0.64487	0.880275	-0.235405	4.11705e-11	3.40058e-10	chr20	650817	650818	RP5-850E9.3;SRXN1	protein_coding;protein_coding	ENST00000488788.2;ENST00000381962.3	24984;2554	CGI:chr20:652897-653462	N_Shelf
cg13889620	0.570889	0.806279	-0.23539	3.30001e-09	1.19932e-08	chr12	121654295	121654296	MORN3;MORN3;MORN3	protein_coding;protein_coding;protein_coding	ENST00000355329.6;ENST00000392462.5;ENST00000542364.1	15360;15356;18337	CGI:chr12:121626271-121627236	.
cg21617357	0.51275	0.748034	-0.235284	1.25292e-12	1.94355e-11	chr11	20367506	20367507	HTATIP2;HTATIP2;HTATIP2;HTATIP2;HTATIP2;HTATIP2;HTATIP2;HTATIP2	protein_coding;protein_coding;protein_coding;protein_coding;protein_coding;protein_coding;protein_coding;protein_coding	ENST00000419348.5;ENST00000421577.5;ENST00000443524.5;ENST00000451739.5;ENST00000530266.4;ENST00000531058.1;ENST00000532081.1;ENST00000532505.1	3762;3782;3780;3708;3820;3325;3364;3651	CGI:chr11:20363615-20364127	S_Shelf
cg27019731	0.501422	0.736605	-0.235183	1.29414e-08	3.84614e-08	chr10	132987158	132987159	.	.	.	.	CGI:chr10:132990717-132990944	N_Shelf
cg15899738	0.528282	0.763379	-0.235097	2.79368e-08	7.37253e-08	chr7	2993945	2993946	CARD11;CARD11	protein_coding;protein_coding	ENST00000356408.3;ENST00000396946.7	49901;50001	CGI:chr7:3043507-3043847	.
cg01233518	0.625887	0.860577	-0.23469	4.58373e-08	1.09185e-07	*	-1	-1	.	.	.	.	.	.
cg18756557	0.535552	0.770148	-0.234596	9.81468e-08	2.06011e-07	chr12	1500203	1500204	.	.	.	.	CGI:chr12:1529867-1531584	.
cg06411129	0.587084	0.821514	-0.23443	1.23306e-09	5.37141e-09	chr12	132210847	132210848	GALNT9;GALNT9	protein_coding;protein_coding	ENST00000328957.11;ENST00000411988.5	118357;46896	CGI:chr12:132212116-132213179	N_Shore
cg26840068	0.404519	0.638781	-0.234262	5.56997e-12	7.085e-11	chr1	248323865	248323866	OR2M7	protein_coding	ENST00000317965.3	704	CGI:chr1:248691729-248692169	.
cg03777414	0.494992	0.729253	-0.234261	2.2034e-06	3.11414e-06	chr16	10775117	10775118	TVP23A;TVP23A;TVP23A;TVP23A;TVP23A;TVP23A;TVP23A;TVP23A;TVP23A;TVP23A	protein_coding;protein_coding;protein_coding;protein_coding;protein_coding;protein_coding;protein_coding;protein_coding;protein_coding;protein_coding	ENST00000299866.11;ENST00000456096.5;ENST00000570692.1;ENST00000572428.4;ENST00000572980.4;ENST00000573360.4;ENST00000573857.4;ENST00000575135.4;ENST00000612195.3;ENST00000619408.1	43669;43484;43678;-120;43491;43535;43484;43484;43484;-85	CGI:chr16:10743727-10744339	.
cg23429698	0.362798	0.597016	-0.234218	7.06258e-10	3.48202e-09	chr8	97865941	97865942	.	.	.	.	CGI:chr8:97868809-97869615	N_Shelf
cg06700060	0.424521	0.658481	-0.23396	5.83193e-09	1.94194e-08	chr12	65465867	65465868	MSRB3;MSRB3;MSRB3;MSRB3;MSRB3	protein_coding;protein_coding;protein_coding;protein_coding;protein_coding	ENST00000308259.8;ENST00000355192.6;ENST00000446731.2;ENST00000541189.4;ENST00000614640.3	187223;187223;138991;187122;186879	CGI:chr12:65278606-65279470	.
cg12072262	0.487084	0.721044	-0.23396	4.12068e-05	4.49529e-05	chr10	127581089	127581090	.	.	.	.	CGI:chr10:127736146-127739102	.
cg12813108	0.534007	0.767811	-0.233804	1.4006e-10	9.4764e-10	chr7	100122289	100122290	CNPY4;CNPY4;CNPY4;CNPY4;RP11-506M12.1	protein_coding;protein_coding;protein_coding;protein_coding;antisense	ENST00000262932.3;ENST00000462193.1;ENST00000480692.4;ENST00000483756.4;ENST00000494221.1	2675;29;236;2262;4851	CGI:chr7:100126859-100128185	.
cg21918728	0.680445	0.914195	-0.23375	6.26902e-09	2.0552e-08	chr22	29049723	29049724	ZNRF3;ZNRF3;ZNRF3;chr22-38_28785274-29006793.1	protein_coding;protein_coding;protein_coding;lincRNA	ENST00000402174.4;ENST00000406323.3;ENST00000544604.5;ENST00000623644.1	132333;62670;166130;119521	CGI:chr22:29049650-29050125	Island
cg23081534	0.624352	0.857918	-0.233566	5.67226e-06	7.28799e-06	chr3	169822291	169822292	LRRIQ4	protein_coding	ENST00000340806.6	368	CGI:chr3:169812087-169812647	.
cg07068756	0.0566691	0.29019	-0.233521	1.2767e-25	8.11981e-23	chr4	41256893	41256894	UCHL1;UCHL1;UCHL1;UCHL1;UCHL1;UCHL1;UCHL1;UCHL1;UCHL1;UCHL1;UCHL1-AS1;UCHL1-AS1	protein_coding;protein_coding;protein_coding;protein_coding;protein_coding;protein_coding;protein_coding;protein_coding;protein_coding;protein_coding;antisense;antisense	ENST00000284440.7;ENST00000381760.7;ENST00000472501.4;ENST00000503431.4;ENST00000504818.4;ENST00000505232.4;ENST00000508768.4;ENST00000512419.4;ENST00000512788.1;ENST00000514924.4;ENST00000507190.1;ENST00000510073.1	59;-16;-54;123;-41;-40;-48;-19;-53;479;-165;-171	CGI:chr4:41256742-41257850	Island
cg23248887	0.318529	0.552024	-0.233495	1.27573e-06	1.94106e-06	chr14	38210438	38210439	SSTR1	protein_coding	ENST00000267377.2	2438	CGI:chr14:38209040-38211732	Island
cg03564727	0.404561	0.638023	-0.233462	6.65625e-11	4.92253e-10	chr19	49073949	49073950	KCNA7	protein_coding	ENST00000221444.1	-1007	CGI:chr19:49071872-49072959	S_Shore
cg00212114	0.516273	0.749722	-0.233449	3.12175e-10	1.81972e-09	chr11	117273998	117273999	RNF214;RNF214;RNF214;RNF214	protein_coding;protein_coding;protein_coding;protein_coding	ENST00000300650.7;ENST00000530849.1;ENST00000531287.4;ENST00000531452.4	41372;39734;41261;41261	CGI:chr11:117233009-117233225	.
cg20431748	0.402366	0.635674	-0.233308	8.03886e-13	1.36154e-11	chr1	179586864	179586865	RP11-545A16.3	processed_pseudogene	ENST00000427215.2	158	CGI:chr1:179586229-179586915	Island
cg16678111	0.408649	0.64189	-0.233241	1.50439e-10	1.00401e-09	chr1	3002160	3002161	.	.	.	.	CGI:chr1:3001801-3002189	Island
cg01857475	0.104448	0.337274	-0.232826	3.72073e-13	7.39495e-12	chr12	104303415	104303416	EID3;TXNRD1;TXNRD1;TXNRD1;TXNRD1;TXNRD1;TXNRD1;TXNRD1;TXNRD1;TXNRD1;TXNRD1;TXNRD1;TXNRD1;TXNRD1;TXNRD1;TXNRD1;TXNRD1;TXNRD1;TXNRD1;TXNRD1	protein_coding;protein_coding;protein_coding;protein_coding;protein_coding;protein_coding;protein_coding;protein_coding;protein_coding;protein_coding;protein_coding;protein_coding;protein_coding;protein_coding;protein_coding;protein_coding;protein_coding;protein_coding;protein_coding;protein_coding	ENST00000527879.1;ENST00000354940.9;ENST00000388854.6;ENST00000397736.5;ENST00000429002.5;ENST00000503506.5;ENST00000524698.4;ENST00000525566.4;ENST00000526266.4;ENST00000526390.4;ENST00000526580.4;ENST00000526691.4;ENST00000527335.4;ENST00000527688.4;ENST00000528079.5;ENST00000529546.4;ENST00000529751.1;ENST00000529784.4;ENST00000531689.4;ENST00000531691.4	-325;16732;16732;16732;87635;16732;16046;87635;17412;16424;16357;16533;14519;14696;16365;16392;16390;16092;16419;16489	CGI:chr12:104303570-104304206	N_Shore
cg19641266	0.657296	0.889856	-0.23256	5.79284e-07	9.64462e-07	chr12	131939092	131939093	PUS1;PUS1;PUS1;PUS1;PUS1;PUS1;PUS1	protein_coding;protein_coding;protein_coding;protein_coding;protein_coding;protein_coding;protein_coding	ENST00000322060.8;ENST00000376649.6;ENST00000443358.5;ENST00000535067.4;ENST00000537484.1;ENST00000538037.4;ENST00000542167.2	9849;9868;9891;9336;9326;9809;9815	CGI:chr12:131944983-131945194	.
cg19244553	0.512409	0.744867	-0.232458	8.74764e-09	2.78175e-08	chr7	2437352	2437353	CHST12;CHST12	protein_coding;protein_coding	ENST00000258711.7;ENST00000313156.3	33763;-412	CGI:chr7:2432610-2433932	S_Shelf
cg05192145	0.581874	0.814219	-0.232345	1.17394e-10	8.1155e-10	chr16	30821025	30821026	RP11-2C24.7	lincRNA	ENST00000621583.1	-314	CGI:chr16:30820965-30821239	Island
cg14492599	0.492947	0.725243	-0.232296	1.88177e-07	3.50969e-07	chr17	79178208	79178209	RBFOX3;RBFOX3;RBFOX3;RBFOX3;RBFOX3;RBFOX3	protein_coding;protein_coding;protein_coding;protein_coding;protein_coding;protein_coding	ENST00000580155.4;ENST00000580508.1;ENST00000582043.4;ENST00000582139.1;ENST00000583458.4;ENST00000584778.4	337941;5265;57598;30349;304391;330661	CGI:chr17:79182746-79184147	.
cg14602220	0.458395	0.690398	-0.232003	1.68886e-07	3.21591e-07	chr17	79178038	79178039	RBFOX3;RBFOX3;RBFOX3;RBFOX3;RBFOX3;RBFOX3	protein_coding;protein_coding;protein_coding;protein_coding;protein_coding;protein_coding	ENST00000580155.4;ENST00000580508.1;ENST00000582043.4;ENST00000582139.1;ENST00000583458.4;ENST00000584778.4	338111;5435;57768;30519;304561;330831	CGI:chr17:79182746-79184147	.
cg13945749	0.568747	0.800726	-0.231979	3.0373e-06	4.13645e-06	chr5	2866351	2866352	.	.	.	.	CGI:chr5:2866585-2866891	N_Shore
cg09170112	0.387183	0.619124	-0.231941	4.35957e-09	1.52345e-08	chr12	131617643	131617644	.	.	.	.	CGI:chr12:131661159-131662265	.
cg07574896	0.542397	0.774091	-0.231694	1.47954e-09	6.31535e-09	chr6	401453	401454	IRF4;IRF4	protein_coding;protein_coding	ENST00000380956.7;ENST00000493114.1	9713;9684	CGI:chr6:391188-393802	.
cg25123362	0.465345	0.696821	-0.231476	2.85991e-06	3.93702e-06	chr10	131980230	131980231	BNIP3;BNIP3;RP11-45A17.4	protein_coding;protein_coding;antisense	ENST00000368636.7;ENST00000540159.2;ENST00000617191.1	1702;1694;-11	CGI:chr10:131979922-131980143	S_Shore
cg04696181	0.535922	0.767145	-0.231223	5.13139e-06	6.66033e-06	chr5	3386676	3386677	.	.	.	.	CGI:chr5:3326214-3326531	.
cg26504110	0.399254	0.630297	-0.231043	1.0809e-08	3.28925e-08	chr19	40624136	40624137	LTBP4;LTBP4;LTBP4;LTBP4;LTBP4;LTBP4;LTBP4;LTBP4;LTBP4	protein_coding;protein_coding;protein_coding;protein_coding;protein_coding;protein_coding;protein_coding;protein_coding;protein_coding	ENST00000204005.12;ENST00000243562.12;ENST00000308370.10;ENST00000318809.10;ENST00000396819.6;ENST00000595118.4;ENST00000597151.1;ENST00000599724.4;ENST00000601032.4	30969;14389;26900;10024;22764;10539;229;10687;12224	CGI:chr19:40623942-40624207	Island
cg11705747	0.596174	0.827187	-0.231013	8.71848e-08	1.88604e-07	chr2	128187494	128187495	UGGT1;UGGT1;UGGT1;UGGT1	protein_coding;protein_coding;protein_coding;protein_coding	ENST00000259253.9;ENST00000376723.6;ENST00000418197.1;ENST00000465836.1	96182;96282;7707;256	CGI:chr2:128232935-128233751	.
cg23460843	0.117754	0.348636	-0.230882	1.30201e-11	1.33561e-10	chr2	126886499	126886500	.	.	.	.	CGI:chr2:126886224-126886528	Island
cg16245054	0.633474	0.864182	-0.230708	1.74593e-08	4.91333e-08	chr12	132213949	132213950	GALNT9;GALNT9	protein_coding;protein_coding	ENST00000328957.11;ENST00000411988.5	115255;43794	CGI:chr12:132212116-132213179	S_Shore
cg01509330	0.500478	0.730935	-0.230457	2.03452e-06	2.9275e-06	chr6	170225934	170225935	.	.	.	.	CGI:chr6:170214542-170220892	.
cg06613817	0.605889	0.836345	-0.230456	4.29631e-06	5.68078e-06	chr1	119368047	119368048	HAO2;HAO2;HAO2;HAO2;HAO2-IT1	protein_coding;protein_coding;protein_coding;protein_coding;sense_intronic	ENST00000325945.3;ENST00000361035.7;ENST00000457318.4;ENST00000622548.3;ENST00000419144.1	-792;-763;-733;-733;-900	CGI:chr1:119327603-119327912	.
cg01089364	0.574882	0.805101	-0.230219	1.32399e-06	1.99209e-06	chr1	246618130	246618131	CNST;CNST;CNST;CNST	protein_coding;protein_coding;protein_coding;protein_coding	ENST00000366511.1;ENST00000366512.6;ENST00000366513.7;ENST00000483271.1	51615;51668;51683;51685	CGI:chr1:246619895-246620615	N_Shore
cg15997393	0.460941	0.690668	-0.229727	3.74443e-07	6.61516e-07	chr7	1922233	1922234	MAD1L1;MAD1L1;MAD1L1;MAD1L1;MAD1L1;MAD1L1	protein_coding;protein_coding;protein_coding;protein_coding;protein_coding;protein_coding	ENST00000265854.10;ENST00000399654.5;ENST00000402746.4;ENST00000406869.4;ENST00000437877.1;ENST00000450235.4	308186;310742;310713;311011;18317;58559	CGI:chr7:1928028-1928358	.
cg22033601	0.508255	0.737949	-0.229694	1.88233e-09	7.67411e-09	chr12	132601730	132601731	.	.	.	.	CGI:chr12:132601240-132601469	S_Shore
cg21396064	0.369431	0.599117	-0.229686	2.49692e-12	3.45226e-11	chr16	14303909	14303910	MIR193B;RP11-65J21.3;RP11-65J21.3	miRNA;lincRNA;lincRNA	ENST00000384907.1;ENST00000570945.1;ENST00000571639.1	-59;1620;1403	CGI:chr16:14301747-14303218	S_Shore
cg23313963	0.427194	0.656734	-0.22954	1.76221e-07	3.33519e-07	chr6	32056146	32056147	TNXB;TNXB	protein_coding;protein_coding	ENST00000375244.6;ENST00000611016.1	53229;6339	CGI:chr6:32079038-32079317	.
cg20421482	0.461093	0.690515	-0.229422	5.75903e-09	1.92776e-08	chr12	131684464	131684465	.	.	.	.	CGI:chr12:131686329-131686657	N_Shore
cg08162224	0.467585	0.696892	-0.229307	2.03548e-08	5.6002e-08	chr1	241641119	241641120	OPN3;OPN3;OPN3;OPN3;OPN3	protein_coding;protein_coding;protein_coding;protein_coding;protein_coding	ENST00000366554.2;ENST00000463155.4;ENST00000469376.4;ENST00000478849.1;ENST00000490673.4	-757;36258;-778;-908;-763	CGI:chr1:241640245-241640590	S_Shore
cg11161597	0.318925	0.548125	-0.2292	3.33692e-08	8.52322e-08	chr12	132167928	132167929	.	.	.	.	CGI:chr12:132168478-132168691	N_Shore
cg20558091	0.477032	0.706178	-0.229146	4.00067e-06	5.32307e-06	chr17	81148498	81148499	AATK;AATK;AATK	protein_coding;protein_coding;protein_coding	ENST00000326724.7;ENST00000374792.5;ENST00000572798.1	17520;17575;17580	CGI:chr17:81158079-81158284	.
cg13640423	0.571212	0.800328	-0.229116	5.76178e-08	1.35221e-07	chr3	120693237	120693238	RABL3;RABL3;RABL3;RABL3;RABL3;RABL3;RABL3	protein_coding;protein_coding;protein_coding;protein_coding;protein_coding;protein_coding;protein_coding	ENST00000273375.6;ENST00000465022.4;ENST00000473654.4;ENST00000481015.4;ENST00000483733.1;ENST00000485161.4;ENST00000491398.4	49301;49274;49757;49269;49284;49278;49297	CGI:chr3:120596111-120596643	.
cg04727521	0.487128	0.716083	-0.228955	5.28202e-11	4.09679e-10	chr16	1104951	1104952	LA16c-349E11.1	unprocessed_pseudogene	ENST00000564813.2	511	CGI:chr16:1104940-1105319	Island
cg22263031	0.522542	0.751367	-0.228825	3.26891e-09	1.19932e-08	chr15	96780718	96780719	SPATA8-AS1;SPATA8-AS1	antisense;antisense	ENST00000558722.1;ENST00000560888.4	2595;937	CGI:chr15:96416111-96417301	.
cg08864283	0.611422	0.840096	-0.228674	2.89548e-09	1.11608e-08	chr16	563142	563143	PRR35	protein_coding	ENST00000409413.3	2719	CGI:chr16:564792-565095	N_Shore
cg10120897	0.620752	0.849089	-0.228337	1.21728e-05	1.45524e-05	chr16	88431724	88431725	ZNF469;ZNF469	protein_coding;protein_coding	ENST00000437464.1;ENST00000565624.1	4252;4252	CGI:chr16:88431692-88432417	Island
cg26940676	0.543426	0.771668	-0.228242	8.81129e-07	1.39402e-06	chr17	79990189	79990190	TBC1D16;TBC1D16	protein_coding;protein_coding	ENST00000310924.5;ENST00000571872.1	45660;3446	CGI:chr17:79992006-79992497	N_Shore
cg24202448	0.421667	0.649793	-0.228126	9.47999e-12	1.05777e-10	chr10	7526144	7526145	.	.	.	.	CGI:chr10:7576414-7576652	.
cg10888111	0.62368	0.851436	-0.227756	5.27911e-07	8.92956e-07	chr2	1633296	1633297	PXDN;PXDN	protein_coding;protein_coding	ENST00000252804.7;ENST00000493654.1	111211;3769	CGI:chr2:1648223-1649629	.
cg07333231	0.465684	0.693433	-0.227749	5.32063e-05	5.69684e-05	chr8	1101728	1101729	ERICH1-AS1;ERICH1-AS1	antisense;antisense	ENST00000522092.4;ENST00000578889.1	364076;218399	CGI:chr8:1101641-1101896	Island
cg16958668	0.503183	0.73093	-0.227747	1.36098e-07	2.70495e-07	chr6	29307341	29307342	OR14J1	protein_coding	ENST00000377160.3	650	CGI:chr6:29165687-29166196	.
cg12653626	0.551783	0.779331	-0.227548	1.16506e-07	2.35231e-07	chr1	229223741	229223742	RP5-1061H20.5	antisense	ENST00000430677.1	3822	CGI:chr1:229270899-229271382	.
cg09901035	0.576394	0.803905	-0.227511	1.12946e-05	1.36307e-05	chr5	143048	143049	PLEKHG4B;PLEKHG4B	protein_coding;protein_coding	ENST00000283426.9;ENST00000502646.1	2789;2481	CGI:chr5:164595-166543	.
cg15793688	0.487624	0.71509	-0.227466	2.78898e-08	7.37253e-08	chr7	158719980	158719981	AC019084.7	processed_pseudogene	ENST00000457337.1	249	CGI:chr7:158704466-158705320	.
cg11852333	0.595967	0.823008	-0.227041	1.04615e-08	3.21426e-08	chr15	98785563	98785564	IGF1R;IGF1R;IGF1R;IGF1R;IGF1R	protein_coding;protein_coding;protein_coding;protein_coding;protein_coding	ENST00000268035.9;ENST00000557938.4;ENST00000558355.1;ENST00000558762.4;ENST00000559925.4	136591;50850;77731;136518;135980	CGI:chr15:98852205-98852747	.
cg14277925	0.473999	0.701024	-0.227025	2.43057e-05	2.78029e-05	chr11	859532	859533	RP11-1391J7.1;TSPAN4;TSPAN4;TSPAN4;TSPAN4;TSPAN4;TSPAN4;TSPAN4;TSPAN4;TSPAN4;TSPAN4;TSPAN4;TSPAN4;TSPAN4;TSPAN4;TSPAN4;TSPAN4;TSPAN4	antisense;protein_coding;protein_coding;protein_coding;protein_coding;protein_coding;protein_coding;protein_coding;protein_coding;protein_coding;protein_coding;protein_coding;protein_coding;protein_coding;protein_coding;protein_coding;protein_coding;protein_coding	ENST00000506172.2;ENST00000346501.7;ENST00000397396.4;ENST00000397397.5;ENST00000397404.4;ENST00000397406.4;ENST00000397408.4;ENST00000397411.5;ENST00000409531.4;ENST00000409543.5;ENST00000464987.4;ENST00000524895.4;ENST00000525201.4;ENST00000525334.4;ENST00000526055.4;ENST00000527644.1;ENST00000530404.4;ENST00000532375.4	264;12334;16707;16723;15085;15450;16590;16719;10721;15414;12334;12334;15378;16192;12334;9715;16216;12334	CGI:chr11:858575-859550	Island
cg03225476	0.503806	0.730825	-0.227019	2.06163e-07	3.78959e-07	chr12	132196427	132196428	GALNT9	protein_coding	ENST00000397325.5	9602	CGI:chr12:132198027-132198350	N_Shore
cg02216247	0.505805	0.732803	-0.226998	4.14146e-08	1.00151e-07	chr20	62710665	62710666	NTSR1	protein_coding	ENST00000370501.3	1827	CGI:chr20:62708506-62709868	S_Shore
cg20707230	0.55121	0.778055	-0.226845	1.00718e-05	1.22949e-05	chr5	1950587	1950588	RP11-259O2.1;RP11-259O2.1	lincRNA;lincRNA	ENST00000511693.1;ENST00000513419.1	16723;10814	CGI:chr5:1950510-1951557	Island
cg20384387	0.60322	0.830063	-0.226843	0.000249743	0.000252522	chr8	142136331	142136332	.	.	.	.	CGI:chr8:142121293-142121507	.
cg17094363	0.550375	0.777138	-0.226763	8.47564e-06	1.04467e-05	chr1	1130484	1130485	.	.	.	.	CGI:chr1:1136989-1137467	.
cg14498592	0.470648	0.697383	-0.226735	6.79273e-06	8.58882e-06	chr20	63461149	63461150	KCNQ2;KCNQ2;KCNQ2;KCNQ2;KCNQ2;KCNQ2;KCNQ2;KCNQ2;KCNQ2;KCNQ2;KCNQ2;KCNQ2	protein_coding;protein_coding;protein_coding;protein_coding;protein_coding;protein_coding;protein_coding;protein_coding;protein_coding;protein_coding;protein_coding;protein_coding	ENST00000344425.6;ENST00000344462.7;ENST00000359125.5;ENST00000360480.6;ENST00000370221.2;ENST00000370224.4;ENST00000625514.1;ENST00000626313.1;ENST00000626717.1;ENST00000626839.1;ENST00000629241.1;ENST00000629676.1	11492;11361;11442;11357;11441;11450;11407;-1100;2716;11529;11407;11407	CGI:chr20:63460973-63461233	Island
cg01667007	0.645185	0.871871	-0.226686	5.09869e-07	8.6705e-07	chr12	132591746	132591747	.	.	.	.	CGI:chr12:132591213-132591539	S_Shore
cg23494533	0.535189	0.761857	-0.226668	3.86411e-08	9.50675e-08	chr22	19725227	19725228	.	.	.	.	CGI:chr22:19725081-19725300	Island
cg06550539	0.470224	0.696888	-0.226664	1.08903e-14	4.32889e-13	chr10	132885433	132885434	CFAP46	protein_coding	ENST00000368586.8	57153	CGI:chr10:132885149-132885464	Island
cg16497661	0.591112	0.817771	-0.226659	1.04689e-07	2.1688e-07	chr14	103519995	103519996	CKB;CKB;CKB;CKB;CKB;CKB;CKB	protein_coding;protein_coding;protein_coding;protein_coding;protein_coding;protein_coding;protein_coding	ENST00000348956.5;ENST00000553528.4;ENST00000553610.4;ENST00000553652.4;ENST00000554282.4;ENST00000554989.1;ENST00000555039.1	3117;1776;1348;2827;1449;1328;1107	CGI:chr14:103520726-103523459	N_Shore
cg07795766	0.450582	0.677132	-0.22655	1.3097e-06	1.97855e-06	chr22	45212635	45212636	KIAA0930;KIAA0930;KIAA0930;KIAA0930;KIAA0930;KIAA0930;KIAA0930;KIAA0930;KIAA0930;KIAA0930;KIAA0930	protein_coding;protein_coding;protein_coding;protein_coding;protein_coding;protein_coding;protein_coding;protein_coding;protein_coding;protein_coding;protein_coding	ENST00000251993.10;ENST00000336156.8;ENST00000391627.5;ENST00000414854.4;ENST00000417906.1;ENST00000424508.4;ENST00000440039.4;ENST00000486640.4;ENST00000488038.4;ENST00000492273.1;ENST00000496226.1	-146;28135;14269;23643;28108;865;-553;22779;-177;-217;-189	CGI:chr22:45202840-45203199	.
cg19749898	0.415828	0.642372	-0.226544	1.42222e-06	2.11834e-06	chr11	1691535	1691536	.	.	.	.	CGI:chr11:1694117-1694377	N_Shelf
cg04909257	0.586211	0.81262	-0.226409	1.07262e-08	3.27974e-08	chr1	10402441	10402442	PGD;PGD;PGD;PGD;PGD;PGD	protein_coding;protein_coding;protein_coding;protein_coding;protein_coding;protein_coding	ENST00000270776.11;ENST00000460189.1;ENST00000465632.4;ENST00000477958.4;ENST00000483936.4;ENST00000491493.4	3360;2808;2942;3367;3328;3848	CGI:chr1:10398491-10399940	S_Shelf
cg19008320	0.447693	0.674056	-0.226363	4.42745e-07	7.67264e-07	chr12	132602270	132602271	.	.	.	.	CGI:chr12:132602022-132602271	Island
cg00030795	0.541291	0.767557	-0.226266	7.23387e-08	1.61998e-07	chr6	33454603	33454604	SYNGAP1;XXbac-BPG294E21.9;XXbac-BPG294E21.9;ZBTB9;ZBTB9;ZBTB9;ZBTB9	protein_coding;antisense;antisense;protein_coding;protein_coding;protein_coding;protein_coding	ENST00000629380.1;ENST00000614205.1;ENST00000630418.1;ENST00000395064.2;ENST00000612407.1;ENST00000612775.1;ENST00000621915.1	34532;-194;-149;23;-804;632;59	CGI:chr6:33454269-33454753	Island
cg17636806	0.453421	0.679553	-0.226132	5.99374e-11	4.53812e-10	chr6	33175954	33175955	COL11A2;COL11A2;COL11A2;COL11A2	protein_coding;protein_coding;protein_coding;protein_coding	ENST00000341947.5;ENST00000361917.4;ENST00000374708.7;ENST00000477772.1	16515;16515;16546;1940	CGI:chr6:33161514-33161941	.
cg00107982	0.591259	0.817374	-0.226115	7.84191e-07	1.25629e-06	chr22	37417059	37417060	ELFN2;ELFN2;ELFN2;ELFN2;ELFN2;ELFN2;ELFN2;RP1-63G5.5	protein_coding;protein_coding;protein_coding;protein_coding;protein_coding;protein_coding;protein_coding;sense_overlapping	ENST00000402918.5;ENST00000414347.4;ENST00000415408.1;ENST00000424973.4;ENST00000435824.4;ENST00000451509.4;ENST00000613079.3;ENST00000452946.1	10412;1895;10412;3433;3387;9945;10412;10387	CGI:chr22:37419764-37420438	N_Shelf
cg22193912	0.309118	0.535057	-0.225939	6.29826e-14	1.84078e-12	chr17	81923647	81923648	MAFG;MAFG;MAFG;RP11-498C9.12	protein_coding;protein_coding;protein_coding;antisense	ENST00000357736.7;ENST00000392366.6;ENST00000574686.1;ENST00000580897.1	4068;-114;4062;747	CGI:chr17:81922573-81922996	S_Shore
cg12213680	0.423438	0.649268	-0.22583	6.55873e-08	1.4792e-07	chr6	24877234	24877235	FAM65B;FAM65B;FAM65B;FAM65B;FAM65B;FAM65B;FAM65B	protein_coding;protein_coding;protein_coding;protein_coding;protein_coding;protein_coding;protein_coding	ENST00000259698.7;ENST00000378023.7;ENST00000510784.5;ENST00000538035.4;ENST00000540914.4;ENST00000612873.1;ENST00000613507.3	33734;122;164935;58819;132;-7;58819	CGI:chr6:24910398-24911358	.
cg01543184	0.332521	0.558229	-0.225708	1.74649e-13	3.70256e-12	chr17	81923667	81923668	MAFG;MAFG;MAFG;RP11-498C9.12	protein_coding;protein_coding;protein_coding;antisense	ENST00000357736.7;ENST00000392366.6;ENST00000574686.1;ENST00000580897.1	4048;-134;4042;767	CGI:chr17:81922573-81922996	S_Shore
cg14487131	0.0911102	0.316724	-0.225614	1.15431e-18	1.46828e-16	chr9	77018821	77018822	FOXB2	protein_coding	ENST00000376708.1	-835	CGI:chr9:77018410-77021114	Island
cg18186478	0.554267	0.779858	-0.225591	8.4733e-06	1.04467e-05	chr8	23566447	23566448	SLC25A37;SLC25A37;SLC25A37;SLC25A37;SLC25A37;SLC25A37;SLC25A37;SLC25A37;SLC25A37	protein_coding;protein_coding;protein_coding;protein_coding;protein_coding;protein_coding;protein_coding;protein_coding;protein_coding	ENST00000290075.9;ENST00000417331.5;ENST00000518881.4;ENST00000519973.4;ENST00000520654.1;ENST00000521637.1;ENST00000522164.4;ENST00000523883.4;ENST00000523930.1	37490;37490;37479;37641;37393;-330;-237;24976;37386	CGI:chr8:23571525-23571752	.
cg07970752	0.50993	0.735408	-0.225478	3.6541e-06	4.90297e-06	chr16	767463	767464	MSLN;MSLN;MSLN;MSLN;MSLN;MSLN;MSLN	protein_coding;protein_coding;protein_coding;protein_coding;protein_coding;protein_coding;protein_coding	ENST00000382862.6;ENST00000545450.5;ENST00000561896.1;ENST00000563941.4;ENST00000566269.5;ENST00000566549.4;ENST00000620831.3	6373;6697;1678;6700;1730;6695;124200	CGI:chr16:767352-768051	Island
cg25690202	0.658733	0.884003	-0.22527	1.78608e-07	3.36079e-07	chr19	38193688	38193689	SIPA1L3	protein_coding	ENST00000222345.9	286459	CGI:chr19:38209693-38209937	.
cg13261536	0.565138	0.789608	-0.22447	3.07932e-06	4.18472e-06	chr8	143261745	143261746	ZFP41;ZFP41;ZFP41	protein_coding;protein_coding;protein_coding	ENST00000330701.5;ENST00000522452.1;ENST00000626353.1	14816;14634;14816	CGI:chr8:143261617-143262144	Island
cg12225794	0.464493	0.688936	-0.224443	2.15692e-10	1.30648e-09	chr12	132160186	132160187	.	.	.	.	CGI:chr12:132154915-132155404	.
cg18447419	0.556354	0.780609	-0.224255	3.11533e-06	4.22463e-06	chr5	496184	496185	SLC9A3;SLC9A3	protein_coding;protein_coding	ENST00000264938.6;ENST00000514375.1	28149;28147	CGI:chr5:494688-495981	S_Shore
cg19335742	0.477974	0.702139	-0.224165	7.42864e-07	1.19759e-06	chr15	40274679	40274680	PAK6;PAK6;PAK6;PAK6;PAK6;PAK6;PAK6;PAK6;PAK6;PAK6	protein_coding;protein_coding;protein_coding;protein_coding;protein_coding;protein_coding;protein_coding;protein_coding;protein_coding;protein_coding	ENST00000260404.7;ENST00000441369.4;ENST00000453867.4;ENST00000455577.5;ENST00000542403.3;ENST00000557808.1;ENST00000558658.4;ENST00000558965.4;ENST00000559936.4;ENST00000560346.4	34808;57250;57250;35587;21494;748;57091;57250;57229;35258	CGI:chr15:40279877-40280557	.
cg01070987	0.414504	0.638648	-0.224144	1.08524e-11	1.16985e-10	chr3	149969215	149969216	ANKUB1;PFN2;PFN2;PFN2;PFN2;PFN2;PFN2;PFN2;PFN2;PFN2;PFN2;PFN2;PFN2;PFN2;PFN2;PFN2;PFN2;PFN2	protein_coding;protein_coding;protein_coding;protein_coding;protein_coding;protein_coding;protein_coding;protein_coding;protein_coding;protein_coding;protein_coding;protein_coding;protein_coding;protein_coding;protein_coding;protein_coding;protein_coding;protein_coding	ENST00000481585.1;ENST00000239940.10;ENST00000423691.2;ENST00000452853.5;ENST00000460404.4;ENST00000461868.1;ENST00000461930.1;ENST00000468323.4;ENST00000475518.4;ENST00000481275.4;ENST00000481767.4;ENST00000489155.1;ENST00000490975.1;ENST00000494827.4;ENST00000497060.1;ENST00000497148.4;ENST00000498169.1;ENST00000498307.4	-829;1895;1708;1736;1690;1726;1690;1684;1521;1187;1501;2009;1711;53597;-309;81574;1668;1999	CGI:chr3:149970090-149971750	N_Shore
cg14766621	0.501438	0.725471	-0.224033	4.7518e-06	6.20564e-06	chr2	1887285	1887286	MYT1L;MYT1L;MYT1L;MYT1L;MYT1L	protein_coding;protein_coding;protein_coding;protein_coding;protein_coding	ENST00000399161.5;ENST00000428368.5;ENST00000470954.1;ENST00000490585.1;ENST00000602387.4	443910;443832;221;15843;35446	CGI:chr2:1891925-1892160	.
cg16812174	0.579974	0.803755	-0.223781	1.03025e-06	1.60205e-06	chr8	23566349	23566350	SLC25A37;SLC25A37;SLC25A37;SLC25A37;SLC25A37;SLC25A37;SLC25A37;SLC25A37;SLC25A37;SLC25A37;SLC25A37	protein_coding;protein_coding;protein_coding;protein_coding;protein_coding;protein_coding;protein_coding;protein_coding;protein_coding;protein_coding;protein_coding	ENST00000290075.9;ENST00000417331.5;ENST00000517923.1;ENST00000518881.4;ENST00000519973.4;ENST00000520654.1;ENST00000520949.1;ENST00000521637.1;ENST00000522164.4;ENST00000523883.4;ENST00000523930.1	37392;37392;24786;37381;37543;37295;24661;-428;-335;24878;37288	CGI:chr8:23571525-23571752	.
cg19929638	0.457355	0.68113	-0.223775	2.80737e-06	3.87307e-06	chr7	155791386	155791387	.	.	.	.	CGI:chr7:155787129-155787698	S_Shelf
cg10956848	0.462599	0.685845	-0.223246	2.43309e-06	3.40847e-06	chr22	47631892	47631893	LINC00898;RP11-191L9.4;RP11-191L9.4	lincRNA;lincRNA;lincRNA	ENST00000380990.4;ENST00000423737.4;ENST00000426452.1	-322;217;201	CGI:chr22:47212945-47213572	.
cg21418534	0.571429	0.794637	-0.223208	6.82816e-06	8.61649e-06	chr13	112145706	112145707	.	.	.	.	CGI:chr13:112163502-112164625	.
cg09387486	0.655313	0.878463	-0.22315	1.02245e-05	1.24099e-05	chr7	156516664	156516665	LINC01006;LINC01006	lincRNA;lincRNA	ENST00000425712.1;ENST00000447933.4	86532;89101	CGI:chr7:156607324-156608018	.
cg06073535	0.523742	0.746801	-0.223059	7.81798e-06	9.7304e-06	chr11	733406	733407	.	.	.	.	CGI:chr11:734674-736521	N_Shore
cg17629322	0.409906	0.63295	-0.223044	3.79735e-09	1.35681e-08	chr12	130870879	130870880	RAN;RAN;RAN;RAN;RAN;RAN;RAN;RAN;RAN;RAN;RAN;RNU6-1077P	protein_coding;protein_coding;protein_coding;protein_coding;protein_coding;protein_coding;protein_coding;protein_coding;protein_coding;protein_coding;protein_coding;snRNA	ENST00000392367.4;ENST00000392369.5;ENST00000448750.6;ENST00000464211.5;ENST00000477395.4;ENST00000535090.4;ENST00000536606.4;ENST00000537745.4;ENST00000541630.4;ENST00000541679.6;ENST00000543796.4;ENST00000410506.1	-1218;-1192;-1159;-1218;-1192;-1198;-1169;-1188;-1188;-1204;-1001;-1041	CGI:chr12:130871565-130872683	N_Shore
cg14264125	0.607564	0.830516	-0.222952	4.67777e-06	6.12982e-06	chr7	158719906	158719907	AC019084.7	processed_pseudogene	ENST00000457337.1	175	CGI:chr7:158704466-158705320	.
cg14854474	0.530007	0.752747	-0.22274	3.55826e-05	3.9221e-05	chr1	1077146	1077147	.	.	.	.	CGI:chr1:1076129-1078022	Island
cg04633922	0.503181	0.725585	-0.222404	7.32535e-06	9.18309e-06	chr10	2657099	2657100	.	.	.	.	CGI:chr10:2772811-2773277	.
cg01877524	0.690526	0.91287	-0.222344	2.06669e-05	2.38119e-05	chr11	117780644	117780645	DSCAML1;DSCAML1;DSCAML1	protein_coding;protein_coding;protein_coding	ENST00000321322.6;ENST00000525836.1;ENST00000527706.4	16618;36882;16448	CGI:chr11:117780501-117780714	Island
cg01263631	0.463592	0.685931	-0.222339	3.18413e-08	8.16575e-08	chr16	88419063	88419064	.	.	.	.	CGI:chr16:88429793-88431355	.
cg20826162	0.640667	0.862859	-0.222192	5.35383e-06	6.89279e-06	chr1	3595146	3595147	MEGF6;MEGF6	protein_coding;protein_coding	ENST00000356575.7;ENST00000485002.5	16350;16132	CGI:chr1:3595145-3595554	Island
cg10068222	0.443163	0.665299	-0.222136	2.42086e-08	6.52401e-08	*	-1	-1	.	.	.	.	.	.
cg12593511	0.507394	0.729522	-0.222128	7.50009e-06	9.37143e-06	chr1	3360189	3360190	PRDM16;PRDM16;PRDM16;PRDM16;PRDM16;PRDM16	protein_coding;protein_coding;protein_coding;protein_coding;protein_coding;protein_coding	ENST00000270722.8;ENST00000378391.5;ENST00000463591.1;ENST00000511072.4;ENST00000512462.4;ENST00000514189.4	290977;290991;116056;291020;122257;290977	CGI:chr1:3358465-3358720	S_Shore
cg20340346	0.664711	0.886606	-0.221895	1.91176e-07	3.54484e-07	chr11	1229662	1229663	MUC5B;MUC5B;MUC5B	protein_coding;protein_coding;protein_coding	ENST00000525715.4;ENST00000529681.4;ENST00000531082.1	6595;6595;1141	CGI:chr11:1230916-1231148	N_Shore
cg16560389	0.529337	0.751183	-0.221846	2.33568e-05	2.68139e-05	chr10	131519938	131519939	.	.	.	.	CGI:chr10:131519765-131520061	Island
cg12554476	0.483176	0.70496	-0.221784	5.63745e-09	1.90714e-08	chr16	20327486	20327487	GP2;GP2;GP2;GP2;GP2;GP2;GP2;GP2;GP2;GP2	protein_coding;protein_coding;protein_coding;protein_coding;protein_coding;protein_coding;protein_coding;protein_coding;protein_coding;protein_coding	ENST00000302555.8;ENST00000341642.8;ENST00000381360.8;ENST00000381362.7;ENST00000572347.4;ENST00000572478.4;ENST00000574982.1;ENST00000575449.1;ENST00000575582.4;ENST00000575730.1	95;22;323;22;22;22;-1067;-573;-59;23	CGI:chr16:20348445-20349176	.
cg22457668	0.538638	0.760402	-0.221764	2.5355e-06	3.52862e-06	chr8	1369886	1369887	AF067845.1	lincRNA	ENST00000567210.1	-52	CGI:chr8:1373066-1373472	N_Shelf
cg02907117	0.439928	0.661677	-0.221749	4.80836e-11	3.82265e-10	chr12	132407003	132407004	.	.	.	.	CGI:chr12:132406581-132407768	Island
cg06330323	0.488978	0.710708	-0.22173	2.52003e-05	2.86584e-05	chr16	2082314	2082315	TSC2;TSC2;TSC2;TSC2;TSC2;TSC2;TSC2;TSC2;TSC2;TSC2	protein_coding;protein_coding;protein_coding;protein_coding;protein_coding;protein_coding;protein_coding;protein_coding;protein_coding;protein_coding	ENST00000219476.6;ENST00000350773.7;ENST00000382538.9;ENST00000401874.5;ENST00000439117.5;ENST00000439673.5;ENST00000497886.4;ENST00000568454.4;ENST00000569110.1;ENST00000569930.1	34848;34293;34333;34324;34280;34299;4074;34111;-877;-384	CGI:chr16:2084258-2084631	N_Shore
cg10993085	0.466615	0.688341	-0.221726	1.60177e-10	1.02902e-09	chr6	32105639	32105640	ATF6B;TNXB;TNXB;TNXB;TNXB	protein_coding;protein_coding;protein_coding;protein_coding;protein_coding	ENST00000494022.1;ENST00000375244.6;ENST00000442721.1;ENST00000479795.1;ENST00000486148.1	11972;3736;9696;3675;3583	CGI:chr6:32095756-32097267	.
cg00177698	0.560026	0.781666	-0.22164	6.91019e-05	7.31261e-05	chr17	47941509	47941510	PNPO;PNPO;PNPO;PNPO;PNPO;PNPO;PNPO;SP2-AS1;SP2-AS1;SP2-AS1;SP2-AS1	protein_coding;protein_coding;protein_coding;protein_coding;protein_coding;protein_coding;protein_coding;antisense;antisense;antisense;antisense	ENST00000225573.4;ENST00000434554.5;ENST00000582171.4;ENST00000583245.4;ENST00000583599.4;ENST00000584061.4;ENST00000585320.4;ENST00000411573.5;ENST00000433001.1;ENST00000451140.5;ENST00000585280.4	-63;-63;-117;-63;2;-63;-110;-149;-118;-98;-119	CGI:chr17:47970703-47971457	.
cg14204266	0.686344	0.907925	-0.221581	3.22532e-05	3.58619e-05	chr7	100892563	100892564	ACHE;ACHE;ACHE;ACHE;ACHE;ACHE;ACHE;ACHE;ACHE;ACHE;ACHE	protein_coding;protein_coding;protein_coding;protein_coding;protein_coding;protein_coding;protein_coding;protein_coding;protein_coding;protein_coding;protein_coding	ENST00000241069.8;ENST00000302913.7;ENST00000411582.1;ENST00000412389.4;ENST00000419336.5;ENST00000426415.4;ENST00000428317.4;ENST00000430554.1;ENST00000440755.4;ENST00000442452.1;ENST00000454485.4	3326;3358;3299;1826;3324;1671;3570;1671;1671;1671;1671	CGI:chr7:100892360-100892744	Island
cg26569914	0.616265	0.837816	-0.221551	1.2892e-06	1.95222e-06	chr2	239477390	239477391	.	.	.	.	CGI:chr2:239527380-239528070	.
cg27205904	0.207938	0.429405	-0.221467	4.07512e-11	3.40058e-10	chr12	104303736	104303737	EID3;TXNRD1;TXNRD1;TXNRD1;TXNRD1;TXNRD1;TXNRD1;TXNRD1;TXNRD1;TXNRD1;TXNRD1;TXNRD1;TXNRD1;TXNRD1;TXNRD1;TXNRD1;TXNRD1;TXNRD1;TXNRD1;TXNRD1	protein_coding;protein_coding;protein_coding;protein_coding;protein_coding;protein_coding;protein_coding;protein_coding;protein_coding;protein_coding;protein_coding;protein_coding;protein_coding;protein_coding;protein_coding;protein_coding;protein_coding;protein_coding;protein_coding;protein_coding	ENST00000527879.1;ENST00000354940.9;ENST00000388854.6;ENST00000397736.5;ENST00000429002.5;ENST00000503506.5;ENST00000524698.4;ENST00000525566.4;ENST00000526266.4;ENST00000526390.4;ENST00000526580.4;ENST00000526691.4;ENST00000527335.4;ENST00000527688.4;ENST00000528079.5;ENST00000529546.4;ENST00000529751.1;ENST00000529784.4;ENST00000531689.4;ENST00000531691.4	-4;17053;17053;17053;87956;17053;16367;87956;17733;16745;16678;16854;14840;15017;16686;16713;16711;16413;16740;16810	CGI:chr12:104303570-104304206	Island
cg14623024	0.445623	0.666962	-0.221339	9.9931e-07	1.55775e-06	chr8	142125590	142125591	.	.	.	.	CGI:chr8:142121293-142121507	.
cg12228461	0.474677	0.695924	-0.221247	5.04721e-11	3.96299e-10	chr6	33175944	33175945	COL11A2;COL11A2;COL11A2;COL11A2	protein_coding;protein_coding;protein_coding;protein_coding	ENST00000341947.5;ENST00000361917.4;ENST00000374708.7;ENST00000477772.1	16525;16525;16556;1950	CGI:chr6:33161514-33161941	.
cg09845293	0.614263	0.835329	-0.221066	1.71918e-07	3.26388e-07	chr10	7526018	7526019	.	.	.	.	CGI:chr10:7576414-7576652	.
cg18860868	0.517066	0.737883	-0.220817	7.22351e-07	1.17198e-06	chr12	117151146	117151147	FBXO21;FBXO21;FBXO21;FBXO21	protein_coding;protein_coding;protein_coding;protein_coding	ENST00000330622.8;ENST00000427718.5;ENST00000550180.4;ENST00000622495.3	39311;39326;39141;39386	CGI:chr12:117155548-117155894	.
cg21769702	0.484006	0.704789	-0.220783	3.09274e-09	1.17029e-08	chr11	127941694	127941695	RP11-676M6.1	processed_pseudogene	ENST00000526843.2	-39	CGI:chr11:128451766-128452000	.
cg13952483	0.380947	0.60165	-0.220703	8.0392e-08	1.77532e-07	chr1	222928440	222928441	DISP1;DISP1;DISP1;RP11-455P21.3	protein_coding;protein_coding;protein_coding;lincRNA	ENST00000284476.7;ENST00000360254.3;ENST00000482856.1;ENST00000495684.2	15;56168;-2;113375	CGI:chr1:222814994-222815219	.
cg06563450	0.518251	0.73885	-0.220599	2.22796e-12	3.22041e-11	chr5	56441384	56441385	.	.	.	.	CGI:chr5:56480777-56481406	.
cg27272853	0.518122	0.73871	-0.220588	4.63557e-06	6.10398e-06	chr16	841260	841261	.	.	.	.	CGI:chr16:844644-845057	N_Shelf
cg27258050	0.384229	0.604717	-0.220488	1.27304e-08	3.80119e-08	chr10	132809774	132809775	CFAP46	protein_coding	ENST00000368586.8	132812	CGI:chr10:132808919-132809137	S_Shore
cg09039112	0.636702	0.857143	-0.220441	6.39368e-08	1.46195e-07	chr16	29142086	29142087	RP11-426C22.5;RP11-426C22.5	lincRNA;lincRNA	ENST00000562902.1;ENST00000563477.1	25958;2424	CGI:chr16:29141920-29142157	Island
cg14266287	0.495479	0.715817	-0.220338	3.87146e-08	9.50675e-08	chr2	238425865	238425866	ASB1;ASB1;ASB1;ASB1;ASB1	protein_coding;protein_coding;protein_coding;protein_coding;protein_coding	ENST00000264607.7;ENST00000409297.1;ENST00000438264.4;ENST00000463352.4;ENST00000469885.1	-960;-1140;-1165;-878;-966	CGI:chr2:238426519-238427622	N_Shore
cg12906108	0.544219	0.764533	-0.220314	0.000193011	0.000197355	chr12	123799536	123799537	DNAH10;DNAH10;DNAH10;DNAH10	protein_coding;protein_coding;protein_coding;protein_coding	ENST00000409039.6;ENST00000447853.2;ENST00000467219.4;ENST00000614082.1	37347;18408;18431;37040	CGI:chr12:123787581-123788038	.
cg12405684	0.57622	0.796411	-0.220191	7.06008e-07	1.14839e-06	chr11	1393397	1393398	BRSK2;BRSK2;BRSK2;BRSK2;BRSK2	protein_coding;protein_coding;protein_coding;protein_coding;protein_coding	ENST00000308219.12;ENST00000526678.4;ENST00000528841.4;ENST00000529433.4;ENST00000531197.4	3497;3111;3495;3495;3495	CGI:chr11:1388889-1391116	S_Shelf
cg20555462	0.555182	0.775325	-0.220143	1.37135e-07	2.71707e-07	chr11	122664810	122664811	UBASH3B;UBASH3B	protein_coding;protein_coding	ENST00000284273.5;ENST00000525711.1	9134;9084	CGI:chr11:122655570-122656771	.
cg13080282	0.250812	0.470873	-0.220061	6.15908e-10	3.08439e-09	chr12	24564244	24564245	.	.	.	.	CGI:chr12:24562022-24563360	S_Shore
cg19483465	0.42344	0.64342	-0.21998	2.59181e-08	6.92601e-08	chr12	132320353	132320354	GALNT9;GALNT9	protein_coding;protein_coding	ENST00000328957.11;ENST00000424720.5	8851;8997	CGI:chr12:132319713-132319983	S_Shore
cg15048991	0.160522	0.379803	-0.219281	8.34956e-08	1.83114e-07	chr5	5139753	5139754	ADAMTS16;ADAMTS16;ADAMTS16;CTD-2297D10.2	protein_coding;protein_coding;protein_coding;antisense	ENST00000274181.7;ENST00000433402.2;ENST00000511368.4;ENST00000512155.1	-578;-716;-578;302	CGI:chr5:5139328-5140828	Island
cg04136610	0.180746	0.400013	-0.219267	1.07311e-07	2.20873e-07	chr5	5139765	5139766	ADAMTS16;ADAMTS16;ADAMTS16;CTD-2297D10.2	protein_coding;protein_coding;protein_coding;antisense	ENST00000274181.7;ENST00000433402.2;ENST00000511368.4;ENST00000512155.1	-566;-704;-566;290	CGI:chr5:5139328-5140828	Island
cg22348992	0.367795	0.587049	-0.219254	4.21097e-05	4.58592e-05	chr20	63348211	63348212	CHRNA4;CHRNA4;CHRNA4;CHRNA4;CHRNA4;CHRNA4;CHRNA4	protein_coding;protein_coding;protein_coding;protein_coding;protein_coding;protein_coding;protein_coding	ENST00000370263.7;ENST00000463705.4;ENST00000467563.2;ENST00000498043.5;ENST00000615287.3;ENST00000627000.1;ENST00000631289.1	13133;29783;13094;11489;13186;13094;-1275	CGI:chr20:63347973-63348221	Island
cg09180070	0.523807	0.742919	-0.219112	6.23494e-05	6.64225e-05	chr8	890321	890322	ERICH1-AS1;ERICH1-AS1;ERICH1-AS1;ERICH1-AS1	antisense;antisense;antisense;antisense	ENST00000522092.4;ENST00000524139.4;ENST00000577187.4;ENST00000578889.1	152669;7122;152578;6992	CGI:chr8:882244-882918	.
cg23643466	0.467983	0.686994	-0.219011	4.22933e-11	3.44853e-10	chr10	130486642	130486643	.	.	.	.	CGI:chr10:130567421-130567717	.
cg03176203	0.307732	0.526548	-0.218816	1.6164e-15	7.90793e-14	chr16	14487006	14487007	PARN;PARN;PARN;PARN;PARN;PARN	protein_coding;protein_coding;protein_coding;protein_coding;protein_coding;protein_coding	ENST00000341484.10;ENST00000420015.5;ENST00000437198.5;ENST00000539279.4;ENST00000564882.4;ENST00000564904.4	143271;143254;143262;143233;14684;78070	CGI:chr16:14629745-14630309	.
cg10942056	0.398597	0.617272	-0.218675	1.19427e-07	2.39607e-07	chr1	222928506	222928507	DISP1;DISP1;DISP1;RP11-455P21.3	protein_coding;protein_coding;protein_coding;lincRNA	ENST00000284476.7;ENST00000360254.3;ENST00000482856.1;ENST00000495684.2	81;56234;64;113441	CGI:chr1:222814994-222815219	.
cg18668836	0.616887	0.835407	-0.21852	4.54219e-05	4.92135e-05	chr2	112345607	112345608	AC115115.4	processed_pseudogene	ENST00000449927.1	-405	CGI:chr2:112275216-112276380	.
cg16774084	0.481283	0.699648	-0.218365	1.47659e-08	4.26869e-08	chr14	106802751	106802752	IGHV3-73	IG_V_gene	ENST00000390636.2	483	CGI:chr14:106812858-106813074	.
cg24788034	0.456397	0.674663	-0.218266	9.23607e-08	1.9646e-07	chr19	2588243	2588244	GNG7;GNG7	protein_coding;protein_coding	ENST00000382159.6;ENST00000587867.1	114467;95449	CGI:chr19:2588377-2588592	N_Shore
cg13492826	0.437898	0.655715	-0.217817	1.86511e-11	1.72199e-10	chr15	25710125	25710126	ATP10A;ATP10A;RP11-345J18.2	protein_coding;protein_coding;sense_intronic	ENST00000356865.9;ENST00000555815.4;ENST00000620538.1	153084;153599;745	CGI:chr15:25713730-25714093	N_Shelf
cg09448875	0.571637	0.7894	-0.217763	1.52594e-07	2.98005e-07	chr10	99782692	99782693	ABCC2;ABCC2	protein_coding;protein_coding	ENST00000370434.1;ENST00000370449.7	-72;-41	CGI:chr10:99731923-99732597	.
cg15771735	0.423173	0.64082	-0.217647	1.06773e-09	4.78223e-09	chr6	60646574	60646575	.	.	.	.	CGI:chr6:62285950-62286323	.
cg03130418	0.471452	0.689089	-0.217637	4.65606e-06	6.11829e-06	chr6	32095662	32095663	TNXB;TNXB;TNXB;TNXB	protein_coding;protein_coding;protein_coding;protein_coding	ENST00000375244.6;ENST00000479795.1;ENST00000486148.1;ENST00000613214.3	13713;13652;13560;2537	CGI:chr6:32095756-32097267	N_Shore
cg25478712	0.694386	0.911895	-0.217509	1.7784e-06	2.60014e-06	*	-1	-1	.	.	.	.	.	.
cg18647449	0.510747	0.728246	-0.217499	1.01105e-09	4.59306e-09	chr10	132916718	132916719	CFAP46;CFAP46	protein_coding;protein_coding	ENST00000368586.8;ENST00000486104.4	25868;-35	CGI:chr10:132916294-132916518	S_Shore
cg11856334	0.515956	0.733418	-0.217462	1.32493e-06	1.99209e-06	chr2	81195239	81195240	AC105342.1	processed_pseudogene	ENST00000378334.3	5946	CGI:chr2:81194080-81195408	Island
cg06819251	0.644152	0.861539	-0.217387	2.45953e-05	2.80837e-05	chr6	32009822	32009823	TNXA	unprocessed_pseudogene	ENST00000507684.1	2651	CGI:chr6:31971953-31972782	.
cg17530965	0.660717	0.878057	-0.21734	9.95851e-07	1.55617e-06	chr5	1034312	1034313	NKD2;NKD2;NKD2;NKD2;NKD2	protein_coding;protein_coding;protein_coding;protein_coding;protein_coding	ENST00000274150.4;ENST00000296849.8;ENST00000513296.2;ENST00000519933.4;ENST00000523688.1	25349;25482;-1494;175;-445	CGI:chr5:1037849-1038311	N_Shelf
cg09560452	0.580671	0.797983	-0.217312	1.06781e-07	2.20496e-07	chr22	29049915	29049916	ZNRF3;ZNRF3;ZNRF3;chr22-38_28785274-29006793.1	protein_coding;protein_coding;protein_coding;lincRNA	ENST00000402174.4;ENST00000406323.3;ENST00000544604.5;ENST00000623644.1	132525;62862;166322;119713	CGI:chr22:29049650-29050125	Island
cg14309307	0.617025	0.834301	-0.217276	2.08141e-06	2.97478e-06	chr6	105302648	105302649	PREP;RPL35P3	protein_coding;processed_pseudogene	ENST00000369110.6;ENST00000403133.1	100437;176	CGI:chr6:105402606-105403382	.
cg08056755	0.65468	0.871838	-0.217158	1.47376e-05	1.75198e-05	chr16	1066397	1066398	RP11-161M6.5;SSTR5-AS1;SSTR5-AS1;SSTR5-AS1	lincRNA;processed_transcript;processed_transcript;processed_transcript	ENST00000564390.1;ENST00000565992.1;ENST00000569734.1;ENST00000569832.4	1156;7207;840;12277	CGI:chr16:1065368-1066468	Island
cg12466919	0.521334	0.738482	-0.217148	1.74659e-11	1.65796e-10	chr5	179824000	179824001	SQSTM1;SQSTM1;SQSTM1;SQSTM1;SQSTM1;SQSTM1;SQSTM1;SQSTM1;SQSTM1;SQSTM1	protein_coding;protein_coding;protein_coding;protein_coding;protein_coding;protein_coding;protein_coding;protein_coding;protein_coding;protein_coding	ENST00000360718.5;ENST00000389805.7;ENST00000422245.4;ENST00000464493.4;ENST00000466342.1;ENST00000485412.1;ENST00000504627.1;ENST00000508284.4;ENST00000510187.4;ENST00000514093.4	1514;3240;5121;3392;141;434;3094;3121;3078;17591	CGI:chr5:179820784-179821711	S_Shelf
cg07216610	0.507405	0.724457	-0.217052	6.60336e-07	1.08801e-06	chr2	235968848	235968849	AGAP1;AGAP1;AGAP1;AGAP1;AGAP1;AGAP1;AGAP1	protein_coding;protein_coding;protein_coding;protein_coding;protein_coding;protein_coding;protein_coding	ENST00000304032.11;ENST00000336665.8;ENST00000409538.4;ENST00000418654.1;ENST00000428334.5;ENST00000448025.4;ENST00000614409.3	474740;474740;299243;60005;259669;85452;259670	CGI:chr2:235959008-235959262	.
cg17497172	0.495617	0.712595	-0.216978	1.76186e-08	4.93631e-08	chr20	31440426	31440427	DEFB123	protein_coding	ENST00000376309.3	-94	CGI:chr20:31475246-31475478	.
cg00719072	0.532276	0.749245	-0.216969	6.16509e-08	1.42582e-07	*	-1	-1	.	.	.	.	.	.
cg10286056	0.619772	0.836416	-0.216644	0.000238789	0.000241831	chr10	12898470	12898471	CCDC3;CCDC3	protein_coding;protein_coding	ENST00000378825.4;ENST00000378839.1	103228;201183	CGI:chr10:13001094-13001781	.
cg24134897	0.343316	0.559872	-0.216556	3.96577e-09	1.3935e-08	chr11	859670	859671	RP11-1391J7.1;TSPAN4;TSPAN4;TSPAN4;TSPAN4;TSPAN4;TSPAN4;TSPAN4;TSPAN4;TSPAN4;TSPAN4;TSPAN4;TSPAN4;TSPAN4;TSPAN4;TSPAN4;TSPAN4;TSPAN4	antisense;protein_coding;protein_coding;protein_coding;protein_coding;protein_coding;protein_coding;protein_coding;protein_coding;protein_coding;protein_coding;protein_coding;protein_coding;protein_coding;protein_coding;protein_coding;protein_coding;protein_coding	ENST00000506172.2;ENST00000346501.7;ENST00000397396.4;ENST00000397397.5;ENST00000397404.4;ENST00000397406.4;ENST00000397408.4;ENST00000397411.5;ENST00000409531.4;ENST00000409543.5;ENST00000464987.4;ENST00000524895.4;ENST00000525201.4;ENST00000525334.4;ENST00000526055.4;ENST00000527644.1;ENST00000530404.4;ENST00000532375.4	126;12472;16845;16861;15223;15588;16728;16857;10859;15552;12472;12472;15516;16330;12472;9853;16354;12472	CGI:chr11:858575-859550	S_Shore
cg21554895	0.425177	0.641591	-0.216414	8.92942e-07	1.40921e-06	chr13	20129276	20129277	.	.	.	.	CGI:chr13:20128712-20128983	S_Shore
cg12477716	0.174916	0.391299	-0.216383	9.98253e-08	2.0816e-07	chr17	48996074	48996075	IGF2BP1;IGF2BP1;RP11-501C14.5	protein_coding;protein_coding;antisense	ENST00000290341.6;ENST00000510023.4;ENST00000505903.1	-1339;-1413;1419	CGI:chr17:48995458-48998680	Island
cg16100355	0.614966	0.831317	-0.216351	6.2351e-06	7.9629e-06	chr13	112994293	112994294	MCF2L;MCF2L;MCF2L;MCF2L;MCF2L	protein_coding;protein_coding;protein_coding;protein_coding;protein_coding	ENST00000375608.6;ENST00000397030.4;ENST00000421756.4;ENST00000433807.4;ENST00000535094.5	99914;25792;14980;9174;25071	CGI:chr13:112994029-112994396	Island
cg11026867	0.478445	0.694776	-0.216331	2.95327e-08	7.72955e-08	chr12	6364477	6364478	SCNN1A;SCNN1A;SCNN1A;SCNN1A;SCNN1A;SCNN1A;SCNN1A;SCNN1A;SCNN1A;SCNN1A	protein_coding;protein_coding;protein_coding;protein_coding;protein_coding;protein_coding;protein_coding;protein_coding;protein_coding;protein_coding	ENST00000228916.5;ENST00000338748.8;ENST00000360168.6;ENST00000396966.5;ENST00000536176.1;ENST00000538979.4;ENST00000540037.4;ENST00000542966.1;ENST00000543768.1;ENST00000544882.1	11073;10327;10748;10327;10903;10958;-329;-851;12883;11087	CGI:chr12:6363310-6364156	S_Shore
cg26597603	0.638424	0.854601	-0.216177	8.83376e-06	1.08461e-05	chr13	113402514	113402515	RP11-102K13.5	lincRNA	ENST00000612156.1	3059	CGI:chr13:113401785-113402262	S_Shore
cg26010877	0.556141	0.772263	-0.216122	6.87166e-07	1.12349e-06	chr10	129415726	129415727	.	.	.	.	CGI:chr10:129466684-129467446	.
cg01271726	0.564823	0.780938	-0.216115	2.10769e-06	2.99886e-06	chr6	26323358	26323359	HIST1H3PS1	processed_pseudogene	ENST00000404612.1	-1065	CGI:chr6:26285195-26285712	.
cg14925067	0.666432	0.882246	-0.215814	6.53307e-08	1.47866e-07	chr8	1832235	1832236	ARHGEF10;ARHGEF10;ARHGEF10;ARHGEF10	protein_coding;protein_coding;protein_coding;protein_coding	ENST00000349830.6;ENST00000398564.4;ENST00000518288.4;ENST00000520359.4	8258;6123;8219;8246	CGI:chr8:1831454-1831655	S_Shore
cg27271738	0.526656	0.742431	-0.215775	9.22765e-08	1.9646e-07	chr16	88133299	88133300	.	.	.	.	CGI:chr16:88131954-88132428	S_Shore
cg23275958	0.534668	0.75036	-0.215692	2.56369e-07	4.64532e-07	chr17	77507167	77507168	.	.	.	.	CGI:chr17:77528507-77529070	.
cg20908131	0.505245	0.720726	-0.215481	3.76764e-07	6.63773e-07	chr14	97953438	97953439	LINC01550;LINC01550	lincRNA;lincRNA	ENST00000499006.5;ENST00000556462.1	24687;24619	CGI:chr14:97218722-97219609	.
cg14614314	0.0547733	0.270241	-0.215468	1.33799e-15	7.09135e-14	chr10	133336924	133336925	CALY;CALY;CALY;PRAP1	protein_coding;protein_coding;protein_coding;protein_coding	ENST00000252939.7;ENST00000368555.3;ENST00000368558.1;ENST00000368554.7	-16;-51;12;27513	CGI:chr10:133334692-133337061	Island
cg02043895	0.553458	0.768878	-0.21542	9.73225e-06	1.19033e-05	*	-1	-1	.	.	.	.	.	.
cg14264159	0.504222	0.719617	-0.215395	1.57538e-07	3.0547e-07	chr9	135524544	135524545	LCN1;LCN1	protein_coding;protein_coding	ENST00000263598.5;ENST00000371781.3	3105;3088	CGI:chr9:135499548-135501425	.
cg00186701	0.448196	0.663319	-0.215123	2.45051e-06	3.42533e-06	chr8	97278282	97278283	TSPYL5	protein_coding	ENST00000322128.4	-317	CGI:chr8:97277376-97278176	S_Shore
cg06573787	0.286698	0.501804	-0.215106	5.64947e-07	9.43061e-07	chr8	141988826	141988827	.	.	.	.	CGI:chr8:141973423-141973687	.
cg12597309	0.341274	0.555979	-0.214705	5.32139e-10	2.75055e-09	chr12	123909225	123909226	DNAH10;DNAH10	protein_coding;protein_coding	ENST00000409039.6;ENST00000540041.2	147036;911	CGI:chr12:123937034-123937616	.
cg24795748	0.592516	0.807009	-0.214493	1.16348e-09	5.1387e-09	chr21	45984251	45984252	COL6A1;COL6A1	protein_coding;protein_coding	ENST00000361866.6;ENST00000612273.1	2513;2481	CGI:chr21:45984194-45984398	Island
cg01660346	0.55021	0.764678	-0.214468	7.85235e-06	9.75409e-06	chr6	29307383	29307384	OR14J1	protein_coding	ENST00000377160.3	692	CGI:chr6:29165687-29166196	.
cg25199385	0.485765	0.700212	-0.214447	9.04254e-12	1.02779e-10	chr12	130761522	130761523	.	.	.	.	CGI:chr12:130715964-130716181	.
cg07665535	0.406449	0.62087	-0.214421	4.7061e-12	6.23558e-11	chr16	14303899	14303900	MIR193B;RP11-65J21.3;RP11-65J21.3	miRNA;lincRNA;lincRNA	ENST00000384907.1;ENST00000570945.1;ENST00000571639.1	-69;1610;1393	CGI:chr16:14301747-14303218	S_Shore
cg25017223	0.490492	0.704813	-0.214321	0.000146195	0.00015168	chr17	77242621	77242622	.	.	.	.	CGI:chr17:77246789-77247531	.
cg11975793	0.374041	0.588338	-0.214297	1.4774e-11	1.46455e-10	chr2	223052859	223052860	KCNE4;KCNE4	protein_coding;protein_coding	ENST00000281830.3;ENST00000488477.2	1044;658	CGI:chr2:223052858-223053319	Island
cg23205818	0.546338	0.760634	-0.214296	1.20671e-06	1.85379e-06	chr14	72562424	72562425	RGS6;RGS6;RGS6;RGS6;RGS6;RGS6;RGS6;RGS6;RGS6;RGS6;RP3-514A23.2	protein_coding;protein_coding;protein_coding;protein_coding;protein_coding;protein_coding;protein_coding;protein_coding;protein_coding;protein_coding;lincRNA	ENST00000343854.9;ENST00000402788.5;ENST00000553525.4;ENST00000553530.4;ENST00000554300.1;ENST00000554474.4;ENST00000554782.1;ENST00000555571.4;ENST00000556437.4;ENST00000622468.3;ENST00000555303.1	210330;210331;629984;629307;22361;629278;102754;629806;629191;210330;32702	CGI:chr14:72892081-72894226	.
cg03547078	0.476579	0.690808	-0.214229	8.82643e-08	1.89649e-07	chr1	1923864	1923865	CFAP74;CFAP74;CFAP74	protein_coding;protein_coding;protein_coding	ENST00000412120.2;ENST00000464311.4;ENST00000493964.4	3540;4066;79974	CGI:chr1:1918659-1919952	S_Shelf
cg27082921	0.52274	0.736837	-0.214097	6.77352e-06	8.58882e-06	chr19	1800151	1800152	ATP8B3;ATP8B3;ATP8B3;ATP8B3;ATP8B3	protein_coding;protein_coding;protein_coding;protein_coding;protein_coding	ENST00000310127.9;ENST00000525591.4;ENST00000526092.5;ENST00000531925.4;ENST00000533107.2	12126;12050;12126;12126;6010	CGI:chr19:1799935-1800249	Island
cg26479667	0.314184	0.528226	-0.214042	9.46838e-09	2.96645e-08	chr5	3339467	3339468	.	.	.	.	CGI:chr5:3326214-3326531	.
cg02349468	0.515461	0.729415	-0.213954	1.08163e-07	2.21909e-07	chr5	1093546	1093547	SLC12A7	protein_coding	ENST00000264930.8	18490	CGI:chr5:1093464-1093722	Island
cg01848457	0.233391	0.44734	-0.213949	1.40031e-13	3.1807e-12	chr12	104304205	104304206	EID3;TXNRD1;TXNRD1;TXNRD1;TXNRD1;TXNRD1;TXNRD1;TXNRD1;TXNRD1;TXNRD1;TXNRD1;TXNRD1;TXNRD1;TXNRD1;TXNRD1;TXNRD1;TXNRD1;TXNRD1;TXNRD1;TXNRD1	protein_coding;protein_coding;protein_coding;protein_coding;protein_coding;protein_coding;protein_coding;protein_coding;protein_coding;protein_coding;protein_coding;protein_coding;protein_coding;protein_coding;protein_coding;protein_coding;protein_coding;protein_coding;protein_coding;protein_coding	ENST00000527879.1;ENST00000354940.9;ENST00000388854.6;ENST00000397736.5;ENST00000429002.5;ENST00000503506.5;ENST00000524698.4;ENST00000525566.4;ENST00000526266.4;ENST00000526390.4;ENST00000526580.4;ENST00000526691.4;ENST00000527335.4;ENST00000527688.4;ENST00000528079.5;ENST00000529546.4;ENST00000529751.1;ENST00000529784.4;ENST00000531689.4;ENST00000531691.4	465;17522;17522;17522;88425;17522;16836;88425;18202;17214;17147;17323;15309;15486;17155;17182;17180;16882;17209;17279	CGI:chr12:104303570-104304206	Island
cg08846467	0.537212	0.751125	-0.213913	1.68197e-07	3.21241e-07	chr16	1580803	1580804	IFT140;IFT140;IFT140;IFT140;LA16c-395F10.2;LA16c-425C2.1	protein_coding;protein_coding;protein_coding;protein_coding;antisense;sense_intronic	ENST00000397417.5;ENST00000426508.5;ENST00000439987.5;ENST00000565298.4;ENST00000563162.1;ENST00000568149.1	29891;31308;29891;3461;275;-494	CGI:chr16:1554963-1555344	.
cg07795964	0.646576	0.860222	-0.213646	6.74965e-14	1.84078e-12	chr4	2064593	2064594	NAT8L;NAT8L	protein_coding;protein_coding	ENST00000331662.3;ENST00000423729.2	4780;5080	CGI:chr4:2063815-2064671	Island
cg09134205	0.469376	0.682991	-0.213615	5.91509e-10	2.98571e-09	chr7	154306130	154306131	DPP6;DPP6;DPP6;DPP6;DPP6;DPP6;DPP6;DPP6	protein_coding;protein_coding;protein_coding;protein_coding;protein_coding;protein_coding;protein_coding;protein_coding	ENST00000332007.6;ENST00000377770.6;ENST00000404039.4;ENST00000406326.4;ENST00000427557.1;ENST00000462622.4;ENST00000496611.1;ENST00000619756.3	1019;253449;419032;253711;687;1019;917;867	CGI:chr7:154304879-154305196	S_Shore
cg02579140	0.607533	0.821071	-0.213538	0.000218186	0.000222382	chr10	3118790	3118791	PFKP;PFKP;PFKP	protein_coding;protein_coding;protein_coding	ENST00000381075.5;ENST00000381125.7;ENST00000413079.1	50162;51269;5331	CGI:chr10:3118696-3118915	Island
cg21234561	0.129663	0.343199	-0.213536	2.4748e-13	5.07733e-12	chr12	104303748	104303749	EID3;TXNRD1;TXNRD1;TXNRD1;TXNRD1;TXNRD1;TXNRD1;TXNRD1;TXNRD1;TXNRD1;TXNRD1;TXNRD1;TXNRD1;TXNRD1;TXNRD1;TXNRD1;TXNRD1;TXNRD1;TXNRD1;TXNRD1	protein_coding;protein_coding;protein_coding;protein_coding;protein_coding;protein_coding;protein_coding;protein_coding;protein_coding;protein_coding;protein_coding;protein_coding;protein_coding;protein_coding;protein_coding;protein_coding;protein_coding;protein_coding;protein_coding;protein_coding	ENST00000527879.1;ENST00000354940.9;ENST00000388854.6;ENST00000397736.5;ENST00000429002.5;ENST00000503506.5;ENST00000524698.4;ENST00000525566.4;ENST00000526266.4;ENST00000526390.4;ENST00000526580.4;ENST00000526691.4;ENST00000527335.4;ENST00000527688.4;ENST00000528079.5;ENST00000529546.4;ENST00000529751.1;ENST00000529784.4;ENST00000531689.4;ENST00000531691.4	8;17065;17065;17065;87968;17065;16379;87968;17745;16757;16690;16866;14852;15029;16698;16725;16723;16425;16752;16822	CGI:chr12:104303570-104304206	Island
cg18361418	0.354027	0.567555	-0.213528	1.53394e-08	4.39277e-08	chr6	28531899	28531900	GPX5;GPX5;GPX5;GPX5	protein_coding;protein_coding;protein_coding;protein_coding	ENST00000412168.5;ENST00000442674.5;ENST00000469384.1;ENST00000483784.1	5973;3572;5886;3567	CGI:chr6:28587086-28587347	.
cg21398280	0.62576	0.839265	-0.213505	2.96542e-05	3.30878e-05	chr8	926927	926928	ERICH1-AS1;ERICH1-AS1;ERICH1-AS1	antisense;antisense;antisense	ENST00000522092.4;ENST00000524139.4;ENST00000578889.1	189275;43728;43598	CGI:chr8:943459-943760	.
cg14195925	0.425035	0.638531	-0.213496	1.71638e-10	1.08244e-09	chr17	79228321	79228322	RBFOX3;RBFOX3;RBFOX3;RBFOX3	protein_coding;protein_coding;protein_coding;protein_coding	ENST00000580155.4;ENST00000582043.4;ENST00000583458.4;ENST00000584778.4	287828;7485;254278;280548	CGI:chr17:79197985-79198187	.
cg09954251	0.52652	0.740003	-0.213483	2.88667e-05	3.22658e-05	chr8	1330806	1330807	.	.	.	.	CGI:chr8:1315257-1318172	.
cg20000220	0.546255	0.759659	-0.213404	3.27689e-09	1.19932e-08	chr8	143718827	143718828	MAPK15;MAPK15;MAPK15;MAPK15;MAPK15;RP11-429J17.5	protein_coding;protein_coding;protein_coding;protein_coding;protein_coding;antisense	ENST00000338033.7;ENST00000395107.7;ENST00000395108.2;ENST00000484654.1;ENST00000533830.1;ENST00000527908.1	2567;2448;2448;2486;-1366;65	CGI:chr8:143718787-143719165	Island
cg24420726	0.677428	0.890807	-0.213379	2.09672e-07	3.84298e-07	chr19	38193679	38193680	SIPA1L3	protein_coding	ENST00000222345.9	286450	CGI:chr19:38209693-38209937	.
cg09192940	0.482306	0.695679	-0.213373	9.3525e-09	2.94465e-08	chr16	268695	268696	AC004754.3;ARHGDIG;ARHGDIG;ARHGDIG;ITFG3;RGS11;RGS11;RGS11;RGS11	protein_coding;protein_coding;protein_coding;protein_coding;protein_coding;protein_coding;protein_coding;protein_coding;protein_coding	ENST00000600536.1;ENST00000412541.4;ENST00000435035.4;ENST00000464609.1;ENST00000301679.5;ENST00000168869.11;ENST00000316163.8;ENST00000397770.6;ENST00000477143.4	19147;-33;-33;-288;33892;7246;7220;7235;6262	CGI:chr16:268618-268902	Island
cg24090529	0.675549	0.888902	-0.213353	0.000116324	0.000121282	chr7	98215598	98215599	TECPR1;TECPR1	protein_coding;protein_coding	ENST00000447648.5;ENST00000490842.4	36654;18245	CGI:chr7:98210550-98212693	S_Shelf
cg00168967	0.523908	0.737199	-0.213291	1.43881e-08	4.20148e-08	chr8	61593001	61593002	ASPH;ASPH;ASPH;ASPH;ASPH;ASPH;ASPH	protein_coding;protein_coding;protein_coding;protein_coding;protein_coding;protein_coding;protein_coding	ENST00000379454.7;ENST00000521499.4;ENST00000522349.4;ENST00000523897.4;ENST00000523927.4;ENST00000524173.4;ENST00000541428.3	121559;44999;96811;50417;87999;58086;96849	CGI:chr8:61713997-61714952	.
cg12499235	0.447368	0.660477	-0.213109	7.33492e-06	9.18309e-06	chr11	2271943	2271944	ASCL2	protein_coding	ENST00000331289.4	-990	CGI:chr11:2268874-2271702	S_Shore
cg06911744	0.482365	0.695444	-0.213079	7.45482e-09	2.40673e-08	chr1	3359943	3359944	PRDM16;PRDM16;PRDM16;PRDM16;PRDM16;PRDM16	protein_coding;protein_coding;protein_coding;protein_coding;protein_coding;protein_coding	ENST00000270722.8;ENST00000378391.5;ENST00000463591.1;ENST00000511072.4;ENST00000512462.4;ENST00000514189.4	290731;290745;115810;290774;122011;290731	CGI:chr1:3358465-3358720	S_Shore
cg13979884	0.309293	0.522253	-0.21296	8.13496e-13	1.36154e-11	chr9	71446255	71446256	TRPM3;TRPM3	protein_coding;protein_coding	ENST00000354500.5;ENST00000357533.5	650;581	CGI:chr9:71446597-71447181	N_Shore
cg23010538	0.215347	0.428235	-0.212888	1.02139e-05	1.24099e-05	chr1	190478160	190478161	BRINP3;LINC01351;LINC01351	protein_coding;lincRNA;lincRNA	ENST00000367462.3;ENST00000424735.1;ENST00000436905.4	-530;-847;-392	CGI:chr1:192808502-192809068	.
cg08957001	0.486632	0.699477	-0.212845	5.55448e-07	9.29645e-07	chr8	142252293	142252294	TSNARE1;TSNARE1;TSNARE1	protein_coding;protein_coding;protein_coding	ENST00000307180.4;ENST00000520166.4;ENST00000524325.4	150890;102471;150948	CGI:chr8:142251686-142252158	S_Shore
cg07075238	0.463332	0.676131	-0.212799	1.71601e-05	2.00254e-05	chr17	74114218	74114219	RP11-101O21.1;RP11-101O21.1	lincRNA;lincRNA	ENST00000581028.4;ENST00000584003.1	-1318;39995	CGI:chr17:74203793-74204289	.
cg13875506	0.545483	0.758248	-0.212765	6.78625e-09	2.21336e-08	chr11	16922026	16922027	PLEKHA7;PLEKHA7;PLEKHA7;PLEKHA7	protein_coding;protein_coding;protein_coding;protein_coding	ENST00000355661.6;ENST00000529213.1;ENST00000531066.4;ENST00000532079.1	92387;91317;92418;92387	CGI:chr11:16924845-16925851	N_Shelf
cg04655136	0.610932	0.823415	-0.212483	3.1701e-08	8.16269e-08	chr19	48297179	48297180	CCDC114;CCDC114;CCDC114	protein_coding;protein_coding;protein_coding	ENST00000315396.7;ENST00000474199.4;ENST00000497273.1	22897;23207;6223	CGI:chr19:48291096-48291470	.
cg18496841	0.561777	0.774257	-0.21248	8.51127e-07	1.35511e-06	chr8	1546859	1546860	DLGAP2;DLGAP2	protein_coding;protein_coding	ENST00000421627.5;ENST00000612087.1	45492;45492	CGI:chr8:1546939-1547167	N_Shore
cg07916654	0.602304	0.814724	-0.21242	5.31415e-07	8.9496e-07	chr10	133127725	133127726	GPR123;GPR123;GPR123	protein_coding;protein_coding;protein_coding	ENST00000392606.2;ENST00000392607.6;ENST00000607359.4	25478;39819;56795	CGI:chr10:133126830-133127371	S_Shore
cg02970919	0.662493	0.874758	-0.212265	1.86533e-05	2.157e-05	chr4	185379791	185379792	LRP2BP;LRP2BP;LRP2BP;LRP2BP;RP11-714G18.1	protein_coding;protein_coding;protein_coding;protein_coding;antisense	ENST00000328559.10;ENST00000505916.4;ENST00000510776.4;ENST00000511404.1;ENST00000514884.1	-792;16109;-772;-943;9065	CGI:chr4:185395989-185397101	.
cg06041852	0.467941	0.680188	-0.212247	2.4892e-09	9.77241e-09	chr10	132920630	132920631	CFAP46	protein_coding	ENST00000368586.8	21956	CGI:chr10:132919097-132920273	S_Shore
cg14431072	0.49204	0.704272	-0.212232	4.21664e-06	5.58705e-06	chr6	32059889	32059890	TNXB;TNXB	protein_coding;protein_coding	ENST00000375244.6;ENST00000611016.1	49486;2596	CGI:chr6:32079038-32079317	.
cg19717586	0.278641	0.490825	-0.212184	5.1539e-05	5.53696e-05	chr11	131911363	131911364	NTM;NTM;NTM;NTM;NTM;NTM;NTM;NTM;NTM;NTM	protein_coding;protein_coding;protein_coding;protein_coding;protein_coding;protein_coding;protein_coding;protein_coding;protein_coding;protein_coding	ENST00000374784.4;ENST00000374786.4;ENST00000374791.6;ENST00000425719.5;ENST00000436745.4;ENST00000463395.4;ENST00000470371.1;ENST00000479431.1;ENST00000498764.4;ENST00000550167.4	-106;359;540884;-100;540736;1665;543;-79;1318;455899	CGI:chr11:131910458-131911638	Island
cg13639452	0.644673	0.856819	-0.212146	8.75196e-06	1.07664e-05	chr9	134731984	134731985	COL5A1;COL5A1;COL5A1	protein_coding;protein_coding;protein_coding	ENST00000371817.6;ENST00000469093.1;ENST00000618395.3	90209;390;90178	CGI:chr9:134768667-134768896	.
cg24377694	0.4952	0.707254	-0.212054	6.02136e-08	1.40278e-07	chr20	1994726	1994727	PDYN;PDYN;PDYN;RP4-684O24.5	protein_coding;protein_coding;protein_coding;antisense	ENST00000217305.2;ENST00000539905.4;ENST00000540134.4;ENST00000446562.1	-668;-440;-977;47479	CGI:chr20:1947072-1947472	.
cg24311564	0.553718	0.765719	-0.212001	3.93965e-08	9.60007e-08	chr7	154750603	154750604	DPP6;DPP6;DPP6;DPP6	protein_coding;protein_coding;protein_coding;protein_coding	ENST00000332007.6;ENST00000377770.6;ENST00000404039.4;ENST00000427557.1	445492;697922;863505;445160	CGI:chr7:154750349-154750638	Island
cg05940691	0.460513	0.67247	-0.211957	6.3237e-05	6.72554e-05	chr1	241749462	241749463	WDR64;WDR64;WDR64;WDR64;WDR64	protein_coding;protein_coding;protein_coding;protein_coding;protein_coding	ENST00000366552.5;ENST00000414635.4;ENST00000425826.2;ENST00000437684.5;ENST00000472717.5	97183;65881;-86;65881;7913	CGI:chr1:241847849-241848442	.
cg00588621	0.158171	0.370054	-0.211883	1.18656e-11	1.25775e-10	chr12	104303842	104303843	EID3;TXNRD1;TXNRD1;TXNRD1;TXNRD1;TXNRD1;TXNRD1;TXNRD1;TXNRD1;TXNRD1;TXNRD1;TXNRD1;TXNRD1;TXNRD1;TXNRD1;TXNRD1;TXNRD1;TXNRD1;TXNRD1;TXNRD1	protein_coding;protein_coding;protein_coding;protein_coding;protein_coding;protein_coding;protein_coding;protein_coding;protein_coding;protein_coding;protein_coding;protein_coding;protein_coding;protein_coding;protein_coding;protein_coding;protein_coding;protein_coding;protein_coding;protein_coding	ENST00000527879.1;ENST00000354940.9;ENST00000388854.6;ENST00000397736.5;ENST00000429002.5;ENST00000503506.5;ENST00000524698.4;ENST00000525566.4;ENST00000526266.4;ENST00000526390.4;ENST00000526580.4;ENST00000526691.4;ENST00000527335.4;ENST00000527688.4;ENST00000528079.5;ENST00000529546.4;ENST00000529751.1;ENST00000529784.4;ENST00000531689.4;ENST00000531691.4	102;17159;17159;17159;88062;17159;16473;88062;17839;16851;16784;16960;14946;15123;16792;16819;16817;16519;16846;16916	CGI:chr12:104303570-104304206	Island
cg07701049	0.553072	0.764884	-0.211812	3.58101e-07	6.36179e-07	chr8	140549847	140549848	AGO2;AGO2;AGO2	protein_coding;protein_coding;protein_coding	ENST00000220592.8;ENST00000519980.4;ENST00000523609.4	85773;85700;85700	CGI:chr8:140549065-140549269	S_Shore
cg04641165	0.596168	0.807974	-0.211806	9.45552e-07	1.48854e-06	chr6	16138886	16138887	MYLIP;MYLIP	protein_coding;protein_coding	ENST00000349606.4;ENST00000356840.6	9714;9760	CGI:chr6:16128761-16129792	.
cg04930921	0.59422	0.806014	-0.211794	8.41947e-09	2.69085e-08	chr4	3446069	3446070	HGFAC;HGFAC;HGFAC;HGFAC	protein_coding;protein_coding;protein_coding;protein_coding	ENST00000382774.6;ENST00000506132.1;ENST00000509689.4;ENST00000511533.1	4181;168;1719;4093	CGI:chr4:3447923-3448268	N_Shore
cg21194454	0.661871	0.873649	-0.211778	3.39301e-08	8.61524e-08	*	-1	-1	.	.	.	.	.	.
cg04297457	0.422637	0.634413	-0.211776	3.84972e-08	9.50675e-08	chr16	15889266	15889267	FOPNL;FOPNL;FOPNL;FOPNL;FOPNL;FOPNL;FOPNL;FOPNL;FOPNL	protein_coding;protein_coding;protein_coding;protein_coding;protein_coding;protein_coding;protein_coding;protein_coding;protein_coding	ENST00000255759.9;ENST00000572415.4;ENST00000573087.4;ENST00000573396.4;ENST00000573429.4;ENST00000573968.4;ENST00000575073.4;ENST00000575744.4;ENST00000575938.1	-650;-642;-640;-666;-651;-663;-640;-662;-672	CGI:chr16:15888388-15888815	S_Shore
cg27144670	0.448356	0.660107	-0.211751	4.072e-10	2.23258e-09	chr15	51869241	51869242	TMOD3;TMOD3	protein_coding;protein_coding	ENST00000308580.10;ENST00000544199.4	39610;6402	CGI:chr15:51829619-51830255	.
cg01451880	0.715964	0.927656	-0.211692	2.33252e-05	2.68139e-05	chr3	45759552	45759553	SLC6A20;SLC6A20;SLC6A20;SLC6A20	protein_coding;protein_coding;protein_coding;protein_coding	ENST00000353278.7;ENST00000358525.7;ENST00000456124.5;ENST00000473146.4	36919;36984;36932;12788	CGI:chr3:45795988-45796764	.
cg15530916	0.381521	0.593046	-0.211525	1.21624e-09	5.33468e-09	chr5	2005972	2005973	.	.	.	.	CGI:chr5:2007201-2007765	N_Shore
cg14802502	0.430268	0.641721	-0.211453	2.71082e-05	3.05688e-05	chr5	2338502	2338503	.	.	.	.	CGI:chr5:2180137-2180353	.
cg13649103	0.577445	0.788699	-0.211254	1.45532e-08	4.22641e-08	chr9	134842492	134842493	COL5A1;COL5A1	protein_coding;protein_coding	ENST00000371817.6;ENST00000618395.3	200717;200686	CGI:chr9:134842307-134842629	Island
cg18874111	0.604523	0.815691	-0.211168	3.78034e-06	5.06168e-06	chr6	48701998	48701999	RP1-281E18.1	processed_pseudogene	ENST00000619841.1	-125	CGI:chr6:48068401-48068894	.
cg11951974	0.616433	0.827572	-0.211139	1.2255e-07	2.451e-07	chr4	8606759	8606760	CPZ;CPZ;CPZ;CPZ;GPR78;GPR78	protein_coding;protein_coding;protein_coding;protein_coding;protein_coding;protein_coding	ENST00000315782.6;ENST00000360986.7;ENST00000382480.5;ENST00000515606.1;ENST00000513120.2;ENST00000514302.4	14002;14098;14098;14032;4788;28433	CGI:chr4:8592685-8593050	.
cg15111573	0.619007	0.82995	-0.210943	7.8191e-08	1.73273e-07	chr4	6302756	6302757	WFS1;WFS1;WFS1	protein_coding;protein_coding;protein_coding	ENST00000226760.4;ENST00000503569.4;ENST00000507765.1	32905;32906;14268	CGI:chr4:6301806-6302483	S_Shore
cg03141620	0.0584219	0.269227	-0.210805	3.29396e-11	2.84929e-10	chr2	172085368	172085369	DLX1;DLX1;DLX1;DLX1;DLX1;DLX1	protein_coding;protein_coding;protein_coding;protein_coding;protein_coding;protein_coding	ENST00000341900.6;ENST00000361609.4;ENST00000361725.4;ENST00000409492.1;ENST00000469444.5;ENST00000475989.2	-169;627;141;-190;618;-900	CGI:chr2:172084514-172085398	Island
cg07737175	0.50389	0.714555	-0.210665	3.5319e-10	1.9969e-09	chr13	112116583	112116584	.	.	.	.	CGI:chr13:112106551-112106799	.
cg11510586	0.297457	0.508104	-0.210647	1.58076e-07	3.05582e-07	chr9	69412493	69412494	.	.	.	.	CGI:chr9:69411987-69412512	Island
cg12387106	0.538756	0.749201	-0.210445	3.33089e-10	1.90851e-09	chr12	132601663	132601664	.	.	.	.	CGI:chr12:132601240-132601469	S_Shore
cg07640336	0.669104	0.879457	-0.210353	2.00433e-07	3.69494e-07	chr12	132192951	132192952	.	.	.	.	CGI:chr12:132189145-132190696	S_Shelf
cg25601879	0.486452	0.696761	-0.210309	6.73705e-05	7.14127e-05	chr10	130359536	130359537	.	.	.	.	CGI:chr10:130202967-130203284	.
cg22446206	0.365787	0.57605	-0.210263	2.99848e-09	1.14882e-08	chr1	185774655	185774656	HMCN1	protein_coding	ENST00000271588.7	40103	CGI:chr1:185316197-185317234	.
cg06900571	0.607014	0.817259	-0.210245	3.89977e-06	5.19969e-06	chr8	140238483	140238484	TRAPPC9;TRAPPC9;TRAPPC9;TRAPPC9;TRAPPC9;TRAPPC9;TRAPPC9	protein_coding;protein_coding;protein_coding;protein_coding;protein_coding;protein_coding;protein_coding	ENST00000389328.7;ENST00000438773.2;ENST00000517667.4;ENST00000518839.1;ENST00000520532.4;ENST00000520857.4;ENST00000521667.4	220097;219280;11;24248;24249;212448;52769	CGI:chr8:140338741-140339096	.
cg19787694	0.468664	0.678773	-0.210109	9.88214e-10	4.52161e-09	chr19	846117	846118	PRTN3;PRTN3	protein_coding;protein_coding	ENST00000234347.8;ENST00000544537.2	5156;2775	CGI:chr19:846011-846435	Island
cg11617144	0.689721	0.899824	-0.210103	8.5227e-07	1.35511e-06	chr8	144504389	144504390	CTD-2517M22.14;CTD-2517M22.14;GPT;GPT;GPT;GPT;GPT;GPT;GPT	processed_transcript;processed_transcript;protein_coding;protein_coding;protein_coding;protein_coding;protein_coding;protein_coding;protein_coding	ENST00000527086.1;ENST00000528690.1;ENST00000354769.7;ENST00000394955.2;ENST00000527165.4;ENST00000527961.1;ENST00000528431.4;ENST00000531330.4;ENST00000534702.4	1056;710;248;306;651;167;1415;248;248	CGI:chr8:144505007-144509987	N_Shore
cg13071185	0.544241	0.754337	-0.210096	1.53413e-06	2.27969e-06	chr11	860134	860135	RP11-1391J7.1;TSPAN4;TSPAN4;TSPAN4;TSPAN4;TSPAN4;TSPAN4;TSPAN4;TSPAN4;TSPAN4;TSPAN4;TSPAN4;TSPAN4;TSPAN4;TSPAN4;TSPAN4;TSPAN4;TSPAN4	antisense;protein_coding;protein_coding;protein_coding;protein_coding;protein_coding;protein_coding;protein_coding;protein_coding;protein_coding;protein_coding;protein_coding;protein_coding;protein_coding;protein_coding;protein_coding;protein_coding;protein_coding	ENST00000506172.2;ENST00000346501.7;ENST00000397396.4;ENST00000397397.5;ENST00000397404.4;ENST00000397406.4;ENST00000397408.4;ENST00000397411.5;ENST00000409531.4;ENST00000409543.5;ENST00000464987.4;ENST00000524895.4;ENST00000525201.4;ENST00000525334.4;ENST00000526055.4;ENST00000527644.1;ENST00000530404.4;ENST00000532375.4	-338;12936;17309;17325;15687;16052;17192;17321;11323;16016;12936;12936;15980;16794;12936;10317;16818;12936	CGI:chr11:858575-859550	S_Shore
cg17211761	0.447305	0.657359	-0.210054	1.73728e-05	2.01995e-05	chr17	1193332	1193333	ABR;ABR	protein_coding;protein_coding	ENST00000574139.4;ENST00000575934.4	35673;35673	CGI:chr17:1203276-1204085	.
cg20704537	0.604127	0.814117	-0.20999	1.4564e-05	1.73459e-05	chr13	112221175	112221176	.	.	.	.	CGI:chr13:112241113-112241394	.
cg06833732	0.1848	0.394763	-0.209963	1.4102e-07	2.77674e-07	chr5	175872032	175872033	CPLX2;CPLX2;CPLX2;CPLX2;CPLX2;CPLX2;CPLX2	protein_coding;protein_coding;protein_coding;protein_coding;protein_coding;protein_coding;protein_coding	ENST00000359546.7;ENST00000393745.6;ENST00000502265.4;ENST00000509837.4;ENST00000512824.4;ENST00000514150.4;ENST00000515502.1	75721;533;-779;10403;453;355;75289	CGI:chr5:175871512-175872622	Island
cg16169950	0.602964	0.812927	-0.209963	1.83458e-07	3.44187e-07	chr5	165297	165298	PLEKHG4B	protein_coding	ENST00000283426.9	25038	CGI:chr5:164595-166543	Island
cg05394294	0.55278	0.762717	-0.209937	2.73678e-05	3.06983e-05	chr10	3118734	3118735	PFKP;PFKP;PFKP	protein_coding;protein_coding;protein_coding	ENST00000381075.5;ENST00000381125.7;ENST00000413079.1	50106;51213;5275	CGI:chr10:3118696-3118915	Island
cg27100370	0.374063	0.583919	-0.209856	3.77359e-09	1.35593e-08	chr19	1082613	1082614	HMHA1;HMHA1;HMHA1;HMHA1;HMHA1;HMHA1;HMHA1;HMHA1;HMHA1;HMHA1;HMHA1;HMHA1	protein_coding;protein_coding;protein_coding;protein_coding;protein_coding;protein_coding;protein_coding;protein_coding;protein_coding;protein_coding;protein_coding;protein_coding	ENST00000313093.5;ENST00000539243.5;ENST00000543365.4;ENST00000586378.4;ENST00000586866.4;ENST00000586937.2;ENST00000587602.4;ENST00000590214.4;ENST00000590512.1;ENST00000590577.2;ENST00000591169.2;ENST00000592297.2	15446;16689;11391;-172;15114;1197;15295;15285;91;5125;-327;-229	CGI:chr19:1079683-1083431	Island
cg23788733	0.623058	0.832779	-0.209721	1.36124e-06	2.03706e-06	chr17	81181356	81181357	AATK-AS1;AATK-AS1	antisense;antisense	ENST00000414089.4;ENST00000571031.1	15848;15839	CGI:chr17:81190588-81191384	.
cg15775406	0.705951	0.915654	-0.209703	0.000222061	0.000225248	chr7	1293976	1293977	.	.	.	.	CGI:chr7:1289745-1290572	S_Shelf
cg09477407	0.177173	0.386786	-0.209613	1.94979e-11	1.72231e-10	chr12	104303767	104303768	EID3;TXNRD1;TXNRD1;TXNRD1;TXNRD1;TXNRD1;TXNRD1;TXNRD1;TXNRD1;TXNRD1;TXNRD1;TXNRD1;TXNRD1;TXNRD1;TXNRD1;TXNRD1;TXNRD1;TXNRD1;TXNRD1;TXNRD1	protein_coding;protein_coding;protein_coding;protein_coding;protein_coding;protein_coding;protein_coding;protein_coding;protein_coding;protein_coding;protein_coding;protein_coding;protein_coding;protein_coding;protein_coding;protein_coding;protein_coding;protein_coding;protein_coding;protein_coding	ENST00000527879.1;ENST00000354940.9;ENST00000388854.6;ENST00000397736.5;ENST00000429002.5;ENST00000503506.5;ENST00000524698.4;ENST00000525566.4;ENST00000526266.4;ENST00000526390.4;ENST00000526580.4;ENST00000526691.4;ENST00000527335.4;ENST00000527688.4;ENST00000528079.5;ENST00000529546.4;ENST00000529751.1;ENST00000529784.4;ENST00000531689.4;ENST00000531691.4	27;17084;17084;17084;87987;17084;16398;87987;17764;16776;16709;16885;14871;15048;16717;16744;16742;16444;16771;16841	CGI:chr12:104303570-104304206	Island
cg02889617	0.412431	0.621959	-0.209528	5.36271e-10	2.75055e-09	chr16	30821473	30821474	RP11-2C24.5;RP11-2C24.7	processed_pseudogene;lincRNA	ENST00000568660.1;ENST00000621583.1	638;134	CGI:chr16:30820965-30821239	S_Shore
cg01454538	0.577608	0.787112	-0.209504	3.83817e-08	9.50675e-08	chr2	1687393	1687394	PXDN;PXDN;PXDN;PXDN;PXDN	protein_coding;protein_coding;protein_coding;protein_coding;protein_coding	ENST00000252804.7;ENST00000425171.1;ENST00000433670.4;ENST00000447941.4;ENST00000485177.1	57114;57110;57050;5178;57460	CGI:chr2:1666219-1666431	.
cg06419964	0.41305	0.622438	-0.209388	3.16839e-08	8.16269e-08	chr17	36608858	36608859	MRM1;MRM1	protein_coding;protein_coding	ENST00000612760.1;ENST00000614766.3	6895;7285	CGI:chr17:36601404-36602361	.
cg09350880	0.49461	0.703967	-0.209357	4.50741e-09	1.558e-08	chr14	72670265	72670266	DPF3;DPF3;DPF3;DPF3;DPF3;DPF3;DPF3	protein_coding;protein_coding;protein_coding;protein_coding;protein_coding;protein_coding;protein_coding	ENST00000366353.7;ENST00000381216.7;ENST00000541685.4;ENST00000556509.4;ENST00000557704.4;ENST00000610283.3;ENST00000614862.3	222385;223837;223852;223824;53841;222385;223852	CGI:chr14:72892081-72894226	.
cg15059225	0.333323	0.542673	-0.20935	6.26831e-13	1.1074e-11	chr6	17311925	17311926	.	.	.	.	CGI:chr6:17280508-17282103	.
cg15122358	0.591073	0.800357	-0.209284	9.04974e-12	1.02779e-10	chr10	132993007	132993008	.	.	.	.	CGI:chr10:132993672-132993941	N_Shore
cg05632088	0.393925	0.603209	-0.209284	1.1566e-07	2.34267e-07	chr7	64207068	64207069	ZNF735;ZNF735	protein_coding;protein_coding	ENST00000429565.3;ENST00000623629.1	-23;-65	CGI:chr7:64192252-64192584	.
cg24659037	0.511263	0.720537	-0.209274	1.39556e-06	2.08351e-06	chr6	167664221	167664222	.	.	.	.	CGI:chr6:167662190-167662649	S_Shore
cg07876051	0.610576	0.81977	-0.209194	0.000526504	0.000528999	chr10	3116953	3116954	PFKP;PFKP;PFKP	protein_coding;protein_coding;protein_coding	ENST00000381075.5;ENST00000381125.7;ENST00000413079.1	48325;49432;3494	CGI:chr10:3118696-3118915	N_Shore
cg21449256	0.631367	0.840489	-0.209122	6.01773e-06	7.70076e-06	chr8	1387978	1387979	.	.	.	.	CGI:chr8:1393054-1394000	.
cg22868951	0.581329	0.790381	-0.209052	1.09841e-07	2.24153e-07	chr4	128846433	128846434	JADE1;JADE1;JADE1;JADE1;JADE1;JADE1;JADE1;JADE1;JADE1;JADE1;JADE1;JADE1;JADE1	protein_coding;protein_coding;protein_coding;protein_coding;protein_coding;protein_coding;protein_coding;protein_coding;protein_coding;protein_coding;protein_coding;protein_coding;protein_coding	ENST00000226319.9;ENST00000413543.5;ENST00000452328.5;ENST00000503785.4;ENST00000504089.4;ENST00000507833.4;ENST00000508997.1;ENST00000510308.4;ENST00000511647.4;ENST00000511925.4;ENST00000512960.4;ENST00000610919.3;ENST00000611140.3	36809;35106;36617;36512;36588;34588;14999;35144;36729;35140;36513;35162;34588	CGI:chr4:128811167-128812830	.
cg21935981	0.373699	0.582738	-0.209039	5.3191e-07	8.9496e-07	chr22	45212584	45212585	KIAA0930;KIAA0930;KIAA0930;KIAA0930;KIAA0930;KIAA0930;KIAA0930;KIAA0930;KIAA0930;KIAA0930;KIAA0930	protein_coding;protein_coding;protein_coding;protein_coding;protein_coding;protein_coding;protein_coding;protein_coding;protein_coding;protein_coding;protein_coding	ENST00000251993.10;ENST00000336156.8;ENST00000391627.5;ENST00000414854.4;ENST00000417906.1;ENST00000424508.4;ENST00000440039.4;ENST00000486640.4;ENST00000488038.4;ENST00000492273.1;ENST00000496226.1	-95;28186;14320;23694;28159;916;-502;22830;-126;-166;-138	CGI:chr22:45202840-45203199	.
cg03145062	0.583093	0.792079	-0.208986	3.93044e-07	6.88639e-07	chr17	52111089	52111090	CA10;CA10;CA10;CA10;CA10;CA10;CA10	protein_coding;protein_coding;protein_coding;protein_coding;protein_coding;protein_coding;protein_coding	ENST00000285273.7;ENST00000442502.5;ENST00000451037.5;ENST00000570565.4;ENST00000571371.4;ENST00000573294.1;ENST00000575181.1	48713;48929;47639;48914;46975;46975;48895	CGI:chr17:52157815-52158874	.
cg06423211	0.259027	0.468007	-0.20898	8.03397e-10	3.81314e-09	chr19	551401	551402	.	.	.	.	CGI:chr19:551290-551542	Island
cg21531873	0.581796	0.790773	-0.208977	5.88835e-06	7.55038e-06	chr12	110340811	110340812	ATP2A2;ATP2A2;ATP2A2;ATP2A2	protein_coding;protein_coding;protein_coding;protein_coding	ENST00000308664.9;ENST00000377685.8;ENST00000539276.5;ENST00000548169.2	59694;59513;59129;48761	CGI:chr12:110280587-110282257	.
cg03847932	0.414303	0.623252	-0.208949	7.96831e-06	9.87884e-06	chr3	72996405	72996406	GXYLT2;PPP4R2;PPP4R2;PPP4R2;PPP4R2;PPP4R2;PPP4R2	protein_coding;protein_coding;protein_coding;protein_coding;protein_coding;protein_coding;protein_coding	ENST00000491839.1;ENST00000356692.8;ENST00000470976.1;ENST00000476505.2;ENST00000482242.4;ENST00000488810.4;ENST00000495566.1	41189;-381;-414;-954;-399;-435;-573	CGI:chr3:72996683-72997366	N_Shore
cg24747866	0.551823	0.760728	-0.208905	3.84394e-06	5.13602e-06	chr10	132280566	132280567	STK32C;STK32C;STK32C	protein_coding;protein_coding;protein_coding	ENST00000298630.6;ENST00000368620.2;ENST00000368622.4	27375;51282;26649	CGI:chr10:132281983-132282316	N_Shore
cg05056638	0.499566	0.708391	-0.208825	5.45511e-05	5.83101e-05	chr8	24943311	24943312	.	.	.	.	CGI:chr8:24942190-24942634	S_Shore
cg22954449	0.189363	0.398159	-0.208796	7.44759e-07	1.19759e-06	chr5	5139888	5139889	ADAMTS16;ADAMTS16;ADAMTS16;CTD-2297D10.2	protein_coding;protein_coding;protein_coding;antisense	ENST00000274181.7;ENST00000433402.2;ENST00000511368.4;ENST00000512155.1	-443;-581;-443;167	CGI:chr5:5139328-5140828	Island
cg15914908	0.471561	0.680251	-0.20869	8.24618e-10	3.8563e-09	chr12	132435882	132435883	.	.	.	.	CGI:chr12:132434097-132434343	S_Shore
cg09966455	0.544813	0.753438	-0.208625	9.34897e-09	2.94465e-08	chr20	63298913	63298914	COL20A1;COL20A1;COL20A1	protein_coding;protein_coding;protein_coding	ENST00000358894.9;ENST00000422202.4;ENST00000479501.4	5726;3872;5688	CGI:chr20:63295842-63296130	S_Shelf
cg16720890	0.659731	0.868332	-0.208601	1.86787e-06	2.71225e-06	chr2	241852930	241852931	PDCD1;PDCD1;PDCD1	protein_coding;protein_coding;protein_coding	ENST00000334409.8;ENST00000343705.3;ENST00000418831.1	5979;-43;5936	CGI:chr2:241852701-241852931	Island
cg24102792	0.460774	0.669145	-0.208371	2.59408e-09	1.01217e-08	chr13	111398891	111398892	.	.	.	.	CGI:chr13:111402078-111402297	N_Shelf
cg23012192	0.646293	0.854656	-0.208363	3.29966e-09	1.19932e-08	chr5	179823985	179823986	SQSTM1;SQSTM1;SQSTM1;SQSTM1;SQSTM1;SQSTM1;SQSTM1;SQSTM1;SQSTM1;SQSTM1	protein_coding;protein_coding;protein_coding;protein_coding;protein_coding;protein_coding;protein_coding;protein_coding;protein_coding;protein_coding	ENST00000360718.5;ENST00000389805.7;ENST00000422245.4;ENST00000464493.4;ENST00000466342.1;ENST00000485412.1;ENST00000504627.1;ENST00000508284.4;ENST00000510187.4;ENST00000514093.4	1499;3225;5106;3377;126;419;3079;3106;3063;17576	CGI:chr5:179820784-179821711	S_Shelf
cg06072835	0.459859	0.668105	-0.208246	1.5462e-07	3.00729e-07	chr16	86078413	86078414	.	.	.	.	CGI:chr16:85972589-85974081	.
cg24715245	0.245355	0.453591	-0.208236	4.59777e-16	2.92418e-14	chr4	41256777	41256778	UCHL1;UCHL1;UCHL1;UCHL1;UCHL1;UCHL1;UCHL1;UCHL1;UCHL1;UCHL1;UCHL1-AS1;UCHL1-AS1	protein_coding;protein_coding;protein_coding;protein_coding;protein_coding;protein_coding;protein_coding;protein_coding;protein_coding;protein_coding;antisense;antisense	ENST00000284440.7;ENST00000381760.7;ENST00000472501.4;ENST00000503431.4;ENST00000504818.4;ENST00000505232.4;ENST00000508768.4;ENST00000512419.4;ENST00000512788.1;ENST00000514924.4;ENST00000507190.1;ENST00000510073.1	-57;-132;-170;7;-157;-156;-164;-135;-169;363;-49;-55	CGI:chr4:41256742-41257850	Island
cg06580523	0.44611	0.654305	-0.208195	4.68109e-10	2.48098e-09	chr12	132331868	132331869	RP13-895J2.8	TEC	ENST00000623871.1	-138	CGI:chr12:132328863-132329990	S_Shore
cg19648686	0.62269	0.830852	-0.208162	1.64942e-09	6.94723e-09	chr10	5002800	5002801	AKR1C1;AKR1C2;AKR1C2;AKR1C2;AKR1C2;AKR1C2;AKR1C2;AKR1C2	protein_coding;protein_coding;protein_coding;protein_coding;protein_coding;protein_coding;protein_coding;protein_coding	ENST00000434459.5;ENST00000380753.7;ENST00000407674.4;ENST00000421196.6;ENST00000455190.2;ENST00000460124.4;ENST00000604184.1;ENST00000604507.4	39354;1224;132427;1061;1215;1224;1062;15156	CGI:chr10:4825933-4826605	.
cg16865953	0.27947	0.487538	-0.208068	1.63972e-06	2.41403e-06	chr2	66581129	66581130	AC007392.3	lincRNA	ENST00000433396.4	7098	CGI:chr2:66581436-66582272	N_Shore
cg03566291	0.59921	0.807239	-0.208029	3.30923e-06	4.46851e-06	chr21	43411160	43411161	.	.	.	.	CGI:chr21:43410965-43411356	Island
cg20708135	0.387824	0.595796	-0.207972	6.07312e-13	1.10357e-11	chr11	76782445	76782446	TSKU;TSKU;TSKU	protein_coding;protein_coding;protein_coding	ENST00000333090.4;ENST00000533752.1;ENST00000612930.1	-795;193;131	CGI:chr11:76783131-76784628	N_Shore
cg04004158	0.239845	0.447565	-0.20772	6.87063e-14	1.84078e-12	chr16	1102474	1102475	.	.	.	.	CGI:chr16:1102947-1103355	N_Shore
cg25941751	0.405687	0.613399	-0.207712	3.53315e-08	8.917e-08	chr2	46386405	46386406	EPAS1;EPAS1	protein_coding;protein_coding	ENST00000263734.4;ENST00000466465.4	89002;6704	CGI:chr2:46296650-46300001	.
cg08502239	0.650789	0.858455	-0.207666	3.32542e-05	3.67383e-05	chr17	9904805	9904806	RCVRN	protein_coding	ENST00000226193.5	817	CGI:chr17:9904750-9905022	Island
cg01915283	0.619546	0.827211	-0.207665	5.18227e-06	6.71268e-06	chr22	39315357	39315358	RPL3;RPL3;RPL3;RPL3;RPL3;RPL3;RPL3;RPL3;SNORD83A;SNORD83B	protein_coding;protein_coding;protein_coding;protein_coding;protein_coding;protein_coding;protein_coding;protein_coding;snoRNA;snoRNA	ENST00000216146.7;ENST00000401609.4;ENST00000402527.4;ENST00000453303.4;ENST00000465618.4;ENST00000467105.1;ENST00000471290.1;ENST00000481985.4;ENST00000386747.1;ENST00000386745.1	4415;3258;4267;3755;5033;-391;73;130;-49;-1445	CGI:chr22:39319468-39319940	.
cg26014281	0.464072	0.671673	-0.207601	2.09186e-08	5.70997e-08	chr7	157434532	157434533	.	.	.	.	CGI:chr7:157441419-157442548	.
cg03918756	0.593411	0.800993	-0.207582	5.2381e-06	6.7712e-06	chr8	140238533	140238534	TRAPPC9;TRAPPC9;TRAPPC9;TRAPPC9;TRAPPC9;TRAPPC9;TRAPPC9	protein_coding;protein_coding;protein_coding;protein_coding;protein_coding;protein_coding;protein_coding	ENST00000389328.7;ENST00000438773.2;ENST00000517667.4;ENST00000518839.1;ENST00000520532.4;ENST00000520857.4;ENST00000521667.4	220047;219230;-39;24198;24199;212398;52719	CGI:chr8:140338741-140339096	.
cg01226963	0.544667	0.752246	-0.207579	0.000124136	0.000129215	chr8	1101814	1101815	ERICH1-AS1;ERICH1-AS1	antisense;antisense	ENST00000522092.4;ENST00000578889.1	364162;218485	CGI:chr8:1101641-1101896	Island
cg10418578	0.397709	0.605263	-0.207554	6.55772e-12	7.86926e-11	chr7	1320600	1320601	.	.	.	.	CGI:chr7:1323175-1324007	N_Shelf
cg09142848	0.644498	0.85203	-0.207532	0.000152375	0.000157578	chr8	900121	900122	ERICH1-AS1;ERICH1-AS1;ERICH1-AS1;ERICH1-AS1	antisense;antisense;antisense;antisense	ENST00000522092.4;ENST00000524139.4;ENST00000577187.4;ENST00000578889.1	162469;16922;162378;16792	CGI:chr8:900103-900405	Island
cg06294416	0.436856	0.644385	-0.207529	1.33516e-08	3.94959e-08	chr12	66234452	66234453	IRAK3;IRAK3;RBMS1P1	protein_coding;protein_coding;processed_pseudogene	ENST00000261233.7;ENST00000457197.2;ENST00000417216.3	45572;45194;783	CGI:chr12:66235225-66235624	N_Shore
cg13525697	0.482698	0.690221	-0.207523	1.09962e-07	2.24153e-07	chr10	59561236	59561237	.	.	.	.	CGI:chr10:59708852-59710241	.
cg12417955	0.487678	0.695163	-0.207485	8.40066e-08	1.83602e-07	chr10	132774307	132774308	INPP5A;INPP5A;INPP5A;INPP5A	protein_coding;protein_coding;protein_coding;protein_coding	ENST00000342652.6;ENST00000368593.6;ENST00000368594.6;ENST00000445580.1	166380;236457;236486;8482	CGI:chr10:132772666-132772967	S_Shore
cg27468830	0.392255	0.599705	-0.20745	8.67338e-14	2.12164e-12	chr7	157434378	157434379	.	.	.	.	CGI:chr7:157441419-157442548	.
cg08944086	0.52124	0.728677	-0.207437	6.54878e-05	6.9533e-05	chr10	1183140	1183141	ADARB2;ADARB2;ADARB2;ADARB2	protein_coding;protein_coding;protein_coding;protein_coding	ENST00000381310.6;ENST00000381312.4;ENST00000474762.4;ENST00000490172.1	17221;554337;3427;5107	CGI:chr10:1184873-1185274	N_Shore
cg15381080	0.584248	0.791647	-0.207399	9.62179e-07	1.51098e-06	chr22	19725218	19725219	.	.	.	.	CGI:chr22:19725081-19725300	Island
cg16204066	0.517853	0.725235	-0.207382	3.83706e-09	1.36334e-08	chr6	33671145	33671146	ITPR3;ITPR3	protein_coding;protein_coding	ENST00000374316.8;ENST00000605930.2	50779;49765	CGI:chr6:33688189-33688461	.
cg13474004	0.56232	0.76961	-0.20729	3.73296e-05	4.09338e-05	chr8	1835814	1835815	ARHGEF10;ARHGEF10;ARHGEF10;ARHGEF10	protein_coding;protein_coding;protein_coding;protein_coding	ENST00000349830.6;ENST00000398564.4;ENST00000518288.4;ENST00000520359.4	11837;9702;11798;11825	CGI:chr8:1831454-1831655	.
cg19075377	0.618434	0.825691	-0.207257	5.01288e-05	5.40371e-05	chr13	112115855	112115856	.	.	.	.	CGI:chr13:112106551-112106799	.
cg15265085	0.404746	0.611715	-0.206969	2.54904e-06	3.53971e-06	chr6	32096811	32096812	TNXB;TNXB;TNXB;TNXB	protein_coding;protein_coding;protein_coding;protein_coding	ENST00000375244.6;ENST00000479795.1;ENST00000486148.1;ENST00000613214.3	12564;12503;12411;1388	CGI:chr6:32095756-32097267	Island
cg20901464	0.518324	0.725191	-0.206867	1.22219e-06	1.87304e-06	chr13	112108906	112108907	.	.	.	.	CGI:chr13:112106551-112106799	S_Shelf
cg15460899	0.611061	0.817868	-0.206807	1.73123e-05	2.0166e-05	chr1	205069955	205069956	CNTN2;CNTN2	protein_coding;protein_coding	ENST00000331830.4;ENST00000481872.5	26757;11349	CGI:chr1:205069656-205070025	Island
cg04904609	0.493616	0.700415	-0.206799	4.43142e-06	5.84727e-06	chr10	129892953	129892954	EBF3;EBF3	protein_coding;protein_coding	ENST00000355311.8;ENST00000368648.6	70889;70889	CGI:chr10:129896410-129896669	N_Shelf
cg06873343	0.509719	0.716499	-0.20678	4.49145e-07	7.74136e-07	chr7	2627974	2627975	.	.	.	.	CGI:chr7:2631522-2632303	N_Shelf
cg05718034	0.526015	0.73273	-0.206715	8.15046e-07	1.30244e-06	chr1	7062607	7062608	CAMTA1	protein_coding	ENST00000303635.10	277282	CGI:chr1:7062459-7062667	Island
cg26238975	0.462765	0.669456	-0.206691	2.31048e-06	3.25824e-06	chr14	101054325	101054326	AL132709.5;MIR134;MIR382;MIR485	miRNA;miRNA;miRNA;miRNA	ENST00000611970.1;ENST00000385258.3;ENST00000385009.2;ENST00000385292.3	-905;-363;62;-1083	CGI:chr14:101065306-101066047	.
cg08922032	0.531455	0.738138	-0.206683	2.58696e-10	1.55218e-09	chr15	24675326	24675327	NPAP1	protein_coding	ENST00000329468.3	-543	CGI:chr15:24675466-24676105	N_Shore
cg18443437	0.531444	0.738041	-0.206597	5.12576e-05	5.51605e-05	chr5	3326617	3326618	.	.	.	.	CGI:chr5:3326214-3326531	S_Shore
cg23270529	0.243849	0.45034	-0.206491	2.04485e-10	1.26265e-09	chr1	243421366	243421367	SDCCAG8;SDCCAG8;SDCCAG8	protein_coding;protein_coding;protein_coding	ENST00000366541.6;ENST00000435549.1;ENST00000463042.1	165309;134982;3348	CGI:chr1:243474337-243474840	.
cg15864104	0.725806	0.93228	-0.206474	1.63539e-07	3.14232e-07	chr18	57587276	57587277	FECH;FECH;FECH;FECH;FECH;FECH;FECH;FECH;FECH	protein_coding;protein_coding;protein_coding;protein_coding;protein_coding;protein_coding;protein_coding;protein_coding;protein_coding	ENST00000262093.8;ENST00000382873.6;ENST00000585494.4;ENST00000585699.1;ENST00000585747.1;ENST00000585878.1;ENST00000591215.4;ENST00000592111.1;ENST00000592699.4	-503;-621;-574;-576;-586;-621;-663;-654;-585	CGI:chr18:57586312-57586861	S_Shore
cg09291131	0.543783	0.750136	-0.206353	1.69359e-05	1.98001e-05	chr14	101055472	101055473	MIR323B;MIR382;MIR485	miRNA;miRNA;miRNA	ENST00000385269.2;ENST00000385009.2;ENST00000385292.3	-748;-1085;64	CGI:chr14:101065306-101066047	.
cg23476447	0.551937	0.758234	-0.206297	4.23455e-07	7.3584e-07	chr15	25240849	25240850	SNHG14;SNORD115-39	processed_transcript;snoRNA	ENST00000453082.4;ENST00000363694.1	22496;-898	CGI:chr15:25438248-25439268	.
cg11641791	0.335745	0.541908	-0.206163	0.000106804	0.000112091	chr17	40665177	40665178	AC073508.1;KRT222;KRT222;KRT222;KRT222;KRT222	miRNA;protein_coding;protein_coding;protein_coding;protein_coding;protein_coding	ENST00000607244.1;ENST00000394049.4;ENST00000394052.4;ENST00000476049.1;ENST00000580719.1;ENST00000581564.1	-448;-20;-35;-35;5;-31	CGI:chr17:40647692-40648451	.
cg00187933	0.535953	0.742109	-0.206156	1.26682e-08	3.80046e-08	chr4	1002997	1002998	IDUA;IDUA;IDUA;IDUA;IDUA	protein_coding;protein_coding;protein_coding;protein_coding;protein_coding	ENST00000247933.7;ENST00000502829.1;ENST00000514224.1;ENST00000514417.1;ENST00000514698.4	15999;255;3286;-433;15952	CGI:chr4:1001694-1003753	Island
cg15003570	0.598351	0.80441	-0.206059	4.23027e-05	4.59906e-05	chr10	131697603	131697604	.	.	.	.	CGI:chr10:131676018-131676255	.
cg18705098	0.637663	0.843692	-0.206029	2.75995e-05	3.09037e-05	chr10	132922744	132922745	CFAP46	protein_coding	ENST00000368586.8	19842	CGI:chr10:132922468-132922750	Island
cg03157182	0.469831	0.675851	-0.20602	2.61768e-08	6.96588e-08	chr12	132171252	132171253	.	.	.	.	CGI:chr12:132168478-132168691	S_Shelf
cg11349423	0.604135	0.8101	-0.205965	1.48623e-05	1.76023e-05	chr11	133362762	133362763	OPCML;OPCML;OPCML-IT1	protein_coding;protein_coding;sense_intronic	ENST00000524381.4;ENST00000529038.4;ENST00000533859.1	169758;169641;3319	CGI:chr11:133360989-133361750	S_Shore
cg07806886	0.145348	0.350938	-0.20559	1.23568e-10	8.45046e-10	chr3	120908052	120908053	STXBP5L;STXBP5L;STXBP5L;STXBP5L;STXBP5L;STXBP5L;STXBP5L	protein_coding;protein_coding;protein_coding;protein_coding;protein_coding;protein_coding;protein_coding	ENST00000273666.9;ENST00000461772.4;ENST00000471454.4;ENST00000472879.4;ENST00000492541.4;ENST00000495504.4;ENST00000497029.4	-21;-185;-154;-238;-263;-1051;-263	CGI:chr3:120908033-120908719	Island
cg24556660	0.534239	0.739815	-0.205576	1.85521e-08	5.17506e-08	chr7	107202187	107202188	COG5;HBP1;HBP1	protein_coding;protein_coding;protein_coding	ENST00000347053.6;ENST00000222574.7;ENST00000468410.4	361854;33171;33225	CGI:chr7:107169016-107169884	.
cg21879236	0.411215	0.616755	-0.20554	4.64868e-10	2.48098e-09	chr5	40227225	40227226	.	.	.	.	CGI:chr5:40679400-40681979	.
cg25020286	0.215325	0.420791	-0.205466	1.9987e-06	2.88248e-06	chr1	18630453	18630454	PAX7;PAX7;PAX7	protein_coding;protein_coding;protein_coding	ENST00000375375.6;ENST00000400661.3;ENST00000420770.5	-554;-1072;-1069	CGI:chr1:18630401-18633335	Island
cg25628701	0.514115	0.719551	-0.205436	1.59499e-06	2.3591e-06	chr5	179408942	179408943	.	.	.	.	CGI:chr5:179374297-179374815	.
cg18949521	0.511786	0.71719	-0.205404	1.66042e-07	3.1808e-07	chr6	29356523	29356524	OR5V1;OR5V1	protein_coding;protein_coding	ENST00000377154.1;ENST00000543825.1	75445;-245	CGI:chr6:29165687-29166196	.
cg13909949	0.545827	0.751226	-0.205399	1.87454e-06	2.71573e-06	chr20	60598548	60598549	.	.	.	.	CGI:chr20:60967452-60967683	.
cg10720997	0.145522	0.350862	-0.20534	1.46044e-07	2.86679e-07	chr1	1062478	1062479	RP11-465B22.3;RP11-465B22.3;RP11-465B22.3;RP11-465B22.3;RP11-54O7.18	transcribed_unprocessed_pseudogene;transcribed_unprocessed_pseudogene;transcribed_unprocessed_pseudogene;transcribed_unprocessed_pseudogene;lincRNA	ENST00000394517.5;ENST00000412397.2;ENST00000427998.4;ENST00000456409.4;ENST00000442292.2	1457;-602;2743;-602;811	CGI:chr1:1064298-1064531	N_Shore
cg20557710	0.610836	0.816176	-0.20534	2.52338e-05	2.86584e-05	chr12	2679616	2679617	CACNA1C;CACNA1C;CACNA1C;CACNA1C;CACNA1C;CACNA1C;CACNA1C;CACNA1C;CACNA1C;CACNA1C;CACNA1C;CACNA1C;CACNA1C;CACNA1C;CACNA1C;CACNA1C;CACNA1C;CACNA1C;CACNA1C;CACNA1C;CACNA1C;CACNA1C;CACNA1C;CACNA1C;CACNA1C;CACNA1C;CACNA1C;CACNA1C;CACNA1C-AS1	protein_coding;protein_coding;protein_coding;protein_coding;protein_coding;protein_coding;protein_coding;protein_coding;protein_coding;protein_coding;protein_coding;protein_coding;protein_coding;protein_coding;protein_coding;protein_coding;protein_coding;protein_coding;protein_coding;protein_coding;protein_coding;protein_coding;protein_coding;protein_coding;protein_coding;protein_coding;protein_c…	ENST00000327702.10;ENST00000335762.8;ENST00000344100.6;ENST00000347598.7;ENST00000399591.4;ENST00000399595.4;ENST00000399597.4;ENST00000399601.4;ENST00000399603.4;ENST00000399606.4;ENST00000399617.4;ENST00000399621.4;ENST00000399629.4;ENST00000399634.4;ENST00000399637.4;ENST00000399638.4;ENST00000399641.4;ENST00000399644.4;ENST00000399649.4;ENST00000399655.4;ENST00000402845.6;ENST00000406454.6;EN…	626052;626317;626052;626052;626052;626052;626052;626052;626052;626052;626052;626052;626052;626052;626052;626052;626052;626052;626052;626317;626052;626052;230639;230639;230639;38148;230639;230639;11503	CGI:chr12:2679448-2679713	Island
cg10786876	0.641717	0.847051	-0.205334	0.000220352	0.000223872	chr20	63490565	63490566	EEF1A2;EEF1A2	protein_coding;protein_coding	ENST00000217182.4;ENST00000298049.10	8751;7270	CGI:chr20:63490505-63490726	Island
cg03817911	0.0972515	0.302442	-0.20519	9.26263e-11	6.61914e-10	chr12	104303611	104303612	EID3;TXNRD1;TXNRD1;TXNRD1;TXNRD1;TXNRD1;TXNRD1;TXNRD1;TXNRD1;TXNRD1;TXNRD1;TXNRD1;TXNRD1;TXNRD1;TXNRD1;TXNRD1;TXNRD1;TXNRD1;TXNRD1;TXNRD1	protein_coding;protein_coding;protein_coding;protein_coding;protein_coding;protein_coding;protein_coding;protein_coding;protein_coding;protein_coding;protein_coding;protein_coding;protein_coding;protein_coding;protein_coding;protein_coding;protein_coding;protein_coding;protein_coding;protein_coding	ENST00000527879.1;ENST00000354940.9;ENST00000388854.6;ENST00000397736.5;ENST00000429002.5;ENST00000503506.5;ENST00000524698.4;ENST00000525566.4;ENST00000526266.4;ENST00000526390.4;ENST00000526580.4;ENST00000526691.4;ENST00000527335.4;ENST00000527688.4;ENST00000528079.5;ENST00000529546.4;ENST00000529751.1;ENST00000529784.4;ENST00000531689.4;ENST00000531691.4	-129;16928;16928;16928;87831;16928;16242;87831;17608;16620;16553;16729;14715;14892;16561;16588;16586;16288;16615;16685	CGI:chr12:104303570-104304206	Island
cg13215579	0.565249	0.770416	-0.205167	8.78965e-08	1.89499e-07	chr14	25431339	25431340	RP11-388G3.1	processed_pseudogene	ENST00000547237.1	896	CGI:chr14:25049218-25050406	.
cg24453580	0.136248	0.341413	-0.205165	3.77598e-08	9.45482e-08	chr12	49297281	49297282	PRPH;PRPH;PRPH;PRPH;RP11-161H23.9	protein_coding;protein_coding;protein_coding;protein_coding;antisense	ENST00000257860.7;ENST00000530631.1;ENST00000532332.2;ENST00000533401.1;ENST00000553259.1	3578;159;278;1529;27296	CGI:chr12:49295090-49297577	Island
cg14947634	0.661303	0.866458	-0.205155	1.16263e-05	1.39516e-05	chr10	99782830	99782831	ABCC2;ABCC2	protein_coding;protein_coding	ENST00000370434.1;ENST00000370449.7	66;97	CGI:chr10:99731923-99732597	.
cg17562226	0.419089	0.624195	-0.205106	8.19607e-10	3.8563e-09	chr6	29426877	29426878	OR11A1;OR11A1;OR11A1;OR5V1	protein_coding;protein_coding;protein_coding;protein_coding	ENST00000377147.2;ENST00000377148.4;ENST00000377149.4;ENST00000377154.1	856;1590;30195;5091	CGI:chr6:29553333-29554056	.
cg22514112	0.555448	0.760535	-0.205087	5.57261e-05	5.94661e-05	chr5	1859650	1859651	CTD-2194D22.5	TEC	ENST00000623526.1	241	CGI:chr5:1856659-1858330	S_Shore
cg13649658	0.505295	0.710342	-0.205047	7.9579e-09	2.55617e-08	chr9	137785941	137785942	EHMT1;EHMT1;EHMT1;RP11-188C12.2;RP11-188C12.2	protein_coding;protein_coding;protein_coding;transcribed_processed_pseudogene;transcribed_processed_pseudogene	ENST00000371394.5;ENST00000460843.4;ENST00000462942.2;ENST00000626603.1;ENST00000629344.1	166947;166977;41876;3295;2253	CGI:chr9:137788668-137789322	N_Shelf
cg27475805	0.486311	0.691259	-0.204948	1.25978e-08	3.79725e-08	chr6	29174152	29174153	OR2J2	protein_coding	ENST00000377167.3	848	CGI:chr6:29165687-29166196	.
cg04986504	0.36345	0.568258	-0.204808	6.53306e-08	1.47866e-07	chr11	12009719	12009720	DKK3;DKK3;DKK3;DKK3;DKK3;DKK3;DKK3;DKK3;DKK3;DKK3;DKK3;DKK3	protein_coding;protein_coding;protein_coding;protein_coding;protein_coding;protein_coding;protein_coding;protein_coding;protein_coding;protein_coding;protein_coding;protein_coding	ENST00000326932.7;ENST00000396505.5;ENST00000525493.4;ENST00000526218.4;ENST00000527132.1;ENST00000529338.1;ENST00000530694.4;ENST00000532873.4;ENST00000533813.4;ENST00000533900.1;ENST00000534479.4;ENST00000534511.4	-348;-636;51;7;-1088;-581;19;-821;-507;-506;-388;-1094	CGI:chr11:12008190-12009294	S_Shore
cg16689761	0.403948	0.608651	-0.204703	2.54434e-05	2.88449e-05	chr7	141660423	141660424	KIAA1147	protein_coding	ENST00000536163.4	41731	CGI:chr7:141701632-141702407	.
cg02159489	0.543553	0.748173	-0.20462	0.000435333	0.000438088	chr17	81492537	81492538	.	.	.	.	CGI:chr17:81487708-81488797	S_Shelf
cg09636302	0.510944	0.715548	-0.204604	3.00756e-06	4.11357e-06	chr12	95995705	95995706	HAL;HAL;HAL;HAL;HAL;HAL;HAL;RP11-256L6.3	protein_coding;protein_coding;protein_coding;protein_coding;protein_coding;protein_coding;protein_coding;antisense	ENST00000261208.6;ENST00000538703.4;ENST00000541929.4;ENST00000544080.5;ENST00000546579.1;ENST00000546999.4;ENST00000552509.4;ENST00000551849.1	661;640;661;587;-504;521;224;-817	CGI:chr12:95995627-95995897	Island
cg19756358	0.329495	0.534011	-0.204516	1.54714e-08	4.39277e-08	chr5	1479854	1479855	LPCAT1;LPCAT1;LPCAT1	protein_coding;protein_coding;protein_coding	ENST00000283415.3;ENST00000475622.4;ENST00000513757.4	44124;44109;14925	CGI:chr5:1483648-1483954	N_Shelf
cg13172906	0.445378	0.649805	-0.204427	3.40004e-08	8.61524e-08	chr8	142612934	142612935	ARC;ARC	protein_coding;protein_coding	ENST00000356613.3;ENST00000581404.1	1539;-231	CGI:chr8:142613069-142614805	N_Shore
cg27207493	0.604953	0.809371	-0.204418	3.45783e-07	6.17747e-07	chr17	4951854	4951855	ENO3;ENO3;ENO3;ENO3;ENO3;ENO3;ENO3;ENO3;ENO3;ENO3;ENO3;ENO3;ENO3;ENO3;ENO3	protein_coding;protein_coding;protein_coding;protein_coding;protein_coding;protein_coding;protein_coding;protein_coding;protein_coding;protein_coding;protein_coding;protein_coding;protein_coding;protein_coding;protein_coding	ENST00000323997.9;ENST00000518175.1;ENST00000518972.4;ENST00000519266.4;ENST00000519300.1;ENST00000519584.4;ENST00000519602.4;ENST00000519834.4;ENST00000520221.4;ENST00000521659.4;ENST00000521811.4;ENST00000522249.4;ENST00000522301.4;ENST00000522798.4;ENST00000571235.4	758;95;734;3761;712;734;764;734;3601;734;773;734;1663;2676;734	CGI:chr17:4947647-4950612	S_Shore
cg02926266	0.350362	0.554775	-0.204413	3.94866e-14	1.32176e-12	chr2	204982577	204982578	PARD3B;PARD3B;PARD3B;PARD3B;PARD3B;PARD3B;PARD3B;PARD3B;PARD3B	protein_coding;protein_coding;protein_coding;protein_coding;protein_coding;protein_coding;protein_coding;protein_coding;protein_coding	ENST00000349953.6;ENST00000351153.4;ENST00000358768.5;ENST00000406610.5;ENST00000415947.1;ENST00000462231.4;ENST00000613457.3;ENST00000614500.2;ENST00000622699.2	436576;436576;436576;436783;436783;436736;17424;17424;17424	CGI:chr2:204545216-204546187	.
cg17336615	0.51819	0.722518	-0.204328	6.57834e-07	1.08671e-06	chr6	401429	401430	IRF4;IRF4	protein_coding;protein_coding	ENST00000380956.7;ENST00000493114.1	9689;9660	CGI:chr6:391188-393802	.
cg21167716	0.679951	0.884276	-0.204325	3.32724e-05	3.67383e-05	chr12	132320157	132320158	GALNT9;GALNT9	protein_coding;protein_coding	ENST00000328957.11;ENST00000424720.5	9047;9193	CGI:chr12:132319713-132319983	S_Shore
cg16035036	0.656749	0.861044	-0.204295	7.76409e-05	8.18899e-05	chr5	1363784	1363785	LINC01511;LINC01511	lincRNA;lincRNA	ENST00000504989.1;ENST00000523692.1	16284;16265	CGI:chr5:1344430-1345354	.
cg06502570	0.564002	0.768222	-0.20422	0.000135966	0.000141298	chr20	61257868	61257869	CDH4	protein_coding	ENST00000614565.3	5441	CGI:chr20:61251921-61253922	S_Shelf
cg25238274	0.591594	0.795795	-0.204201	5.34201e-07	8.96443e-07	chr10	126225529	126225530	ADAM12;ADAM12;ADAM12	protein_coding;protein_coding;protein_coding	ENST00000368676.7;ENST00000368679.7;ENST00000448723.1	162927;162927;162927	CGI:chr10:126387586-126388913	.
cg07762474	0.476299	0.680419	-0.20412	1.15286e-10	8.05735e-10	chr16	30821064	30821065	RP11-2C24.7	lincRNA	ENST00000621583.1	-275	CGI:chr16:30820965-30821239	Island
cg01140660	0.603428	0.80741	-0.203982	4.10671e-06	5.45275e-06	chr11	133363305	133363306	OPCML;OPCML;OPCML-IT1	protein_coding;protein_coding;sense_intronic	ENST00000524381.4;ENST00000529038.4;ENST00000533859.1	169215;169098;2776	CGI:chr11:133360989-133361750	S_Shore
cg04648402	0.508905	0.712848	-0.203943	3.75918e-09	1.35593e-08	chr4	993773	993774	IDUA;IDUA;IDUA;IDUA;IDUA;IDUA;IDUA;IDUA;SLC26A1;SLC26A1;SLC26A1;SLC26A1	protein_coding;protein_coding;protein_coding;protein_coding;protein_coding;protein_coding;protein_coding;protein_coding;protein_coding;protein_coding;protein_coding;protein_coding	ENST00000247933.7;ENST00000502910.4;ENST00000504568.4;ENST00000506561.4;ENST00000508168.4;ENST00000509948.4;ENST00000514192.4;ENST00000514698.4;ENST00000361661.5;ENST00000398516.2;ENST00000398520.5;ENST00000622731.3	6775;6728;6685;6696;6706;1900;1947;6728;-336;-332;-396;-332	CGI:chr4:991138-991907	S_Shore
cg26819590	0.553919	0.757852	-0.203933	1.28083e-05	1.52834e-05	chr16	2055206	2055207	TSC2;TSC2;TSC2;TSC2;TSC2;TSC2;TSC2;TSC2;TSC2;TSC2	protein_coding;protein_coding;protein_coding;protein_coding;protein_coding;protein_coding;protein_coding;protein_coding;protein_coding;protein_coding	ENST00000219476.6;ENST00000350773.7;ENST00000382538.9;ENST00000401874.5;ENST00000432909.2;ENST00000439117.5;ENST00000439673.5;ENST00000467949.1;ENST00000568454.4;ENST00000568692.1	7740;7185;7225;7216;1772;7172;7191;-956;7003;909	CGI:chr16:2055013-2055389	Island
cg26589930	0.568876	0.772682	-0.203806	4.24697e-08	1.01927e-07	chr10	132917067	132917068	CFAP46;CFAP46	protein_coding;protein_coding	ENST00000368586.8;ENST00000486104.4	25519;-384	CGI:chr10:132916294-132916518	S_Shore
cg10969997	0.609047	0.812852	-0.203805	0.000111424	0.000116747	chr14	104375703	104375704	.	.	.	.	CGI:chr14:104334107-104334640	.
cg16313382	0.689705	0.893442	-0.203737	0.000219487	0.00022335	chr18	79513814	79513815	NFATC1;NFATC1;NFATC1;NFATC1;NFATC1;NFATC1;NFATC1;NFATC1;NFATC1;NFATC1	protein_coding;protein_coding;protein_coding;protein_coding;protein_coding;protein_coding;protein_coding;protein_coding;protein_coding;protein_coding	ENST00000253506.8;ENST00000318065.8;ENST00000329101.7;ENST00000397790.5;ENST00000427363.5;ENST00000542384.4;ENST00000545796.4;ENST00000586434.1;ENST00000590313.4;ENST00000590861.1	117957;113491;113477;117869;117588;117588;113539;113421;113482;20417	CGI:chr18:79512584-79513603	S_Shore
cg23900936	0.615596	0.819293	-0.203697	2.79172e-07	5.04413e-07	chr11	58229227	58229228	OR10Q1	protein_coding	ENST00000316770.2	-308	CGI:chr11:58578200-58579848	.
cg23541676	0.562044	0.765712	-0.203668	1.27526e-06	1.94106e-06	chr13	112434572	112434573	SPACA7;SPACA7	protein_coding;protein_coding	ENST00000283550.6;ENST00000375699.3	58252;52293	CGI:chr13:112452023-112452230	.
cg06919865	0.511971	0.715587	-0.203616	1.77988e-10	1.10981e-09	chr10	132919387	132919388	CFAP46	protein_coding	ENST00000368586.8	23199	CGI:chr10:132919097-132920273	Island
cg03554573	0.44327	0.646856	-0.203586	5.26235e-05	5.64394e-05	chr11	111284296	111284297	C11orf53	protein_coding	ENST00000280325.4	28313	CGI:chr11:111298579-111299703	.
cg21590968	0.524251	0.727606	-0.203355	2.60074e-06	3.60364e-06	chr2	239477428	239477429	.	.	.	.	CGI:chr2:239527380-239528070	.
cg10888281	0.553893	0.757244	-0.203351	2.7321e-05	3.06983e-05	chr2	65075423	65075424	CEP68;CEP68;RAB1A	protein_coding;protein_coding;protein_coding	ENST00000260569.4;ENST00000377990.5;ENST00000494188.1	18957;19050;54664	CGI:chr2:65055896-65057035	.
cg05308656	0.291916	0.495068	-0.203152	8.15166e-11	5.89143e-10	chr2	234497647	234497648	ARL4C;ARL4C	protein_coding;protein_coding	ENST00000339728.5;ENST00000390645.2	-1046;-593	CGI:chr2:234495858-234497897	Island
cg21966656	0.625491	0.828642	-0.203151	2.72767e-05	3.06983e-05	chr8	11039895	11039896	XKR6	protein_coding	ENST00000416569.2	161472	CGI:chr8:11059152-11059807	.
cg14210632	0.496959	0.700081	-0.203122	3.50336e-07	6.24128e-07	chr14	92688685	92688686	RIN3;RIN3;RIN3	protein_coding;protein_coding;protein_coding	ENST00000216487.10;ENST00000418924.5;ENST00000620541.3	174910;112450;174891	CGI:chr14:92686933-92688414	S_Shore
cg23776522	0.676334	0.879349	-0.203015	3.26085e-05	3.61937e-05	chr6	32042556	32042557	TNXB;TNXB;TNXB;TNXB;TNXB	protein_coding;protein_coding;protein_coding;protein_coding;protein_coding	ENST00000375244.6;ENST00000451343.4;ENST00000490077.4;ENST00000498094.1;ENST00000611016.1	66819;3573;4052;897;19929	CGI:chr6:32079038-32079317	.
cg05663064	0.523908	0.726836	-0.202928	1.85993e-09	7.63171e-09	chr21	45984302	45984303	COL6A1;COL6A1	protein_coding;protein_coding	ENST00000361866.6;ENST00000612273.1	2564;2532	CGI:chr21:45984194-45984398	Island
cg04893513	0.674741	0.877627	-0.202886	2.98003e-07	5.35395e-07	chr16	852736	852737	.	.	.	.	CGI:chr16:854416-854669	N_Shore
cg00661947	0.663839	0.866723	-0.202884	2.36377e-05	2.70875e-05	chr12	65546213	65546214	RP11-230G5.2;RP11-230G5.2;RP11-230G5.2;RP11-230G5.2;RP11-230G5.2	lincRNA;lincRNA;lincRNA;lincRNA;lincRNA	ENST00000511935.2;ENST00000535315.4;ENST00000537250.4;ENST00000539653.4;ENST00000540652.4	11099;95945;95986;96150;12477	CGI:chr12:65729008-65729548	.
cg25504273	0.673547	0.87639	-0.202843	0.000157194	0.000162298	chr19	3820262	3820263	ZFR2	protein_coding	ENST00000262961.7	48767	CGI:chr19:3820101-3820306	Island
cg02269797	0.604876	0.807625	-0.202749	5.94095e-09	1.95774e-08	chr11	11937756	11937757	USP47;USP47;USP47;USP47	protein_coding;protein_coding;protein_coding;protein_coding	ENST00000339865.8;ENST00000399455.2;ENST00000525078.1;ENST00000527733.4	96332;95689;-575;95780	CGI:chr11:12008190-12009294	.
cg14055970	0.562034	0.764553	-0.202519	8.1968e-06	1.01423e-05	chr9	127825436	127825437	ENG;ENG;ENG;ENG	protein_coding;protein_coding;protein_coding;protein_coding	ENST00000344849.4;ENST00000373203.7;ENST00000480266.4;ENST00000486329.1	29201;29321;21732;-1030	CGI:chr9:127825253-127825810	Island
cg06394109	0.279656	0.482143	-0.202487	2.23115e-08	6.03835e-08	chr16	1102511	1102512	.	.	.	.	CGI:chr16:1102947-1103355	N_Shore
cg11554566	0.364048	0.566533	-0.202485	1.64937e-06	2.42263e-06	chr21	45978682	45978683	.	.	.	.	CGI:chr21:45981194-45981522	N_Shelf
cg11784799	0.600274	0.802752	-0.202478	2.69911e-05	3.04908e-05	chr8	142180730	142180731	.	.	.	.	CGI:chr8:142121293-142121507	.
cg25973534	0.169992	0.372462	-0.20247	1.04478e-06	1.62068e-06	chr5	5139740	5139741	ADAMTS16;ADAMTS16;ADAMTS16;CTD-2297D10.2	protein_coding;protein_coding;protein_coding;antisense	ENST00000274181.7;ENST00000433402.2;ENST00000511368.4;ENST00000512155.1	-591;-729;-591;315	CGI:chr5:5139328-5140828	Island
cg11414017	0.713969	0.916403	-0.202434	4.73455e-05	5.12104e-05	chr7	1411569	1411570	.	.	.	.	CGI:chr7:1411484-1411766	Island
cg05848579	0.530641	0.733005	-0.202364	1.59342e-05	1.87323e-05	chr16	1258102	1258103	TPSD1;TPSD1	protein_coding;protein_coding	ENST00000211076.4;ENST00000397534.5	1968;2042	CGI:chr16:1258003-1258307	Island
cg18147606	0.637045	0.839395	-0.20235	0.000174577	0.000179372	chr8	21444722	21444723	.	.	.	.	CGI:chr8:21750566-21750823	.
cg11180966	0.629775	0.832064	-0.202289	2.93217e-06	4.0191e-06	chr11	755608	755609	TALDO1;TALDO1;TALDO1;TALDO1;TALDO1;TALDO1;TALDO1	protein_coding;protein_coding;protein_coding;protein_coding;protein_coding;protein_coding;protein_coding	ENST00000319006.6;ENST00000528070.4;ENST00000528097.4;ENST00000530119.4;ENST00000530440.1;ENST00000532685.1;ENST00000533796.1	8278;8192;8179;8143;8153;8190;-137	CGI:chr11:746877-748032	.
cg02390561	0.664245	0.866334	-0.202089	1.02101e-05	1.24099e-05	chr12	132269698	132269699	GALNT9;GALNT9;GALNT9	protein_coding;protein_coding;protein_coding	ENST00000328957.11;ENST00000424720.5;ENST00000535208.1	59506;59652;5521	CGI:chr12:132269172-132269770	Island
cg00012522	0.66322	0.865245	-0.202025	7.21835e-05	7.62603e-05	chr15	97960722	97960723	ARRDC4	protein_coding	ENST00000268042.6	23	CGI:chr15:97960304-97961419	Island
cg13844922	0.48113	0.683147	-0.202017	1.81991e-09	7.56512e-09	chr14	64942941	64942942	CHURC1;CHURC1;CHURC1-FNTB;CHURC1-FNTB;CHURC1-FNTB;CHURC1-FNTB;GPX2;GPX2;GPX2;GPX2;GPX2	protein_coding;protein_coding;protein_coding;protein_coding;protein_coding;protein_coding;protein_coding;protein_coding;protein_coding;protein_coding;protein_coding	ENST00000551093.4;ENST00000551947.4;ENST00000549987.1;ENST00000551823.1;ENST00000552941.4;ENST00000553743.4;ENST00000389614.5;ENST00000553522.1;ENST00000557049.1;ENST00000557323.1;ENST00000612794.1	28463;28497;28447;18904;28455;18904;-127;-195;-220;-194;-35	CGI:chr14:64914357-64914664	.
cg21127079	0.648718	0.850674	-0.201956	0.000178641	0.000183251	chr11	111284101	111284102	C11orf53	protein_coding	ENST00000280325.4	28118	CGI:chr11:111298579-111299703	.
cg12694372	0.420192	0.622061	-0.201869	7.55348e-06	9.41963e-06	chr6	32096805	32096806	TNXB;TNXB;TNXB;TNXB	protein_coding;protein_coding;protein_coding;protein_coding	ENST00000375244.6;ENST00000479795.1;ENST00000486148.1;ENST00000613214.3	12570;12509;12417;1394	CGI:chr6:32095756-32097267	Island
cg00830435	0.529328	0.731194	-0.201866	3.84038e-11	3.25664e-10	chr1	3001962	3001963	.	.	.	.	CGI:chr1:3001801-3002189	Island
cg15595525	0.393881	0.595718	-0.201837	3.22764e-09	1.19932e-08	chr10	133130942	133130943	GPR123;GPR123;GPR123	protein_coding;protein_coding;protein_coding	ENST00000392606.2;ENST00000392607.6;ENST00000607359.4	28695;43036;60012	CGI:chr10:133131007-133131288	N_Shore
cg07522403	0.567569	0.769402	-0.201833	4.59232e-09	1.57877e-08	chr7	66640997	66640998	KCTD7;KCTD7	protein_coding;protein_coding	ENST00000275532.6;ENST00000503687.1	12115;12038	CGI:chr7:66628361-66629332	.
cg05167429	0.519665	0.721431	-0.201766	6.63973e-07	1.09118e-06	chr16	34051619	34051620	.	.	.	.	CGI:chr16:34050115-34051243	S_Shore
cg23983106	0.501569	0.703157	-0.201588	8.60912e-08	1.86874e-07	chr17	82311257	82311258	.	.	.	.	CGI:chr17:82318331-82319957	.
cg07584765	0.549337	0.750897	-0.20156	5.07317e-10	2.66656e-09	chr2	158619416	158619417	PKP4;PKP4;PKP4;PKP4;PKP4;PKP4;PKP4;PKP4;PKP4	protein_coding;protein_coding;protein_coding;protein_coding;protein_coding;protein_coding;protein_coding;protein_coding;protein_coding	ENST00000389757.6;ENST00000389759.6;ENST00000421462.4;ENST00000426248.6;ENST00000452162.4;ENST00000457109.4;ENST00000462335.1;ENST00000481115.2;ENST00000628904.1	162316;162303;161960;162451;162282;162301;161222;42074;162318	CGI:chr2:158456660-158458301	.
cg06380820	0.466388	0.667883	-0.201495	3.87567e-13	7.46947e-12	chr10	132885261	132885262	CFAP46	protein_coding	ENST00000368586.8	57325	CGI:chr10:132885149-132885464	Island
cg19904905	0.362048	0.563484	-0.201436	5.72796e-12	7.1431e-11	chr19	48966410	48966411	FTL;FTL	protein_coding;protein_coding	ENST00000331825.9;ENST00000622577.2	1108;1100	CGI:chr19:48965115-48966119	S_Shore
cg15754594	0.44678	0.648039	-0.201259	1.16048e-05	1.39516e-05	chr2	105568231	105568232	.	.	.	.	CGI:chr2:105398421-105399427	.
cg06264868	0.584617	0.785873	-0.201256	3.65083e-07	6.46777e-07	chr10	732769	732770	.	.	.	.	CGI:chr10:726353-726774	.
cg23888021	0.475373	0.676597	-0.201224	1.56161e-08	4.41415e-08	chr12	132331832	132331833	RP13-895J2.8	TEC	ENST00000623871.1	-174	CGI:chr12:132328863-132329990	S_Shore
cg05673968	0.522914	0.724138	-0.201224	1.80601e-05	2.09221e-05	chr12	125240944	125240945	TMEM132B	protein_coding	ENST00000418253.2	54107	CGI:chr12:125185571-125187566	.
cg10268509	0.497276	0.698498	-0.201222	2.54244e-08	6.82275e-08	chr16	89053892	89053893	CTD-2555A7.2	lincRNA	ENST00000537498.1	-926	CGI:chr16:89052898-89053256	S_Shore
cg07506599	0.709484	0.910698	-0.201214	0.00215508	0.00215508	chr7	157656525	157656526	PTPRN2;PTPRN2;PTPRN2;PTPRN2	protein_coding;protein_coding;protein_coding;protein_coding	ENST00000389413.6;ENST00000389416.7;ENST00000389418.7;ENST00000409483.4	931249;931187;931155;931264	CGI:chr7:157655548-157655874	S_Shore
cg05904338	0.460964	0.662177	-0.201213	9.28694e-08	1.96883e-07	chr2	23323347	23323348	.	.	.	.	CGI:chr2:23384858-23387253	.
cg09529821	0.684378	0.885551	-0.201173	1.28853e-06	1.95222e-06	chr11	1648351	1648352	.	.	.	.	CGI:chr11:1652604-1652994	.
cg09741519	0.533223	0.73432	-0.201097	5.12155e-07	8.68615e-07	chr17	1907481	1907482	.	.	.	.	CGI:chr17:1908179-1908803	N_Shore
cg05422049	0.309902	0.510896	-0.200994	2.13499e-06	3.03092e-06	chr2	1591962	1591963	AC144450.1	antisense	ENST00000438247.1	28152	CGI:chr2:1568179-1569351	.
cg13345683	0.582216	0.783116	-0.2009	3.87538e-07	6.80868e-07	chr7	154306220	154306221	DPP6;DPP6;DPP6;DPP6;DPP6;DPP6;DPP6;DPP6	protein_coding;protein_coding;protein_coding;protein_coding;protein_coding;protein_coding;protein_coding;protein_coding	ENST00000332007.6;ENST00000377770.6;ENST00000404039.4;ENST00000406326.4;ENST00000427557.1;ENST00000462622.4;ENST00000496611.1;ENST00000619756.3	1109;253539;419122;253801;777;1109;1007;957	CGI:chr7:154304879-154305196	S_Shore
cg20776829	0.176426	0.377279	-0.200853	1.90659e-05	2.20071e-05	chr4	89837646	89837647	SNCA;SNCA;SNCA;SNCA;SNCA;SNCA;SNCA;SNCA;SNCA;SNCA-AS1;SNCA-AS1	protein_coding;protein_coding;protein_coding;protein_coding;protein_coding;protein_coding;protein_coding;protein_coding;protein_coding;antisense;antisense	ENST00000336904.6;ENST00000394986.4;ENST00000394989.5;ENST00000394991.6;ENST00000420646.5;ENST00000506244.4;ENST00000506691.1;ENST00000508895.4;ENST00000618500.3;ENST00000501215.1;ENST00000513653.1	670;-506;-446;-417;-669;-477;-569;-1432;-1432;1221;1237	CGI:chr4:89836857-89837719	Island
cg06428425	0.603854	0.804704	-0.20085	5.92903e-08	1.38635e-07	*	-1	-1	.	.	.	.	.	.
cg09911881	0.577794	0.778606	-0.200812	9.84364e-07	1.54201e-06	chr6	32052600	32052601	TNXB;TNXB	protein_coding;protein_coding	ENST00000375244.6;ENST00000611016.1	56775;9885	CGI:chr6:32079038-32079317	.
cg20417128	0.565111	0.7659	-0.200789	5.34813e-09	1.81894e-08	chr2	1686853	1686854	PXDN;PXDN;PXDN;PXDN;PXDN	protein_coding;protein_coding;protein_coding;protein_coding;protein_coding	ENST00000252804.7;ENST00000425171.1;ENST00000433670.4;ENST00000447941.4;ENST00000485177.1	57654;57650;57590;5718;58000	CGI:chr2:1666219-1666431	.
cg10856724	0.66818	0.868917	-0.200737	0.00020686	0.000211177	chr12	34402277	34402278	.	.	.	.	CGI:chr12:34350419-34350679	.
cg18707501	0.486404	0.686964	-0.20056	3.37475e-06	4.54733e-06	chr15	26615630	26615631	GABRB3;GABRB3;GABRB3;GABRB3;GABRB3;GABRB3;GABRB3;GABRB3;GABRB3;GABRB3;GABRB3;GABRB3;GABRB3	protein_coding;protein_coding;protein_coding;protein_coding;protein_coding;protein_coding;protein_coding;protein_coding;protein_coding;protein_coding;protein_coding;protein_coding;protein_coding	ENST00000299267.7;ENST00000311550.8;ENST00000400188.6;ENST00000541819.5;ENST00000545868.4;ENST00000554556.4;ENST00000555094.4;ENST00000555632.4;ENST00000556166.2;ENST00000556636.4;ENST00000621499.1;ENST00000622697.3;ENST00000628124.1	158159;157445;13461;323910;151607;157428;101136;157385;13549;5777;88;157447;101136	CGI:chr15:26628950-26629381	.
cg23941787	0.67187	0.872384	-0.200514	1.17691e-07	2.36872e-07	chr19	38600061	38600062	CTB-186G2.1;MAP4K1;MAP4K1;MAP4K1;MAP4K1;MAP4K1;MAP4K1	antisense;protein_coding;protein_coding;protein_coding;protein_coding;protein_coding;protein_coding	ENST00000589557.1;ENST00000396857.5;ENST00000585583.4;ENST00000586296.4;ENST00000589130.4;ENST00000591517.4;ENST00000591921.1	3714;17943;13867;17906;18822;17864;9574	CGI:chr19:38596238-38596664	S_Shelf
cg17778888	0.62164	0.822103	-0.200463	3.85743e-05	4.22259e-05	chr5	510306	510307	SLC9A3;SLC9A3	protein_coding;protein_coding	ENST00000264938.6;ENST00000514375.1	14027;14025	CGI:chr5:507630-508720	S_Shore
cg03550620	0.652303	0.852762	-0.200459	1.12746e-06	1.73623e-06	chr5	65725100	65725101	NLN;NLN;NLN;NLN	protein_coding;protein_coding;protein_coding;protein_coding	ENST00000380985.8;ENST00000502464.4;ENST00000506539.4;ENST00000514991.4	2903;2856;2841;2852	CGI:chr5:65721776-65722685	S_Shelf
cg19741148	0.627363	0.827799	-0.200436	9.32604e-06	1.14284e-05	chr5	555780	555781	.	.	.	.	CGI:chr5:554708-555217	S_Shore
cg19129687	0.665731	0.86615	-0.200419	0.00125502	0.001257	chr13	113401808	113401809	RP11-102K13.5	lincRNA	ENST00000612156.1	3765	CGI:chr13:113401785-113402262	Island
cg13720705	0.391392	0.591794	-0.200402	1.44013e-08	4.20148e-08	chr10	37701442	37701443	.	.	.	.	CGI:chr10:37680208-37681422	.
cg27407385	0.593906	0.7943	-0.200394	1.5244e-08	4.38696e-08	chr16	810721	810722	PRR25	protein_coding	ENST00000301698.1	5277	CGI:chr16:813278-813917	N_Shelf
cg18125814	0.518579	0.718939	-0.20036	9.86889e-08	2.06468e-07	chr11	49433662	49433663	RP11-61N20.3	processed_pseudogene	ENST00000526165.1	777	CGI:chr11:49558380-49558727	.
cg20992181	0.401652	0.601882	-0.20023	2.0906e-06	2.98121e-06	chr11	69891517	69891518	.	.	.	.	CGI:chr11:69892010-69892249	N_Shore
cg13794641	0.561666	0.761862	-0.200196	4.20773e-08	1.01368e-07	*	-1	-1	.	.	.	.	.	.
cg19698168	0.331174	0.531328	-0.200154	1.14443e-13	2.69577e-12	chr1	248165640	248165641	.	.	.	.	CGI:chr1:247937023-247937424	.
cg16298867	0.530493	0.730646	-0.200153	1.25999e-06	1.92633e-06	chr1	2917078	2917079	.	.	.	.	CGI:chr1:2911220-2911729	.
cg03627350	0.579771	0.779921	-0.20015	2.91692e-08	7.66596e-08	chr10	132880921	132880922	CFAP46	protein_coding	ENST00000368586.8	61665	CGI:chr10:132879347-132879748	S_Shore
cg26017136	0.598905	0.798985	-0.20008	2.77407e-06	3.83545e-06	chr8	1188280	1188281	CTD-2281E23.2	processed_transcript	ENST00000520524.4	83397	CGI:chr8:1187207-1188672	Island
cg07464977	0.454416	0.654494	-0.200078	5.67685e-09	1.91031e-08	chr5	2097022	2097023	.	.	.	.	CGI:chr5:2111722-2112370	.
cg23817981	0.474263	0.273477	0.200786	6.54055e-11	4.89387e-10	chr3	32951571	32951572	CCR4	protein_coding	ENST00000330953.5	-4	CGI:chr3:32821682-32821923	.
cg20070026	0.276032	0.0744999	0.201532	0.000311843	0.000314314	chr14	101781736	101781737	PPP2R5C;PPP2R5C;PPP2R5C;PPP2R5C;PPP2R5C;PPP2R5C;PPP2R5C	protein_coding;protein_coding;protein_coding;protein_coding;protein_coding;protein_coding;protein_coding	ENST00000328724.8;ENST00000422945.5;ENST00000553890.1;ENST00000554442.4;ENST00000554504.1;ENST00000556068.4;ENST00000557268.4	19850;19937;18807;19873;18830;19873;19835	CGI:chr14:101781323-101781942	Island
cg13100449	0.488289	0.286696	0.201593	0.000112993	0.000118197	chr1	184867071	184867072	FAM129A;FAM129A;FAM129A	protein_coding;protein_coding;protein_coding	ENST00000367511.3;ENST00000461167.1;ENST00000487074.4	107480;1488;971	CGI:chr1:184973730-184974645	.
cg05888917	0.293647	0.0917592	0.201888	3.27948e-05	3.63371e-05	chr1	156656957	156656958	BCAN;BCAN;RP11-284F21.7	protein_coding;protein_coding;antisense	ENST00000329117.8;ENST00000496038.1;ENST00000448869.1	15008;227;4468	CGI:chr1:156657550-156657784	N_Shore
cg02534363	0.595574	0.393378	0.202196	1.28029e-07	2.55255e-07	chr3	47009460	47009461	NBEAL2;NBEAL2;NBEAL2	protein_coding;protein_coding;protein_coding	ENST00000416683.4;ENST00000443829.4;ENST00000450053.6	14138;7426;29776	CGI:chr3:47008996-47010119	Island
cg25553466	0.673049	0.468728	0.204321	1.49652e-05	1.76584e-05	chr10	132132431	132132432	JAKMIP3	protein_coding	ENST00000298622.7	27759	CGI:chr10:132134821-132135173	N_Shelf
cg13058457	0.560207	0.35531	0.204897	7.42128e-07	1.19759e-06	chr15	38129959	38129960	.	.	.	.	CGI:chr15:38072794-38073127	.
cg06903569	0.463345	0.256161	0.207184	8.1051e-05	8.5204e-05	chr6	28336331	28336332	ZSCAN31;ZSCAN31;ZSCAN31;ZSCAN31;ZSCAN31;ZSCAN31;ZSCAN31;ZSCAN31;ZSCAN31;ZSCAN31;ZSCAN31;ZSCAN31;ZSCAN31;ZSCAN31;ZSCAN31;ZSCAN31;ZSCAN31	protein_coding;protein_coding;protein_coding;protein_coding;protein_coding;protein_coding;protein_coding;protein_coding;protein_coding;protein_coding;protein_coding;protein_coding;protein_coding;protein_coding;protein_coding;protein_coding;protein_coding	ENST00000344279.9;ENST00000396838.5;ENST00000414429.4;ENST00000414431.1;ENST00000426434.1;ENST00000426756.4;ENST00000434036.4;ENST00000435857.4;ENST00000439158.4;ENST00000439628.4;ENST00000439636.4;ENST00000444081.4;ENST00000446222.4;ENST00000446474.4;ENST00000447021.1;ENST00000453745.4;ENST00000611469.3	-165;17865;19941;-196;17874;5421;17874;45;-196;17874;-879;17735;17856;-196;-394;-132;45	CGI:chr6:28383345-28383664	.
cg06733155	0.397676	0.190455	0.207221	2.89874e-07	5.22266e-07	chr7	74094538	74094539	LIMK1;LIMK1;LIMK1;LIMK1;LIMK1;LIMK1	protein_coding;protein_coding;protein_coding;protein_coding;protein_coding;protein_coding	ENST00000336180.5;ENST00000418310.4;ENST00000435201.4;ENST00000486361.4;ENST00000491052.4;ENST00000538333.3	10597;11604;10546;581;304;1458	CGI:chr7:74083514-74084367	.
cg18602913	0.536409	0.328577	0.207832	4.57467e-10	2.46567e-09	chr19	15912124	15912125	AC005336.4	processed_pseudogene	ENST00000585431.2	-299	CGI:chr19:15911702-15912040	S_Shore
cg08271229	0.497838	0.28895	0.208888	3.01001e-08	7.84576e-08	chr1	2291235	2291236	SKI;SKI;SKI	protein_coding;protein_coding;protein_coding	ENST00000378536.4;ENST00000478223.2;ENST00000508416.1	62539;43238;58755	CGI:chr1:2290759-2291130	S_Shore
cg14019323	0.383451	0.173797	0.209654	0.00016222	0.000166945	chr12	64824633	64824634	TBC1D30;TBC1D30;TBC1D30;TBC1D30;TBC1D30	protein_coding;protein_coding;protein_coding;protein_coding;protein_coding	ENST00000539120.1;ENST00000539867.4;ENST00000542120.4;ENST00000544190.4;ENST00000544457.1	-38;60;38621;43438;-35	CGI:chr12:64824465-64825363	Island
cg00287737	0.551417	0.34006	0.211357	1.51982e-11	1.46455e-10	chr4	900282	900283	GAK;GAK;GAK;GAK;GAK;GAK;GAK;GAK	protein_coding;protein_coding;protein_coding;protein_coding;protein_coding;protein_coding;protein_coding;protein_coding	ENST00000314167.7;ENST00000502656.4;ENST00000505819.4;ENST00000507580.4;ENST00000507991.1;ENST00000511163.4;ENST00000512325.2;ENST00000618573.3	32017;32046;32084;32036;4500;32092;32036;31906	CGI:chr4:900123-900398	Island
cg22369786	0.619544	0.406567	0.212977	7.11208e-06	8.93929e-06	chr13	80337491	80337492	SPRY2;SPRY2;SPRY2	protein_coding;protein_coding;protein_coding	ENST00000377102.4;ENST00000377104.3;ENST00000540649.2	2169;3461;1347	CGI:chr13:80339022-80339326	N_Shore
cg16657538	0.519785	0.306717	0.213068	1.1484e-05	1.3833e-05	chr18	35267602	35267603	RP11-158H5.8;ZSCAN30;ZSCAN30;ZSCAN30;ZSCAN30;ZSCAN30;ZSCAN30;ZSCAN30	lincRNA;protein_coding;protein_coding;protein_coding;protein_coding;protein_coding;protein_coding;protein_coding	ENST00000618230.1;ENST00000333206.8;ENST00000420878.6;ENST00000589178.4;ENST00000592211.1;ENST00000592278.1;ENST00000592598.1;ENST00000610712.1	-617;22607;22631;22596;22628;22620;347;22644	CGI:chr18:35267320-35268166	Island
cg23013309	0.450065	0.234832	0.215233	0.000116025	0.000121169	chr12	64825061	64825062	TBC1D30;TBC1D30;TBC1D30;TBC1D30;TBC1D30	protein_coding;protein_coding;protein_coding;protein_coding;protein_coding	ENST00000539120.1;ENST00000539867.4;ENST00000542120.4;ENST00000544190.4;ENST00000544457.1	390;488;39049;43866;393	CGI:chr12:64824465-64825363	Island
cg15016701	0.478039	0.261646	0.216393	7.76378e-10	3.74073e-09	chr12	62817903	62817904	PPM1H;PPM1H;PPM1H	protein_coding;protein_coding;protein_coding	ENST00000228705.6;ENST00000547857.1;ENST00000548414.4	117135;22326;116146	CGI:chr12:62801877-62802129	.
cg13488570	0.305626	0.0874892	0.218137	0.00061829	0.00062024	chr1	2290814	2290815	SKI;SKI;SKI	protein_coding;protein_coding;protein_coding	ENST00000378536.4;ENST00000478223.2;ENST00000508416.1	62118;42817;58334	CGI:chr1:2290759-2291130	Island
cg04270489	0.566645	0.34622	0.220425	5.90565e-10	2.98571e-09	chr11	86116463	86116464	.	.	.	.	CGI:chr11:86068683-86069355	.
cg08343881	0.453972	0.232996	0.220976	7.90067e-05	8.31925e-05	chr6	28336298	28336299	ZSCAN31;ZSCAN31;ZSCAN31;ZSCAN31;ZSCAN31;ZSCAN31;ZSCAN31;ZSCAN31;ZSCAN31;ZSCAN31;ZSCAN31;ZSCAN31;ZSCAN31;ZSCAN31;ZSCAN31;ZSCAN31;ZSCAN31	protein_coding;protein_coding;protein_coding;protein_coding;protein_coding;protein_coding;protein_coding;protein_coding;protein_coding;protein_coding;protein_coding;protein_coding;protein_coding;protein_coding;protein_coding;protein_coding;protein_coding	ENST00000344279.9;ENST00000396838.5;ENST00000414429.4;ENST00000414431.1;ENST00000426434.1;ENST00000426756.4;ENST00000434036.4;ENST00000435857.4;ENST00000439158.4;ENST00000439628.4;ENST00000439636.4;ENST00000444081.4;ENST00000446222.4;ENST00000446474.4;ENST00000447021.1;ENST00000453745.4;ENST00000611469.3	-132;17898;19974;-163;17907;5454;17907;78;-163;17907;-846;17768;17889;-163;-361;-99;78	CGI:chr6:28383345-28383664	.
cg22167353	0.48262	0.259397	0.223223	8.11441e-08	1.78573e-07	chr16	83995852	83995853	NECAB2;NECAB2;NECAB2;NECAB2	protein_coding;protein_coding;protein_coding;protein_coding	ENST00000305202.7;ENST00000565691.4;ENST00000566836.1;ENST00000567703.1	27219;24400;17306;2448	CGI:chr16:83995851-83996105	Island
cg13030790	0.585476	0.362251	0.223225	7.91672e-10	3.78574e-09	chr21	35049206	35049207	RUNX1;RUNX1;RUNX1;RUNX1;RUNX1;RUNX1	protein_coding;protein_coding;protein_coding;protein_coding;protein_coding;protein_coding	ENST00000300305.6;ENST00000416754.1;ENST00000437180.4;ENST00000455571.4;ENST00000475045.5;ENST00000482318.4	139;65;93;93;955462;83	CGI:chr21:35026663-35026962	.
cg01519261	0.657	0.433186	0.223814	1.01073e-10	7.14249e-10	chr21	35049170	35049171	RUNX1;RUNX1;RUNX1;RUNX1;RUNX1;RUNX1	protein_coding;protein_coding;protein_coding;protein_coding;protein_coding;protein_coding	ENST00000300305.6;ENST00000416754.1;ENST00000437180.4;ENST00000455571.4;ENST00000475045.5;ENST00000482318.4	175;101;129;129;955498;119	CGI:chr21:35026663-35026962	.
cg20741105	0.688591	0.462825	0.225766	7.26133e-16	4.19837e-14	chr7	43647290	43647291	COA1;COA1;COA1;COA1;COA1;COA1;COA1;COA1;COA1;COA1;COA1;COA1;COA1;COA1;COA1	protein_coding;protein_coding;protein_coding;protein_coding;protein_coding;protein_coding;protein_coding;protein_coding;protein_coding;protein_coding;protein_coding;protein_coding;protein_coding;protein_coding;protein_coding	ENST00000223336.9;ENST00000310564.9;ENST00000395879.4;ENST00000415076.5;ENST00000415798.4;ENST00000418140.4;ENST00000431651.4;ENST00000438444.4;ENST00000446330.5;ENST00000446564.4;ENST00000448704.4;ENST00000451651.4;ENST00000459713.1;ENST00000470156.1;ENST00000490251.1	82252;82200;3007;82224;82234;82194;82216;82428;82224;82194;82212;82185;1465;82194;-864	CGI:chr7:43583091-43583793	.
cg05115106	0.85725	0.631351	0.225899	6.0487e-18	5.49568e-16	chr17	77254262	77254263	.	.	.	.	CGI:chr17:77255876-77256098	N_Shore
cg09568647	0.616927	0.388456	0.228471	7.81146e-11	5.71045e-10	chr5	54646408	54646409	.	.	.	.	CGI:chr5:54517549-54519476	.
cg07810039	0.594598	0.365468	0.22913	7.72167e-10	3.74073e-09	chr1	218351216	218351217	TGFB2;TGFB2;TGFB2	protein_coding;protein_coding;protein_coding	ENST00000366929.4;ENST00000366930.7;ENST00000488793.1	4980;4980;4177	CGI:chr1:218346945-218347164	.
cg03030717	0.527099	0.296513	0.230586	0.000157976	0.000162841	chr12	64824289	64824290	TBC1D30;TBC1D30;TBC1D30;TBC1D30;TBC1D30	protein_coding;protein_coding;protein_coding;protein_coding;protein_coding	ENST00000539120.1;ENST00000539867.4;ENST00000542120.4;ENST00000544190.4;ENST00000544457.1	-382;-284;38277;43094;-379	CGI:chr12:64824465-64825363	N_Shore
cg00334820	0.456401	0.225642	0.230759	3.11251e-09	1.17029e-08	chr16	20806347	20806348	AC004381.6;AC004381.6;AC004381.6;AC004381.6;AC004381.6;AC004381.6;AC004381.6;AC004381.6;AC004381.6;AC004381.6;AC004381.6;AC004381.6;AC004381.6;AC004381.6;AC004381.6;ERI2;ERI2;ERI2;ERI2;ERI2;ERI2;ERI2;ERI2;ERI2;ERI2;ERI2;ERI2;ERI2	protein_coding;protein_coding;protein_coding;protein_coding;protein_coding;protein_coding;protein_coding;protein_coding;protein_coding;protein_coding;protein_coding;protein_coding;protein_coding;protein_coding;protein_coding;protein_coding;protein_coding;protein_coding;protein_coding;protein_coding;protein_coding;protein_coding;protein_coding;protein_coding;protein_coding;protein_coding;protein_c…	ENST00000261377.9;ENST00000348433.9;ENST00000563068.1;ENST00000563617.1;ENST00000564274.4;ENST00000565340.4;ENST00000566276.4;ENST00000566518.4;ENST00000566993.4;ENST00000567297.4;ENST00000568046.4;ENST00000568476.4;ENST00000568501.4;ENST00000568647.4;ENST00000568894.4;ENST00000300005.6;ENST00000357967.7;ENST00000562277.4;ENST00000563117.4;ENST00000563537.4;ENST00000564349.4;ENST00000565884.4;ENS…	-153;-175;-362;-811;-352;-278;-206;-317;-150;-411;-99;-271;-181;-311;-83;127;127;-241;330;123;94003;-227;104;104;100;104;126;130	CGI:chr16:20806178-20807192	Island
cg15242225	0.467553	0.234554	0.232999	1.9233e-09	7.6932e-09	chr21	35049560	35049561	RUNX1;RUNX1;RUNX1;RUNX1;RUNX1;RUNX1	protein_coding;protein_coding;protein_coding;protein_coding;protein_coding;protein_coding	ENST00000300305.6;ENST00000416754.1;ENST00000437180.4;ENST00000455571.4;ENST00000475045.5;ENST00000482318.4	-215;-289;-261;-261;955108;-271	CGI:chr21:35026663-35026962	.
cg19378330	0.375705	0.1409	0.234805	4.74976e-05	5.12877e-05	chr10	99846231	99846232	ABCC2	protein_coding	ENST00000370449.7	63498	CGI:chr10:99840130-99840469	.
cg00073003	0.454619	0.216974	0.237645	4.6802e-07	8.00163e-07	chr13	112070269	112070270	SOX1	protein_coding	ENST00000330949.2	2621	CGI:chr13:112066250-112069268	S_Shore
cg00842351	0.609117	0.370702	0.238415	2.82333e-09	1.0949e-08	chr9	69174737	69174738	TJP2;TJP2;TJP2;TJP2;TJP2;TJP2;TJP2	protein_coding;protein_coding;protein_coding;protein_coding;protein_coding;protein_coding;protein_coding	ENST00000265384.10;ENST00000348208.7;ENST00000377245.7;ENST00000377259.4;ENST00000423935.4;ENST00000453658.5;ENST00000606364.4	442;459;571;23090;23086;53472;53428	CGI:chr9:69173799-69174626	S_Shore
cg10017293	0.556208	0.317785	0.238423	3.64368e-06	4.89932e-06	chr12	51246521	51246522	DAZAP2;DAZAP2;SMAGP;SMAGP;SMAGP;SMAGP;SMAGP;SMAGP;SMAGP	protein_coding;protein_coding;protein_coding;protein_coding;protein_coding;protein_coding;protein_coding;protein_coding;protein_coding	ENST00000425012.5;ENST00000604900.4;ENST00000380103.4;ENST00000398453.6;ENST00000603798.4;ENST00000603838.4;ENST00000603864.4;ENST00000605426.4;ENST00000605627.1	7694;7634;22800;23678;24370;23392;23429;23438;23764	CGI:chr12:51238705-51239378	.
cg16551732	0.368833	0.130227	0.238606	1.54551e-08	4.39277e-08	chr4	168877936	168877937	CBR4;CBR4;PALLD;PALLD;PALLD;PALLD;PALLD;PALLD	protein_coding;protein_coding;protein_coding;protein_coding;protein_coding;protein_coding;protein_coding;protein_coding	ENST00000509108.1;ENST00000510042.4;ENST00000261509.9;ENST00000393726.6;ENST00000505667.4;ENST00000507735.4;ENST00000510998.4;ENST00000512127.4	128853;132323;380869;45930;380831;45894;165776;246318	CGI:chr4:168877759-168878474	Island
cg02370667	0.500646	0.262023	0.238623	1.01715e-08	3.14033e-08	chr16	83995906	83995907	NECAB2;NECAB2;NECAB2;NECAB2	protein_coding;protein_coding;protein_coding;protein_coding	ENST00000305202.7;ENST00000565691.4;ENST00000566836.1;ENST00000567703.1	27273;24454;17360;2502	CGI:chr16:83995851-83996105	Island
cg05920961	0.402808	0.161523	0.241285	0.000152049	0.000157497	chr14	101781916	101781917	PPP2R5C;PPP2R5C;PPP2R5C;PPP2R5C;PPP2R5C;PPP2R5C;PPP2R5C	protein_coding;protein_coding;protein_coding;protein_coding;protein_coding;protein_coding;protein_coding	ENST00000328724.8;ENST00000422945.5;ENST00000553890.1;ENST00000554442.4;ENST00000554504.1;ENST00000556068.4;ENST00000557268.4	20030;20117;18987;20053;19010;20053;20015	CGI:chr14:101781323-101781942	Island
cg02466815	0.512141	0.268921	0.24322	1.60894e-07	3.10087e-07	chr2	176189845	176189846	HAGLR;HAGLR;HAGLR;HAGLR;HOXD1	antisense;antisense;antisense;antisense;protein_coding	ENST00000413969.4;ENST00000417086.4;ENST00000425005.4;ENST00000452365.1;ENST00000331462.5	-886;-1304;-1365;-1313;1265	CGI:chr2:176188229-176189622	S_Shore
cg19836199	0.662757	0.392435	0.270322	7.74995e-14	1.97159e-12	chr21	35049644	35049645	RUNX1;RUNX1;RUNX1;RUNX1;RUNX1;RUNX1	protein_coding;protein_coding;protein_coding;protein_coding;protein_coding;protein_coding	ENST00000300305.6;ENST00000416754.1;ENST00000437180.4;ENST00000455571.4;ENST00000475045.5;ENST00000482318.4	-299;-373;-345;-345;955024;-355	CGI:chr21:35026663-35026962	.
cg04915566	0.691872	0.415827	0.276045	7.9905e-12	9.41103e-11	chr21	35049175	35049176	RUNX1;RUNX1;RUNX1;RUNX1;RUNX1;RUNX1	protein_coding;protein_coding;protein_coding;protein_coding;protein_coding;protein_coding	ENST00000300305.6;ENST00000416754.1;ENST00000437180.4;ENST00000455571.4;ENST00000475045.5;ENST00000482318.4	170;96;124;124;955493;114	CGI:chr21:35026663-35026962	.
cg08443845	0.705027	0.421599	0.283428	3.36203e-12	4.54947e-11	chr21	35049658	35049659	RUNX1;RUNX1;RUNX1;RUNX1;RUNX1;RUNX1	protein_coding;protein_coding;protein_coding;protein_coding;protein_coding;protein_coding	ENST00000300305.6;ENST00000416754.1;ENST00000437180.4;ENST00000455571.4;ENST00000475045.5;ENST00000482318.4	-313;-387;-359;-359;955010;-369	CGI:chr21:35026663-35026962	.
cg00225618	0.496252	0.206192	0.29006	3.12814e-09	1.17029e-08	chr3	133673366	133673367	TFP1;TFP1;TFP1	transcribed_unprocessed_pseudogene;transcribed_unprocessed_pseudogene;transcribed_unprocessed_pseudogene	ENST00000460564.4;ENST00000490470.4;ENST00000497521.4	11367;11367;11366	CGI:chr3:133674274-133674813	N_Shore
cg02070685	0.475353	0.166699	0.308654	1.84292e-07	3.44734e-07	chr16	83968765	83968766	NECAB2	protein_coding	ENST00000305202.7	132	CGI:chr16:83968102-83969255	Island
cg04579966	0.45675	0.133093	0.323657	5.1465e-09	1.75977e-08	chr13	24272083	24272084	RP11-307N16.6;SPATA13;SPATA13;SPATA13;SPATA13;SPATA13;SPATA13;SPATA13;SPATA13;SPATA13;SPATA13	protein_coding;protein_coding;protein_coding;protein_coding;protein_coding;protein_coding;protein_coding;protein_coding;protein_coding;protein_coding;protein_coding	ENST00000382141.4;ENST00000343003.9;ENST00000382095.7;ENST00000382108.6;ENST00000399949.5;ENST00000409126.4;ENST00000424834.5;ENST00000434675.4;ENST00000454083.1;ENST00000488060.1;ENST00000494772.4	292382;1395;111334;111366;1394;1363;292277;20388;1241;-607;20364	CGI:chr13:24307960-24308727	.
