# Supplementary material for: Integrated data analysis reveals significant associations of KEAP1 mutations with DNA methylation alterations in lung adenocarcinomas
Source: Aging (Albany NY). 2020 Apr 23;12(8):7183–206. doi: 10.18632/aging.103068 (PMC7202502; doi:10.18632/aging.103068)
Supplement: Supplementary File 9 [file aging-12-103068-s009..xlsx]

## Sheet: keap1 vs wt (t-test linkedomics
Query	Statistic	P-value	FDR (BH)	Event_SD	Event_TD
AKR1C2	6.22577	6.21766e-36	1.24254e-31	83	478
TRIM16L	2.88042	4.17411e-35	4.17077e-31	83	478
NQO1	2.51708	4.12597e-33	2.74845e-29	83	478
SRXN1	2.35742	1.36837e-32	6.83638e-29	83	478
AKR1C1	5.27539	1.12183e-31	4.48373e-28	83	478
PGD	1.72352	1.827e-31	6.08514e-28	83	478
PIR	1.80576	3.18524e-31	9.09341e-28	83	478
AKR1C3	3.43028	4.09871e-31	1.02386e-27	83	478
TXNRD1	2.15745	1.90522e-30	4.23044e-27	83	478
HTATIP2	1.00829	2.55421e-30	5.10433e-27	83	478
PANX2	2.00428	8.95136e-30	1.62622e-26	83	478
SLC7A11	2.57995	2.30472e-29	3.83813e-26	83	478
GPX2	5.18902	9.72222e-29	1.49453e-25	83	478
TRIM16	1.66403	3.76446e-28	5.3735e-25	83	478
GSR	1.49366	6.01693e-27	8.01616e-24	83	478
SLC1A7	-2.83848	1.12493e-26	1.40503e-23	83	478
CABYR	3.02191	1.47413e-26	1.73289e-23	83	478
TALDO1	1.32345	1.27046e-25	1.41049e-22	83	478
GCLM	1.55688	2.33145e-24	2.4522e-21	83	478
OSGIN1	2.3465	4.3189e-24	4.31544e-21	83	478
ABCB6	1.5624	5.579e-24	5.30908e-21	83	478
UGDH	1.73316	8.44505e-23	7.67118e-20	83	478
AKR1B10	5.48934	1.44216e-22	1.2133e-19	83	440
G6PD	1.93433	1.45712e-22	1.2133e-19	83	478
CBX2	1.8631	3.42938e-22	2.74131e-19	83	478
ME1	1.49727	4.08402e-22	3.13904e-19	83	478
AIFM2	1.05516	4.51713e-22	3.34335e-19	83	478
PLAT	-1.50994	2.07788e-21	1.48302e-18	83	478
DARS2	0.755304	2.3967e-21	1.65157e-18	83	478
CYP4F11	3.99073	3.60927e-21	2.40426e-18	83	445
NR0B1	5.10751	1.65254e-20	1.0653e-17	83	226
TXN	1.08807	2.11491e-20	1.32076e-17	83	478
CYP4F3	3.80606	5.50446e-20	3.33336e-17	83	432
UCHL1	2.98583	6.7299e-20	3.9556e-17	83	478
GCLC	2.02595	3.91171e-19	2.23348e-16	83	478
CX3CL1	-1.66778	5.82563e-19	3.23387e-16	83	478
CA10	-2.0185	1.4201e-18	7.67009e-16	83	320
PPP2R2C	3.42393	7.68741e-18	4.04277e-15	83	474
HGD	3.11949	1.51012e-17	7.73802e-15	83	474
CYTH3	-0.923739	1.7023e-17	8.5047e-15	83	478
TSKU	1.30098	1.81123e-17	8.82822e-15	83	478
IDH1	0.945638	2.19541e-17	1.0446e-14	83	478
KIAA0319	2.58993	3.14559e-17	1.4619e-14	83	476
PRDX1	0.870666	5.09037e-17	2.31195e-14	83	478
GALNT10	-1.0132	1.2354e-16	5.48628e-14	83	478
S1PR2	-0.628957	1.95254e-16	8.48253e-14	83	478
FECH	0.830373	2.10392e-16	8.94567e-14	83	478
PTGR1	1.47159	3.0139e-16	1.25479e-13	83	478
BAG2	1.1692	3.57324e-16	1.4573e-13	83	478
GHITM	0.592745	3.80217e-16	1.51965e-13	83	478
MAFG	0.800009	6.49194e-16	2.54382e-13	83	478
NECAB2	2.52893	7.07673e-16	2.71964e-13	83	424
MFSD4	-2.07754	7.49255e-16	2.82512e-13	83	478
NEIL3	1.75752	8.75009e-16	3.23818e-13	83	478
GUCY2E	2.0364	1.36564e-15	4.96201e-13	83	144
MCF2	-0.975071	2.62487e-15	9.36702e-13	83	383
ZPLD1	-1.36594	4.04938e-15	1.4197e-12	83	427
LOC284578	-2.16133	5.51452e-15	1.90004e-12	83	468
KIAA1598	0.753272	6.19758e-15	2.09919e-12	83	478
IFNAR2	-0.728249	8.0965e-15	2.69667e-12	83	478
JAKMIP3	2.21232	8.67872e-15	2.84321e-12	83	468
ISM1	-1.50443	1.35107e-14	4.3548e-12	83	478
AKR1B15	2.95865	1.70549e-14	5.40993e-12	83	352
CYSLTR1	-1.18811	1.92159e-14	6.00018e-12	83	478
SPRED1	-0.720919	2.75156e-14	8.45957e-12	83	478
COX15	0.446999	3.67209e-14	1.11186e-11	83	478
LCA5	-0.912468	4.79625e-14	1.43057e-11	83	478
ALDH3A1	3.54862	5.50759e-14	1.61858e-11	83	475
IL1F7	-2.4243	5.89328e-14	1.70683e-11	83	401
VWA5B1	-0.644723	6.06761e-14	1.73222e-11	83	281
RBMS3	-1.11263	8.59169e-14	2.41826e-11	83	478
CPLX2	4.74855	1.31982e-13	3.66324e-11	83	359
THBS4	-1.95712	2.13839e-13	5.78935e-11	83	477
PRDX6	0.624999	2.14377e-13	5.78935e-11	83	478
ABHD4	0.710197	2.23336e-13	5.95087e-11	83	478
DIRAS3	-1.40562	2.79066e-13	7.33797e-11	83	476
C1orf31	0.771992	2.84535e-13	7.38461e-11	83	478
HHIPL2	2.75275	3.17938e-13	8.14573e-11	83	461
CBR1	1.91808	3.49145e-13	8.83205e-11	83	478
RGL1	-0.924525	3.88166e-13	9.69638e-11	83	478
C20orf24	0.703117	4.56572e-13	1.12644e-10	83	478
COL13A1	-1.31612	4.87276e-13	1.18753e-10	83	478
GPR68	-1.11087	5.20377e-13	1.25292e-10	83	478
SHC3	-1.44109	5.52658e-13	1.3148e-10	83	477
PTPN13	-1.42179	5.80409e-13	1.36458e-10	83	478
PDP1	-0.698508	5.94511e-13	1.38148e-10	83	478
EGOT	-1.19109	6.15495e-13	1.40682e-10	83	444
ABCC2	3.46148	6.19496e-13	1.40682e-10	83	478
NDUFS2	0.444914	6.50768e-13	1.45232e-10	83	478
TSPAN7	1.92054	6.55388e-13	1.45232e-10	83	478
HHLA2	-2.48495	6.61334e-13	1.45232e-10	83	470
COL8A2	-1.22568	7.41498e-13	1.61066e-10	83	478
LRP8	1.05327	7.66558e-13	1.64719e-10	83	478
ACOT13	0.70376	8.72095e-13	1.85404e-10	83	478
CMTM3	-0.846749	9.29194e-13	1.95463e-10	83	478
CNIH3	-1.20258	1.04044e-12	2.16584e-10	83	478
HLA-DQB2	-1.75301	1.102e-12	2.27036e-10	83	478
IL1F9	-1.20125	1.14609e-12	2.33709e-10	83	386
CMBL	1.31909	1.17889e-12	2.37969e-10	83	478
CDC42EP1	-1.0196	1.23564e-12	2.46931e-10	83	478
CBR3	1.71445	1.3003e-12	2.55493e-10	83	478
ADORA1	-1.68598	1.30406e-12	2.55493e-10	83	478
ARHGAP20	-1.4109	1.32757e-12	2.57575e-10	83	478
CCT3	0.487754	1.36535e-12	2.62357e-10	83	478
SYTL2	-1.00848	1.41837e-12	2.6995e-10	83	478
TNC	-1.81786	1.51448e-12	2.83673e-10	83	478
TMEM173	-0.920104	1.51886e-12	2.83673e-10	83	478
SLC16A2	-0.988056	1.66759e-12	3.08566e-10	83	478
C7orf57	-1.43999	1.85929e-12	3.40881e-10	83	471
COL23A1	-0.979815	2.02531e-12	3.67943e-10	83	477
GCNT2	0.663712	2.06968e-12	3.72616e-10	83	478
ZNF217	-0.601589	2.34163e-12	4.17813e-10	83	478
OGFRL1	-0.79835	2.58349e-12	4.5689e-10	83	478
MFAP1	0.405515	2.76148e-12	4.84082e-10	83	478
S100P	2.84568	2.82948e-12	4.9169e-10	83	478
C5orf30	0.791431	3.0374e-12	5.23271e-10	83	478
GSTP1	0.814926	3.09546e-12	5.28716e-10	83	478
GLB1L3	-2.59148	3.12747e-12	5.29656e-10	83	421
TMEM17	0.682749	3.37868e-12	5.67391e-10	83	478
SLC9A1	-0.581272	3.42617e-12	5.70571e-10	83	478
ATIC	0.393398	3.57849e-12	5.91012e-10	83	478
HHATL	-1.15492	3.86275e-12	6.31693e-10	83	288
SCN2B	-1.26803	3.88802e-12	6.31693e-10	83	470
DUSP6	-1.08936	3.97073e-12	6.39929e-10	83	478
HDGF	0.460594	4.44186e-12	7.1013e-10	83	478
RIT1	0.662652	4.73718e-12	7.4826e-10	83	478
LRRC31	-1.90503	4.77661e-12	7.4826e-10	83	462
BCAN	1.8143	4.80353e-12	7.4826e-10	83	469
KCNQ5	-1.67558	4.83014e-12	7.4826e-10	83	477
MYBPH	-1.74663	4.9158e-12	7.55672e-10	83	448
SLC48A1	0.616576	5.28546e-12	8.06296e-10	83	478
TP53INP1	-0.709806	6.77309e-12	1.0254e-09	83	478
CLEC5A	-1.27789	7.26685e-12	1.08471e-09	83	478
ADRB2	-1.17447	7.27337e-12	1.08471e-09	83	478
ALOX5AP	-1.12494	8.03922e-12	1.19004e-09	83	478
MEF2C	-0.762319	8.36439e-12	1.22907e-09	83	478
C2orf47	0.385973	8.49883e-12	1.23971e-09	83	478
CDH11	-0.959921	8.56126e-12	1.23977e-09	83	478
SCO1	0.365286	8.77143e-12	1.26107e-09	83	478
TIMP3	-0.848362	8.88259e-12	1.26793e-09	83	478
PFN2	1.1726	9.06826e-12	1.28525e-09	83	478
LRRTM1	-1.44361	9.41856e-12	1.3255e-09	83	341
MMP23B	-0.837978	9.99047e-12	1.39264e-09	83	478
SEPX1	0.87579	1.00554e-11	1.39264e-09	83	478
GTPBP4	0.453611	1.01047e-11	1.39264e-09	83	478
IL1RAP	-1.00946	1.0193e-11	1.39519e-09	83	478
TMSL3	-0.734288	1.04592e-11	1.42188e-09	83	478
DNAH11	-1.99516	1.16632e-11	1.57485e-09	83	478
LSP1	-0.858112	1.30572e-11	1.75124e-09	83	478
IVL	-2.38826	1.33529e-11	1.77877e-09	83	419
NDUFS1	0.447195	1.35274e-11	1.77877e-09	83	478
MYO1G	-1.25117	1.35295e-11	1.77877e-09	83	478
C6orf97	-1.16769	1.39975e-11	1.82828e-09	83	478
MRC2	-0.851742	1.68704e-11	2.1892e-09	83	478
GLI3	-1.05228	1.7689e-11	2.28062e-09	83	478
PDLIM4	-1.27731	1.83225e-11	2.34716e-09	83	478
LYST	-0.631579	1.85218e-11	2.35757e-09	83	478
FAM119A	0.39692	2.00097e-11	2.51939e-09	83	478
NUDT5	0.502254	2.00658e-11	2.51939e-09	83	478
SAMD4A	-0.997653	2.01713e-11	2.51939e-09	83	478
CSF1	-1.01658	2.20069e-11	2.73159e-09	83	478
SDHC	0.514455	2.26801e-11	2.79777e-09	83	478
FAT4	-1.04072	2.34032e-11	2.86926e-09	83	478
LOC285593	-0.717389	2.56653e-11	3.1274e-09	83	449
SLC3A2	0.561481	2.61696e-11	3.16954e-09	83	478
NYNRIN	-1.04278	3.05575e-11	3.67869e-09	83	478
C1orf182	1.12973	3.07632e-11	3.68126e-09	83	468
KCNA3	-1.25383	3.15397e-11	3.75173e-09	83	477
GRAMD3	-0.600113	3.36129e-11	3.97467e-09	83	478
SLFN12	-0.940497	3.4515e-11	4.05734e-09	83	478
TPD52L1	1.11704	3.47496e-11	4.06103e-09	83	478
ATP10A	-1.17404	3.53828e-11	4.11099e-09	83	478
ITGB8	-1.91106	3.66305e-11	4.21442e-09	83	478
KANK2	-0.526159	3.66948e-11	4.21442e-09	83	478
MRPS16	0.414274	4.08536e-11	4.66524e-09	83	478
TK2	-0.499865	4.1737e-11	4.71806e-09	83	478
RASGRF1	-1.67358	4.18047e-11	4.71806e-09	83	478
SOD1	0.52114	4.20244e-11	4.71806e-09	83	478
LIX1L	-0.663236	4.27693e-11	4.77487e-09	83	478
ICAM1	-1.04623	4.36652e-11	4.8478e-09	83	478
C16orf63	0.461851	4.39829e-11	4.8561e-09	83	478
FCGBP	-1.60231	4.51985e-11	4.96289e-09	83	478
ARMC9	-0.705392	4.58451e-11	5.00638e-09	83	478
LRIG3	-0.970243	4.87291e-11	5.2924e-09	83	478
C14orf64	-1.31066	4.99518e-11	5.38565e-09	83	473
RNF19A	-0.602658	5.0272e-11	5.38565e-09	83	478
AXL	-0.831357	5.03961e-11	5.38565e-09	83	478
CYP2U1	-0.645594	5.14136e-11	5.46516e-09	83	478
FGF10	-0.430702	5.39151e-11	5.70074e-09	83	219
TDP2	0.69441	5.51454e-11	5.80014e-09	83	478
SMURF2	-0.673621	5.59195e-11	5.85077e-09	83	478
SQSTM1	0.61234	5.94306e-11	6.18574e-09	83	478
TLR2	-1.0371	6.13579e-11	6.35324e-09	83	478
FAM198A	-0.962439	6.51262e-11	6.70867e-09	83	478
ZNF709	-0.65354	6.63454e-11	6.79922e-09	83	478
MICAL2	-0.8519	6.72485e-11	6.8566e-09	83	478
NMB	1.1764	6.82726e-11	6.92568e-09	83	478
SYT12	-2.0468	7.46831e-11	7.53772e-09	83	478
LRRN4	-1.96373	7.53612e-11	7.56793e-09	83	478
FNIP2	-1.06782	8.12775e-11	8.12125e-09	83	478
WBSCR17	-1.2836	8.26885e-11	8.22113e-09	83	477
ACSL3	0.568705	8.34024e-11	8.25106e-09	83	478
FABP3	-1.1832	8.86339e-11	8.72542e-09	83	478
VIM	-0.72705	8.92927e-11	8.74718e-09	83	478
FBXW10	1.32429	9.21364e-11	8.98172e-09	83	425
C5orf62	-0.80647	9.43244e-11	9.1069e-09	83	478
CACYBP	0.456371	9.43319e-11	9.1069e-09	83	478
ZBTB47	-0.511422	9.55079e-11	9.1761e-09	83	478
SLC6A20	-2.06041	9.67159e-11	9.24771e-09	83	472
MGST1	0.961448	9.82788e-11	9.34493e-09	83	478
DPYD	-1.06143	9.8668e-11	9.34493e-09	83	478
NDUFA10	0.345377	9.98554e-11	9.41278e-09	83	478
TLE4	-0.834345	1.03913e-10	9.74927e-09	83	478
LOC646851	-0.996178	1.06314e-10	9.92797e-09	83	478
BZRAP1	-1.13327	1.07495e-10	9.99153e-09	83	478
NRG4	1.65144	1.11907e-10	1.03535e-08	83	443
SPRYD5	-0.299105	1.21763e-10	1.12134e-08	83	147
ASF1A	0.537854	1.22655e-10	1.12438e-08	83	478
SHISA3	-1.71796	1.31489e-10	1.19985e-08	83	475
MXRA7	-0.750624	1.36531e-10	1.24019e-08	83	478
FAM176A	-1.0745	1.38892e-10	1.25593e-08	83	478
CCDC8	-0.90424	1.42393e-10	1.27812e-08	83	478
COLEC12	-1.23839	1.42938e-10	1.27812e-08	83	478
SSPN	-0.885873	1.43264e-10	1.27812e-08	83	478
EFEMP2	-0.654864	1.44785e-10	1.28595e-08	83	478
C2orf89	-1.21631	1.52691e-10	1.34925e-08	83	478
LOXL1	-0.818411	1.53262e-10	1.34925e-08	83	478
BHLHE41	-1.0934	1.5484e-10	1.35716e-08	83	478
RNASE6	-0.832691	1.5808e-10	1.37951e-08	83	478
EFHC2	-1.52204	1.72618e-10	1.49983e-08	83	476
FADS6	-1.31183	1.74213e-10	1.50713e-08	83	312
TBCE	0.487807	1.77056e-10	1.52512e-08	83	478
GULP1	1.0095	1.81561e-10	1.55722e-08	83	478
PLK3	-0.583902	1.94513e-10	1.66117e-08	83	478
VSIG1	-2.02728	1.96392e-10	1.67009e-08	83	478
ZFP57	-1.37299	1.98558e-10	1.67724e-08	83	424
EHD4	-0.427206	1.98912e-10	1.67724e-08	83	478
FXYD4	2.75919	2.01928e-10	1.69552e-08	83	335
TGFB1	-0.723698	2.15041e-10	1.79066e-08	83	478
DOCK10	-1.0172	2.15052e-10	1.79066e-08	83	478
LPAR6	-0.677406	2.16524e-10	1.79544e-08	83	478
PSMD4	0.428263	2.23065e-10	1.84204e-08	83	478
CRYGN	-1.19157	2.28143e-10	1.87622e-08	83	417
C1orf57	0.628195	2.4372e-10	1.99611e-08	83	478
FCHSD2	-0.390672	2.45114e-10	1.99933e-08	83	478
DCLRE1A	0.467788	2.47018e-10	2.00667e-08	83	478
POM121L1P	-0.648484	2.52629e-10	2.04394e-08	83	428
TRIM53	-0.476154	2.56768e-10	2.06905e-08	83	203
PRPSAP2	0.410295	2.65423e-10	2.13021e-08	83	478
HS3ST5	-1.47481	2.71359e-10	2.16115e-08	83	426
ANKRD34B	-1.76817	2.71442e-10	2.16115e-08	83	431
TRIM55	-1.21946	2.72897e-10	2.16412e-08	83	449
GSG1L	-0.459894	2.80035e-10	2.21195e-08	83	277
SORD	0.625732	2.89104e-10	2.27459e-08	83	478
KCNK5	-1.2377	3.05442e-10	2.3937e-08	83	478
WSCD2	-1.03483	3.15676e-10	2.46425e-08	83	463
SYNPO	-0.679912	3.21162e-10	2.49732e-08	83	478
MAP3K3	-0.515606	3.33601e-10	2.58201e-08	83	478
WIPF3	1.29978	3.34638e-10	2.58201e-08	83	472
HPGDS	-1.29736	3.3605e-10	2.58293e-08	83	478
GLS	-0.911938	3.45089e-10	2.64225e-08	83	478
HLF	-1.49136	3.51597e-10	2.6818e-08	83	478
MRPL44	0.322866	3.53557e-10	2.6865e-08	83	478
TRIM22	-0.766749	3.68342e-10	2.77948e-08	83	478
ZNF737	-1.03711	3.68577e-10	2.77948e-08	83	478
TMEM109	-0.387198	3.75229e-10	2.81901e-08	83	478
TKT	0.677987	3.77457e-10	2.82513e-08	83	478
GPR110	-2.52811	3.94332e-10	2.94042e-08	83	476
DUSP7	-0.572548	4.0966e-10	3.04312e-08	83	478
PPP3R1	0.352666	4.1115e-10	3.04312e-08	83	478
ZNF177	-0.783269	4.16901e-10	3.0743e-08	83	478
FTH1	0.522884	4.19937e-10	3.0853e-08	83	478
ZNF788	-0.822318	4.22061e-10	3.08955e-08	83	478
MFF	0.59054	4.31318e-10	3.14579e-08	83	478
NHS	-1.19014	4.36555e-10	3.1724e-08	83	478
TMEM14A	0.672355	4.38404e-10	3.1743e-08	83	478
FTL	0.736187	4.44477e-10	3.20051e-08	83	478
FLAD1	0.476226	4.45227e-10	3.20051e-08	83	478
APOA1BP	0.594554	4.48228e-10	3.21053e-08	83	478
BNIP3	0.692543	4.9014e-10	3.49462e-08	83	478
FTHL3	0.579315	4.91388e-10	3.49462e-08	83	478
C6orf15	-0.804522	5.05242e-10	3.58041e-08	83	239
TRIB1	-0.597621	5.23132e-10	3.69409e-08	83	478
IFFO2	-0.702547	5.2856e-10	3.71928e-08	83	478
PTPN22	-1.06811	5.40173e-10	3.78123e-08	83	478
GPR88	-0.91929	5.41149e-10	3.78123e-08	83	464
SLCO2A1	-0.975166	5.54231e-10	3.85915e-08	83	478
ZNF439	-0.955688	5.57488e-10	3.86834e-08	83	478
UCHL5	0.367349	5.62939e-10	3.89265e-08	83	478
ITGB3	-1.16354	5.84027e-10	4.02126e-08	83	478
MTMR2	0.406073	5.85561e-10	4.02126e-08	83	478
RASGRP4	-0.912633	6.13146e-10	4.19627e-08	83	478
PRDX3	0.433666	6.20916e-10	4.23494e-08	83	478
GGA2	-0.373558	6.30824e-10	4.28788e-08	83	478
NCF4	-0.811925	6.43779e-10	4.36111e-08	83	478
CDH20	-0.903522	6.55732e-10	4.42707e-08	83	385
APOB48R	-0.825087	6.85931e-10	4.61255e-08	83	478
PNMAL2	-0.977763	6.87821e-10	4.61255e-08	83	477
HERC6	-0.708786	6.95744e-10	4.63913e-08	83	478
POPDC3	2.15452	6.96427e-10	4.63913e-08	83	434
E2F6	0.384304	7.28042e-10	4.83362e-08	83	478
ANXA7	0.311043	7.65968e-10	5.06858e-08	83	478
IL1R1	-0.736738	7.83874e-10	5.16995e-08	83	478
LOC100133669	-1.20005	8.2322e-10	5.41159e-08	83	460
PLA2G15	-0.462444	8.35837e-10	5.47651e-08	83	478
EPT1	0.572882	8.41763e-10	5.49731e-08	83	478
BCAS4	-0.692101	8.53562e-10	5.55621e-08	83	478
HRG	0.973356	8.6652e-10	5.62225e-08	83	255
IGDCC4	-0.840014	9.14841e-10	5.91656e-08	83	478
ZSCAN4	-1.1046	9.17859e-10	5.91693e-08	83	378
GNAI2	-0.397306	9.2946e-10	5.97245e-08	83	478
FAM48B1	-0.162659	9.72677e-10	6.22834e-08	83	130
EFS	-1.18563	9.75515e-10	6.22834e-08	83	478
ST3GAL2	-0.574929	9.80909e-10	6.22983e-08	83	478
KRT32	-0.91049	9.81984e-10	6.22983e-08	83	299
ENDOD1	-0.813465	9.90052e-10	6.24357e-08	83	478
FILIP1L	-0.771963	9.90398e-10	6.24357e-08	83	478
CD207	-1.80519	1.00335e-09	6.30532e-08	83	471
LY6E	-1.06683	1.04507e-09	6.54694e-08	83	478
NAA20	0.543954	1.05426e-09	6.58385e-08	83	478
FLJ42709	-0.867724	1.06736e-09	6.64492e-08	83	478
PTPLA	1.24243	1.09148e-09	6.77397e-08	83	478
CA8	1.92346	1.13603e-09	7.02859e-08	83	472
TIAM2	-0.68687	1.20018e-09	7.40259e-08	83	478
WDR66	-1.26758	1.22601e-09	7.53862e-08	83	478
GDF11	-0.678904	1.24345e-09	7.61809e-08	83	478
CYR61	-0.880972	1.24655e-09	7.61809e-08	83	478
TMEM14B	0.468789	1.29525e-09	7.89155e-08	83	478
ANKRD55	-0.762438	1.39338e-09	8.4636e-08	83	457
CLDN9	-1.5239	1.45961e-09	8.83905e-08	83	477
C9orf44	-0.464385	1.50652e-09	9.09559e-08	83	321
FLJ35776	0.855468	1.59208e-09	9.58316e-08	83	478
ZNF154	-0.865229	1.62601e-09	9.74599e-08	83	478
EML4	-0.574427	1.62888e-09	9.74599e-08	83	478
KRT75	-0.85933	1.63997e-09	9.78305e-08	83	241
INPP5D	-0.815141	1.65967e-09	9.87111e-08	83	478
CUTC	0.438387	1.71148e-09	1.0149e-07	83	478
TRUB2	0.46754	1.72072e-09	1.01736e-07	83	478
HOXD1	-1.58549	1.78706e-09	1.05347e-07	83	478
NACAD	-0.961934	1.79776e-09	1.0542e-07	83	478
GAS7	-0.861819	1.79885e-09	1.0542e-07	83	478
CACNB1	-0.925342	1.82366e-09	1.06561e-07	83	478
CDC42EP3	-0.640122	1.93231e-09	1.12581e-07	83	478
CLEC4F	-1.06674	1.97188e-09	1.14552e-07	83	443
LOC643008	-1.17157	1.99779e-09	1.15721e-07	83	477
KERA	-0.770101	2.01455e-09	1.16355e-07	83	427
HS3ST1	-0.922195	2.02634e-09	1.16699e-07	83	478
C18orf1	-0.856391	2.10605e-09	1.20941e-07	83	478
SELPLG	-0.756362	2.16035e-09	1.23668e-07	83	478
TRANK1	-0.603484	2.16592e-09	1.23668e-07	83	478
FXR2	0.364395	2.18361e-09	1.24323e-07	83	478
CDH3	-1.86593	2.24737e-09	1.26922e-07	83	478
KCNJ15	-1.35162	2.24766e-09	1.26922e-07	83	478
SLC16A14	1.51837	2.25131e-09	1.26922e-07	83	478
PCCB	0.419505	2.25466e-09	1.26922e-07	83	478
ZFP36L1	-0.664522	2.40163e-09	1.3465e-07	83	478
PPP2R5B	-0.535081	2.40543e-09	1.3465e-07	83	478
FAM129A	-0.887372	2.43979e-09	1.36192e-07	83	478
SLC43A3	-0.874279	2.45409e-09	1.36609e-07	83	478
C1orf43	0.43797	2.48845e-09	1.38137e-07	83	478
SHISA6	-0.629884	2.50628e-09	1.38741e-07	83	316
PHLDB1	-0.578814	2.55863e-09	1.4099e-07	83	478
IFI44L	-1.21518	2.56101e-09	1.4099e-07	83	478
CHST6	-1.44396	2.57017e-09	1.41105e-07	83	478
SNX18	-0.456996	2.59895e-09	1.42294e-07	83	478
WDR12	0.475374	2.65487e-09	1.44959e-07	83	478
EMB	-0.954674	2.671e-09	1.45442e-07	83	478
SLC34A2	-1.89286	2.6935e-09	1.46269e-07	83	478
PCOLCE	-0.700621	2.70903e-09	1.46713e-07	83	478
CARD14	1.43089	2.72186e-09	1.4701e-07	83	478
RSAD2	-0.935632	2.73053e-09	1.47081e-07	83	478
SENP3	0.293114	2.78747e-09	1.49744e-07	83	478
CCDC37	-1.12328	2.81845e-09	1.51002e-07	83	377
EGF	1.36131	2.82808e-09	1.51113e-07	83	477
NLGN2	-0.674171	2.96508e-09	1.58011e-07	83	478
PLEKHG1	-0.713228	3.00477e-09	1.59659e-07	83	478
ADCY9	-0.649591	3.01197e-09	1.59659e-07	83	478
PSMD14	0.422959	3.02391e-09	1.59867e-07	83	478
SYNJ1	-0.504598	3.07733e-09	1.62262e-07	83	478
TRIL	-0.90739	3.17558e-09	1.6683e-07	83	478
PRICKLE1	-0.832304	3.18065e-09	1.6683e-07	83	478
LRP1B	1.7718	3.39638e-09	1.77679e-07	83	328
IRS1	-0.993407	3.47797e-09	1.81472e-07	83	478
ARHGEF6	-0.732445	3.50902e-09	1.82615e-07	83	478
RBM34	0.353501	3.54572e-09	1.84046e-07	83	478
POM121L9P	-0.809712	3.55493e-09	1.84046e-07	83	478
DMBX1	-1.49136	3.61812e-09	1.86834e-07	83	445
KCTD12	-0.74272	3.6687e-09	1.88957e-07	83	478
OPN3	1.12937	3.69416e-09	1.89779e-07	83	478
MAP3K1	-0.464631	3.74952e-09	1.91928e-07	83	478
SGCD	-0.853084	3.7552e-09	1.91928e-07	83	478
CD101	-0.829235	3.82775e-09	1.95137e-07	83	478
UGT1A6	3.47178	3.84741e-09	1.9564e-07	83	442
BOC	-0.745241	3.98125e-09	2.01932e-07	83	478
ZNF440	-0.629294	4.00052e-09	2.02396e-07	83	478
C15orf63	0.566913	4.0354e-09	2.03645e-07	83	478
TMEM86A	-0.57132	4.08733e-09	2.05746e-07	83	478
CD74	-0.901	4.313e-09	2.1656e-07	83	478
CCR6	-0.874478	4.32509e-09	2.16623e-07	83	478
2019-09-11	-0.640132	4.35832e-09	2.17742e-07	83	478
COG2	0.347291	4.41163e-09	2.19855e-07	83	478
AGPAT9	0.999275	4.52335e-09	2.23996e-07	83	478
SRP9	0.388336	4.52803e-09	2.23996e-07	83	478
PADI1	-1.64308	4.52834e-09	2.23996e-07	83	418
TEKT3	-0.822299	4.56352e-09	2.25179e-07	83	456
FH	0.355282	4.60887e-09	2.26856e-07	83	478
LOC283867	-0.891009	4.86006e-09	2.37893e-07	83	460
PDE1B	-0.781573	4.86287e-09	2.37893e-07	83	478
SESN2	-0.446314	4.86881e-09	2.37893e-07	83	478
PKD2	-0.521203	4.88276e-09	2.37993e-07	83	478
IFI44	-1.00373	4.95547e-09	2.40647e-07	83	478
WNT10A	-1.30945	4.9613e-09	2.40647e-07	83	478
CHAT	-0.666464	5.00835e-09	2.42341e-07	83	127
TREM2	-0.907602	5.20923e-09	2.51452e-07	83	478
HIPK1	-0.436622	5.27421e-09	2.53975e-07	83	478
PKD1L2	1.75331	5.28751e-09	2.54004e-07	83	461
HLA-DPA1	-0.982681	5.37573e-09	2.57623e-07	83	478
MEGF6	-0.846227	5.40091e-09	2.5821e-07	83	478
EFNB3	-1.13019	5.41608e-09	2.58317e-07	83	478
PLD4	-1.07764	5.44999e-09	2.59316e-07	83	478
PPARGC1A	1.65292	5.47133e-09	2.59713e-07	83	477
IFT57	-0.795604	5.57545e-09	2.64028e-07	83	478
ADAMTS14	-1.03755	5.7201e-09	2.70238e-07	83	478
APITD1	0.449089	5.925e-09	2.79258e-07	83	478
ITGA2	-1.22498	5.95733e-09	2.8012e-07	83	478
GAB1	-0.53841	6.02869e-09	2.82811e-07	83	478
PGAP2	0.348527	6.05572e-09	2.83413e-07	83	478
KYNU	1.81553	6.07413e-09	2.83611e-07	83	478
FLNA	-0.785994	6.1292e-09	2.85515e-07	83	478
CDC73	0.266925	6.23373e-09	2.89709e-07	83	478
ACBD6	0.356788	6.2524e-09	2.89903e-07	83	478
DNTTIP2	0.368454	6.27346e-09	2.90206e-07	83	478
CST6	-1.58027	6.87164e-09	3.17143e-07	83	477
ALDH1A3	-1.10288	6.95037e-09	3.19872e-07	83	478
RFX2	-0.746433	6.96278e-09	3.19872e-07	83	478
B4GALNT3	-1.10371	7.01818e-09	3.21678e-07	83	478
C1QBP	0.542424	7.10785e-09	3.25042e-07	83	478
ZNF136	-0.46525	7.13909e-09	3.25725e-07	83	478
TMCO1	0.399835	7.20121e-09	3.27811e-07	83	478
MAP2	1.38577	7.33692e-09	3.3323e-07	83	478
VAV1	-0.989523	7.41017e-09	3.35608e-07	83	478
RFWD2	0.281107	7.42287e-09	3.35608e-07	83	478
C6orf123	-0.781344	7.4423e-09	3.35727e-07	83	473
PAH	2.6098	7.57376e-09	3.4039e-07	83	369
RCCD1	0.518408	7.57974e-09	3.4039e-07	83	478
SKI	-0.484052	7.74601e-09	3.47077e-07	83	478
GAPT	-0.86844	7.85972e-09	3.51384e-07	83	478
ATXN1	-0.477891	7.89868e-09	3.52337e-07	83	478
ZNF211	-0.615899	8.21467e-09	3.65617e-07	83	478
CCDC13	-0.836471	8.24006e-09	3.65932e-07	83	476
PXK	-0.51156	8.30819e-09	3.67467e-07	83	478
ZSWIM4	-0.534462	8.3114e-09	3.67467e-07	83	478
PIGC	0.336401	8.34545e-09	3.68158e-07	83	478
GLDN	-0.99764	8.76773e-09	3.85934e-07	83	478
CDC123	0.334818	9.34053e-09	4.09397e-07	83	478
ST3GAL6	-0.714714	9.35144e-09	4.09397e-07	83	478
C19orf66	-0.37926	9.36222e-09	4.09397e-07	83	478
TNFSF10	-0.873759	9.42662e-09	4.11313e-07	83	478
COX10	0.320008	9.48067e-09	4.1277e-07	83	478
ACTB	-0.336904	9.56367e-09	4.15479e-07	83	478
NDP	-1.1422	9.6431e-09	4.18021e-07	83	433
HLA-DOA	-1.00504	9.76419e-09	4.22354e-07	83	478
PODN	-0.79254	1.01058e-08	4.36188e-07	83	478
ALDH3A2	0.852081	1.01399e-08	4.36715e-07	83	478
MFAP2	-0.809168	1.02734e-08	4.41515e-07	83	478
ACP1	0.305538	1.03343e-08	4.43178e-07	83	478
CWF19L1	0.450086	1.05398e-08	4.5102e-07	83	478
LAT2	-0.802678	1.06007e-08	4.52495e-07	83	478
C1orf131	0.318942	1.06195e-08	4.52495e-07	83	478
GPR132	-0.817687	1.06515e-08	4.52893e-07	83	478
CHML	0.844565	1.07764e-08	4.57192e-07	83	478
RSBN1	-0.374172	1.07984e-08	4.57192e-07	83	478
GALNT5	-1.22921	1.09311e-08	4.61833e-07	83	478
LPCAT2	-0.666912	1.11632e-08	4.70645e-07	83	478
CSMD2	-0.975353	1.12683e-08	4.74074e-07	83	477
PIK3CD	-0.667936	1.13861e-08	4.76923e-07	83	478
N4BP2L1	-0.704087	1.13969e-08	4.76923e-07	83	478
CORO1A	-0.769527	1.14076e-08	4.76923e-07	83	478
FBLN1	-0.743854	1.14919e-08	4.79443e-07	83	478
SPI1	-0.809621	1.16835e-08	4.86425e-07	83	478
SHROOM4	-0.951492	1.18171e-08	4.90962e-07	83	478
EIF5AL1	0.457183	1.23065e-08	5.10161e-07	83	478
ISLR	-0.844082	1.2341e-08	5.10161e-07	83	478
ADI1	0.634892	1.23558e-08	5.10161e-07	83	478
PSD2	-0.732871	1.23858e-08	5.10345e-07	83	434
DAPP1	-0.923628	1.25277e-08	5.15131e-07	83	478
COL21A1	-1.41824	1.26377e-08	5.18589e-07	83	478
ADORA3	-0.86093	1.28409e-08	5.25846e-07	83	478
BTK	-0.860648	1.2942e-08	5.28902e-07	83	478
CCDC77	0.455773	1.33125e-08	5.42302e-07	83	478
PSMD1	0.277006	1.33402e-08	5.42302e-07	83	478
FIBIN	-0.828079	1.33513e-08	5.42302e-07	83	478
BMP3	-1.6289	1.36969e-08	5.5521e-07	83	477
HTRA1	-0.691511	1.39033e-08	5.62436e-07	83	478
RUNX2	-0.679799	1.41265e-08	5.70312e-07	83	478
PGA5	-0.361322	1.43061e-08	5.76399e-07	83	164
C16orf54	-0.860467	1.46207e-08	5.87887e-07	83	478
SCARB1	0.734654	1.47592e-08	5.91688e-07	83	478
PSMB6	0.438351	1.47744e-08	5.91688e-07	83	478
ANO1	-0.930073	1.53548e-08	6.13187e-07	83	478
PIM3	0.585151	1.53726e-08	6.13187e-07	83	478
RASSF8	-0.83641	1.5644e-08	6.2277e-07	83	478
C19orf35	-0.701376	1.57629e-08	6.26256e-07	83	476
ADSSL1	1.05111	1.5851e-08	6.26583e-07	83	478
TLN2	-0.7348	1.58558e-08	6.26583e-07	83	478
RNF175	-0.884738	1.58652e-08	6.26583e-07	83	476
ITGAM	-0.99323	1.63458e-08	6.43105e-07	83	478
SPON1	-0.892606	1.63479e-08	6.43105e-07	83	478
OLFML1	-0.618539	1.65569e-08	6.49836e-07	83	478
MNDA	-0.92982	1.65841e-08	6.49836e-07	83	478
KCNMB1	-0.855146	1.66843e-08	6.52485e-07	83	478
LYNX1	-1.07615	1.67561e-08	6.54013e-07	83	478
EDNRA	-0.724576	1.68957e-08	6.5712e-07	83	478
STAC	-1.28441	1.69015e-08	6.5712e-07	83	478
C10orf57	0.534635	1.70178e-08	6.59188e-07	83	478
NOTCH2	-0.609638	1.70207e-08	6.59188e-07	83	478
INSL4	2.72656	1.8369e-08	7.1003e-07	83	225
PLB1	-0.791335	1.85727e-08	7.16027e-07	83	478
WLS	-0.925467	1.85958e-08	7.16027e-07	83	478
PLXDC2	-0.740275	1.87118e-08	7.17666e-07	83	478
PTPRO	-0.982648	1.87358e-08	7.17666e-07	83	478
ZNF462	-1.18427	1.87461e-08	7.17666e-07	83	478
IARS2	0.339486	1.88888e-08	7.21746e-07	83	478
CHST3	-1.02512	1.91517e-08	7.30159e-07	83	478
TSNAX	0.455089	1.9182e-08	7.30159e-07	83	478
VDAC2	0.462244	1.9361e-08	7.35571e-07	83	478
HLA-DPB1	-0.895082	1.94074e-08	7.35934e-07	83	478
ODF1	-0.161661	1.94877e-08	7.37555e-07	83	95
AHR	-0.723261	1.9524e-08	7.37555e-07	83	478
BTBD11	1.49068	1.97548e-08	7.44867e-07	83	478
ITGB2	-0.969122	1.98428e-08	7.45962e-07	83	478
TREML3	1.32635	1.98585e-08	7.45962e-07	83	451
FMNL3	-0.532849	1.9913e-08	7.46608e-07	83	478
CERKL	-0.782296	2.00212e-08	7.49258e-07	83	478
RCBTB2	-0.520489	2.00667e-08	7.49555e-07	83	478
CD37	-0.7676	2.0214e-08	7.53164e-07	83	478
YWHAE	0.339575	2.02387e-08	7.53164e-07	83	478
CES1	2.01479	2.03183e-08	7.54723e-07	83	478
LOC651250	-0.50768	2.09394e-08	7.75073e-07	83	478
MYD88	-0.382879	2.09437e-08	7.75073e-07	83	478
MAPK10	-1.04791	2.10964e-08	7.7928e-07	83	478
RUNX1	-0.517915	2.11671e-08	7.8045e-07	83	478
SFXN4	0.46701	2.12257e-08	7.81169e-07	83	478
SPRY2	-0.553774	2.12995e-08	7.82443e-07	83	478
GMIP	-0.410721	2.16625e-08	7.94317e-07	83	478
KCTD10	-0.235362	2.18253e-08	7.98821e-07	83	478
CXorf21	-0.777558	2.24056e-08	8.18561e-07	83	478
ZNF441	-0.537436	2.24886e-08	8.20095e-07	83	478
C8orf31	-1.18188	2.31587e-08	8.42993e-07	83	477
DBC1	-1.80175	2.33506e-08	8.48434e-07	83	456
CTSH	-0.857034	2.45405e-08	8.90048e-07	83	478
C13orf18	-0.883523	2.47506e-08	8.94601e-07	83	478
PAG1	-0.777774	2.47555e-08	8.94601e-07	83	478
PBX4	-0.725693	2.49048e-08	8.97493e-07	83	478
WDR91	-0.555796	2.49254e-08	8.97493e-07	83	478
ATP8B4	-0.742066	2.55979e-08	9.20052e-07	83	478
LILRA2	-1.00159	2.56528e-08	9.20368e-07	83	478
DDO	-0.885254	2.58468e-08	9.24855e-07	83	477
AAMP	0.275779	2.58704e-08	9.24855e-07	83	478
MYLK	-0.671946	2.63637e-08	9.40806e-07	83	478
PIK3R6	-0.813641	2.6535e-08	9.45232e-07	83	478
CEACAM21	-0.868569	2.66749e-08	9.48524e-07	83	478
GSPT2	-0.908493	2.71863e-08	9.64993e-07	83	478
LRRN4CL	-0.765104	2.75464e-08	9.75891e-07	83	478
DOK4	-0.81815	2.7591e-08	9.75891e-07	83	478
CLEC7A	-0.901308	2.78913e-08	9.83584e-07	83	478
CD40	-0.838206	2.79513e-08	9.83584e-07	83	478
HLA-DMB	-0.894807	2.79561e-08	9.83584e-07	83	478
TIMM17A	0.329539	2.80605e-08	9.8552e-07	83	478
PML	-0.475803	2.81967e-08	9.88565e-07	83	478
MAML2	-0.876105	2.83549e-08	9.92371e-07	83	478
UBA7	-0.564765	2.84975e-08	9.95619e-07	83	478
PRRT3	-0.64653	2.86078e-08	9.9773e-07	83	478
PTGER2	-0.880338	2.88542e-08	1.00457e-06	83	478
NOP58	0.316833	2.92271e-08	1.01578e-06	83	478
AMICA1	-0.8271	2.94418e-08	1.02147e-06	83	478
SAMHD1	-0.79945	2.96306e-08	1.02624e-06	83	478
NLRC4	-0.722904	3.01516e-08	1.04247e-06	83	478
LGALS9	-0.69289	3.02106e-08	1.04271e-06	83	478
ZNF334	-1.15402	3.12848e-08	1.07792e-06	83	478
STK17A	-0.560455	3.13811e-08	1.07874e-06	83	478
DUSP13	1.85333	3.14165e-08	1.07874e-06	83	418
SOCS1	-0.706514	3.19456e-08	1.09451e-06	83	478
DOCK8	-0.726722	3.19854e-08	1.09451e-06	83	478
CD1A	-1.64085	3.27774e-08	1.1197e-06	83	472
TSHZ3	-0.705847	3.32489e-08	1.13387e-06	83	478
C2orf81	-0.745394	3.39206e-08	1.1548e-06	83	478
ZNF253	-0.548265	3.41565e-08	1.16086e-06	83	478
AQP1	-1.04233	3.43458e-08	1.16402e-06	83	478
ZNF267	-0.396661	3.4366e-08	1.16402e-06	83	478
ATP13A4	-1.65206	3.45247e-08	1.16741e-06	83	474
LPCAT1	-0.951819	3.4764e-08	1.17352e-06	83	478
MTMR3	-0.454556	3.48962e-08	1.176e-06	83	478
CREB5	-0.925533	3.52091e-08	1.18454e-06	83	478
RPS6KA3	-0.45377	3.53327e-08	1.1867e-06	83	478
MORC3	-0.304793	3.58385e-08	1.20167e-06	83	478
MRPL24	0.546233	3.64134e-08	1.2189e-06	83	478
ESYT1	-0.320221	3.72597e-08	1.2438e-06	83	478
SIGLEC11	-0.902924	3.72816e-08	1.2438e-06	83	472
TMEM93	0.446053	3.77312e-08	1.2567e-06	83	478
UGT1A3	1.47218	3.7968e-08	1.26248e-06	83	141
DCBLD1	-0.519637	3.80438e-08	1.2629e-06	83	478
ZNF430	-0.625557	3.81853e-08	1.2655e-06	83	478
RGS10	-0.709748	3.83122e-08	1.2676e-06	83	478
SPATS1	-0.686627	3.85419e-08	1.27309e-06	83	296
AHDC1	-0.516542	3.96124e-08	1.30614e-06	83	478
ARMC3	-1.39621	3.9673e-08	1.30614e-06	83	459
ENSA	0.344884	3.98229e-08	1.30891e-06	83	478
C4orf49	-0.644534	3.99768e-08	1.31182e-06	83	468
TM6SF1	-0.639989	4.03011e-08	1.31939e-06	83	478
ZNF490	-0.345066	4.03395e-08	1.31939e-06	83	478
TNNI2	-1.05822	4.07488e-08	1.3306e-06	83	473
SCD5	-1.03898	4.11308e-08	1.34088e-06	83	478
CBLN3	-0.546662	4.12527e-08	1.34151e-06	83	478
TSG101	0.272685	4.12843e-08	1.34151e-06	83	478
ADAM33	-0.94944	4.17655e-08	1.35461e-06	83	478
HAS3	-1.20138	4.1823e-08	1.35461e-06	83	478
AIM1	-1.05338	4.24543e-08	1.37283e-06	83	478
MAF	-0.61005	4.40197e-08	1.42115e-06	83	478
SPN	-0.83916	4.41328e-08	1.4225e-06	83	478
AKNA	-0.506311	4.44206e-08	1.42947e-06	83	478
IKBKB	-0.4641	4.46072e-08	1.43317e-06	83	478
ANPEP	-1.04172	4.48265e-08	1.4379e-06	83	478
SUPV3L1	0.274908	4.51439e-08	1.44576e-06	83	478
ENC1	-0.624619	4.57374e-08	1.46243e-06	83	478
LY86	-0.800062	4.58865e-08	1.46485e-06	83	478
IFLTD1	-0.542463	4.60477e-08	1.46765e-06	83	238
SLC15A3	-0.743553	4.67775e-08	1.48854e-06	83	478
TIAM1	-0.908517	4.73071e-08	1.503e-06	83	478
DOK2	-0.803375	4.75974e-08	1.50982e-06	83	478
PEMT	0.549126	4.77229e-08	1.5114e-06	83	478
TREML1	-0.686533	4.79932e-08	1.51756e-06	83	452
MGLL	-0.684947	4.83552e-08	1.52659e-06	83	478
HSPE1	0.467086	4.86099e-08	1.53221e-06	83	478
ETV1	-0.875413	4.91027e-08	1.54348e-06	83	478
CCL28	-1.30128	4.9158e-08	1.54348e-06	83	477
EPHX1	1.16252	4.91997e-08	1.54348e-06	83	478
MMP2	-0.813659	4.92764e-08	1.54348e-06	83	478
BCCIP	0.33684	4.94305e-08	1.54398e-06	83	478
TTC39C	0.730386	4.94469e-08	1.54398e-06	83	478
NIF3L1	0.311363	4.97262e-08	1.55028e-06	83	478
FOXI2	-0.56276	4.98876e-08	1.55289e-06	83	350
FREM1	-1.2303	5.04908e-08	1.56922e-06	83	477
CES4	1.82107	5.1022e-08	1.58327e-06	83	469
ANKRD13A	-0.384124	5.16089e-08	1.599e-06	83	478
OLFML3	-0.788565	5.24344e-08	1.62206e-06	83	478
DLD	0.361572	5.28207e-08	1.63148e-06	83	478
CD83	-0.7028	5.32549e-08	1.64236e-06	83	478
EVL	-0.542632	5.36571e-08	1.65021e-06	83	478
SNRPE	0.39003	5.36749e-08	1.65021e-06	83	478
FHAD1	-0.99323	5.43576e-08	1.66864e-06	83	478
MXRA8	-0.719538	5.51927e-08	1.69167e-06	83	478
EIF5A	0.46086	5.56445e-08	1.70291e-06	83	478
MRPS5	0.292737	5.65364e-08	1.72756e-06	83	478
CDRT1	1.07973	5.666e-08	1.72869e-06	83	437
NPAS1	0.923431	5.69578e-08	1.73513e-06	83	474
VPS37A	0.467682	5.7237e-08	1.74098e-06	83	478
KIAA1826	-0.453906	5.74053e-08	1.74345e-06	83	478
DCN	-0.689653	5.77915e-08	1.75251e-06	83	478
CCDC89	-0.801308	5.86075e-08	1.77456e-06	83	477
DOPEY1	-0.387676	5.86995e-08	1.77466e-06	83	478
IPCEF1	-0.921268	5.99051e-08	1.80778e-06	83	478
SPIRE2	0.765402	5.9976e-08	1.80778e-06	83	478
CCDC58	0.497313	6.02373e-08	1.81203e-06	83	478
UGT1A9	2.63897	6.02982e-08	1.81203e-06	83	237
TFPI2	-2.05202	6.05031e-08	1.81546e-06	83	478
PDGFC	-0.634516	6.08042e-08	1.82176e-06	83	478
CCDC64	0.877347	6.09765e-08	1.82257e-06	83	478
CASP10	-0.511224	6.10466e-08	1.82257e-06	83	478
IL5RA	-0.916595	6.11778e-08	1.82257e-06	83	449
SPRR2F	-0.753671	6.11962e-08	1.82257e-06	83	244
TIMP2	-0.622554	6.15373e-08	1.83e-06	83	478
DPP4	-1.41685	6.28158e-08	1.86525e-06	83	478
ACHE	-1.32565	6.36619e-08	1.88748e-06	83	478
WDR63	-1.0084	6.37534e-08	1.88748e-06	83	466
PRICKLE2	-0.663586	6.50402e-08	1.92273e-06	83	478
MYOZ1	-1.07698	6.54456e-08	1.93185e-06	83	475
MPDU1	0.464375	6.55716e-08	1.93272e-06	83	478
TEKT2	-1.28416	6.59326e-08	1.9405e-06	83	463
RUNX3	-0.809762	6.63457e-08	1.94978e-06	83	478
ODC1	1.2309	6.65729e-08	1.95359e-06	83	478
CMYA5	-0.859396	6.70314e-08	1.9641e-06	83	478
KIF21A	0.57341	6.71277e-08	1.9641e-06	83	478
CTNNBIP1	-0.420216	6.74485e-08	1.9706e-06	83	478
ESR1	-1.12321	6.92071e-08	2.01903e-06	83	478
GCET2	-0.617464	6.9553e-08	2.02616e-06	83	478
ZNF493	-0.797445	6.98804e-08	2.03274e-06	83	478
MEOX2	-0.858824	7.02653e-08	2.04096e-06	83	478
CIITA	-0.974404	7.06413e-08	2.04614e-06	83	478
BACE1	-0.543492	7.06484e-08	2.04614e-06	83	478
SLFN11	-0.777553	7.08797e-08	2.04987e-06	83	478
RGS11	-0.969595	7.11765e-08	2.05548e-06	83	478
MERTK	-0.633598	7.13327e-08	2.05702e-06	83	478
LOC647121	-0.779703	7.45889e-08	2.14782e-06	83	478
CHSY3	-0.79013	7.51337e-08	2.15802e-06	83	478
ATP5G1	0.53979	7.51593e-08	2.15802e-06	83	478
RSPH4A	-1.17531	7.52922e-08	2.15874e-06	83	476
HIP1	-0.718989	7.59857e-08	2.17361e-06	83	478
ITGA4	-0.696129	7.60284e-08	2.17361e-06	83	478
CLDN16	-0.802106	7.67648e-08	2.19153e-06	83	414
FAM180A	-0.818317	7.69677e-08	2.19418e-06	83	474
NOL7	0.290418	7.84362e-08	2.23255e-06	83	478
FASTKD2	0.258018	7.85609e-08	2.23255e-06	83	478
GNPAT	0.330417	7.86486e-08	2.23255e-06	83	478
SPRED2	-0.457378	7.93058e-08	2.24801e-06	83	478
LRRC18	-0.908906	7.9517e-08	2.2508e-06	83	434
POU6F1	-0.45863	7.99659e-08	2.26031e-06	83	478
CD1E	-1.25928	8.02215e-08	2.26433e-06	83	473
AGXT2L1	1.89992	8.03441e-08	2.26459e-06	83	218
IL16	-0.72031	8.07964e-08	2.27413e-06	83	478
BNC2	-0.741492	8.16513e-08	2.29252e-06	83	478
GGT8P	-0.887072	8.1679e-08	2.29252e-06	83	436
HDDC3	0.50575	8.18935e-08	2.29531e-06	83	478
UBXN8	0.519476	8.21674e-08	2.29977e-06	83	478
FCGR2A	-0.728856	8.33381e-08	2.32927e-06	83	478
GUCY1A3	-0.724208	8.35879e-08	2.33299e-06	83	478
SNRPA1	0.430757	8.43831e-08	2.3519e-06	83	478
ZNF671	-0.664112	8.69011e-08	2.41871e-06	83	478
SLFN12L	-0.853428	8.73002e-08	2.42643e-06	83	478
DCTN6	0.387536	8.81398e-08	2.44637e-06	83	478
PTGER4	-0.774151	8.84148e-08	2.4506e-06	83	478
MICALCL	-0.999339	9.04701e-08	2.50378e-06	83	478
TMEM231	-0.696034	9.05841e-08	2.50378e-06	83	478
MT1E	-1.16862	9.10956e-08	2.51444e-06	83	478
PGR	-0.804969	9.36459e-08	2.58104e-06	83	478
BYSL	0.439785	9.37667e-08	2.58104e-06	83	478
CCDC19	-0.954718	9.40882e-08	2.58633e-06	83	478
CLEC2B	-0.729632	9.45747e-08	2.59613e-06	83	478
RASL11A	-0.677086	9.56486e-08	2.622e-06	83	478
KCTD14	-1.06513	9.65051e-08	2.64186e-06	83	478
DDX26B	-0.635641	9.68254e-08	2.64401e-06	83	478
PHF13	-0.318138	9.68481e-08	2.64401e-06	83	478
KCNJ2	-0.77613	9.70392e-08	2.64561e-06	83	478
ITGAV	-0.554228	9.77815e-08	2.66221e-06	83	478
TMEM90A	-1.12911	9.85672e-08	2.67995e-06	83	463
BHLHE40	-0.621111	9.89133e-08	2.68571e-06	83	478
GAB3	-0.641686	9.90907e-08	2.68688e-06	83	478
FAM126A	-0.693013	9.92777e-08	2.6883e-06	83	478
EIF4A3	0.388634	9.94406e-08	2.68907e-06	83	478
RGMB	-0.436344	9.97588e-08	2.69403e-06	83	478
AMBP	2.36764	1.00024e-07	2.69754e-06	83	453
REN	-0.949109	1.00223e-07	2.69926e-06	83	445
ADIPOR1	0.344995	1.0042e-07	2.70095e-06	83	478
RASAL1	1.02761	1.00589e-07	2.70184e-06	83	476
ADAMTS17	-0.886801	1.0221e-07	2.74169e-06	83	478
YPEL2	-0.356484	1.03292e-07	2.76701e-06	83	478
HERC5	-0.881907	1.04322e-07	2.79015e-06	83	478
KIAA1949	-0.685734	1.04435e-07	2.79015e-06	83	478
PHKG1	-0.645768	1.05245e-07	2.80803e-06	83	463
HTR2B	-0.881313	1.05401e-07	2.80844e-06	83	478
CHODL	1.41771	1.07321e-07	2.8558e-06	83	473
IGSF21	-1.04347	1.08034e-07	2.87095e-06	83	471
DOCK11	-0.757519	1.09701e-07	2.90866e-06	83	478
GLYATL2	-1.10713	1.09744e-07	2.90866e-06	83	342
MAP7D1	-0.404465	1.10531e-07	2.92562e-06	83	478
NT5C	0.503605	1.11255e-07	2.93753e-06	83	478
CARD9	-0.947946	1.11274e-07	2.93753e-06	83	478
ZDHHC15	-1.00805	1.11778e-07	2.94693e-06	83	478
THAP4	0.345796	1.1246e-07	2.96009e-06	83	478
CD180	-0.807304	1.12573e-07	2.96009e-06	83	478
ANKRD34A	-0.868532	1.13192e-07	2.97244e-06	83	477
GPR34	-0.8188	1.14067e-07	2.98811e-06	83	478
SNUPN	0.327833	1.14088e-07	2.98811e-06	83	478
NUDT15	0.44043	1.15821e-07	3.02954e-06	83	478
C15orf60	0.698128	1.16267e-07	3.03722e-06	83	175
HLA-DRB1	-0.994418	1.17459e-07	3.06436e-06	83	478
PSMA3	0.413623	1.18333e-07	3.08287e-06	83	478
TMEM85	0.378701	1.18564e-07	3.08287e-06	83	478
PRAM1	-0.857334	1.1873e-07	3.08287e-06	83	478
FYN	-0.602209	1.18786e-07	3.08287e-06	83	478
ZSWIM6	-0.439351	1.1944e-07	3.09584e-06	83	478
CD33	-0.837026	1.19674e-07	3.09758e-06	83	478
COX5A	0.444457	1.19838e-07	3.09758e-06	83	478
PLXDC1	-0.621963	1.19972e-07	3.09758e-06	83	478
RECK	-0.559895	1.20853e-07	3.11629e-06	83	478
IFI27	-1.11523	1.21641e-07	3.13257e-06	83	478
LPXN	-0.547715	1.23784e-07	3.18366e-06	83	478
NCSTN	0.381864	1.24206e-07	3.19032e-06	83	478
CAMK1	-0.514504	1.24363e-07	3.19032e-06	83	478
HLA-DRA	-0.891929	1.24628e-07	3.19304e-06	83	478
NAALADL1	-0.598225	1.248e-07	3.19335e-06	83	478
MIER1	-0.315863	1.25187e-07	3.19915e-06	83	478
GGT5	-0.696894	1.2545e-07	3.20178e-06	83	478
CSF1R	-0.783976	1.25814e-07	3.20697e-06	83	478
CCDC21	0.4379	1.28739e-07	3.27735e-06	83	478
SLC5A1	-1.8866	1.30683e-07	3.32261e-06	83	456
MT1L	-1.0025	1.31357e-07	3.33551e-06	83	478
PCBP1	0.198296	1.31974e-07	3.34692e-06	83	478
OVOL2	0.609069	1.32836e-07	3.36449e-06	83	477
CD1C	-1.18824	1.35077e-07	3.41694e-06	83	478
NT5E	-1.1407	1.36542e-07	3.44964e-06	83	478
RRAD	-1.16755	1.37166e-07	3.46102e-06	83	478
SPNS3	-0.822906	1.40068e-07	3.52979e-06	83	472
PRDM6	-0.693086	1.41472e-07	3.56069e-06	83	478
CX3CR1	-0.971829	1.42551e-07	3.57864e-06	83	478
C10orf2	0.420469	1.42673e-07	3.57864e-06	83	478
KAL1	-1.00227	1.42824e-07	3.57864e-06	83	478
KCNK13	-0.812245	1.42902e-07	3.57864e-06	83	477
SPRR2D	-1.33834	1.45813e-07	3.64698e-06	83	359
TTC29	-1.09628	1.47675e-07	3.68891e-06	83	364
FAM18B	0.370309	1.48305e-07	3.70002e-06	83	478
PMP22	-0.564563	1.49304e-07	3.72021e-06	83	478
GXYLT2	-0.902873	1.49486e-07	3.72021e-06	83	478
BTN2A2	-0.523269	1.49689e-07	3.72064e-06	83	478
TNFAIP8L2	-0.740794	1.50077e-07	3.72564e-06	83	478
DDX60	-0.771418	1.50381e-07	3.72855e-06	83	478
ROR1	-0.98301	1.52864e-07	3.78542e-06	83	478
ARHGDIB	-0.55083	1.53595e-07	3.79747e-06	83	478
TSSC1	0.384657	1.53731e-07	3.79747e-06	83	478
COL19A1	-0.692035	1.55019e-07	3.82457e-06	83	402
MOSC1	1.10503	1.55533e-07	3.83251e-06	83	478
CCDC90A	0.356671	1.55898e-07	3.83596e-06	83	478
XAF1	-0.771802	1.56057e-07	3.83596e-06	83	478
TTLL9	-0.755056	1.56679e-07	3.84652e-06	83	478
STK10	-0.529217	1.57666e-07	3.866e-06	83	478
PLEKHM1	-0.400723	1.58147e-07	3.87306e-06	83	478
EMP3	-0.6862	1.58619e-07	3.87985e-06	83	478
ASB11	-0.39101	1.60001e-07	3.90889e-06	83	152
CMTM1	-0.587683	1.62596e-07	3.96743e-06	83	478
AGFG1	0.391874	1.64239e-07	4.00261e-06	83	478
TBX19	-0.597913	1.645e-07	4.00411e-06	83	478
P2RY12	-1.0265	1.65615e-07	4.02634e-06	83	469
ENG	-0.545939	1.66178e-07	4.03511e-06	83	478
ELFN2	-1.53643	1.69599e-07	4.11319e-06	83	477
BHLHE22	-0.691413	1.69899e-07	4.11547e-06	83	478
B3GAT1	-1.29773	1.71706e-07	4.15422e-06	83	478
GAL3ST4	-0.659513	1.72106e-07	4.15503e-06	83	478
NRXN2	-0.817691	1.72156e-07	4.15503e-06	83	478
HIST1H4H	0.89637	1.73368e-07	4.17923e-06	83	478
ADC	-0.701045	1.74172e-07	4.19357e-06	83	478
CD4	-0.69967	1.75553e-07	4.22172e-06	83	478
LRRK1	-0.704661	1.76704e-07	4.24428e-06	83	478
ZNF750	-1.49005	1.82714e-07	4.38338e-06	83	478
FOXF2	-0.720472	1.83194e-07	4.38962e-06	83	478
CD80	-0.873976	1.84337e-07	4.41172e-06	83	478
MX1	-0.867075	1.87296e-07	4.47718e-06	83	478
PIK3R5	-0.768693	1.87641e-07	4.48008e-06	83	478
SLC37A2	-0.904759	1.90931e-07	4.55234e-06	83	478
MRVI1	-0.589933	1.91268e-07	4.55234e-06	83	478
SLFN5	-0.627311	1.91351e-07	4.55234e-06	83	478
HIVEP3	-0.668995	1.92162e-07	4.5662e-06	83	478
MAGI3	-0.653822	1.93095e-07	4.58167e-06	83	478
OSCAR	-0.780157	1.93272e-07	4.58167e-06	83	478
COPZ1	0.337495	1.95068e-07	4.61878e-06	83	478
RAB36	-0.766247	1.98222e-07	4.68648e-06	83	478
TCTEX1D1	-0.732078	1.98397e-07	4.68648e-06	83	478
AFAP1L2	-0.747902	1.98847e-07	4.68936e-06	83	478
OMD	-0.991777	1.98988e-07	4.68936e-06	83	477
ZNF563	-0.566977	1.99927e-07	4.70593e-06	83	478
GLIPR2	-0.710078	2.02035e-07	4.74996e-06	83	478
ELAC2	0.265396	2.02538e-07	4.75619e-06	83	478
C1orf126	-0.838133	2.02782e-07	4.75633e-06	83	478
GSTM5	-0.708036	2.03091e-07	4.75801e-06	83	477
KIAA1614	-0.685225	2.03755e-07	4.76796e-06	83	478
TSPAN32	-0.869378	2.04427e-07	4.76961e-06	83	477
USP5	0.331002	2.04478e-07	4.76961e-06	83	478
C1orf186	-0.922819	2.04541e-07	4.76961e-06	83	473
EMR4P	-0.955599	2.06312e-07	4.8049e-06	83	475
EVI2B	-0.727642	2.06614e-07	4.8049e-06	83	478
ODZ4	-0.928725	2.06776e-07	4.8049e-06	83	478
DLG4	-0.593816	2.08234e-07	4.83315e-06	83	478
AQP5	-2.0551	2.09591e-07	4.85664e-06	83	472
ANP32A	0.299311	2.09732e-07	4.85664e-06	83	478
PSMA4	0.351539	2.10644e-07	4.87211e-06	83	478
PSMD7	0.308635	2.11804e-07	4.89329e-06	83	478
C1orf162	-0.696558	2.13232e-07	4.92059e-06	83	478
ARMC4	-1.20929	2.14155e-07	4.93619e-06	83	461
MOBKL2A	-0.376303	2.14876e-07	4.9471e-06	83	478
ZNF431	-0.584427	2.16825e-07	4.98622e-06	83	478
SERPINH1	-0.466726	2.18477e-07	5.01844e-06	83	478
MTSS1L	-0.589841	2.1889e-07	5.02215e-06	83	478
CYS1	-0.947871	2.19953e-07	5.04075e-06	83	478
SLC4A7	-0.586549	2.20713e-07	5.05036e-06	83	478
STRA13	0.575045	2.21103e-07	5.05036e-06	83	478
TYK2	-0.335454	2.21258e-07	5.05036e-06	83	478
SDC3	-0.51357	2.21383e-07	5.05036e-06	83	478
MYO9B	-0.398103	2.24623e-07	5.11843e-06	83	478
DEF6	-0.461394	2.26498e-07	5.15527e-06	83	478
DOCK9	-0.555275	2.27026e-07	5.16141e-06	83	478
BICC1	-1.05405	2.28219e-07	5.1809e-06	83	478
MUM1	-0.341062	2.28401e-07	5.1809e-06	83	478
DOCK2	-0.814174	2.29866e-07	5.20804e-06	83	478
SDC2	-0.65511	2.30119e-07	5.20804e-06	83	478
B3GNT7	-1.09911	2.31094e-07	5.22419e-06	83	478
HSPD1	0.441889	2.31445e-07	5.22621e-06	83	478
ZNF557	-0.350164	2.35083e-07	5.30238e-06	83	478
LOC729082	0.393344	2.3557e-07	5.30736e-06	83	478
UBTD2	-0.263754	2.36671e-07	5.32616e-06	83	478
TBC1D9	-0.450248	2.41756e-07	5.42373e-06	83	478
IFIT1	-1.00933	2.41855e-07	5.42373e-06	83	478
NXN	-0.636671	2.4208e-07	5.42373e-06	83	478
TLR7	-0.860946	2.42092e-07	5.42373e-06	83	478
C6orf176	2.42149	2.44858e-07	5.47956e-06	83	333
FAM84B	-0.562978	2.48032e-07	5.54437e-06	83	478
ENTPD1	-0.376893	2.49214e-07	5.56009e-06	83	478
EVI5L	-0.43167	2.49291e-07	5.56009e-06	83	478
PFKFB3	-0.669079	2.49615e-07	5.56109e-06	83	478
EBPL	0.638919	2.50634e-07	5.57757e-06	83	478
ARL10	-0.766089	2.50977e-07	5.57901e-06	83	477
BAAT	-1.39893	2.55173e-07	5.66598e-06	83	472
LTBP1	-0.688144	2.58429e-07	5.73174e-06	83	478
DAP3	0.325555	2.58709e-07	5.73174e-06	83	478
MEGF9	0.784128	2.60668e-07	5.76876e-06	83	478
PLEKHA4	-0.673586	2.63744e-07	5.83038e-06	83	478
SLC25A11	0.322615	2.64552e-07	5.84178e-06	83	478
KBTBD8	-0.704127	2.66013e-07	5.86755e-06	83	478
TPK1	-0.675111	2.69089e-07	5.92887e-06	83	478
ZFPM2	-0.660706	2.70684e-07	5.95743e-06	83	478
FNDC5	-0.955735	2.71736e-07	5.974e-06	83	478
WAS	-0.691888	2.74967e-07	6.0384e-06	83	478
MYL9	-0.5578	2.76382e-07	6.0628e-06	83	478
PLEKHO2	-0.49414	2.76994e-07	6.06958e-06	83	478
FAM105B	-0.348532	2.79604e-07	6.12004e-06	83	478
CLSTN1	-0.412458	2.80714e-07	6.13763e-06	83	478
LRRC17	-0.67645	2.82597e-07	6.17205e-06	83	478
SEMA3A	-1.30187	2.84403e-07	6.2047e-06	83	478
TECTA	-0.69641	2.86564e-07	6.24504e-06	83	476
MYO6	-0.493209	2.86917e-07	6.24591e-06	83	478
TNMD	-0.461244	2.87452e-07	6.25076e-06	83	198
LTBP2	-0.707261	2.88639e-07	6.26973e-06	83	478
FAM76A	-0.346834	2.91684e-07	6.329e-06	83	478
ZNF197	-0.365438	2.93088e-07	6.35256e-06	83	478
FRAT2	0.477032	2.99398e-07	6.4823e-06	83	478
INHA	2.34329	3.01291e-07	6.51475e-06	83	457
GAS2L2	-1.18478	3.01549e-07	6.51475e-06	83	459
PTPRZ1	-1.80712	3.03001e-07	6.53906e-06	83	468
SLC7A2	1.6649	3.08146e-07	6.64292e-06	83	478
NBPF14	-0.635962	3.09133e-07	6.65702e-06	83	478
TRAFD1	-0.325883	3.10914e-07	6.68817e-06	83	478
CYTH4	-0.705983	3.14964e-07	6.76799e-06	83	478
TRIM14	-0.451277	3.17193e-07	6.80858e-06	83	478
ILF2	0.313014	3.17798e-07	6.81424e-06	83	478
SH2B3	-0.520243	3.19089e-07	6.8346e-06	83	478
IL13RA1	-0.361416	3.20772e-07	6.86329e-06	83	478
MFGE8	-0.522994	3.23768e-07	6.91999e-06	83	478
UNC5C	-0.816689	3.25348e-07	6.94633e-06	83	475
CSTF2T	0.291656	3.29432e-07	7.026e-06	83	478
CHMP1B	0.477454	3.3068e-07	7.04511e-06	83	478
GLA	0.546131	3.34927e-07	7.12799e-06	83	478
TTLL11	-0.531432	3.35589e-07	7.13293e-06	83	478
PAMR1	-0.856329	3.35873e-07	7.13293e-06	83	478
PGA3	-0.781808	3.36704e-07	7.14299e-06	83	342
VWA3A	-1.05859	3.39824e-07	7.20154e-06	83	433
FAM36A	0.429684	3.40848e-07	7.21559e-06	83	478
GARNL3	-0.690745	3.41643e-07	7.22476e-06	83	478
CREB3L4	0.50111	3.46877e-07	7.32768e-06	83	478
FUT7	-0.813358	3.50676e-07	7.40012e-06	83	478
ASPHD2	-0.764895	3.52639e-07	7.4337e-06	83	478
RASGEF1B	-0.536649	3.53666e-07	7.44749e-06	83	478
EVI5	-0.313615	3.54681e-07	7.461e-06	83	478
MEGF11	-1.09494	3.5656e-07	7.49194e-06	83	461
SIGLEC9	-0.824384	3.56902e-07	7.49194e-06	83	478
ZNF486	-1.218	3.60299e-07	7.55531e-06	83	477
2019-09-06	-0.470136	3.61063e-07	7.56341e-06	83	478
SDCBP2	1.19645	3.64941e-07	7.63664e-06	83	478
CCDC81	-0.718931	3.6558e-07	7.64199e-06	83	475
PHYHD1	-1.26999	3.66689e-07	7.65717e-06	83	478
IFFO1	-0.575104	3.70448e-07	7.72758e-06	83	478
GLRX2	0.420011	3.71262e-07	7.73556e-06	83	478
FARSB	0.324408	3.71604e-07	7.73556e-06	83	478
HMBS	0.419969	3.7476e-07	7.79313e-06	83	478
UGT1A1	1.74663	3.7598e-07	7.81038e-06	83	196
KDR	-0.782878	3.79954e-07	7.87992e-06	83	478
C12orf63	-0.762719	3.80116e-07	7.87992e-06	83	453
PER3	-0.950233	3.81789e-07	7.9064e-06	83	478
MRPL30	0.300865	3.83424e-07	7.93203e-06	83	478
DCP2	-0.356014	3.85536e-07	7.96749e-06	83	478
SORBS1	-0.67959	3.86959e-07	7.98862e-06	83	478
SNX20	-0.747992	3.88712e-07	8.01653e-06	83	478
ZNF266	-0.47978	3.91941e-07	8.07479e-06	83	478
ZNF100	-0.604383	3.9275e-07	8.08312e-06	83	478
SASH3	-0.71608	3.94577e-07	8.11237e-06	83	478
GDF5	-1.09358	3.97684e-07	8.16786e-06	83	470
SPTB	-1.42562	4.00579e-07	8.21886e-06	83	478
EHBP1	0.384052	4.101e-07	8.40557e-06	83	478
S100B	-1.09022	4.12787e-07	8.45198e-06	83	478
FGF12	1.49406	4.18397e-07	8.55808e-06	83	476
DDX59	0.305312	4.20728e-07	8.59696e-06	83	478
C7orf58	-0.790584	4.22852e-07	8.63153e-06	83	478
GNG2	-0.538275	4.24593e-07	8.65824e-06	83	478
ZNF354C	-0.932537	4.26357e-07	8.68533e-06	83	476
ANKRD58	-0.743523	4.321e-07	8.79336e-06	83	477
SIDT1	-0.935758	4.32753e-07	8.7977e-06	83	478
KIAA1432	-0.425123	4.35971e-07	8.85412e-06	83	478
LGI1	-0.355458	4.39432e-07	8.91535e-06	83	129
TNIK	-0.939471	4.41496e-07	8.94813e-06	83	478
RNF24	0.505814	4.42485e-07	8.95909e-06	83	478
XKRX	-1.29605	4.44015e-07	8.98097e-06	83	478
SLC2A9	-0.685166	4.45668e-07	9.0053e-06	83	478
PTGR2	0.385572	4.46493e-07	9.01284e-06	83	478
HABP2	-1.73362	4.47397e-07	9.02198e-06	83	473
PARVG	-0.730781	4.5367e-07	9.13925e-06	83	478
ZNF85	-0.681717	4.5661e-07	9.18922e-06	83	478
CHST5	-0.733167	4.58395e-07	9.21586e-06	83	451
SLC9A6	-0.326781	4.67751e-07	9.3945e-06	83	478
CILP2	-1.00728	4.68448e-07	9.39906e-06	83	478
MRGPRF	-0.694592	4.73936e-07	9.49964e-06	83	478
DNAJB3	0.997568	4.74985e-07	9.50562e-06	83	146
ZGLP1	-0.746736	4.75186e-07	9.50562e-06	83	478
SDC1	-0.598022	4.76769e-07	9.52774e-06	83	478
TYSND1	0.420501	4.78675e-07	9.55317e-06	83	478
ADAP2	-0.486566	4.79043e-07	9.55317e-06	83	478
PFDN2	0.387629	4.79475e-07	9.55317e-06	83	478
SPRYD4	0.399273	4.80229e-07	9.55867e-06	83	478
CLEC4A	-0.79646	4.83901e-07	9.62217e-06	83	478
KIF7	-0.691719	4.88096e-07	9.69594e-06	83	478
CD82	-0.60803	4.90629e-07	9.73657e-06	83	478
GLT8D2	-0.677499	4.91121e-07	9.73668e-06	83	478
NBL1	-0.658707	4.9884e-07	9.87991e-06	83	478
CTDSP2	-0.343664	5.00764e-07	9.90819e-06	83	478
BAG1	0.522097	5.0374e-07	9.9572e-06	83	478
VENTX	-0.740335	5.06688e-07	1.00056e-05	83	478
FOXP3	-0.753754	5.08234e-07	1.00262e-05	83	478
TAGAP	-0.737335	5.1151e-07	1.00809e-05	83	478
DERL2	0.349069	5.15409e-07	1.01477e-05	83	478
CLDN1	-1.02947	5.17266e-07	1.01743e-05	83	478
LPAR1	0.77418	5.19949e-07	1.0217e-05	83	478
ANTXR2	-0.585616	5.21027e-07	1.02281e-05	83	478
AP1S1	0.436404	5.22894e-07	1.02526e-05	83	478
UBE2Q1	0.238981	5.23301e-07	1.02526e-05	83	478
STK39	-0.584714	5.26025e-07	1.02959e-05	83	478
FCER1A	-1.32127	5.29573e-07	1.03552e-05	83	475
SCARF2	-0.639593	5.37324e-07	1.04827e-05	83	478
SYNPO2	-0.657697	5.37331e-07	1.04827e-05	83	478
EPN3	0.740703	5.3767e-07	1.04827e-05	83	476
STAT5A	-0.438683	5.38752e-07	1.04936e-05	83	478
SPRR2C	-0.733639	5.41325e-07	1.05334e-05	83	196
CCM2	-0.371861	5.42766e-07	1.05512e-05	83	478
ARHGAP30	-0.611504	5.44078e-07	1.05626e-05	83	478
MMP11	-1.04725	5.45081e-07	1.05626e-05	83	478
COL6A3	-0.734884	5.4528e-07	1.05626e-05	83	478
EPB41L2	-0.615157	5.45466e-07	1.05626e-05	83	478
SCUBE3	-1.17488	5.46487e-07	1.05721e-05	83	477
APOBEC2	-0.820581	5.49349e-07	1.06172e-05	83	466
C7orf10	-0.87769	5.51769e-07	1.06537e-05	83	478
OTUD3	-0.636091	5.53973e-07	1.06859e-05	83	478
ZNF93	-0.715507	5.54704e-07	1.06897e-05	83	478
NDUFB8	0.404067	5.63742e-07	1.08534e-05	83	478
DYNC2H1	-0.721011	5.65703e-07	1.08796e-05	83	478
MAP3K5	-0.531499	5.66473e-07	1.08796e-05	83	478
C3AR1	-0.778776	5.66738e-07	1.08796e-05	83	478
DRGX	-0.818247	5.75219e-07	1.10318e-05	83	249
SLC39A13	-0.386744	5.75999e-07	1.10345e-05	83	478
HLA-DMA	-0.717436	5.76462e-07	1.10345e-05	83	478
CHRNA6	-0.575789	5.82624e-07	1.11333e-05	83	440
CDC14A	-0.594925	5.82736e-07	1.11333e-05	83	478
DUSP4	1.12446	5.9802e-07	1.14144e-05	83	478
C21orf125	1.41721	5.98713e-07	1.14167e-05	83	461
AGRP	-0.701241	6.03432e-07	1.14957e-05	83	416
SSBP2	-0.614537	6.09615e-07	1.16024e-05	83	478
CHRNA5	1.13214	6.12539e-07	1.1647e-05	83	478
EREG	-1.80766	6.19427e-07	1.17668e-05	83	475
MACC1	-0.807638	6.21895e-07	1.18024e-05	83	478
TGFB3	-0.537052	6.23497e-07	1.18216e-05	83	478
CILP	-1.29909	6.2607e-07	1.18591e-05	83	478
SMAP2	-0.375748	6.27125e-07	1.18679e-05	83	478
MGRN1	-0.39925	6.43756e-07	1.21711e-05	83	478
LRIG2	-0.357663	6.44658e-07	1.21766e-05	83	478
PLAU	-1.11972	6.5278e-07	1.23184e-05	83	478
CCDC74A	-0.707515	6.54526e-07	1.23397e-05	83	478
PLS3	-0.530295	6.56412e-07	1.23636e-05	83	478
INPP5J	-0.94326	6.66731e-07	1.25461e-05	83	478
NETO1	-1.04604	6.7219e-07	1.26369e-05	83	436
MLLT4	-0.402392	6.7422e-07	1.26632e-05	83	478
LOC100125556	0.529522	6.7815e-07	1.2725e-05	83	478
ZNF474	-0.692641	6.79948e-07	1.27468e-05	83	474
TMEM200A	-0.697867	6.82564e-07	1.27838e-05	83	478
RYR1	-1.31962	6.84074e-07	1.28001e-05	83	478
CLECL1	-0.799024	6.96854e-07	1.30271e-05	83	475
RAPGEF5	-0.586719	7.01055e-07	1.30933e-05	83	478
SNX25	-0.583694	7.06028e-07	1.31739e-05	83	478
RASD1	1.34588	7.0872e-07	1.32034e-05	83	478
STK11	-0.595529	7.08931e-07	1.32034e-05	83	478
CLIP2	-0.66667	7.14456e-07	1.32939e-05	83	478
RNMTL1	0.36395	7.16139e-07	1.33129e-05	83	478
APP	-0.463354	7.18787e-07	1.33474e-05	83	478
FLJ10357	-0.527726	7.19335e-07	1.33474e-05	83	478
BPNT1	0.360653	7.20024e-07	1.33478e-05	83	478
ZFP37	-0.814377	7.22364e-07	1.33788e-05	83	478
HAX1	0.384277	7.23483e-07	1.33871e-05	83	478
MED9	0.299562	7.24277e-07	1.33894e-05	83	478
ZCCHC24	-0.421729	7.33448e-07	1.35464e-05	83	478
FBXL12	-0.252104	7.3565e-07	1.35745e-05	83	478
DDC	2.14826	7.41762e-07	1.36747e-05	83	458
BASP1	0.922899	7.43568e-07	1.36954e-05	83	478
ZNF506	-0.527324	7.50311e-07	1.37943e-05	83	478
LYL1	-0.579857	7.50319e-07	1.37943e-05	83	478
STXBP5L	1.7184	7.54403e-07	1.38566e-05	83	289
NDUFA8	0.343283	7.5541e-07	1.38624e-05	83	478
CEACAM4	-0.905756	7.59903e-07	1.3932e-05	83	471
POPDC2	-0.488594	7.68243e-07	1.40659e-05	83	478
PLXNC1	-1.04495	7.68615e-07	1.40659e-05	83	478
ZNF846	-0.448442	7.69473e-07	1.40688e-05	83	478
C1orf97	0.580697	7.70391e-07	1.40727e-05	83	478
BLVRB	0.711625	7.74919e-07	1.41424e-05	83	478
KIAA1529	-0.800165	7.76456e-07	1.41576e-05	83	478
TM7SF4	-0.951742	7.8034e-07	1.42154e-05	83	475
UBE2G1	0.251531	7.84997e-07	1.42872e-05	83	478
LRRC25	-0.764065	7.91262e-07	1.43881e-05	83	478
TP53I3	0.566348	7.92343e-07	1.43915e-05	83	478
MMADHC	0.317731	7.92887e-07	1.43915e-05	83	478
ZNF615	-0.43636	7.94021e-07	1.4399e-05	83	478
PLAC8	-1.12078	7.98278e-07	1.44595e-05	83	478
C10orf35	0.405761	7.99076e-07	1.44595e-05	83	478
COL14A1	-0.872837	8.00299e-07	1.44595e-05	83	478
C6orf124	-0.667247	8.00484e-07	1.44595e-05	83	478
COX4NB	0.292182	8.00974e-07	1.44595e-05	83	478
LOC400794	-0.929767	8.02787e-07	1.44791e-05	83	380
PEA15	-0.320933	8.10301e-07	1.46015e-05	83	478
S100A5	-0.969954	8.18278e-07	1.47199e-05	83	417
FAM74A1	-0.107789	8.18346e-07	1.47199e-05	83	60
C10orf72	-0.722915	8.31001e-07	1.49341e-05	83	478
GLIPR1	-0.65242	8.32594e-07	1.49371e-05	83	478
HLA-DQA1	-1.02515	8.32662e-07	1.49371e-05	83	478
MSRB3	-0.581724	8.35076e-07	1.4967e-05	83	478
PDHX	0.302402	8.38977e-07	1.50234e-05	83	478
HIST1H2BN	0.676135	8.40267e-07	1.5033e-05	83	477
C11orf21	-0.813291	8.45041e-07	1.51049e-05	83	476
LHFPL2	-0.621995	8.50066e-07	1.51812e-05	83	478
MS4A7	-0.747676	8.51344e-07	1.51904e-05	83	478
NALCN	-0.83656	8.59781e-07	1.53273e-05	83	477
SLC22A17	-0.807932	8.63766e-07	1.53846e-05	83	478
GPATCH4	0.366175	8.68041e-07	1.54458e-05	83	478
ZFP2	-0.71411	8.68749e-07	1.54458e-05	83	478
ATP5G2	0.418832	8.77855e-07	1.55938e-05	83	478
ABCA6	-0.817826	8.83862e-07	1.56685e-05	83	478
KIRREL	-0.939706	8.84254e-07	1.56685e-05	83	478
SHMT1	0.518805	8.84411e-07	1.56685e-05	83	478
MARS2	0.370096	8.85804e-07	1.56793e-05	83	478
PIGR	-1.69879	8.91007e-07	1.57574e-05	83	478
IFI16	-0.719799	9.00295e-07	1.59076e-05	83	478
KIAA0748	-0.849443	9.026e-07	1.59342e-05	83	476
SVEP1	-0.81999	9.04367e-07	1.59513e-05	83	478
HLA-DQB1	-0.991183	9.10769e-07	1.60501e-05	83	478
IL10RA	-0.684559	9.19468e-07	1.61891e-05	83	478
LST1	-0.760143	9.24964e-07	1.62715e-05	83	478
CD300LF	-0.766657	9.29445e-07	1.6336e-05	83	478
RIN2	-0.322467	9.34378e-07	1.64083e-05	83	478
MAP3K13	-0.727298	9.41669e-07	1.6515e-05	83	478
ARHGAP9	-0.731379	9.4211e-07	1.6515e-05	83	478
MS4A14	-0.791516	9.46143e-07	1.65712e-05	83	478
GADD45A	-0.683038	9.4781e-07	1.65858e-05	83	478
CD53	-0.714574	9.5286e-07	1.66518e-05	83	478
TSR1	0.277771	9.53247e-07	1.66518e-05	83	478
FAP	-0.872188	9.57515e-07	1.67118e-05	83	478
TMEM51	-0.505836	9.658e-07	1.68417e-05	83	478
LGALS12	-0.898108	9.68623e-07	1.68762e-05	83	450
IFIT2	-0.629577	9.72724e-07	1.69278e-05	83	478
PLEKHM1P	-0.461393	9.73281e-07	1.69278e-05	83	478
AP1S2	-0.556497	9.75277e-07	1.69304e-05	83	478
MAPKBP1	-0.39	9.75861e-07	1.69304e-05	83	478
IGSF6	-0.817927	9.75969e-07	1.69304e-05	83	478
FGR	-0.687944	9.77036e-07	1.69342e-05	83	478
LAPTM5	-0.701872	9.84354e-07	1.70399e-05	83	478
SUN1	-0.342221	9.84842e-07	1.70399e-05	83	478
NOD2	-0.583842	9.88618e-07	1.70904e-05	83	478
NLRP3	-0.771995	9.92391e-07	1.71408e-05	83	478
ZFP90	-0.329509	9.97818e-07	1.72197e-05	83	478
VASN	-0.760403	1.00535e-06	1.73347e-05	83	478
ZNF682	-0.93812	1.00817e-06	1.73645e-05	83	478
CNO	0.404993	1.00882e-06	1.73645e-05	83	478
ANKRD44	-0.810033	1.01004e-06	1.73706e-05	83	478
C10orf53	-0.173951	1.01553e-06	1.74501e-05	83	87
NCKAP1L	-0.805227	1.02337e-06	1.75696e-05	83	478
CDK15	-0.521457	1.02593e-06	1.75985e-05	83	388
PIP4K2A	-0.468683	1.02746e-06	1.76095e-05	83	478
GALNT6	-1.02002	1.03043e-06	1.7632e-05	83	478
ANKRD50	-0.437422	1.03054e-06	1.7632e-05	83	478
WDR47	-0.380603	1.0328e-06	1.76556e-05	83	478
LYSMD1	0.400113	1.04223e-06	1.78016e-05	83	478
RPP40	0.495105	1.04802e-06	1.78853e-05	83	478
OTUD7A	0.868954	1.04958e-06	1.78966e-05	83	461
SPAG8	-0.758892	1.05064e-06	1.78995e-05	83	475
RNASE7	-0.665841	1.06098e-06	1.80499e-05	83	288
MEX3D	-0.438953	1.06128e-06	1.80499e-05	83	478
NEURL1B	-0.757032	1.07263e-06	1.82174e-05	83	478
VSTM2L	-1.35914	1.07295e-06	1.82174e-05	83	478
DLX3	-1.25739	1.07718e-06	1.82501e-05	83	468
HIST1H2BC	0.906053	1.07753e-06	1.82501e-05	83	478
GGTA1	-0.706117	1.07792e-06	1.82501e-05	83	478
PRRT2	-0.792304	1.07853e-06	1.82501e-05	83	478
RAB34	-0.468663	1.08015e-06	1.8255e-05	83	478
ZNF391	-0.92256	1.08065e-06	1.8255e-05	83	477
ACRC	-0.748882	1.08462e-06	1.83067e-05	83	478
C21orf96	-0.428864	1.0875e-06	1.83199e-05	83	329
SIGLEC1	-0.893816	1.08808e-06	1.83199e-05	83	478
TMEM8C	-0.197311	1.08816e-06	1.83199e-05	83	117
SLC28A3	-1.12839	1.08953e-06	1.83277e-05	83	466
CLCA2	-1.00408	1.09246e-06	1.8339e-05	83	455
C4orf52	0.374799	1.09258e-06	1.8339e-05	83	478
WDR82	-0.244126	1.09296e-06	1.8339e-05	83	478
ZNF608	-0.7013	1.09469e-06	1.83525e-05	83	478
P2RX7	-0.952874	1.09653e-06	1.83681e-05	83	478
SCAMP3	0.294956	1.09965e-06	1.84048e-05	83	478
SNAPC5	0.293107	1.10204e-06	1.84294e-05	83	478
PPP1R1B	-1.76281	1.10735e-06	1.84874e-05	83	476
PNMAL1	-1.26128	1.10802e-06	1.84874e-05	83	478
DLEU1	0.537784	1.10828e-06	1.84874e-05	83	478
ATP5B	0.37952	1.11178e-06	1.85303e-05	83	478
INTS7	0.33566	1.11578e-06	1.85815e-05	83	478
BTBD19	-0.757482	1.11877e-06	1.86158e-05	83	476
SPRR1B	-1.52756	1.12208e-06	1.86553e-05	83	377
LUM	-0.616041	1.12672e-06	1.87168e-05	83	478
FAM189A2	-1.1368	1.13733e-06	1.88774e-05	83	478
BST2	-0.768711	1.13856e-06	1.88821e-05	83	478
CASR	-1.05588	1.14289e-06	1.89382e-05	83	352
COPZ2	-0.589551	1.14464e-06	1.89515e-05	83	478
C19orf59	-1.24627	1.15341e-06	1.90809e-05	83	477
GOT2	0.325941	1.15502e-06	1.90918e-05	83	478
DLG2	-0.780704	1.15698e-06	1.91084e-05	83	478
FAT2	-1.20948	1.1692e-06	1.92943e-05	83	475
GTF2A2	0.395779	1.17479e-06	1.93595e-05	83	478
KLF10	-0.412757	1.17592e-06	1.93595e-05	83	478
ADPRHL1	0.961091	1.17606e-06	1.93595e-05	83	478
ZNF491	-0.564295	1.1869e-06	1.95218e-05	83	477
C21orf57	0.536404	1.19041e-06	1.95538e-05	83	478
PMF1	0.418891	1.1908e-06	1.95538e-05	83	478
APOBEC3C	-0.73337	1.19307e-06	1.95749e-05	83	478
RUVBL1	0.350792	1.20077e-06	1.96738e-05	83	478
TACC2	0.848737	1.20106e-06	1.96738e-05	83	478
DEDD	0.203576	1.20215e-06	1.96756e-05	83	478
ZNF12	-0.277149	1.20543e-06	1.97129e-05	83	478
TLK1	0.259757	1.21016e-06	1.97742e-05	83	478
NUP88	0.320019	1.21447e-06	1.98284e-05	83	478
BTN2A3	-0.535763	1.21619e-06	1.98369e-05	83	478
DZIP1L	-0.734552	1.21698e-06	1.98369e-05	83	478
KAT2B	-0.454819	1.22299e-06	1.99188e-05	83	478
C6orf103	-0.82857	1.23493e-06	2.00968e-05	83	353
BEAN	-1.05976	1.24143e-06	2.01862e-05	83	478
HMOX2	-0.291587	1.25088e-06	2.03233e-05	83	478
DPY19L2P2	-0.874255	1.25604e-06	2.03905e-05	83	478
NDUFAF4	0.41307	1.26777e-06	2.05643e-05	83	478
FAIM2	-1.13883	1.27986e-06	2.07435e-05	83	477
RASSF2	-0.618702	1.28323e-06	2.07813e-05	83	478
MALT1	-0.356643	1.28627e-06	2.08137e-05	83	478
IKZF1	-0.702666	1.2877e-06	2.08198e-05	83	478
IFNGR2	-0.391218	1.28933e-06	2.08293e-05	83	478
C20orf30	0.318342	1.29124e-06	2.08434e-05	83	478
SPAG17	-1.1709	1.29745e-06	2.0913e-05	83	472
GPR120	-0.980898	1.29764e-06	2.0913e-05	83	467
NAGA	-0.275749	1.30511e-06	2.10164e-05	83	478
PIGP	0.427546	1.30709e-06	2.10314e-05	83	478
EYS	1.20799	1.32009e-06	2.12234e-05	83	478
CCDC114	-0.835902	1.32655e-06	2.13101e-05	83	477
OPRL1	-0.598539	1.33413e-06	2.14147e-05	83	478
PPM1M	-0.403071	1.34407e-06	2.15569e-05	83	478
TFB2M	0.367096	1.35571e-06	2.17262e-05	83	478
C1orf158	-0.930177	1.35939e-06	2.17597e-05	83	341
EIF4A1	0.300014	1.35998e-06	2.17597e-05	83	478
TNFAIP8	-0.661308	1.36551e-06	2.18307e-05	83	478
2019-12-01	-0.138743	1.36933e-06	2.18743e-05	83	100
FOXJ1	-1.31116	1.37068e-06	2.18783e-05	83	478
AKR1C4	1.83996	1.3718e-06	2.18788e-05	83	228
CSF2	-1.00451	1.37762e-06	2.19541e-05	83	466
GPR183	-0.757825	1.38724e-06	2.20794e-05	83	478
DNAH2	-1.16136	1.3877e-06	2.20794e-05	83	478
SLC4A4	-1.14036	1.39153e-06	2.21228e-05	83	478
GTF2F2	0.306398	1.3961e-06	2.21778e-05	83	478
LSAMP	-0.701433	1.41413e-06	2.24464e-05	83	478
LDLRAD1	1.21382	1.41636e-06	2.24531e-05	83	431
TTC18	-0.876479	1.4168e-06	2.24531e-05	83	478
MLLT1	-0.342873	1.41985e-06	2.24813e-05	83	478
ENKUR	-0.956411	1.42187e-06	2.24813e-05	83	473
OR5K2	-0.295955	1.42195e-06	2.24813e-05	83	263
PIK3R1	-0.476924	1.43511e-06	2.26714e-05	83	478
MID2	-0.501583	1.4374e-06	2.26895e-05	83	478
USP4	-0.288884	1.44719e-06	2.2826e-05	83	478
HLA-DRB5	-1.07862	1.4522e-06	2.28871e-05	83	478
SSC5D	-0.766228	1.46102e-06	2.30079e-05	83	478
IRF9	-0.416382	1.47879e-06	2.32694e-05	83	478
SPATS2	0.407035	1.47998e-06	2.32697e-05	83	478
C4orf47	-0.795323	1.48218e-06	2.32861e-05	83	473
EMP1	-0.636474	1.48382e-06	2.32935e-05	83	478
TAT	1.03639	1.50052e-06	2.35372e-05	83	458
HDX	-0.72185	1.51041e-06	2.36737e-05	83	478
PRRX1	-0.649374	1.51205e-06	2.36808e-05	83	478
AP4B1	-0.350188	1.52008e-06	2.37879e-05	83	478
LRRC8E	-0.410071	1.53131e-06	2.39451e-05	83	478
CD200R1	-0.731756	1.53275e-06	2.39488e-05	83	478
CD86	-0.741814	1.53987e-06	2.40413e-05	83	478
LAIR1	-0.748235	1.55229e-06	2.42162e-05	83	478
ELL	-0.277503	1.55812e-06	2.42882e-05	83	478
EHD1	-0.416843	1.57359e-06	2.45102e-05	83	478
C20orf103	-0.902539	1.58058e-06	2.4582e-05	83	478
ARHGAP18	-0.483574	1.58153e-06	2.4582e-05	83	478
MOXD1	-0.678002	1.58189e-06	2.4582e-05	83	478
CD300C	-0.82006	1.58865e-06	2.46678e-05	83	478
GADL1	-0.454897	1.59619e-06	2.47657e-05	83	285
AQP2	-0.787888	1.60402e-06	2.48679e-05	83	340
MRPL42	0.370807	1.61018e-06	2.49441e-05	83	478
C2CD4D	0.912333	1.62317e-06	2.51258e-05	83	475
GALNTL1	-0.945631	1.64379e-06	2.54253e-05	83	477
ROS1	-1.39754	1.65409e-06	2.55512e-05	83	478
SCD	0.621401	1.65449e-06	2.55512e-05	83	478
CALHM2	-0.470539	1.66225e-06	2.56513e-05	83	478
GRIN2A	-1.11844	1.66399e-06	2.56582e-05	83	439
PIPSL	0.333669	1.671e-06	2.57405e-05	83	478
FRMD6	-0.743197	1.6719e-06	2.57405e-05	83	478
USP10	0.242987	1.68023e-06	2.58489e-05	83	478
COL6A2	-0.692481	1.68212e-06	2.58581e-05	83	478
TRIM37	0.355342	1.68454e-06	2.58754e-05	83	478
KLHL6	-0.746915	1.6868e-06	2.58902e-05	83	478
C4A	-0.804601	1.692e-06	2.595e-05	83	478
FLJ13197	-0.791375	1.69865e-06	2.60147e-05	83	476
USMG5	0.453585	1.69882e-06	2.60147e-05	83	478
ECHS1	0.371109	1.71059e-06	2.61749e-05	83	478
ZNF107	-0.495342	1.71493e-06	2.62043e-05	83	478
NEXN	-0.600859	1.7164e-06	2.62043e-05	83	478
DHTKD1	0.390758	1.71644e-06	2.62043e-05	83	478
MANBA	-0.392346	1.72522e-06	2.63182e-05	83	478
NAP1L3	-0.568137	1.73087e-06	2.63698e-05	83	478
MRC1	-0.974919	1.73124e-06	2.63698e-05	83	478
AIF1	-0.675943	1.73594e-06	2.64211e-05	83	478
GABARAPL1	0.514331	1.74665e-06	2.6564e-05	83	478
PADI2	-0.920246	1.77338e-06	2.695e-05	83	478
RAB37	-0.831661	1.77547e-06	2.69613e-05	83	478
BIN2	-0.644764	1.78218e-06	2.70426e-05	83	478
WDR65	-0.872021	1.7883e-06	2.71149e-05	83	455
SOX1	-0.592044	1.79057e-06	2.71287e-05	83	144
LOC100233209	-0.757886	1.79321e-06	2.71481e-05	83	477
EGLN1	0.458075	1.80484e-06	2.73036e-05	83	478
RIPK4	-0.549096	1.80706e-06	2.73164e-05	83	478
OVCA2	0.370147	1.80937e-06	2.73306e-05	83	478
PIK3CG	-0.827482	1.81376e-06	2.73763e-05	83	478
CREG1	0.507095	1.83092e-06	2.76018e-05	83	478
CSRP3	-0.243596	1.83146e-06	2.76018e-05	83	103
KCNE3	0.699078	1.83829e-06	2.76725e-05	83	478
ZNF555	-0.368849	1.83892e-06	2.76725e-05	83	478
SLC35D1	-0.371614	1.84105e-06	2.76836e-05	83	478
ZBP1	-0.875087	1.8442e-06	2.77102e-05	83	478
MRPS9	0.276065	1.8487e-06	2.77569e-05	83	478
ACTR6	0.35735	1.85557e-06	2.78391e-05	83	478
MMP13	-1.67453	1.8685e-06	2.80122e-05	83	475
GPI	0.414507	1.86993e-06	2.80125e-05	83	478
TXNIP	-0.559704	1.8928e-06	2.83338e-05	83	478
LCP2	-0.635291	1.89567e-06	2.83555e-05	83	478
ZNF167	-0.634412	1.91823e-06	2.86715e-05	83	478
FERMT3	-0.665969	1.93525e-06	2.89044e-05	83	478
TMEM130	-1.05915	1.9369e-06	2.89074e-05	83	476
FBXL7	-0.499127	1.93942e-06	2.89235e-05	83	478
C1orf129	-0.718981	1.94877e-06	2.90411e-05	83	322
MFAP4	-0.798382	1.97084e-06	2.93401e-05	83	478
EVC	-0.495182	1.97216e-06	2.93401e-05	83	478
SRGAP3	-0.635714	1.97406e-06	2.93401e-05	83	478
ADAM8	-0.872684	1.97531e-06	2.93401e-05	83	478
NCRNA00092	-0.673826	1.97617e-06	2.93401e-05	83	476
TRIM2	-0.755704	1.97769e-06	2.93408e-05	83	478
POP5	0.421375	1.98304e-06	2.9386e-05	83	478
EXPH5	-0.648332	1.98367e-06	2.9386e-05	83	478
RARA	-0.415113	1.98883e-06	2.94406e-05	83	478
PPP1R11	0.268166	2.01051e-06	2.97395e-05	83	478
FGD2	-0.657887	2.0169e-06	2.9812e-05	83	478
PMEPA1	-0.765483	2.02498e-06	2.99093e-05	83	478
MS4A2	-1.01242	2.03969e-06	3.01042e-05	83	476
PRRX2	-1.16088	2.04831e-06	3.02092e-05	83	477
GPSM3	-0.561976	2.05064e-06	3.02212e-05	83	478
ACER1	-0.204789	2.06099e-06	3.03513e-05	83	183
GCNT4	-0.825255	2.10711e-06	3.10077e-05	83	476
P2RX1	-0.69242	2.11172e-06	3.10527e-05	83	478
C21orf128	-0.895561	2.12875e-06	3.12802e-05	83	414
MACF1	-0.514589	2.14285e-06	3.14593e-05	83	478
LRGUK	-0.680357	2.1441e-06	3.14593e-05	83	464
SFRS4	-0.209349	2.16588e-06	3.17556e-05	83	478
IFITM1	-0.802122	2.17429e-06	3.18555e-05	83	478
NCAM2	-0.982657	2.17861e-06	3.18955e-05	83	478
REEP2	-0.860343	2.19031e-06	3.20363e-05	83	477
CCDC109B	-0.65293	2.19143e-06	3.20363e-05	83	478
FAM164A	-0.479207	2.20088e-06	3.21509e-05	83	478
ATP5G3	0.369338	2.20485e-06	3.21854e-05	83	478
FGA	2.68269	2.2545e-06	3.28861e-05	83	474
EGFR	-0.936608	2.27232e-06	3.31219e-05	83	478
MITF	-0.615576	2.27912e-06	3.31772e-05	83	478
MTX1	0.369581	2.27944e-06	3.31772e-05	83	478
ST8SIA1	-0.787254	2.28626e-06	3.32522e-05	83	478
PTRF	-0.502211	2.29103e-06	3.32974e-05	83	478
RANBP3L	-0.772447	2.2955e-06	3.33382e-05	83	459
ZNF660	-0.735865	2.32174e-06	3.36947e-05	83	471
NIT1	0.29709	2.35875e-06	3.42001e-05	83	478
AEBP1	-0.715344	2.35998e-06	3.42001e-05	83	478
PRMT3	0.319896	2.36711e-06	3.42785e-05	83	478
SPATA9	-0.414855	2.37472e-06	3.43523e-05	83	474
DFNA5	-0.805985	2.37565e-06	3.43523e-05	83	478
IDS	-0.517052	2.39279e-06	3.45753e-05	83	478
PA2G4	0.324071	2.40009e-06	3.46557e-05	83	478
COL4A3BP	-0.321102	2.42096e-06	3.49318e-05	83	478
LIMS3-LOC440895	-0.835285	2.43976e-06	3.51776e-05	83	478
SPAG1	-0.604754	2.44657e-06	3.52504e-05	83	478
CCDC146	-0.658796	2.4586e-06	3.53982e-05	83	478
PTPRK	-0.39182	2.46538e-06	3.54703e-05	83	478
CPZ	-0.690275	2.47272e-06	3.55503e-05	83	478
AKR1E2	1.02878	2.47705e-06	3.55869e-05	83	475
ANGPTL2	-0.652755	2.48182e-06	3.56298e-05	83	478
ZYX	-0.458203	2.48604e-06	3.56647e-05	83	478
LEPREL2	-0.67401	2.48812e-06	3.5669e-05	83	478
RASSF5	-0.48927	2.51544e-06	3.60348e-05	83	478
FIGNL2	-0.847012	2.52139e-06	3.60941e-05	83	478
PHF23	0.290358	2.52414e-06	3.61076e-05	83	478
MBOAT1	-0.530368	2.5453e-06	3.63843e-05	83	478
C9orf171	-1.08802	2.55284e-06	3.6466e-05	83	397
UBE2M	0.345362	2.55786e-06	3.64893e-05	83	478
CHUK	0.280071	2.55812e-06	3.64893e-05	83	478
MAN1C1	-0.652301	2.56047e-06	3.64968e-05	83	478
HAVCR2	-0.741344	2.57088e-06	3.66188e-05	83	478
ACAD8	-0.493437	2.5727e-06	3.66188e-05	83	478
GEFT	-0.531505	2.58012e-06	3.66982e-05	83	478
CYLD	-0.328594	2.59341e-06	3.68522e-05	83	478
SESN3	-0.784618	2.59462e-06	3.68522e-05	83	478
RNPEP	0.368976	2.6063e-06	3.69917e-05	83	478
SFXN3	-0.486638	2.6379e-06	3.74136e-05	83	478
CHAC2	0.495156	2.64001e-06	3.7417e-05	83	478
PDZD4	-0.790183	2.65729e-06	3.76353e-05	83	478
MYO1F	-0.607762	2.6632e-06	3.76922e-05	83	478
LRRC33	-0.584876	2.70208e-06	3.81909e-05	83	478
BTG1	0.449297	2.70254e-06	3.81909e-05	83	478
CD28	-0.754947	2.70417e-06	3.81909e-05	83	478
QKI	-0.366693	2.72446e-06	3.84502e-05	83	478
YSK4	-1.05841	2.73655e-06	3.85825e-05	83	431
F13A1	-0.986239	2.73769e-06	3.85825e-05	83	478
CTNNB1	-0.358706	2.74054e-06	3.85954e-05	83	478
LRP2BP	-0.605032	2.74319e-06	3.86056e-05	83	478
CYTIP	-0.620305	2.75484e-06	3.87422e-05	83	478
CCR2	-0.744005	2.76359e-06	3.8838e-05	83	478
CYP2S1	-0.933422	2.78086e-06	3.90532e-05	83	478
SPATS2L	-0.567754	2.78515e-06	3.9086e-05	83	478
BCL10	-0.332941	2.79244e-06	3.91607e-05	83	478
PRIC285	-0.542057	2.7989e-06	3.92238e-05	83	478
C6orf222	-1.11592	2.81801e-06	3.9464e-05	83	447
SLA	-0.684267	2.83314e-06	3.96481e-05	83	478
FAM18B2	0.353446	2.85092e-06	3.98447e-05	83	478
MMD	-0.739828	2.85118e-06	3.98447e-05	83	478
ADAMTS3	-0.842367	2.85359e-06	3.98506e-05	83	478
SLC27A1	-0.466695	2.86021e-06	3.99151e-05	83	478
GPR82	-0.769259	2.86739e-06	3.99874e-05	83	477
ATF4	0.286232	2.88317e-06	4.01795e-05	83	478
CENPJ	0.513915	2.89633e-06	4.03347e-05	83	478
C10orf93	-0.765916	2.90148e-06	4.03713e-05	83	406
PPPDE2	0.525837	2.903e-06	4.03713e-05	83	478
ANAPC7	0.288133	2.93443e-06	4.078e-05	83	478
EHD2	-0.636311	2.93745e-06	4.07936e-05	83	478
FSTL1	-0.555616	2.9418e-06	4.07978e-05	83	478
ZC3H12D	-0.58475	2.94184e-06	4.07978e-05	83	477
CCR9	-0.697876	2.97029e-06	4.11603e-05	83	405
TTC16	-0.722507	2.97209e-06	4.11603e-05	83	468
C1orf56	0.568269	2.98435e-06	4.12737e-05	83	478
CYBB	-0.877201	2.98441e-06	4.12737e-05	83	478
SYDE1	-0.465823	3.01284e-06	4.1638e-05	83	478
C1QTNF7	-0.904555	3.02002e-06	4.17081e-05	83	478
RAP2B	-0.423706	3.02209e-06	4.17081e-05	83	478
MYH1	-0.491795	3.03056e-06	4.17961e-05	83	281
STAP1	-0.873807	3.07053e-06	4.23182e-05	83	478
ITGAX	-0.717486	3.07891e-06	4.24046e-05	83	478
KIAA0247	-0.380841	3.09506e-06	4.25808e-05	83	478
CTDSPL	-0.370214	3.09597e-06	4.25808e-05	83	478
FDPS	0.323075	3.09847e-06	4.25858e-05	83	478
DAB2	-0.530019	3.10887e-06	4.26994e-05	83	478
PTS	0.418827	3.1283e-06	4.29176e-05	83	478
ZNHIT6	-0.305195	3.13059e-06	4.29176e-05	83	478
ALDH9A1	0.307902	3.1312e-06	4.29176e-05	83	478
DOK3	-0.617444	3.13557e-06	4.29481e-05	83	478
LOC401463	-0.504621	3.14362e-06	4.30027e-05	83	453
TCEAL3	-0.460832	3.14462e-06	4.30027e-05	83	478
CXorf64	-0.696963	3.14601e-06	4.30027e-05	83	281
ZNF626	-0.937673	3.15105e-06	4.30422e-05	83	478
TMEM200B	-0.801698	3.16057e-06	4.31177e-05	83	478
DTYMK	0.448244	3.1609e-06	4.31177e-05	83	478
FAM74A3	-0.0612713	3.16422e-06	4.31336e-05	83	35
C10orf55	-0.900536	3.18159e-06	4.33407e-05	83	474
POM121L8P	-0.602608	3.19454e-06	4.34611e-05	83	440
CEP120	-0.314211	3.19477e-06	4.34611e-05	83	478
FOXC1	-0.839721	3.21674e-06	4.37302e-05	83	478
CSDC2	-0.701101	3.22885e-06	4.3865e-05	83	478
PLCG1	-0.395657	3.25657e-06	4.42115e-05	83	478
PIK3IP1	-0.454753	3.27105e-06	4.43779e-05	83	478
RPSAP52	-0.833676	3.27454e-06	4.43951e-05	83	385
SPON2	-0.750878	3.27852e-06	4.44189e-05	83	478
GPR84	-0.92475	3.29867e-06	4.46616e-05	83	477
TMEM183A	0.331745	3.30794e-06	4.47569e-05	83	478
RIN3	-0.499747	3.33478e-06	4.50627e-05	83	478
SLCO2B1	-0.732174	3.33506e-06	4.50627e-05	83	478
CCDC42	-0.367999	3.37055e-06	4.55116e-05	83	311
RGS19	-0.438658	3.37615e-06	4.55564e-05	83	478
SPRY1	-0.484211	3.38435e-06	4.56058e-05	83	478
GPR12	-0.744883	3.38438e-06	4.56058e-05	83	281
MYBPC2	-0.987558	3.39001e-06	4.56509e-05	83	466
FCGR2C	-0.796817	3.42343e-06	4.60435e-05	83	478
EFNB1	-0.574914	3.42377e-06	4.60435e-05	83	478
RTN1	-0.866887	3.44052e-06	4.62377e-05	83	478
DNAJB5	-0.402001	3.45531e-06	4.64052e-05	83	478
FRMD5	-1.1271	3.47222e-06	4.6601e-05	83	477
BCL11B	-0.742943	3.48365e-06	4.6723e-05	83	478
ORC2L	0.258298	3.48934e-06	4.6768e-05	83	478
SLC4A8	-1.0508	3.49583e-06	4.68235e-05	83	478
PELP1	0.330534	3.51689e-06	4.7074e-05	83	478
LOC441204	-0.684245	3.52326e-06	4.71059e-05	83	478
ZNF791	-0.362681	3.52398e-06	4.71059e-05	83	478
OAS2	-0.700408	3.56419e-06	4.76115e-05	83	478
ZFYVE20	-0.294264	3.57725e-06	4.77541e-05	83	478
PDF	0.34921	3.5797e-06	4.77548e-05	83	478
STBD1	-0.691118	3.58372e-06	4.77765e-05	83	478
C13orf26	-0.597378	3.58881e-06	4.78125e-05	83	281
C1orf190	-0.606262	3.59762e-06	4.7898e-05	83	477
PPM1K	-0.503693	3.62286e-06	4.82019e-05	83	478
WDFY2	-0.287289	3.6581e-06	4.86384e-05	83	478
ACTG2	-0.851096	3.66376e-06	4.86812e-05	83	478
KIAA1024	-0.683259	3.68444e-06	4.89235e-05	83	478
FLT3	-0.714163	3.68904e-06	4.89521e-05	83	476
LOC115110	-0.661348	3.69667e-06	4.90057e-05	83	478
GEMIN8P4	0.566555	3.69799e-06	4.90057e-05	83	478
NCRNA00188	0.584234	3.7137e-06	4.91813e-05	83	478
EML2	0.477692	3.75384e-06	4.968e-05	83	478
ALS2CR12	-0.64705	3.76889e-06	4.98461e-05	83	433
FAM118B	-0.404073	3.77274e-06	4.9864e-05	83	478
ABI3	-0.512567	3.77526e-06	4.98644e-05	83	478
C12orf59	-0.730953	3.79152e-06	5.00461e-05	83	477
GALK2	0.3574	3.80243e-06	5.01569e-05	83	478
RSPH10B2	-0.829512	3.81052e-06	5.02305e-05	83	456
C10orf128	-0.742841	3.82626e-06	5.04048e-05	83	478
PSTPIP1	-0.719764	3.84551e-06	5.06249e-05	83	478
2019-03-05	0.222552	3.8609e-06	5.07941e-05	83	478
ASPSCR1	0.549833	3.86517e-06	5.08168e-05	83	478
CRYBB1	-0.646144	3.87402e-06	5.08996e-05	83	466
TMEM180	0.440713	3.89287e-06	5.11138e-05	83	478
TTYH3	-0.50934	3.9238e-06	5.1486e-05	83	478
ZNF763	-0.569667	3.9388e-06	5.1649e-05	83	478
MRPL9	0.294366	3.95041e-06	5.17672e-05	83	478
SAMD9L	-0.730808	3.99957e-06	5.2377e-05	83	478
ZNF625	-0.674849	4.01105e-06	5.24929e-05	83	477
C6orf126	1.17588	4.01843e-06	5.25552e-05	83	362
NDUFB4	0.40404	4.02121e-06	5.25572e-05	83	478
TEX9	-0.625501	4.12158e-06	5.38338e-05	83	478
ZNF20	-0.347526	4.13619e-06	5.39893e-05	83	478
PRUNE	0.303124	4.14712e-06	5.40966e-05	83	478
RNF146	-0.231102	4.15993e-06	5.42283e-05	83	478
DENND1C	-0.35693	4.18483e-06	5.45173e-05	83	478
MRPS18B	0.368141	4.18916e-06	5.45382e-05	83	478
ZNF333	-0.313985	4.19204e-06	5.45402e-05	83	478
TMPRSS2	-1.17698	4.19948e-06	5.46014e-05	83	478
BBS9	-0.381159	4.23368e-06	5.50103e-05	83	478
TRAF3IP3	-0.671205	4.2415e-06	5.50762e-05	83	478
OLR1	-0.932171	4.26584e-06	5.53562e-05	83	478
PTPRG	-0.680299	4.26895e-06	5.53606e-05	83	478
C3orf15	-0.981745	4.27539e-06	5.54081e-05	83	474
FGD3	-0.60085	4.28768e-06	5.54941e-05	83	478
ZNF708	-0.462003	4.28831e-06	5.54941e-05	83	478
IGLL1	-0.265162	4.29093e-06	5.54941e-05	83	190
C1orf38	-0.55928	4.29358e-06	5.54941e-05	83	478
TMEM43	-0.339687	4.2959e-06	5.54941e-05	83	478
ATP8A2	-0.917518	4.31913e-06	5.57581e-05	83	477
IL4R	-0.400468	4.34711e-06	5.60831e-05	83	478
MSR1	-0.770369	4.35327e-06	5.61263e-05	83	478
RBM43	-0.432991	4.37988e-06	5.64329e-05	83	478
PSMB5	0.326572	4.38601e-06	5.64756e-05	83	478
SLC30A3	1.12423	4.40405e-06	5.66714e-05	83	461
RASGRF2	-0.618588	4.41559e-06	5.67832e-05	83	478
COL16A1	-0.615684	4.42736e-06	5.6898e-05	83	478
WIPF1	-0.536523	4.43295e-06	5.69333e-05	83	478
CXorf23	-0.339927	4.44046e-06	5.6993e-05	83	478
SYTL4	-0.642684	4.44666e-06	5.7036e-05	83	478
SLC12A2	-0.707761	4.50647e-06	5.77661e-05	83	478
HMHA1	-0.517687	4.55363e-06	5.83332e-05	83	478
CASP1	-0.622747	4.5692e-06	5.84952e-05	83	478
TRPV2	-0.551617	4.57609e-06	5.85112e-05	83	478
COX17	0.36735	4.57631e-06	5.85112e-05	83	478
MRPS21	0.421522	4.58302e-06	5.85595e-05	83	478
SULT1A3	0.545222	4.59353e-06	5.86135e-05	83	478
COPS7A	0.284127	4.59584e-06	5.86135e-05	83	478
RBM45	0.18447	4.59605e-06	5.86135e-05	83	478
ZNF700	-0.384917	4.61007e-06	5.87549e-05	83	478
PLCH2	-0.952162	4.63193e-06	5.89959e-05	83	478
KIAA1274	-0.549887	4.64039e-06	5.90659e-05	83	478
DUSP10	-0.580455	4.64755e-06	5.91194e-05	83	478
CKMT1B	1.27209	4.68011e-06	5.94957e-05	83	476
TGFB1I1	-0.471139	4.72013e-06	5.99542e-05	83	478
SMAD1	-0.376861	4.72217e-06	5.99542e-05	83	478
CDR2	-0.400046	4.7306e-06	6.00231e-05	83	478
TGFBI	-0.856605	4.73457e-06	6.00353e-05	83	478
EVI2A	-0.678275	4.75978e-06	6.03166e-05	83	478
MN1	-0.694744	4.76798e-06	6.03823e-05	83	478
KRTCAP3	0.841132	4.77984e-06	6.04942e-05	83	478
NIT2	0.381485	4.78596e-06	6.05333e-05	83	478
IFIH1	-0.553803	4.79964e-06	6.06679e-05	83	478
IL27RA	-0.552314	4.80422e-06	6.06783e-05	83	478
CCDC74B	-0.824218	4.80654e-06	6.06783e-05	83	477
WFDC10B	-0.949348	4.82145e-06	6.08282e-05	83	451
BZW1	0.384517	4.82613e-06	6.08488e-05	83	478
GGTLC1	-1.43966	4.8406e-06	6.09928e-05	83	476
TMEM119	-0.545896	4.846e-06	6.10224e-05	83	478
PITRM1	0.383782	4.85455e-06	6.10916e-05	83	478
RETN	-1.08547	4.88701e-06	6.14613e-05	83	447
C14orf4	-0.399076	4.89746e-06	6.1554e-05	83	478
EXOSC1	0.295333	4.90718e-06	6.16374e-05	83	478
ZNF649	-0.499484	4.91613e-06	6.1711e-05	83	478
SIRPA	-0.680173	4.92243e-06	6.17513e-05	83	478
CCDC46	-0.588772	4.92848e-06	6.17522e-05	83	478
NLRP1	-0.718885	4.92868e-06	6.17522e-05	83	478
TCTE1	-0.78118	4.93717e-06	6.18197e-05	83	393
MX2	-0.668402	4.94437e-06	6.18712e-05	83	478
GABBR2	-1.26139	4.94789e-06	6.18765e-05	83	468
C1QTNF3	-0.875784	4.96667e-06	6.20725e-05	83	478
CDH4	-0.860368	4.97594e-06	6.21495e-05	83	419
CTSK	-0.635827	5.00841e-06	6.25068e-05	83	478
HLA-DQA2	-1.05957	5.0108e-06	6.25068e-05	83	478
BCS1L	0.275883	5.01677e-06	6.25422e-05	83	478
CXCL12	-0.715996	5.0334e-06	6.26989e-05	83	478
EBF4	-0.688259	5.03561e-06	6.26989e-05	83	478
RYBP	-0.260358	5.0818e-06	6.32345e-05	83	478
DARS	0.271155	5.12891e-06	6.3781e-05	83	478
NHEJ1	0.270721	5.187e-06	6.44446e-05	83	478
ERP29	0.451256	5.18872e-06	6.44446e-05	83	478
CAPZB	-0.222573	5.25241e-06	6.51952e-05	83	478
CATSPER1	-1.11059	5.26418e-06	6.53007e-05	83	470
MATN3	-0.765957	5.28899e-06	6.55677e-05	83	478
ZNF365	-0.773114	5.30902e-06	6.57753e-05	83	478
PTPN7	-0.689693	5.37828e-06	6.65777e-05	83	478
ACTBL2	-0.884124	5.38046e-06	6.65777e-05	83	429
SPEF2	-0.637352	5.38976e-06	6.66516e-05	83	478
DVL2	0.271516	5.45135e-06	6.73715e-05	83	478
MGST3	0.371469	5.47552e-06	6.76285e-05	83	478
HCK	-0.781088	5.48037e-06	6.76465e-05	83	478
PTPRD	-0.786896	5.48894e-06	6.77105e-05	83	478
CKS1B	0.548909	5.49851e-06	6.77558e-05	83	478
MTM1	-0.369827	5.49939e-06	6.77558e-05	83	478
AVEN	0.374972	5.51294e-06	6.78809e-05	83	478
SERPINB5	1.80218	5.5432e-06	6.82075e-05	83	455
FBN1	-0.657112	5.5463e-06	6.82075e-05	83	478
LOXL4	-0.813634	5.58131e-06	6.85959e-05	83	478
PLEKHO1	-0.514688	5.59841e-06	6.87452e-05	83	478
ZNFX1	-0.379961	5.60034e-06	6.87452e-05	83	478
LAYN	-0.607568	5.62872e-06	6.90511e-05	83	478
ECE1	-0.468897	5.64721e-06	6.92355e-05	83	478
FPR3	-0.767129	5.78648e-06	7.08995e-05	83	478
AGA	0.654106	5.79674e-06	7.09817e-05	83	478
CORIN	-0.770345	5.81498e-06	7.11613e-05	83	478
NTAN1	-0.312192	5.84521e-06	7.14876e-05	83	478
FHOD3	-1.00651	5.90495e-06	7.21741e-05	83	478
AQP6	-0.984592	5.9187e-06	7.22928e-05	83	447
HAL	1.51823	5.9219e-06	7.22928e-05	83	477
IRS2	0.889252	5.9265e-06	7.23048e-05	83	478
FMO1	-0.837002	5.93295e-06	7.23392e-05	83	477
VPS52	0.298674	5.94582e-06	7.24519e-05	83	478
FAM23A	-0.733709	6.00381e-06	7.31107e-05	83	476
RAB43	-0.409301	6.0072e-06	7.31107e-05	83	478
IGF2	-1.13786	6.07153e-06	7.38488e-05	83	478
CTTNBP2	-0.842093	6.09156e-06	7.40472e-05	83	478
PCDHGC5	-0.750419	6.10611e-06	7.4179e-05	83	463
SLC25A29	-0.581001	6.1388e-06	7.45309e-05	83	478
RALGDS	-0.322798	6.16022e-06	7.47455e-05	83	478
KIAA1486	-1.00451	6.17134e-06	7.4835e-05	83	457
COL10A1	-0.94453	6.20233e-06	7.51651e-05	83	478
GPT	1.11079	6.21063e-06	7.5193e-05	83	473
GPC4	-0.772841	6.21215e-06	7.5193e-05	83	478
IL3RA	-0.462613	6.21745e-06	7.52116e-05	83	478
KRT39	-0.625966	6.22406e-06	7.5246e-05	83	356
ELN	-0.83018	6.24569e-06	7.54618e-05	83	478
GTF2E2	0.323009	6.258e-06	7.55648e-05	83	478
TTC25	-0.700375	6.29062e-06	7.59129e-05	83	478
FLVCR1	0.483623	6.33978e-06	7.646e-05	83	478
WDR86	-1.02678	6.37617e-06	7.68524e-05	83	477
TYROBP	-0.664092	6.42121e-06	7.73487e-05	83	478
SLC5A7	-0.654936	6.43366e-06	7.7452e-05	83	311
HIST1H1C	0.753584	6.4449e-06	7.75405e-05	83	478
RASGRP3	-0.409277	6.45874e-06	7.76603e-05	83	478
GGT3P	-0.747714	6.56006e-06	7.88311e-05	83	478
MAGEL2	-0.624873	6.57612e-06	7.89767e-05	83	475
NMNAT2	-1.36898	6.58089e-06	7.89865e-05	83	478
PRKRA	0.233589	6.59155e-06	7.90669e-05	83	478
NCF2	-0.591275	6.62558e-06	7.94275e-05	83	478
ELL3	0.497413	6.63797e-06	7.94848e-05	83	478
LIPT2	0.425581	6.63915e-06	7.94848e-05	83	478
EID3	0.655736	6.64229e-06	7.94848e-05	83	478
TPM1	-0.501061	6.66285e-06	7.96511e-05	83	478
LY75	-0.638855	6.66416e-06	7.96511e-05	83	478
PIGF	0.296546	6.67667e-06	7.97529e-05	83	478
CABIN1	-0.37732	6.70196e-06	8.00071e-05	83	478
CHD9	-0.33516	6.70697e-06	8.00192e-05	83	478
IGFBP4	-0.502949	6.74071e-06	8.03737e-05	83	478
GTF3C5	0.323483	6.77453e-06	8.06857e-05	83	478
SGK269	-0.427231	6.77554e-06	8.06857e-05	83	478
PRKCA	-0.690859	6.77899e-06	8.06857e-05	83	478
HR	-0.83926	6.84408e-06	8.1412e-05	83	477
ZNF521	-0.643857	6.91286e-06	8.21812e-05	83	478
RARRES3	-0.848453	6.94655e-06	8.25181e-05	83	478
C1orf66	0.357479	6.95355e-06	8.25181e-05	83	478
DACT1	-0.686844	6.95358e-06	8.25181e-05	83	478
NRP1	-0.52348	6.97189e-06	8.26862e-05	83	478
SCARNA9	-0.510967	6.98943e-06	8.28451e-05	83	465
HMGA2	-1.75976	7.0117e-06	8.30597e-05	83	463
FKBP4	0.49623	7.02274e-06	8.31412e-05	83	478
RAB26	0.871757	7.03029e-06	8.31813e-05	83	478
ABCB9	-0.5388	7.05687e-06	8.34464e-05	83	478
LRMP	-0.793333	7.0661e-06	8.35062e-05	83	478
AAGAB	0.259333	7.11324e-06	8.40136e-05	83	478
MPZL2	-0.680921	7.20643e-06	8.50639e-05	83	478
FLT3LG	-0.575126	7.21308e-06	8.50715e-05	83	478
TSGA10IP	-0.334474	7.21558e-06	8.50715e-05	83	337
TMEM20	0.508883	7.22469e-06	8.51286e-05	83	478
PTPRC	-0.736115	7.26837e-06	8.55928e-05	83	478
COL8A1	-0.798513	7.29558e-06	8.58627e-05	83	478
FER1L5	-0.778782	7.30792e-06	8.59573e-05	83	432
RASGRP2	-0.663058	7.36635e-06	8.65936e-05	83	478
TTC7B	-0.544856	7.391e-06	8.68323e-05	83	478
C12orf35	-0.413954	7.42096e-06	8.71331e-05	83	478
STK32B	-0.896989	7.43478e-06	8.72441e-05	83	477
CPS1	2.60284	7.50009e-06	8.79588e-05	83	478
MDH2	0.31142	7.51481e-06	8.80797e-05	83	478
PIGM	0.333531	7.53165e-06	8.82254e-05	83	478
TNFSF8	-0.715318	7.5486e-06	8.83721e-05	83	478
SPRR3	-1.08254	7.56347e-06	8.84944e-05	83	307
C17orf37	0.47557	7.57365e-06	8.8532e-05	83	478
CHSY1	-0.403273	7.57554e-06	8.8532e-05	83	478
FAM110C	0.803892	7.598e-06	8.87425e-05	83	464
C14orf2	0.374723	7.60719e-06	8.87979e-05	83	478
MAPKAPK3	-0.388514	7.64464e-06	8.9183e-05	83	478
LOC202181	-0.578056	7.65602e-06	8.92512e-05	83	478
LIMA1	-0.411047	7.65942e-06	8.92512e-05	83	478
NKD2	-0.743157	7.6672e-06	8.92899e-05	83	478
UGT1A4	0.665173	7.67819e-06	8.93657e-05	83	70
ZNF189	-0.308303	7.69822e-06	8.95467e-05	83	478
CDH23	-0.807151	7.70943e-06	8.96249e-05	83	478
CNOT7	0.30514	7.7183e-06	8.96759e-05	83	478
PRKAG1	0.275603	7.7494e-06	8.99849e-05	83	478
PPP1R7	0.213851	7.77891e-06	9.02751e-05	83	478
NDUFB3	0.316229	7.83212e-06	9.08398e-05	83	478
SLC31A2	-0.536411	7.84179e-06	9.08993e-05	83	478
MAP1D	0.388422	7.86486e-06	9.11138e-05	83	478
JHDM1D	-0.350456	7.88399e-06	9.1249e-05	83	478
ANTXR1	-0.630586	7.88566e-06	9.1249e-05	83	478
DCBLD2	-0.655735	7.90051e-06	9.13679e-05	83	478
CCRL2	-0.588275	8.08857e-06	9.34888e-05	83	478
RCN3	-0.714458	8.09617e-06	9.35224e-05	83	478
IMPG1	-0.538537	8.12525e-06	9.38042e-05	83	459
FASN	0.771777	8.14304e-06	9.39298e-05	83	478
RTN4R	-0.614656	8.14553e-06	9.39298e-05	83	478
FAM20B	0.272646	8.16581e-06	9.41093e-05	83	478
IFIT5	-0.401968	8.23075e-06	9.48031e-05	83	478
SIGLEC14	-0.914214	8.23554e-06	9.48036e-05	83	466
C10orf107	-1.00864	8.24423e-06	9.48211e-05	83	454
ARNT2	-0.807557	8.24655e-06	9.48211e-05	83	478
SPEG	-0.867214	8.25457e-06	9.48587e-05	83	478
FOXB1	-0.761807	8.28186e-06	9.51176e-05	83	325
SLC16A10	-0.682529	8.28816e-06	9.51353e-05	83	478
NAMPT	0.697059	8.31702e-06	9.54118e-05	83	478
KCNV1	1.32374	8.41068e-06	9.64309e-05	83	294
PPARD	-0.357247	8.41591e-06	9.64355e-05	83	478
FNIP1	-0.297839	8.42672e-06	9.64632e-05	83	478
F12	0.735396	8.42798e-06	9.64632e-05	83	478
PIK3AP1	-0.717942	8.447e-06	9.66256e-05	83	478
NR2F1	-0.672304	8.46117e-06	9.67322e-05	83	478
IGFL2	-1.12901	8.49978e-06	9.71181e-05	83	465
SPTLC2	-0.339841	8.58449e-06	9.80299e-05	83	478
TSPAN9	-0.399373	8.66199e-06	9.88054e-05	83	478
DUT	0.292553	8.66229e-06	9.88054e-05	83	478
PLA2G5	-0.583856	8.66874e-06	9.88227e-05	83	477
C14orf149	0.480864	8.71543e-06	9.92983e-05	83	478
PM20D1	-0.571347	8.75681e-06	9.97128e-05	83	405
CAPSL	-1.12226	8.8114e-06	0.000100277	83	423
DPYSL2	-0.589984	8.82378e-06	0.000100361	83	478
DOK5	-0.913709	8.87803e-06	0.000100921	83	478
SLC24A4	-0.632138	8.91107e-06	0.000101195	83	474
GLIS2	-0.469797	8.91231e-06	0.000101195	83	478
AGPHD1	0.503308	9.00726e-06	0.000102215	83	477
USP2	-0.815609	9.10379e-06	0.000103252	83	476
LOC100126784	-0.876863	9.12592e-06	0.000103444	83	476
SLC25A3	0.266501	9.13753e-06	0.000103517	83	478
COL9A2	-0.990108	9.16868e-06	0.000103811	83	478
ABCC1	0.515354	9.19146e-06	0.00010401	83	478
FASTKD1	0.306488	9.21349e-06	0.000104201	83	478
SCRG1	-0.547178	9.24212e-06	0.000104465	83	337
SMYD2	0.335812	9.25505e-06	0.000104552	83	478
DIO1	-1.00324	9.28599e-06	0.000104843	83	464
CCDC88C	-0.466689	9.30377e-06	0.000104984	83	478
TGIF1	0.384998	9.35203e-06	0.000105469	83	478
HAND1	-0.608062	9.37264e-06	0.000105642	83	253
MIOS	-0.249108	9.41348e-06	0.000106042	83	478
C21orf91	-0.484042	9.43357e-06	0.000106184	83	478
C11orf66	-0.701335	9.4367e-06	0.000106184	83	476
KIAA1751	-0.760892	9.4503e-06	0.000106277	83	446
TIPIN	0.381204	9.52081e-06	0.00010701	83	478
FGD5	-0.505968	9.53493e-06	0.000107109	83	478
CHCHD1	0.353822	9.55421e-06	0.000107213	83	478
LOC168474	-0.57356	9.55811e-06	0.000107213	83	453
ICOSLG	-0.48494	9.5603e-06	0.000107213	83	478
COL29A1	-1.09752	9.58123e-06	0.000107387	83	472
RHBDL3	-0.875893	9.59728e-06	0.000107507	83	470
ITGAL	-0.626311	9.62898e-06	0.000107801	83	478
LGSN	1.54367	9.64023e-06	0.000107867	83	467
CASK	-0.405367	9.64996e-06	0.000107915	83	478
CD5	-0.720982	9.76561e-06	0.000109148	83	478
CCR8	-0.659604	9.83471e-06	0.000109752	83	470
BLOC1S2	0.308459	9.83577e-06	0.000109752	83	478
ZNF14	-0.411102	9.83613e-06	0.000109752	83	478
SHROOM2	-0.618569	9.90262e-06	0.000110432	83	478
C2orf76	0.399041	9.95734e-06	0.00011098	83	478
TRAM1	-0.40951	9.98434e-06	0.000111219	83	478
WFDC11	-0.192598	1.00083e-05	0.000111421	83	103
ATP1B1	0.742813	1.00136e-05	0.000111421	83	478
NOP56	0.321956	1.0032e-05	0.000111564	83	478
GHR	-0.618147	1.00725e-05	0.000111931	83	478
DCUN1D3	-0.31622	1.00762e-05	0.000111931	83	478
SLC25A15	0.432929	1.00836e-05	0.000111951	83	478
CACNA2D4	-0.422699	1.02051e-05	0.000113236	83	478
LOC153684	-0.547837	1.02316e-05	0.000113468	83	478
SLC1A3	-0.794965	1.02873e-05	0.000114022	83	478
PANK1	0.508489	1.03067e-05	0.000114174	83	478
MRPS11	0.331354	1.03159e-05	0.000114199	83	478
C1orf192	-0.65136	1.03205e-05	0.000114199	83	478
ZBBX	-1.01901	1.033e-05	0.000114242	83	409
PDZD7	-0.80252	1.03519e-05	0.00011442	83	474
ZNF101	-0.344278	1.03616e-05	0.000114422	83	478
PRKACA	-0.210558	1.03635e-05	0.000114422	83	478
TXNDC6	-0.644425	1.03776e-05	0.000114515	83	474
CSPG5	-0.782529	1.039e-05	0.000114588	83	478
C8G	0.870946	1.04159e-05	0.00011481	83	425
EXOSC8	0.376454	1.05563e-05	0.000116241	83	478
ICAM5	-1.0045	1.05573e-05	0.000116241	83	477
ETFB	0.46968	1.05722e-05	0.000116341	83	478
XYLT1	-0.775128	1.06417e-05	0.000117041	83	478
MMP14	-0.549207	1.06512e-05	0.000117082	83	478
BRSK2	1.0984	1.06646e-05	0.000117164	83	467
KCTD3	0.498362	1.0677e-05	0.000117236	83	478
ELK3	-0.546426	1.07053e-05	0.000117482	83	478
MTG1	0.370788	1.0741e-05	0.000117809	83	478
FLJ37543	-0.288712	1.07986e-05	0.000118376	83	305
MANBAL	0.293473	1.08258e-05	0.000118552	83	478
CCDC33	-0.992315	1.08284e-05	0.000118552	83	409
ANKRD22	-1.01832	1.08325e-05	0.000118552	83	478
LRP1	-0.525936	1.08534e-05	0.000118716	83	478
LOC728392	-0.59769	1.09351e-05	0.000119544	83	478
C10orf58	0.286705	1.10208e-05	0.000120415	83	478
PKIG	-0.44803	1.10545e-05	0.000120717	83	478
NXNL1	-0.0810671	1.1061e-05	0.000120718	83	44
SMPDL3A	-0.591413	1.10666e-05	0.000120718	83	478
ICAM3	-0.413605	1.10796e-05	0.000120794	83	478
CPXM1	-0.745587	1.11837e-05	0.000121804	83	478
OR7D2	-0.489956	1.11844e-05	0.000121804	83	323
TARS2	0.266625	1.12031e-05	0.00012194	83	478
MGAT1	-0.26496	1.12151e-05	0.000122005	83	478
ARID5A	-0.439587	1.12529e-05	0.000122349	83	478
LILRA6	-0.748014	1.13101e-05	0.000122904	83	478
BPI	-0.525261	1.13423e-05	0.000123158	83	356
PPIF	0.353007	1.13457e-05	0.000123158	83	478
CCL2	-0.623636	1.13786e-05	0.000123447	83	478
UNC5B	-0.565874	1.14398e-05	0.000124044	83	478
PVRL3	-0.856183	1.14522e-05	0.000124111	83	478
CCND1	-0.688846	1.14585e-05	0.000124112	83	478
PNPLA6	-0.360161	1.14847e-05	0.00012431	83	478
ARHGAP24	-0.469306	1.14892e-05	0.00012431	83	478
DDX58	-0.432589	1.15227e-05	0.000124605	83	478
OGT	-0.393702	1.15411e-05	0.000124716	83	478
TRPV4	-0.824181	1.15455e-05	0.000124716	83	478
ZNF699	-0.618176	1.16002e-05	0.00012524	83	477
C8orf47	1.08864	1.16209e-05	0.000125395	83	470
EEF1E1	0.352043	1.16747e-05	0.000125908	83	478
DNAJC18	-0.40027	1.17478e-05	0.000126628	83	478
VCAM1	-0.75036	1.17813e-05	0.00012692	83	478
C6orf130	0.286298	1.1792e-05	0.000126967	83	478
ORAI2	-0.41958	1.17997e-05	0.000126982	83	478
TTC32	0.459472	1.18532e-05	0.000127488	83	478
RGMA	-0.886763	1.19117e-05	0.000128044	83	477
LSM4	0.365667	1.19176e-05	0.000128044	83	478
WISP1	-0.747103	1.19836e-05	0.000128684	83	478
ZNF423	-0.543565	1.19956e-05	0.000128743	83	478
SERPING1	-0.489434	1.20208e-05	0.000128899	83	478
MFSD2A	-0.671409	1.20298e-05	0.000128899	83	478
SMAD7	-0.43831	1.20315e-05	0.000128899	83	478
RAN	0.378754	1.20359e-05	0.000128899	83	478
IGF1	-0.753818	1.20461e-05	0.000128939	83	478
TUFM	0.287076	1.20706e-05	0.000129133	83	478
SUMO1P1	-0.390658	1.2078e-05	0.000129142	83	348
CMTM7	-0.489099	1.20919e-05	0.000129195	83	478
PCDHGA9	-0.716493	1.20982e-05	0.000129195	83	477
MTHFS	0.417856	1.21106e-05	0.000129195	83	478
ZMYND10	-1.00387	1.21125e-05	0.000129195	83	478
MS4A4A	-0.667848	1.21152e-05	0.000129195	83	478
GYPC	-0.469075	1.21686e-05	0.000129695	83	478
HADHB	0.206252	1.22416e-05	0.000130404	83	478
AZU1	-0.836579	1.22545e-05	0.000130471	83	407
MDH1	0.23681	1.22817e-05	0.000130691	83	478
CCDC51	0.334032	1.22951e-05	0.000130764	83	478
GLCE	0.392672	1.23061e-05	0.000130811	83	478
CYP46A1	-0.585883	1.23943e-05	0.000131635	83	477
PSMA1	0.234573	1.24038e-05	0.000131635	83	478
MGAT3	-0.731486	1.24102e-05	0.000131635	83	478
GUCY1B3	-0.533343	1.24159e-05	0.000131635	83	478
PCDHGC3	-0.403903	1.24165e-05	0.000131635	83	478
LGTN	0.342516	1.24577e-05	0.000132001	83	478
C6orf136	0.402741	1.24929e-05	0.000132304	83	478
THEM5	0.747795	1.25268e-05	0.000132593	83	469
NR5A1	-0.53299	1.25419e-05	0.000132682	83	320
GRIK4	-0.616436	1.26191e-05	0.000133428	83	446
PIP5K1C	-0.309514	1.26326e-05	0.000133445	83	478
SERPINI2	-0.590204	1.2634e-05	0.000133445	83	341
PILRA	-0.64084	1.26878e-05	0.00013392	83	478
HINT1	0.377116	1.26924e-05	0.00013392	83	478
MMP28	-1.06858	1.27693e-05	0.00013466	83	477
GAS1	-0.724681	1.27937e-05	0.000134847	83	478
FXYD5	-0.656941	1.28312e-05	0.000135171	83	478
C10orf54	-0.409303	1.29173e-05	0.000136006	83	478
PHACTR4	-0.245986	1.29645e-05	0.000136431	83	478
LRRC43	-0.765592	1.29823e-05	0.00013653	83	476
PRG2	-0.807195	1.29876e-05	0.00013653	83	477
THSD7B	-0.826538	1.30194e-05	0.000136793	83	470
NOL10	0.211987	1.3057e-05	0.000137116	83	478
LOXL3	-0.594881	1.31128e-05	0.000137629	83	478
GTF3A	0.392721	1.31438e-05	0.000137882	83	478
IL22RA2	-1.00532	1.31701e-05	0.000138086	83	467
RELL1	-0.496314	1.32084e-05	0.000138414	83	478
NKX3-2	-0.75399	1.32157e-05	0.000138419	83	413
ZNF273	-0.439637	1.3234e-05	0.000138538	83	478
IQGAP2	-0.678294	1.33587e-05	0.000139769	83	478
RAB11FIP3	-0.455919	1.33706e-05	0.000139796	83	478
PTGFR	-0.942463	1.33752e-05	0.000139796	83	476
C19orf57	-0.709418	1.33883e-05	0.00013986	83	478
HTR4	-0.47371	1.34023e-05	0.000139933	83	312
FAIM3	-0.665962	1.34382e-05	0.000140234	83	478
SLC16A9	-1.35283	1.34877e-05	0.000140678	83	478
BTN3A3	-0.463596	1.3497e-05	0.000140701	83	478
ARHGAP31	-0.582318	1.3509e-05	0.000140753	83	478
MAGEE2	-0.733562	1.35326e-05	0.000140926	83	400
RNASE2	-0.732834	1.35467e-05	0.000140999	83	476
GIT2	-0.241954	1.35579e-05	0.000141012	83	478
ARX	-1.20796	1.35621e-05	0.000141012	83	457
FLI1	-0.475124	1.35811e-05	0.000141136	83	478
TRIM23	-0.294649	1.36126e-05	0.00014139	83	478
MSL3	-0.236045	1.37715e-05	0.000142966	83	478
COX6A1	0.415939	1.38795e-05	0.000143938	83	478
MS4A6A	-0.680269	1.38795e-05	0.000143938	83	478
MDFIC	-0.518272	1.3939e-05	0.00014448	83	478
NR2E1	-0.798514	1.4026e-05	0.000145263	83	347
LMO4	0.501352	1.40362e-05	0.000145263	83	478
NRG1	0.982377	1.40411e-05	0.000145263	83	475
FAM196B	-0.585892	1.40436e-05	0.000145263	83	443
CACNA1C	-0.650153	1.40698e-05	0.000145373	83	478
PDGFRA	-0.627513	1.40733e-05	0.000145373	83	478
WDR49	-0.88394	1.40761e-05	0.000145373	83	449
ADAMTS9	-0.628978	1.40989e-05	0.000145533	83	478
IDO2	-0.655427	1.41273e-05	0.000145751	83	461
PCBD1	0.393968	1.41849e-05	0.00014627	83	478
DYDC1	-0.591127	1.42141e-05	0.000146495	83	334
RNF130	-0.327687	1.42393e-05	0.00014668	83	478
TSPAN2	-0.590271	1.42789e-05	0.000147011	83	478
PNKD	0.493765	1.4417e-05	0.000148357	83	478
C11orf51	0.314692	1.46198e-05	0.000150366	83	478
CCL17	-1.0294	1.46855e-05	0.000150874	83	472
GCNT1	-0.757765	1.46885e-05	0.000150874	83	478
A2M	-0.59005	1.46918e-05	0.000150874	83	478
KCNE4	1.17413	1.47052e-05	0.000150932	83	478
YY2	-0.54491	1.47126e-05	0.000150932	83	476
WDFY4	-0.840488	1.47316e-05	0.00015105	83	478
CSF3R	-0.805894	1.47705e-05	0.000151371	83	478
ANKRD56	-0.643058	1.47813e-05	0.000151404	83	477
MDGA1	-0.758049	1.47999e-05	0.000151517	83	478
SLC5A3	-0.50828	1.48889e-05	0.000152307	83	478
CD1B	-1.01106	1.48923e-05	0.000152307	83	460
PKD1L3	-0.388354	1.50114e-05	0.00015343	83	381
ITGB1BP2	-0.53543	1.50235e-05	0.00015343	83	469
TMPRSS11D	-0.731257	1.50252e-05	0.00015343	83	300
ZNF562	-0.408409	1.50349e-05	0.000153451	83	478
POMP	0.308346	1.5063e-05	0.000153659	83	478
EGR4	-0.8498	1.51744e-05	0.000154717	83	426
CHST2	-0.610823	1.52531e-05	0.00015544	83	478
TMEM223	0.361638	1.52908e-05	0.000155744	83	478
TATDN3	0.321748	1.53526e-05	0.000156207	83	478
ARHGAP28	-0.664069	1.53554e-05	0.000156207	83	478
PLXNA1	-0.433604	1.53597e-05	0.000156207	83	478
MRPL43	0.332926	1.53831e-05	0.000156366	83	478
LOC441177	0.956574	1.54565e-05	0.000157033	83	165
APOC2	-1.00119	1.55272e-05	0.000157671	83	478
RGS18	-0.678505	1.55435e-05	0.000157685	83	477
LOC283731	-0.612217	1.55444e-05	0.000157685	83	462
CCDC85C	0.394994	1.55982e-05	0.000158151	83	478
SLC12A4	-0.373145	1.56089e-05	0.000158179	83	478
HIVEP2	-0.355472	1.56319e-05	0.000158331	83	478
CISD1	0.340278	1.56577e-05	0.000158512	83	478
PTCD3	0.206299	1.5868e-05	0.000160557	83	478
RBAK	-0.315168	1.58814e-05	0.000160557	83	478
PLXNA3	-0.511123	1.58841e-05	0.000160557	83	478
ZEB2	-0.524189	1.58918e-05	0.000160557	83	478
AUTS2	-0.915122	1.59157e-05	0.000160699	83	478
KIAA1549	0.672842	1.5922e-05	0.000160699	83	478
CLK4	-0.409868	1.59673e-05	0.000161076	83	478
CKMT2	-0.784082	1.60177e-05	0.000161502	83	472
GNA12	-0.359061	1.61561e-05	0.000162816	83	478
APOBEC3G	-0.691875	1.62533e-05	0.000163712	83	478
CCDC80	-0.657725	1.63032e-05	0.000164133	83	478
SEPN1	-0.328815	1.63324e-05	0.000164307	83	478
P2RY13	-0.706115	1.63369e-05	0.000164307	83	478
INPP5B	-0.440292	1.63925e-05	0.000164782	83	478
MRPL46	0.279469	1.64361e-05	0.000165138	83	478
PPP1R9B	-0.306581	1.64684e-05	0.000165299	83	478
C20orf195	-0.718081	1.64687e-05	0.000165299	83	462
AMPD1	-0.853564	1.64932e-05	0.000165462	83	456
MRS2	0.372028	1.6551e-05	0.000165959	83	478
LPIN1	-0.4818	1.65821e-05	0.000166187	83	478
DBNL	-0.264268	1.66224e-05	0.000166508	83	478
POLR1D	0.307235	1.66373e-05	0.000166573	83	478
ZNRF1	0.308202	1.66859e-05	0.000166963	83	478
NECAP2	-0.250122	1.66929e-05	0.000166963	83	478
MIA	-0.880257	1.67623e-05	0.000167573	83	447
[truncated: 17,985 more rows]
